# Supplementary material for: Evolutionarily conserved regulation of immunity by the splicing factor RNP-6/PUF60
Source: eLife. 2020 Jun 15;9:e57591. doi: 10.7554/eLife.57591 (PMC7332298; doi:10.7554/eLife.57591)
Supplement: Figure 2—source data 1. — Non-infected. [file elife-57591-fig2-data1.xlsx]

## Sheet: DEG non-infected 
ensembl_gene_id	gene	locus	sample_1	sample_2	status	value_1	value_2	log2(fold_change)	test_stat	p_value	q_value	significant	GO_id	GO_term	gene_biotype
WBGene00000227	atm-1	I:183363-208467	N2	rnp-6	OK	14.7418	19.9034	0.433107	1.93092	0.0008	0.00816818	yes	GO:0006468; GO:0010212; GO:0006281; GO:0016310; GO:0005634; GO:0016301; GO:0000166; GO:0006974; GO:0004674; GO:0016740; GO:0000785; GO:0007049; GO:0005515; GO:0005524	chromatin; protein phosphorylation; cellular response to DNA damage stimulus; transferase activity; response to ionizing radiation; phosphorylation; kinase activity; nucleus; ATP binding; protein binding; DNA repair; cell cycle; protein serine/threonine kinase activity; nucleotide binding	protein_coding
WBGene00001814	haf-4	I:489983-496154	N2	rnp-6	OK	13.8078	9.50472	-0.538766	-1.91582	0.00115	0.01096	yes	GO:0042626; GO:0006810; GO:0006629; GO:0016021; GO:0016020; GO:0035264; GO:0000166; GO:0005765; GO:0007041; GO:0016887; GO:0015833; GO:0015197; GO:0055085; GO:0005524	multicellular organism growth; lipid metabolic process; ATPase activity; integral component of membrane; peptide transport; lysosomal membrane; ATP binding; ATPase activity, coupled to transmembrane movement of substances; membrane; peptide transporter activity; nucleotide binding; transmembrane transport; transport; lysosomal transport	protein_coding
WBGene00002393	lpr-1	I:557430-561671	N2	rnp-6	OK	2.23002	0.837318	-1.41321	-2.05571	0.0005	0.00551085	yes	; GO:0044765; GO:0005576; GO:0035295; GO:0002119	extracellular region; ; single-organism transport; nematode larval development; tube development	protein_coding
WBGene00022040	Y65B4BR.1	I:562735-565181	N2	rnp-6	OK	9.88215	4.8955	-1.01337	-2.76148	5e-05	0.000725861	yes	GO:0016788	hydrolase activity, acting on ester bonds	protein_coding
WBGene00219767	linc-131	I:1696198-1697676	N2	rnp-6	OK	0	19.7212	inf		0.00635	0.042158	yes
WBGene00022149	lin-65	I:1755328-1766467	N2	rnp-6	OK	39.4106	50.868	0.368174	1.55214	0.0072	0.0464409	yes	; GO:0005634; GO:0003674; GO:0005829; GO:0034514	cytosol; mitochondrial unfolded protein response; molecular_function; nucleus;	protein_coding
WBGene00017398	slc-17.6	I:2250130-2254901	N2	rnp-6	OK	23.9131	16.7802	-0.51104	-1.70459	0.00315	0.0244316	yes	; GO:0016021; GO:0016020; GO:0006820; GO:0022857; GO:0055085	; anion transport; integral component of membrane; transmembrane transporter activity; membrane; transmembrane transport	protein_coding
WBGene00021468	epg-2	I:2293131-2304393	N2	rnp-6	OK	137.06	91.5266	-0.582541	-1.80622	0.0022	0.0184426	yes	GO:0005737; GO:0006914; GO:0016236	cytoplasm; macroautophagy; autophagy	protein_coding
WBGene00021463	zeel-1	I:2342215-2350468	N2	rnp-6	OK	4.33151	2.01736	-1.1024	-3.09253	5e-05	0.000725861	yes	GO:0016021; GO:0016020; GO:0016567; GO:0051438; GO:0031462; GO:0004842	regulation of ubiquitin-protein transferase activity; ubiquitin-protein transferase activity; membrane; protein ubiquitination; Cul2-RING ubiquitin ligase complex; integral component of membrane	protein_coding
WBGene00021275	dmsr-2	I:2533267-2542092	N2	rnp-6	OK	1.51846	3.04818	1.00534	2.27415	0.00015	0.00195025	yes	GO:0008528; GO:0016021; GO:0016020; GO:0007186; GO:0004930	G-protein coupled receptor signaling pathway; G-protein coupled peptide receptor activity; G-protein coupled receptor activity; integral component of membrane; membrane	protein_coding
WBGene00020989	W03D8.8	I:2791688-2794895	N2	rnp-6	OK	0.578019	4.67649	3.01624	5.55726	5e-05	0.000725861	yes	GO:0005737; GO:0006631; GO:0006637; GO:0047617; GO:0016790	acyl-CoA metabolic process; cytoplasm; fatty acid metabolic process; thiolester hydrolase activity; acyl-CoA hydrolase activity	protein_coding
WBGene00001791	gst-43	I:2901334-2903005	N2	rnp-6	OK	12.4059	6.95213	-0.835495	-2.09055	0.00065	0.0068644	yes	GO:0005737; GO:0003824; GO:0016740; GO:0009072; GO:0005515	aromatic amino acid family metabolic process; transferase activity; protein binding; catalytic activity; cytoplasm	protein_coding
WBGene00022122	trap-1	I:2928394-2929679	N2	rnp-6	OK	121.371	157.683	0.377599	1.67888	0.0039	0.0289822	yes	GO:0016021; GO:0016020; GO:0005783; GO:0006613; GO:0005789	endoplasmic reticulum membrane; cotranslational protein targeting to membrane; integral component of membrane; endoplasmic reticulum; membrane	protein_coding
WBGene00020900	T28F2.1	I:3639647-3641391	N2	rnp-6	OK	1.83043	0.247315	-2.88776	-3.44034	0.00015	0.00195025	yes	GO:0036065; GO:0008107; GO:0005975; GO:0016021; GO:0016020; GO:0043413; GO:0016757	transferase activity, transferring glycosyl groups; galactoside 2-alpha-L-fucosyltransferase activity; macromolecule glycosylation; carbohydrate metabolic process; membrane; fucosylation; integral component of membrane	protein_coding
WBGene00016836	C50F2.2	I:3881827-3891518	N2	rnp-6	OK	21.5745	28.3825	0.395673	1.61142	0.00445	0.0321073	yes			protein_coding
WBGene00000779	cpn-3	I:3987890-3988702	N2	rnp-6	OK	159.095	210.939	0.406942	1.75804	0.0024	0.0197654	yes	GO:0030016; GO:0005515	protein binding; myofibril	protein_coding
WBGene00006820	unc-89	I:4035743-4090961	N2	rnp-6	OK	10.1398	16.2517	0.680557	2.32796	5e-05	0.000725861	yes	GO:0005089; GO:0031034; GO:0030241; GO:0017048; GO:0014722; GO:0010628; GO:0045989; GO:0035023; GO:0090736; GO:0005737; GO:0031430; GO:0043547; GO:0031672; GO:0071688; GO:0016740; GO:0004672; GO:0005524; GO:0006468; GO:0034613; GO:0019902; GO:0045214; GO:0060298; GO:0040017; GO:1905552; GO:0005622; GO:0005515; GO:1905905	cytoplasm; positive regulation of sarcomere organization; myosin filament assembly; protein binding; intracellular; positive regulation of GTPase activity; protein kinase activity; ATP binding; cellular protein localization; regulation of Rho protein signal transduction; positive regulation of protein localization to endoplasmic reticulum; M band; striated muscle myosin thick filament assembly; M…	protein_coding
WBGene00002139	inx-17	I:4165134-4167059	N2	rnp-6	OK	12.6341	8.74105	-0.53144	-1.59548	0.00585	0.0395707	yes	GO:0006810; GO:0016021; GO:0016020; GO:0055085; GO:0008150; GO:0055077; GO:0005886; GO:0005243; GO:0006811; GO:0030054; GO:0005921	gap junction hemi-channel activity; transmembrane transport; gap junction; biological_process; integral component of membrane; ion transport; plasma membrane; membrane; cell junction; transport; gap junction channel activity	protein_coding
WBGene00016653	C44E4.4	I:4634102-4635630	N2	rnp-6	OK	174.688	222.756	0.350681	1.61823	0.0051	0.0356206	yes	GO:0006396; GO:0005634; GO:0003723; GO:0003676; GO:0030529	RNA processing; RNA binding; nucleus; intracellular ribonucleoprotein complex; nucleic acid binding	protein_coding
WBGene00170884	C44E4.4	I:4634102-4635630	N2	rnp-6	OK	174.688	222.756	0.350681	1.61823	0.0051	0.0356206	yes
WBGene00020212	T04D1.2	I:4679670-4682755	N2	rnp-6	OK	1.90565	0.844099	-1.1748	-2.04911	0.00155	0.013881	yes	GO:0005515	protein binding	protein_coding
WBGene00015695	ugt-26	I:4721177-4723960	N2	rnp-6	OK	24.8511	35.0985	0.498101	1.97677	0.0006	0.00643061	yes	GO:0008152; GO:0016021; GO:0016020; GO:0016740; GO:0016757; GO:0016758; GO:0015020; GO:0043231	transferase activity, transferring glycosyl groups; transferase activity; membrane; transferase activity, transferring hexosyl groups; metabolic process; glucuronosyltransferase activity; intracellular membrane-bounded organelle; integral component of membrane	protein_coding
WBGene00015693	ugt-28	I:4727300-4730366	N2	rnp-6	OK	12.7463	18.5576	0.541931	1.91167	0.0009	0.00897191	yes	GO:0043231; GO:0016021; GO:0016020; GO:0016740; GO:0008152; GO:0016758; GO:0015020	transferase activity; membrane; integral component of membrane; metabolic process; glucuronosyltransferase activity; intracellular membrane-bounded organelle; transferase activity, transferring hexosyl groups	protein_coding
WBGene00023067	F54D7.6	I:4789232-4789592	N2	rnp-6	OK	571.878	429.983	-0.411426	-1.68971	0.0028	0.0222533	yes	GO:0003735; GO:0005840; GO:0006412	ribosome; translation; structural constituent of ribosome	protein_coding
WBGene00018797	F54D7.2	I:4805606-4809675	N2	rnp-6	OK	150.99	96.0361	-0.652803	-2.94337	5e-05	0.000725861	yes	GO:0016021; GO:0016020; GO:0016780; GO:0008654	phospholipid biosynthetic process; phosphotransferase activity, for other substituted phosphate groups; integral component of membrane; membrane	protein_coding
WBGene00016728	C46H11.2	I:5050048-5052523	N2	rnp-6	OK	11.8305	6.87769	-0.782517	-2.34699	0.0001	0.00135972	yes	GO:0004497; GO:0050660; GO:0004499; GO:0050661; GO:0055114; GO:0016491	N,N-dimethylaniline monooxygenase activity; flavin adenine dinucleotide binding; monooxygenase activity; NADP binding; oxidation-reduction process; oxidoreductase activity	protein_coding
WBGene00018594	aman-3	I:5324510-5330212	N2	rnp-6	OK	9.30013	5.91924	-0.651838	-2.27521	5e-05	0.000725861	yes	GO:0016787; GO:0005975; GO:0006491; GO:0030246; GO:0016021; GO:0016020; GO:0016798; GO:0000139; GO:0006013; GO:0003824; GO:0008270; GO:0008152; GO:0004553; GO:0015923; GO:0046872; GO:0004559; GO:0006517	alpha-mannosidase activity; hydrolase activity, acting on glycosyl bonds; carbohydrate binding; N-glycan processing; hydrolase activity, hydrolyzing O-glycosyl compounds; hydrolase activity; catalytic activity; protein deglycosylation; carbohydrate metabolic process; mannose metabolic process; Golgi membrane; metabolic process; metal ion binding; membrane; zinc ion binding; integral component of …	protein_coding
WBGene00018862	wago-2	I:5368477-5372643	N2	rnp-6	OK	34.0811	49.3329	0.53358	2.35028	5e-05	0.000725861	yes
WBGene00015633	C09D4.2	I:5491473-5493531	N2	rnp-6	OK	34.1869	17.3521	-0.978333	-3.20634	5e-05	0.000725861	yes			protein_coding
WBGene00004224	ptr-10	I:5662142-5668837	N2	rnp-6	OK	1.08699	0.600974	-0.854964	-1.70682	0.0055	0.0377698	yes	GO:0016021; GO:0016020; GO:0018996	molting cycle, collagen and cuticulin-based cuticle; integral component of membrane; membrane	protein_coding
WBGene00000493	che-14	I:5746724-5754278	N2	rnp-6	OK	0.817272	0.441147	-0.889558	-1.69806	0.00415	0.0303769	yes	GO:0016324; GO:0016021; GO:0016020; GO:0007224	apical plasma membrane; integral component of membrane; smoothened signaling pathway; membrane	protein_coding
WBGene00003878	pept-3	I:6133284-6137980	N2	rnp-6	OK	4.7978	3.18097	-0.592905	-1.70621	0.0034	0.0259387	yes	GO:0006857; GO:0042938; GO:0006810; GO:0015992; GO:0005215; GO:0016021; GO:0016020; GO:0042936; GO:0015833; GO:0015252; GO:0015198; GO:0015031	transporter activity; oligopeptide transporter activity; oligopeptide transport; membrane; dipeptide transporter activity; proton transport; dipeptide transport; peptide transport; protein transport; integral component of membrane; transport; proton channel activity	protein_coding
WBGene00020258	T05E7.1	I:6203896-6206929	N2	rnp-6	OK	4.35196	1.19701	-1.86223	-4.01508	5e-05	0.000725861	yes	GO:0005737; GO:0006631; GO:0006637; GO:0047617; GO:0016790	acyl-CoA metabolic process; cytoplasm; fatty acid metabolic process; thiolester hydrolase activity; acyl-CoA hydrolase activity	protein_coding
WBGene00016752	C48E7.7	I:6234718-6235343	N2	rnp-6	OK	2.0803	5.68646	1.45074	2.52077	5e-05	0.000725861	yes			protein_coding
WBGene00019394	K04F10.1	I:6364917-6366228	N2	rnp-6	OK	3.97926	2.30594	-0.787146	-1.75617	0.00315	0.0244316	yes	GO:0003723; GO:0005515	RNA binding; protein binding	protein_coding
WBGene00016943	acdh-1	I:6497437-6499559	N2	rnp-6	OK	246.33	549.514	1.15756	5.22572	5e-05	0.000725861	yes	GO:0050660; GO:0045087; GO:0050829; GO:0008152; GO:0003995; GO:0016627; GO:0055114; GO:0016491	oxidoreductase activity, acting on the CH-CH group of donors; innate immune response; oxidoreductase activity; flavin adenine dinucleotide binding; metabolic process; oxidation-reduction process; defense response to Gram-negative bacterium; acyl-CoA dehydrogenase activity	protein_coding
WBGene00016942	C55B7.3	I:6499840-6501413	N2	rnp-6	OK	2.37271	7.86864	1.72958	4.34945	5e-05	0.000725861	yes	GO:0016787; GO:0016791; GO:0016311; GO:0006470; GO:0004725; GO:0004721; GO:0035335	protein tyrosine phosphatase activity; peptidyl-tyrosine dephosphorylation; phosphatase activity; hydrolase activity; phosphoprotein phosphatase activity; dephosphorylation; protein dephosphorylation	protein_coding
WBGene00022633	ZC581.3	I:6651219-6655429	N2	rnp-6	OK	12.5877	9.30602	-0.43578	-1.51528	0.0072	0.0464409	yes	GO:0016021; GO:0016020	integral component of membrane; membrane	protein_coding
WBGene00004110	pqn-20	I:6791024-6797470	N2	rnp-6	OK	40.6711	52.849	0.377873	1.71485	0.0026	0.0210083	yes			protein_coding
WBGene00001075	dpy-14	I:6843594-6845136	N2	rnp-6	OK	97.9418	56.394	-0.796383	-3.08515	5e-05	0.000725861	yes	GO:0016021; GO:0016020; GO:0005581; GO:0042302	structural constituent of cuticle; collagen trimer; integral component of membrane; membrane	protein_coding
WBGene00006394	taf-11.2	I:7132497-7134329	N2	rnp-6	OK	35.0268	24.4638	-0.517814	-1.86936	0.00145	0.013173	yes	GO:0051123; GO:0005634; GO:0003713; GO:1903506; GO:0006367; GO:0005669; GO:0046982; GO:0008134	transcription factor binding; transcription initiation from RNA polymerase II promoter; RNA polymerase II transcriptional preinitiation complex assembly; protein heterodimerization activity; transcription factor TFIID complex; transcription coactivator activity; nucleus; regulation of nucleic acid-templated transcription	protein_coding
WBGene00010644	K07G5.5	I:7170025-7172189	N2	rnp-6	OK	6.10495	3.85243	-0.664212	-1.67798	0.00425	0.0309824	yes	GO:0016020; GO:0006812; GO:0016021; GO:0008324; GO:0098655; GO:0055085	cation transport; cation transmembrane transporter activity; cation transmembrane transport; integral component of membrane; membrane; transmembrane transport	protein_coding
WBGene00005131	srd-53	I:7294037-7295687	N2	rnp-6	OK	0.279429	0.793724	1.50615	1.72642	0.006	0.0403716	yes	GO:0016021; GO:0016020	integral component of membrane; membrane	protein_coding
WBGene00006752	unc-13	I:7422784-7454088	N2	rnp-6	OK	3.9568	5.6915	0.524474	1.8216	0.0012	0.0113201	yes	GO:0043195; GO:0019992; GO:0016079; GO:0048786; GO:0005622; GO:0060282; GO:0007283; GO:0043051; GO:0045202; GO:0005515; GO:0007268; GO:0035556; GO:0046872; GO:0046662; GO:0005516	synapse; intracellular signal transduction; regulation of pharyngeal pumping; terminal bouton; diacylglycerol binding; regulation of oviposition; protein binding; intracellular; presynaptic active zone; positive regulation of oocyte development; calmodulin binding; synaptic vesicle exocytosis; metal ion binding; chemical synaptic transmission; spermatogenesis	protein_coding
WBGene00000084	aex-1	I:7602310-7608245	N2	rnp-6	OK	5.41849	3.51899	-0.622729	-1.97	0.00065	0.0068644	yes	GO:0040011; GO:0060179; GO:1904731; GO:0018991; GO:0004871; GO:1905885; GO:0006937; GO:0016079; GO:0030421; GO:0006887; GO:0005622; GO:2000294; GO:0098793; GO:0045202; GO:0005515; GO:0014057; GO:0035418; GO:0010877; GO:0007165	synapse; intracellular; protein localization to synapse; presynapse; protein binding; positive regulation of intestinal lipid absorption; signal transduction; regulation of muscle contraction; male mating behavior; oviposition; synaptic vesicle exocytosis; signal transducer activity; positive regulation of acetylcholine secretion, neurotransmission; defecation; positive regulation of defecation; …	protein_coding
WBGene00011975	T24B1.1	I:7676667-7679061	N2	rnp-6	OK	36.1936	27.0421	-0.42053	-1.70847	0.00345	0.0262347	yes	GO:0005794; GO:0007030; GO:0048193; GO:0016021; GO:0016020; GO:0000301; GO:0031985; GO:0000139; GO:0042803	protein homodimerization activity; Golgi apparatus; Golgi organization; retrograde transport, vesicle recycling within Golgi; Golgi membrane; Golgi cisterna; Golgi vesicle transport; membrane; integral component of membrane	protein_coding
WBGene00001595	gld-1	I:7695660-7698154	N2	rnp-6	OK	178.328	233.097	0.386395	1.79896	0.00215	0.018108	yes	GO:0030154; GO:0010629; GO:0003676; GO:0048027; GO:0007275; GO:0005737; GO:0043186; GO:0060282; GO:1905936; GO:0003730; GO:0048477; GO:0010468; GO:2000196; GO:2000623; GO:0051321; GO:0005829; GO:0030716; GO:0003727; GO:0003723; GO:0005515; GO:0017148; GO:0006417	cytosol; RNA binding; oocyte fate determination; negative regulation of nuclear-transcribed mRNA catabolic process, nonsense-mediated decay; P granule; negative regulation of gene expression; regulation of germ cell proliferation; protein binding; positive regulation of oocyte development; single-stranded RNA binding; negative regulation of translation; cytoplasm; multicellular organism developme…	protein_coding
WBGene00011916	T22C1.5	I:7940914-7941973	N2	rnp-6	OK	71.5758	53.34	-0.424254	-1.66141	0.0037	0.027775	yes			protein_coding
WBGene00014115	gld-4	I:9118114-9121761	N2	rnp-6	OK	39.5744	51.3025	0.374459	1.63535	0.00435	0.0315234	yes	GO:0005737; GO:0005844; GO:0016779; GO:0043186; GO:0004652; GO:0000166; GO:0016740; GO:0006378; GO:0051321; GO:0048471; GO:0046872; GO:0007275; GO:0005524; GO:0006397	polynucleotide adenylyltransferase activity; cytoplasm; mRNA processing; nucleotidyltransferase activity; polysome; P granule; perinuclear region of cytoplasm; ATP binding; meiotic cell cycle; transferase activity; multicellular organism development; nucleotide binding; mRNA polyadenylation; metal ion binding	protein_coding
WBGene00007533	cbl-1	I:9327856-9330930	N2	rnp-6	OK	15.0863	6.24419	-1.27265	-3.926	5e-05	0.000725861	yes	GO:0005737; GO:0019346; GO:0004121; GO:0016829; GO:0071266; GO:0003824; GO:0019343; GO:0030170; GO:0004123; GO:0003962	cysteine biosynthetic process via cystathionine; pyridoxal phosphate binding; lyase activity; cytoplasm; 'de novo' L-methionine biosynthetic process; cystathionine beta-lyase activity; cystathionine gamma-lyase activity; cystathionine gamma-synthase activity; transsulfuration; catalytic activity	protein_coding
WBGene00007642	C17E4.2	I:9412313-9413223	N2	rnp-6	OK	15.4981	10.5488	-0.555011	-1.60456	0.00655	0.043217	yes			protein_coding
WBGene00219313	C17E4.20	I:9414455-9416702	N2	rnp-6	OK	36.4673	25.7801	-0.500346	-1.96987	0.00065	0.0068644	yes			protein_coding
WBGene00006681	twk-29	I:9463759-9468917	N2	rnp-6	OK	1.38364	0.703979	-0.974861	-1.75313	0.00395	0.0292687	yes	GO:0005267; GO:0006810; GO:0071805; GO:0016021; GO:0016020; GO:0030322; GO:0005887; GO:0022841; GO:0006811	integral component of plasma membrane; potassium ion transmembrane transport; ion transport; potassium channel activity; stabilization of membrane potential; membrane; potassium ion leak channel activity; integral component of membrane; transport	protein_coding
WBGene00011494	T05F1.9	I:9645698-9649218	N2	rnp-6	OK	2.46329	0.587192	-2.06868	-2.07045	0.00575	0.0390509	yes			protein_coding
WBGene00009162	F26E4.7	I:9774073-9779541	N2	rnp-6	OK	5.64829	3.94259	-0.518669	-1.53701	0.00705	0.0457217	yes	GO:0007155; ; GO:0030198; GO:0005578; GO:0005615	cell adhesion; extracellular space; proteinaceous extracellular matrix; extracellular matrix organization;	protein_coding
WBGene00023415	F16C3.3	I:10155283-10158497	N2	rnp-6	OK	2.45589	1.37859	-0.833045	-1.66576	0.00555	0.0380172	yes			protein_coding
WBGene00013895	ZC434.9	I:10356250-10360890	N2	rnp-6	OK	8.33484	5.0433	-0.724787	-2.19705	0.00025	0.00303907	yes	GO:0016787; GO:0005615; GO:0004181; GO:0004180; GO:0008270; GO:0006508; GO:0008233; GO:0046872; GO:0008237	carboxypeptidase activity; extracellular space; hydrolase activity; zinc ion binding; peptidase activity; metal ion binding; metallopeptidase activity; proteolysis; metallocarboxypeptidase activity	protein_coding
WBGene00009743	sptf-1	I:10366620-10371694	N2	rnp-6	OK	8.5556	4.3436	-0.977976	-2.53856	5e-05	0.000725861	yes	GO:0005634; GO:0006357; GO:0000981; GO:0003676	regulation of transcription from RNA polymerase II promoter; nucleic acid binding; nucleus; RNA polymerase II transcription factor activity, sequence-specific DNA binding	protein_coding
WBGene00013716	Y106G6H.1	I:10429671-10432336	N2	rnp-6	OK	21.0118	10.4448	-1.00841	-3.38339	5e-05	0.000725861	yes			protein_coding
WBGene00002248	lam-3	I:10608465-10621428	N2	rnp-6	OK	12.8467	9.99293	-0.362422	-1.5435	0.00665	0.0436819	yes	GO:0005604; GO:0005515	protein binding; basement membrane	protein_coding
WBGene00015229	fbxa-125	I:10646761-10647777	N2	rnp-6	OK	1.71706	0.761898	-1.17227	-1.76237	0.0045	0.0323767	yes			protein_coding
WBGene00001432	fkb-7	I:10667954-10671016	N2	rnp-6	OK	6.63236	4.1403	-0.679788	-1.66329	0.0046	0.032894	yes	GO:0005737; GO:0000413; GO:0006457; GO:0016853; GO:0005528; GO:0003755; GO:0061077	peptidyl-prolyl cis-trans isomerase activity; protein peptidyl-prolyl isomerization; cytoplasm; protein folding; isomerase activity; chaperone-mediated protein folding; FK506 binding	protein_coding
WBGene00000912	daf-16	I:10750342-10776700	N2	rnp-6	OK	19.2155	26.8581	0.483085	1.89717	0.00105	0.0101691	yes	; GO:0033613; GO:0008582; GO:0007614; GO:0030154; GO:0019899; GO:0045887; GO:0010628; GO:0042594; GO:0003677; GO:0050829; GO:0009653; GO:0061065; GO:0007275; GO:0061066; GO:0005737; GO:0043565; GO:0000122; GO:0005634; GO:1990381; GO:0010564; GO:0043065; GO:1900075; GO:0034605; GO:0071889; GO:0017151; GO:0010468; GO:0000981; GO:0000977; GO:0040024; GO:0008286; GO:0007568; GO:0045087; GO:0010286; G…	; positive regulation of adaptive immune response; RNA polymerase II transcription factor activity, sequence-specific DNA binding; regulation of DNA-templated transcription in response to stress; cytosol; cytoplasm; activating transcription factor binding; response to starvation; anatomical structure morphogenesis; 14-3-3 protein binding; defense response to Gram-positive bacterium; response to o…	protein_coding
WBGene00016458	C35E7.6	I:10817359-10819109	N2	rnp-6	OK	20.3573	14.3076	-0.508765	-1.68777	0.00305	0.0238181	yes	GO:0005737	cytoplasm	protein_coding
WBGene00003977	pes-2.1	I:11355235-11356370	N2	rnp-6	OK	0.3363	5.63369	4.06626	5.45236	5e-05	0.000725861	yes	GO:0005515	protein binding	protein_coding
WBGene00007766	C27C7.1	I:11439286-11440710	N2	rnp-6	OK	31.3077	20.7324	-0.594631	-2.0876	0.00025	0.00303907	yes			protein_coding
WBGene00014820	R09B3.6	I:11905956-11907484	N2	rnp-6	OK	3.80103	6.27262	0.722678	1.90639	0.001	0.0097769	yes
WBGene00011059	R06C1.4	I:11930724-11931759	N2	rnp-6	OK	48.5956	79.5818	0.711612	2.39114	5e-05	0.000725861	yes	GO:0005689; GO:0000398; GO:0003723; GO:0003676	RNA binding; U12-type spliceosomal complex; mRNA splicing, via spliceosome; nucleic acid binding	protein_coding
WBGene00013135	rga-2	I:11979439-11985655	N2	rnp-6	OK	3.57498	2.37603	-0.589378	-1.58093	0.0059	0.0398386	yes	GO:0005096; GO:0007165; GO:0005515; GO:0043547	protein binding; signal transduction; GTPase activator activity; positive regulation of GTPase activity	protein_coding
WBGene00219984	F58D5.12	I:12043824-12043914	N2	rnp-6	OK	0	146.756	inf		0.00145	0.013173	yes
WBGene00008784	F14B6.3	I:12230417-12232308	N2	rnp-6	OK	15.1042	10.8328	-0.479548	-1.52748	0.0072	0.0464409	yes			protein_coding
WBGene00011660	T09E11.11	I:12344166-12345702	N2	rnp-6	OK	3.67666	1.96841	-0.901366	-1.71288	0.0037	0.027775	yes
WBGene00004196	prx-11	I:12971613-12972259	N2	rnp-6	OK	49.7637	26.734	-0.896419	-2.94849	5e-05	0.000725861	yes	GO:0005779; GO:0016559; GO:0044375; GO:0045087; GO:0031231; GO:0050829	innate immune response; peroxisome fission; intrinsic component of peroxisomal membrane; regulation of peroxisome size; integral component of peroxisomal membrane; defense response to Gram-negative bacterium	protein_coding
WBGene00008132	gale-1	I:12975183-12978781	N2	rnp-6	OK	112.811	70.5158	-0.677888	-2.97973	5e-05	0.000725861	yes	GO:0016857; GO:0040026; GO:0042335; GO:0005975; GO:0016853; GO:1900102; GO:0002119; GO:0035262; GO:0006012; GO:0050830; GO:0009792; GO:0003974; GO:0003978; GO:1903354	regulation of distal tip cell migration; galactose metabolic process; nematode larval development; embryo development ending in birth or egg hatching; UDP-glucose 4-epimerase activity; carbohydrate metabolic process; positive regulation of vulval development; isomerase activity; negative regulation of endoplasmic reticulum unfolded protein response; gonad morphogenesis; racemase and epimerase act…	protein_coding
WBGene00009061	F22G12.1	I:13139131-13141894	N2	rnp-6	OK	0.335355	0.937627	1.48333	1.89067	0.0034	0.0259387	yes			protein_coding
WBGene00009065	F22G12.5	I:13162498-13182808	N2	rnp-6	OK	13.7211	18.2947	0.415028	1.83828	0.0016	0.014229	yes	GO:0007264; GO:0005085; GO:0043547; GO:0005622	small GTPase mediated signal transduction; intracellular; guanyl-nucleotide exchange factor activity; positive regulation of GTPase activity	protein_coding
WBGene00011432	sdz-30	I:13306204-13308786	N2	rnp-6	OK	25.4084	14.3279	-0.826475	-3.06251	5e-05	0.000725861	yes	GO:0005737	cytoplasm	protein_coding
WBGene00003585	ndx-8	I:13503044-13507054	N2	rnp-6	OK	3.67826	1.47789	-1.31548	-2.403	0.0005	0.00551085	yes	GO:0016787; GO:0016289; GO:0005778; GO:0015938; GO:0016021; GO:0016020; GO:0005777; GO:0047994; GO:0043229; GO:0004778; GO:0003986; GO:0046872	hydroxymethylglutaryl-CoA hydrolase activity; CoA hydrolase activity; hydrolase activity; membrane; coenzyme A catabolic process; succinyl-CoA hydrolase activity; intracellular organelle; metal ion binding; peroxisome; acetyl-CoA hydrolase activity; integral component of membrane; peroxisomal membrane	protein_coding
WBGene00013508	Y71A12B.11	I:13978429-13980148	N2	rnp-6	OK	29.7531	20.311	-0.550783	-1.86216	0.00155	0.013881	yes	GO:0016021; GO:0016020	integral component of membrane; membrane	protein_coding
WBGene00045077	Y71A12B.12	I:13997362-14008471	N2	rnp-6	OK	8.98898	13.5665	0.593818	1.5275	0.00795	0.0499487	yes
WBGene00013509	Y71A12B.12	I:13997362-14008471	N2	rnp-6	OK	8.98898	13.5665	0.593818	1.5275	0.00795	0.0499487	yes	; GO:0005488	; binding	protein_coding
WBGene00195916	Y71A12B.12	I:13997362-14008471	N2	rnp-6	OK	8.98898	13.5665	0.593818	1.5275	0.00795	0.0499487	yes
WBGene00007989	fipr-22	I:14155496-14156334	N2	rnp-6	OK	3.89205	7.80113	1.00315	2.20214	0.0005	0.00551085	yes			protein_coding
WBGene00007992	fipr-24	I:14157627-14158078	N2	rnp-6	OK	2.16956	11.911	2.45682	4.09865	5e-05	0.000725861	yes			protein_coding
WBGene00009863	F49B2.3	I:14311008-14312871	N2	rnp-6	OK	1.27488	0.537166	-1.24692	-1.72305	0.00725	0.0466777	yes	GO:0016021; GO:0016020	integral component of membrane; membrane	protein_coding
WBGene00004237	ptr-23	I:14909239-14913073	N2	rnp-6	OK	11.2506	8.16587	-0.462323	-1.68302	0.0038	0.0283741	yes	GO:0045138; GO:0016021; GO:0016020; GO:0006897; GO:0018996	endocytosis; molting cycle, collagen and cuticulin-based cuticle; integral component of membrane; nematode male tail tip morphogenesis; membrane	protein_coding
WBGene00013970	klu-1	I:14975418-14980586	N2	rnp-6	OK	0.745522	1.3162	0.820057	1.54806	0.0073	0.0469136	yes	GO:0003676	nucleic acid binding	protein_coding
WBGene00013969	tep-1	I:14993820-15001680	N2	rnp-6	OK	9.41064	13.4334	0.513464	1.88897	0.00085	0.00858204	yes	GO:0010951; GO:0005576; GO:0005615; GO:0004866	extracellular region; extracellular space; endopeptidase inhibitor activity; negative regulation of endopeptidase activity	protein_coding
WBGene00044997	tep-1	I:14993820-15001680	N2	rnp-6	OK	9.41064	13.4334	0.513464	1.88897	0.00085	0.00858204	yes
WBGene00004677	WBGene00004677	I:15060298-15061159	N2	rnp-6	OK	196.324	112.268	-0.806286	-3.44602	5e-05	0.000725861	yes
WBGene00004513	rrn-1.2	I:15069279-15071033	N2	rnp-6	OK	7.09838	11.0494	0.638408	1.94143	0.001	0.0097769	yes
WBGene00189949	Y48G1C.13	I:93030-95367	N2	rnp-6	OK	33.5444	5.37949	-2.64053	-1.87122	0.0077	0.0487669	yes	GO:0006030; GO:0005576; GO:0008061	extracellular region; chitin metabolic process; chitin binding	protein_coding
WBGene00021664	Y48G1BL.5	I:219734-221575	N2	rnp-6	OK	3.70667	6.63882	0.840802	2.04413	0.0005	0.00551085	yes
WBGene00021028	W04C9.6	I:484125-487990	N2	rnp-6	OK	1.07722	0.451339	-1.25503	-1.91237	0.00325	0.0250162	yes	GO:0022857; GO:0016021; GO:0016020; GO:0006820; GO:0055085	anion transport; transmembrane transport; transmembrane transporter activity; integral component of membrane; membrane	protein_coding
WBGene00022029	Y65B4A.6	I:631054-636350	N2	rnp-6	OK	87.6242	135.458	0.62844	2.77282	5e-05	0.000725861	yes	GO:0005737; GO:0016787; GO:0010501; GO:0008380; GO:0005730; GO:0071013; GO:0004004; GO:0000166; GO:0003676; GO:0004386; GO:0010468; GO:0005524	nucleic acid binding; nucleolus; ATP-dependent RNA helicase activity; catalytic step 2 spliceosome; hydrolase activity; cytoplasm; RNA splicing; regulation of gene expression; ATP binding; helicase activity; nucleotide binding; RNA secondary structure unwinding	protein_coding
WBGene00021209	hgap-1	I:700273-715850	N2	rnp-6	OK	12.2516	18.8027	0.617974	2.5448	5e-05	0.000725861	yes	GO:0005737; GO:0051056; GO:0043547; GO:0005096; GO:0005488; GO:0008340	cytoplasm; binding; positive regulation of GTPase activity; GTPase activator activity; regulation of small GTPase mediated signal transduction; determination of adult lifespan	protein_coding
WBGene00022370	Y92H12BR.4	I:1427226-1433695	N2	rnp-6	OK	1.58303	0.677895	-1.22355	-1.99652	0.00165	0.0145952	yes
WBGene00021474	dot-1.1	I:2382951-2401488	N2	rnp-6	OK	17.8988	24.2335	0.437137	1.81266	0.00165	0.0145952	yes	GO:0034729; GO:0006348; GO:0000077; GO:0000781; GO:0051726; GO:0005634; GO:0006281; GO:2000677; GO:0016740; GO:0031151; GO:0018024; GO:0008168; GO:0032259; GO:0016569	DNA damage checkpoint; chromatin silencing at telomere; methylation; covalent chromatin modification; transferase activity; histone methyltransferase activity (H3-K79 specific); regulation of transcription regulatory region DNA binding; methyltransferase activity; regulation of cell cycle; nucleus; histone H3-K79 methylation; chromosome, telomeric region; DNA repair; histone-lysine N-methyltransf…	protein_coding
WBGene00045387	K09H9.8	I:3138538-3140601	N2	rnp-6	OK	9.58291	5.5401	-0.790553	-1.90478	0.00095	0.00937283	yes	GO:0016021; GO:0016020	integral component of membrane; membrane	protein_coding
WBGene00019598	K09H9.7	I:3150408-3152003	N2	rnp-6	OK	4.2572	9.95768	1.2259	3.11669	5e-05	0.000725861	yes	GO:0003676	nucleic acid binding	protein_coding
WBGene00021035	W05F2.3	I:3367638-3368552	N2	rnp-6	OK	238.43	320.613	0.427269	1.9414	0.0009	0.00897191	yes	GO:0016021; GO:0016020	integral component of membrane; membrane	protein_coding
WBGene00004389	rnp-6	I:3533993-3546904	N2	rnp-6	OK	77.8873	110.142	0.499906	1.81554	0.0012	0.0113201	yes	GO:0003723; GO:0003676	RNA binding; nucleic acid binding	protein_coding
WBGene00003060	lpd-3	I:3564063-3600677	N2	rnp-6	OK	24.7095	32.0559	0.375526	1.69529	0.00255	0.0206975	yes	GO:0016021; GO:0016020	integral component of membrane; membrane	protein_coding
WBGene00000368	ccb-1	I:3641704-3647009	N2	rnp-6	OK	11.6994	5.7834	-1.01644	-3.21983	5e-05	0.000725861	yes	GO:0051924; GO:0040017; GO:0008331; GO:0048786; GO:0070588; GO:0007528; GO:0005891; GO:0061199; GO:0005515; GO:0007268; GO:1901385; GO:0005245	regulation of calcium ion transport; neuromuscular junction development; voltage-gated calcium channel activity; protein binding; presynaptic active zone; calcium ion transmembrane transport; positive regulation of locomotion; chemical synaptic transmission; regulation of voltage-gated calcium channel activity; striated muscle contraction involved in embryonic body morphogenesis; voltage-gated ca…	protein_coding
WBGene00004890	smp-2	I:3667123-3671700	N2	rnp-6	OK	6.81684	4.74044	-0.524084	-1.56468	0.0067	0.0439419	yes	GO:0016021; GO:0016020; GO:0005887; GO:0005515; GO:0090597	integral component of plasma membrane; protein binding; integral component of membrane; nematode male tail mating organ morphogenesis; membrane	protein_coding
WBGene00219725	linc-63	I:3870641-3871267	N2	rnp-6	OK	3.57814	6.30281	0.816785	1.60706	0.00625	0.0416482	yes
WBGene00020191	clec-53	I:3871470-3873416	N2	rnp-6	OK	5.0353	2.49053	-1.01563	-2.23411	0.0002	0.00250605	yes	GO:0004888; GO:0007165; GO:0005887; GO:0030246	integral component of plasma membrane; signal transduction; carbohydrate binding; transmembrane signaling receptor activity	protein_coding
WBGene00020626	T20F5.4	I:3912636-3915458	N2	rnp-6	OK	6.0384	3.05087	-0.984943	-2.4285	5e-05	0.000725861	yes			protein_coding
WBGene00002696	let-504	I:4129563-4132292	N2	rnp-6	OK	48.0937	62.5842	0.379949	1.61364	0.00455	0.0326223	yes	GO:0007219; GO:0003682; GO:0045892	Notch signaling pathway; chromatin binding; negative regulation of transcription, DNA-templated	protein_coding
WBGene00022471	Y119C1B.5	I:4511439-4516083	N2	rnp-6	OK	12.6764	17.9438	0.50134	1.88341	0.00095	0.00937283	yes	GO:0043161; GO:0016021; GO:0016020; GO:0042787; GO:0008270; GO:0005515; GO:0046872; GO:0061630; GO:0000209	ubiquitin protein ligase activity; protein binding; zinc ion binding; metal ion binding; protein ubiquitination involved in ubiquitin-dependent protein catabolic process; membrane; proteasome-mediated ubiquitin-dependent protein catabolic process; integral component of membrane; protein polyubiquitination	protein_coding
WBGene00017004	nrd-1	I:4597889-4602666	N2	rnp-6	OK	30.3157	38.8286	0.357056	1.57495	0.00555	0.0380172	yes	GO:0003723; GO:0003676	RNA binding; nucleic acid binding	protein_coding
WBGene00015010	ptps-1	I:4652142-4652906	N2	rnp-6	OK	31.106	18.1379	-0.778186	-2.1651	0.00025	0.00303907	yes	GO:0006729; GO:0016829; GO:0046872; GO:0003874; GO:0042802	6-pyruvoyltetrahydropterin synthase activity; tetrahydrobiopterin biosynthetic process; metal ion binding; identical protein binding; lyase activity	protein_coding
WBGene00206362	B0041.11	I:4661114-4662199	N2	rnp-6	OK	2.19447	4.10283	0.902745	1.5194	0.00775	0.0489842	yes			protein_coding
WBGene00007053	chd-7	I:4685867-4698575	N2	rnp-6	OK	18.6216	24.1381	0.374334	1.68792	0.00305	0.0238181	yes	GO:0005634; GO:0004386; GO:0005515; GO:0005524; GO:0016817	helicase activity; protein binding; hydrolase activity, acting on acid anhydrides; nucleus; ATP binding	protein_coding
WBGene00021113	gsp-3	I:4709316-4710708	N2	rnp-6	OK	0.150757	0.826482	2.45476	2.39146	0.00325	0.0250162	yes	GO:0005737; GO:0016787; GO:0042995; GO:0018991; GO:0000003; GO:0031143; GO:0006470; GO:0030317; GO:0030154; GO:0000790; GO:0004721; GO:0007283; GO:0000785; GO:0031272; GO:0046872; GO:0005694; GO:0007060	nuclear chromatin; chromatin; regulation of pseudopodium assembly; pseudopodium; hydrolase activity; cytoplasm; male meiosis chromosome segregation; flagellated sperm motility; cell differentiation; oviposition; phosphoprotein phosphatase activity; metal ion binding; reproduction; protein dephosphorylation; cell projection; spermatogenesis; chromosome	protein_coding
WBGene00019013	tofu-4	I:4821932-4826633	N2	rnp-6	OK	19.6482	26.5328	0.433374	1.59538	0.00515	0.0358984	yes			protein_coding
WBGene00001117	dyf-1	I:4989554-4994661	N2	rnp-6	OK	1.27434	0.671725	-0.923809	-1.75935	0.0031	0.0241392	yes	; GO:0030992; GO:0018095; GO:0060271; GO:0036064; GO:0030030; GO:0005215; GO:0042073; GO:0005879; GO:0005515; GO:0005929; GO:0042995	; transporter activity; cell projection; ciliary basal body; axonemal microtubule; intraciliary transport particle B; protein polyglutamylation; protein binding; cell projection organization; cilium assembly; intraciliary transport; cilium	protein_coding
WBGene00002717	let-526	I:5300994-5317392	N2	rnp-6	OK	23.1705	38.7237	0.740929	3.30584	5e-05	0.000725861	yes	GO:0006338; GO:0005634; GO:0002119; GO:0045944; GO:0003677; GO:0090544	nematode larval development; chromatin remodeling; DNA binding; BAF-type complex; nucleus; positive regulation of transcription from RNA polymerase II promoter	protein_coding
WBGene00000150	apm-1	I:5342177-5344724	N2	rnp-6	OK	13.8256	9.39007	-0.558131	-1.81776	0.00215	0.018108	yes	GO:0045176; GO:0016192; GO:0006886; GO:0006810; GO:0030131; GO:0015031; GO:0045087	innate immune response; apical protein localization; vesicle-mediated transport; clathrin adaptor complex; protein transport; intracellular protein transport; transport	protein_coding
WBGene00001067	dpy-5	I:5432157-5433054	N2	rnp-6	OK	0.194346	1.23258	2.66499	2.54218	0.00105	0.0101691	yes	GO:0040002; GO:0040014; GO:0042329; GO:0042338; GO:0040032; GO:0060102; GO:0042302; GO:0005581	collagen and cuticulin-based cuticle development; regulation of multicellular organism growth; cuticle development involved in collagen and cuticulin-based cuticle molting cycle; post-embryonic body morphogenesis; collagen and cuticulin-based cuticle extracellular matrix; structural constituent of collagen and cuticulin-based cuticle; structural constituent of cuticle; collagen trimer	protein_coding
WBGene00006919	vha-10	I:5609309-5610270	N2	rnp-6	OK	232.95	170.608	-0.449341	-1.96172	0.00055	0.00597832	yes	GO:0016471; GO:0015992; GO:1902600; GO:0006811; GO:0006810; GO:0015078; GO:0012501; GO:0016820; GO:0043068; GO:0006754; GO:0055085	hydrogen ion transmembrane transport; ATP biosynthetic process; positive regulation of programmed cell death; transmembrane transport; ion transport; vacuolar proton-transporting V-type ATPase complex; hydrolase activity, acting on acid anhydrides, catalyzing transmembrane movement of substances; proton transport; programmed cell death; transport; hydrogen ion transmembrane transporter activity	protein_coding
WBGene00044414	C06A5.12	I:6004652-6007595	N2	rnp-6	OK	7.77213	2.7993	-1.47324	-2.26318	0.00135	0.0124346	yes	GO:0016021; GO:0016020	integral component of membrane; membrane	protein_coding
WBGene00022751	ZK484.5	I:6087368-6087764	N2	rnp-6	OK	1.89379	7.13347	1.91333	2.8237	0.0001	0.00135972	yes			protein_coding
WBGene00020382	T09B4.8	I:6164714-6166539	N2	rnp-6	OK	29.6699	20.7659	-0.514779	-1.90705	0.00125	0.0117015	yes	GO:0008453; GO:0008483; GO:0005739; GO:0003824; GO:0030170; GO:0042802	pyridoxal phosphate binding; catalytic activity; identical protein binding; transaminase activity; mitochondrion; alanine-glyoxylate transaminase activity	protein_coding
WBGene00022592	klu-2	I:6386147-6392524	N2	rnp-6	OK	5.69371	3.58579	-0.667081	-1.79026	0.00215	0.018108	yes	GO:0003676	nucleic acid binding	protein_coding
WBGene00017065	D2092.4	I:6612186-6615978	N2	rnp-6	OK	10.0675	14.0198	0.47775	1.54645	0.00775	0.0489842	yes	GO:0030016; GO:0016021; GO:0016020; GO:0045454	cell redox homeostasis; myofibril; integral component of membrane; membrane	protein_coding
WBGene00002258	lbp-6	I:6724916-6729376	N2	rnp-6	OK	634.524	872.631	0.459698	2.10686	0.0002	0.00250605	yes	GO:0005215; GO:0006810; GO:0008289; GO:0005515	transporter activity; lipid binding; transport; protein binding	protein_coding
WBGene00006819	unc-87	I:6760431-6767797	N2	rnp-6	OK	132.352	180.892	0.450752	2.02238	0.0003	0.00356315	yes	; GO:0001725; GO:0031034; GO:0031032; GO:0051017; GO:0031674; GO:0017022; GO:1904111; GO:0051015; GO:0005515; GO:0005865; GO:0042642; GO:0042643; GO:1904113	actin filament binding; ; actomyosin, actin portion; stress fiber; myosin filament assembly; protein binding; negative regulation of plus-end directed microfilament motor activity; myosin binding; striated muscle thin filament; I band; actomyosin, myosin complex part; negative regulation of muscle filament sliding; actomyosin structure organization; actin filament bundle assembly	protein_coding
WBGene00016492	C37A2.6	I:6788082-6788986	N2	rnp-6	OK	6.61331	4.03386	-0.713213	-1.60271	0.00775	0.0489842	yes	GO:0008168; GO:0016740; GO:0032259	transferase activity; methyltransferase activity; methylation	protein_coding
WBGene00219733	linc-53	I:6860394-6861997	N2	rnp-6	OK	1.38689	0	-inf		0.0076	0.0482968	yes
WBGene00016744	bbs-9	I:6917749-6922955	N2	rnp-6	OK	0.513242	0.184597	-1.47526	-1.95257	0.00395	0.0292687	yes	GO:0036064; GO:0006810; GO:0060271; GO:0030030; GO:0016020; GO:0005515; GO:0015031; GO:0034464	protein binding; ciliary basal body; membrane; BBSome; protein transport; cell projection organization; cilium assembly; transport	protein_coding
WBGene00044988	W01A8.2,W01A8.8	I:7053687-7056875	N2	rnp-6	OK	49.8737	35.8399	-0.476712	-1.5903	0.0054	0.0372683	yes	GO:0005179; GO:0005576	extracellular region; hormone activity	protein_coding
WBGene00012164	W01A8.2,W01A8.8	I:7053687-7056875	N2	rnp-6	OK	49.8737	35.8399	-0.476712	-1.5903	0.0054	0.0372683	yes			protein_coding
WBGene00009050	F22D6.2	I:7079910-7082020	N2	rnp-6	OK	184.75	245.506	0.410182	1.88594	0.00125	0.0117015	yes	GO:0005634; GO:0046872; GO:0008270; GO:0003677	DNA binding; nucleus; metal ion binding; zinc ion binding	protein_coding
WBGene00002348	myo-1	I:7258920-7267079	N2	rnp-6	OK	13.8071	26.726	0.952837	4.08071	5e-05	0.000725861	yes	GO:0005737; GO:0030016; GO:0032982; GO:0006936; GO:0043050; GO:0000166; GO:0003779; GO:0008307; GO:0016459; GO:0048017; GO:0005863; GO:0003774; GO:0005524	actin binding; motor activity; cytoplasm; striated muscle myosin thick filament; structural constituent of muscle; muscle contraction; pharyngeal pumping; inositol lipid-mediated signaling; ATP binding; myosin complex; myosin filament; nucleotide binding; myofibril	protein_coding
WBGene00006754	unc-15	I:7376603-7383197	N2	rnp-6	OK	83.2838	129.916	0.641468	2.92002	5e-05	0.000725861	yes	GO:0005737; GO:0040011; GO:0032982; ; GO:0008092; GO:0030241; GO:0031672; GO:0051493; GO:0017124; GO:0060279; GO:0019901; GO:0016459; GO:0003774; GO:0060298	; positive regulation of sarcomere organization; skeletal muscle myosin thick filament assembly; protein kinase binding; myosin complex; motor activity; cytoplasm; SH3 domain binding; positive regulation of ovulation; A band; cytoskeletal protein binding; locomotion; myosin filament; regulation of cytoskeleton organization	protein_coding
WBGene00007598	C15A11.4	I:7398823-7401023	N2	rnp-6	OK	2.32138	1.34228	-0.790298	-1.66422	0.0051	0.0356206	yes	GO:0016021; GO:0016020	integral component of membrane; membrane	protein_coding
WBGene00012138	T28F4.3	I:7484056-7486040	N2	rnp-6	OK	0.481962	0.151887	-1.66593	-1.83875	0.0074	0.0473757	yes	GO:0016787; GO:0016791; GO:0016311; GO:0006470; GO:0004725; GO:0004721; GO:0035335	protein tyrosine phosphatase activity; peptidyl-tyrosine dephosphorylation; phosphatase activity; hydrolase activity; phosphoprotein phosphatase activity; dephosphorylation; protein dephosphorylation	protein_coding
WBGene00012139	T28F4.4	I:7486576-7490174	N2	rnp-6	OK	16.7601	7.10491	-1.23815	-4.30288	5e-05	0.000725861	yes	; GO:0005488	; binding	protein_coding
WBGene00007743	C26C6.9	I:7514092-7515108	N2	rnp-6	OK	17.9392	11.3581	-0.659399	-1.87761	0.00155	0.013881	yes	GO:0016021; GO:0016020; GO:0006810	integral component of membrane; transport; membrane	protein_coding
WBGene00011231	R11A5.3	I:7862841-7863553	N2	rnp-6	OK	33.432	21.3568	-0.646537	-1.93938	0.00105	0.0101691	yes			protein_coding
WBGene00000485	che-3	I:8062010-8081671	N2	rnp-6	OK	0.770018	0.484093	-0.669609	-1.84258	0.00195	0.0167396	yes	GO:0008104; GO:0007635; GO:0030030; GO:0097730; GO:0016887; GO:0005929; GO:0030286; GO:0005874; GO:0007275; GO:0061066; GO:0005856; GO:0016020; GO:0008569; GO:0045505; GO:0000166; GO:0060170; GO:0051959; GO:0003774; GO:0003777; GO:0005737; GO:0060271; GO:0005886; GO:0042995; GO:0030512; GO:0045503; GO:0043053; GO:0007018; GO:0005524; GO:1905515	non-motile cilium; protein localization; motor activity; cytoplasm; dauer entry; cytoskeleton; nucleotide binding; cell projection; positive regulation of dauer larval development; plasma membrane; microtubule; chemosensory behavior; ATP binding; membrane; cilium assembly; ATPase activity; microtubule motor activity; microtubule-based movement; dynein intermediate chain binding; ciliary membrane;…	protein_coding
WBGene00000639	col-63	I:8243692-8244961	N2	rnp-6	OK	0.248467	1.13347	2.18962	2.6541	0.00035	0.00407043	yes	GO:0016021; GO:0016020; GO:0005581; GO:0042302	structural constituent of cuticle; collagen trimer; integral component of membrane; membrane	protein_coding
WBGene00009923	F52B5.7	I:8313227-8315344	N2	rnp-6	OK	11.351	7.61524	-0.575862	-1.61595	0.005	0.035079	yes	GO:0003676	nucleic acid binding	protein_coding
WBGene00010495	K02B12.2	I:8511628-8512407	N2	rnp-6	OK	23.3871	14.6173	-0.678035	-2.00662	0.00055	0.00597832	yes			protein_coding
WBGene00009460	ubr-5	I:8828043-8838719	N2	rnp-6	OK	70.5463	88.7777	0.331627	1.53507	0.00665	0.0436819	yes	GO:0005737; GO:0061630; GO:0006974; GO:0016567; GO:0016740; GO:0043130; GO:0004842; GO:0008270; GO:0016874; GO:0005488	ubiquitin protein ligase activity; cellular response to DNA damage stimulus; transferase activity; binding; zinc ion binding; ubiquitin binding; ubiquitin-protein transferase activity; ligase activity; cytoplasm; protein ubiquitination	protein_coding
WBGene00010135	F55H12.4	I:8893307-8894137	N2	rnp-6	OK	22.4557	32.0258	0.512156	1.65854	0.0035	0.0265526	yes			protein_coding
WBGene00009343	F32H2.6	I:8994001-8999564	N2	rnp-6	OK	3.03647	0.905977	-1.74485	-1.97059	0.00755	0.0480515	yes	GO:0003824; GO:0008152	metabolic process; catalytic activity	protein_coding
WBGene00007855	C31H5.4	I:9042273-9042599	N2	rnp-6	OK	150.351	109.328	-0.459672	-1.56195	0.00625	0.0416482	yes			protein_coding
WBGene00007856	C31H5.5	I:9048190-9049332	N2	rnp-6	OK	4.5048	2.58852	-0.799339	-1.59065	0.00765	0.048545	yes			protein_coding
WBGene00010856	M04C9.1	I:9350273-9352700	N2	rnp-6	OK	2.36843	1.08937	-1.12044	-1.84574	0.00355	0.0268498	yes	; GO:0006508	; proteolysis	protein_coding
WBGene00044680	F30A10.13	I:9478466-9479091	N2	rnp-6	OK	20.4566	10.6542	-0.941151	-2.03477	0.00115	0.01096	yes			protein_coding
WBGene00009261	F30A10.2	I:9479107-9480678	N2	rnp-6	OK	1.61366	0.435628	-1.88917	-2.59636	0.0003	0.00356315	yes			protein_coding
WBGene00007301	C04F12.7	I:9695707-9696762	N2	rnp-6	OK	1.87519	4.30563	1.19919	2.17081	0.0004	0.00457121	yes	GO:0016021; GO:0016020	integral component of membrane; membrane	protein_coding
WBGene00009160	F26E4.4,F26E4.5	I:9768883-9772565	N2	rnp-6	OK	40.1937	56.3048	0.486288	1.98131	0.00065	0.0068644	yes	GO:0042127; GO:0006468; GO:0030154; GO:0038083; GO:0016310; GO:0045087; GO:0016301; GO:0000166; GO:0016740; GO:0004715; GO:0004713; GO:0004672; GO:0007169; GO:0005102; GO:0016477; GO:0031234; GO:0005524	innate immune response; peptidyl-tyrosine autophosphorylation; cell migration; protein phosphorylation; transferase activity; extrinsic component of cytoplasmic side of plasma membrane; non-membrane spanning protein tyrosine kinase activity; phosphorylation; cell differentiation; protein kinase activity; kinase activity; protein tyrosine kinase activity; receptor binding; ATP binding; regulation …	protein_coding
WBGene00009159	F26E4.4,F26E4.5	I:9768883-9772565	N2	rnp-6	OK	40.1937	56.3048	0.486288	1.98131	0.00065	0.0068644	yes	GO:0003899; GO:0005666; GO:0006383; GO:0003677	DNA-directed RNA polymerase III complex; DNA-directed 5'-3' RNA polymerase activity; DNA binding; transcription from RNA polymerase III promoter	protein_coding
WBGene00009408	F35C12.3	I:9808903-9823448	N2	rnp-6	OK	3.2935	6.60662	1.00429	1.69107	0.0046	0.032894	yes			protein_coding
WBGene00013694	Y106G6A.1	I:9936124-9938300	N2	rnp-6	OK	26.4944	18.6056	-0.509953	-1.87668	0.00085	0.00858204	yes	GO:0006468; GO:0016529; GO:0005524; GO:0004672	protein kinase activity; sarcoplasmic reticulum; ATP binding; protein phosphorylation	protein_coding
WBGene00220087	T23D8.13	I:9994306-9994475	N2	rnp-6	OK	0	2.76991	inf		0.00635	0.042158	yes
WBGene00008886	F16C3.2	I:10150283-10155098	N2	rnp-6	OK	22.0698	14.4384	-0.612162	-2.00361	0.00055	0.00597832	yes			protein_coding
WBGene00009119	ndk-1	I:10553111-10553913	N2	rnp-6	OK	1880.01	2474.62	0.396465	1.81442	0.00175	0.015327	yes	GO:0030334; GO:0006165; GO:0006228; GO:0016310; GO:0016301; GO:0006183; GO:0000166; GO:0043410; GO:0016740; GO:0006241; GO:0004550; GO:0042802; GO:0005515; GO:0005622; GO:1901074; GO:0005524	CTP biosynthetic process; regulation of cell migration; protein binding; identical protein binding; intracellular; GTP biosynthetic process; phosphorylation; nucleoside diphosphate phosphorylation; regulation of engulfment of apoptotic cell; kinase activity; ATP binding; transferase activity; nucleoside diphosphate kinase activity; nucleotide binding; positive regulation of MAPK cascade; UTP bios…	protein_coding
WBGene00015236	B0511.11	I:10648600-10654179	N2	rnp-6	OK	11.8385	4.57972	-1.37015	-3.97794	5e-05	0.000725861	yes			protein_coding
WBGene00044644	B0205.13	I:10727750-10728795	N2	rnp-6	OK	3.87433	14.4729	1.90134	3.64017	5e-05	0.000725861	yes			protein_coding
WBGene00021387	Y37F4.6	I:10869944-10875046	N2	rnp-6	OK	1.5741	2.7078	0.782596	1.85537	0.0017	0.0149637	yes	GO:0003700; GO:0006355; GO:0005634; GO:0003676; GO:0003677	nucleic acid binding; DNA binding; nucleus; DNA binding transcription factor activity; regulation of transcription, DNA-templated	protein_coding
WBGene00000780	cpn-4	I:10924237-10925753	N2	rnp-6	OK	49.4957	88.3231	0.835489	3.00546	5e-05	0.000725861	yes	GO:0005515	protein binding	protein_coding
WBGene00001980	hmr-1	I:11075757-11134667	N2	rnp-6	OK	50.2765	63.8028	0.343735	1.57024	0.007	0.0454744	yes	; GO:0016020; GO:0042074; GO:0030154; GO:0070097; GO:0003384; GO:0009792; GO:0007275; GO:0030054; GO:0016021; GO:0007369; GO:0005509; GO:0016477; GO:0016342; GO:0008013; GO:0005913; GO:0005912; GO:0005886; GO:0007155; GO:0007156; GO:0007016; GO:0000132; GO:0007399; GO:0044214; GO:0030866; GO:0005515	; catenin complex; apical constriction involved in gastrulation; integral component of membrane; cell migration involved in gastrulation; adherens junction; cell junction; plasma membrane; calcium ion binding; cytoskeletal anchoring at plasma membrane; establishment of mitotic spindle orientation; spanning component of plasma membrane; cell migration; protein binding; beta-catenin binding; membra…	protein_coding
WBGene00001215	ego-2	I:11400611-11416420	N2	rnp-6	OK	17.5397	22.603	0.36589	1.5675	0.00635	0.042158	yes	GO:0005737; GO:1903361; GO:0005634; GO:0045747; GO:0003674; GO:0005515; GO:0005768; GO:0043162	endosome; ubiquitin-dependent protein catabolic process via the multivesicular body sorting pathway; protein binding; molecular_function; protein localization to basolateral plasma membrane; nucleus; cytoplasm; positive regulation of Notch signaling pathway	protein_coding
WBGene00173414	vab-10	I:11744171-11792118	N2	rnp-6	OK	48.8547	64.1952	0.39397	1.55837	0.0047	0.0334361	yes
WBGene00006876	vab-10	I:11744171-11792118	N2	rnp-6	OK	48.8547	64.1952	0.39397	1.55837	0.0047	0.0334361	yes	GO:0005856; GO:0016337; GO:0016324; GO:0008017; GO:0051015; GO:0003779; GO:0043229; GO:0005882; GO:0005515; GO:0009925; GO:0048730; GO:0030056	actin filament binding; epidermis morphogenesis; basal plasma membrane; actin binding; protein binding; apical plasma membrane; hemidesmosome; intracellular organelle; single organismal cell-cell adhesion; cytoskeleton; intermediate filament; microtubule binding	protein_coding
WBGene00012947	Y47H9C.1	I:11830984-11833166	N2	rnp-6	OK	1.99147	3.66167	0.878667	1.92502	0.001	0.0097769	yes	GO:0045087; GO:0045121	innate immune response; membrane raft	protein_coding
WBGene00012961	Y47H10A.5	I:12095734-12097939	N2	rnp-6	OK	27.7696	42.4805	0.613293	2.23266	0.00025	0.00303907	yes			protein_coding
WBGene00004509	rrf-2	I:12098667-12105977	N2	rnp-6	OK	1.84672	2.67115	0.532495	1.59701	0.00515	0.0358984	yes	GO:0003968; GO:0001172	RNA-directed 5'-3' RNA polymerase activity; transcription, RNA-templated	protein_coding
WBGene00010825	M01G12.14	I:12106911-12108458	N2	rnp-6	OK	0.6525	1.50367	1.20444	1.9306	0.0022	0.0184426	yes			protein_coding
WBGene00010822	M01G12.9	I:12109060-12112513	N2	rnp-6	OK	3.7823	2.21323	-0.773107	-1.98094	0.00105	0.0101691	yes			protein_coding
WBGene00014336	F15H9.6	I:12148079-12150741	N2	rnp-6	OK	636.447	1283.76	1.01226	2.8919	5e-05	0.000725861	yes
WBGene00008476	E03H4.8	I:12424554-12426766	N2	rnp-6	OK	9.0388	12.9499	0.518732	1.66039	0.00435	0.0315234	yes	GO:0006886; GO:0030117; GO:0016192; GO:0005515; GO:0005198	membrane coat; intracellular protein transport; vesicle-mediated transport; structural molecule activity; protein binding	protein_coding
WBGene00009361	F33E2.5	I:12591119-12598916	N2	rnp-6	OK	27.5425	15.7373	-0.807472	-2.5909	5e-05	0.000725861	yes			protein_coding
WBGene00045509	F33E2.5	I:12591119-12598916	N2	rnp-6	OK	27.5425	15.7373	-0.807472	-2.5909	5e-05	0.000725861	yes
WBGene00012474	attf-6	I:12787942-12806581	N2	rnp-6	OK	20.2674	30.7571	0.601758	2.68047	5e-05	0.000725861	yes	GO:0006355	regulation of transcription, DNA-templated	protein_coding
WBGene00012501	Y26D4A.3	I:13072101-13073062	N2	rnp-6	OK	1.78151	0.603966	-1.56056	-1.83457	0.0048	0.0339756	yes	GO:0016021; GO:0016020	integral component of membrane; membrane	protein_coding
WBGene00007660	C17H1.7	I:13136466-13138521	N2	rnp-6	OK	0.529776	2.34567	2.14654	3.616	5e-05	0.000725861	yes			protein_coding
WBGene00009696	F44F1.4	I:13263802-13265570	N2	rnp-6	OK	4.10489	2.62412	-0.645507	-1.63025	0.00585	0.0395707	yes			protein_coding
WBGene00012345	W08E3.4	I:13337459-13338921	N2	rnp-6	OK	1.41144	0.493642	-1.51563	-1.98026	0.0032	0.0247374	yes	GO:0005789	endoplasmic reticulum membrane	protein_coding
WBGene00044066	fbxb-66	I:13423993-13425144	N2	rnp-6	OK	13.7047	7.03534	-0.961976	-2.74628	5e-05	0.000725861	yes	GO:0005515	protein binding	protein_coding
WBGene00012365	W09G3.1	I:13828102-13832146	N2	rnp-6	OK	22.6135	12.798	-0.821266	-2.43773	5e-05	0.000725861	yes	; GO:0005515	; protein binding	protein_coding
WBGene00012239	W04A8.4	I:13841894-13843258	N2	rnp-6	OK	47.5365	33.1479	-0.520118	-1.80733	0.0015	0.0135324	yes	GO:0006139; GO:0008408; GO:0005783; GO:0003676; GO:0090305	nucleobase-containing compound metabolic process; nucleic acid binding; endoplasmic reticulum; 3'-5' exonuclease activity; nucleic acid phosphodiester bond hydrolysis	protein_coding
WBGene00012238	W04A8.3	I:13844728-13846926	N2	rnp-6	OK	4.51384	2.29492	-0.975909	-2.114	0.0007	0.00728567	yes	GO:0005515	protein binding	protein_coding
WBGene00012240	W04A8.5	I:13849617-13850868	N2	rnp-6	OK	11.6125	7.42249	-0.645702	-1.81989	0.0018	0.0156835	yes	GO:0005515	protein binding	protein_coding
WBGene00002113	ins-30	I:14034953-14036040	N2	rnp-6	OK	2.23589	4.01372	0.844092	1.59044	0.00735	0.0471344	yes	GO:0005179; GO:0005576	extracellular region; hormone activity	protein_coding
WBGene00008613	fbxb-69	I:14283463-14285319	N2	rnp-6	OK	2.0703	1.06749	-0.955618	-1.68842	0.00565	0.0385456	yes			protein_coding
WBGene00008612	fbxa-103	I:14287871-14295898	N2	rnp-6	OK	1.32445	0.406677	-1.70344	-2.56057	0.0001	0.00135972	yes	GO:0005515	protein binding	protein_coding
WBGene00001156	ech-7	I:14358524-14369773	N2	rnp-6	OK	11.3509	32.9482	1.53739	1.79811	0.00235	0.0194563	yes	GO:0003824; GO:0006635; GO:0005739; GO:0008152; GO:0004300	metabolic process; catalytic activity; mitochondrion; fatty acid beta-oxidation; enoyl-CoA hydratase activity	protein_coding
WBGene00010585	K05C4.9	I:14726877-14730719	N2	rnp-6	OK	5.68855	2.48732	-1.19347	-3.25986	5e-05	0.000725861	yes	GO:0016567; GO:0031462; GO:0004842; GO:0051438; GO:0005515	protein ubiquitination; protein binding; Cul2-RING ubiquitin ligase complex; ubiquitin-protein transferase activity; regulation of ubiquitin-protein transferase activity	protein_coding
WBGene00006789	unc-54	I:14855898-14863540	N2	rnp-6	OK	75.2187	133.312	0.825641	3.82705	5e-05	0.000725861	yes	GO:0005737; GO:0040011; GO:0018991; GO:0000146; GO:0006936; GO:0043050; GO:0030241; GO:0031672; GO:0051015; GO:0000166; GO:0003779; GO:0008307; GO:0016459; GO:0048017; GO:0005515; GO:0032982; GO:0030016; GO:0005859; GO:0005863; GO:0003774; GO:0005524	actin filament binding; myosin complex; muscle myosin complex; microfilament motor activity; skeletal muscle myosin thick filament assembly; actin binding; motor activity; cytoplasm; striated muscle myosin thick filament; structural constituent of muscle; muscle contraction; A band; oviposition; pharyngeal pumping; inositol lipid-mediated signaling; ATP binding; protein binding; locomotion; myosi…	protein_coding
WBGene00009369	F33H2.6	I:15014850-15016595	N2	rnp-6	OK	83.0915	44.9962	-0.884896	-3.5299	5e-05	0.000725861	yes	GO:0005515	protein binding	protein_coding
WBGene00009371	F33H2.8	I:15031144-15033039	N2	rnp-6	OK	2.76413	1.51003	-0.872253	-1.59087	0.005	0.035079	yes	GO:0016021; GO:0016020	integral component of membrane; membrane	protein_coding
WBGene00016809	C50D2.6	II:84433-87799	N2	rnp-6	OK	2.17961	10.6464	2.28822	5.06638	5e-05	0.000725861	yes			protein_coding
WBGene00015403	clec-10	II:402659-404235	N2	rnp-6	OK	2.76272	5.02487	0.862995	2.15934	0.0002	0.00250605	yes	GO:0030246	carbohydrate binding	protein_coding
WBGene00016071	C24H12.1	II:441497-443674	N2	rnp-6	OK	4.86001	2.81724	-0.786676	-1.86063	0.0013	0.0120757	yes	GO:0016021; GO:0016020; GO:0005515	protein binding; integral component of membrane; membrane	protein_coding
WBGene00021076	W07E6.5	II:476256-478064	N2	rnp-6	OK	13.5925	8.48009	-0.680659	-1.88778	0.00145	0.013173	yes	GO:0016021; GO:0016020	integral component of membrane; membrane	protein_coding
WBGene00020836	lgc-34	II:526591-530364	N2	rnp-6	OK	3.73458	5.99604	0.683065	1.81873	0.0014	0.0128195	yes	GO:0006810; GO:1902476; GO:0005230; GO:0016020; GO:0005216; GO:0034220; GO:0006821; GO:0005886; GO:0006811; GO:0005254; GO:0016021	ion transport; ion transmembrane transport; chloride transmembrane transport; chloride transport; chloride channel activity; ion channel activity; extracellular ligand-gated ion channel activity; transport; membrane; integral component of membrane; plasma membrane	protein_coding
WBGene00020205	arrd-1	II:627512-628668	N2	rnp-6	OK	24.0161	17.304	-0.472896	-1.56547	0.00485	0.0342461	yes			protein_coding
WBGene00019923	fbxc-29	II:916050-917470	N2	rnp-6	OK	5.88746	2.73266	-1.10734	-2.71579	0.00015	0.00195025	yes			protein_coding
WBGene00019921	fbxc-34	II:931183-932327	N2	rnp-6	OK	4.87768	2.23963	-1.12293	-2.40971	0.0001	0.00135972	yes			protein_coding
WBGene00019918	fbxc-36	II:941013-943162	N2	rnp-6	OK	16.487	10.8099	-0.608972	-1.87274	0.001	0.0097769	yes			protein_coding
WBGene00018452	F45D11.5	II:1001734-1002532	N2	rnp-6	OK	2.42041	0.76193	-1.66752	-2.43674	0.0006	0.00643061	yes	GO:0005515	protein binding	protein_coding
WBGene00004076	pod-2	II:1136800-1152705	N2	rnp-6	OK	37.904	80.2258	1.08172	4.87925	5e-05	0.000725861	yes	GO:0006633; GO:0000166; GO:0002119; GO:0045197; GO:0005789; GO:0003824; GO:0003989; GO:0030104; GO:0009949; GO:0004075; GO:0046872; GO:0016874; GO:0005524	endoplasmic reticulum membrane; establishment or maintenance of epithelial cell apical/basal polarity; nematode larval development; water homeostasis; polarity specification of anterior/posterior axis; catalytic activity; fatty acid biosynthetic process; ligase activity; ATP binding; biotin carboxylase activity; acetyl-CoA carboxylase activity; nucleotide binding; metal ion binding	protein_coding
WBGene00044697	poml-4	II:1540927-1542718	N2	rnp-6	OK	1.419	2.87501	1.01869	2.06354	0.00055	0.00597832	yes	GO:0004064; GO:0016788	arylesterase activity; hydrolase activity, acting on ester bonds	protein_coding
WBGene00019414	fbxb-51	II:1550711-1551804	N2	rnp-6	OK	3.06877	1.7748	-0.790009	-1.60679	0.00755	0.0480515	yes			protein_coding
WBGene00006464	bath-47	II:1601788-1604618	N2	rnp-6	OK	3.11274	6.75694	1.11818	3.29944	5e-05	0.000725861	yes	GO:0005515	protein binding	protein_coding
WBGene00003734	nhx-6	II:1670832-1674513	N2	rnp-6	OK	0.0926158	0.813844	3.13542	3.00042	0.0001	0.00135972	yes	GO:0015297; GO:0006810; GO:0098719; GO:0071805; GO:1902600; GO:0006812; GO:0016021; GO:0016020; GO:0015299; GO:0055085; GO:0035725; GO:0005886; GO:0006885; GO:0051453; GO:0015386; GO:0015385; GO:0006814; GO:0006811	hydrogen ion transmembrane transport; cation transport; potassium ion transmembrane transport; sodium ion import across plasma membrane; antiporter activity; potassium:proton antiporter activity; solute:proton antiporter activity; integral component of membrane; ion transport; sodium:proton antiporter activity; sodium ion transport; plasma membrane; membrane; regulation of pH; sodium ion transmem…	protein_coding
WBGene00018103	F36H5.4	II:1761838-1762906	N2	rnp-6	OK	2.7341	1.44222	-0.922774	-1.78886	0.00375	0.0280629	yes	GO:0016021; GO:0016020	integral component of membrane; membrane	protein_coding
WBGene00018100	math-26	II:1771646-1774955	N2	rnp-6	OK	4.21989	2.69899	-0.644787	-1.82216	0.00245	0.0200889	yes	GO:0005515	protein binding	protein_coding
WBGene00219271	F36H5.14,math-3	II:1775546-1778526	N2	rnp-6	OK	11.4143	6.14108	-0.894281	-2.24643	0.00035	0.00407043	yes	GO:0005515	protein binding	protein_coding
WBGene00015608	F36H5.14,math-3	II:1775546-1778526	N2	rnp-6	OK	11.4143	6.14108	-0.894281	-2.24643	0.00035	0.00407043	yes	; GO:0005515	; protein binding	protein_coding
WBGene00020359	math-40	II:1830631-1831789	N2	rnp-6	OK	2.78179	1.49264	-0.898142	-1.72846	0.00465	0.03317	yes	GO:0005515	protein binding	protein_coding
WBGene00015828	math-14	II:1869409-1870797	N2	rnp-6	OK	2.01185	5.11657	1.34665	2.98823	5e-05	0.000725861	yes	GO:0005515	protein binding	protein_coding
WBGene00016717	math-22	II:1905428-1907775	N2	rnp-6	OK	3.2334	1.68182	-0.94303	-2.02488	0.0011	0.0105816	yes	GO:0005515	protein binding	protein_coding
WBGene00017208	fbxb-35	II:2050022-2052745	N2	rnp-6	OK	3.59821	2.06984	-0.797758	-1.67236	0.006	0.0403716	yes	GO:0005515	protein binding	protein_coding
WBGene00020073	sdz-28	II:2131079-2132475	N2	rnp-6	OK	28.6768	19.4174	-0.562533	-1.97082	0.0008	0.00816818	yes	GO:0007369; GO:0005515	protein binding; gastrulation	protein_coding
WBGene00016547	C40A11.4	II:2137460-2138990	N2	rnp-6	OK	7.35066	4.06899	-0.853202	-1.92681	0.0016	0.014229	yes	GO:0051260; GO:0005515	protein binding; protein homooligomerization	protein_coding
WBGene00016546	C40A11.3	II:2141117-2142957	N2	rnp-6	OK	3.37855	1.79821	-0.909837	-1.68342	0.0066	0.0434415	yes	GO:0051260; GO:0005515	protein binding; protein homooligomerization	protein_coding
WBGene00016545	C40A11.2	II:2146949-2148775	N2	rnp-6	OK	6.62632	3.33787	-0.98928	-2.14853	0.00045	0.00504819	yes	GO:0051260; GO:0005515	protein binding; protein homooligomerization	protein_coding
WBGene00016335	gba-1	II:2176891-2181975	N2	rnp-6	OK	100.92	50.3107	-1.00427	-4.38619	5e-05	0.000725861	yes	GO:0016787; GO:0004348; GO:0005764; GO:0006680; GO:0006665; GO:0006629	glucosylceramide catabolic process; lysosome; hydrolase activity; glucosylceramidase activity; lipid metabolic process; sphingolipid metabolic process	protein_coding
WBGene00015110	B0281.3	II:2307040-2308351	N2	rnp-6	OK	10.3378	14.8953	0.526932	1.61177	0.0053	0.0367133	yes	GO:0008270; GO:0005515; GO:0005622	protein binding; intracellular; zinc ion binding	protein_coding
WBGene00018384	F43C11.7	II:2335932-2337694	N2	rnp-6	OK	12.4006	19.5931	0.65993	2.04405	0.0002	0.00250605	yes	GO:0008340; GO:0050830; GO:0008270; GO:0005515; GO:0005622	protein binding; defense response to Gram-positive bacterium; intracellular; determination of adult lifespan; zinc ion binding	protein_coding
WBGene00018766	F53G2.1	II:2488753-2496641	N2	rnp-6	OK	1.28789	0.48953	-1.39554	-2.4829	0.00015	0.00195025	yes			protein_coding
WBGene00017249	fbxb-108	II:2764963-2767230	N2	rnp-6	OK	2.5669	0.963492	-1.41368	-2.85332	5e-05	0.000725861	yes	GO:0005515	protein binding	protein_coding
WBGene00022441	Y110A2AL.4	II:2839303-2840386	N2	rnp-6	OK	17.1996	8.10139	-1.08614	-2.84192	5e-05	0.000725861	yes			protein_coding
WBGene00022568	ZC239.5	II:3212370-3213208	N2	rnp-6	OK	0.487274	1.52941	1.65017	1.97562	0.0037	0.027775	yes	GO:0016021; GO:0016020; GO:0051260; GO:0005515	protein binding; protein homooligomerization; integral component of membrane; membrane	protein_coding
WBGene00018195	btb-16	II:3296907-3298176	N2	rnp-6	OK	3.69109	6.65762	0.85096	2.17674	0.0003	0.00356315	yes	GO:0005515	protein binding	protein_coding
WBGene00018194	F39E9.1	II:3318301-3320358	N2	rnp-6	OK	5.30461	3.06035	-0.79355	-1.92716	0.0013	0.0120757	yes
WBGene00021727	bath-23	II:3371309-3372145	N2	rnp-6	OK	0.363018	1.17065	1.6892	1.83273	0.0059	0.0398386	yes	GO:0005515	protein binding	protein_coding
WBGene00021726	bath-10	II:3375142-3376714	N2	rnp-6	OK	9.19823	3.91438	-1.23257	-3.10407	5e-05	0.000725861	yes	GO:0005515	protein binding	protein_coding
WBGene00021725	Y49F6C.2,bath-9	II:3377110-3379551	N2	rnp-6	OK	11.9784	7.0371	-0.767377	-2.11242	0.0006	0.00643061	yes	GO:0005515	protein binding	protein_coding
WBGene00021724	Y49F6C.2,bath-9	II:3377110-3379551	N2	rnp-6	OK	11.9784	7.0371	-0.767377	-2.11242	0.0006	0.00643061	yes			protein_coding
WBGene00195070	C16C8.20	II:3446956-3448020	N2	rnp-6	OK	10.3207	4.52407	-1.18986	-2.31556	0.00035	0.00407043	yes	GO:0005515	protein binding	protein_coding
WBGene00194713	F19B10.13	II:3662257-3662986	N2	rnp-6	OK	1.38671	4.78404	1.78657	3.19988	5e-05	0.000725861	yes			protein_coding
WBGene00021171	Y8A9A.2	II:3795622-3800608	N2	rnp-6	OK	0.906109	1.40568	0.633508	1.5744	0.0068	0.044487	yes			protein_coding
WBGene00018803	fbxa-24	II:3816960-3818238	N2	rnp-6	OK	3.39861	1.11699	-1.60533	-3.19747	5e-05	0.000725861	yes			protein_coding
WBGene00004751	sea-2	II:3950376-3972138	N2	rnp-6	OK	3.21037	6.07865	0.921012	1.77978	0.00315	0.0244316	yes	GO:0005737; ; GO:0007549; GO:0005634; GO:0003727; GO:0010629; GO:0003725; GO:0003676; GO:0009408; GO:0008340; GO:0040034	; nucleic acid binding; regulation of development, heterochronic; cytoplasm; double-stranded RNA binding; dosage compensation; negative regulation of gene expression; response to heat; single-stranded RNA binding; nucleus; determination of adult lifespan	protein_coding
WBGene00220022	sea-2	II:3950376-3972138	N2	rnp-6	OK	3.21037	6.07865	0.921012	1.77978	0.00315	0.0244316	yes
WBGene00020007	R11F4.1	II:4091836-4094348	N2	rnp-6	OK	22.5773	30.7657	0.446449	1.74768	0.00225	0.0187814	yes	GO:0004370; GO:0019563; GO:0005975; GO:0006641; GO:0016773; GO:0016310; GO:0016301; GO:0005739; GO:0000166; GO:0046167; GO:0016740; GO:0006071; GO:0006072; GO:0005524	triglyceride metabolic process; glycerol metabolic process; glycerol-3-phosphate metabolic process; transferase activity; carbohydrate metabolic process; phosphorylation; kinase activity; glycerol catabolic process; ATP binding; phosphotransferase activity, alcohol group as acceptor; mitochondrion; glycerol-3-phosphate biosynthetic process; nucleotide binding; glycerol kinase activity	protein_coding
WBGene00006495	cpna-1	II:4186665-4208499	N2	rnp-6	OK	10.2062	14.7418	0.530469	1.65635	0.0045	0.0323767	yes	; GO:0005737; GO:0030674; GO:0031430; GO:0060298; GO:0016021; GO:0016020; GO:0009925; GO:0055120; GO:0005515; GO:0005886; GO:0019902	; positive regulation of sarcomere organization; phosphatase binding; M band; basal plasma membrane; cytoplasm; membrane; striated muscle dense body; protein binding; protein binding, bridging; integral component of membrane; plasma membrane	protein_coding
WBGene00001976	hmg-11	II:4672797-4673747	N2	rnp-6	OK	139.571	103.203	-0.435514	-1.72808	0.0025	0.0203879	yes	GO:0003677	DNA binding	protein_coding
WBGene00018267	F41C3.1	II:4752387-4752942	N2	rnp-6	OK	5.515	1.55602	-1.8255	-2.45555	0.00065	0.0068644	yes			protein_coding
WBGene00016351	C33F10.1	II:4835028-4835717	N2	rnp-6	OK	0.657272	2.27292	1.78999	2.20956	0.0008	0.00816818	yes			protein_coding
WBGene00003402	mpk-2	II:5104117-5108901	N2	rnp-6	OK	23.7605	15.6681	-0.600738	-2.08598	0.0002	0.00250605	yes	GO:0005737; GO:0006468; GO:0016310; GO:0005634; GO:0016301; GO:0000165; GO:0004707; GO:0000166; GO:0004674; GO:0016740; GO:0004672; GO:0005622; GO:0071310; GO:0010468; GO:0005524	MAPK cascade; MAP kinase activity; protein phosphorylation; transferase activity; intracellular; regulation of gene expression; phosphorylation; protein kinase activity; kinase activity; nucleus; ATP binding; cytoplasm; protein serine/threonine kinase activity; nucleotide binding; cellular response to organic substance	protein_coding
WBGene00019022	F58A6.1	II:5142342-5144021	N2	rnp-6	OK	38.7064	16.2974	-1.24793	-4.18626	5e-05	0.000725861	yes	GO:0003824; GO:0008152	metabolic process; catalytic activity	protein_coding
WBGene00003442	msp-49	II:5194331-5194792	N2	rnp-6	OK	0.937398	2.59261	1.46767	1.79599	0.0063	0.0419085	yes	GO:0005856; GO:0005737; GO:0042995; GO:0031143	cytoplasm; cytoskeleton; cell projection; pseudopodium	protein_coding
WBGene00003443	msp-50	II:5199762-5200222	N2	rnp-6	OK	1.09147	3.2978	1.59524	2.04916	0.00115	0.01096	yes	GO:0005856; GO:0005737; GO:0042995; GO:0031143	cytoplasm; cytoskeleton; cell projection; pseudopodium	protein_coding
WBGene00017286	F09E5.8	II:5350668-5351992	N2	rnp-6	OK	49.16	35.4505	-0.471681	-1.69025	0.0032	0.0247374	yes	GO:0030170; GO:0005622	pyridoxal phosphate binding; intracellular	protein_coding
WBGene00017133	EEED8.2	II:5416713-5418447	N2	rnp-6	OK	14.6983	9.33334	-0.655181	-1.91863	0.00115	0.01096	yes	GO:0005215; GO:0006810; GO:0008289	transporter activity; lipid binding; transport	protein_coding
WBGene00017143	EEED8.15	II:5419247-5421091	N2	rnp-6	OK	23.5876	14.6943	-0.682777	-2.3363	5e-05	0.000725861	yes			protein_coding
WBGene00197976	F56D1.10	II:5462215-5462408	N2	rnp-6	OK	0	1.94142	inf		0.0028	0.0222533	yes
WBGene00002095	ins-12	II:5554616-5555306	N2	rnp-6	OK	0	1.24913	inf		0.0001	0.00135972	yes	GO:0005179; GO:0005576	extracellular region; hormone activity	protein_coding
WBGene00019407	K05F1.5	II:5789171-5794402	N2	rnp-6	OK	8.63072	4.79539	-0.847832	-2.43738	5e-05	0.000725861	yes			protein_coding
WBGene00017436	F13H8.3	II:6264060-6265508	N2	rnp-6	OK	8.90516	5.15511	-0.788638	-2.1875	0.0002	0.00250605	yes	GO:0006152; GO:0008477; GO:0005829	cytosol; purine nucleoside catabolic process; purine nucleosidase activity	protein_coding
WBGene00016210	C29F5.1	II:6303511-6306285	N2	rnp-6	OK	14.6749	20.5636	0.486742	1.64839	0.0037	0.027775	yes	GO:0016529	sarcoplasmic reticulum	protein_coding
WBGene00020799	T25D10.1	II:6403480-6405034	N2	rnp-6	OK	9.84792	6.12406	-0.685331	-1.95214	0.00065	0.0068644	yes	GO:0043413; GO:0016021; GO:0016020; GO:0045087; GO:0016757	transferase activity, transferring glycosyl groups; innate immune response; integral component of membrane; macromolecule glycosylation; membrane	protein_coding
WBGene00020579	T19D12.4	II:6631153-6643117	N2	rnp-6	OK	38.2633	54.1457	0.500887	1.90125	0.00115	0.01096	yes	GO:0045121; GO:0016021; GO:0016020; GO:0034219; GO:0090481; GO:0015165; GO:0050829; GO:0045087	innate immune response; carbohydrate transmembrane transport; integral component of membrane; pyrimidine nucleotide-sugar transmembrane transporter activity; membrane; pyrimidine nucleotide-sugar transmembrane transport; membrane raft; defense response to Gram-negative bacterium	protein_coding
WBGene00020576	T19D12.1	II:6666897-6673747	N2	rnp-6	OK	9.33993	7.11964	-0.391608	-1.54861	0.0072	0.0464409	yes	GO:0016021; GO:0016020	integral component of membrane; membrane	protein_coding
WBGene00016002	C18H9.3	II:6684235-6691841	N2	rnp-6	OK	31.805	43.6464	0.456609	2.01005	0.0007	0.00728567	yes	GO:0005515	protein binding	protein_coding
WBGene00016890	lst-5	II:7022926-7024930	N2	rnp-6	OK	6.61134	4.25069	-0.637247	-1.61658	0.00635	0.042158	yes	GO:0003676	nucleic acid binding	protein_coding
WBGene00020164	T02G5.4	II:7082101-7084083	N2	rnp-6	OK	5.24123	7.7093	0.556695	1.59929	0.00535	0.0369777	yes
WBGene00017123	maoc-1	II:7196275-7199565	N2	rnp-6	OK	154.404	81.1179	-0.928614	-3.86017	5e-05	0.000725861	yes	GO:0005778; GO:0006635; GO:0045087; GO:0016508; GO:0050829; GO:0042802	innate immune response; long-chain-enoyl-CoA hydratase activity; identical protein binding; peroxisomal membrane; fatty acid beta-oxidation; defense response to Gram-negative bacterium	protein_coding
WBGene00017970	F32A5.4	II:7228783-7230615	N2	rnp-6	OK	32.6952	46.6475	0.512723	1.86656	0.0009	0.00897191	yes	; GO:0005576	extracellular region;	protein_coding
WBGene00016274	C30G12.2	II:7290372-7291943	N2	rnp-6	OK	1.98495	7.44145	1.90648	4.48786	5e-05	0.000725861	yes			protein_coding
WBGene00015569	C07D10.5	II:7381437-7383490	N2	rnp-6	OK	26.8714	18.3286	-0.551973	-1.95264	0.00065	0.0068644	yes			protein_coding
WBGene00006947	wrt-1	II:7531154-7533247	N2	rnp-6	OK	5.6546	1.56382	-1.85435	-4.28332	5e-05	0.000725861	yes	GO:0016787; GO:0005615; GO:0016540; GO:0009986; GO:0016020; GO:0016539; GO:0005576; GO:0003674; GO:0005886; GO:0007267; GO:0006508; GO:0008233; GO:0007275; GO:0007367	protein autoprocessing; extracellular space; intein-mediated protein splicing; extracellular region; molecular_function; peptidase activity; hydrolase activity; segment polarity determination; cell-cell signaling; membrane; cell surface; proteolysis; multicellular organism development; plasma membrane	protein_coding
WBGene00004398	rol-8	II:7544105-7545332	N2	rnp-6	OK	0.127802	0.627572	2.29588	1.70714	0.00495	0.0348181	yes	GO:0005581; GO:0042302	structural constituent of cuticle; collagen trimer	protein_coding
WBGene00008436	DH11.2	II:8012815-8015254	N2	rnp-6	OK	14.5159	20.1821	0.475444	1.65395	0.00315	0.0244316	yes			protein_coding
WBGene00004264	qua-1	II:8198802-8204005	N2	rnp-6	OK	0.638931	0.351455	-0.86232	-1.65771	0.00555	0.0380172	yes	GO:0018996; GO:0031410; GO:0002119; GO:0005578; GO:0016539; GO:0005576; GO:0007267; GO:0006508; GO:0008233; GO:0060102; GO:0007275	proteinaceous extracellular matrix; nematode larval development; intein-mediated protein splicing; extracellular region; collagen and cuticulin-based cuticle extracellular matrix; cytoplasmic vesicle; peptidase activity; cell-cell signaling; proteolysis; molting cycle, collagen and cuticulin-based cuticle; multicellular organism development	protein_coding
WBGene00009899	efl-3	II:8412670-8416855	N2	rnp-6	OK	10.6741	7.21654	-0.564739	-1.86694	0.00135	0.0124346	yes	GO:0003700; GO:0005634; GO:0006355; GO:0006351; GO:0005667; GO:0003677	regulation of transcription, DNA-templated; DNA binding; nucleus; DNA binding transcription factor activity; transcription factor complex; transcription, DNA-templated	protein_coding
WBGene00008803	lips-10	II:8439149-8442152	N2	rnp-6	OK	34.8251	47.4582	0.44653	1.69043	0.00305	0.0238181	yes	GO:0016787	hydrolase activity	protein_coding
WBGene00001523	gbh-2	II:8485937-8508965	N2	rnp-6	OK	13.844	7.77766	-0.831851	-1.97643	0.0009	0.00897191	yes	GO:0031418; GO:0050353; GO:0045329; GO:0005506; GO:0055114; GO:0016491	carnitine biosynthetic process; oxidoreductase activity; iron ion binding; oxidation-reduction process; L-ascorbic acid binding; trimethyllysine dioxygenase activity	protein_coding
WBGene00011756	ctg-2	II:8514825-8517106	N2	rnp-6	OK	4.98266	3.2488	-0.61701	-1.61434	0.0053	0.0367133	yes	GO:0016021; GO:0006810	integral component of membrane; transport	protein_coding
WBGene00004155	pqn-73	II:8540719-8545452	N2	rnp-6	OK	3.72593	1.71129	-1.12252	-2.83533	5e-05	0.000725861	yes	GO:0016021; GO:0016020	integral component of membrane; membrane	protein_coding
WBGene00007919	C34C6.7	II:8707154-8708854	N2	rnp-6	OK	24.6692	15.1819	-0.700363	-2.32456	5e-05	0.000725861	yes	; GO:0005764; GO:0006897; GO:0005575; GO:0003674; GO:1905146	; lysosome; lysosomal protein catabolic process; molecular_function; cellular_component; endocytosis	protein_coding
WBGene00014307	F07H5.3	II:8784534-8785513	N2	rnp-6	OK	117.226	79.0834	-0.567841	-2.30362	0.0001	0.00135972	yes
WBGene00014309	F07H5.5	II:8787769-8789716	N2	rnp-6	OK	346.865	272.718	-0.346962	-1.61077	0.0045	0.0323767	yes
WBGene00008563	F07H5.13	II:8790557-8791376	N2	rnp-6	OK	22.1415	8.59523	-1.36514	-3.72951	5e-05	0.000725861	yes			protein_coding
WBGene00012323	oac-54	II:9158107-9159874	N2	rnp-6	OK	1.08618	0.200833	-2.4352	-3.00881	0.00015	0.00195025	yes	GO:0016021; GO:0016020; GO:0016746; GO:0016740; GO:0016747	transferase activity; transferase activity, transferring acyl groups other than amino-acyl groups; transferase activity, transferring acyl groups; integral component of membrane; membrane	protein_coding
WBGene00001761	gst-13	II:9231496-9232341	N2	rnp-6	OK	106.123	42.5471	-1.3186	-4.98635	5e-05	0.000725861	yes	GO:0016740; GO:0045087; GO:0005515	transferase activity; protein binding; innate immune response	protein_coding
WBGene00012032	T26C5.2	II:9233222-9236197	N2	rnp-6	OK	1.78822	0.559284	-1.67687	-3.14859	5e-05	0.000725861	yes	GO:0042335; GO:0002064	epithelial cell development; cuticle development	protein_coding
WBGene00007228	acs-7	II:9292016-9295753	N2	rnp-6	OK	25.6268	10.8728	-1.23692	-4.2867	5e-05	0.000725861	yes	GO:0003824; GO:0008152	metabolic process; catalytic activity	protein_coding
WBGene00007375	C06C3.4	II:9373290-9374854	N2	rnp-6	OK	1.42809	0.582426	-1.29394	-1.88356	0.0035	0.0265526	yes			protein_coding
WBGene00014251	gstk-1	II:9656748-9657721	N2	rnp-6	OK	107.921	76.8858	-0.489188	-1.96093	0.0007	0.00728567	yes	GO:0004364; GO:0045087; GO:0005777; GO:0016740; GO:0015035; GO:0055114	innate immune response; transferase activity; protein disulfide oxidoreductase activity; glutathione transferase activity; peroxisome; oxidation-reduction process	protein_coding
WBGene00000372	cyp-13A7	II:9803619-9805510	N2	rnp-6	OK	0.271311	0.97171	1.84058	2.67845	0.00025	0.00303907	yes	GO:0004497; GO:0020037; GO:0016705; GO:0005506; GO:0046872; GO:0055114; GO:0016491	oxidoreductase activity; iron ion binding; oxidoreductase activity, acting on paired donors, with incorporation or reduction of molecular oxygen; metal ion binding; heme binding; monooxygenase activity; oxidation-reduction process	protein_coding
WBGene00007331	pho-11	II:9931844-9936893	N2	rnp-6	OK	58.693	19.5505	-1.58598	-2.18159	0.0032	0.0247374	yes	GO:0016311; GO:0016787; GO:0003993	hydrolase activity; acid phosphatase activity; dephosphorylation	protein_coding
WBGene00007332	C05C10.5	II:9939153-9940337	N2	rnp-6	OK	152.946	195.897	0.357073	1.60825	0.0052	0.0361513	yes	; GO:0005515	; protein binding	protein_coding
WBGene00011663	T09F3.4	II:10395706-10396785	N2	rnp-6	OK	25.5607	11.818	-1.11294	-3.267	5e-05	0.000725861	yes	GO:0003676	nucleic acid binding	protein_coding
WBGene00007560	C14A4.9	II:10599336-10602276	N2	rnp-6	OK	3.30001	0.671004	-2.29808	-2.45669	0.0012	0.0113201	yes			protein_coding
WBGene00010899	M28.8	II:10628268-10633217	N2	rnp-6	OK	23.9306	11.9	-1.00789	-3.8772	5e-05	0.000725861	yes	GO:0016021; GO:0016020	integral component of membrane; membrane	protein_coding
WBGene00004704	rsp-7	II:10659207-10665090	N2	rnp-6	OK	79.2401	116.844	0.560282	2.44907	5e-05	0.000725861	yes	; GO:0005634; GO:0000398; GO:0003723; GO:0003676; GO:0008380; GO:0006397	; nucleic acid binding; RNA binding; RNA splicing; mRNA processing; nucleus; mRNA splicing, via spliceosome	protein_coding
WBGene00000656	col-80	II:10695053-10714299	N2	rnp-6	OK	112.715	255.86	1.18268	3.39556	5e-05	0.000725861	yes	GO:0005581; GO:0042302	structural constituent of cuticle; collagen trimer	protein_coding
WBGene00001153	ech-4	II:10821030-10824079	N2	rnp-6	OK	99.1291	134.619	0.441496	1.75324	0.002	0.017068	yes	GO:0003824; GO:0006635; GO:0000062; GO:0008152; GO:0019915	metabolic process; catalytic activity; fatty-acyl-CoA binding; lipid storage; fatty acid beta-oxidation	protein_coding
WBGene00010988	metr-1	II:10926560-10931077	N2	rnp-6	OK	100.191	158.981	0.6661	3.08726	5e-05	0.000725861	yes	GO:0031419; GO:0008652; GO:0032259; GO:0008898; GO:0005829; GO:0009086; GO:0044237; GO:0005622; GO:0016740; GO:0008705; GO:0008270; GO:0008168; GO:0046872; GO:0042558	methionine synthase activity; cobalamin binding; S-adenosylmethionine-homocysteine S-methyltransferase activity; pteridine-containing compound metabolic process; methylation; cytosol; transferase activity; intracellular; methionine biosynthetic process; zinc ion binding; methyltransferase activity; metal ion binding; cellular amino acid biosynthetic process; cellular metabolic process	protein_coding
WBGene00009512	F37H8.3	II:11181653-11184809	N2	rnp-6	OK	25.7636	14.7792	-0.801764	-2.03801	0.0008	0.00816818	yes	GO:0016787; GO:0008152	metabolic process; hydrolase activity	protein_coding
WBGene00007340	C05D12.2	II:11418313-11423381	N2	rnp-6	OK	5.57165	2.59648	-1.10155	-3.31831	5e-05	0.000725861	yes	GO:0005515	protein binding	protein_coding
WBGene00010050	F54D5.4	II:11569817-11571002	N2	rnp-6	OK	164.78	93.7893	-0.813047	-3.26504	5e-05	0.000725861	yes	GO:0045087	innate immune response	protein_coding
WBGene00009692	F44E5.5	II:11759680-11761852	N2	rnp-6	OK	1.3862	0.473692	-1.54912	-2.77938	5e-05	0.000725861	yes	GO:0005524; GO:0000166	nucleotide binding; ATP binding	protein_coding
WBGene00004394	rol-1	II:12172572-12176071	N2	rnp-6	OK	0.148943	0.600828	2.01219	2.22407	0.0021	0.0177668	yes	GO:0016021; GO:0016020; GO:0042302	structural constituent of cuticle; integral component of membrane; membrane	protein_coding
WBGene00013263	Y57A10A.23	II:12240387-12242090	N2	rnp-6	OK	34.4075	21.3136	-0.690948	-2.1765	0.0004	0.00457121	yes	GO:0060548; GO:0045454; GO:0030154; GO:0005783	cell redox homeostasis; negative regulation of cell death; endoplasmic reticulum; cell differentiation	protein_coding
WBGene00012585	lips-15	II:12605967-12607027	N2	rnp-6	OK	24.3438	37.1173	0.60854	2.09811	0.0002	0.00250605	yes	GO:0016787	hydrolase activity	protein_coding
WBGene00009397	clec-66	II:12904399-12906607	N2	rnp-6	OK	47.7087	33.1049	-0.527207	-2.01289	0.0004	0.00457121	yes	GO:0045087; GO:0030246	innate immune response; carbohydrate binding	protein_coding
WBGene00010263	wago-4	II:12919576-12923373	N2	rnp-6	OK	49.0471	63.0725	0.362843	1.6532	0.00325	0.0250162	yes	GO:0031048; GO:0005515; GO:0003676	nucleic acid binding; chromatin silencing by small RNA; protein binding	protein_coding
WBGene00010266	dct-18	II:12930616-12933524	N2	rnp-6	OK	288.295	152.978	-0.914218	-4.05199	5e-05	0.000725861	yes			protein_coding
WBGene00006999	zyx-1	II:13056813-13071530	N2	rnp-6	OK	14.2233	20.7396	0.54413	1.69651	0.00305	0.0238181	yes	GO:0005856; GO:0005737; GO:0042995; GO:0005925; GO:0015629; GO:0007399; GO:0005634; GO:0099558; GO:0030424; GO:0055120; GO:0008270; GO:0005515; GO:0007155; GO:0017151; GO:0046872; ; GO:0031430; GO:0030054; GO:0000003	; M band; cell projection; cytoplasm; DEAD/H-box RNA helicase binding; striated muscle dense body; maintenance of synapse structure; zinc ion binding; axon; focal adhesion; nucleus; metal ion binding; reproduction; protein binding; cell adhesion; cytoskeleton; actin cytoskeleton; nervous system development; cell junction	protein_coding
WBGene00009642	F42G4.5	II:13073492-13076225	N2	rnp-6	OK	13.1769	8.93264	-0.560851	-1.56346	0.0065	0.0429476	yes			protein_coding
WBGene00012994	Y48C3A.12	II:13376411-13388762	N2	rnp-6	OK	22.7124	32.3596	0.510716	2.05396	0.00015	0.00195025	yes	GO:0005737; GO:0003700; GO:0005634; GO:0006355	cytoplasm; nucleus; DNA binding transcription factor activity; regulation of transcription, DNA-templated	protein_coding
WBGene00008448	E01G4.6	II:13482404-13485780	N2	rnp-6	OK	0.0779045	0.535295	2.78056	3.15376	0.0001	0.00135972	yes			protein_coding
WBGene00006404	tag-10	II:13632654-13636982	N2	rnp-6	OK	38.7572	58.4741	0.593334	2.44192	5e-05	0.000725861	yes	GO:0045121; GO:0005515	protein binding; membrane raft	protein_coding
WBGene00007841	C31C9.7	II:13669103-13669713	N2	rnp-6	OK	4.67617	8.4848	0.859552	1.73045	0.004	0.0295586	yes			protein_coding
WBGene00012198	W02B8.2	II:13908924-13915253	N2	rnp-6	OK	36.7926	19.6184	-0.907207	-3.92207	5e-05	0.000725861	yes	GO:0035556; GO:0046872; GO:0005622	intracellular; intracellular signal transduction; metal ion binding	protein_coding
WBGene00008496	F01D5.6	II:14006510-14008576	N2	rnp-6	OK	1.22014	0.563569	-1.11438	-1.76778	0.00555	0.0380172	yes	GO:0005892	acetylcholine-gated channel complex	protein_coding
WBGene00012730	xrn-1	II:14068948-14088892	N2	rnp-6	OK	23.1512	31.0089	0.421597	1.87685	0.00115	0.01096	yes	GO:0005737; GO:0016787; GO:0008409; GO:0010607; GO:0004518; GO:0004527; GO:0090305; GO:0000956; GO:0003723; GO:0003676; GO:0008340	nucleic acid binding; hydrolase activity; RNA binding; negative regulation of cytoplasmic mRNA processing body assembly; nucleic acid phosphodiester bond hydrolysis; determination of adult lifespan; nuclease activity; cytoplasm; nuclear-transcribed mRNA catabolic process; 5'-3' exonuclease activity; exonuclease activity	protein_coding
WBGene00013221	Y54G11A.14	II:14318157-14321039	N2	rnp-6	OK	1.09447	4.13299	1.91695	3.23773	5e-05	0.000725861	yes	; GO:0016021; GO:0016020	; integral component of membrane; membrane	protein_coding
WBGene00010196	F57C2.4	II:14525311-14526033	N2	rnp-6	OK	278.788	192.862	-0.531602	-2.01865	0.00055	0.00597832	yes			protein_coding
WBGene00008964	mltn-9	II:14616128-14622589	N2	rnp-6	OK	2.01629	1.23293	-0.709611	-1.68966	0.00365	0.0274633	yes			protein_coding
WBGene00013852	hhat-1	II:14675262-14684296	N2	rnp-6	OK	2.00488	0.866525	-1.2102	-1.76162	0.00775	0.0489842	yes	GO:0016021; GO:0016020; GO:0016746; GO:0016740	transferase activity; transferase activity, transferring acyl groups; integral component of membrane; membrane	protein_coding
WBGene00001225	eif-3.B	II:14795403-14798234	N2	rnp-6	OK	102.308	140.712	0.459835	2.13527	0.00025	0.00303907	yes	GO:0005737; GO:0005852; GO:0006446; GO:0003723; GO:0031369; GO:0006413; GO:0006412; GO:0003743	regulation of translational initiation; eukaryotic translation initiation factor 3 complex; RNA binding; cytoplasm; translation initiation factor binding; translation initiation factor activity; translational initiation; translation	protein_coding
WBGene00011042	R05H10.1	II:14852429-14853627	N2	rnp-6	OK	17.4909	28.5557	0.707178	2.31951	0.0001	0.00135972	yes	GO:0005737; GO:0006807; GO:0008080	cytoplasm; N-acetyltransferase activity; nitrogen compound metabolic process	protein_coding
WBGene00044720	Y53F4B.42	II:14969647-14977000	N2	rnp-6	OK	10.595	16.3358	0.624653	1.6346	0.0046	0.032894	yes	GO:0008168; GO:0016740; GO:0032259	transferase activity; methyltransferase activity; methylation	protein_coding
WBGene00019285	cbn-1	II:328563-332513	N2	rnp-6	OK	1.63439	0.837731	-0.964191	-1.81427	0.0029	0.0228734	yes	GO:0005578; GO:0005509; GO:0007165	calcium ion binding; proteinaceous extracellular matrix; signal transduction	protein_coding
WBGene00004218	ptr-3	II:362493-367555	N2	rnp-6	OK	2.53216	1.64115	-0.625659	-1.64792	0.00495	0.0348181	yes	GO:0016021; GO:0016020; GO:0018996	molting cycle, collagen and cuticulin-based cuticle; integral component of membrane; membrane	protein_coding
WBGene00020834	T27A1.2	II:530847-533184	N2	rnp-6	OK	5.65895	9.40318	0.732615	2.02916	0.0005	0.00551085	yes			protein_coding
WBGene00017874	acdh-9	II:846866-848602	N2	rnp-6	OK	50.2841	69.6061	0.46911	1.97012	0.0007	0.00728567	yes	GO:0050660; GO:0006629; GO:0016627; GO:0008152; GO:0003995; GO:0055114; GO:0016491	oxidoreductase activity, acting on the CH-CH group of donors; flavin adenine dinucleotide binding; oxidoreductase activity; metabolic process; oxidation-reduction process; lipid metabolic process; acyl-CoA dehydrogenase activity	protein_coding
WBGene00019705	fbxb-45	II:1042968-1044025	N2	rnp-6	OK	9.65043	5.883	-0.714041	-1.89919	0.0014	0.0128195	yes	GO:0005515	protein binding	protein_coding
WBGene00219708	linc-13	II:1071506-1071839	N2	rnp-6	OK	1.09117	0	-inf		0.00035	0.00407043	yes
WBGene00018819	rog-1	II:1369045-1374985	N2	rnp-6	OK	13.4539	18.4439	0.455114	1.60722	0.0045	0.0323767	yes	GO:0005158	insulin receptor binding	protein_coding
WBGene00021791	Y51H7C.13	II:1463265-1467367	N2	rnp-6	OK	0.313666	1.17658	1.90729	2.49257	0.0002	0.00250605	yes			protein_coding
WBGene00019418	fbxb-54	II:1555256-1556311	N2	rnp-6	OK	6.66273	3.83682	-0.796201	-1.95222	0.0015	0.0135324	yes	GO:0005515	protein binding	protein_coding
WBGene00020326	math-38	II:1577368-1579986	N2	rnp-6	OK	0.248268	0.718058	1.5322	1.93715	0.00275	0.0219448	yes	GO:0050830; GO:0005515	protein binding; defense response to Gram-positive bacterium	protein_coding
WBGene00020329	bath-26	II:1598028-1600714	N2	rnp-6	OK	1.26964	3.31044	1.3826	2.4119	0.00025	0.00303907	yes	GO:0005515	protein binding	protein_coding
WBGene00015598	fbxa-163	II:1609254-1610715	N2	rnp-6	OK	0.251252	2.5483	3.34233	4.44526	5e-05	0.000725861	yes	GO:0005515	protein binding	protein_coding
WBGene00022562	ZC204.12	II:1656262-1657302	N2	rnp-6	OK	5.97721	3.1243	-0.935938	-2.12034	0.00045	0.00504819	yes			protein_coding
WBGene00019039	fbxb-18	II:1686833-1687795	N2	rnp-6	OK	3.52424	1.7297	-1.02679	-2.02602	0.0011	0.0105816	yes			protein_coding
WBGene00019043	fbxc-26	II:1693295-1694615	N2	rnp-6	OK	2.75529	1.52572	-0.852717	-1.77003	0.0031	0.0241392	yes			protein_coding
WBGene00206519	F36H5.13	II:1748377-1749943	N2	rnp-6	OK	1.88419	0.877441	-1.10257	-2.05362	0.0016	0.014229	yes	GO:0005515	protein binding	protein_coding
WBGene00018106	F36H5.8	II:1749983-1751597	N2	rnp-6	OK	1.26096	0.587297	-1.10236	-1.79272	0.00365	0.0274633	yes	GO:0005515	protein binding	protein_coding
WBGene00015613	C08F1.10	II:1785261-1786277	N2	rnp-6	OK	19.9429	11.5749	-0.784875	-2.38199	5e-05	0.000725861	yes	GO:0016021; GO:0016020	integral component of membrane; membrane	protein_coding
WBGene00015610	C08F1.6	II:1787214-1788187	N2	rnp-6	OK	23.9908	14.819	-0.695029	-2.19361	0.00025	0.00303907	yes	GO:0016021; GO:0016020	integral component of membrane; membrane	protein_coding
WBGene00020537	fbxb-37	II:2091742-2093853	N2	rnp-6	OK	9.20071	6.05454	-0.603727	-1.66094	0.0048	0.0339756	yes			protein_coding
WBGene00016553	C40A11.10	II:2136531-2137300	N2	rnp-6	OK	12.2186	4.21571	-1.53523	-2.87932	0.0001	0.00135972	yes
WBGene00016549	C40A11.6	II:2144292-2145582	N2	rnp-6	OK	5.43163	2.44739	-1.15014	-2.36883	0.00055	0.00597832	yes	GO:0051260; GO:0005515	protein binding; protein homooligomerization	protein_coding
WBGene00019587	K09F6.4	II:2262196-2265461	N2	rnp-6	OK	0.479356	1.02447	1.0957	2.12485	0.00055	0.00597832	yes	GO:0016021; GO:0016020	integral component of membrane; membrane	protein_coding
WBGene00019589	K09F6.6	II:2274875-2279146	N2	rnp-6	OK	0.551187	1.19786	1.11985	2.39466	5e-05	0.000725861	yes	GO:0005634	nucleus	protein_coding
WBGene00019591	fbxc-25	II:2294655-2296103	N2	rnp-6	OK	5.40419	3.46642	-0.640635	-1.61558	0.0052	0.0361513	yes			protein_coding
WBGene00015112	B0281.5	II:2299847-2300882	N2	rnp-6	OK	49.2462	27.4041	-0.845619	-2.91245	5e-05	0.000725861	yes	GO:0051260; GO:0005515	protein binding; protein homooligomerization	protein_coding
WBGene00022870	ZK1240.5	II:2316162-2318124	N2	rnp-6	OK	0.608056	1.43489	1.23867	2.04553	0.0007	0.00728567	yes	GO:0008270; GO:0005515; GO:0005622	protein binding; intracellular; zinc ion binding	protein_coding
WBGene00018353	fbxa-182	II:2409642-2412741	N2	rnp-6	OK	2.98827	5.55131	0.893518	2.5604	5e-05	0.000725861	yes			protein_coding
WBGene00045457	F33H12.7	II:2586076-2586911	N2	rnp-6	OK	15.0218	27.6473	0.88008	2.4761	0.0002	0.00250605	yes			protein_coding
WBGene00017251	fbxb-105	II:2769793-2770888	N2	rnp-6	OK	4.18991	2.09483	-1.00009	-2.15044	0.00045	0.00504819	yes	GO:0005515	protein binding	protein_coding
WBGene00019687	K12H6.7	II:2834952-2836628	N2	rnp-6	OK	5.29594	3.26786	-0.696538	-1.60824	0.0069	0.0450085	yes			protein_coding
WBGene00022713	ZK355.3	II:2927016-2927633	N2	rnp-6	OK	0	0.614028	inf		5e-05	0.000725861	yes			protein_coding
WBGene00005180	Y25C1A.14,srg-23	II:3093901-3096957	N2	rnp-6	OK	4.0548	2.09728	-0.951113	-1.87595	0.0013	0.0120757	yes	GO:0007606; GO:0004888; GO:0016021; GO:0016020; GO:0007165	sensory perception of chemical stimulus; transmembrane signaling receptor activity; signal transduction; integral component of membrane; membrane	protein_coding
WBGene00194985	Y25C1A.14,srg-23	II:3093901-3096957	N2	rnp-6	OK	4.0548	2.09728	-0.951113	-1.87595	0.0013	0.0120757	yes			protein_coding
WBGene00194717	ZC239.22	II:3219686-3220774	N2	rnp-6	OK	3.05225	5.40463	0.824321	1.57953	0.0076	0.0482968	yes			protein_coding
WBGene00022572	ZC239.14	II:3221124-3222010	N2	rnp-6	OK	1.34785	3.79893	1.49494	2.65572	0.0001	0.00135972	yes	GO:0051260; GO:0005515	protein binding; protein homooligomerization	protein_coding
WBGene00015913	C17F4.7	II:3245086-3246015	N2	rnp-6	OK	1585.87	2023.29	0.351424	1.60984	0.0046	0.032894	yes			protein_coding
WBGene00015912	fbxc-50	II:3246314-3248118	N2	rnp-6	OK	43.1861	58.5688	0.439565	1.74392	0.0019	0.0163938	yes			protein_coding
WBGene00001544	gcy-19	II:3250984-3259354	N2	rnp-6	OK	0.502505	0.835688	0.733829	1.55127	0.00715	0.0462067	yes	GO:0006468; GO:0009190; GO:0035556; GO:0016021; GO:0016020; GO:0016849; GO:0000166; GO:0016829; GO:0007165; GO:0005886; GO:0004672; GO:0008074; GO:0006182; GO:0004383; GO:0005524; GO:0005525	signal transduction; phosphorus-oxygen lyase activity; protein phosphorylation; membrane; lyase activity; cyclic nucleotide biosynthetic process; protein kinase activity; guanylate cyclase activity; cGMP biosynthetic process; intracellular signal transduction; ATP binding; GTP binding; guanylate cyclase complex, soluble; nucleotide binding; integral component of membrane; plasma membrane	protein_coding
WBGene00021590	Y46D2A.2	II:3321059-3323181	N2	rnp-6	OK	25.3736	16.0988	-0.656376	-2.22616	0.0001	0.00135972	yes	GO:0045087; GO:0045121	innate immune response; membrane raft	protein_coding
WBGene00206522	F14D2.19	II:3335440-3337225	N2	rnp-6	OK	1.15525	0.55435	-1.05934	-1.68509	0.00645	0.0426741	yes			protein_coding
WBGene00044811	F12E12.11	II:3741883-3743819	N2	rnp-6	OK	12.3242	23.3679	0.92303	2.14279	0.0001	0.00135972	yes	GO:0055114; GO:0016491	oxidation-reduction process; oxidoreductase activity	protein_coding
WBGene00020777	T24E12.10	II:3765086-3773191	N2	rnp-6	OK	0.250767	0.459608	0.874057	1.58584	0.00795	0.0499487	yes			protein_coding
WBGene00019859	R03H10.7	II:4177248-4178927	N2	rnp-6	OK	0.407489	1.16115	1.51072	2.22928	0.0007	0.00728567	yes			protein_coding
WBGene00045297	fbxc-43	II:4234949-4235982	N2	rnp-6	OK	1.60562	3.95397	1.30017	2.52728	5e-05	0.000725861	yes			protein_coding
WBGene00015116	B0286.3	II:4368489-4372568	N2	rnp-6	OK	11.2312	17.0243	0.600084	1.97292	0.0007	0.00728567	yes	GO:0004638; GO:0016829; GO:0016831; GO:0000166; GO:0004639; GO:0003824; GO:0006189; GO:0042802; GO:0008152; GO:0006164; GO:0016874; GO:0005524	carboxy-lyase activity; phosphoribosylaminoimidazole carboxylase activity; purine nucleotide biosynthetic process; lyase activity; catalytic activity; identical protein binding; metabolic process; ligase activity; ATP binding; 'de novo' IMP biosynthetic process; nucleotide binding; phosphoribosylaminoimidazolesuccinocarboxamide synthase activity	protein_coding
WBGene00044383	T05A7.11	II:4659284-4665445	N2	rnp-6	OK	0.735332	0.357518	-1.04038	-2.00066	0.00095	0.00937283	yes	GO:0036065; GO:0006486; GO:0016020; GO:0008417; GO:0000139; GO:0046920	protein glycosylation; alpha-(1->3)-fucosyltransferase activity; Golgi membrane; membrane; fucosylation; fucosyltransferase activity	protein_coding
WBGene00017386	nspd-5	II:4860062-4860407	N2	rnp-6	OK	1.34458	4.6026	1.77529	2.07546	0.00235	0.0194563	yes			protein_coding
WBGene00000609	col-20	II:4869606-4870791	N2	rnp-6	OK	925.797	1248.01	0.430857	1.9534	0.0008	0.00816818	yes	GO:0016021; GO:0016020; GO:0005581; GO:0042302	structural constituent of cuticle; collagen trimer; integral component of membrane; membrane	protein_coding
WBGene00019895	aagr-2	II:4914493-4925248	N2	rnp-6	OK	229.578	168.317	-0.447807	-2.07121	0.0004	0.00457121	yes	GO:0016787; GO:0005975; GO:0005980; GO:0030246; GO:0016798; GO:0005764; GO:0003824; GO:0008152; GO:0004553; GO:0004558	hydrolase activity, acting on glycosyl bonds; carbohydrate binding; hydrolase activity, hydrolyzing O-glycosyl compounds; hydrolase activity; catalytic activity; carbohydrate metabolic process; alpha-1,4-glucosidase activity; glycogen catabolic process; metabolic process; lysosome	protein_coding
WBGene00206373	C27A2.12	II:5056227-5058113	N2	rnp-6	OK	1.249	0.611059	-1.03139	-1.72716	0.0053	0.0367133	yes	GO:0016311; GO:0003993	acid phosphatase activity; dephosphorylation	protein_coding
WBGene00017220	F07F6.8	II:5424141-5425733	N2	rnp-6	OK	76.9938	56.4615	-0.447473	-1.83171	0.00125	0.0117015	yes	GO:0042157; GO:0005576; GO:0008289; GO:0006869	extracellular region; lipid transport; lipoprotein metabolic process; lipid binding	protein_coding
WBGene00044296	F10C1.9	II:5743125-5745284	N2	rnp-6	OK	19.1481	10.5737	-0.856722	-2.40025	0.00015	0.00195025	yes			protein_coding
WBGene00002980	lgg-1	II:6346956-6347719	N2	rnp-6	OK	895.827	646.354	-0.470896	-2.18568	0.0001	0.00135972	yes	GO:0005737; GO:0040024; GO:0006914; GO:0006995; GO:0000421; GO:0000422; GO:0031410; GO:0005634; GO:0005776; GO:0005739; GO:0000045; GO:0012501; GO:0050830; GO:0005741; GO:0005515; GO:0008340; GO:0010940; GO:0005829; GO:0000407	dauer larval development; autophagosome membrane; positive regulation of necrotic cell death; cytosol; cytoplasm; cellular response to nitrogen starvation; autophagy; cytoplasmic vesicle; autophagosome assembly; nucleus; determination of adult lifespan; protein binding; mitochondrion; phagophore assembly site; defense response to Gram-positive bacterium; mitochondrial outer membrane; programmed c…	protein_coding
WBGene00019906	R05G9R.1	II:6509497-6514011	N2	rnp-6	OK	0.628491	0.184103	-1.77138	-2.68137	0.0001	0.00135972	yes			protein_coding
WBGene00016004	C18H9.6	II:6700657-6701625	N2	rnp-6	OK	133.825	75.0278	-0.834856	-3.40399	5e-05	0.000725861	yes			protein_coding
WBGene00016626	clhm-1	II:6868941-6870839	N2	rnp-6	OK	1.31318	0.517292	-1.34401	-2.01418	0.0013	0.0120757	yes	GO:0006810; GO:0005262; GO:0016021; GO:0016020; GO:0070588; GO:0006816; GO:0097730; GO:0040012; GO:0005887; GO:0005886; GO:0034765; GO:0005245; GO:0005244; GO:0006811	non-motile cilium; regulation of ion transmembrane transport; voltage-gated ion channel activity; voltage-gated calcium channel activity; integral component of plasma membrane; calcium ion transport; regulation of locomotion; ion transport; calcium ion transmembrane transport; plasma membrane; calcium channel activity; membrane; integral component of membrane; transport	protein_coding
WBGene00016174	C27H5.4	II:7162443-7165841	N2	rnp-6	OK	8.69305	4.28941	-1.01908	-2.93557	5e-05	0.000725861	yes	GO:0016021; GO:0016020	integral component of membrane; membrane	protein_coding
WBGene00017131	E04F6.15	II:7208800-7210272	N2	rnp-6	OK	15.3787	7.80464	-0.97853	-2.82377	5e-05	0.000725861	yes	GO:0055114; GO:0016491	oxidation-reduction process; oxidoreductase activity	protein_coding
WBGene00017127	E04F6.8	II:7210746-7211466	N2	rnp-6	OK	102.191	74.1589	-0.46257	-1.56948	0.00525	0.0364418	yes			protein_coding
WBGene00018393	msra-1	II:7359960-7364107	N2	rnp-6	OK	64.7485	234.733	1.8581	6.53914	5e-05	0.000725861	yes	GO:0008113; GO:0033744; GO:0016671; GO:0006979; GO:0055114; GO:0030091	L-methionine:thioredoxin-disulfide S-oxidoreductase activity; oxidoreductase activity, acting on a sulfur group of donors, disulfide as acceptor; protein repair; oxidation-reduction process; response to oxidative stress; peptide-methionine (S)-S-oxide reductase activity	protein_coding
WBGene00006956	wrt-10	II:7533299-7534514	N2	rnp-6	OK	17.5883	11.4357	-0.621074	-1.88167	0.0014	0.0128195	yes			protein_coding
WBGene00020114	pde-4	II:7627278-7651295	N2	rnp-6	OK	4.30011	6.25746	0.541203	1.60403	0.00525	0.0364418	yes	; GO:0016787; GO:0040013; GO:0030818; GO:0008081; GO:0004114; GO:0004115; GO:0016021; GO:0016020; GO:0043951; GO:0045202; GO:0006198; GO:0030431; GO:0046872; GO:0007165	; synapse; negative regulation of cAMP-mediated signaling; hydrolase activity; signal transduction; negative regulation of cAMP biosynthetic process; negative regulation of locomotion; phosphoric diester hydrolase activity; 3',5'-cyclic-nucleotide phosphodiesterase activity; metal ion binding; membrane; sleep; cAMP catabolic process; integral component of membrane; 3',5'-cyclic-AMP phosphodiester…	protein_coding
WBGene00003730	nhx-2	II:7690706-7693957	N2	rnp-6	OK	52.1226	38.5743	-0.434271	-1.84985	0.00135	0.0124346	yes	GO:0090087; GO:0098719; GO:1902600; GO:0019915; GO:0051453; GO:0000003; GO:0071805; GO:0006885; GO:0016021; GO:0016020; GO:0015297; GO:2000193; GO:0016324; GO:0006812; GO:0006811; GO:0006810; GO:0015299; GO:0006814; GO:0005886; GO:0008340; GO:0055085; GO:0040010; GO:0043051; GO:0002119; GO:0040018; GO:0015386; GO:0015385	cation transport; positive regulation of multicellular organism growth; positive regulation of growth rate; lipid storage; apical plasma membrane; solute:proton antiporter activity; regulation of peptide transport; sodium:proton antiporter activity; regulation of intracellular pH; plasma membrane; regulation of pharyngeal pumping; ion transport; positive regulation of fatty acid transport; antipo…	protein_coding
WBGene00015063	B0228.6	II:7754146-7755156	N2	rnp-6	OK	12.7836	6.84296	-0.901604	-2.4331	0.0001	0.00135972	yes	GO:0016021; GO:0016020	integral component of membrane; membrane	protein_coding
WBGene00015512	mthf-1	II:7772463-7777827	N2	rnp-6	OK	85.303	126.867	0.572644	2.62984	5e-05	0.000725861	yes	; GO:0005829; GO:0006555; GO:0035999; GO:0004489; GO:0006730; GO:0055114; GO:0016491	; methylenetetrahydrofolate reductase (NAD(P)H) activity; one-carbon metabolic process; cytosol; oxidoreductase activity; methionine metabolic process; oxidation-reduction process; tetrahydrofolate interconversion	protein_coding
WBGene00003813	nrf-6	II:8028953-8032708	N2	rnp-6	OK	41.4102	27.689	-0.580673	-2.47044	5e-05	0.000725861	yes	GO:0006810; GO:0006869; GO:0016021; GO:0016020; GO:0008289; GO:0016747; GO:0007275	lipid binding; membrane; lipid transport; transferase activity, transferring acyl groups other than amino-acyl groups; multicellular organism development; integral component of membrane; transport	protein_coding
WBGene00004723	sap-49	II:8034344-8035767	N2	rnp-6	OK	51.6555	66.8972	0.373024	1.55811	0.00655	0.043217	yes	GO:0005515; GO:0005634; GO:0003723; GO:0003676; GO:0008380; GO:0005681; GO:0006397	nucleic acid binding; RNA binding; RNA splicing; mRNA processing; spliceosomal complex; nucleus; protein binding	protein_coding
WBGene00003089	ltd-1	II:8088493-8092754	N2	rnp-6	OK	3.47661	2.27169	-0.613912	-1.65606	0.00355	0.0268498	yes	GO:0005737; ; GO:0055120; GO:0003674; GO:0008270; GO:0005911; GO:0061061; GO:0046872	; cell-cell junction; cytoplasm; molecular_function; striated muscle dense body; zinc ion binding; metal ion binding; muscle structure development	protein_coding
WBGene00000653	col-77	II:8358227-8359378	N2	rnp-6	OK	0.648921	1.77883	1.45482	2.18849	0.0006	0.00643061	yes	GO:0016021; GO:0016020; GO:0005581; GO:0042302	structural constituent of cuticle; collagen trimer; integral component of membrane; membrane	protein_coding
WBGene00000615	col-38	II:8568032-8569088	N2	rnp-6	OK	4.2601	6.67083	0.646977	1.60001	0.00555	0.0380172	yes	GO:0005581; GO:0042302	structural constituent of cuticle; collagen trimer	protein_coding
WBGene00001505	fut-1	II:8756290-8758723	N2	rnp-6	OK	8.37408	5.24677	-0.674502	-1.97051	0.0008	0.00816818	yes	GO:0036065; GO:0005794; GO:0046920; GO:0006486; GO:0018392; GO:0016021; GO:0016020; GO:0008417; GO:0000139; GO:0016740; GO:0016757; GO:0017060; GO:0032580; GO:0046872; GO:0016051	transferase activity, transferring glycosyl groups; protein glycosylation; Golgi apparatus; Golgi cisterna membrane; alpha-(1->3)-fucosyltransferase activity; transferase activity; glycoprotein 3-alpha-L-fucosyltransferase activity; 3-galactosyl-N-acetylglucosaminide 4-alpha-L-fucosyltransferase activity; Golgi membrane; carbohydrate biosynthetic process; fucosyltransferase activity; metal ion bi…	protein_coding
WBGene00008560	pho-13	II:8801129-8806945	N2	rnp-6	OK	3.48576	8.58934	1.30107	3.47227	5e-05	0.000725861	yes	GO:0016311; GO:0003993	acid phosphatase activity; dephosphorylation	protein_coding
WBGene00011977	T24B8.3	II:9059383-9061138	N2	rnp-6	OK	170.091	114.762	-0.567665	-2.35712	5e-05	0.000725861	yes			protein_coding
WBGene00167037	T24B8.3	II:9059383-9061138	N2	rnp-6	OK	170.091	114.762	-0.567665	-2.35712	5e-05	0.000725861	yes
WBGene00011979	T24B8.5	II:9082681-9083142	N2	rnp-6	OK	51.8516	32.0259	-0.69515	-1.93875	0.0011	0.0105816	yes	GO:0045087	innate immune response	protein_coding
WBGene00007378	C06C3.8	II:9386583-9390900	N2	rnp-6	OK	0.846332	0.207778	-2.02618	-1.8908	0.0017	0.0149637	yes	GO:0004176; GO:0006508; GO:0005634; ; GO:0004252	; serine-type endopeptidase activity; proteolysis; ATP-dependent peptidase activity; nucleus	protein_coding
WBGene00014254	cyp-13A10	II:9660838-9662946	N2	rnp-6	OK	3.18749	4.99538	0.648173	1.77037	0.0024	0.0197654	yes	GO:0004497; GO:0016705; GO:0020037; GO:0016021; GO:0016020; GO:0005575; GO:0005506; GO:0046872; GO:0055114; GO:0016491	cellular_component; oxidoreductase activity; monooxygenase activity; oxidoreductase activity, acting on paired donors, with incorporation or reduction of molecular oxygen; metal ion binding; membrane; heme binding; iron ion binding; integral component of membrane; oxidation-reduction process	protein_coding
WBGene00011676	cyp-13A2	II:9783817-9787398	N2	rnp-6	OK	3.50722	5.31784	0.600514	1.63339	0.0045	0.0323767	yes	GO:0004497; GO:0020037; GO:0016705; GO:0005506; GO:0046872; GO:0055114; GO:0016491	oxidoreductase activity; iron ion binding; oxidoreductase activity, acting on paired donors, with incorporation or reduction of molecular oxygen; metal ion binding; heme binding; monooxygenase activity; oxidation-reduction process	protein_coding
WBGene00014838	cyp-13A9	II:9793753-9795541	N2	rnp-6	OK	0.217553	0.765293	1.81464	2.30304	0.00095	0.00937283	yes
WBGene00011671	cyp-13A4	II:9795847-9797740	N2	rnp-6	OK	0.239488	1.67199	2.80354	3.97058	5e-05	0.000725861	yes	GO:0004497; GO:0020037; GO:0016705; GO:0005506; GO:0046872; GO:0055114; GO:0016491	oxidoreductase activity; iron ion binding; oxidoreductase activity, acting on paired donors, with incorporation or reduction of molecular oxygen; metal ion binding; heme binding; monooxygenase activity; oxidation-reduction process	protein_coding
WBGene00011672	cyp-13A5	II:9798275-9800363	N2	rnp-6	OK	5.47055	20.5263	1.90771	6.12984	5e-05	0.000725861	yes	GO:0004497; GO:0020037; GO:0016705; GO:0005506; GO:0046872; GO:0055114; GO:0016491	oxidoreductase activity; iron ion binding; oxidoreductase activity, acting on paired donors, with incorporation or reduction of molecular oxygen; metal ion binding; heme binding; monooxygenase activity; oxidation-reduction process	protein_coding
WBGene00011673	cyp-13A6	II:9800760-9802721	N2	rnp-6	OK	0.732268	1.62333	1.14851	2.18721	0.0003	0.00356315	yes	GO:0004497; GO:0020037; GO:0016705; GO:0005506; GO:0046872; GO:0055114; GO:0016491	oxidoreductase activity; iron ion binding; oxidoreductase activity, acting on paired donors, with incorporation or reduction of molecular oxygen; metal ion binding; heme binding; monooxygenase activity; oxidation-reduction process	protein_coding
WBGene00014159	arrd-4	II:9837088-9838302	N2	rnp-6	OK	4.58017	2.85484	-0.681989	-1.58641	0.0072	0.0464409	yes			protein_coding
WBGene00014131	sdz-38	II:9980885-9981752	N2	rnp-6	OK	2.20553	0.805888	-1.45248	-2.11634	0.0017	0.0149637	yes	GO:0003676	nucleic acid binding	protein_coding
WBGene00003773	nlt-1	II:9991159-10001142	N2	rnp-6	OK	322.869	176.584	-0.870594	-3.36978	5e-05	0.000725861	yes	GO:0006810; GO:0005777; GO:0008289	lipid binding; transport; peroxisome	protein_coding
WBGene00006651	tts-2	II:10201124-10202230	N2	rnp-6	OK	4.71931	2.13856	-1.14193	-2.28358	0.00025	0.00303907	yes
WBGene00007414	C07E3.3	II:10353632-10357518	N2	rnp-6	OK	5.51726	8.72294	0.660863	1.70241	0.0024	0.0197654	yes	; GO:0005515	; protein binding	protein_coding
WBGene00219806	C07E3.3	II:10353632-10357518	N2	rnp-6	OK	5.51726	8.72294	0.660863	1.70241	0.0024	0.0197654	yes
WBGene00014046	clec-60	II:10480101-10481846	N2	rnp-6	OK	0.803075	1.81221	1.17414	2.13584	0.0005	0.00551085	yes	GO:0050830; GO:0030246	defense response to Gram-positive bacterium; carbohydrate binding	protein_coding
WBGene00014667	C06A1.4	II:10574841-10578193	N2	rnp-6	OK	63.6743	83.9786	0.39931	1.83385	0.0015	0.0135324	yes
WBGene00000657	col-81	II:11012394-11013779	N2	rnp-6	OK	15.834	34.3664	1.11797	3.72793	5e-05	0.000725861	yes	GO:0016021; GO:0016020; GO:0005581; GO:0042302	structural constituent of cuticle; collagen trimer; integral component of membrane; membrane	protein_coding
WBGene00004300	ram-2	II:11015587-11016842	N2	rnp-6	OK	2.78885	5.70594	1.03279	2.36947	0.00015	0.00195025	yes	GO:0045138; GO:0016021; GO:0016020; GO:0042302; GO:0007423	structural constituent of cuticle; sensory organ development; integral component of membrane; nematode male tail tip morphogenesis; membrane	protein_coding
WBGene00004227	ptr-13	II:11157290-11162331	N2	rnp-6	OK	5.26093	7.41983	0.496068	1.60394	0.0057	0.0388114	yes	GO:0016021; GO:0016020; GO:0018996	molting cycle, collagen and cuticulin-based cuticle; integral component of membrane; membrane	protein_coding
WBGene00007041	tag-180	II:11323048-11329429	N2	rnp-6	OK	0.937987	1.58948	0.760912	1.87344	0.0015	0.0135324	yes			protein_coding
WBGene00006915	vha-6	II:11435210-11438464	N2	rnp-6	OK	154.643	87.3585	-0.823922	-3.80572	5e-05	0.000725861	yes	GO:0070072; GO:0006810; GO:0015992; GO:0015991; GO:0016324; GO:0051117; GO:0016021; GO:0016020; GO:0045177; GO:0015078; GO:0033179; GO:0000220; GO:0007035; GO:0002119; GO:0046961; GO:0015986; GO:0016471; GO:0006811	nematode larval development; proton-transporting ATPase activity, rotational mechanism; proton-transporting V-type ATPase, V0 domain; ATP synthesis coupled proton transport; ATPase binding; proton transport; ion transport; vacuolar proton-transporting V-type ATPase, V0 domain; apical part of cell; vacuolar proton-transporting V-type ATPase complex; membrane; apical plasma membrane; vacuolar proto…	protein_coding
WBGene00007143	B0334.3	II:11488286-11493021	N2	rnp-6	OK	99.9866	71.5672	-0.482436	-2.14697	0.00015	0.00195025	yes	GO:0003824; GO:0000287; GO:0030976	thiamine pyrophosphate binding; catalytic activity; magnesium ion binding	protein_coding
WBGene00007028	trr-1	II:11661579-11675927	N2	rnp-6	OK	43.9705	55.4301	0.334132	1.54452	0.0071	0.0459858	yes	GO:0040010; GO:0016301; GO:0016573; GO:0000123; GO:0006281; GO:0016310; GO:0005634; GO:0030154; GO:0000793; GO:0007283; GO:0040027; GO:0005488; GO:0005515; GO:0005694; GO:0007275; GO:0000003	positive regulation of growth rate; protein binding; histone acetyltransferase complex; binding; phosphorylation; cell differentiation; histone acetylation; kinase activity; nucleus; negative regulation of vulval development; reproduction; DNA repair; multicellular organism development; spermatogenesis; chromosome; condensed chromosome	protein_coding
WBGene00009691	F44E5.4	II:11757105-11759311	N2	rnp-6	OK	1.11472	0.394555	-1.49838	-2.56119	5e-05	0.000725861	yes	GO:0005524; GO:0000166	nucleotide binding; ATP binding	protein_coding
WBGene00012221	W03C9.5	II:11967047-11967533	N2	rnp-6	OK	117.223	80.7032	-0.538564	-1.85573	0.00135	0.0124346	yes			protein_coding
WBGene00004167	pqn-87	II:12203308-12221788	N2	rnp-6	OK	74.6904	96.5172	0.369864	1.71713	0.0024	0.0197654	yes	; GO:0005515	; protein binding	protein_coding
WBGene00013284	daf-22	II:12423511-12425694	N2	rnp-6	OK	133.914	100.516	-0.413874	-1.85234	0.001	0.0097769	yes	GO:0048639; GO:0043053; GO:0006637; GO:0042811; GO:0006869; GO:0033814; GO:0043054; GO:0006810; GO:0005777; GO:0008289; GO:1904070; GO:0003824; GO:0016740; GO:0050920; GO:0016747; GO:0008152; GO:0000038; GO:0061063; GO:0010888; GO:0019236; GO:0008355	acyl-CoA metabolic process; positive regulation of nematode larval development; dauer entry; lipid binding; ascaroside biosynthetic process; transferase activity; very long-chain fatty acid metabolic process; peroxisome; pheromone biosynthetic process; metabolic process; negative regulation of lipid storage; olfactory learning; response to pheromone; catalytic activity; lipid transport; transfera…	protein_coding
WBGene00012581	Y38E10A.3	II:12573995-12574768	N2	rnp-6	OK	4.75528	2.76774	-0.780823	-1.61841	0.00635	0.042158	yes			protein_coding
WBGene00012592	Y38E10A.14	II:12623188-12624506	N2	rnp-6	OK	6.71551	19.1831	1.51427	4.64288	5e-05	0.000725861	yes			protein_coding
WBGene00012896	snrp-200	II:12726958-12736875	N2	rnp-6	OK	27.2978	36.902	0.434913	1.99692	0.0004	0.00457121	yes	GO:0016787; GO:0003676; GO:0005634; GO:0000398; GO:0000166; GO:0005681; GO:0005515; GO:0004386; GO:0008380; GO:0005524; GO:0006397	nucleic acid binding; hydrolase activity; protein binding; RNA splicing; mRNA processing; spliceosomal complex; nucleus; ATP binding; helicase activity; nucleotide binding; mRNA splicing, via spliceosome	protein_coding
WBGene00012897	pisy-1	II:12737030-12738334	N2	rnp-6	OK	79.7273	104.972	0.396856	1.65498	0.0047	0.0334361	yes	GO:0005794; GO:0006629; GO:0016780; GO:0008654; GO:0016021; GO:0016020; GO:0016740; GO:0003881; GO:0006661	phospholipid biosynthetic process; Golgi apparatus; phosphotransferase activity, for other substituted phosphate groups; transferase activity; phosphatidylinositol biosynthetic process; CDP-diacylglycerol-inositol 3-phosphatidyltransferase activity; lipid metabolic process; membrane; integral component of membrane	protein_coding
WBGene00012608	Y38F1A.6	II:12994357-12996571	N2	rnp-6	OK	214.068	168.774	-0.342976	-1.5563	0.0067	0.0439419	yes	GO:0015993; GO:0005829; GO:0004022; GO:0047988; GO:0005739; GO:0046872; GO:0055114; GO:0016491	cytosol; molecular hydrogen transport; alcohol dehydrogenase (NAD) activity; oxidoreductase activity; metal ion binding; mitochondrion; hydroxyacid-oxoacid transhydrogenase activity; oxidation-reduction process	protein_coding
WBGene00012610	Y38F1A.8	II:12997985-13000853	N2	rnp-6	OK	9.00643	4.25677	-1.0812	-2.81154	5e-05	0.000725861	yes	GO:0016021; GO:0016020	integral component of membrane; membrane	protein_coding
WBGene00003144	max-2	II:13014330-13025838	N2	rnp-6	OK	31.1997	40.3294	0.370298	1.54375	0.0064	0.0424098	yes	GO:0016310; GO:0030154; GO:0030425; GO:0035262; GO:0042981; GO:0005737; GO:0007257; GO:0007346; GO:0043204; GO:0031435; GO:0000166; GO:0004674; GO:0016740; GO:0046688; GO:0004672; GO:0046872; GO:0005524; GO:0006468; GO:0016301; GO:0007254; GO:0040039; GO:0030036; GO:0007266; GO:0042995; GO:0007506; GO:0007399; GO:0048365	cytoplasm; dendrite; Rac GTPase binding; nucleotide binding; cell projection; protein kinase activity; perikaryon; regulation of mitotic cell cycle; regulation of apoptotic process; kinase activity; ATP binding; actin cytoskeleton organization; metal ion binding; mitogen-activated protein kinase kinase kinase binding; gonad morphogenesis; JNK cascade; activation of JUN kinase activity; response t…	protein_coding
WBGene00000661	col-86,rict-1	II:13096008-13116801	N2	rnp-6	OK	20.48	31.5215	0.622125	2.53773	5e-05	0.000725861	yes	GO:0016021; GO:0016020; GO:0005581; GO:0042302	structural constituent of cuticle; collagen trimer; integral component of membrane; membrane	protein_coding
WBGene00009245	col-86,rict-1	II:13096008-13116801	N2	rnp-6	OK	20.48	31.5215	0.622125	2.53773	5e-05	0.000725861	yes	GO:0042325; GO:0031932; GO:0030950; GO:0031532; GO:0031929; GO:0005488; GO:0030010; GO:0032956; GO:0048382; GO:0051897; GO:0043085; GO:0008047	actin cytoskeleton reorganization; mesendoderm development; establishment or maintenance of actin cytoskeleton polarity; TOR signaling; binding; positive regulation of protein kinase B signaling; establishment of cell polarity; regulation of actin cytoskeleton organization; TORC2 complex; regulation of phosphorylation; positive regulation of catalytic activity; enzyme activator activity	protein_coding
WBGene00013008	clec-146	II:13590558-13593797	N2	rnp-6	OK	18.3837	11.9149	-0.625653	-1.73455	0.00275	0.0219448	yes	GO:0030246	carbohydrate binding	protein_coding
WBGene00001772	gst-24	II:13610442-13611342	N2	rnp-6	OK	4.00604	68.1704	4.0889	11.0545	5e-05	0.000725861	yes	GO:0016740; GO:0045087; GO:0005515	transferase activity; protein binding; innate immune response	protein_coding
WBGene00001763	gst-15	II:13611770-13613152	N2	rnp-6	OK	2.34025	5.14831	1.13744	2.28614	0.0002	0.00250605	yes	GO:0016740; GO:0005515	transferase activity; protein binding	protein_coding
WBGene00001767	gst-19	II:13625543-13627141	N2	rnp-6	OK	5.12664	1.12844	-2.18369	-3.51718	5e-05	0.000725861	yes	GO:0016740; GO:0005515	transferase activity; protein binding	protein_coding
WBGene00008577	F08G2.5	II:13832852-13833631	N2	rnp-6	OK	10.2222	21.4258	1.06764	3.10166	5e-05	0.000725861	yes	GO:0045087; GO:0005515	innate immune response; protein binding	protein_coding
WBGene00012726	Y39G8B.5	II:13987615-13991838	N2	rnp-6	OK	0.174844	0.461625	1.40065	1.85533	0.00375	0.0280629	yes	GO:0018107; GO:0006468; GO:0018105; GO:0004674; GO:0004672; GO:0005524	protein phosphorylation; peptidyl-serine phosphorylation; protein kinase activity; ATP binding; protein serine/threonine kinase activity; peptidyl-threonine phosphorylation	protein_coding
WBGene00008494	F01D5.3	II:13999157-14000065	N2	rnp-6	OK	6.72968	3.48066	-0.951175	-1.78944	0.00315	0.0244316	yes	GO:0045087	innate immune response	protein_coding
WBGene00007313	clec-147	II:14535446-14537579	N2	rnp-6	OK	3.91206	1.74476	-1.1649	-2.26521	0.0003	0.00356315	yes	GO:0030246	carbohydrate binding	protein_coding
WBGene00007244	C01G12.3	II:14581464-14582360	N2	rnp-6	OK	6.50426	2.97914	-1.12649	-2.37126	0.0002	0.00250605	yes			protein_coding
WBGene00006787	unc-52	II:14647326-14666943	N2	rnp-6	OK	6.96058	11.537	0.728991	2.58778	5e-05	0.000725861	yes	GO:0040011; GO:0007517; GO:0005604; GO:0040017; GO:1905905; GO:0048644; GO:0031581; GO:0002119; GO:0060279; GO:0005198; GO:0009792; GO:0003674; GO:0005509; GO:0005515; GO:0060465; GO:0055120; GO:0030239; GO:0016477; GO:0008543; GO:0005578; GO:0005576	calcium ion binding; muscle organ morphogenesis; fibroblast growth factor receptor signaling pathway; embryo development ending in birth or egg hatching; cell migration; extracellular region; protein binding; molecular_function; striated muscle dense body; muscle organ development; structural molecule activity; hemidesmosome assembly; pharyngeal gland morphogenesis; myofibril assembly; basement m…	protein_coding
WBGene00007480	glna-1	II:14720551-14733524	N2	rnp-6	OK	1.98143	2.97232	0.585046	1.54224	0.0077	0.0487669	yes	GO:0004359; GO:0006541; GO:0005739; GO:0006537; GO:0006543; GO:0005515; GO:0005759	glutaminase activity; protein binding; glutamate biosynthetic process; mitochondrial matrix; glutamine metabolic process; mitochondrion; glutamine catabolic process	protein_coding
WBGene00044728	Y53F4B.45	II:15037988-15048907	N2	rnp-6	OK	38.4974	23.0397	-0.740636	-1.64786	0.0062	0.0413837	yes
WBGene00001776	gst-28	II:15166194-15167406	N2	rnp-6	OK	14.3918	7.01577	-1.03657	-2.65225	5e-05	0.000725861	yes	GO:0016740; GO:0005515	transferase activity; protein binding	protein_coding
WBGene00016219	C29F9.4	III:120491-124686	N2	rnp-6	OK	29.6256	21.5029	-0.462312	-1.56852	0.007	0.0454744	yes			protein_coding
WBGene00021909	Y55B1BL.1	III:402423-405614	N2	rnp-6	OK	15.4925	23.8088	0.619919	1.65251	0.0043	0.0312605	yes			protein_coding
WBGene00020701	T22F7.1	III:542065-546535	N2	rnp-6	OK	7.58001	3.86054	-0.973396	-2.76548	5e-05	0.000725861	yes	GO:0008514; GO:0016021; GO:0016020; GO:0015711; GO:0005887; GO:0055085	integral component of plasma membrane; organic anion transport; organic anion transmembrane transporter activity; integral component of membrane; membrane; transmembrane transport	protein_coding
WBGene00000895	dac-1	III:816245-821729	N2	rnp-6	OK	0.744982	1.41371	0.924211	1.63066	0.0042	0.0306843	yes	; GO:0051123; GO:0001075; GO:0005634; GO:0006355; GO:0005667; GO:0007275	; RNA polymerase II transcriptional preinitiation complex assembly; regulation of transcription, DNA-templated; transcription factor activity, RNA polymerase II core promoter sequence-specific binding involved in preinitiation complex assembly; nucleus; transcription factor complex; multicellular organism development	protein_coding
WBGene00006615	trp-2	III:991880-1001907	N2	rnp-6	OK	0.643765	1.35023	1.0686	2.25635	0.00015	0.00195025	yes	GO:0015279; GO:0006810; GO:0005887; GO:0005262; GO:0051480; GO:0070588; GO:0006811; GO:0016020; GO:0005216; GO:0055085; GO:0005515; GO:0006828; GO:0016021	regulation of cytosolic calcium ion concentration; manganese ion transport; calcium channel activity; integral component of plasma membrane; protein binding; store-operated calcium channel activity; ion channel activity; integral component of membrane; ion transport; calcium ion transmembrane transport; membrane; transmembrane transport; transport	protein_coding
WBGene00019914	clec-150	III:1002706-1006247	N2	rnp-6	OK	166.798	66.784	-1.32053	-5.7039	5e-05	0.000725861	yes	GO:0030246	carbohydrate binding	protein_coding
WBGene00021337	Y34F4.2	III:1010534-1011374	N2	rnp-6	OK	1.5994	5.18009	1.69544	2.86806	5e-05	0.000725861	yes	GO:0016021; GO:0016020	integral component of membrane; membrane	protein_coding
WBGene00022104	Y71D11A.3	III:1116462-1142921	N2	rnp-6	OK	4.35461	2.52972	-0.783567	-1.74245	0.0042	0.0306843	yes	GO:0016787; GO:0016829; GO:0016831; GO:0006568; GO:0001760; GO:1904985; GO:1904984; GO:0046872; GO:0005829	carboxy-lyase activity; lyase activity; hydrolase activity; tryptophan metabolic process; cytosol; metal ion binding; regulation of quinolinate biosynthetic process; negative regulation of quinolinate biosynthetic process; aminocarboxymuconate-semialdehyde decarboxylase activity	protein_coding
WBGene00004891	smr-1	III:1143061-1145220	N2	rnp-6	OK	77.4778	108.297	0.48314	1.9818	0.0003	0.00356315	yes			protein_coding
WBGene00022497	Y119D3B.21	III:1214951-1215287	N2	rnp-6	OK	941.678	1571.05	0.738423	3.38192	5e-05	0.000725861	yes			protein_coding
WBGene00019715	M01G5.1	III:1496398-1508554	N2	rnp-6	OK	33.0464	43.0821	0.382597	1.66265	0.0035	0.0265526	yes			protein_coding
WBGene00021256	Y22D7AR.2	III:1705945-1713729	N2	rnp-6	OK	0.435751	1.02624	1.23579	2.70768	5e-05	0.000725861	yes	GO:0016021; GO:0016020; GO:0005515	protein binding; integral component of membrane; membrane	protein_coding
WBGene00021443	Y39A3CL.7	III:1824918-1833952	N2	rnp-6	OK	35.4344	47.4886	0.422428	1.68195	0.00355	0.0268498	yes			protein_coding
WBGene00021703	cpt-3	III:2082818-2088272	N2	rnp-6	OK	24.4229	36.4166	0.57636	2.37156	5e-05	0.000725861	yes	GO:0016021; GO:0016020; GO:0016746; GO:0016740	transferase activity; transferase activity, transferring acyl groups; integral component of membrane; membrane	protein_coding
WBGene00016521	fbxa-62	III:2227706-2229228	N2	rnp-6	OK	1.00376	0.306145	-1.71312	-1.91511	0.00475	0.0337236	yes	GO:0005515	protein binding	protein_coding
WBGene00016520	C39B5.2	III:2233887-2236986	N2	rnp-6	OK	30.5098	20.0418	-0.606257	-2.15044	0.0003	0.00356315	yes	GO:0005515	protein binding	protein_coding
WBGene00021019	W04B5.2	III:2424354-2427738	N2	rnp-6	OK	2.55974	1.50223	-0.768895	-1.61733	0.0062	0.0413837	yes	GO:0016021; GO:0016020	integral component of membrane; membrane	protein_coding
WBGene00017103	klo-2	III:2446222-2448643	N2	rnp-6	OK	3.51629	2.25359	-0.641825	-1.54485	0.0075	0.0478343	yes	GO:1901657; GO:0005975; GO:0008422; GO:0004553	glycosyl compound metabolic process; carbohydrate metabolic process; beta-glucosidase activity; hydrolase activity, hydrolyzing O-glycosyl compounds	protein_coding
WBGene00020100	mks-1	III:3186699-3192206	N2	rnp-6	OK	0.95152	0.427708	-1.15361	-1.69655	0.0048	0.0339756	yes	GO:1905515; GO:0008340; GO:0036064; GO:0035177; GO:0035869	non-motile cilium assembly; ciliary basal body; ciliary transition zone; determination of adult lifespan; larval foraging behavior	protein_coding
WBGene00003605	nhr-6	III:3573584-3578772	N2	rnp-6	OK	0.998521	1.93055	0.951146	2.18363	0.0001	0.00135972	yes	GO:0043565; GO:0035211; GO:0003700; GO:0005634; GO:0060278; GO:0006355; GO:0045944; GO:0008270; GO:0043401; GO:0003677; GO:0046872; GO:0006351	regulation of ovulation; steroid hormone mediated signaling pathway; regulation of transcription, DNA-templated; DNA binding; zinc ion binding; nucleus; metal ion binding; positive regulation of transcription from RNA polymerase II promoter; sequence-specific DNA binding; transcription, DNA-templated; spermathecum morphogenesis; DNA binding transcription factor activity	protein_coding
WBGene00007964	cyp-25A2	III:3835220-3837150	N2	rnp-6	OK	18.6198	30.1918	0.69732	2.58465	5e-05	0.000725861	yes	GO:0004497; GO:0020037; GO:0016705; GO:0005506; GO:0046872; GO:0055114; GO:0016491	oxidoreductase activity; iron ion binding; oxidoreductase activity, acting on paired donors, with incorporation or reduction of molecular oxygen; metal ion binding; heme binding; monooxygenase activity; oxidation-reduction process	protein_coding
WBGene00007966	maph-1.3	III:3844892-3848262	N2	rnp-6	OK	27.7226	35.9025	0.373019	1.5865	0.00705	0.0457217	yes			protein_coding
WBGene00009442	F35G12.5	III:4584582-4587315	N2	rnp-6	OK	26.7463	18.0234	-0.569471	-1.76901	0.0023	0.0191136	yes			protein_coding
WBGene00007167	rbg-3	III:4754431-4757019	N2	rnp-6	OK	83.0234	64.8426	-0.356577	-1.59231	0.00615	0.0411542	yes	GO:0005737; GO:0031338; GO:0090630; GO:0006886; GO:0005096; GO:0017137; GO:0012505	Rab GTPase binding; regulation of vesicle fusion; cytoplasm; endomembrane system; GTPase activator activity; activation of GTPase activity; intracellular protein transport	protein_coding
WBGene00007170	B0393.5	III:4765832-4778065	N2	rnp-6	OK	2.54572	1.31719	-0.950608	-2.38196	0.0003	0.00356315	yes	GO:0007160; GO:0016021; GO:0016020; GO:0005509; GO:0005515	calcium ion binding; protein binding; cell-matrix adhesion; integral component of membrane; membrane	protein_coding
WBGene00000767	coq-8	III:4863426-4866950	N2	rnp-6	OK	44.3733	57.6729	0.3782	1.6674	0.0037	0.027775	yes	GO:0016740; GO:0006744; GO:0005739; GO:0005524; GO:0000166	mitochondrion; transferase activity; ubiquinone biosynthetic process; nucleotide binding; ATP binding	protein_coding
WBGene00020094	wip-1	III:5018647-5021108	N2	rnp-6	OK	17.2098	24.143	0.488376	1.73805	0.00325	0.0250162	yes	GO:0003779; GO:0010172; GO:0005519; GO:0030334; GO:0031647	cytoskeletal regulatory protein binding; regulation of protein stability; embryonic body morphogenesis; regulation of cell migration; actin binding	protein_coding
WBGene00001076	dpy-17	III:5107329-5108589	N2	rnp-6	OK	122.955	80.9587	-0.602869	-2.37105	5e-05	0.000725861	yes	GO:0042302; GO:0042338	structural constituent of cuticle; cuticle development involved in collagen and cuticulin-based cuticle molting cycle	protein_coding
WBGene00189952	K10D2.8	III:5188725-5190175	N2	rnp-6	OK	3.00716	1.67616	-0.843244	-1.71626	0.0051	0.0356206	yes	GO:0005515	protein binding	protein_coding
WBGene00006946	prx-10	III:5236409-5240050	N2	rnp-6	OK	36.8228	27.6475	-0.413452	-1.67502	0.00455	0.0326223	yes	GO:0005737; GO:0005779; GO:0007031; GO:0016558; GO:0006436; GO:0005739; GO:0000166; GO:0004812; GO:0008270; GO:0005515; GO:0006418; GO:0005759; GO:0004830; GO:0016874; GO:0006412; GO:0005524	tRNA aminoacylation for protein translation; protein binding; mitochondrial matrix; zinc ion binding; cytoplasm; aminoacyl-tRNA ligase activity; tryptophanyl-tRNA aminoacylation; ATP binding; ligase activity; protein import into peroxisome matrix; mitochondrion; peroxisome organization; translation; nucleotide binding; integral component of peroxisomal membrane; tryptophan-tRNA ligase activity	protein_coding
WBGene00004095	pqe-1	III:5311245-5321732	N2	rnp-6	OK	66.0633	87.9317	0.412534	1.7273	0.0023	0.0191136	yes	; GO:0016787; GO:0004518; GO:0005634; GO:0090305; GO:0010629; GO:0003676; GO:0004527	; nucleic acid binding; hydrolase activity; nucleic acid phosphodiester bond hydrolysis; nucleus; nuclease activity; negative regulation of gene expression; exonuclease activity	protein_coding
WBGene00022664	ZK121.2	III:5341689-5344273	N2	rnp-6	OK	7.44236	5.01295	-0.570099	-1.66615	0.0039	0.0289822	yes	GO:0005515; GO:0003676	nucleic acid binding; protein binding	protein_coding
WBGene00020967	W03A5.1,W03A5.2	III:5406115-5413177	N2	rnp-6	OK	4.69581	2.64636	-0.827368	-1.784	0.00355	0.0268498	yes	GO:0005764; GO:0016021; GO:0016020	lysosome; integral component of membrane; membrane	protein_coding
WBGene00020966	W03A5.1,W03A5.2	III:5406115-5413177	N2	rnp-6	OK	4.69581	2.64636	-0.827368	-1.784	0.00355	0.0268498	yes	GO:0006468; GO:0005515; GO:0005524; GO:0004672	protein kinase activity; protein binding; ATP binding; protein phosphorylation	protein_coding
WBGene00003055	lon-1	III:5474477-5478382	N2	rnp-6	OK	28.0099	38.3221	0.452239	1.71212	0.0028	0.0222533	yes	GO:0040010; GO:0040015; GO:0005515; GO:0005576; GO:0005913; GO:0005887; GO:0032876; GO:0000003	positive regulation of growth rate; cell-cell adherens junction; negative regulation of DNA endoreduplication; extracellular region; protein binding; negative regulation of multicellular organism growth; integral component of plasma membrane; reproduction	protein_coding
WBGene00019831	R02F2.1	III:5501860-5506397	N2	rnp-6	OK	127.451	191.308	0.585952	2.68344	5e-05	0.000725861	yes			protein_coding
WBGene00003371	mlc-3	III:5565024-5567384	N2	rnp-6	OK	254.92	326.182	0.355635	1.53816	0.00655	0.043217	yes	GO:0016459; GO:0005863; GO:0005509	calcium ion binding; striated muscle myosin thick filament; myosin complex	protein_coding
WBGene00015081	B0244.6	III:5738007-5741554	N2	rnp-6	OK	0.925573	2.06968	1.16099	2.36744	0.00015	0.00195025	yes	GO:0004930; GO:0016021; GO:0016020; GO:0007165; GO:0004871; GO:0005886; GO:0007186	signal transduction; signal transducer activity; G-protein coupled receptor activity; membrane; G-protein coupled receptor signaling pathway; integral component of membrane; plasma membrane	protein_coding
WBGene00020438	T12A2.3	III:6240805-6241581	N2	rnp-6	OK	8.98556	5.27834	-0.767524	-1.86503	0.00135	0.0124346	yes			protein_coding
WBGene00017755	zip-8	III:6478958-6481236	N2	rnp-6	OK	50.1854	29.3759	-0.772634	-2.27129	0.00015	0.00195025	yes	; GO:0043565; GO:0003700; GO:0005575; GO:0006355; GO:0003674; GO:0008150	; regulation of transcription, DNA-templated; molecular_function; cellular_component; DNA binding transcription factor activity; biological_process; sequence-specific DNA binding	protein_coding
WBGene00017756	F23F12.12	III:6508131-6509502	N2	rnp-6	OK	10.8499	17.2677	0.670399	2.04261	0.0002	0.00250605	yes			protein_coding
WBGene00021503	ctsa-2	III:6612522-6615134	N2	rnp-6	OK	59.6085	40.9837	-0.540469	-2.26334	0.0002	0.00250605	yes	GO:0016787; GO:0045121; GO:0051603; GO:0016021; GO:0016020; GO:0004180; GO:0004185; GO:0006508; GO:0008233	carboxypeptidase activity; hydrolase activity; proteolysis involved in cellular protein catabolic process; serine-type carboxypeptidase activity; membrane raft; peptidase activity; membrane; proteolysis; integral component of membrane	protein_coding
WBGene00000998	dig-1	III:6746307-6794764	N2	rnp-6	OK	3.4679	4.81502	0.47348	2.11131	0.00025	0.00303907	yes	GO:0007399; GO:0008406; GO:0005578; GO:0003824; GO:0005576; GO:0005509; GO:0005515; GO:0007155; GO:0007275	calcium ion binding; extracellular region; catalytic activity; gonad development; protein binding; cell adhesion; proteinaceous extracellular matrix; nervous system development; multicellular organism development	protein_coding
WBGene00017389	lgc-38	III:7009145-7019574	N2	rnp-6	OK	0.496741	1.00157	1.0117	1.69629	0.0047	0.0334361	yes	GO:0006810; GO:1902476; GO:0005230; GO:0016020; GO:0005216; GO:0034220; GO:0006821; GO:0045202; GO:0005886; GO:0006811; GO:0004890; GO:0005254; GO:0016021; GO:0030054; GO:0007165	ion transport; synapse; ion transmembrane transport; chloride transmembrane transport; chloride transport; GABA-A receptor activity; signal transduction; chloride channel activity; ion channel activity; cell junction; extracellular ligand-gated ion channel activity; transport; membrane; integral component of membrane; plasma membrane	protein_coding
WBGene00003845	odd-1	III:7108321-7109310	N2	rnp-6	OK	1.7554	0.675099	-1.37863	-1.84817	0.00435	0.0315234	yes	GO:0005634; GO:0006355; GO:0006351; GO:0003676; GO:0003677; GO:0046872; GO:0007275	nucleic acid binding; regulation of transcription, DNA-templated; DNA binding; nucleus; metal ion binding; transcription, DNA-templated; multicellular organism development	protein_coding
WBGene00002182	kap-1	III:7339000-7343626	N2	rnp-6	OK	2.11555	0.908119	-1.22008	-2.64938	5e-05	0.000725861	yes	GO:0030993; GO:0035869; GO:0019894; GO:0005488; GO:0007018; GO:0097730; GO:1902857; GO:0005515; GO:0035720; GO:0005871; GO:0003777; GO:1902856	non-motile cilium; kinesin complex; microtubule-based movement; ciliary transition zone; protein binding; kinesin binding; binding; negative regulation of non-motile cilium assembly; positive regulation of non-motile cilium assembly; microtubule motor activity; axonemal heterotrimeric kinesin-II complex; intraciliary anterograde transport	protein_coding
WBGene00206459	Y80D4G.1	III:7601469-7604324	N2	rnp-6	OK	11.3333	17.7113	0.644095	1.98419	0.0006	0.00643061	yes
WBGene00020200	T04A6.1	III:7616527-7617594	N2	rnp-6	OK	28.0396	9.02002	-1.63626	-4.38531	5e-05	0.000725861	yes	; GO:0016021; GO:0016020	; integral component of membrane; membrane	protein_coding
WBGene00022798	fahd-1	III:7892350-7894625	N2	rnp-6	OK	54.2425	37.6816	-0.525565	-1.91309	0.00105	0.0101691	yes	GO:0016787; GO:0046872; GO:0008152; GO:0003824	metabolic process; hydrolase activity; metal ion binding; catalytic activity	protein_coding
WBGene00001059	dpf-6	III:8038240-8041374	N2	rnp-6	OK	3.17311	5.50996	0.796143	2.351	5e-05	0.000725861	yes	; GO:0016787; GO:0004177; GO:0016021; GO:0016020; GO:0005886; GO:0006508; GO:0008233; GO:0008236	; serine-type peptidase activity; hydrolase activity; aminopeptidase activity; peptidase activity; membrane; proteolysis; integral component of membrane; plasma membrane	protein_coding
WBGene00019456	K06H7.2	III:8093584-8096307	N2	rnp-6	OK	6.72009	4.19162	-0.680972	-1.83677	0.0015	0.0135324	yes	GO:0005515	protein binding	protein_coding
WBGene00017041	D2007.1	III:8155457-8155942	N2	rnp-6	OK	55.4789	15.1489	-1.87273	-4.64397	5e-05	0.000725861	yes	GO:0045087	innate immune response	protein_coding
WBGene00017320	F09G8.5	III:8254974-8257619	N2	rnp-6	OK	0.732309	2.18541	1.57738	2.84011	5e-05	0.000725861	yes	GO:0005515	protein binding	protein_coding
WBGene00007056	crn-7	III:8268614-8270735	N2	rnp-6	OK	6.91722	3.93696	-0.813109	-2.15353	0.00025	0.00303907	yes	GO:0006259; GO:0016787; GO:0004531; GO:0006309; GO:0005622	hydrolase activity; intracellular; DNA metabolic process; apoptotic DNA fragmentation; deoxyribonuclease II activity	protein_coding
WBGene00000414	cec-1	III:8426339-8428582	N2	rnp-6	OK	30.2062	21.6903	-0.477792	-1.72742	0.00295	0.0231897	yes	GO:0005634; GO:0005694; GO:0003677	DNA binding; nucleus; chromosome	protein_coding
WBGene00015336	C02D5.2	III:8557334-8559194	N2	rnp-6	OK	4.5557	2.75387	-0.726215	-1.6115	0.00495	0.0348181	yes	; GO:0016021; GO:0016020	; integral component of membrane; membrane	protein_coding
WBGene00015518	C06E1.1	III:8605831-8606504	N2	rnp-6	OK	37.5883	22.8209	-0.719929	-2.20091	0.0001	0.00135972	yes	GO:0005515	protein binding	protein_coding
WBGene00006975	zfp-1	III:8792846-8807346	N2	rnp-6	OK	20.9748	29.7625	0.504836	1.7498	0.0016	0.014229	yes	GO:0046872; GO:0035064; GO:0005634; GO:0000793; GO:0000785; GO:0008270; GO:0005515; GO:0003677; GO:0016246; GO:0003682	chromatin; RNA interference; chromatin binding; methylated histone binding; protein binding; DNA binding; zinc ion binding; nucleus; metal ion binding; condensed chromosome	protein_coding
WBGene00014027	tpk-1	III:8912143-8913437	N2	rnp-6	OK	11.7617	7.55527	-0.638545	-1.65398	0.00515	0.0358984	yes	GO:0009229; GO:0030975; GO:0016310; GO:0016301; GO:0000166; GO:0016740; GO:0004788; GO:0006772; GO:0005524	thiamine diphosphokinase activity; transferase activity; phosphorylation; thiamine metabolic process; kinase activity; thiamine diphosphate biosynthetic process; thiamine binding; ATP binding; nucleotide binding	protein_coding
WBGene00000425	ced-11	III:9119464-9125150	N2	rnp-6	OK	4.78436	3.40506	-0.490647	-1.60826	0.00535	0.0369777	yes	GO:0016021; GO:0016020; GO:0006915	apoptotic process; integral component of membrane; membrane	protein_coding
WBGene00011365	T02C1.1	III:9247643-9248617	N2	rnp-6	OK	9.39361	4.70203	-0.998396	-2.10903	0.00055	0.00597832	yes	GO:0031624; GO:0032436; GO:0005622; GO:0008270; GO:0005515; GO:0046872; GO:0061630; GO:0000209	positive regulation of proteasomal ubiquitin-dependent protein catabolic process; ubiquitin protein ligase activity; protein binding; intracellular; zinc ion binding; metal ion binding; ubiquitin conjugating enzyme binding; protein polyubiquitination	protein_coding
WBGene00003067	lrg-1	III:9504763-9507081	N2	rnp-6	OK	7.82768	11.2172	0.519052	1.69462	0.0035	0.0265526	yes
WBGene00006910	vha-1	III:9781242-9782057	N2	rnp-6	OK	258.519	161.284	-0.680664	-3.02914	5e-05	0.000725861	yes	GO:0033177; GO:0006810; GO:0030728; GO:0015991; GO:0005773; GO:0016021; GO:0016020; GO:0015078; GO:0033179; GO:0000220; GO:0009792; GO:0007042; GO:0046961; GO:0060142; GO:0015992; GO:0005774; GO:0006811; GO:0045121	vacuolar membrane; vacuole; vacuolar proton-transporting V-type ATPase, V0 domain; embryo development ending in birth or egg hatching; ovulation; proton-transporting V-type ATPase, V0 domain; membrane raft; proton transport; ion transport; regulation of syncytium formation by plasma membrane fusion; lysosomal lumen acidification; proton-transporting ATPase activity, rotational mechanism; membrane…	protein_coding
WBGene00010865	M04D8.7	III:10037447-10038247	N2	rnp-6	OK	2.8887	1.00745	-1.51971	-2.09543	0.00125	0.0117015	yes	GO:0016021; GO:0016020	integral component of membrane; membrane	protein_coding
WBGene00011812	T16H12.2	III:10086302-10087060	N2	rnp-6	OK	3.8268	1.50489	-1.34649	-2.1237	0.00135	0.0124346	yes			protein_coding
WBGene00011869	dod-6	III:10197715-10198352	N2	rnp-6	OK	9.05258	17.7488	0.971318	2.50403	5e-05	0.000725861	yes			protein_coding
WBGene00011870	T20G5.8	III:10199336-10199861	N2	rnp-6	OK	17.284	30.6569	0.826777	2.3081	0.00015	0.00195025	yes			protein_coding
WBGene00010757	pad-2	III:10279128-10281476	N2	rnp-6	OK	8.2762	5.54156	-0.578676	-1.63065	0.0045	0.0323767	yes	; GO:0005794; GO:0036066; GO:0005975; GO:0005783; GO:0006486; GO:0005575; GO:0016740; GO:0003674; GO:0016757; GO:0006004; GO:0046922	transferase activity, transferring glycosyl groups; ; protein glycosylation; Golgi apparatus; fucose metabolic process; transferase activity; carbohydrate metabolic process; cellular_component; endoplasmic reticulum; protein O-linked fucosylation; peptide-O-fucosyltransferase activity; molecular_function	protein_coding
WBGene00010756	K10G9.2	III:10285922-10288611	N2	rnp-6	OK	4.24733	1.94614	-1.12594	-2.44732	5e-05	0.000725861	yes			protein_coding
WBGene00008019	C38H2.2	III:10381772-10385256	N2	rnp-6	OK	30.1431	20.2265	-0.575583	-2.18745	5e-05	0.000725861	yes	GO:0016267; GO:0016266; GO:0016263; GO:0006486; GO:0016021; GO:0016020; GO:0016740; GO:0016757; GO:0046872	transferase activity, transferring glycosyl groups; O-glycan processing, core 1; protein glycosylation; transferase activity; glycoprotein-N-acetylgalactosamine 3-beta-galactosyltransferase activity; metal ion binding; membrane; integral component of membrane; O-glycan processing	protein_coding
WBGene00008426	D2045.9	III:10475969-10479753	N2	rnp-6	OK	8.91772	5.28544	-0.754652	-2.31547	0.0001	0.00135972	yes			protein_coding
WBGene00006784	unc-49	III:10520675-10532702	N2	rnp-6	OK	4.7159	7.38588	0.647239	1.53463	0.0056	0.0382788	yes	GO:0031594; GO:0006821; GO:0045202; GO:0006811; GO:0030054; GO:0016021; GO:0016020; GO:0007214; GO:0004890; GO:0005254; GO:0005216; GO:0007626; GO:1902476; GO:0005230; GO:0006810; GO:0045211; GO:0005886; GO:0043058; GO:0034220; GO:0098794; GO:0005515; GO:0007165	regulation of backward locomotion; ion channel activity; cell junction; transport; neuromuscular junction; protein binding; GABA-A receptor activity; chloride channel activity; gamma-aminobutyric acid signaling pathway; ion transport; plasma membrane; membrane; chloride transmembrane transport; postsynaptic membrane; synapse; ion transmembrane transport; postsynapse; chloride transport; locomotor…	protein_coding
WBGene00012662	Y39A1C.1	III:10856826-10858174	N2	rnp-6	OK	6.47303	3.14745	-1.04026	-1.77901	0.0043	0.0312605	yes	GO:0005737; GO:0016021; GO:0016020; GO:0055120	cytoplasm; striated muscle dense body; integral component of membrane; membrane	protein_coding
WBGene00000853	cut-6	III:10911459-10916665	N2	rnp-6	OK	1.35171	0.472727	-1.5157	-2.57357	5e-05	0.000725861	yes	GO:0060111; GO:0016021; GO:0016020	alae of collagen and cuticulin-based cuticle extracellular matrix; integral component of membrane; membrane	protein_coding
WBGene00012966	exos-1	III:11009042-11010595	N2	rnp-6	OK	52.6237	36.3745	-0.532785	-1.91771	0.0012	0.0113201	yes	GO:0005737; GO:0090305; GO:0005634; GO:0000176; GO:0004527	cytoplasm; nuclear exosome (RNase complex); nucleus; exonuclease activity; nucleic acid phosphodiester bond hydrolysis	protein_coding
WBGene00012938	Y47D3A.32	III:11252415-11256642	N2	rnp-6	OK	12.0664	5.37884	-1.16563	-2.12184	0.00015	0.00195025	yes	GO:0016021; GO:0016020	integral component of membrane; membrane	protein_coding
WBGene00013429	Y66D12A.3	III:11589879-11592837	N2	rnp-6	OK	0.869608	0.307929	-1.49777	-1.85818	0.0056	0.0382788	yes			protein_coding
WBGene00012750	faah-6	III:11650470-11656185	N2	rnp-6	OK	2.40609	1.45368	-0.726981	-1.61084	0.00565	0.0385456	yes	GO:0016787; GO:0016884; GO:0004040	hydrolase activity; amidase activity; carbon-nitrogen ligase activity, with glutamine as amido-N-donor	protein_coding
WBGene00000670	col-95	III:11703978-11705085	N2	rnp-6	OK	194.499	260.624	0.422207	1.9387	0.0009	0.00897191	yes	GO:0016021; GO:0016020; GO:0005581; GO:0042302	structural constituent of cuticle; collagen trimer; integral component of membrane; membrane	protein_coding
WBGene00012757	Y41C4A.11	III:11719899-11723602	N2	rnp-6	OK	1.57854	10.8254	2.77776	6.42723	5e-05	0.000725861	yes	GO:0006891; GO:0006890; GO:0006888; GO:0030968; GO:0016021; GO:0016020; GO:0030126; GO:0006886	ER to Golgi vesicle-mediated transport; COPI vesicle coat; retrograde vesicle-mediated transport, Golgi to ER; endoplasmic reticulum unfolded protein response; intra-Golgi vesicle-mediated transport; membrane; intracellular protein transport; integral component of membrane	protein_coding
WBGene00003234	mif-1	III:11847901-11850034	N2	rnp-6	OK	11.571	7.6595	-0.595186	-1.70517	0.00385	0.0286865	yes			protein_coding
WBGene00013233	sdz-33	III:11907528-11908474	N2	rnp-6	OK	12.0379	7.84806	-0.617173	-1.70016	0.00345	0.0262347	yes			protein_coding
WBGene00013234	fbxb-24	III:11908967-11909960	N2	rnp-6	OK	9.17478	5.84998	-0.649242	-1.69844	0.0051	0.0356206	yes	GO:0005515	protein binding	protein_coding
WBGene00013541	Y75B8A.4	III:12107773-12113471	N2	rnp-6	OK	22.7918	12.0314	-0.921705	-3.4822	5e-05	0.000725861	yes	GO:0004176; GO:0016787; GO:0005782; GO:0004252; GO:0006625; GO:0005777; GO:0000166; GO:0030163; GO:0006515; GO:0016485; GO:0006508; GO:0008233; GO:0005524; GO:0008236	serine-type endopeptidase activity; protein quality control for misfolded or incompletely synthesized proteins; ATP-dependent peptidase activity; serine-type peptidase activity; hydrolase activity; protein catabolic process; protein processing; peptidase activity; protein targeting to peroxisome; peroxisomal matrix; ATP binding; peroxisome; proteolysis; nucleotide binding	protein_coding
WBGene00004172	pqn-92	III:12307780-12311911	N2	rnp-6	OK	16.078	21.9595	0.44976	1.59255	0.00575	0.0390509	yes			protein_coding
WBGene00023483	Y75B8A.39	III:12313286-12314403	N2	rnp-6	OK	0.231446	1.15985	2.32519	2.01989	0.00585	0.0395707	yes			protein_coding
WBGene00013561	Y75B8A.31	III:12351639-12354922	N2	rnp-6	OK	38.5284	57.2547	0.571471	2.20275	0.00025	0.00303907	yes			protein_coding
WBGene00013036	fbxa-218	III:12436551-12441104	N2	rnp-6	OK	0.888136	2.68873	1.59807	3.2801	5e-05	0.000725861	yes			protein_coding
WBGene00007027	ssl-1	III:12714565-12743929	N2	rnp-6	OK	42.8782	56.0289	0.385926	1.73507	0.0023	0.0191136	yes	; GO:0016787; GO:0005634; GO:0000166; GO:0003677; GO:0004386; GO:0007275; GO:0005524; GO:0016569	; hydrolase activity; DNA binding; covalent chromatin modification; nucleus; ATP binding; multicellular organism development; nucleotide binding; helicase activity	protein_coding
WBGene00220229	ssl-1	III:12714565-12743929	N2	rnp-6	OK	42.8782	56.0289	0.385926	1.73507	0.0023	0.0191136	yes
WBGene00220230	ssl-1	III:12714565-12743929	N2	rnp-6	OK	42.8782	56.0289	0.385926	1.73507	0.0023	0.0191136	yes
WBGene00000673	col-98	III:13018934-13020231	N2	rnp-6	OK	37.9198	62.1282	0.712296	2.7051	5e-05	0.000725861	yes	GO:0016021; GO:0016020; GO:0005581; GO:0042302	structural constituent of cuticle; collagen trimer; integral component of membrane; membrane	protein_coding
WBGene00012717	Y39E4B.6	III:13070759-13075032	N2	rnp-6	OK	8.03868	3.5711	-1.17059	-2.79503	5e-05	0.000725861	yes	GO:0005737; GO:0017069; GO:0005634; GO:0000122; GO:0004861; GO:0071901	negative regulation of transcription from RNA polymerase II promoter; snRNA binding; cytoplasm; nucleus; negative regulation of protein serine/threonine kinase activity; cyclin-dependent protein serine/threonine kinase inhibitor activity	protein_coding
WBGene00003249	mig-18	III:13403246-13404306	N2	rnp-6	OK	9.36718	4.59645	-1.02709	-2.42663	0.0001	0.00135972	yes			protein_coding
WBGene00011729	set-16	III:13643917-13656785	N2	rnp-6	OK	22.6045	29.9396	0.405443	1.85782	0.001	0.0097769	yes	GO:0018024; GO:0032259; GO:0042800; GO:0005634; GO:0040028; GO:0016740; GO:0008270; GO:0005515; GO:0051568; GO:0008168; GO:0046872; GO:0044666	methylation; histone H3-K4 methylation; transferase activity; zinc ion binding; methyltransferase activity; MLL3/4 complex; nucleus; metal ion binding; protein binding; regulation of vulval development; histone methyltransferase activity (H3-K4 specific); histone-lysine N-methyltransferase activity	protein_coding
WBGene00000179	aqp-11	III:13673277-13674745	N2	rnp-6	OK	44.2812	27.9685	-0.662892	-2.372	5e-05	0.000725861	yes	GO:0016021; GO:0016020	integral component of membrane; membrane	protein_coding
WBGene00021043	pck-1	III:62886-66261	N2	rnp-6	OK	45.5694	86.1734	0.919177	4.04417	5e-05	0.000725861	yes	GO:0005737; GO:0016310; GO:0005829; GO:0016301; GO:0004613; GO:0004611; GO:0055120; GO:0017076; GO:0005525; GO:0006094	phosphoenolpyruvate carboxykinase activity; phosphoenolpyruvate carboxykinase (GTP) activity; cytosol; cytoplasm; gluconeogenesis; striated muscle dense body; phosphorylation; kinase activity; GTP binding; purine nucleotide binding	protein_coding
WBGene00018794	attf-3	III:70441-86384	N2	rnp-6	OK	21.257	29.4785	0.471725	2.03915	0.00045	0.00504819	yes	GO:0003676	nucleic acid binding	protein_coding
WBGene00189954	F40G9.18	III:167330-169556	N2	rnp-6	OK	2.75967	1.37302	-1.00714	-2.05075	0.001	0.0097769	yes	GO:0016021; GO:0016020; GO:0005515	protein binding; integral component of membrane; membrane	protein_coding
WBGene00017937	F30H5.3	III:505236-512175	N2	rnp-6	OK	2.7762	1.36994	-1.019	-2.82003	5e-05	0.000725861	yes	GO:0010951; GO:0004867	serine-type endopeptidase inhibitor activity; negative regulation of endopeptidase activity	protein_coding
WBGene00020455	fbxa-59	III:940878-943458	N2	rnp-6	OK	7.14059	12.6531	0.825371	2.23695	0.0001	0.00135972	yes	GO:0045087; GO:0005515	innate immune response; protein binding	protein_coding
WBGene00021339	Y34F4.4	III:1023282-1024561	N2	rnp-6	OK	2.28923	4.38359	0.937249	1.90543	0.0011	0.0105816	yes	GO:0016021; GO:0016020	integral component of membrane; membrane	protein_coding
WBGene00013837	fbxa-30	III:1274513-1275588	N2	rnp-6	OK	0.581574	1.71003	1.55598	2.26297	0.00055	0.00597832	yes	GO:0045087; GO:0005515	innate immune response; protein binding	protein_coding
WBGene00022329	fbxa-79	III:1305754-1308294	N2	rnp-6	OK	7.23848	11.181	0.627287	1.77274	0.0017	0.0149637	yes	GO:0005515	protein binding	protein_coding
WBGene00022326	fbxa-14	III:1322131-1324633	N2	rnp-6	OK	3.22025	1.8996	-0.761478	-1.73412	0.00375	0.0280629	yes	GO:0005515	protein binding	protein_coding
WBGene00022349	Y82E9BR.17	III:1447528-1455770	N2	rnp-6	OK	27.0906	9.70173	-1.48148	-4.83907	5e-05	0.000725861	yes			protein_coding
WBGene00021261	Y22D7AR.7	III:1683629-1688099	N2	rnp-6	OK	0.158857	0.452245	1.50937	2.01656	0.0023	0.0191136	yes	GO:0006470; GO:0016021; GO:0016020; GO:0004725; GO:0035335	protein tyrosine phosphatase activity; peptidyl-tyrosine dephosphorylation; protein dephosphorylation; integral component of membrane; membrane	protein_coding
WBGene00021263	Y22D7AR.10	III:1701709-1702436	N2	rnp-6	OK	181.155	117.288	-0.627173	-2.08585	0.00035	0.00407043	yes			protein_coding
WBGene00004779	ser-4	III:1723193-1733101	N2	rnp-6	OK	1.58725	0.790935	-1.0049	-1.8699	0.00275	0.0219448	yes	GO:0004930; GO:0030594; GO:0005887; GO:0016021; GO:0016020; GO:0098664; GO:0007165; GO:0004871; GO:0007186; GO:0007210; GO:0004993	neurotransmitter receptor activity; G-protein coupled serotonin receptor signaling pathway; serotonin receptor signaling pathway; integral component of plasma membrane; signal transduction; G-protein coupled serotonin receptor activity; signal transducer activity; G-protein coupled receptor activity; membrane; G-protein coupled receptor signaling pathway; integral component of membrane	protein_coding
WBGene00004249	pvf-1	III:1821149-1824114	N2	rnp-6	OK	12.4376	17.8202	0.518806	1.62294	0.00455	0.0326223	yes	GO:0008284; GO:0045138; GO:0005615; GO:0070851; GO:0031954; GO:0016020; GO:1902842; GO:0008083	extracellular space; growth factor receptor binding; membrane; positive regulation of protein autophosphorylation; positive regulation of cell proliferation; growth factor activity; negative regulation of netrin-activated signaling pathway; nematode male tail tip morphogenesis	protein_coding
WBGene00021435	Y39A3A.4	III:2073008-2076520	N2	rnp-6	OK	0.953509	1.98866	1.06048	1.81892	0.0032	0.0247374	yes	GO:0006470; GO:0004725; GO:0035335	protein tyrosine phosphatase activity; peptidyl-tyrosine dephosphorylation; protein dephosphorylation	protein_coding
WBGene00003941	pbo-1	III:2681444-2686463	N2	rnp-6	OK	71.1173	41.653	-0.771781	-2.79192	5e-05	0.000725861	yes	GO:0005509	calcium ion binding	protein_coding
WBGene00022178	Y71H2AM.13	III:2734077-2739531	N2	rnp-6	OK	26.2302	40.6831	0.633199	2.53481	5e-05	0.000725861	yes	GO:0052689	carboxylic ester hydrolase activity	protein_coding
WBGene00022181	pho-9	III:2757167-2760816	N2	rnp-6	OK	15.3129	36.1031	1.23737	4.35117	5e-05	0.000725861	yes	GO:0016311; GO:0003993	acid phosphatase activity; dephosphorylation	protein_coding
WBGene00019997	R10F2.6	III:2937046-2944044	N2	rnp-6	OK	3.95341	2.4877	-0.668282	-2.00435	0.00065	0.0068644	yes	GO:0006470; GO:0004725; GO:0035335	protein tyrosine phosphatase activity; peptidyl-tyrosine dephosphorylation; protein dephosphorylation	protein_coding
WBGene00000898	daf-2	III:2995762-3028800	N2	rnp-6	OK	29.5599	40.1152	0.440508	2.01961	0.0007	0.00728567	yes	GO:0017046; GO:0042169; GO:0016310; GO:0008286; GO:0018108; GO:0030424; GO:0097730; GO:0010629; GO:0010628; GO:0046777; GO:0007169; GO:0061065; GO:0007275; GO:0005737; GO:0000003; GO:0031410; GO:0016021; GO:0016020; GO:0016740; GO:0000166; GO:1905910; GO:0004714; GO:0004713; GO:0004672; GO:1900075; GO:0046872; GO:0043025; GO:0010468; GO:1902075; GO:0040024; GO:0006468; GO:0010286; GO:0045087; GO:…	non-motile cilium; negative regulation of transcription factor import into nucleus; positive regulation of multicellular organism growth; regulation of lipid storage; dauer entry; cytoplasm; carbohydrate metabolic process; axon; protein tyrosine kinase activity; regulation of development, heterochronic; nucleotide binding; regulation of response to reactive oxygen species; protein kinase activity…	protein_coding
WBGene00021919	cutl-25	III:3042588-3047125	N2	rnp-6	OK	3.21921	1.76946	-0.8634	-1.87177	0.0016	0.014229	yes	GO:0016021; GO:0016020	integral component of membrane; membrane	protein_coding
WBGene00011214	R10E9.2	III:3962727-3964098	N2	rnp-6	OK	0.440353	1.094	1.31287	1.65704	0.0076	0.0482968	yes			protein_coding
WBGene00007791	C28A5.6	III:4423713-4429499	N2	rnp-6	OK	1.09155	0.661466	-0.722645	-1.5873	0.0075	0.0478343	yes	GO:0005737; GO:0006468; GO:0018105; GO:0005634; GO:0004674; GO:0008360; GO:0004672; GO:0005524	protein phosphorylation; cytoplasm; regulation of cell shape; peptidyl-serine phosphorylation; protein kinase activity; nucleus; ATP binding; protein serine/threonine kinase activity	protein_coding
WBGene00003577	ndg-4	III:4462829-4467377	N2	rnp-6	OK	14.899	7.48067	-0.993978	-3.40218	5e-05	0.000725861	yes	GO:0016021; GO:0016020	integral component of membrane; membrane	protein_coding
WBGene00010904	ugt-62	III:4537276-4540637	N2	rnp-6	OK	99.5445	76.7114	-0.375902	-1.69163	0.0037	0.027775	yes	GO:0008152; GO:0016021; GO:0016020; GO:0016740; GO:0016757; GO:0016758; GO:0015020; GO:0043231	transferase activity, transferring glycosyl groups; transferase activity; membrane; transferase activity, transferring hexosyl groups; metabolic process; glucuronosyltransferase activity; intracellular membrane-bounded organelle; integral component of membrane	protein_coding
WBGene00007173	B0393.8	III:4751877-4752370	N2	rnp-6	OK	120.903	89.518	-0.4336	-1.53142	0.00775	0.0489842	yes	GO:0016021; GO:0016020	integral component of membrane; membrane	protein_coding
WBGene00016447	msd-4	III:4868333-4868769	N2	rnp-6	OK	1.40338	5.11506	1.86584	2.59588	0.00015	0.00195025	yes	GO:0031143; GO:0044297	cell body; pseudopodium	protein_coding
WBGene00016450	clec-5	III:4881913-4883578	N2	rnp-6	OK	3.12485	7.19771	1.20375	3.16594	5e-05	0.000725861	yes	GO:0030246	carbohydrate binding	protein_coding
WBGene00017827	F26F4.5	III:4887906-4891252	N2	rnp-6	OK	26.0978	33.9245	0.378396	1.50543	0.0077	0.0487669	yes	; GO:0005515	; protein binding	protein_coding
WBGene00016145	C26E6.12	III:4930599-4932189	N2	rnp-6	OK	37.2547	27.4054	-0.442962	-1.67306	0.0033	0.025334	yes	GO:0000287; GO:0003924; GO:0005525	magnesium ion binding; GTPase activity; GTP binding	protein_coding
WBGene00001042	dnj-24	III:5416134-5419565	N2	rnp-6	OK	11.8875	7.62286	-0.641046	-1.67374	0.00545	0.0375212	yes	GO:0005634	nucleus	protein_coding
WBGene00044410	F48E8.8	III:5448800-5449868	N2	rnp-6	OK	3.19806	1.01176	-1.66033	-2.49209	0.0001	0.00135972	yes			protein_coding
WBGene00017031	D1044.6	III:5535657-5543168	N2	rnp-6	OK	35.7827	46.8574	0.389014	1.7525	0.00265	0.0213265	yes			protein_coding
WBGene00018966	F56D2.5	III:5578422-5581220	N2	rnp-6	OK	2.27762	3.62325	0.669756	1.66898	0.0032	0.0247374	yes	GO:0005737; GO:0031624; GO:0032436; GO:0061630; GO:0045087; GO:0000151; GO:0016567; GO:0016740; GO:0042787; GO:0008270; GO:0005515; GO:0046872; GO:0004842; GO:0000209	innate immune response; positive regulation of proteasomal ubiquitin-dependent protein catabolic process; ubiquitin protein ligase activity; transferase activity; zinc ion binding; ubiquitin conjugating enzyme binding; ubiquitin-protein transferase activity; metal ion binding; protein ubiquitination involved in ubiquitin-dependent protein catabolic process; cytoplasm; protein ubiquitination; prot…	protein_coding
WBGene00003796	npp-10	III:6013494-6019552	N2	rnp-6	OK	108.556	142.587	0.393405	1.7581	0.0022	0.0184426	yes	GO:0005635; GO:0034501; GO:0009792; GO:0005487; GO:0008233; GO:0051028; GO:0007049; GO:0008236; GO:0005737; GO:0034398; GO:0043186; GO:0090435; GO:0005634; GO:0016020; GO:0043657; GO:0051301; GO:0006508; GO:0005694; GO:0006405; GO:0016787; GO:0017056; GO:0008139; GO:0006606; GO:0006810; GO:0031965; GO:1990893; GO:0044614; GO:0000776; GO:0030719; GO:0006997; GO:0031081; GO:0005643; GO:0000973; GO:…	RNA export from nucleus; telomere tethering at nuclear periphery; hydrolase activity; RNA binding; nucleus organization; protein import into nucleus; P granule; P granule organization; proteolysis; chromosome; kinetochore; cell division; mRNA transport; transport; cytoplasm; nuclear pore activity; posttranscriptional tethering of RNA polymerase II gene DNA at nuclear periphery; structural constit…	protein_coding
WBGene00220242	npp-10	III:6013494-6019552	N2	rnp-6	OK	108.556	142.587	0.393405	1.7581	0.0022	0.0184426	yes
WBGene00022695	ZK328.6	III:6028812-6030583	N2	rnp-6	OK	2.17123	3.54647	0.70787	1.65564	0.0049	0.0345471	yes	GO:0003700; GO:0006355; GO:0005634; GO:0005515	regulation of transcription, DNA-templated; nucleus; DNA binding transcription factor activity; protein binding	protein_coding
WBGene00018343	F42A10.7	III:6177914-6178702	N2	rnp-6	OK	66.1516	30.2905	-1.12691	-3.86609	5e-05	0.000725861	yes			protein_coding
WBGene00016013	C23G10.6	III:6192120-6194560	N2	rnp-6	OK	0.765162	1.7214	1.16975	2.23935	0.00025	0.00303907	yes	GO:0008152; GO:0016021; GO:0016020; GO:0016740; GO:0016757; GO:0016758; GO:0015020; GO:0043231	transferase activity, transferring glycosyl groups; transferase activity; membrane; transferase activity, transferring hexosyl groups; metabolic process; glucuronosyltransferase activity; intracellular membrane-bounded organelle; integral component of membrane	protein_coding
WBGene00002891	C56G2.7,let-767	III:6338507-6341925	N2	rnp-6	OK	226.236	295.253	0.38412	1.74567	0.00265	0.0213265	yes	GO:0006633; GO:0006631; GO:0005783; GO:0045179; GO:0045197; GO:0009790; GO:0008210; GO:0030283; GO:0016491; GO:0102340; GO:0102341; GO:0102342; GO:0000003; GO:0032350; GO:0030540; GO:0006629; GO:0008209; GO:0042759; GO:0042303; GO:0055114; GO:0018996; GO:0006694; GO:0050062; GO:0102339	3-oxo-behenoyl-CoA reductase activity; steroid biosynthetic process; lipid metabolic process; fatty acid biosynthetic process; embryo development; regulation of hormone metabolic process; 3-oxo-lignoceroyl-CoA reductase activity; molting cycle; fatty acid metabolic process; endoplasmic reticulum; oxidation-reduction process; testosterone dehydrogenase [NAD(P)] activity; apical cortex; establishme…	protein_coding
WBGene00016981	C56G2.7,let-767	III:6338507-6341925	N2	rnp-6	OK	226.236	295.253	0.38412	1.74567	0.00265	0.0213265	yes	GO:0005737; GO:0070628; GO:0005634; GO:0061133; GO:0006511; GO:0043248; GO:0000502; GO:0010950; GO:0008541; GO:0043130	proteasome binding; cytoplasm; positive regulation of endopeptidase activity; proteasome complex; nucleus; endopeptidase activator activity; ubiquitin binding; proteasome assembly; ubiquitin-dependent protein catabolic process; proteasome regulatory particle, lid subcomplex	protein_coding
WBGene00015814	C16A3.10	III:6394233-6396182	N2	rnp-6	OK	118.288	88.9002	-0.412048	-1.83386	0.00105	0.0101691	yes	GO:0004587; GO:0008483; GO:0005739; GO:0003824; GO:0016740; GO:0030170; GO:0005759; GO:0055129; GO:0042802	ornithine-oxo-acid transaminase activity; pyridoxal phosphate binding; transferase activity; mitochondrial matrix; identical protein binding; transaminase activity; catalytic activity; mitochondrion; L-proline biosynthetic process	protein_coding
WBGene00015483	C05D11.5	III:6410035-6411559	N2	rnp-6	OK	25.4693	14.4093	-0.82176	-2.60128	5e-05	0.000725861	yes	GO:0008903; GO:0016853	isomerase activity; hydroxypyruvate isomerase activity	protein_coding
WBGene00003214	mel-32	III:6440144-6443000	N2	rnp-6	OK	250.766	345.281	0.461432	2.14411	5e-05	0.000725861	yes	GO:0004372; GO:0006563; GO:0009790; GO:0006545; GO:0006544; GO:0006730; GO:0035999; GO:0005739; GO:0003824; GO:0016740; GO:0009792; GO:0030170; GO:0009069	pyridoxal phosphate binding; glycine biosynthetic process; embryo development ending in birth or egg hatching; one-carbon metabolic process; transferase activity; embryo development; L-serine metabolic process; glycine metabolic process; serine family amino acid metabolic process; glycine hydroxymethyltransferase activity; catalytic activity; mitochondrion; tetrahydrofolate interconversion	protein_coding
WBGene00015640	C09E7.6	III:6541549-6546425	N2	rnp-6	OK	5.65085	8.57993	0.602499	2.10886	0.0002	0.00250605	yes
WBGene00004133	abu-13	III:6941887-6944738	N2	rnp-6	OK	1.50452	0.569459	-1.40164	-2.18439	0.0008	0.00816818	yes			protein_coding
WBGene00019813	ger-1	III:7065436-7067440	N2	rnp-6	OK	26.2699	13.3653	-0.974914	-3.18082	5e-05	0.000725861	yes	GO:0050662; GO:0016853; GO:0009226; GO:0042350; GO:0042351; GO:0003824; GO:0008152; GO:0050577; GO:0055114; GO:0016491	nucleotide-sugar biosynthetic process; catalytic activity; oxidoreductase activity; coenzyme binding; metabolic process; GDP-L-fucose biosynthetic process; 'de novo' GDP-L-fucose biosynthetic process; isomerase activity; GDP-L-fucose synthase activity; oxidation-reduction process	protein_coding
WBGene00006628	tsp-2	III:8236916-8237893	N2	rnp-6	OK	5.24342	10.1657	0.955128	2.38259	5e-05	0.000725861	yes	GO:0016021; GO:0016020; GO:0005887; GO:0007166	integral component of plasma membrane; integral component of membrane; cell surface receptor signaling pathway; membrane	protein_coding
WBGene00006627	tsp-1	III:8237994-8239423	N2	rnp-6	OK	5.90629	9.92841	0.749311	1.96839	0.001	0.0097769	yes	GO:0005887; GO:0016021; GO:0016020; GO:0045087; GO:0007166	integral component of plasma membrane; innate immune response; integral component of membrane; cell surface receptor signaling pathway; membrane	protein_coding
WBGene00023223	ZK1236.8	III:8436699-8437811	N2	rnp-6	OK	0	0.890124	inf		0.00755	0.0480515	yes
WBGene00018370	F42H10.6	III:8478381-8480455	N2	rnp-6	OK	66.0869	37.3419	-0.823569	-2.84307	5e-05	0.000725861	yes	GO:0005737; GO:0016787; GO:0047617; GO:0042802	hydrolase activity; cytoplasm; acyl-CoA hydrolase activity; identical protein binding	protein_coding
WBGene00019304	K02D10.4	III:8777907-8780012	N2	rnp-6	OK	3.06629	1.79886	-0.769407	-1.75474	0.00375	0.0280629	yes			protein_coding
WBGene00003518	nac-2	III:9038780-9043244	N2	rnp-6	OK	7.42671	5.20217	-0.51361	-1.53323	0.0078	0.0492264	yes	GO:0071422; GO:0006810; GO:0006629; GO:0015293; GO:0005215; GO:0016021; GO:0016020; GO:0055085; GO:0015137; GO:0015746; GO:0005887; GO:0040018; GO:0015141; GO:0008340; GO:0006814; GO:0006811; GO:0015744	transporter activity; positive regulation of multicellular organism growth; symporter activity; integral component of plasma membrane; succinate transmembrane transporter activity; citrate transmembrane transporter activity; integral component of membrane; ion transport; sodium ion transport; determination of adult lifespan; lipid metabolic process; membrane; citrate transport; succinate transmem…	protein_coding
WBGene00001385	far-1	III:9080366-9081179	N2	rnp-6	OK	641.177	868.698	0.438131	2.03658	0.0003	0.00356315	yes	; GO:0005576; GO:0008289	extracellular region; ; lipid binding	protein_coding
WBGene00003597	nhl-1	III:9146046-9153890	N2	rnp-6	OK	2.46395	3.58538	0.541152	1.54746	0.0064	0.0424098	yes	GO:0016567; GO:0046872; GO:0004842; GO:0008270; GO:0005515	protein ubiquitination; protein binding; ubiquitin-protein transferase activity; metal ion binding; zinc ion binding	protein_coding
WBGene00013847	cls-3	III:9186076-9199507	N2	rnp-6	OK	12.2621	19.46	0.666309	2.56513	5e-05	0.000725861	yes	GO:0005856; GO:0005737; GO:0040001; GO:0030953; GO:0005488; GO:0005874	microtubule; cytoplasm; establishment of mitotic spindle localization; astral microtubule organization; binding; cytoskeleton	protein_coding
WBGene00001263	emb-9	III:9336876-9344447	N2	rnp-6	OK	80.2674	107.135	0.416539	1.92651	0.0007	0.00728567	yes	GO:0005201; GO:0005604; GO:0005581; GO:0050714; GO:0002119; GO:0007517; GO:0009792; GO:0030198; GO:0005578; GO:0005576	nematode larval development; embryo development ending in birth or egg hatching; extracellular matrix organization; extracellular region; muscle organ development; positive regulation of protein secretion; basement membrane; extracellular matrix structural constituent; proteinaceous extracellular matrix; collagen trimer	protein_coding
WBGene00010573	K04H4.2	III:9347713-9355480	N2	rnp-6	OK	2.31355	1.24876	-0.889617	-1.9741	0.00105	0.0101691	yes	; GO:0006030; GO:0005576; GO:0008061	extracellular region; ; chitin metabolic process; chitin binding	protein_coding
WBGene00014220	ZK1098.3	III:9532434-9538698	N2	rnp-6	OK	5.39215	2.32219	-1.21537	-3.36422	5e-05	0.000725861	yes	GO:0005737; GO:0016787; GO:0008408; GO:0006139; GO:0004518; GO:0005634; GO:0090305; GO:0003676; GO:0004527	nucleobase-containing compound metabolic process; nucleic acid binding; nuclease activity; hydrolase activity; cytoplasm; nucleic acid phosphodiester bond hydrolysis; nucleus; 3'-5' exonuclease activity; exonuclease activity	protein_coding
WBGene00008168	C48B4.3	III:9580642-9582388	N2	rnp-6	OK	1.88378	0.78851	-1.25643	-1.80389	0.00255	0.0206975	yes			protein_coding
WBGene00008167	acox-5	III:9586612-9592192	N2	rnp-6	OK	106.628	80.4627	-0.406198	-1.83404	0.00145	0.013173	yes	GO:0006631; GO:0050660; GO:0006629; GO:0006635; GO:0033539; GO:0016627; GO:0005777; GO:0033540; GO:0042811; GO:0071949; GO:0008152; GO:0003995; GO:0003997; GO:0055114; GO:0016491	oxidoreductase activity, acting on the CH-CH group of donors; fatty acid beta-oxidation using acyl-CoA dehydrogenase; fatty acid metabolic process; pheromone biosynthetic process; oxidoreductase activity; FAD binding; flavin adenine dinucleotide binding; metabolic process; oxidation-reduction process; lipid metabolic process; peroxisome; fatty acid beta-oxidation; fatty acid beta-oxidation using …	protein_coding
WBGene00001570	gei-13	III:9632187-9637116	N2	rnp-6	OK	5.35638	2.45587	-1.12503	-3.06632	5e-05	0.000725861	yes	GO:0005575; GO:0046872; GO:0005515; GO:0003676; GO:0003677	nucleic acid binding; DNA binding; cellular_component; metal ion binding; protein binding	protein_coding
WBGene00007404	best-5	III:9686932-9690253	N2	rnp-6	OK	1.76063	4.29435	1.28635	3.06767	5e-05	0.000725861	yes	GO:0006810; GO:1902476; GO:0016021; GO:0016020; GO:0034707; GO:0006821; GO:0005886; GO:0005254; GO:0006811	chloride channel complex; chloride transmembrane transport; chloride transport; chloride channel activity; ion transport; plasma membrane; membrane; integral component of membrane; transport	protein_coding
WBGene00011803	T16G12.1	III:10040180-10049781	N2	rnp-6	OK	7.02343	3.31737	-1.08214	-3.84711	5e-05	0.000725861	yes	GO:0005737; GO:0042277; GO:0043171; GO:0046662; GO:0008270; GO:0070006; GO:0006508; GO:1903538; GO:0008237	peptide binding; metalloaminopeptidase activity; regulation of oviposition; cytoplasm; regulation of meiotic cell cycle process involved in oocyte maturation; zinc ion binding; peptide catabolic process; metallopeptidase activity; proteolysis	protein_coding
WBGene00010974	bbs-5	III:10258871-10261658	N2	rnp-6	OK	2.871	1.59396	-0.848937	-1.71774	0.0045	0.0323767	yes	GO:0005856; GO:0005737; GO:0006810; GO:0046907; GO:0060271; GO:0036064; GO:0030030; GO:0016020; GO:0005929; GO:0032266; GO:0005815; GO:0097730; GO:0060170; GO:0097546; GO:0005886; GO:0015031; GO:0042995; GO:0005930; GO:0034464	non-motile cilium; phosphatidylinositol-3-phosphate binding; ciliary base; cytoplasm; ciliary basal body; membrane; ciliary membrane; cilium; axoneme; BBSome; plasma membrane; intracellular transport; protein transport; cell projection organization; cytoskeleton; microtubule organizing center; cell projection; cilium assembly; transport	protein_coding
WBGene00000667	col-92	III:10982165-10983253	N2	rnp-6	OK	1.86191	5.1375	1.46429	2.98932	5e-05	0.000725861	yes	GO:0016021; GO:0016020; GO:0005581; GO:0042302	structural constituent of cuticle; collagen trimer; integral component of membrane; membrane	protein_coding
WBGene00000668	col-93	III:10984554-10985608	N2	rnp-6	OK	41.7632	95.1376	1.18778	4.33883	5e-05	0.000725861	yes	GO:0016021; GO:0016020; GO:0005581; GO:0042302	structural constituent of cuticle; collagen trimer; integral component of membrane; membrane	protein_coding
WBGene00000669	col-94	III:10986825-10987843	N2	rnp-6	OK	1.07336	3.8933	1.85886	3.33059	5e-05	0.000725861	yes	GO:0016021; GO:0016020; GO:0005581; GO:0042302	structural constituent of cuticle; collagen trimer; integral component of membrane; membrane	protein_coding
WBGene00012922	Y47D3A.1	III:11139260-11141825	N2	rnp-6	OK	7.16227	4.76993	-0.586449	-1.66268	0.00425	0.0309824	yes	GO:0036065; GO:0006486; GO:0016020; GO:0008417; GO:0000139; GO:0046920	protein glycosylation; alpha-(1->3)-fucosyltransferase activity; Golgi membrane; membrane; fucosylation; fucosyltransferase activity	protein_coding
WBGene00006604	tra-1	III:11172091-11195207	N2	rnp-6	OK	11.287	18.2881	0.696237	2.30032	5e-05	0.000725861	yes	GO:0005737; GO:0043565; GO:0008022; GO:0005515; GO:0019099; GO:0000122; GO:0019101; GO:0001162; GO:0005634; GO:0030154; GO:0008406; GO:0007548; GO:0000980; GO:0007283; GO:0000977; GO:0003676; GO:0003677; GO:0046872; GO:0007275; GO:0043525	sex differentiation; nucleic acid binding; negative regulation of transcription from RNA polymerase II promoter; spermatogenesis; female somatic sex determination; cytoplasm; DNA binding; cell differentiation; RNA polymerase II distal enhancer sequence-specific DNA binding; protein C-terminus binding; female germ-line sex determination; nucleus; metal ion binding; gonad development; protein bindi…	protein_coding
WBGene00000671	col-96	III:11705712-11706644	N2	rnp-6	OK	6.77962	11.1129	0.712959	1.91105	0.00105	0.0101691	yes	GO:0016021; GO:0016020; GO:0005581; GO:0042302	structural constituent of cuticle; collagen trimer; integral component of membrane; membrane	protein_coding
WBGene00007703	gbf-1	III:11751256-11773683	N2	rnp-6	OK	18.6161	23.6324	0.344217	1.53562	0.00735	0.0471344	yes	GO:0016197; GO:0000137; GO:0046903; GO:0016192; ; GO:0070971; GO:0007029; GO:0005802; GO:0005086; GO:0005488; GO:0032012; GO:0007005; GO:0043547	; Golgi cis cisterna; binding; endosomal transport; vesicle-mediated transport; positive regulation of GTPase activity; regulation of ARF protein signal transduction; endoplasmic reticulum organization; trans-Golgi network; secretion; endoplasmic reticulum exit site; mitochondrion organization; ARF guanyl-nucleotide exchange factor activity	protein_coding
WBGene00013230	fbxb-22	III:11882583-11883539	N2	rnp-6	OK	6.19776	3.33875	-0.892439	-2.07093	0.0005	0.00551085	yes			protein_coding
WBGene00013579	Y79H2A.2	III:12028966-12030754	N2	rnp-6	OK	15.2841	8.76288	-0.802555	-2.03083	0.00065	0.0068644	yes	GO:0016021; GO:0016020	integral component of membrane; membrane	protein_coding
WBGene00013549	Y75B8A.13	III:12203763-12215686	N2	rnp-6	OK	13.0076	18.4045	0.500699	2.08658	0.00025	0.00303907	yes			protein_coding
WBGene00012548	Y37D8A.6	III:12856826-12857913	N2	rnp-6	OK	20.659	35.4065	0.777239	2.33488	5e-05	0.000725861	yes	GO:0016021; GO:0016020	integral component of membrane; membrane	protein_coding
WBGene00000672	col-97	III:12987671-12993704	N2	rnp-6	OK	0.549984	1.24009	1.17298	1.64891	0.00475	0.0337236	yes	GO:0016021; GO:0016020; GO:0005581; GO:0042302	structural constituent of cuticle; collagen trimer; integral component of membrane; membrane	protein_coding
WBGene00011474	aldo-1	III:13563340-13564990	N2	rnp-6	OK	44.3334	75.6377	0.77071	3.19494	5e-05	0.000725861	yes	GO:0005737; GO:0005720; GO:0005783; GO:0030017; GO:0016829; GO:0003824; GO:0055120; GO:0004332; GO:0006096; GO:0042802	lyase activity; cytoplasm; fructose-bisphosphate aldolase activity; striated muscle dense body; endoplasmic reticulum; glycolytic process; identical protein binding; catalytic activity; sarcomere; nuclear heterochromatin	protein_coding
WBGene00018256	cutl-28	IV:684496-688339	N2	rnp-6	OK	1.75856	0.721602	-1.28512	-2.58911	0.0001	0.00135972	yes	GO:0006508; GO:0016021; GO:0016020; GO:0005515; GO:0005576	extracellular region; protein binding; proteolysis; integral component of membrane; membrane	protein_coding
WBGene00021948	kvs-5	IV:736746-753316	N2	rnp-6	OK	2.11837	3.3663	0.668205	1.67017	0.00355	0.0268498	yes	GO:0005267; GO:0006810; GO:0071805; GO:0006813; GO:0051260; GO:0006811; GO:0016020; GO:0005216; GO:0008076; GO:0055085; GO:0005249; GO:0005886; GO:0034765; GO:0005244; GO:0016021	regulation of ion transmembrane transport; voltage-gated potassium channel complex; voltage-gated ion channel activity; voltage-gated potassium channel activity; ion channel activity; transmembrane transport; ion transport; potassium channel activity; potassium ion transmembrane transport; transport; protein homooligomerization; membrane; potassium ion transport; integral component of membrane; p…	protein_coding
WBGene00021938	Y55F3BR.1	IV:874600-881909	N2	rnp-6	OK	8.73593	16.7452	0.938714	3.41745	5e-05	0.000725861	yes	GO:0005737; GO:0005515; GO:0005730; GO:0004004; GO:0003676; GO:0010501; GO:0005524	nucleic acid binding; nucleolus; ATP-dependent RNA helicase activity; cytoplasm; ATP binding; protein binding; RNA secondary structure unwinding	protein_coding
WBGene00021921	Y55F3AM.3	IV:1012651-1019558	N2	rnp-6	OK	41.247	58.5993	0.506594	2.11265	0.0001	0.00135972	yes	GO:0005634; GO:0003723; GO:0003676; GO:0006397	RNA binding; mRNA processing; nucleus; nucleic acid binding	protein_coding
WBGene00003893	ost-1	IV:1107395-1110856	N2	rnp-6	OK	147.208	200.139	0.443151	1.98167	0.00055	0.00597832	yes	GO:0005604; GO:0005615; GO:0050840; GO:0048856; GO:0005578; GO:0005576; GO:0005518; GO:0005509; GO:0005515; GO:0046872; GO:0007275; GO:0007165	calcium ion binding; extracellular space; extracellular matrix binding; extracellular region; protein binding; signal transduction; basement membrane; metal ion binding; anatomical structure development; proteinaceous extracellular matrix; collagen binding; multicellular organism development	protein_coding
WBGene00016796	cec-2	IV:1170705-1177065	N2	rnp-6	OK	9.36409	13.0146	0.474926	1.59134	0.0052	0.0361513	yes			protein_coding
WBGene00021121	W09G12.7	IV:1229079-1230795	N2	rnp-6	OK	1.98103	3.35001	0.757915	1.74002	0.0024	0.0197654	yes	GO:0005509	calcium ion binding	protein_coding
WBGene00019368	K03H6.2	IV:1510563-1515302	N2	rnp-6	OK	7.04162	1.55024	-2.18342	-3.64157	5e-05	0.000725861	yes	; GO:0016787; GO:0006629	hydrolase activity; ; lipid metabolic process	protein_coding
WBGene00019540	K08D12.6	IV:1720789-1723069	N2	rnp-6	OK	2.04688	3.38564	0.726004	1.90319	0.001	0.0097769	yes			protein_coding
WBGene00021505	Y41D4A.3	IV:1752456-1761568	N2	rnp-6	OK	4.73138	2.03713	-1.21572	-2.12769	0.00145	0.013173	yes			protein_coding
WBGene00022297	Y76B12C.3	IV:1973705-1975676	N2	rnp-6	OK	84.4042	58.1547	-0.537417	-1.9657	0.0006	0.00643061	yes			protein_coding
WBGene00022083	Y69A2AR.12	IV:2568613-2572281	N2	rnp-6	OK	1.01963	2.05869	1.01368	2.17144	0.0001	0.00135972	yes	GO:0016021; GO:0016020	integral component of membrane; membrane	protein_coding
WBGene00004878	smf-3	IV:2619874-2625505	N2	rnp-6	OK	27.187	12.027	-1.17664	-4.2636	5e-05	0.000725861	yes	GO:0000041; GO:0006810; GO:0046915; GO:0016324; GO:0031410; GO:0016021; GO:0016020; GO:0005215; GO:0005622; GO:0055071; GO:0030659; GO:0055072; GO:0006979; GO:0010038; GO:0005886; GO:0010042; GO:0006811	cytoplasmic vesicle; apical plasma membrane; response to manganese ion; cytoplasmic vesicle membrane; transporter activity; intracellular; transition metal ion transport; ion transport; transition metal ion transmembrane transporter activity; plasma membrane; membrane; manganese ion homeostasis; response to metal ion; response to oxidative stress; integral component of membrane; transport; iron i…	protein_coding
WBGene00022375	Y94H6A.2	IV:2730251-2732404	N2	rnp-6	OK	0.950323	2.6271	1.46698	2.85974	5e-05	0.000725861	yes			protein_coding
WBGene00044488	Y54G2A.45	IV:2805856-2809030	N2	rnp-6	OK	54.5566	36.5801	-0.576694	-1.9173	0.0016	0.014229	yes	; GO:0016787; GO:0006629	hydrolase activity; ; lipid metabolic process	protein_coding
WBGene00235268	Y54G2A.76	IV:2809445-2812855	N2	rnp-6	OK	2.83606	0.507414	-2.48265	-2.97012	0.00025	0.00303907	yes			protein_coding
WBGene00021872	clec-85	IV:2854345-2855456	N2	rnp-6	OK	116.38	64.2495	-0.857087	-3.53057	5e-05	0.000725861	yes	GO:0045087; GO:0030246	innate immune response; carbohydrate binding	protein_coding
WBGene00020729	T23E1.2	IV:3139832-3146723	N2	rnp-6	OK	2.88631	1.81478	-0.669434	-1.65621	0.00525	0.0364418	yes
WBGene00001692	grd-3	IV:3439654-3440456	N2	rnp-6	OK	73.7997	53.6737	-0.4594	-1.71159	0.00315	0.0244316	yes	GO:0050829; GO:0007267; GO:0005102; GO:0005576	extracellular region; cell-cell signaling; defense response to Gram-negative bacterium; receptor binding	protein_coding
WBGene00019047	F58E2.3	IV:3467429-3469828	N2	rnp-6	OK	0.561274	0.22188	-1.33892	-1.91359	0.00295	0.0231897	yes	GO:0005515	protein binding	protein_coding
WBGene00219307	F56D6.17	IV:3895962-3897997	N2	rnp-6	OK	8.32475	4.20047	-0.986858	-1.89244	0.0018	0.0156835	yes
WBGene00018971	clec-67	IV:3922164-3925045	N2	rnp-6	OK	7.88917	3.12674	-1.33522	-3.78959	5e-05	0.000725861	yes	GO:0045087; GO:0030246	innate immune response; carbohydrate binding	protein_coding
WBGene00021581	clec-70	IV:3932732-3936238	N2	rnp-6	OK	5.16475	0.928201	-2.47619	-4.98834	5e-05	0.000725861	yes	GO:0045087; GO:0050830; GO:0030246	innate immune response; defense response to Gram-positive bacterium; carbohydrate binding	protein_coding
WBGene00021583	clec-72	IV:3944815-3947364	N2	rnp-6	OK	0.944614	1.78727	0.919961	1.72985	0.00275	0.0219448	yes	GO:0045087; GO:0030246	innate immune response; carbohydrate binding	protein_coding
WBGene00018643	drd-50	IV:4117787-4119179	N2	rnp-6	OK	19.2448	2.06796	-3.21819	-7.32093	5e-05	0.000725861	yes	GO:0045087; GO:0050830	innate immune response; defense response to Gram-positive bacterium	protein_coding
WBGene00019932	R07C12.2	IV:4148140-4150055	N2	rnp-6	OK	6.27976	9.44619	0.589022	1.65351	0.0044	0.0318201	yes
WBGene00019931	R07C12.1	IV:4152546-4154029	N2	rnp-6	OK	0.235368	0.906881	1.94599	2.22051	0.00175	0.015327	yes	GO:0045087	innate immune response	protein_coding
WBGene00219216	K08D10.14	IV:4155272-4157132	N2	rnp-6	OK	1.39266	3.08202	1.14604	2.07875	0.0005	0.00551085	yes	GO:0045087	innate immune response	protein_coding
WBGene00017934	F30B5.4	IV:4205974-4218248	N2	rnp-6	OK	33.9266	20.0055	-0.762019	-2.90717	5e-05	0.000725861	yes	GO:0005575; GO:0003674; GO:0055114; GO:0016491	molecular_function; cellular_component; oxidation-reduction process; oxidoreductase activity	protein_coding
WBGene00001074	dpy-13	IV:4235613-4236706	N2	rnp-6	OK	0.0906597	1.52436	4.0716	2.98866	0.00695	0.0452297	yes	GO:0060102; GO:0005581; GO:0042338; GO:0042302	cuticle development involved in collagen and cuticulin-based cuticle molting cycle; structural constituent of cuticle; collagen and cuticulin-based cuticle extracellular matrix; collagen trimer	protein_coding
WBGene00235372	F15E6.12	IV:4306274-4306578	N2	rnp-6	OK	1.27131	0	-inf		0.00085	0.00858204	yes
WBGene00017482	set-9	IV:4307895-4317260	N2	rnp-6	OK	6.32771	10.0443	0.66662	2.59292	5e-05	0.000725861	yes	GO:0018024; GO:0032259; GO:0005634; GO:0003682; GO:0034968; GO:0016740; GO:0008270; GO:0005515; GO:0008340; GO:0007076; GO:0008168; GO:0046872	chromatin binding; methylation; transferase activity; mitotic chromosome condensation; zinc ion binding; histone lysine methylation; methyltransferase activity; nucleus; metal ion binding; protein binding; histone-lysine N-methyltransferase activity; determination of adult lifespan	protein_coding
WBGene00020976	oac-51	IV:4336793-4341304	N2	rnp-6	OK	2.17722	0.431268	-2.33583	-3.83815	5e-05	0.000725861	yes	GO:0016021; GO:0016020; GO:0033692; GO:0016740; GO:0016746; GO:0016747	cellular polysaccharide biosynthetic process; transferase activity; transferase activity, transferring acyl groups; membrane; transferase activity, transferring acyl groups other than amino-acyl groups; integral component of membrane	protein_coding
WBGene00018898	F55F10.1	IV:4360834-4386540	N2	rnp-6	OK	24.1754	30.583	0.339187	1.57402	0.00545	0.0375212	yes	; GO:0005634; GO:0030687; GO:0006364; GO:0016887; GO:0005524; GO:0000027	; rRNA processing; preribosome, large subunit precursor; nucleus; ATP binding; ribosomal large subunit assembly; ATPase activity	protein_coding
WBGene00020677	T22B11.3	IV:4682952-4685109	N2	rnp-6	OK	0.787584	1.66441	1.0795	1.83238	0.00275	0.0219448	yes
WBGene00017116	fbxb-78	IV:4737557-4738734	N2	rnp-6	OK	3.14617	1.49308	-1.07531	-2.11871	0.0008	0.00816818	yes			protein_coding
WBGene00021201	Y17G9B.4	IV:4752093-4753230	N2	rnp-6	OK	16.4431	10.5408	-0.641491	-1.87665	0.0013	0.0120757	yes	GO:0000413; GO:0006457; GO:0016853; GO:0003755	protein peptidyl-prolyl isomerization; isomerase activity; protein folding; peptidyl-prolyl cis-trans isomerase activity	protein_coding
WBGene00021178	Y9C9A.8	IV:4930364-4932217	N2	rnp-6	OK	2.60313	1.34546	-0.95215	-1.93265	0.0013	0.0120757	yes	GO:0005515	protein binding	protein_coding
WBGene00006053	ssq-4	IV:5016480-5017762	N2	rnp-6	OK	0.502729	1.34158	1.41608	2.08644	0.00085	0.00858204	yes			protein_coding
WBGene00003450	msp-57	IV:5062542-5062997	N2	rnp-6	OK	1.15756	3.21996	1.47596	1.88143	0.0041	0.0300971	yes	GO:0005856; GO:0005737; GO:0042995; GO:0031143	cytoplasm; cytoskeleton; cell projection; pseudopodium	protein_coding
WBGene00003426	msp-19	IV:5260553-5261010	N2	rnp-6	OK	0.616128	2.09849	1.76805	1.79585	0.00695	0.0452297	yes	GO:0005856; GO:0005737; GO:0042995; GO:0031143	cytoplasm; cytoskeleton; cell projection; pseudopodium	protein_coding
WBGene00016541	C39H7.1	IV:5631738-5633370	N2	rnp-6	OK	0.2299	0.793456	1.78714	1.77639	0.00325	0.0250162	yes	GO:0005737; GO:0006468; GO:0018105; GO:0005634; GO:0000166; GO:0004674; GO:0008360; GO:0004672; GO:0005524	protein phosphorylation; cytoplasm; regulation of cell shape; peptidyl-serine phosphorylation; protein kinase activity; nucleus; ATP binding; protein serine/threonine kinase activity; nucleotide binding	protein_coding
WBGene00016953	C55C3.3	IV:5685292-5688304	N2	rnp-6	OK	3.44589	8.12941	1.23827	3.4384	5e-05	0.000725861	yes	GO:0016021; GO:0016020	integral component of membrane; membrane	protein_coding
WBGene00019154	glf-1	IV:5885834-5889805	N2	rnp-6	OK	7.77409	1.76108	-2.14221	-5.19456	5e-05	0.000725861	yes	GO:0005737; GO:0008767; GO:0016853; GO:0033692; GO:0055114; GO:0016491	cellular polysaccharide biosynthetic process; UDP-galactopyranose mutase activity; cytoplasm; oxidoreductase activity; isomerase activity; oxidation-reduction process	protein_coding
WBGene00016760	C49A9.6	IV:6210999-6213186	N2	rnp-6	OK	7.62725	4.73279	-0.688471	-1.9023	0.001	0.0097769	yes			protein_coding
WBGene00000256	bli-6	IV:6377093-6378195	N2	rnp-6	OK	0.264687	1.31063	2.3079	2.73927	0.0004	0.00457121	yes	GO:0016021; GO:0016020; GO:0042302	structural constituent of cuticle; integral component of membrane; membrane	protein_coding
WBGene00001858	hil-7	IV:6646033-6646939	N2	rnp-6	OK	43.3743	28.868	-0.587368	-1.65712	0.00345	0.0262347	yes	; GO:0006334; GO:0000786; GO:0003677	; nucleosome; DNA binding; nucleosome assembly	protein_coding
WBGene00015933	C17H12.8	IV:6818605-6820643	N2	rnp-6	OK	64.1856	39.8372	-0.688133	-2.62083	5e-05	0.000725861	yes	GO:0050829; GO:0045087; GO:0045121	innate immune response; membrane raft; defense response to Gram-negative bacterium	protein_coding
WBGene00167648	C17H12.8	IV:6818605-6820643	N2	rnp-6	OK	64.1856	39.8372	-0.688133	-2.62083	5e-05	0.000725861	yes
WBGene00019215	H20E11.3	IV:6824893-6826761	N2	rnp-6	OK	8.05266	3.5452	-1.1836	-2.97458	5e-05	0.000725861	yes	GO:0050829; GO:0045087; GO:0045121	innate immune response; membrane raft; defense response to Gram-negative bacterium	protein_coding
WBGene00003043	lip-1	IV:6842956-6845901	N2	rnp-6	OK	19.0375	26.15	0.457968	1.73631	0.00255	0.0206975	yes	GO:0048599; GO:0007219; GO:0016791; GO:0008138; GO:0016311; GO:0006470; GO:0040028; GO:0017017; GO:0000188; GO:0007281; GO:0009792; GO:0042659; GO:0046580; GO:0005515; GO:0005886; GO:0051447; GO:0043407	germ cell development; embryo development ending in birth or egg hatching; phosphatase activity; negative regulation of meiotic cell cycle; protein tyrosine/serine/threonine phosphatase activity; protein binding; inactivation of MAPK activity; regulation of cell fate specification; MAP kinase tyrosine/serine/threonine phosphatase activity; negative regulation of Ras protein signal transduction; r…	protein_coding
WBGene00016084	cht-3	IV:7003624-7009269	N2	rnp-6	OK	116.633	72.2859	-0.690195	-3.18002	5e-05	0.000725861	yes	GO:0005737; GO:0016787; GO:0005975; GO:0016798; GO:0000272; GO:0005576; GO:0008061; GO:0008152; GO:0004553; GO:0004568; GO:0006032	hydrolase activity, acting on glycosyl bonds; hydrolase activity, hydrolyzing O-glycosyl compounds; extracellular region; cytoplasm; carbohydrate metabolic process; metabolic process; hydrolase activity; polysaccharide catabolic process; chitinase activity; chitin binding; chitin catabolic process	protein_coding
WBGene00015552	C06G3.6	IV:7017625-7020202	N2	rnp-6	OK	23.8168	17.2465	-0.465675	-1.74763	0.0024	0.0197654	yes	GO:0005776; GO:0016235; GO:0043130; GO:0008270; GO:0005515; GO:0006511; GO:0046872; GO:0042802	aggresome; protein binding; identical protein binding; zinc ion binding; metal ion binding; ubiquitin binding; ubiquitin-dependent protein catabolic process; autophagosome	protein_coding
WBGene00206380	C42D4.18	IV:7166848-7167668	N2	rnp-6	OK	6.10005	3.03299	-1.00808	-1.96698	0.00145	0.013173	yes			protein_coding
WBGene00004822	skr-16	IV:7168709-7169346	N2	rnp-6	OK	32.2242	22.0322	-0.548526	-1.69737	0.00265	0.0213265	yes	GO:0006511; GO:0016874	ubiquitin-dependent protein catabolic process; ligase activity	protein_coding
WBGene00016594	C42D4.1	IV:7189190-7190331	N2	rnp-6	OK	292.526	409.84	0.486498	2.25556	0.00015	0.00195025	yes			protein_coding
WBGene00015532	C06E4.3	IV:7260884-7262028	N2	rnp-6	OK	1.90271	3.71162	0.963995	1.92747	0.0011	0.0105816	yes			protein_coding
WBGene00017991	clec-180	IV:7568901-7573778	N2	rnp-6	OK	1.58816	0.483928	-1.71449	-2.74872	5e-05	0.000725861	yes	; GO:0030246; GO:0005575; GO:0004888; GO:0005576; GO:0003674; GO:0007165; GO:0005887; GO:0008150	; carbohydrate binding; molecular_function; transmembrane signaling receptor activity; extracellular region; signal transduction; cellular_component; integral component of plasma membrane; biological_process	protein_coding
WBGene00000190	arf-1.1	IV:7634831-7641858	N2	rnp-6	OK	1.55155	6.87127	2.14686	2.82648	5e-05	0.000725861	yes	GO:0005794; GO:0007264; GO:0016192; GO:0030968; GO:0006810; GO:0000166; GO:0015031; GO:0005622; GO:0005525	endoplasmic reticulum unfolded protein response; intracellular; Golgi apparatus; small GTPase mediated signal transduction; GTP binding; vesicle-mediated transport; protein transport; nucleotide binding; transport	protein_coding
WBGene00016845	C50F7.5	IV:7726717-7727951	N2	rnp-6	OK	345.491	240.801	-0.520807	-2.38428	5e-05	0.000725861	yes			protein_coding
WBGene00018358	F42G8.7	IV:8123104-8127241	N2	rnp-6	OK	2.51627	1.37024	-0.876859	-1.82071	0.0026	0.0210083	yes	GO:0006457; GO:0005783; GO:1902175; GO:0016021; GO:0016020; GO:0019511; GO:0003756; GO:0045454; GO:0031545; GO:0034976	regulation of oxidative stress-induced intrinsic apoptotic signaling pathway; protein disulfide isomerase activity; protein folding; endoplasmic reticulum; response to endoplasmic reticulum stress; peptidyl-proline hydroxylation; peptidyl-proline 4-dioxygenase activity; membrane; integral component of membrane; cell redox homeostasis	protein_coding
WBGene00020373	gpx-6	IV:8222209-8223458	N2	rnp-6	OK	2.58632	1.21399	-1.09115	-1.67845	0.0062	0.0413837	yes	GO:0005615; GO:0006979; GO:0098869; GO:0055114; GO:0004601; GO:0004602; GO:0016491	extracellular space; glutathione peroxidase activity; cellular oxidant detoxification; oxidoreductase activity; oxidation-reduction process; response to oxidative stress; peroxidase activity	protein_coding
WBGene00001906	his-32	IV:8334297-8334765	N2	rnp-6	OK	477.836	362.354	-0.399115	-1.71192	0.0028	0.0222533	yes	GO:0005634; GO:0003677; GO:0031492; GO:0000786; GO:0046982; GO:0005694; GO:0006334	nucleosome; DNA binding; protein heterodimerization activity; nucleosome assembly; nucleus; nucleosomal DNA binding; chromosome	protein_coding
WBGene00001908	his-34	IV:8335971-8336340	N2	rnp-6	OK	6.11256	96.7597	3.98456	8.48232	5e-05	0.000725861	yes	GO:0000786; GO:0005634; GO:0005811; GO:0000785; GO:0035267; GO:0003677; GO:0046982; GO:0005694; GO:0006334	nucleosome; chromatin; DNA binding; lipid droplet; NuA4 histone acetyltransferase complex; protein heterodimerization activity; nucleosome assembly; nucleus; chromosome	protein_coding
WBGene00017541	F17E9.4	IV:8348372-8349170	N2	rnp-6	OK	150.845	71.2655	-1.08179	-4.06311	5e-05	0.000725861	yes			protein_coding
WBGene00017071	aagr-1	IV:8366538-8375372	N2	rnp-6	OK	30.7633	16.4364	-0.904317	-3.64386	5e-05	0.000725861	yes	GO:0016787; GO:0005975; GO:0005980; GO:0030246; GO:0016798; GO:0005764; GO:0003824; GO:0008152; GO:0004553; GO:0004558	hydrolase activity, acting on glycosyl bonds; carbohydrate binding; hydrolase activity, hydrolyzing O-glycosyl compounds; hydrolase activity; catalytic activity; carbohydrate metabolic process; alpha-1,4-glucosidase activity; glycogen catabolic process; metabolic process; lysosome	protein_coding
WBGene00022005	Y59H11AM.1	IV:8571437-8571821	N2	rnp-6	OK	0	0.765837	inf		5e-05	0.000725861	yes	GO:0005856	cytoskeleton	protein_coding
WBGene00018335	F42A9.6	IV:8609238-8611490	N2	rnp-6	OK	11.4841	26.2459	1.19245	3.32696	5e-05	0.000725861	yes	GO:0016021; GO:0016020	integral component of membrane; membrane	protein_coding
WBGene00000397	cdh-5	IV:8669141-8676542	N2	rnp-6	OK	1.92755	3.12485	0.697021	2.07406	0.00015	0.00195025	yes	GO:0016021; GO:0016020; GO:0005509; GO:0005886; GO:0007155; GO:0007156	calcium ion binding; homophilic cell adhesion via plasma membrane adhesion molecules; membrane; cell adhesion; integral component of membrane; plasma membrane	protein_coding
WBGene00255375	F08B4.8	IV:8677602-8678019	N2	rnp-6	OK	1.07826	2.99385	1.47329	1.77287	0.0071	0.0459858	yes			protein_coding
WBGene00045183	T28C6.10	IV:8818647-8819130	N2	rnp-6	OK	3.44076	1.30484	-1.39886	-1.82439	0.0053	0.0367133	yes			protein_coding
WBGene00012119	T28C6.3	IV:8820355-8821239	N2	rnp-6	OK	6.52696	3.19762	-1.02941	-2.18035	0.00045	0.00504819	yes	GO:0016021; GO:0016020	integral component of membrane; membrane	protein_coding
WBGene00011706	T11B7.1	IV:8840724-8842805	N2	rnp-6	OK	14.6552	8.41529	-0.800324	-2.57457	5e-05	0.000725861	yes	GO:0005515	protein binding	protein_coding
WBGene00000266	bre-1	IV:8987129-8990443	N2	rnp-6	OK	42.2491	20.0232	-1.07725	-4.00426	5e-05	0.000725861	yes	GO:0008446; GO:0019673; GO:0005783; GO:0030968; GO:0016829; GO:0042350; GO:0042351; GO:0030017; GO:0055120; GO:0017085; GO:0075015;	; GDP-mannose 4,6-dehydratase activity; lyase activity; endoplasmic reticulum unfolded protein response; striated muscle dense body; GDP-mannose metabolic process; endoplasmic reticulum; response to insecticide; GDP-L-fucose biosynthetic process; 'de novo' GDP-L-fucose biosynthetic process; sarcomere; formation of infection structure on or near host	protein_coding
WBGene00006941	wnk-1	IV:9200115-9212232	N2	rnp-6	OK	40.0735	50.8573	0.343807	1.58262	0.0057	0.0388114	yes	; GO:0006468; GO:0006972; GO:0000122; GO:0016310; GO:0005829; GO:0016301; GO:0050891; GO:0000166; GO:0004674; GO:0016740; GO:0005515; GO:0004672; GO:0035556; GO:0061404; GO:0007275; GO:0005524	; negative regulation of transcription from RNA polymerase II promoter; intracellular signal transduction; protein phosphorylation; cytosol; transferase activity; phosphorylation; protein kinase activity; kinase activity; multicellular organismal water homeostasis; positive regulation of transcription from RNA polymerase II promoter in response to increased salt; ATP binding; protein binding; hyp…	protein_coding
WBGene00008114	C46C2.6	IV:9212420-9214419	N2	rnp-6	OK	0.42523	1.5907	1.90334	1.51951	0.0064	0.0424098	yes			protein_coding
WBGene00008110	C46C2.2	IV:9216951-9220397	N2	rnp-6	OK	40.4891	28.9747	-0.482742	-1.96447	0.00075	0.00772691	yes	GO:0008514; GO:0005215; GO:0016021; GO:0016020; GO:0015711; GO:0022857; GO:0005887; GO:0055085	transporter activity; integral component of plasma membrane; organic anion transport; organic anion transmembrane transporter activity; integral component of membrane; transmembrane transporter activity; membrane; transmembrane transport	protein_coding
WBGene00009884	F49C12.15	IV:9324441-9327532	N2	rnp-6	OK	0.57334	1.05105	0.874367	1.77926	0.00245	0.0200889	yes			protein_coding
WBGene00007507	C10C5.3	IV:9374764-9376492	N2	rnp-6	OK	8.17874	14.2799	0.804038	2.50621	5e-05	0.000725861	yes	GO:0005737; GO:0016787; GO:0006520; GO:0004046; GO:0008152; GO:0006508; GO:0008237	cellular amino acid metabolic process; aminoacylase activity; hydrolase activity; cytoplasm; metabolic process; metallopeptidase activity; proteolysis	protein_coding
WBGene00007508	C10C5.4	IV:9378602-9380450	N2	rnp-6	OK	13.6287	19.1159	0.488129	1.63905	0.0043	0.0312605	yes	GO:0005737; GO:0016787; GO:0006520; GO:0004046; GO:0008152; GO:0006508; GO:0008237	cellular amino acid metabolic process; aminoacylase activity; hydrolase activity; cytoplasm; metabolic process; metallopeptidase activity; proteolysis	protein_coding
WBGene00000775	cpin-1	IV:9449588-9457501	N2	rnp-6	OK	8.23737	5.20599	-0.662011	-1.83016	0.00185	0.016033	yes	GO:0016787; GO:0016810	hydrolase activity; hydrolase activity, acting on carbon-nitrogen (but not peptide) bonds	protein_coding
WBGene00003463	msp-76	IV:9688981-9689436	N2	rnp-6	OK	0.727696	3.80454	2.38631	3.10755	0.00055	0.00597832	yes	GO:0005856; GO:0005737; GO:0042995; GO:0031143	cytoplasm; cytoskeleton; cell projection; pseudopodium	protein_coding
WBGene00003465	msp-78	IV:9770029-9770456	N2	rnp-6	OK	1.0077	4.04299	2.00436	2.43932	0.00085	0.00858204	yes	GO:0005856; GO:0005737; GO:0042995; GO:0031143	cytoplasm; cytoskeleton; cell projection; pseudopodium	protein_coding
WBGene00003464	msp-77	IV:9894595-9895033	N2	rnp-6	OK	1.20873	3.48523	1.52777	1.94187	0.0021	0.0177668	yes	GO:0005856; GO:0005737; GO:0042995; GO:0031143; GO:0043410; GO:0045987; GO:0001556	positive regulation of smooth muscle contraction; pseudopodium; cytoplasm; positive regulation of MAPK cascade; cytoskeleton; cell projection; oocyte maturation	protein_coding
WBGene00014665	C04G2.3	IV:10093060-10093511	N2	rnp-6	OK	0	1.06175	inf		5e-05	0.000725861	yes
WBGene00007308	C04G2.9	IV:10112890-10114231	N2	rnp-6	OK	0.670499	1.69707	1.33974	2.22318	0.0005	0.00551085	yes			protein_coding
WBGene00011774	ttr-54	IV:10156122-10156771	N2	rnp-6	OK	20.8376	12.9199	-0.68959	-1.81727	0.00315	0.0244316	yes	GO:0005615	extracellular space	protein_coding
WBGene00000698	col-124	IV:10214983-10219308	N2	rnp-6	OK	596.493	948.745	0.669514	2.7478	5e-05	0.000725861	yes	GO:0016021; GO:0016020; GO:0005581; GO:0042302	structural constituent of cuticle; collagen trimer; integral component of membrane; membrane	protein_coding
WBGene00012782	Y43C5A.2	IV:10269882-10272698	N2	rnp-6	OK	68.463	46.6437	-0.553642	-2.31355	5e-05	0.000725861	yes			protein_coding
WBGene00012783	Y43C5A.3	IV:10274035-10275411	N2	rnp-6	OK	53.2039	35.9287	-0.566397	-1.99005	0.0005	0.00551085	yes	GO:0050829; GO:0003690; GO:0031640	double-stranded DNA binding; killing of cells of other organism; defense response to Gram-negative bacterium	protein_coding
WBGene00011240	R11A8.7	IV:10374904-10387296	N2	rnp-6	OK	46.4136	58.9739	0.345528	1.54229	0.0064	0.0424098	yes	GO:0005737; GO:0005515; GO:0005575; GO:0008150; GO:0003723; GO:0003676; GO:0003674	nucleic acid binding; RNA binding; molecular_function; cellular_component; cytoplasm; biological_process; protein binding	protein_coding
WBGene00011222	R10H10.3	IV:10388492-10393294	N2	rnp-6	OK	99.0458	56.7414	-0.803693	-3.36157	5e-05	0.000725861	yes			protein_coding
WBGene00011184	R09H10.7	IV:10621192-10621691	N2	rnp-6	OK	6.1136	12.2351	1.00093	1.67706	0.00505	0.0353622	yes	GO:0016021; GO:0016020	integral component of membrane; membrane	protein_coding
WBGene00001476	fmo-1	IV:10661856-10664404	N2	rnp-6	OK	4.06953	7.04334	0.791396	2.32893	0.0001	0.00135972	yes	GO:0004497; GO:0050660; GO:0016021; GO:0016020; GO:0004499; GO:0050661; GO:0055114; GO:0016491	N,N-dimethylaniline monooxygenase activity; flavin adenine dinucleotide binding; monooxygenase activity; NADP binding; oxidation-reduction process; membrane; integral component of membrane; oxidoreductase activity	protein_coding
WBGene00001477	fmo-2	IV:10682523-10684385	N2	rnp-6	OK	28.6048	46.132	0.689511	2.78365	5e-05	0.000725861	yes	GO:0005737; GO:0004497; GO:0050660; GO:0016021; GO:0016020; GO:0004499; GO:0050661; GO:0055114; GO:0016491	N,N-dimethylaniline monooxygenase activity; cytoplasm; oxidoreductase activity; monooxygenase activity; flavin adenine dinucleotide binding; NADP binding; oxidation-reduction process; membrane; integral component of membrane	protein_coding
WBGene00014006	ZK596.1	IV:10900371-10901383	N2	rnp-6	OK	24.4322	53.8513	1.1402	3.99381	5e-05	0.000725861	yes			protein_coding
WBGene00014002	ZK593.2	IV:10913360-10914562	N2	rnp-6	OK	7.38871	3.26758	-1.1771	-2.29861	0.00025	0.00303907	yes			protein_coding
WBGene00014003	ZK593.3	IV:10916614-10917692	N2	rnp-6	OK	11.9715	49.8507	2.05801	5.78913	5e-05	0.000725861	yes	GO:0016021; GO:0016020	integral component of membrane; membrane	protein_coding
WBGene00014505	T05E11.9	IV:11106417-11107579	N2	rnp-6	OK	99.8223	62.4573	-0.676491	-2.84822	5e-05	0.000725861	yes
WBGene00003657	nhr-67	IV:11169833-11174785	N2	rnp-6	OK	2.6459	1.50891	-0.810247	-1.76015	0.0034	0.0259387	yes	GO:0043565; GO:0071158; GO:0000977; GO:0005515; GO:0003700; GO:0005634; GO:0030154; GO:0035262; GO:0006355; GO:0030334; GO:0045944; GO:0008270; GO:0043401; GO:0003677; GO:0046872; GO:0006351	positive regulation of cell cycle arrest; positive regulation of transcription from RNA polymerase II promoter; steroid hormone mediated signaling pathway; regulation of transcription, DNA-templated; DNA binding; regulation of cell migration; zinc ion binding; nucleus; metal ion binding; gonad morphogenesis; sequence-specific DNA binding; protein binding; transcription, DNA-templated; cell differ…	protein_coding
WBGene00000699	col-125	IV:11225504-11226519	N2	rnp-6	OK	1.53982	3.81225	1.30788	2.56194	5e-05	0.000725861	yes	GO:0016021; GO:0016020; GO:0005581; GO:0042302	structural constituent of cuticle; collagen trimer; integral component of membrane; membrane	protein_coding
WBGene00195927	F54D1.17	IV:11286256-11286403	N2	rnp-6	OK	3.33912	0	-inf		0.00135	0.0124346	yes
WBGene00044290	B0035.18	IV:11320319-11320643	N2	rnp-6	OK	80.9185	25.7534	-1.6517	-4.10032	5e-05	0.000725861	yes	GO:0004129; GO:1902600; GO:0016021; GO:0016020	hydrogen ion transmembrane transport; cytochrome-c oxidase activity; integral component of membrane; membrane	protein_coding
WBGene00235095	B0035.21	IV:11327355-11327569	N2	rnp-6	OK	3.19846	0	-inf		0.00185	0.016033	yes			protein_coding
WBGene00014076	ZK792.1	IV:11659799-11665203	N2	rnp-6	OK	14.4757	10.1256	-0.515622	-1.70136	0.003	0.0235082	yes	GO:0016311; GO:0016021; GO:0016020; GO:0003993	acid phosphatase activity; dephosphorylation; integral component of membrane; membrane	protein_coding
WBGene00014095	gdh-1	IV:11953248-11955541	N2	rnp-6	OK	202.981	299.334	0.560409	2.60277	5e-05	0.000725861	yes	GO:0004352; GO:0006520; GO:0016639; GO:0055114; GO:0016491	oxidoreductase activity, acting on the CH-NH2 group of donors, NAD or NADP as acceptor; cellular amino acid metabolic process; glutamate dehydrogenase (NAD+) activity; oxidation-reduction process; oxidoreductase activity	protein_coding
WBGene00000122	aly-3	IV:12123154-12124810	N2	rnp-6	OK	233.402	172.866	-0.433169	-1.95323	0.0006	0.00643061	yes	GO:0003676	nucleic acid binding	protein_coding
WBGene00009435	F35G2.1	IV:12200977-12207930	N2	rnp-6	OK	45.1231	59.0687	0.388529	1.72713	0.0026	0.0210083	yes	GO:0016971; GO:0016972; GO:0005615; GO:0003756; GO:0030173; GO:0045454; GO:0055114; GO:0016491	extracellular space; protein disulfide isomerase activity; integral component of Golgi membrane; oxidoreductase activity; thiol oxidase activity; oxidation-reduction process; flavin-linked sulfhydryl oxidase activity; cell redox homeostasis	protein_coding
WBGene00009438	F35G2.5	IV:12219683-12222821	N2	rnp-6	OK	0.435186	0	-inf		5e-05	0.000725861	yes	GO:0016021; GO:0016020	integral component of membrane; membrane	protein_coding
WBGene00008584	F08G5.6	IV:12435826-12438274	N2	rnp-6	OK	17.9931	5.11154	-1.81561	-5.06021	5e-05	0.000725861	yes	GO:0050829; GO:0045087; GO:0045121	innate immune response; membrane raft; defense response to Gram-negative bacterium	protein_coding
WBGene00007778	C27D8.2	IV:12712769-12714755	N2	rnp-6	OK	2.38339	0.499169	-2.25541	-3.83099	5e-05	0.000725861	yes			protein_coding
WBGene00045067	F07C6.6	IV:12792794-12793274	N2	rnp-6	OK	1.47544	4.46557	1.5977	2.23644	0.0005	0.00551085	yes	GO:0016021; GO:0016020	integral component of membrane; membrane	protein_coding
WBGene00008555	F07C6.4	IV:12805930-12830109	N2	rnp-6	OK	31.4785	42.6814	0.439242	1.81068	0.00175	0.015327	yes	GO:0005856;	; cytoskeleton	protein_coding
WBGene00007867	C32H11.4	IV:12921287-12923292	N2	rnp-6	OK	4.83427	1.34343	-1.84737	-3.77142	5e-05	0.000725861	yes	GO:0045087	innate immune response	protein_coding
WBGene00010128	F55G11.8	IV:12962807-12964624	N2	rnp-6	OK	8.87205	5.16849	-0.779525	-2.08182	0.0007	0.00728567	yes	GO:0045087	innate immune response	protein_coding
WBGene00010125	dod-22	IV:12965386-12967376	N2	rnp-6	OK	23.8574	9.30041	-1.35907	-4.15018	5e-05	0.000725861	yes	GO:0050829; ; GO:0045087	; innate immune response; defense response to Gram-negative bacterium	protein_coding
WBGene00010745	dod-17	IV:12976292-12978344	N2	rnp-6	OK	1.78344	0.381416	-2.22523	-3.17031	5e-05	0.000725861	yes	GO:0045087	innate immune response	protein_coding
WBGene00009896	scl-3	IV:13059617-13060695	N2	rnp-6	OK	5.78802	13.4951	1.2213	3.15846	5e-05	0.000725861	yes	GO:0005576	extracellular region	protein_coding
WBGene00008027	scl-5	IV:13064003-13065158	N2	rnp-6	OK	11.0402	16.3435	0.565959	1.57546	0.00675	0.0441976	yes	GO:0008150; GO:0003674; GO:0005615	extracellular space; molecular_function; biological_process	protein_coding
WBGene00008032	C39E9.8	IV:13079479-13082782	N2	rnp-6	OK	62.2397	90.4148	0.538725	2.1839	0.00015	0.00195025	yes			protein_coding
WBGene00010240	gadr-1	IV:13183071-13186984	N2	rnp-6	OK	1.05716	0.446229	-1.24434	-2.05266	0.0017	0.0149637	yes
WBGene00014941	Y67H2A.9	IV:13320157-13321831	N2	rnp-6	OK	13.5018	33.5751	1.31424	4.51754	5e-05	0.000725861	yes
WBGene00001390	far-6	IV:13328358-13329319	N2	rnp-6	OK	89.704	40.2535	-1.15606	-4.49208	5e-05	0.000725861	yes	GO:0008289	lipid binding	protein_coding
WBGene00003230	mex-5	IV:13353722-13356089	N2	rnp-6	OK	166.375	220.025	0.40323	1.86977	0.00105	0.0101691	yes	GO:0005737; GO:0032880; GO:0043186; GO:0005813; GO:0005829; GO:0019901; GO:0061158; GO:0003730; GO:0003677; GO:0008187; GO:0046872; GO:0007275; GO:0019904	3'-UTR-mediated mRNA destabilization; protein kinase binding; cytosol; cytoplasm; DNA binding; regulation of protein localization; P granule; metal ion binding; protein domain specific binding; mRNA 3'-UTR binding; poly-pyrimidine tract binding; multicellular organism development; centrosome	protein_coding
WBGene00013375	srsx-25	IV:13365168-13368381	N2	rnp-6	OK	3.93743	1.3867	-1.5056	-1.79131	0.00225	0.0187814	yes	GO:0016021; GO:0016020; GO:0007186; GO:0004930	G-protein coupled receptor signaling pathway; G-protein coupled receptor activity; integral component of membrane; membrane	protein_coding
WBGene00007455	ugt-22	IV:13639265-13644401	N2	rnp-6	OK	91.4919	62.2567	-0.555414	-2.283	5e-05	0.000725861	yes	GO:0008152; GO:0016021; GO:0016020; GO:0016740; GO:0016757; GO:0016758; GO:0015020; GO:0043231	transferase activity, transferring glycosyl groups; transferase activity; membrane; transferase activity, transferring hexosyl groups; metabolic process; glucuronosyltransferase activity; intracellular membrane-bounded organelle; integral component of membrane	protein_coding
WBGene00171916	ugt-22	IV:13639265-13644401	N2	rnp-6	OK	91.4919	62.2567	-0.555414	-2.283	5e-05	0.000725861	yes
WBGene00049149	ugt-22	IV:13639265-13644401	N2	rnp-6	OK	91.4919	62.2567	-0.555414	-2.283	5e-05	0.000725861	yes
WBGene00047784	ugt-22	IV:13639265-13644401	N2	rnp-6	OK	91.4919	62.2567	-0.555414	-2.283	5e-05	0.000725861	yes
WBGene00008123	ent-4	IV:13726929-13732723	N2	rnp-6	OK	10.9127	6.97242	-0.646273	-1.95449	0.0008	0.00816818	yes	GO:0016021; GO:0016020; GO:0005337; GO:0006810; GO:1901642	nucleoside transmembrane transporter activity; nucleoside transmembrane transport; integral component of membrane; transport; membrane	protein_coding
WBGene00012538	Y37A1B.5	IV:14051199-14056668	N2	rnp-6	OK	74.0712	106.142	0.519015	2.13491	5e-05	0.000725861	yes	GO:0008430; GO:0005515	protein binding; selenium binding	protein_coding
WBGene00171449	Y37A1B.5	IV:14051199-14056668	N2	rnp-6	OK	74.0712	106.142	0.519015	2.13491	5e-05	0.000725861	yes
WBGene00047764	Y37A1B.5	IV:14051199-14056668	N2	rnp-6	OK	74.0712	106.142	0.519015	2.13491	5e-05	0.000725861	yes
WBGene00049765	Y37A1B.5	IV:14051199-14056668	N2	rnp-6	OK	74.0712	106.142	0.519015	2.13491	5e-05	0.000725861	yes
WBGene00010085	F55B11.3	IV:14424692-14425859	N2	rnp-6	OK	56.7281	81.9175	0.530106	2.1675	0.00035	0.00407043	yes			protein_coding
WBGene00013292	Y57G11A.4	IV:14482333-14486461	N2	rnp-6	OK	5.68698	3.04554	-0.900964	-2.03372	0.00065	0.0068644	yes			protein_coding
WBGene00013306	Y57G11C.1130,Y57G11C.8	IV:14781836-14783395	N2	rnp-6	OK	11.1473	20.0554	0.847292	2.49614	5e-05	0.000725861	yes			protein_coding
WBGene00194649	Y57G11C.1130,Y57G11C.8	IV:14781836-14783395	N2	rnp-6	OK	11.1473	20.0554	0.847292	2.49614	5e-05	0.000725861	yes			protein_coding
WBGene00013654	Y105C5B.15	IV:15951908-15954841	N2	rnp-6	OK	16.6846	24.1502	0.533522	1.85105	0.0015	0.0135324	yes	GO:0016311; GO:0016787; GO:0046872; GO:0003993	hydrolase activity; acid phosphatase activity; metal ion binding; dephosphorylation	protein_coding
WBGene00013996	ZK550.2	IV:17245597-17249749	N2	rnp-6	OK	0.658491	3.01358	2.19424	4.41804	5e-05	0.000725861	yes	GO:0016021; GO:0016020; GO:0055085	transmembrane transport; integral component of membrane; membrane	protein_coding
WBGene00008194	C49C3.4	IV:17320794-17328663	N2	rnp-6	OK	60.4727	42.6158	-0.504896	-2.28304	5e-05	0.000725861	yes	GO:0005515	protein binding	protein_coding
WBGene00023501	F11E6.11	IV:17442874-17443736	N2	rnp-6	OK	4.76949	2.07621	-1.19988	-2.22925	0.0005	0.00551085	yes	GO:0016021; GO:0016020	integral component of membrane; membrane	protein_coding
WBGene00008706	gba-3	IV:17473287-17479386	N2	rnp-6	OK	7.01454	4.58953	-0.612	-1.69287	0.0041	0.0300971	yes	GO:0016787; GO:0004348; GO:0005764; GO:0006680; GO:0006665; GO:0006629	glucosylceramide catabolic process; lysosome; hydrolase activity; glucosylceramidase activity; lipid metabolic process; sphingolipid metabolic process	protein_coding
WBGene00001099	dsc-4	IV:315052-320576	N2	rnp-6	OK	40.5261	22.3072	-0.861342	-3.61417	5e-05	0.000725861	yes	GO:0030968	endoplasmic reticulum unfolded protein response	protein_coding
WBGene00000675	col-101	IV:325075-330648	N2	rnp-6	OK	182.386	267.297	0.551451	2.43595	5e-05	0.000725861	yes	GO:0016021; GO:0016020; GO:0005581; GO:0042302	structural constituent of cuticle; collagen trimer; integral component of membrane; membrane	protein_coding
WBGene00022048	fln-1	IV:359238-376062	N2	rnp-6	OK	112.383	146.444	0.381929	1.6379	0.0048	0.0339756	yes	GO:0007015; GO:0071526; GO:0005884; GO:0005515; GO:0007411; GO:0007413; GO:0061038	actin filament; actin filament organization; protein binding; axon guidance; axonal fasciculation; uterus morphogenesis; semaphorin-plexin signaling pathway	protein_coding
WBGene00022047	Y66H1A.5	IV:428231-429084	N2	rnp-6	OK	29.369	19.8509	-0.565089	-1.79155	0.0019	0.0163938	yes			protein_coding
WBGene00019660	K11H12.4	IV:674037-675883	N2	rnp-6	OK	0.889982	1.62005	0.864189	1.56961	0.00725	0.0466777	yes	GO:0045087; GO:0045121	innate immune response; membrane raft	protein_coding
WBGene00044459	Y55F3C.9	IV:719815-727481	N2	rnp-6	OK	2.20097	1.09318	-1.0096	-2.07537	0.00035	0.00407043	yes	GO:0016021; GO:0016020; GO:0005515	protein binding; integral component of membrane; membrane	protein_coding
WBGene00000677	col-103	IV:762411-763678	N2	rnp-6	OK	34.6832	56.7542	0.71049	2.68739	5e-05	0.000725861	yes	GO:0005581; GO:0042302	structural constituent of cuticle; collagen trimer	protein_coding
WBGene00001103	dsl-1	IV:1207254-1208068	N2	rnp-6	OK	7.05424	4.29783	-0.714881	-1.65916	0.00465	0.03317	yes	GO:0005515; GO:0016021; GO:0016020; GO:0005112; GO:0005887; GO:0007154; GO:0001708; GO:0007275; GO:0000003	integral component of plasma membrane; protein binding; cell communication; cell fate specification; reproduction; membrane; multicellular organism development; Notch binding; integral component of membrane	protein_coding
WBGene00009523	clec-165	IV:1245398-1246872	N2	rnp-6	OK	1.06757	2.75802	1.3693	2.34318	0.0002	0.00250605	yes	GO:0030246	carbohydrate binding	protein_coding
WBGene00009518	clec-166	IV:1247385-1251517	N2	rnp-6	OK	1.51483	4.25765	1.49091	3.60459	5e-05	0.000725861	yes	GO:0045087; GO:0030246	innate immune response; carbohydrate binding	protein_coding
WBGene00018776	F53H1.1	IV:1297223-1309644	N2	rnp-6	OK	35.2156	46.7478	0.408685	1.73723	0.00195	0.0167396	yes	GO:0005737; GO:0016787; ; GO:0005730; GO:0000398; GO:0000166; GO:0004004; GO:0003676; GO:0004386; GO:0010501; GO:0010468; GO:0005524	; nucleic acid binding; nucleolus; ATP-dependent RNA helicase activity; hydrolase activity; cytoplasm; RNA secondary structure unwinding; regulation of gene expression; ATP binding; helicase activity; nucleotide binding; mRNA splicing, via spliceosome	protein_coding
WBGene00000678	col-104	IV:1353678-1355305	N2	rnp-6	OK	1.9759	4.13172	1.06423	2.17384	0.00015	0.00195025	yes	GO:0016021; GO:0016020; GO:0005581; GO:0042302	structural constituent of cuticle; collagen trimer; integral component of membrane; membrane	protein_coding
WBGene00044719	clec-172	IV:1515527-1516627	N2	rnp-6	OK	2.05745	0.364544	-2.49669	-2.38272	0.00565	0.0385456	yes	GO:0050830; GO:0030246	defense response to Gram-positive bacterium; carbohydrate binding	protein_coding
WBGene00000683	col-109	IV:1817044-1820253	N2	rnp-6	OK	0.543762	1.29626	1.25331	1.8628	0.00145	0.013173	yes	GO:0016021; GO:0016020; GO:0005581; GO:0030968; GO:0042302	endoplasmic reticulum unfolded protein response; structural constituent of cuticle; collagen trimer; integral component of membrane; membrane	protein_coding
WBGene00016027	C23H5.8	IV:2111889-2113422	N2	rnp-6	OK	72.6222	97.2976	0.421994	1.65434	0.0029	0.0228734	yes			protein_coding
WBGene00016919	C54E4.4	IV:2161475-2164870	N2	rnp-6	OK	1.27023	3.42133	1.42947	2.06541	0.0009	0.00897191	yes	GO:0016021; GO:0016020	integral component of membrane; membrane	protein_coding
WBGene00022096	Y69A2AR.25	IV:2565793-2568367	N2	rnp-6	OK	0.978584	1.84951	0.918373	1.62077	0.0063	0.0419085	yes			protein_coding
WBGene00044492	Y54G2A.49	IV:2851692-2853261	N2	rnp-6	OK	16.6421	5.89071	-1.49832	-3.20328	5e-05	0.000725861	yes	; GO:0016021; GO:0016020	; integral component of membrane; membrane	protein_coding
WBGene00021887	fbxc-45	IV:2919827-2922229	N2	rnp-6	OK	16.0816	22.9758	0.514707	1.71018	0.0024	0.0197654	yes			protein_coding
WBGene00022069	eel-1	IV:3032765-3050102	N2	rnp-6	OK	57.7397	79.452	0.46052	2.12419	0.0002	0.00250605	yes	GO:0005737; GO:0045167; GO:0030178; GO:0061630; GO:0031581; GO:0005622; GO:0043065; GO:0016567; GO:0016740; GO:0042787; GO:0005488; GO:0005515; GO:0005634; GO:0004842; GO:0010468; GO:0042770	asymmetric protein localization involved in cell fate determination; ubiquitin protein ligase activity; transferase activity; positive regulation of apoptotic process; intracellular; binding; regulation of gene expression; hemidesmosome assembly; cytoplasm; ubiquitin-protein transferase activity; signal transduction in response to DNA damage; negative regulation of Wnt signaling pathway; protein …	protein_coding
WBGene00003153	mca-3	IV:3103166-3133143	N2	rnp-6	OK	61.7105	86.2153	0.482427	2.20733	0.0002	0.00250605	yes	GO:0009792; GO:0016021; GO:0016020; GO:0000166; GO:0046872; GO:0005524; GO:0016787; GO:0099132; GO:0006811; GO:0006810; GO:0006816; GO:0005887; GO:0005886; GO:0045807; GO:0040010; GO:0006897; GO:0043231; GO:0040017; GO:0051481; GO:0002119; GO:0070588; GO:0005388	negative regulation of cytosolic calcium ion concentration; positive regulation of growth rate; hydrolase activity; intracellular membrane-bounded organelle; ATP hydrolysis coupled cation transmembrane transport; nucleotide binding; plasma membrane; ion transport; metal ion binding; membrane; ATP binding; positive regulation of endocytosis; calcium-transporting ATPase activity; integral component…	protein_coding
WBGene00044469	clec-173	IV:3266202-3267675	N2	rnp-6	OK	56.616	28.8155	-0.974366	-3.42172	5e-05	0.000725861	yes	GO:0030246	carbohydrate binding	protein_coding
WBGene00001119	dyf-3	IV:3396580-3399123	N2	rnp-6	OK	14.8648	8.6742	-0.777097	-2.33852	5e-05	0.000725861	yes	; GO:0030992; GO:0006935; GO:0060271; GO:0030030; GO:0005813; GO:0030425; GO:0030424; GO:0003674; GO:0010446; GO:0005929; GO:0042995; GO:0043025; GO:0007635	; axon; cilium; response to alkaline pH; chemosensory behavior; molecular_function; intraciliary transport particle B; neuronal cell body; dendrite; chemotaxis; cell projection organization; cilium assembly; cell projection; centrosome	protein_coding
WBGene00018145	F37C4.5	IV:3871830-3874416	N2	rnp-6	OK	77.0464	116.475	0.596219	2.69282	5e-05	0.000725861	yes	; GO:0005515	; protein binding	protein_coding
WBGene00016435	C35B1.5	IV:4083587-4084209	N2	rnp-6	OK	252.582	171.463	-0.558852	-2.36597	5e-05	0.000725861	yes	GO:0005737; GO:0098869; GO:0045454; GO:0004791	cytoplasm; thioredoxin-disulfide reductase activity; cellular oxidant detoxification; cell redox homeostasis	protein_coding
WBGene00018647	F49F1.7	IV:4123524-4125757	N2	rnp-6	OK	45.0993	25.6086	-0.816477	-2.53774	5e-05	0.000725861	yes			protein_coding
WBGene00019956	fbxb-75	IV:4439819-4441163	N2	rnp-6	OK	12.3024	5.71253	-1.10674	-3.10044	5e-05	0.000725861	yes	GO:0005515	protein binding	protein_coding
WBGene00019719	M01H9.3	IV:4468501-4477059	N2	rnp-6	OK	63.6312	83.4829	0.391745	1.63652	0.0053	0.0367133	yes			protein_coding
WBGene00021204	fbxb-77	IV:4754198-4756157	N2	rnp-6	OK	2.65054	1.44794	-0.87228	-1.76798	0.00295	0.0231897	yes			protein_coding
WBGene00021197	Y17G9A.4	IV:4860394-4861494	N2	rnp-6	OK	14.4629	7.95332	-0.862732	-2.2947	0.00015	0.00195025	yes	GO:0016021; GO:0016020	integral component of membrane; membrane	protein_coding
WBGene00003448	msp-55	IV:5055592-5056049	N2	rnp-6	OK	0.805353	3.4505	2.09911	2.46229	0.001	0.0097769	yes	GO:0005856; GO:0005737; GO:0042995; GO:0031143	cytoplasm; cytoskeleton; cell projection; pseudopodium	protein_coding
WBGene00003446	msp-53	IV:5064640-5065153	N2	rnp-6	OK	0.44592	1.66835	1.90357	1.84122	0.0073	0.0469136	yes	GO:0005856; GO:0005737; GO:0042995; GO:0031143	cytoplasm; cytoskeleton; cell projection; pseudopodium	protein_coding
WBGene00003452	msp-59	IV:5312689-5313146	N2	rnp-6	OK	1.73365	4.47585	1.36835	2.00905	0.00135	0.0124346	yes	GO:0005856; GO:0005737; GO:0042995; GO:0031143	cytoplasm; cytoskeleton; cell projection; pseudopodium	protein_coding
WBGene00021160	gba-4	IV:5344590-5350929	N2	rnp-6	OK	43.4405	25.2418	-0.783228	-2.31113	5e-05	0.000725861	yes	GO:0016787; GO:0004348; GO:0005764; GO:0006680; GO:0006665; GO:0006629	glucosylceramide catabolic process; lysosome; hydrolase activity; glucosylceramidase activity; lipid metabolic process; sphingolipid metabolic process	protein_coding
WBGene00047837	gba-4	IV:5344590-5350929	N2	rnp-6	OK	43.4405	25.2418	-0.783228	-2.31113	5e-05	0.000725861	yes
WBGene00047854	gba-4	IV:5344590-5350929	N2	rnp-6	OK	43.4405	25.2418	-0.783228	-2.31113	5e-05	0.000725861	yes
WBGene00166444	gba-4	IV:5344590-5350929	N2	rnp-6	OK	43.4405	25.2418	-0.783228	-2.31113	5e-05	0.000725861	yes
WBGene00021161	Y4C6B.7	IV:5351426-5353418	N2	rnp-6	OK	25.1949	11.2681	-1.16088	-2.8417	5e-05	0.000725861	yes			protein_coding
WBGene00001243	elo-5	IV:5369805-5377275	N2	rnp-6	OK	29.105	66.1518	1.18451	1.79414	0.00285	0.0225677	yes	GO:0006633; GO:0030148; GO:0006631; GO:0006629; GO:0034625; GO:0042761; GO:0016021; GO:0016020; GO:0009922; GO:0016740; GO:0030176; GO:0102337; GO:0102336; GO:0102338; GO:0019367; GO:0034626	fatty acid elongase activity; fatty acid elongation, polyunsaturated fatty acid; 3-oxo-lignoceronyl-CoA synthase activity; sphingolipid biosynthetic process; 3-oxo-cerotoyl-CoA synthase activity; fatty acid elongation, monounsaturated fatty acid; integral component of endoplasmic reticulum membrane; 3-oxo-arachidoyl-CoA synthase activity; transferase activity; fatty acid metabolic process; fatty …	protein_coding
WBGene00001244	elo-6	IV:5386626-5388559	N2	rnp-6	OK	124.381	202.023	0.699756	3.06757	5e-05	0.000725861	yes	GO:0006633; GO:0030148; GO:0006631; GO:0006629; GO:0034625; GO:0042761; GO:0016021; GO:0016020; GO:0009922; GO:0016740; GO:0030176; GO:0102337; GO:0102336; GO:0102338; GO:0019367; GO:0034626	fatty acid elongase activity; fatty acid elongation, polyunsaturated fatty acid; 3-oxo-lignoceronyl-CoA synthase activity; sphingolipid biosynthetic process; 3-oxo-cerotoyl-CoA synthase activity; fatty acid elongation, monounsaturated fatty acid; integral component of endoplasmic reticulum membrane; 3-oxo-arachidoyl-CoA synthase activity; transferase activity; fatty acid metabolic process; fatty …	protein_coding
WBGene00016542	C39H7.4	IV:5611089-5614608	N2	rnp-6	OK	25.8377	17.0183	-0.602385	-2.10991	5e-05	0.000725861	yes	GO:0016021; GO:0016020; GO:0045087	innate immune response; integral component of membrane; membrane	protein_coding
WBGene00004112	pqn-22	IV:6015192-6033639	N2	rnp-6	OK	15.511	28.2574	0.865335	1.82388	0.0013	0.0120757	yes			protein_coding
WBGene00168969	pqn-22	IV:6015192-6033639	N2	rnp-6	OK	15.511	28.2574	0.865335	1.82388	0.0013	0.0120757	yes
WBGene00000535	cpi-1	IV:6092598-6093648	N2	rnp-6	OK	109.555	75.9055	-0.52938	-1.96186	0.0006	0.00643061	yes	GO:0005615; GO:2000117; GO:0010466; GO:0030414; GO:0002020; GO:0004869	peptidase inhibitor activity; extracellular space; cysteine-type endopeptidase inhibitor activity; protease binding; negative regulation of cysteine-type endopeptidase activity; negative regulation of peptidase activity	protein_coding
WBGene00019060	F58F9.7	IV:6245340-6248524	N2	rnp-6	OK	51.2116	14.1319	-1.85752	-7.21231	5e-05	0.000725861	yes	GO:0006631; GO:0050660; GO:0006635; GO:0033539; GO:0016627; GO:0005777; GO:0071949; GO:0008152; GO:0003995; GO:0003997; GO:0055114	oxidoreductase activity, acting on the CH-CH group of donors; fatty acid beta-oxidation using acyl-CoA dehydrogenase; fatty acid metabolic process; flavin adenine dinucleotide binding; FAD binding; metabolic process; oxidation-reduction process; peroxisome; fatty acid beta-oxidation; acyl-CoA oxidase activity; acyl-CoA dehydrogenase activity	protein_coding
WBGene00006416	sams-5	IV:6277434-6279531	N2	rnp-6	OK	1.69391	2.84529	0.74822	1.65131	0.0048	0.0339756	yes	GO:0004478; GO:0006556; GO:0006730; GO:0000166; GO:0016740; GO:0046872; GO:0005829; GO:0005524	methionine adenosyltransferase activity; S-adenosylmethionine biosynthetic process; one-carbon metabolic process; cytosol; transferase activity; ATP binding; nucleotide binding; metal ion binding	protein_coding
WBGene00004179	prg-2	IV:6526723-6529802	N2	rnp-6	OK	57.0891	42.2238	-0.435159	-1.89811	0.0013	0.0120757	yes	GO:0005515; GO:0003676	nucleic acid binding; protein binding	protein_coding
WBGene00017480	nstp-2	IV:6602668-6606188	N2	rnp-6	OK	118.386	88.6419	-0.417434	-1.73823	0.00275	0.0219448	yes	GO:0006810; GO:0005457; GO:0015783; GO:0005464; GO:0016021; GO:0016020; GO:0008643; GO:0005462; GO:0030176; GO:0015790; GO:0030173; GO:1990569; GO:0055085	UDP-N-acetylglucosamine transmembrane transporter activity; integral component of Golgi membrane; UDP-xylose transmembrane transporter activity; GDP-fucose transmembrane transporter activity; integral component of endoplasmic reticulum membrane; GDP-fucose transmembrane transport; UDP-xylose transmembrane transport; integral component of membrane; carbohydrate transport; membrane; UDP-N-acetylglu…	protein_coding
WBGene00015932	C17H12.6	IV:6821065-6822506	N2	rnp-6	OK	2.12884	0.285086	-2.9006	-2.90008	0.00025	0.00303907	yes	GO:0050829; ; GO:0045087; GO:0045121	; innate immune response; membrane raft; defense response to Gram-negative bacterium	protein_coding
WBGene00006608	tre-2	IV:6876729-6883442	N2	rnp-6	OK	21.9949	29.6642	0.431557	1.70106	0.0034	0.0259387	yes	GO:0016787; GO:0003824; GO:0016798; GO:0005991; GO:0004555; GO:0008152	hydrolase activity, acting on glycosyl bonds; hydrolase activity; catalytic activity; metabolic process; alpha,alpha-trehalase activity; trehalose metabolic process	protein_coding
WBGene00236787	T22D1.22	IV:6920780-6921027	N2	rnp-6	OK	0.884988	0	-inf		0.00285	0.0225677	yes
WBGene00044504	R13A1.10	IV:7225379-7227172	N2	rnp-6	OK	2.10217	0.867457	-1.27702	-2.15107	0.00075	0.00772691	yes	GO:0005515	protein binding	protein_coding
WBGene00018345	F42C5.3	IV:7286181-7287569	N2	rnp-6	OK	0.191375	0.915909	2.2588	1.80571	0.0049	0.0345471	yes			protein_coding
WBGene00017418	F13B6.3	IV:7461963-7465957	N2	rnp-6	OK	3.75366	2.12023	-0.824076	-1.91439	0.0014	0.0128195	yes			protein_coding
WBGene00003758	nlp-20	IV:7642056-7643125	N2	rnp-6	OK	24.1863	15.9531	-0.600357	-1.61755	0.00585	0.0395707	yes	GO:0007218	neuropeptide signaling pathway	protein_coding
WBGene00016378	imp-3	IV:7785973-7789508	N2	rnp-6	OK	42.4844	27.5677	-0.623952	-2.54329	5e-05	0.000725861	yes	GO:0030660; GO:0016021; GO:0016020; GO:0005765; GO:0071556; GO:0004190; GO:0071458; GO:0006508; GO:0008233	aspartic-type endopeptidase activity; peptidase activity; integral component of cytoplasmic side of endoplasmic reticulum membrane; lysosomal membrane; Golgi-associated vesicle membrane; integral component of lumenal side of endoplasmic reticulum membrane; membrane; proteolysis; integral component of membrane	protein_coding
WBGene00016795	C49H3.12	IV:7926600-7927291	N2	rnp-6	OK	6.04859	1.91237	-1.66123	-2.36905	0.00155	0.013881	yes			protein_coding
WBGene00017644	exc-9	IV:7939811-7940850	N2	rnp-6	OK	16.8782	9.74022	-0.793136	-1.94344	0.0011	0.0105816	yes	GO:0005737; GO:0045138; GO:0035150; GO:0001738; GO:0008270; GO:0005515; GO:0010171; GO:0046872; GO:0002064	morphogenesis of a polarized epithelium; epithelial cell development; cytoplasm; body morphogenesis; regulation of tube size; metal ion binding; protein binding; zinc ion binding; nematode male tail tip morphogenesis	protein_coding
WBGene00003625	nhr-31	IV:8022718-8029513	N2	rnp-6	OK	16.062	10.988	-0.547725	-2.00533	0.00065	0.0068644	yes	GO:0009755; GO:0043565; GO:0003682; GO:0030522; GO:0003700; GO:0006970; GO:0005634; GO:0009888; GO:0003707; GO:0006355; GO:0090575; GO:0009792; GO:0045944; GO:0008270; GO:0043401; GO:0003677; GO:0000976; GO:0009886; GO:0046872; GO:0004879; GO:0006351	embryo development ending in birth or egg hatching; chromatin binding; hormone-mediated signaling pathway; steroid hormone mediated signaling pathway; response to osmotic stress; regulation of transcription, DNA-templated; DNA binding; intracellular receptor signaling pathway; RNA polymerase II transcription factor complex; zinc ion binding; post-embryonic animal morphogenesis; nucleus; metal ion…	protein_coding
WBGene00015052	clec-52	IV:8167162-8168774	N2	rnp-6	OK	6.23995	17.6647	1.50126	4.26199	5e-05	0.000725861	yes	GO:0004888; GO:0050830; GO:0007165; GO:0005887; GO:0030246	integral component of plasma membrane; defense response to Gram-positive bacterium; signal transduction; carbohydrate binding; transmembrane signaling receptor activity	protein_coding
WBGene00044510	K07H8.11	IV:8273117-8275332	N2	rnp-6	OK	0.81259	1.98539	1.28882	2.19028	0.00025	0.00303907	yes			protein_coding
WBGene00001903	his-29	IV:8331043-8331412	N2	rnp-6	OK	6.34877	2.29025	-1.47097	-2.17635	0.00135	0.0124346	yes	GO:0000786; GO:0005634; GO:0005811; GO:0000785; GO:0035267; GO:0003677; GO:0046982; GO:0005694; GO:0006334	nucleosome; chromatin; DNA binding; lipid droplet; NuA4 histone acetyltransferase complex; protein heterodimerization activity; nucleosome assembly; nucleus; chromosome	protein_coding
WBGene00001905	his-31	IV:8333671-8334005	N2	rnp-6	OK	395.251	286.366	-0.46491	-1.87827	0.0012	0.0113201	yes	GO:0042393; GO:0005634; GO:0003677; GO:0000786; GO:0000788; GO:0046982; GO:0005694; GO:0006334	nucleosome; histone binding; DNA binding; protein heterodimerization activity; nucleosome assembly; nuclear nucleosome; nucleus; chromosome	protein_coding
WBGene00020139	T01B11.2	IV:8449348-8451771	N2	rnp-6	OK	32.3987	21.6291	-0.582964	-2.21538	5e-05	0.000725861	yes	GO:0008453; GO:0008483; GO:0005739; GO:0003824; GO:0016740; GO:0030170; GO:0042802	pyridoxal phosphate binding; transferase activity; identical protein binding; transaminase activity; catalytic activity; mitochondrion; alanine-glyoxylate transaminase activity	protein_coding
WBGene00004052	parg-2	IV:8712412-8715027	N2	rnp-6	OK	0.290566	0.756671	1.3808	2.01407	0.00125	0.0117015	yes	GO:0005737; GO:0016787; GO:0005975; GO:0004649; GO:0009225; GO:0010332; GO:0006974	nucleotide-sugar metabolic process; response to gamma radiation; poly(ADP-ribose) glycohydrolase activity; hydrolase activity; cytoplasm; carbohydrate metabolic process; cellular response to DNA damage stimulus	protein_coding
WBGene00008970	F20C5.5	IV:8767687-8770092	N2	rnp-6	OK	1.0214	0.579214	-0.818381	-1.54524	0.00745	0.0476127	yes			protein_coding
WBGene00007902	C33D9.6	IV:8773951-8778145	N2	rnp-6	OK	9.04544	5.86028	-0.626221	-1.70373	0.0033	0.025334	yes
WBGene00007900	C33D9.6	IV:8773951-8778145	N2	rnp-6	OK	9.04544	5.86028	-0.626221	-1.70373	0.0033	0.025334	yes			protein_coding
WBGene00194651	C33D9.13	IV:8783321-8785239	N2	rnp-6	OK	5.86488	2.93547	-0.998511	-2.53196	5e-05	0.000725861	yes			protein_coding
WBGene00006852	unc-129	IV:9002836-9005410	N2	rnp-6	OK	6.43693	3.9606	-0.700654	-1.91684	0.00115	0.01096	yes	GO:0040011; GO:0045138; GO:0005125; GO:0005615; GO:0033563; GO:0060395; GO:0005160; GO:0043408; GO:0043057; GO:0030509; GO:0040039; GO:0005576; GO:0008045; GO:0005102; GO:0010862; GO:0042981; GO:0008083	dorsal/ventral axon guidance; extracellular space; growth factor activity; SMAD protein signal transduction; motor neuron axon guidance; receptor binding; extracellular region; cytokine activity; inductive cell migration; regulation of MAPK cascade; regulation of apoptotic process; BMP signaling pathway; positive regulation of pathway-restricted SMAD protein phosphorylation; locomotion; transform…	protein_coding
WBGene00013516	Y73F4A.3	IV:9039571-9040493	N2	rnp-6	OK	1.56328	5.01403	1.68139	2.89435	5e-05	0.000725861	yes			protein_coding
WBGene00003957	pcp-2	IV:9160639-9165127	N2	rnp-6	OK	18.434	3.54203	-2.37972	-7.85436	5e-05	0.000725861	yes	GO:0008239; GO:0006508; GO:0045121; GO:0008236	proteolysis; dipeptidyl-peptidase activity; membrane raft; serine-type peptidase activity	protein_coding
WBGene00009872	F49C12.2	IV:9297959-9299245	N2	rnp-6	OK	0.957173	0.188961	-2.34069	-2.40291	0.0018	0.0156835	yes			protein_coding
WBGene00009877	F49C12.7	IV:9309107-9312927	N2	rnp-6	OK	21.7892	11.5049	-0.921367	-3.11577	5e-05	0.000725861	yes			protein_coding
WBGene00007505	pezo-1	IV:9343357-9366506	N2	rnp-6	OK	24.1474	31.7277	0.393875	1.77123	0.0024	0.0197654	yes	GO:0042391; GO:0005261; GO:0050982; GO:0016021; GO:0016020; GO:0009612; GO:0034220; GO:0005886; GO:0098655; GO:0008381; GO:0071260	regulation of membrane potential; ion transmembrane transport; cation channel activity; cation transmembrane transport; mechanosensitive ion channel activity; membrane; response to mechanical stimulus; cellular response to mechanical stimulus; integral component of membrane; plasma membrane; detection of mechanical stimulus	protein_coding
WBGene00009544	F38E11.9	IV:9442904-9444516	N2	rnp-6	OK	4.85544	2.73135	-0.829987	-1.81957	0.0021	0.0177668	yes			protein_coding
WBGene00004031	pis-1	IV:9791939-9796589	N2	rnp-6	OK	16.6815	22.2229	0.4138	1.72155	0.0034	0.0259387	yes	; GO:0044666	; MLL3/4 complex	protein_coding
WBGene00006056	sss-1	IV:9892738-9893749	N2	rnp-6	OK	0.697765	2.35604	1.75555	2.68256	0.0001	0.00135972	yes			protein_coding
WBGene00001650	gon-1	IV:9935066-9953429	N2	rnp-6	OK	3.64905	4.90171	0.425763	1.54798	0.00725	0.0466777	yes	GO:1905607; GO:0005783; GO:0005794; GO:0031012; GO:0046872; GO:0008270; GO:0008233; GO:0007275; GO:0008237; GO:0005737; GO:0006888; GO:0008406; GO:0006508; GO:0016477; GO:0048644; GO:0016787; GO:0004222; GO:0006810; GO:0005604; GO:0016192; GO:0005576; GO:0015031; GO:0005578	Golgi apparatus; hydrolase activity; cytoplasm; vesicle-mediated transport; zinc ion binding; basement membrane; proteolysis; transport; cell migration; extracellular matrix; peptidase activity; metalloendopeptidase activity; endoplasmic reticulum; metal ion binding; multicellular organism development; negative regulation of presynapse assembly; gonad development; ER to Golgi vesicle-mediated tra…	protein_coding
WBGene00009681	gipc-2	IV:10026410-10027665	N2	rnp-6	OK	0.789558	2.24931	1.51037	2.57678	0.00015	0.00195025	yes	GO:0031982; GO:0005515	protein binding; vesicle	protein_coding
WBGene00195709	K04D7.8	IV:10175144-10175378	N2	rnp-6	OK	0	0.95872	inf		0.00715	0.0462067	yes
WBGene00001158	ech-9	IV:10233319-10235329	N2	rnp-6	OK	51.3071	24.2161	-1.08319	-4.23856	5e-05	0.000725861	yes	GO:0006631; GO:0046872; GO:0006635; GO:0005777; GO:0003857; GO:0055114; GO:0016491	3-hydroxyacyl-CoA dehydrogenase activity; fatty acid metabolic process; oxidoreductase activity; metal ion binding; peroxisome; fatty acid beta-oxidation; oxidation-reduction process	protein_coding
WBGene00011175	R09E10.5	IV:10296086-10302310	N2	rnp-6	OK	7.17277	4.61254	-0.636968	-2.14161	0.00025	0.00303907	yes	GO:0007160; GO:0016021; GO:0016020	cell-matrix adhesion; integral component of membrane; membrane	protein_coding
WBGene00008732	F13B12.4	IV:10444608-10449899	N2	rnp-6	OK	0.42449	0.130815	-1.69821	-1.50299	0.00535	0.0369777	yes	GO:0005737; GO:0030170	cytoplasm; pyridoxal phosphate binding	protein_coding
WBGene00008490	F01D4.8	IV:10450807-10453098	N2	rnp-6	OK	8.43656	5.55067	-0.603993	-1.68863	0.00345	0.0262347	yes	GO:0005737; GO:0030170	cytoplasm; pyridoxal phosphate binding	protein_coding
WBGene00008488	F01D4.5	IV:10482624-10483648	N2	rnp-6	OK	45.4816	28.3723	-0.680798	-2.37213	0.0001	0.00135972	yes	GO:0003700; GO:0044212; GO:0005634; GO:0045944;	; transcription regulatory region DNA binding; nucleus; DNA binding transcription factor activity; positive regulation of transcription from RNA polymerase II promoter	protein_coding
WBGene00011182	R09H10.5	IV:10621715-10628841	N2	rnp-6	OK	64.444	43.3469	-0.572117	-2.64234	5e-05	0.000725861	yes	; GO:0005515	; protein binding	protein_coding
WBGene00044977	F56C4.4	IV:10629046-10631245	N2	rnp-6	OK	5.40526	2.58059	-1.06666	-1.73171	0.0043	0.0312605	yes			protein_coding
WBGene00007384	swt-3	IV:10778985-10780711	N2	rnp-6	OK	7.68596	19.3859	1.33471	4.35389	5e-05	0.000725861	yes	GO:0006810; GO:0051119; GO:0016021; GO:0016020; GO:0008643; GO:0034219	carbohydrate transmembrane transport; carbohydrate transport; membrane; sugar transmembrane transporter activity; integral component of membrane; transport	protein_coding
WBGene00011258	best-15	IV:10829550-10832248	N2	rnp-6	OK	1.73918	0.780998	-1.15501	-2.27915	0.0004	0.00457121	yes	GO:0006810; GO:1902476; GO:0016021; GO:0016020; GO:0034707; GO:0006821; GO:0005886; GO:0005254; GO:0006811	chloride channel complex; chloride transmembrane transport; chloride transport; chloride channel activity; ion transport; plasma membrane; membrane; integral component of membrane; transport	protein_coding
WBGene00008755	sdz-13	IV:10877835-10880716	N2	rnp-6	OK	1.33025	0.550435	-1.27305	-1.80915	0.00245	0.0200889	yes			protein_coding
WBGene00206470	sdz-13	IV:10877835-10880716	N2	rnp-6	OK	1.33025	0.550435	-1.27305	-1.80915	0.00245	0.0200889	yes
WBGene00012383	ttr-17	IV:11066005-11067072	N2	rnp-6	OK	109.741	75.1396	-0.546458	-2.0283	0.0003	0.00356315	yes	GO:0005615	extracellular space	protein_coding
WBGene00011128	R07H5.8	IV:11209300-11210831	N2	rnp-6	OK	171.985	226.867	0.399561	1.83214	0.0016	0.014229	yes	GO:0016773; GO:0005634; GO:0004001; GO:0006167; GO:0006166; GO:0005515; GO:0006169; GO:0005829	AMP biosynthetic process; adenosine kinase activity; cytosol; protein binding; purine ribonucleoside salvage; nucleus; phosphotransferase activity, alcohol group as acceptor; adenosine salvage	protein_coding
WBGene00007808	best-7	IV:11226588-11230249	N2	rnp-6	OK	6.15093	11.4299	0.893936	2.85408	5e-05	0.000725861	yes	GO:0006810; GO:1902476; GO:0016021; GO:0016020; GO:0034707; GO:0006821; GO:0005886; GO:0005254; GO:0006811	chloride channel complex; chloride transmembrane transport; chloride transport; chloride channel activity; ion transport; plasma membrane; membrane; integral component of membrane; transport	protein_coding
WBGene00007336	C05C12.4	IV:11246447-11248052	N2	rnp-6	OK	34.8663	24.6603	-0.49964	-1.75202	0.00215	0.018108	yes	GO:0016021; GO:0016020	integral component of membrane; membrane	protein_coding
WBGene00001795	gtl-1	IV:11248901-11259465	N2	rnp-6	OK	14.0001	10.6164	-0.399146	-1.63634	0.00405	0.0298522	yes	GO:0016021; GO:0016020; GO:0030421	integral component of membrane; defecation; membrane	protein_coding
WBGene00010234	ttr-50	IV:11640144-11641015	N2	rnp-6	OK	163.417	112.991	-0.532356	-2.28257	0.00015	0.00195025	yes	GO:0005615	extracellular space	protein_coding
WBGene00006759	unc-22	IV:11970533-12011007	N2	rnp-6	OK	17.5599	30.9398	0.817179	1.22146	0.00065	0.0068644	yes	; GO:0018107; GO:0018105; GO:0016310; GO:0030017; GO:0045989; GO:0005737; GO:0031672; GO:0000166; GO:0004674; GO:0016740; GO:0004672; GO:0046872; GO:0005524; GO:0006468; GO:0016301; GO:0019901; GO:0008344; GO:0060298; GO:0040017; GO:0035095; GO:0051782; GO:0005516; GO:0005515	; cytoplasm; adult locomotory behavior; nucleotide binding; positive regulation of sarcomere organization; protein binding; protein kinase activity; kinase activity; calmodulin binding; ATP binding; metal ion binding; negative regulation of cell division; positive regulation of striated muscle contraction; sarcomere; protein kinase binding; protein phosphorylation; A band; transferase activity; b…	protein_coding
WBGene00195274	unc-22	IV:11970533-12011007	N2	rnp-6	OK	17.5599	30.9398	0.817179	1.22146	0.00065	0.0068644	yes
WBGene00000703	col-129	IV:12108670-12110258	N2	rnp-6	OK	25.6393	49.6249	0.952707	3.42776	5e-05	0.000725861	yes	GO:0005581; GO:0005515; GO:0042302	protein binding; structural constituent of cuticle; collagen trimer	protein_coding
WBGene00003772	nlr-1	IV:12170833-12178335	N2	rnp-6	OK	4.23172	2.77694	-0.607746	-1.83115	0.0018	0.0156835	yes	GO:0016021; GO:0016020; GO:0005509; GO:0005515	calcium ion binding; protein binding; integral component of membrane; membrane	protein_coding
WBGene00004756	sec-24.2	IV:12349945-12360792	N2	rnp-6	OK	14.4346	19.0607	0.401074	1.51971	0.0069	0.0450085	yes	GO:0006888; GO:0006886; GO:0006810; GO:0008270; GO:0015031; GO:0030127	ER to Golgi vesicle-mediated transport; COPII vesicle coat; zinc ion binding; protein transport; intracellular protein transport; transport	protein_coding
WBGene00011416	T04A11.1	IV:12475309-12477042	N2	rnp-6	OK	2.89912	4.72711	0.705343	1.58827	0.00665	0.0436819	yes	GO:0003824; GO:0009058	catalytic activity; biosynthetic process	protein_coding
WBGene00003995	pgp-1	IV:12591695-12599169	N2	rnp-6	OK	15.7922	9.23064	-0.774709	-2.95597	5e-05	0.000725861	yes	GO:0045087; GO:0016787; GO:0042626; GO:0006810; GO:0010038; GO:0016324; GO:0016021; GO:0016020; GO:0093002; GO:0006855; GO:0000166; GO:0042908; GO:0008559; GO:0016887; GO:0050829; GO:0055085; GO:0005524; GO:0015562	innate immune response; ATPase activity; response to nematicide; hydrolase activity; drug transmembrane transport; apical plasma membrane; defense response to Gram-negative bacterium; transmembrane transport; efflux transmembrane transporter activity; xenobiotic transmembrane transporting ATPase activity; ATP binding; ATPase activity, coupled to transmembrane movement of substances; membrane; xen…	protein_coding
WBGene00007779	C27D8.3	IV:12704108-12711744	N2	rnp-6	OK	15.4343	6.50349	-1.24686	-3.06491	5e-05	0.000725861	yes			protein_coding
WBGene00014135	ZK896.4	IV:12880666-12883146	N2	rnp-6	OK	2.89067	1.73114	-0.739684	-1.63486	0.00555	0.0380172	yes			protein_coding
WBGene00010660	K08D8.6	IV:12887059-12890508	N2	rnp-6	OK	107.746	73.5165	-0.551497	-2.43299	5e-05	0.000725861	yes	; GO:0045121	; membrane raft	protein_coding
WBGene00010657	K08D8.3	IV:12903974-12906624	N2	rnp-6	OK	2.01583	6.83616	1.76181	4.62879	5e-05	0.000725861	yes			protein_coding
WBGene00010658	K08D8.4	IV:12907468-12909998	N2	rnp-6	OK	10.3767	15.665	0.594204	1.97974	0.00065	0.0068644	yes	; GO:0045087	; innate immune response	protein_coding
WBGene00010659	K08D8.5	IV:12910644-12912136	N2	rnp-6	OK	15.939	8.77574	-0.860968	-2.56318	5e-05	0.000725861	yes	GO:0045087	innate immune response	protein_coding
WBGene00007864	C32H11.1	IV:12912789-12914969	N2	rnp-6	OK	13.9725	5.4206	-1.36606	-3.8507	5e-05	0.000725861	yes			protein_coding
WBGene00007875	dod-24	IV:12940141-12941368	N2	rnp-6	OK	10.5803	6.78452	-0.641058	-1.81979	0.00205	0.0174119	yes	GO:0050829; GO:0045087	innate immune response; defense response to Gram-negative bacterium	protein_coding
WBGene00010123	F55G11.2	IV:12967447-12969289	N2	rnp-6	OK	3.59041	1.40536	-1.35321	-2.68837	5e-05	0.000725861	yes	GO:0045087	innate immune response	protein_coding
WBGene00010749	K10D11.5	IV:12989684-12991804	N2	rnp-6	OK	5.72374	9.56887	0.741391	2.21883	0.0003	0.00356315	yes	GO:0016021; GO:0016020	integral component of membrane; membrane	protein_coding
WBGene00008177	C48D1.1	IV:13193666-13197382	N2	rnp-6	OK	5.0053	2.40198	-1.05923	-2.81861	5e-05	0.000725861	yes	; GO:0016567; GO:0051438; GO:0005515; GO:0031462; GO:0004842; GO:0005488	; protein binding; binding; regulation of ubiquitin-protein transferase activity; ubiquitin-protein transferase activity; protein ubiquitination; Cul2-RING ubiquitin ligase complex	protein_coding
WBGene00010714	mam-3	IV:13434241-13445309	N2	rnp-6	OK	0.72294	0.255702	-1.49941	-2.35072	0.0002	0.00250605	yes	GO:0016020	membrane	protein_coding
WBGene00009943	F52G2.3	IV:13543398-13548230	N2	rnp-6	OK	2.76411	4.16218	0.590522	1.60552	0.00555	0.0380172	yes			protein_coding
WBGene00007458	C08F11.11	IV:13646734-13647658	N2	rnp-6	OK	1119.25	849.37	-0.398064	-1.83519	0.0017	0.0149637	yes	GO:0005576	extracellular region	protein_coding
WBGene00007459	C08F11.12	IV:13650659-13651511	N2	rnp-6	OK	182.156	103.177	-0.82005	-3.02887	5e-05	0.000725861	yes	GO:0005576	extracellular region	protein_coding
WBGene00012540	Y37A1B.7	IV:14042592-14043780	N2	rnp-6	OK	3.08495	1.28444	-1.26411	-1.99091	0.00195	0.0167396	yes			protein_coding
WBGene00000707	col-133	IV:14098334-14099352	N2	rnp-6	OK	1.0944	2.83658	1.37402	2.3236	0.00025	0.00303907	yes	GO:0016021; GO:0016020; GO:0005581; GO:0042302	structural constituent of cuticle; collagen trimer; integral component of membrane; membrane	protein_coding
WBGene00013334	Y57G11C.45	IV:14783416-14784231	N2	rnp-6	OK	8.55702	2.35051	-1.86414	-2.9877	5e-05	0.000725861	yes	GO:0007218	neuropeptide signaling pathway	protein_coding
WBGene00013311	sec-61	IV:14822531-14825178	N2	rnp-6	OK	163.302	212.759	0.381673	1.74321	0.00195	0.0167396	yes	GO:0015031; GO:0016021; GO:0016020; GO:0006810	protein transport; integral component of membrane; transport; membrane	protein_coding
WBGene00010953	clec-190	IV:15124932-15126121	N2	rnp-6	OK	13.0832	6.44945	-1.02047	-1.60438	0.0014	0.0128195	yes	GO:0030246	carbohydrate binding	protein_coding
WBGene00046645	clec-190	IV:15124932-15126121	N2	rnp-6	OK	13.0832	6.44945	-1.02047	-1.60438	0.0014	0.0128195	yes
WBGene00013647	Y105C5B.5	IV:15899923-15901225	N2	rnp-6	OK	474.158	341.536	-0.473329	-2.09992	0.00025	0.00303907	yes			protein_coding
WBGene00001604	gln-3	IV:16167782-16170826	N2	rnp-6	OK	11.214	18.592	0.729376	2.37261	0.0001	0.00135972	yes	GO:0004356; GO:0000166; GO:0003824; GO:0006807; GO:0006542; GO:0016874; GO:0005524	catalytic activity; nitrogen compound metabolic process; glutamate-ammonia ligase activity; glutamine biosynthetic process; ligase activity; ATP binding; nucleotide binding	protein_coding
WBGene00013100	zip-7	IV:16503322-16505682	N2	rnp-6	OK	11.9892	6.35628	-0.915481	-1.70003	0.0063	0.0419085	yes	GO:0043565; GO:0003700; GO:0005634; GO:0006355; GO:0001077; GO:0045944; GO:0000977; GO:0005515; GO:0006366; GO:0007275	transcription from RNA polymerase II promoter; regulation of transcription, DNA-templated; transcriptional activator activity, RNA polymerase II proximal promoter sequence-specific DNA binding; nucleus; DNA binding transcription factor activity; positive regulation of transcription from RNA polymerase II promoter; protein binding; multicellular organism development; RNA polymerase II regulatory r…	protein_coding
WBGene00013103	Y51H4A.7	IV:16535729-16542894	N2	rnp-6	OK	20.9372	14.945	-0.486404	-1.37948	0.00585	0.0395707	yes	GO:0016153; GO:0016829; GO:0019556; GO:0006547; GO:0019557	urocanate hydratase activity; histidine catabolic process to glutamate and formamide; histidine metabolic process; histidine catabolic process to glutamate and formate; lyase activity	protein_coding
WBGene00167413	Y51H4A.7	IV:16535729-16542894	N2	rnp-6	OK	20.9372	14.945	-0.486404	-1.37948	0.00585	0.0395707	yes
WBGene00013808	sfa-1	IV:17104215-17110982	N2	rnp-6	OK	57.2503	74.1669	0.373491	1.68594	0.00255	0.0206975	yes	GO:0000380; GO:0045131; GO:0000398; GO:0003723; GO:0003676; GO:0008270	nucleic acid binding; RNA binding; zinc ion binding; pre-mRNA branch point binding; mRNA splicing, via spliceosome; alternative mRNA splicing, via spliceosome	protein_coding
WBGene00004814	skr-8	IV:17165188-17165853	N2	rnp-6	OK	63.5563	46.8715	-0.439325	-1.57789	0.0061	0.040891	yes	GO:0006511; GO:0016874	ubiquitin-dependent protein catabolic process; ligase activity	protein_coding
WBGene00014000	ZK550.6	IV:17260303-17262485	N2	rnp-6	OK	102.069	60.1742	-0.762333	-3.17137	5e-05	0.000725861	yes	GO:0031418; GO:0006631; GO:0001561; GO:0051213; GO:0048244; GO:0046872; GO:0055114; GO:0016491	fatty acid metabolic process; oxidoreductase activity; fatty acid alpha-oxidation; metal ion binding; L-ascorbic acid binding; dioxygenase activity; phytanoyl-CoA dioxygenase activity; oxidation-reduction process	protein_coding
WBGene00001240	elo-2	IV:17466059-17467408	N2	rnp-6	OK	26.0276	47.3413	0.863055	3.15763	5e-05	0.000725861	yes	GO:0006633; GO:0030148; GO:0006631; GO:0006629; GO:0034625; GO:0102338; GO:0042761; GO:0016021; GO:0016020; GO:0102337; GO:0009922; GO:0016740; GO:0030176; GO:0035264; GO:0102336; GO:0008340; GO:0019367; GO:0034626; GO:0010468; GO:0000003	fatty acid elongase activity; multicellular organism growth; 3-oxo-lignoceronyl-CoA synthase activity; sphingolipid biosynthetic process; 3-oxo-cerotoyl-CoA synthase activity; reproduction; integral component of endoplasmic reticulum membrane; fatty acid elongation, polyunsaturated fatty acid; 3-oxo-arachidoyl-CoA synthase activity; transferase activity; fatty acid metabolic process; regulation o…	protein_coding
WBGene00044689	arid-1	V:186304-200686	N2	rnp-6	OK	30.9222	42.4866	0.458364	2.06001	0.00025	0.00303907	yes	; GO:0044212; GO:0017053; GO:0005634; GO:0006355; GO:0006357; GO:0003677	; transcription regulatory region DNA binding; regulation of transcription, DNA-templated; DNA binding; transcriptional repressor complex; nucleus; regulation of transcription from RNA polymerase II promoter	protein_coding
WBGene00022642	lipl-5	V:385736-388090	N2	rnp-6	OK	112.479	165.999	0.561514	2.51511	5e-05	0.000725861	yes	; GO:0016787; GO:0006629; GO:0016788; GO:0016042; GO:0050829	; hydrolase activity; hydrolase activity, acting on ester bonds; lipid metabolic process; lipid catabolic process; defense response to Gram-negative bacterium	protein_coding
WBGene00021448	Y39D8A.1	V:419686-421841	N2	rnp-6	OK	2.33292	5.13174	1.13731	2.85256	5e-05	0.000725861	yes	GO:0016021; GO:0016020	integral component of membrane; membrane	protein_coding
WBGene00015259	dod-20	V:422497-424064	N2	rnp-6	OK	0.185542	0.860643	2.21367	2.39805	0.0014	0.0128195	yes	GO:0045087; GO:0045121	innate immune response; membrane raft	protein_coding
WBGene00019743	nhr-203	V:459768-462075	N2	rnp-6	OK	2.28996	4.44534	0.95697	2.40807	0.00015	0.00195025	yes	GO:0043565; GO:0003700; GO:0005634; GO:0006355; GO:0008270; GO:0043401; GO:0003677; GO:0046872; GO:0006351	steroid hormone mediated signaling pathway; regulation of transcription, DNA-templated; DNA binding; zinc ion binding; nucleus; metal ion binding; sequence-specific DNA binding; transcription, DNA-templated; DNA binding transcription factor activity	protein_coding
WBGene00004144	pqn-60	V:504038-504616	N2	rnp-6	OK	1.17239	4.13921	1.8199	2.65964	0.0001	0.00135972	yes	GO:0005515	protein binding	protein_coding
WBGene00015759	C14C6.5	V:536627-537418	N2	rnp-6	OK	34.1805	57.9614	0.761917	2.49639	5e-05	0.000725861	yes	; GO:0045087	; innate immune response	protein_coding
WBGene00015756	C14C6.2	V:563134-564382	N2	rnp-6	OK	14.0564	28.6569	1.02766	2.50725	5e-05	0.000725861	yes			protein_coding
WBGene00019983	sti-1	V:773549-774854	N2	rnp-6	OK	116.537	147.29	0.337876	1.50891	0.00785	0.0494531	yes	GO:0005737; GO:0000003; GO:0042030; GO:0030544; GO:0032780; GO:0005515; GO:0009408; GO:0008340; GO:0051879; GO:0007275	Hsp70 protein binding; negative regulation of ATPase activity; cytoplasm; Hsp90 protein binding; response to heat; determination of adult lifespan; reproduction; protein binding; multicellular organism development; ATPase inhibitor activity	protein_coding
WBGene00044514	R09E12.9	V:777570-778235	N2	rnp-6	OK	45.8714	29.4306	-0.640279	-1.95033	0.0013	0.0120757	yes			protein_coding
WBGene00019971	ergo-1	V:1008802-1023094	N2	rnp-6	OK	64.2197	83.2655	0.374702	1.65775	0.0038	0.0283741	yes	GO:0005737; GO:0003676; GO:0030422; GO:0031047; GO:0005515; GO:0017151; GO:0006417; GO:0016246	nucleic acid binding; RNA interference; production of siRNA involved in RNA interference; cytoplasm; DEAD/H-box RNA helicase binding; regulation of translation; gene silencing by RNA; protein binding	protein_coding
WBGene00021743	Y50D4B.4	V:1092678-1098951	N2	rnp-6	OK	13.1502	8.63615	-0.606628	-2.13835	5e-05	0.000725861	yes	GO:0005737; GO:0016021; GO:0016020; GO:0006516	glycoprotein catabolic process; cytoplasm; integral component of membrane; membrane	protein_coding
WBGene00016540	C39F7.5	V:1264772-1270104	N2	rnp-6	OK	7.136	4.4213	-0.690644	-2.08736	0.0001	0.00135972	yes			protein_coding
WBGene00019979	R09B5.11	V:1439204-1441871	N2	rnp-6	OK	4.38863	7.25677	0.725557	2.08757	0.0003	0.00356315	yes	GO:0022891; GO:0006810; GO:0005215; GO:0016021; GO:0016020; GO:0022857; GO:0005886; GO:0055085	transporter activity; substrate-specific transmembrane transporter activity; integral component of membrane; transmembrane transporter activity; plasma membrane; membrane; transmembrane transport; transport	protein_coding
WBGene00019978	hacd-1	V:1460368-1461614	N2	rnp-6	OK	10.3315	65.6616	2.668	8.70016	5e-05	0.000725861	yes	GO:0006631; GO:0016021; GO:0016020; GO:0070403; GO:0003857; GO:0055114; GO:0016491	3-hydroxyacyl-CoA dehydrogenase activity; fatty acid metabolic process; oxidoreductase activity; NAD+ binding; oxidation-reduction process; membrane; integral component of membrane	protein_coding
WBGene00018706	F52F10.2	V:1548142-1550701	N2	rnp-6	OK	0.501245	0.128475	-1.96403	-2.15575	0.00375	0.0280629	yes	GO:0016021; GO:0016020; GO:0055085	transmembrane transport; integral component of membrane; membrane	protein_coding
WBGene00021603	clec-204	V:1757185-1760306	N2	rnp-6	OK	1.65735	0.77223	-1.10178	-2.14444	0.00085	0.00858204	yes	GO:0030246	carbohydrate binding	protein_coding
WBGene00002018	hsp-16.41	V:1805232-1805875	N2	rnp-6	OK	8.44032	2.74696	-1.61946	-3.16073	5e-05	0.000725861	yes	GO:0050829; GO:0009408; GO:0051082; GO:0030968	response to heat; endoplasmic reticulum unfolded protein response; unfolded protein binding; defense response to Gram-negative bacterium	protein_coding
WBGene00020393	T10B5.7	V:1846200-1848015	N2	rnp-6	OK	35.4232	21.9572	-0.689998	-2.41434	5e-05	0.000725861	yes	GO:0016787; GO:0006629	hydrolase activity; lipid metabolic process	protein_coding
WBGene00018099	ztf-28	V:2090139-2095282	N2	rnp-6	OK	11.7981	17.3757	0.558523	1.76776	0.00265	0.0213265	yes	GO:0003676	nucleic acid binding	protein_coding
WBGene00017720	F22F7.2	V:2122826-2127360	N2	rnp-6	OK	1.28938	0.514279	-1.32605	-2.17881	0.00025	0.00303907	yes	GO:0055114; GO:0016491	oxidation-reduction process; oxidoreductase activity	protein_coding
WBGene00018910	F56A4.2	V:2459636-2460893	N2	rnp-6	OK	3.37027	8.08034	1.26155	2.75014	5e-05	0.000725861	yes	GO:0045087; GO:0030246	innate immune response; carbohydrate binding	protein_coding
WBGene00001758	gst-10	V:2561689-2564708	N2	rnp-6	OK	5.90424	10.3254	0.806377	2.0595	0.0003	0.00356315	yes	GO:0004364; GO:0005515; GO:0042542; GO:0010286; GO:0005575; GO:0016740; GO:0006749; GO:0008340; GO:0010225; GO:0055114	glutathione metabolic process; response to UV-C; heat acclimation; transferase activity; glutathione transferase activity; cellular_component; response to hydrogen peroxide; oxidation-reduction process; protein binding; determination of adult lifespan	protein_coding
WBGene00018823	F54E2.1	V:2810426-2811985	N2	rnp-6	OK	63.6552	105.044	0.722637	3.07852	5e-05	0.000725861	yes	GO:0045087; GO:0045121	innate immune response; membrane raft	protein_coding
WBGene00020182	ugt-53	V:2849351-2852031	N2	rnp-6	OK	2.92077	1.26361	-1.2088	-2.62609	5e-05	0.000725861	yes	GO:0043231; GO:0016021; GO:0016020; GO:0016740; GO:0008152; GO:0016758; GO:0015020	transferase activity; membrane; integral component of membrane; metabolic process; glucuronosyltransferase activity; intracellular membrane-bounded organelle; transferase activity, transferring hexosyl groups	protein_coding
WBGene00002055	ifc-1	V:2881392-2883754	N2	rnp-6	OK	1.82087	4.24721	1.22189	2.95008	5e-05	0.000725861	yes	GO:0005737; GO:0005882; GO:0005198	cytoplasm; intermediate filament; structural molecule activity	protein_coding
WBGene00019105	asp-8	V:3024218-3027933	N2	rnp-6	OK	3.98135	8.9616	1.1705	3.29894	5e-05	0.000725861	yes	GO:0016787; GO:0008233; GO:0004190; GO:0030163; GO:0006508	hydrolase activity; peptidase activity; proteolysis; aspartic-type endopeptidase activity; protein catabolic process	protein_coding
WBGene00044526	T28A11.22	V:3257584-3258240	N2	rnp-6	OK	6.72347	3.70123	-0.861201	-1.66867	0.0063	0.0419085	yes	GO:0005515	protein binding	protein_coding
WBGene00015434	C04E12.4	V:3362783-3368321	N2	rnp-6	OK	2.41397	0.750024	-1.6864	-3.48213	5e-05	0.000725861	yes	GO:0005737; GO:0005829; GO:0005634; GO:0016020; GO:0006516; GO:0006517; GO:0000224; GO:0006515; GO:0016021	glycoprotein catabolic process; cytosol; cytoplasm; protein deglycosylation; protein quality control for misfolded or incompletely synthesized proteins; peptide-N4-(N-acetyl-beta-glucosaminyl)asparagine amidase activity; nucleus; membrane; integral component of membrane	protein_coding
WBGene00015574	irg-1	V:3523586-3524575	N2	rnp-6	OK	3.22752	7.21273	1.16012	2.46357	5e-05	0.000725861	yes	GO:0005575; GO:0045087; GO:0003674; GO:0019239; GO:0009451	innate immune response; RNA modification; cellular_component; deaminase activity; molecular_function	protein_coding
WBGene00044279	grl-32	V:3560270-3560508	N2	rnp-6	OK	0	1.41268	inf		0.00145	0.013173	yes
WBGene00020696	T22F3.3	V:3579046-3585045	N2	rnp-6	OK	248.183	313.039	0.33494	1.55268	0.0077	0.0487669	yes	GO:0005737; GO:0005975; GO:0005980; GO:0004645; GO:0016740; GO:0030170; GO:0016757; GO:0008184	transferase activity, transferring glycosyl groups; pyridoxal phosphate binding; transferase activity; carbohydrate metabolic process; glycogen catabolic process; glycogen phosphorylase activity; cytoplasm; phosphorylase activity	protein_coding
WBGene00019097	F59B1.2	V:3633340-3634685	N2	rnp-6	OK	380.61	292.024	-0.382225	-1.72354	0.0026	0.0210083	yes			protein_coding
WBGene00019963	R08E5.3	V:3772057-3776136	N2	rnp-6	OK	20.3653	10.469	-0.959994	-2.19247	0.00075	0.00772691	yes	GO:0005737; GO:0008757; GO:0032259	S-adenosylmethionine-dependent methyltransferase activity; cytoplasm; methylation	protein_coding
WBGene00019970	R08F11.7	V:3790132-3793766	N2	rnp-6	OK	0.0846131	1.10469	3.70661	4.36023	5e-05	0.000725861	yes	GO:0005615; GO:0020037; GO:0006979; GO:0098869; GO:0050830; GO:0004601; GO:0055114	extracellular space; cellular oxidant detoxification; oxidation-reduction process; heme binding; defense response to Gram-positive bacterium; response to oxidative stress; peroxidase activity	protein_coding
WBGene00015897	nhr-156	V:3906140-3906947	N2	rnp-6	OK	1.38638	3.46531	1.32166	2.21071	0.0002	0.00250605	yes	GO:0043565; GO:0003700; GO:0005634; GO:0006355; GO:0008270; GO:0043401; GO:0003677; GO:0046872; GO:0006351	steroid hormone mediated signaling pathway; regulation of transcription, DNA-templated; DNA binding; zinc ion binding; nucleus; metal ion binding; sequence-specific DNA binding; transcription, DNA-templated; DNA binding transcription factor activity	protein_coding
WBGene00020606	nhr-284	V:3907792-3908381	N2	rnp-6	OK	1.24902	4.29977	1.78346	2.56206	0.0002	0.00250605	yes
WBGene00019472	cyp-35B1	V:3939126-3941235	N2	rnp-6	OK	1.58899	2.93933	0.887383	2.0802	0.00035	0.00407043	yes	GO:0004497; GO:0008395; GO:0020037; GO:0016705; GO:0005506; GO:0046872; GO:0055114; GO:0016491	oxidoreductase activity; iron ion binding; oxidoreductase activity, acting on paired donors, with incorporation or reduction of molecular oxygen; steroid hydroxylase activity; metal ion binding; heme binding; monooxygenase activity; oxidation-reduction process	protein_coding
WBGene00019470	cyp-35B3	V:3945352-3947044	N2	rnp-6	OK	0.264438	0.772133	1.54592	2.07079	0.00125	0.0117015	yes	GO:0004497; GO:0008395; GO:0020037; GO:0016705; GO:0005506; GO:0046872; GO:0055114; GO:0016491	oxidoreductase activity; iron ion binding; oxidoreductase activity, acting on paired donors, with incorporation or reduction of molecular oxygen; steroid hydroxylase activity; metal ion binding; heme binding; monooxygenase activity; oxidation-reduction process	protein_coding
WBGene00020386	cyp-34A4	V:3950026-3952068	N2	rnp-6	OK	9.45769	14.8253	0.648503	2.16568	0.0004	0.00457121	yes	GO:0004497; GO:0008395; GO:0020037; GO:0016705; GO:0005506; GO:0046872; GO:0055114; GO:0016491	oxidoreductase activity; iron ion binding; oxidoreductase activity, acting on paired donors, with incorporation or reduction of molecular oxygen; steroid hydroxylase activity; metal ion binding; heme binding; monooxygenase activity; oxidation-reduction process	protein_coding
WBGene00003766	nlp-28	V:3987899-3988314	N2	rnp-6	OK	132.272	81.4324	-0.69983	-2.30409	5e-05	0.000725861	yes	GO:0007218; GO:0005576	extracellular region; neuropeptide signaling pathway	protein_coding
WBGene00016786	cyp-35A4	V:4031626-4033387	N2	rnp-6	OK	17.3269	30.0023	0.792061	2.90644	5e-05	0.000725861	yes	GO:0004497; GO:0008395; GO:0020037; GO:0016705; GO:0009410; GO:0005506; GO:0046872; GO:0055114; GO:0016491	response to xenobiotic stimulus; oxidoreductase activity; iron ion binding; oxidoreductase activity, acting on paired donors, with incorporation or reduction of molecular oxygen; steroid hydroxylase activity; metal ion binding; heme binding; monooxygenase activity; oxidation-reduction process	protein_coding
WBGene00016785	C49G7.7	V:4034475-4038054	N2	rnp-6	OK	1.49264	3.05882	1.03511	2.42269	0.0001	0.00135972	yes			protein_coding
WBGene00016783	irg-2	V:4042403-4043600	N2	rnp-6	OK	6.44954	15.5146	1.26636	3.51249	5e-05	0.000725861	yes	GO:0045087	innate immune response	protein_coding
WBGene00016782	phat-3	V:4043915-4045001	N2	rnp-6	OK	6.25181	10.6216	0.764651	2.08612	0.0002	0.00250605	yes			protein_coding
WBGene00016781	C49G7.3	V:4046404-4047436	N2	rnp-6	OK	37.0712	59.6658	0.686605	2.57067	5e-05	0.000725861	yes			protein_coding
WBGene00020237	phat-4	V:4129905-4130908	N2	rnp-6	OK	1.68797	5.60966	1.73263	3.53308	5e-05	0.000725861	yes			protein_coding
WBGene00021557	Y45G5AM.5	V:4160385-4160889	N2	rnp-6	OK	17.6203	8.04745	-1.13064	-2.67063	5e-05	0.000725861	yes			protein_coding
WBGene00017060	D2063.1	V:4327129-4328826	N2	rnp-6	OK	37.5539	71.3969	0.926899	3.68087	5e-05	0.000725861	yes	GO:0005737; GO:0004022; GO:0006116; GO:0006067; GO:0055120; GO:0008270; GO:0005515; GO:0046872; GO:0055114; GO:0016491	ethanol metabolic process; NADH oxidation; cytoplasm; striated muscle dense body; oxidoreductase activity; zinc ion binding; metal ion binding; protein binding; alcohol dehydrogenase (NAD) activity; oxidation-reduction process	protein_coding
WBGene00018811	pmt-2	V:4628579-4635266	N2	rnp-6	OK	189.344	256.987	0.440688	2.00652	0.00055	0.00597832	yes	GO:0032259; GO:0080101; GO:0016740; GO:0006656; GO:0008152; GO:0008168; GO:0000773	phosphatidyl-N-methylethanolamine N-methyltransferase activity; methylation; transferase activity; phosphatidylcholine biosynthetic process; metabolic process; methyltransferase activity; phosphatidyl-N-dimethylethanolamine N-methyltransferase activity	protein_coding
WBGene00018210	F39G3.5	V:4722619-4724565	N2	rnp-6	OK	10.3711	6.4607	-0.68281	-1.81156	0.0022	0.0184426	yes	GO:0016021; GO:0016020; GO:0045087; GO:0055114; GO:0016491	innate immune response; oxidation-reduction process; integral component of membrane; oxidoreductase activity; membrane	protein_coding
WBGene00044537	B0238.15	V:5240188-5240451	N2	rnp-6	OK	7.20297	19.8722	1.46409	2.52123	5e-05	0.000725861	yes	GO:0016021; GO:0016020	integral component of membrane; membrane	protein_coding
WBGene00015076	B0238.12	V:5267821-5268823	N2	rnp-6	OK	1.87199	3.51344	0.908313	1.63307	0.0057	0.0388114	yes			protein_coding
WBGene00015683	C10G8.4	V:5311934-5312316	N2	rnp-6	OK	529.505	399.308	-0.407142	-1.71216	0.00265	0.0213265	yes			protein_coding
WBGene00016428	dmsr-7	V:5405357-5408354	N2	rnp-6	OK	1.57646	0.841187	-0.906185	-1.68814	0.00525	0.0364418	yes	GO:0008528; GO:0016021; GO:0016020; GO:0007186; GO:0004930	G-protein coupled receptor signaling pathway; G-protein coupled peptide receptor activity; G-protein coupled receptor activity; integral component of membrane; membrane	protein_coding
WBGene00015767	hex-2	V:5654448-5658687	N2	rnp-6	OK	20.2911	13.4134	-0.59717	-2.1774	5e-05	0.000725861	yes	GO:0005975; GO:0015929; GO:0004553	hexosaminidase activity; carbohydrate metabolic process; hydrolase activity, hydrolyzing O-glycosyl compounds	protein_coding
WBGene00200664	F25B4.16	V:5704988-5705277	N2	rnp-6	OK	0	1.27612	inf		0.0023	0.0191136	yes
WBGene00019599	K09H11.1	V:5747818-5752033	N2	rnp-6	OK	20.1472	15.2329	-0.403391	-1.61342	0.0055	0.0377698	yes	GO:0016787; GO:0050660; GO:0033539; GO:0016627; GO:0005739; GO:0008152; GO:0003995; GO:0055114	oxidoreductase activity, acting on the CH-CH group of donors; fatty acid beta-oxidation using acyl-CoA dehydrogenase; hydrolase activity; flavin adenine dinucleotide binding; metabolic process; oxidation-reduction process; mitochondrion; acyl-CoA dehydrogenase activity	protein_coding
WBGene00019763	galt-1	V:5930915-5933429	N2	rnp-6	OK	1.13777	0.467362	-1.2836	-1.96896	0.0023	0.0191136	yes	GO:0005794; GO:0042125; GO:0035250; GO:0006491; GO:0016021; GO:0016020; GO:0043229; GO:0016740; GO:0016757; GO:0003831; GO:0032580; GO:0046872	transferase activity, transferring glycosyl groups; beta-N-acetylglucosaminylglycopeptide beta-1,4-galactosyltransferase activity; protein galactosylation; Golgi apparatus; Golgi cisterna membrane; transferase activity; UDP-galactosyltransferase activity; N-glycan processing; intracellular organelle; metal ion binding; membrane; integral component of membrane	protein_coding
WBGene00017535	atf-8	V:6105347-6107531	N2	rnp-6	OK	2.26479	0.904755	-1.32378	-2.1157	0.0011	0.0105816	yes	GO:0043565; GO:0003700; GO:0005634; GO:0006355; GO:0001077; GO:0045944; GO:0000977; GO:0006366; GO:0007275	transcription from RNA polymerase II promoter; regulation of transcription, DNA-templated; transcriptional activator activity, RNA polymerase II proximal promoter sequence-specific DNA binding; nucleus; DNA binding transcription factor activity; positive regulation of transcription from RNA polymerase II promoter; multicellular organism development; RNA polymerase II regulatory region sequence-sp…	protein_coding
WBGene00020891	T28C12.4	V:6316931-6326390	N2	rnp-6	OK	16.6294	12.0569	-0.46387	-1.69477	0.00285	0.0225677	yes	GO:0005575; GO:0016787; GO:0008150; GO:0052689	hydrolase activity; carboxylic ester hydrolase activity; cellular_component; biological_process	protein_coding
WBGene00018488	acs-1	V:6524988-6533075	N2	rnp-6	OK	17.1113	26.5583	0.634211	1.93331	0.00015	0.00195025	yes	GO:0003824; GO:0045197; GO:0008152	metabolic process; catalytic activity; establishment or maintenance of epithelial cell apical/basal polarity	protein_coding
WBGene00170992	acs-1	V:6524988-6533075	N2	rnp-6	OK	17.1113	26.5583	0.634211	1.93331	0.00015	0.00195025	yes
WBGene00019376	lipl-4	V:6550072-6551817	N2	rnp-6	OK	0.536161	1.58576	1.56444	2.2794	0.00015	0.00195025	yes	GO:0005737; GO:0016787; GO:0016239; GO:0004806; GO:0006629; ; GO:0019433; GO:0016788; GO:0016042; GO:0010508; GO:0008340	; triglyceride lipase activity; hydrolase activity; cytoplasm; positive regulation of autophagy; hydrolase activity, acting on ester bonds; triglyceride catabolic process; determination of adult lifespan; lipid metabolic process; lipid catabolic process; positive regulation of macroautophagy	protein_coding
WBGene00019652	K11G9.1	V:6676798-6679072	N2	rnp-6	OK	2.06487	4.85195	1.23251	3.16767	5e-05	0.000725861	yes	GO:0016787; GO:0052689	hydrolase activity; carboxylic ester hydrolase activity	protein_coding
WBGene00000715	col-142	V:6831162-6832254	N2	rnp-6	OK	23.6612	51.2478	1.11497	4.00591	5e-05	0.000725861	yes	GO:0016021; GO:0016020; GO:0005581; GO:0042302	structural constituent of cuticle; collagen trimer; integral component of membrane; membrane	protein_coding
WBGene00000716	col-143	V:6835634-6836700	N2	rnp-6	OK	232.394	315.269	0.440012	1.97423	0.0008	0.00816818	yes	GO:0016021; GO:0016020; GO:0005581; GO:0042302	structural constituent of cuticle; collagen trimer; integral component of membrane; membrane	protein_coding
WBGene00017329	ugt-39	V:7157141-7159188	N2	rnp-6	OK	4.38955	8.7955	1.00269	2.98503	5e-05	0.000725861	yes	GO:0043231; GO:0016021; GO:0016020; GO:0016740; GO:0008152; GO:0016758; GO:0015020	transferase activity; membrane; integral component of membrane; metabolic process; glucuronosyltransferase activity; intracellular membrane-bounded organelle; transferase activity, transferring hexosyl groups	protein_coding
WBGene00001428	fkb-3	V:7225368-7226314	N2	rnp-6	OK	25.4155	13.2591	-0.938725	-2.89737	5e-05	0.000725861	yes	GO:0005737; GO:0000413; GO:0006457; GO:0016853; GO:0005528; GO:0003755; GO:0061077	peptidyl-prolyl cis-trans isomerase activity; protein peptidyl-prolyl isomerization; cytoplasm; protein folding; isomerase activity; chaperone-mediated protein folding; FK506 binding	protein_coding
WBGene00017364	clec-7	V:7328396-7330001	N2	rnp-6	OK	5.96283	8.61244	0.530425	1.54633	0.00705	0.0457217	yes	GO:0050830; GO:0030246	defense response to Gram-positive bacterium; carbohydrate binding	protein_coding
WBGene00017362	F10G2.1	V:7332561-7333428	N2	rnp-6	OK	42.0275	30.0971	-0.481706	-1.64749	0.00445	0.0321073	yes	GO:0016021; GO:0016020	integral component of membrane; membrane	protein_coding
WBGene00020054	R13D7.2	V:7409898-7411253	N2	rnp-6	OK	3.95147	2.33057	-0.761707	-1.71032	0.0031	0.0241392	yes			protein_coding
WBGene00017567	F18E3.11	V:7413436-7413840	N2	rnp-6	OK	5.49568	11.6557	1.08467	2.15249	0.00035	0.00407043	yes			protein_coding
WBGene00045275	F18E3.12	V:7414940-7415344	N2	rnp-6	OK	1.12342	7.44901	2.72915	3.54	5e-05	0.000725861	yes			protein_coding
WBGene00045276	F18E3.13	V:7416115-7416819	N2	rnp-6	OK	4.05961	8.42427	1.05321	2.13258	0.0002	0.00250605	yes			protein_coding
WBGene00015705	nhr-152	V:7686381-7688159	N2	rnp-6	OK	2.07993	0.516404	-2.00996	-3.2699	5e-05	0.000725861	yes	GO:0043565; GO:0003700; GO:0005634; GO:0006355; GO:0008270; GO:0043401; GO:0003677; GO:0046872; GO:0006351	steroid hormone mediated signaling pathway; regulation of transcription, DNA-templated; DNA binding; zinc ion binding; nucleus; metal ion binding; sequence-specific DNA binding; transcription, DNA-templated; DNA binding transcription factor activity	protein_coding
WBGene00016147	cyp-32A1	V:7781810-7784591	N2	rnp-6	OK	9.91066	14.4311	0.542127	1.82528	0.0012	0.0113201	yes	GO:0004497; GO:0020037; GO:0016705; GO:0005506; GO:0046872; GO:0055114; GO:0016491	oxidoreductase activity; iron ion binding; oxidoreductase activity, acting on paired donors, with incorporation or reduction of molecular oxygen; metal ion binding; heme binding; monooxygenase activity; oxidation-reduction process	protein_coding
WBGene00003242	mig-6	V:7827231-7842384	N2	rnp-6	OK	27.7132	39.0048	0.493078	2.15114	0.0004	0.00457121	yes	; GO:0048598; GO:0005604; GO:0004222; GO:0010466; GO:0032504; GO:0002119; GO:0031012; GO:0010951; GO:0030414; GO:0005576; GO:0009792; GO:0008270; GO:0005515; GO:0004867; GO:0007275; GO:0006508; GO:0008233; GO:0005578; GO:0008237; GO:0000902	; embryonic morphogenesis; nematode larval development; embryo development ending in birth or egg hatching; extracellular matrix; extracellular region; protein binding; proteolysis; metalloendopeptidase activity; zinc ion binding; basement membrane; peptidase activity; multicellular organism development; negative regulation of peptidase activity; multicellular organism reproduction; metallopeptid…	protein_coding
WBGene00017678	asp-12	V:8269253-8272058	N2	rnp-6	OK	425.276	113.524	-1.9054	-8.31586	5e-05	0.000725861	yes	GO:0016787; GO:0045087; GO:0004190; GO:0030163; GO:0006508; GO:0008233	innate immune response; aspartic-type endopeptidase activity; hydrolase activity; peptidase activity; protein catabolic process; proteolysis	protein_coding
WBGene00000218	asp-5	V:8272374-8274047	N2	rnp-6	OK	1263.02	859.661	-0.555039	-2.5224	5e-05	0.000725861	yes	GO:0016787; GO:0008233; GO:0004190; GO:0030163; GO:0006508	hydrolase activity; peptidase activity; proteolysis; aspartic-type endopeptidase activity; protein catabolic process	protein_coding
WBGene00015592	C08D8.1	V:8345758-8349909	N2	rnp-6	OK	2.54478	1.20525	-1.07821	-2.10031	0.0012	0.0113201	yes	GO:0016021; GO:0016020	integral component of membrane; membrane	protein_coding
WBGene00001881	his-7	V:8533378-8533762	N2	rnp-6	OK	222.914	154.387	-0.529929	-2.02383	0.0003	0.00356315	yes	GO:0006281; GO:0006342; GO:0005634; GO:0000786; GO:0006355; GO:0000790; GO:0003677; GO:0046982; GO:0005694	nuclear chromatin; nucleosome; regulation of transcription, DNA-templated; DNA binding; chromatin silencing; protein heterodimerization activity; nucleus; DNA repair; chromosome	protein_coding
WBGene00001694	grd-5	V:8619031-8619869	N2	rnp-6	OK	72.5378	43.009	-0.754094	-2.54477	5e-05	0.000725861	yes	GO:0009792; GO:0007154; GO:0005102; GO:0005576	extracellular region; cell communication; embryo development ending in birth or egg hatching; receptor binding	protein_coding
WBGene00000541	cln-3.3	V:8682964-8686162	N2	rnp-6	OK	6.24295	3.32259	-0.90992	-2.3831	0.0001	0.00135972	yes	GO:0007034; GO:0016021; GO:0016020; GO:0005764; GO:0005765; GO:0003674; GO:0007040; GO:0051453; GO:0008340; GO:0015809; GO:0046662	regulation of oviposition; molecular_function; integral component of membrane; lysosome organization; lysosomal membrane; determination of adult lifespan; membrane; lysosome; vacuolar transport; arginine transport; regulation of intracellular pH	protein_coding
WBGene00001923	his-49	V:8847942-8848353	N2	rnp-6	OK	24.9186	9.8735	-1.33559	-3.08579	5e-05	0.000725861	yes	GO:0005634; GO:0003677; GO:0031492; GO:0000786; GO:0046982; GO:0005694; GO:0006334	nucleosome; DNA binding; protein heterodimerization activity; nucleosome assembly; nucleus; nucleosomal DNA binding; chromosome	protein_coding
WBGene00001926	his-52	V:8850463-8850835	N2	rnp-6	OK	18.351	0.448635	-5.35417	-6.05756	0.0044	0.0318201	yes	GO:0000786; GO:0005634; GO:0005811; GO:0035267; GO:0003677; GO:0046982; GO:0005694; GO:0006334	nucleosome; DNA binding; lipid droplet; NuA4 histone acetyltransferase complex; protein heterodimerization activity; nucleosome assembly; nucleus; chromosome	protein_coding
WBGene00019203	ttr-47	V:8923087-8928938	N2	rnp-6	OK	127.195	91.1277	-0.481086	-1.70133	0.00325	0.0250162	yes	GO:0005615	extracellular space	protein_coding
WBGene00016095	C25E10.5	V:9030547-9032598	N2	rnp-6	OK	3.87872	6.69969	0.788515	2.22105	0.0003	0.00356315	yes	GO:0016021; GO:0016020	integral component of membrane; membrane	protein_coding
WBGene00017657	F21C10.7	V:9112789-9122180	N2	rnp-6	OK	5.75903	7.70448	0.419871	1.66712	0.0041	0.0300971	yes	GO:0005515	protein binding	protein_coding
WBGene00010593	gsnl-1	V:9497050-9499378	N2	rnp-6	OK	16.0826	22.4474	0.481041	1.7311	0.0029	0.0228734	yes	GO:0005856; GO:0005737; GO:0030042; GO:0015629; GO:1905808; GO:0045010; GO:0051016; GO:0051015; GO:0051014; GO:0003779; GO:0055120; GO:0005509; GO:0051693; GO:0005546; GO:0003785	calcium ion binding; actin filament binding; actin filament capping; barbed-end actin filament capping; actin nucleation; actin binding; cytoplasm; striated muscle dense body; actin filament severing; actin monomer binding; phosphatidylinositol-4,5-bisphosphate binding; positive regulation of synapse disassembly; cytoskeleton; actin cytoskeleton; actin filament depolymerization	protein_coding
WBGene00008229	C50F4.1	V:9526732-9529250	N2	rnp-6	OK	86.4945	59.138	-0.548522	-2.32609	5e-05	0.000725861	yes			protein_coding
WBGene00235328	T06E4.21	V:9651593-9652151	N2	rnp-6	OK	0	1.7753	inf		0.0005	0.00551085	yes	GO:0016021; GO:0016020	integral component of membrane; membrane	protein_coding
WBGene00000172	aqp-4,marc-1	V:9737591-9740870	N2	rnp-6	OK	16.3061	8.49818	-0.940186	-2.74037	5e-05	0.000725861	yes	GO:0006810; GO:0015250; GO:0016324; GO:0005215; GO:0016021; GO:0016020; GO:0034220; GO:0006833; GO:0005887; GO:0005886	transporter activity; ion transmembrane transport; integral component of plasma membrane; apical plasma membrane; water transport; plasma membrane; membrane; integral component of membrane; transport; water channel activity	protein_coding
WBGene00077696	aqp-4,marc-1	V:9737591-9740870	N2	rnp-6	OK	16.3061	8.49818	-0.940186	-2.74037	5e-05	0.000725861	yes	GO:0016021; GO:0016020; GO:0008270; GO:0046872; GO:0004842; GO:0000209	zinc ion binding; ubiquitin-protein transferase activity; metal ion binding; membrane; integral component of membrane; protein polyubiquitination	protein_coding
WBGene00011004	R04B5.6	V:10085280-10087313	N2	rnp-6	OK	0.675205	0.26494	-1.34966	-1.67186	0.0079	0.0496976	yes	GO:0046872; GO:0008270; GO:0055114; GO:0016491	zinc ion binding; metal ion binding; oxidoreductase activity; oxidation-reduction process	protein_coding
WBGene00008254	C51E3.9	V:10145951-10148978	N2	rnp-6	OK	7.20609	4.06516	-0.825903	-1.96739	0.0013	0.0120757	yes	GO:0005737; GO:0008757; GO:0032259;	S-adenosylmethionine-dependent methyltransferase activity; cytoplasm; ; methylation	protein_coding
WBGene00007097	B0024.4	V:10297398-10298982	N2	rnp-6	OK	1.31777	3.02274	1.19776	2.50427	5e-05	0.000725861	yes	GO:0045087; GO:0045121	innate immune response; membrane raft	protein_coding
WBGene00007071	AC3.5	V:10388469-10393503	N2	rnp-6	OK	14.7448	10.8665	-0.440321	-1.70816	0.00235	0.0194563	yes	GO:0005737; GO:0042277; GO:0016021; GO:0016020; GO:0043171; GO:0008270; GO:0070006; GO:0006508; GO:0008237	peptide binding; metalloaminopeptidase activity; cytoplasm; zinc ion binding; peptide catabolic process; membrane; metallopeptidase activity; proteolysis; integral component of membrane	protein_coding
WBGene00007950	C35A5.6	V:10509055-10510480	N2	rnp-6	OK	14.0751	8.59205	-0.712072	-1.87227	0.00075	0.00772691	yes	; GO:0005576	extracellular region;	protein_coding
WBGene00007953	hda-11	V:10526188-10528396	N2	rnp-6	OK	0.807861	0.264317	-1.61184	-1.86216	0.00615	0.0411542	yes	GO:0016787; GO:0033558; GO:0006476	hydrolase activity; protein deacetylase activity; protein deacetylation	protein_coding
WBGene00011893	T21C9.6	V:10581886-10587118	N2	rnp-6	OK	9.63752	4.57718	-1.0742	-3.75469	5e-05	0.000725861	yes	GO:0016310; GO:0016772; GO:0016301; GO:0005524; GO:0003824	kinase activity; transferase activity, transferring phosphorus-containing groups; ATP binding; phosphorylation; catalytic activity	protein_coding
WBGene00009241	F28H7.8	V:10758959-10762790	N2	rnp-6	OK	3.51602	5.62464	0.677816	1.76103	0.0019	0.0163938	yes			protein_coding
WBGene00008375	D1054.8	V:10784272-10785369	N2	rnp-6	OK	15.6539	22.6211	0.531152	1.70279	0.00325	0.0250162	yes	GO:0055114; GO:0016491	oxidation-reduction process; oxidoreductase activity	protein_coding
WBGene00008913	F17C11.1	V:10941449-10942889	N2	rnp-6	OK	11.2903	17.9338	0.667602	1.90983	0.00085	0.00858204	yes
WBGene00000063	act-1	V:11079166-11082497	N2	rnp-6	OK	72.9478	105.821	0.536684	2.33669	0.0001	0.00135972	yes	GO:0005856; GO:0005737; GO:0030866; GO:0000166; GO:0009792; GO:0000281; GO:0005865; GO:0005524	embryo development ending in birth or egg hatching; cortical actin cytoskeleton organization; cytoplasm; striated muscle thin filament; mitotic cytokinesis; ATP binding; cytoskeleton; nucleotide binding	protein_coding
WBGene00012152	cnc-10	V:11183238-11183639	N2	rnp-6	OK	28.431	17.5012	-0.700008	-1.71386	0.0041	0.0300971	yes			protein_coding
WBGene00011831	T19B10.2	V:11221301-11226011	N2	rnp-6	OK	108.872	142.905	0.392431	1.62521	0.0048	0.0339756	yes			protein_coding
WBGene00003248	mig-17	V:11446651-11450357	N2	rnp-6	OK	4.5952	2.49501	-0.88108	-2.19277	0.0004	0.00457121	yes	GO:0016787; GO:0005604; GO:0004222; GO:0005615; GO:0016540; GO:0031638; GO:0030334; GO:0007275; GO:0035262; GO:0005576; GO:0006508; GO:0008233; GO:0046872; GO:0005578; GO:0008237; GO:1903354	regulation of distal tip cell migration; extracellular space; regulation of cell migration; extracellular region; zymogen activation; metalloendopeptidase activity; peptidase activity; basement membrane; hydrolase activity; multicellular organism development; metal ion binding; protein autoprocessing; metallopeptidase activity; proteolysis; proteinaceous extracellular matrix; gonad morphogenesis	protein_coding
WBGene00010286	F58H1.3	V:11933880-11935055	N2	rnp-6	OK	63.2752	43.8346	-0.529571	-2.0202	0.0004	0.00457121	yes	GO:0005737; GO:0016787; GO:0009086; GO:0019509; GO:0008652; GO:0016311; GO:0005634; GO:0000287; GO:0008152; GO:0046872; GO:0043874	L-methionine salvage from methylthioadenosine; cellular amino acid biosynthetic process; magnesium ion binding; hydrolase activity; cytoplasm; acireductone synthase activity; methionine biosynthetic process; metabolic process; nucleus; metal ion binding; dephosphorylation	protein_coding
WBGene00000781	cpr-1	V:11975514-11976759	N2	rnp-6	OK	754.388	1040.97	0.464552	2.1274	0.0002	0.00250605	yes	GO:0016787; GO:0005615; GO:0051603; GO:0005764; GO:0004197; GO:0006508; GO:0008233; GO:0008234	extracellular space; lysosome; hydrolase activity; peptidase activity; cysteine-type endopeptidase activity; proteolysis involved in cellular protein catabolic process; proteolysis; cysteine-type peptidase activity	protein_coding
WBGene00007758	C27A7.8	V:12153075-12154654	N2	rnp-6	OK	13.9733	6.87233	-1.0238	-2.36611	0.0001	0.00135972	yes			protein_coding
WBGene00011452	ugt-55	V:12255621-12258793	N2	rnp-6	OK	0.874209	0.343907	-1.34596	-2.16966	0.0008	0.00816818	yes	GO:0008152; GO:0016021; GO:0016020; GO:0016740; GO:0016757; GO:0016758; GO:0015020; GO:0043231	transferase activity, transferring glycosyl groups; transferase activity; membrane; transferase activity, transferring hexosyl groups; metabolic process; glucuronosyltransferase activity; intracellular membrane-bounded organelle; integral component of membrane	protein_coding
WBGene00006539	tbb-6	V:12261803-12263845	N2	rnp-6	OK	1.1757	3.04777	1.37424	2.76871	5e-05	0.000725861	yes	GO:0007017; GO:0007010; GO:0003924; GO:0000166; GO:0005200; GO:0005874; GO:0005525	structural constituent of cytoskeleton; microtubule-based process; microtubule; GTPase activity; GTP binding; cytoskeleton organization; nucleotide binding	protein_coding
WBGene00005018	sqt-3	V:12352993-12354314	N2	rnp-6	OK	88.1605	57.2047	-0.624	-2.35177	5e-05	0.000725861	yes	GO:0040002; GO:0005581; GO:0042338; GO:0005576; GO:0060102; GO:0042302	collagen and cuticulin-based cuticle development; cuticle development involved in collagen and cuticulin-based cuticle molting cycle; extracellular region; collagen and cuticulin-based cuticle extracellular matrix; structural constituent of cuticle; collagen trimer	protein_coding
WBGene00010461	K01D12.1	V:12377555-12378924	N2	rnp-6	OK	1.06508	0.320539	-1.7324	-2.12783	0.00235	0.0194563	yes	GO:0016021; GO:0016020	integral component of membrane; membrane	protein_coding
WBGene00000228	atn-1	V:12478412-12484452	N2	rnp-6	OK	26.9353	38.4058	0.511828	2.1958	0.0001	0.00135972	yes	GO:0003779; GO:0005865; GO:0055120; GO:0005509; GO:0005515	calcium ion binding; protein binding; striated muscle thin filament; striated muscle dense body; actin binding	protein_coding
WBGene00013900	ugt-18	V:12820264-12822758	N2	rnp-6	OK	25.3944	16.1902	-0.64939	-2.36728	0.00015	0.00195025	yes	GO:0008152; GO:0016021; GO:0016020; GO:0016740; GO:0016757; GO:0016758; GO:0015020; GO:0043231	transferase activity, transferring glycosyl groups; transferase activity; membrane; transferase activity, transferring hexosyl groups; metabolic process; glucuronosyltransferase activity; intracellular membrane-bounded organelle; integral component of membrane	protein_coding
WBGene00008097	ugt-15	V:12827778-12830109	N2	rnp-6	OK	0.14815	0.446684	1.5922	1.79848	0.0047	0.0334361	yes	GO:0008152; GO:0016021; GO:0016020; GO:0016740; GO:0016757; GO:0016758; GO:0015020; GO:0043231	transferase activity, transferring glycosyl groups; transferase activity; membrane; transferase activity, transferring hexosyl groups; metabolic process; glucuronosyltransferase activity; intracellular membrane-bounded organelle; integral component of membrane	protein_coding
WBGene00011587	T07F10.1	V:12859380-12867917	N2	rnp-6	OK	18.3354	10.4377	-0.812829	-3.09963	5e-05	0.000725861	yes	GO:0005737; GO:0016787; GO:0042277; GO:0004177; GO:0016021; GO:0016020; GO:0043171; GO:0008270; GO:0070006; GO:0006508; GO:0008233; GO:0046872; GO:0008237	peptide binding; metalloaminopeptidase activity; aminopeptidase activity; hydrolase activity; cytoplasm; peptide catabolic process; zinc ion binding; peptidase activity; metal ion binding; membrane; metallopeptidase activity; proteolysis; integral component of membrane	protein_coding
WBGene00008851	F15B9.8	V:12988531-12992186	N2	rnp-6	OK	11.0155	6.76083	-0.704258	-1.6522	0.0052	0.0361513	yes			protein_coding
WBGene00008850	F15B9.6	V:13014143-13016654	N2	rnp-6	OK	2.29514	4.96788	1.11405	2.79514	5e-05	0.000725861	yes	GO:0016021; GO:0016020	integral component of membrane; membrane	protein_coding
WBGene00001475	fmi-1	V:13019067-13033399	N2	rnp-6	OK	4.49781	3.30748	-0.443489	-1.52748	0.00785	0.0494531	yes	GO:0033564; GO:0004930; GO:0016021; GO:0016020; GO:0097376; GO:0030424; GO:0005509; GO:0005515; GO:0005886; GO:0007155; GO:0007156; GO:0007186	calcium ion binding; protein binding; homophilic cell adhesion via plasma membrane adhesion molecules; axon; interneuron axon guidance; G-protein coupled receptor activity; membrane; cell adhesion; G-protein coupled receptor signaling pathway; anterior/posterior axon guidance; integral component of membrane; plasma membrane	protein_coding
WBGene00012335	W07G4.1	V:13033528-13034164	N2	rnp-6	OK	0.819803	0	-inf		5e-05	0.000725861	yes			protein_coding
WBGene00009981	F53F1.3	V:13408241-13409832	N2	rnp-6	OK	29.5021	15.0651	-0.969607	-3.08555	5e-05	0.000725861	yes	GO:0055114; GO:0016491	oxidation-reduction process; oxidoreductase activity	protein_coding
WBGene00044920	F20G2.7	V:13758089-13759945	N2	rnp-6	OK	1.77359	0.790923	-1.16506	-2.07387	0.0008	0.00816818	yes
WBGene00044921	F53C11.9	V:13778014-13778592	N2	rnp-6	OK	14.8259	8.95169	-0.727886	-1.65397	0.0044	0.0318201	yes			protein_coding
WBGene00008629	cpt-5	V:13873171-13875878	N2	rnp-6	OK	26.0884	39.0524	0.582003	2.42985	5e-05	0.000725861	yes	GO:0016740; GO:0016746	transferase activity; transferase activity, transferring acyl groups	protein_coding
WBGene00002259	lbp-7	V:13879549-13880214	N2	rnp-6	OK	215.935	147.53	-0.549586	-2.2654	5e-05	0.000725861	yes	GO:0005215; GO:0006810; GO:0008289	transporter activity; lipid binding; transport	protein_coding
WBGene00007366	C06B3.7	V:13909747-13911524	N2	rnp-6	OK	7.08142	11.4121	0.688459	1.88612	0.00125	0.0117015	yes			protein_coding
WBGene00011194	R10D12.13,sao-1	V:13962416-13965705	N2	rnp-6	OK	86.8443	112.269	0.370462	1.54189	0.00775	0.0489842	yes	; GO:0005686	; U2 snRNP	protein_coding
WBGene00011195	R10D12.13,sao-1	V:13962416-13965705	N2	rnp-6	OK	86.8443	112.269	0.370462	1.54189	0.00775	0.0489842	yes	GO:0005737; GO:0007219; GO:0032154; GO:0060625; GO:0045746; GO:0071987; GO:0005938; GO:0005515; GO:0007275	WD40-repeat domain binding; regulation of protein deneddylation; cleavage furrow; negative regulation of Notch signaling pathway; protein binding; cell cortex; cytoplasm; multicellular organism development; Notch signaling pathway	protein_coding
WBGene00008393	D1086.6	V:14079800-14081766	N2	rnp-6	OK	44.4805	62.5036	0.490765	1.95533	0.0008	0.00816818	yes			protein_coding
WBGene00008394	D1086.7	V:14084269-14085498	N2	rnp-6	OK	53.5457	28.384	-0.915692	-3.19361	5e-05	0.000725861	yes	GO:0016021; GO:0016020	integral component of membrane; membrane	protein_coding
WBGene00008388	D1086.1	V:14098846-14100477	N2	rnp-6	OK	10.3892	6.74934	-0.622265	-1.57304	0.0075	0.0478343	yes			protein_coding
WBGene00008793	F14D7.6	V:14301420-14306444	N2	rnp-6	OK	3.6598	1.85344	-0.98156	-1.75376	0.00245	0.0200889	yes	GO:0016021; GO:0016020; GO:0055085	transmembrane transport; integral component of membrane; membrane	protein_coding
WBGene00008594	clec-57	V:14469216-14472455	N2	rnp-6	OK	15.01	9.30457	-0.689915	-2.14958	0.0003	0.00356315	yes	GO:0030246	carbohydrate binding	protein_coding
WBGene00008593	clec-227	V:14472534-14474372	N2	rnp-6	OK	3.30295	1.94158	-0.766521	-1.6768	0.00385	0.0286865	yes	GO:0030246	carbohydrate binding	protein_coding
WBGene00008596	clec-54	V:14476910-14478997	N2	rnp-6	OK	15.8533	8.26866	-0.939062	-2.89813	5e-05	0.000725861	yes	GO:0030246	carbohydrate binding	protein_coding
WBGene00008270	C53A5.13	V:14546920-14554540	N2	rnp-6	OK	3.69849	1.88486	-0.972477	-2.4836	5e-05	0.000725861	yes	GO:0016021; GO:0016020; GO:0005515	protein binding; integral component of membrane; membrane	protein_coding
WBGene00001817	haf-7	V:14773356-14777331	N2	rnp-6	OK	4.0223	5.81362	0.531416	1.61814	0.00445	0.0321073	yes	GO:0042626; GO:0006810; GO:0016021; GO:0016020; GO:0000166; GO:0016887; GO:0055085; GO:0005524	ATPase activity; integral component of membrane; ATP binding; ATPase activity, coupled to transmembrane movement of substances; membrane; nucleotide binding; transmembrane transport; transport	protein_coding
WBGene00007231	C01G10.4	V:15089754-15090021	N2	rnp-6	OK	0	1.72168	inf		0.00035	0.00407043	yes			protein_coding
WBGene00011665	T09F5.1	V:15149091-15150732	N2	rnp-6	OK	1.43701	0.651575	-1.14106	-1.75942	0.00545	0.0375212	yes	GO:0005794; GO:0006486; GO:0016021; GO:0016020; GO:0000139; GO:0016740; GO:0008378; GO:0016757	transferase activity, transferring glycosyl groups; protein glycosylation; Golgi apparatus; transferase activity; Golgi membrane; galactosyltransferase activity; membrane; integral component of membrane	protein_coding
WBGene00011668	clec-47	V:15175695-15176326	N2	rnp-6	OK	79.9649	28.1134	-1.50811	-4.92325	5e-05	0.000725861	yes	GO:0016021; GO:0016020; GO:0030246	carbohydrate binding; integral component of membrane; membrane	protein_coding
WBGene00011670	fbxa-84	V:15182439-15184130	N2	rnp-6	OK	1.83125	0.617868	-1.56746	-2.68047	0.0001	0.00135972	yes	GO:0005515	protein binding	protein_coding
WBGene00010799	chil-12	V:15241583-15243943	N2	rnp-6	OK	2.68297	1.24308	-1.10991	-2.28787	0.0001	0.00135972	yes	GO:0005737; GO:0005975; GO:0016021; GO:0016020; GO:0005576; GO:0008061; GO:0004553; GO:0004568; GO:0006032	hydrolase activity, hydrolyzing O-glycosyl compounds; extracellular region; cytoplasm; carbohydrate metabolic process; chitin catabolic process; membrane; chitinase activity; chitin binding; integral component of membrane	protein_coding
WBGene00014192	nhr-246	V:15316496-15318425	N2	rnp-6	OK	0.816646	0.301272	-1.43865	-1.64238	0.00725	0.0466777	yes			protein_coding
WBGene00007807	C29F3.7	V:15354832-15357572	N2	rnp-6	OK	124.281	50.699	-1.29357	-5.6238	5e-05	0.000725861	yes	; GO:0045087; GO:0045121	; innate immune response; membrane raft	protein_coding
WBGene00000868	cyb-3	V:15395695-15397348	N2	rnp-6	OK	362.225	472.96	0.384833	1.77746	0.00165	0.0145952	yes	GO:0005737; GO:0000079; GO:0000070; GO:0051321; GO:0000278; GO:0051445; GO:0035046; GO:0005634; GO:0001556; GO:0019901; GO:0016538; GO:0045842; GO:0007098; GO:0007049; GO:0051383; GO:0010389; GO:0045144; GO:0001934; GO:0051301	mitotic cell cycle; kinetochore organization; cyclin-dependent protein serine/threonine kinase regulator activity; protein kinase binding; cell division; cytoplasm; positive regulation of protein phosphorylation; meiotic sister chromatid segregation; centrosome cycle; nucleus; pronuclear migration; meiotic cell cycle; regulation of meiotic cell cycle; cell cycle; mitotic sister chromatid segregat…	protein_coding
WBGene00044206	T26H5.9	V:15444909-15445372	N2	rnp-6	OK	52.1686	103.454	0.987741	2.92558	5e-05	0.000725861	yes			protein_coding
WBGene00009221	acs-2	V:15567393-15569889	N2	rnp-6	OK	9.438	29.7545	1.65656	5.99695	5e-05	0.000725861	yes	GO:0003824; GO:0006631; GO:0005739; GO:0008152	metabolic process; catalytic activity; fatty acid metabolic process; mitochondrion	protein_coding
WBGene00008323	C55A1.6	V:15648068-15648804	N2	rnp-6	OK	2.71939	6.93227	1.35004	2.0668	0.0009	0.00897191	yes			protein_coding
WBGene00000412	cdr-1	V:15921360-15922820	N2	rnp-6	OK	16.9523	11.3319	-0.581093	-1.72963	0.00285	0.0225677	yes	GO:0005764; GO:1990170; GO:0016021; GO:0003674	stress response to cadmium ion; molecular_function; integral component of membrane; lysosome	protein_coding
WBGene00009485	F36G9.3	V:15957421-15959530	N2	rnp-6	OK	1.90209	0.946276	-1.00725	-1.79661	0.0045	0.0323767	yes	GO:0016021; GO:0016020	integral component of membrane; membrane	protein_coding
WBGene00009047	F22B8.4	V:16086571-16088217	N2	rnp-6	OK	1.36934	0.444023	-1.62478	-2.36061	0.00065	0.0068644	yes
WBGene00001591	glc-1	V:16219608-16221916	N2	rnp-6	OK	19.308	12.7114	-0.603075	-2.08807	0.00025	0.00303907	yes	GO:0031987; GO:0051259; GO:0006810; GO:1902476; GO:0005230; GO:0016020; GO:0005216; GO:0060079; GO:0045211; GO:0045202; GO:0005887; GO:0005886; GO:0006811; GO:0016595; GO:0008068; GO:0016021; GO:0030054	excitatory postsynaptic potential; ion transport; synapse; protein oligomerization; chloride transmembrane transport; postsynaptic membrane; integral component of plasma membrane; ion channel activity; cell junction; extracellular ligand-gated ion channel activity; extracellularly glutamate-gated chloride channel activity; transport; locomotion involved in locomotory behavior; membrane; integral …	protein_coding
WBGene00009226	cyp-37B1	V:16278190-16280614	N2	rnp-6	OK	9.03959	4.91559	-0.878894	-2.57378	5e-05	0.000725861	yes	GO:0004497; GO:0016705; GO:0020037; GO:0016021; GO:0016020; GO:0050830; GO:0005506; GO:0046872; GO:0055114; GO:0016491	oxidoreductase activity; monooxygenase activity; oxidoreductase activity, acting on paired donors, with incorporation or reduction of molecular oxygen; metal ion binding; membrane; heme binding; defense response to Gram-positive bacterium; iron ion binding; integral component of membrane; oxidation-reduction process	protein_coding
WBGene00007835	oac-7	V:16309804-16314752	N2	rnp-6	OK	0.36688	1.0924	1.57412	2.75724	5e-05	0.000725861	yes	GO:0016021; GO:0016020; GO:0016746; GO:0016740; GO:0016747	transferase activity; transferase activity, transferring acyl groups other than amino-acyl groups; transferase activity, transferring acyl groups; integral component of membrane; membrane	protein_coding
WBGene00001792	gst-44	V:16390933-16392406	N2	rnp-6	OK	3.02276	5.71392	0.918615	2.10627	0.00035	0.00407043	yes	GO:0005737; GO:0004364; GO:0005515; GO:0000302; GO:0008152; GO:0016740; GO:0009407; GO:0006749	glutathione metabolic process; cytoplasm; transferase activity; toxin catabolic process; response to reactive oxygen species; metabolic process; glutathione transferase activity; protein binding	protein_coding
WBGene00011850	T20B3.1	V:16815566-16821320	N2	rnp-6	OK	34.5826	22.9236	-0.593215	-2.35001	5e-05	0.000725861	yes	GO:0016746	transferase activity, transferring acyl groups	protein_coding
WBGene00001706	grd-17	V:16990809-16991459	N2	rnp-6	OK	0.861518	3.57839	2.05436	2.88947	5e-05	0.000725861	yes
WBGene00005444	srh-237	V:17090389-17091614	N2	rnp-6	OK	3.85387	8.17919	1.08565	2.59938	5e-05	0.000725861	yes	GO:0016021; GO:0016020; GO:0050907	detection of chemical stimulus involved in sensory perception; integral component of membrane; membrane	protein_coding
WBGene00011844	T19C9.8	V:17118153-17252309	N2	rnp-6	OK	0.743377	5.71326	2.94215	3.00074	0.00035	0.00407043	yes			protein_coding
WBGene00008575	scl-24	V:17486430-17487327	N2	rnp-6	OK	1.42582	4.18715	1.55418	2.71378	5e-05	0.000725861	yes			protein_coding
WBGene00012405	ztf-25	V:17601822-17602952	N2	rnp-6	OK	14.4759	20.8482	0.526271	1.69218	0.00265	0.0213265	yes	GO:0003676	nucleic acid binding	protein_coding
WBGene00004003	pgp-9	V:17755896-17764751	N2	rnp-6	OK	2.43864	4.05994	0.73538	2.27801	5e-05	0.000725861	yes	GO:0042626; GO:0006810; GO:0005887; GO:0016021; GO:0016020; GO:0000166; GO:0016887; GO:0055085; GO:0005524; GO:0015562	ATPase activity; integral component of plasma membrane; integral component of membrane; efflux transmembrane transporter activity; ATP binding; ATPase activity, coupled to transmembrane movement of substances; membrane; nucleotide binding; transmembrane transport; transport	protein_coding
WBGene00013343	prp-6	V:18022478-18042355	N2	rnp-6	OK	45.4698	60.7461	0.417882	1.8879	0.0015	0.0135324	yes	GO:0046540; GO:0000244; GO:0005634; GO:0000398; GO:0005515; GO:0071013; GO:0006396	catalytic step 2 spliceosome; RNA processing; protein binding; U4/U6 x U5 tri-snRNP complex; spliceosomal tri-snRNP complex assembly; nucleus; mRNA splicing, via spliceosome	protein_coding
WBGene00045416	Y37H2A.14	V:18143737-18144721	N2	rnp-6	OK	38.2665	92.4246	1.27219	4.46367	5e-05	0.000725861	yes	GO:0016021; GO:0016020	integral component of membrane; membrane	protein_coding
WBGene00008891	clec-42	V:18191442-18194262	N2	rnp-6	OK	0.106212	1.04521	3.29877	3.65821	0.0001	0.00135972	yes	GO:0030246	carbohydrate binding	protein_coding
WBGene00007440	C08E8.4	V:18371845-18373531	N2	rnp-6	OK	7.97184	21.8879	1.45715	4.3606	5e-05	0.000725861	yes	GO:0045087; GO:0019239; GO:0009451	innate immune response; RNA modification; deaminase activity	protein_coding
WBGene00013947	ZK228.4	V:18462803-18465320	N2	rnp-6	OK	7.2258	3.76393	-0.940916	-2.1529	0.00035	0.00407043	yes	; GO:0045087; GO:0008080	; innate immune response; N-acetyltransferase activity	protein_coding
WBGene00013073	hmit-1.1	V:18516788-18524221	N2	rnp-6	OK	24.1978	41.7091	0.785484	3.20121	5e-05	0.000725861	yes	GO:0022891; GO:0005355; GO:0006810; GO:0005351; GO:0016324; GO:0005215; GO:0016021; GO:0016020; GO:0046323; GO:0022857; GO:1904659; GO:0015992; GO:0035428; GO:0055085	transporter activity; glucose transmembrane transporter activity; substrate-specific transmembrane transporter activity; apical plasma membrane; integral component of membrane; glucose transmembrane transport; transmembrane transporter activity; hexose transmembrane transport; membrane; glucose import; proton transport; transmembrane transport; transport; sugar:proton symporter activity	protein_coding
WBGene00013489	col-42	V:18638483-18639588	N2	rnp-6	OK	39.4638	60.6951	0.621049	2.35572	5e-05	0.000725861	yes	GO:0016021; GO:0016020; GO:0005581; GO:0042302	structural constituent of cuticle; collagen trimer; integral component of membrane; membrane	protein_coding
WBGene00044976	T26H2.10	V:19223852-19225074	N2	rnp-6	OK	1.73831	0.672202	-1.37072	-2.23891	0.0008	0.00816818	yes
WBGene00012810	nceh-1	V:19377443-19381031	N2	rnp-6	OK	4.25359	6.32461	0.572295	1.54844	0.00795	0.0499487	yes	GO:0016787; GO:0016021; GO:0016020; GO:0052689; GO:0008152; GO:0009056	carboxylic ester hydrolase activity; hydrolase activity; metabolic process; membrane; catabolic process; integral component of membrane	protein_coding
WBGene00012819	Y43F8B.9	V:19479202-19480465	N2	rnp-6	OK	9.54027	4.0694	-1.22921	-2.7639	5e-05	0.000725861	yes			protein_coding
WBGene00010931	M162.5	V:19761050-19766769	N2	rnp-6	OK	3.73294	2.17163	-0.78153	-1.86121	0.0019	0.0163938	yes	GO:0022857; GO:0016021; GO:0016020; GO:0006820; GO:0055085	anion transport; transmembrane transport; transmembrane transporter activity; integral component of membrane; membrane	protein_coding
WBGene00013763	Y113G7B.14	V:20226834-20228829	N2	rnp-6	OK	3.20656	5.83056	0.862608	2.4225	5e-05	0.000725861	yes
WBGene00010005	cnc-7	V:20394072-20394732	N2	rnp-6	OK	16.0618	8.20745	-0.968623	-1.72005	0.0053	0.0367133	yes	GO:0016021; GO:0016020	integral component of membrane; membrane	protein_coding
WBGene00005147	srd-70	V:20454110-20456433	N2	rnp-6	OK	0.3496	0.869486	1.31446	1.7183	0.0051	0.0356206	yes	GO:0016021; GO:0016020	integral component of membrane; membrane	protein_coding
WBGene00009172	F26F2.7	V:20580995-20590340	N2	rnp-6	OK	15.3008	20.9869	0.455883	1.76548	0.00265	0.0213265	yes	GO:0016021; GO:0016020	integral component of membrane; membrane	protein_coding
WBGene00012185	W01F3.2	V:20660367-20662031	N2	rnp-6	OK	30.1465	46.0788	0.61211	2.28312	0.00015	0.00195025	yes			protein_coding
WBGene00009292	F31D4.5	V:20854142-20858576	N2	rnp-6	OK	4.52932	1.44989	-1.64335	-3.73267	5e-05	0.000725861	yes			protein_coding
WBGene00019817	R02C2.6	V:238962-240362	N2	rnp-6	OK	3.34	1.81698	-0.878307	-1.79472	0.00305	0.0238181	yes	GO:0005737; GO:0006468; GO:0005634; GO:0000166; GO:0004674; GO:0004672; GO:0035556; GO:0005524	intracellular signal transduction; protein phosphorylation; cytoplasm; protein kinase activity; nucleus; ATP binding; protein serine/threonine kinase activity; nucleotide binding	protein_coding
WBGene00000022	abt-4	V:323776-330727	N2	rnp-6	OK	19.0025	10.7975	-0.815493	-3.39871	5e-05	0.000725861	yes	GO:0042626; GO:0006810; GO:0043231; GO:0006869; GO:0005215; GO:0016021; GO:0016020; GO:0000166; GO:0016887; GO:0055085; GO:0005524	transporter activity; ATPase activity; transmembrane transport; lipid transport; ATP binding; ATPase activity, coupled to transmembrane movement of substances; membrane; intracellular membrane-bounded organelle; nucleotide binding; integral component of membrane; transport	protein_coding
WBGene00022644	dod-19	V:411778-414760	N2	rnp-6	OK	90.0634	119.258	0.405077	1.76643	0.0018	0.0156835	yes	; GO:0045087; GO:0045121	; innate immune response; membrane raft	protein_coding
WBGene00022645	ZK6.11	V:415712-417706	N2	rnp-6	OK	246.662	317.519	0.364309	1.67179	0.0034	0.0259387	yes	; GO:0045087; GO:0045121	; innate immune response; membrane raft	protein_coding
WBGene00020016	lipl-3	V:521675-524218	N2	rnp-6	OK	1.16341	3.25887	1.48602	3.12564	5e-05	0.000725861	yes	GO:0005764; GO:0016787; GO:0006629; GO:0016788; GO:0016042	hydrolase activity; lysosome; lipid catabolic process; lipid metabolic process; hydrolase activity, acting on ester bonds	protein_coding
WBGene00017962	fbxa-72	V:674910-676753	N2	rnp-6	OK	4.54503	10.7185	1.23774	3.36336	5e-05	0.000725861	yes			protein_coding
WBGene00001564	icl-1	V:724206-728103	N2	rnp-6	OK	446.999	753.697	0.753713	3.25141	5e-05	0.000725861	yes	GO:0016829; GO:0006099; GO:0005739; GO:0004474; GO:0004451; GO:0003824; GO:0016740; GO:0019752; GO:0008152; GO:0008340; GO:0006097	malate synthase activity; carboxylic acid metabolic process; lyase activity; transferase activity; glyoxylate cycle; metabolic process; determination of adult lifespan; catalytic activity; mitochondrion; tricarboxylic acid cycle; isocitrate lyase activity	protein_coding
WBGene00019973	R09A1.3	V:1023781-1027065	N2	rnp-6	OK	3.67019	6.80979	0.891754	2.22686	0.00025	0.00303907	yes			protein_coding
WBGene00021072	W07B8.4	V:1130087-1131930	N2	rnp-6	OK	1.14606	5.6632	2.30494	4.27289	5e-05	0.000725861	yes	GO:0016787; GO:0005615; GO:0051603; GO:0005764; GO:0004197; GO:0006508; GO:0008233; GO:0008234	extracellular space; lysosome; hydrolase activity; peptidase activity; cysteine-type endopeptidase activity; proteolysis involved in cellular protein catabolic process; proteolysis; cysteine-type peptidase activity	protein_coding
WBGene00022286	rga-4	V:1373588-1383239	N2	rnp-6	OK	21.2481	29.8047	0.488201	2.0887	0.0001	0.00135972	yes	; GO:0045167; GO:0043547; GO:0032970; GO:0005096; GO:0030866; GO:0007165	; asymmetric protein localization involved in cell fate determination; cortical actin cytoskeleton organization; signal transduction; positive regulation of GTPase activity; regulation of actin filament-based process; GTPase activator activity	protein_coding
WBGene00000556	cnc-2	V:1449666-1450189	N2	rnp-6	OK	3.04555	9.52335	1.64476	2.51037	5e-05	0.000725861	yes	GO:0005615; GO:0016021; GO:0016020; GO:0050832; GO:0003674; GO:0050829; GO:0045087	innate immune response; defense response to fungus; extracellular space; molecular_function; membrane; integral component of membrane; defense response to Gram-negative bacterium	protein_coding
WBGene00018707	oac-31	V:1538352-1541824	N2	rnp-6	OK	7.36759	4.93492	-0.578167	-1.77656	0.00255	0.0206975	yes	GO:0016021; GO:0016020; GO:0016746; GO:0016740; GO:0016747	transferase activity; transferase activity, transferring acyl groups other than amino-acyl groups; transferase activity, transferring acyl groups; integral component of membrane; membrane	protein_coding
WBGene00018708	oac-32	V:1542516-1545791	N2	rnp-6	OK	0.752723	1.34153	0.833688	1.68288	0.0031	0.0241392	yes	GO:0016021; GO:0016020; GO:0016746; GO:0016740; GO:0016747	transferase activity; transferase activity, transferring acyl groups other than amino-acyl groups; transferase activity, transferring acyl groups; integral component of membrane; membrane	protein_coding
WBGene00020340	T08B1.1	V:1979434-1987029	N2	rnp-6	OK	40.5217	29.8431	-0.441297	-1.7653	0.00215	0.018108	yes	GO:0005355; GO:0035428; GO:0015992; GO:0016021; GO:0016020; GO:0046323; GO:0022857; GO:1904659; GO:0005351; GO:0055085	integral component of membrane; glucose transmembrane transporter activity; proton transport; glucose transmembrane transport; transmembrane transporter activity; membrane; glucose import; transmembrane transport; hexose transmembrane transport; sugar:proton symporter activity	protein_coding
WBGene00000111	alh-5	V:1996108-1999581	N2	rnp-6	OK	18.6571	13.2117	-0.497914	-1.67167	0.00355	0.0268498	yes	GO:0006081; GO:0004030; GO:0055114; GO:0008152; GO:0016491	metabolic process; aldehyde dehydrogenase [NAD(P)+] activity; cellular aldehyde metabolic process; oxidation-reduction process; oxidoreductase activity	protein_coding
WBGene00019089	clec-206	V:2000417-2004329	N2	rnp-6	OK	0.235375	0.74211	1.65667	2.25216	0.00115	0.01096	yes	GO:0045087; GO:0030246	innate immune response; carbohydrate binding	protein_coding
WBGene00021491	comt-4	V:2049222-2050172	N2	rnp-6	OK	247.749	41.9424	-2.5624	-9.77817	5e-05	0.000725861	yes	GO:0008168; GO:0016740; GO:0032259; GO:0008171	transferase activity; methyltransferase activity; O-methyltransferase activity; methylation	protein_coding
WBGene00021235	Y19D10B.6	V:2318524-2321052	N2	rnp-6	OK	1.12492	2.14068	0.92825	1.93822	0.0017	0.0149637	yes	GO:0006508; GO:0008237	metallopeptidase activity; proteolysis	protein_coding
WBGene00016052	dod-3	V:2730509-2731097	N2	rnp-6	OK	7.07319	22.0974	1.64344	4.14083	5e-05	0.000725861	yes	GO:0016021; GO:0016020; GO:0007165	signal transduction; integral component of membrane; membrane	protein_coding
WBGene00004130	ketn-1	V:2781482-2807860	N2	rnp-6	OK	5.3802	12.6629	1.23488	5.26539	5e-05	0.000725861	yes	GO:0051015; GO:0005515; GO:0031674	actin filament binding; protein binding; I band	protein_coding
WBGene00018138	folt-2	V:2872464-2875600	N2	rnp-6	OK	32.4378	56.6187	0.803604	3.28862	5e-05	0.000725861	yes	GO:0006810; GO:0016021; GO:0016020; GO:0022857; GO:0055085; GO:0005542	integral component of membrane; transmembrane transporter activity; membrane; folic acid binding; transmembrane transport; transport	protein_coding
WBGene00001781	gst-33	V:3467452-3468501	N2	rnp-6	OK	11.7544	17.2512	0.553494	1.58484	0.00645	0.0426741	yes	GO:0016740; GO:0005515	transferase activity; protein binding	protein_coding
WBGene00003096	lys-7	V:3481418-3482600	N2	rnp-6	OK	123.548	203.876	0.722622	3.16345	5e-05	0.000725861	yes	GO:0050829; GO:0002376; GO:0045087; GO:0050830; GO:0050832	immune system process; innate immune response; defense response to Gram-positive bacterium; defense response to fungus; defense response to Gram-negative bacterium	protein_coding
WBGene00019101	F59B1.10	V:3644744-3647954	N2	rnp-6	OK	0.451727	1.32676	1.55438	2.48576	0.00015	0.00195025	yes			protein_coding
WBGene00018543	ugt-32	V:3841858-3844007	N2	rnp-6	OK	0.670263	2.14069	1.67528	3.21951	5e-05	0.000725861	yes	GO:0043231; GO:0016021; GO:0016020; GO:0016740; GO:0008152; GO:0016758; GO:0015020	transferase activity; membrane; integral component of membrane; metabolic process; glucuronosyltransferase activity; intracellular membrane-bounded organelle; transferase activity, transferring hexosyl groups	protein_coding
WBGene00016788	C49G7.10	V:4040408-4042004	N2	rnp-6	OK	12.0195	21.0232	0.806597	2.47902	5e-05	0.000725861	yes	; GO:0045087	; innate immune response	protein_coding
WBGene00022523	ZC132.4	V:4301292-4304394	N2	rnp-6	OK	0.707464	0.350248	-1.01428	-1.74462	0.0047	0.0334361	yes
WBGene00235310	R02D1.2	V:4320459-4322076	N2	rnp-6	OK	1.68725	3.36389	0.995456	2.04523	0.00085	0.00858204	yes	GO:0003824; GO:0009058	catalytic activity; biosynthetic process	protein_coding
WBGene00018813	F54D11.3	V:4635527-4637014	N2	rnp-6	OK	10.3743	6.31604	-0.71592	-1.99643	0.00085	0.00858204	yes			protein_coding
WBGene00000712	col-139	V:4652381-4653986	N2	rnp-6	OK	43.8014	74.2255	0.760937	2.96122	5e-05	0.000725861	yes	GO:0016021; GO:0016020; GO:0005581; GO:0042302	structural constituent of cuticle; collagen trimer; integral component of membrane; membrane	protein_coding
WBGene00003528	nas-9	V:4836027-4840010	N2	rnp-6	OK	8.81739	4.72586	-0.899776	-2.67975	5e-05	0.000725861	yes	; GO:0016787; GO:0004222; GO:0005576; GO:0008270; GO:0006508; GO:0008233; GO:0046872; GO:0008237	; peptidase activity; extracellular region; metalloendopeptidase activity; zinc ion binding; hydrolase activity; metal ion binding; metallopeptidase activity; proteolysis	protein_coding
WBGene00016511	C37H5.13	V:4855324-4862965	N2	rnp-6	OK	17.7893	26.5803	0.579346	2.10194	0.0001	0.00135972	yes	GO:0005782; GO:0006637; GO:0047617; GO:0009062	acyl-CoA metabolic process; acyl-CoA hydrolase activity; peroxisomal matrix; fatty acid catabolic process	protein_coding
WBGene00020594	ugt-10	V:4898216-4900082	N2	rnp-6	OK	0.0918827	0.422498	2.20108	2.10183	0.0048	0.0339756	yes	GO:0043231; GO:0016021; GO:0016020; GO:0016740; GO:0008152; GO:0016758; GO:0015020	transferase activity; membrane; integral component of membrane; metabolic process; glucuronosyltransferase activity; intracellular membrane-bounded organelle; transferase activity, transferring hexosyl groups	protein_coding
WBGene00003574	ncx-9	V:4991504-4995064	N2	rnp-6	OK	0.127972	0.61653	2.26835	2.67149	0.0006	0.00643061	yes	GO:0086036; GO:0086038; GO:0016021; GO:0016020; GO:0005739; GO:1905815; GO:0099093; GO:0055085	regulation of dorsal/ventral axon guidance; regulation of cardiac muscle cell membrane potential; mitochondrial calcium release; integral component of membrane; membrane; mitochondrion; calcium:sodium antiporter activity involved in regulation of cardiac muscle cell membrane potential; transmembrane transport	protein_coding
WBGene00019644	cpt-4	V:5023737-5027725	N2	rnp-6	OK	16.1528	10.2564	-0.655265	-2.33284	0.0001	0.00135972	yes	GO:0016740; GO:0016746	transferase activity; transferase activity, transferring acyl groups	protein_coding
WBGene00019645	swt-7	V:5029323-5030811	N2	rnp-6	OK	88.7616	63.5534	-0.481965	-1.91064	0.0009	0.00897191	yes	GO:0006810; GO:0051119; GO:0016021; GO:0016020; GO:0034219; GO:0008643; GO:0050829; GO:0045087	innate immune response; carbohydrate transmembrane transport; transport; carbohydrate transport; membrane; sugar transmembrane transporter activity; integral component of membrane; defense response to Gram-negative bacterium	protein_coding
WBGene00003374	mlk-1	V:5053618-5064803	N2	rnp-6	OK	10.0574	7.54569	-0.414537	-1.51414	0.00755	0.0480515	yes	GO:0000186; GO:0005080; GO:0004672; GO:0042594; GO:0050829; GO:1903616; GO:0030971; GO:0000166; GO:0004674; GO:0016740; GO:0048680; GO:0046688; GO:0016310; GO:0046872; GO:0005524; GO:0006468; GO:0031103; GO:0016301; GO:0019901; GO:0008340; GO:0048691; GO:0005622; GO:0097110; GO:0005515; GO:0004709; GO:0001934	receptor tyrosine kinase binding; protein kinase C binding; response to starvation; nucleotide binding; protein binding; intracellular; positive regulation of protein phosphorylation; protein kinase activity; kinase activity; scaffold protein binding; ATP binding; metal ion binding; axon regeneration; determination of adult lifespan; MAPK cascade involved in axon regeneration; defense response to…	protein_coding
WBGene00021977	Y58A7A.3	V:5077848-5080896	N2	rnp-6	OK	9.31656	13.7917	0.565935	2.07149	0.00045	0.00504819	yes			protein_coding
WBGene00016862	C52A10.1	V:5230476-5233888	N2	rnp-6	OK	13.4809	18.9537	0.491571	1.74428	0.00205	0.0174119	yes	GO:0016787; GO:0052689	hydrolase activity; carboxylic ester hydrolase activity	protein_coding
WBGene00021731	Y49G5A.1	V:5286342-5287360	N2	rnp-6	OK	0.443488	1.39699	1.65535	1.69324	0.0073	0.0469136	yes	GO:0010951; GO:0004867	serine-type endopeptidase inhibitor activity; negative regulation of endopeptidase activity	protein_coding
WBGene00000373	cyp-14A5	V:5421011-5423305	N2	rnp-6	OK	14.6048	26.1837	0.84223	3.04416	5e-05	0.000725861	yes	GO:0004497; GO:0020037; GO:0016705; GO:0005506; GO:0046872; GO:0055114; GO:0016491	oxidoreductase activity; iron ion binding; oxidoreductase activity, acting on paired donors, with incorporation or reduction of molecular oxygen; metal ion binding; heme binding; monooxygenase activity; oxidation-reduction process	protein_coding
WBGene00016061	hpo-15	V:5505295-5513830	N2	rnp-6	OK	31.4372	14.3518	-1.13125	-3.33628	5e-05	0.000725861	yes	GO:0055114; GO:0016491	oxidation-reduction process; oxidoreductase activity	protein_coding
WBGene00019757	memb-2	V:5617653-5620140	N2	rnp-6	OK	73.2078	53.9689	-0.439868	-1.72144	0.002	0.017068	yes	GO:0006888; GO:0005794; GO:0006891; GO:0006810; GO:0000149; GO:0006896; GO:0016021; GO:0016020; GO:0031902; GO:0031201; GO:0005789; GO:0048280; GO:0042147; GO:0012507; GO:0015031; GO:0005484; GO:0006623; GO:0005829	endoplasmic reticulum membrane; ER to Golgi vesicle-mediated transport; SNARE complex; vesicle fusion with Golgi apparatus; Golgi apparatus; cytosol; SNAP receptor activity; membrane; intra-Golgi vesicle-mediated transport; retrograde transport, endosome to Golgi; late endosome membrane; SNARE binding; Golgi to vacuole transport; protein transport; protein targeting to vacuole; integral component…	protein_coding
WBGene00004104	pqn-13	V:5669647-5676087	N2	rnp-6	OK	0.941069	0.332996	-1.4988	-2.43661	0.00025	0.00303907	yes			protein_coding
WBGene00018427	F44E7.5	V:5778817-5781015	N2	rnp-6	OK	18.7689	27.7031	0.561707	2.08436	0.0002	0.00250605	yes			protein_coding
WBGene00022577	nstp-3	V:5794862-5798128	N2	rnp-6	OK	0.759222	0.17259	-2.13717	-2.12251	0.00615	0.0411542	yes	GO:0015992; GO:0016021; GO:0016020; GO:0008643; GO:0005351; GO:0000139	proton transport; carbohydrate transport; membrane; Golgi membrane; integral component of membrane; sugar:proton symporter activity	protein_coding
WBGene00000713	col-140	V:5835852-5836841	N2	rnp-6	OK	1431.65	1903.39	0.410888	1.81858	0.0015	0.0135324	yes	GO:0005581; GO:0042302	structural constituent of cuticle; collagen trimer	protein_coding
WBGene00017835	F26F12.4	V:5866133-5867952	N2	rnp-6	OK	1.69483	0.541117	-1.64713	-2.06629	0.00265	0.0213265	yes	GO:0016021; GO:0016020	integral component of membrane; membrane	protein_coding
WBGene00001508	fut-8	V:5986966-5990252	N2	rnp-6	OK	7.82434	5.37088	-0.542812	-1.66712	0.00375	0.0280629	yes	GO:0036065; GO:0005794; GO:0036071; GO:0005515; GO:0006486; GO:0006487; GO:0008424; GO:0016021; GO:0016020; GO:0046702; GO:0008417; GO:0016740; GO:0016757; GO:0032580; GO:0046872; GO:0033578; GO:0046921	transferase activity, transferring glycosyl groups; galactoside 6-L-fucosyltransferase activity; protein glycosylation; protein N-linked glycosylation; Golgi apparatus; Golgi cisterna membrane; transferase activity; N-glycan fucosylation; protein glycosylation in Golgi; fucosyltransferase activity; alpha-(1->6)-fucosyltransferase activity; metal ion binding; membrane; glycoprotein 6-alpha-L-fucos…	protein_coding
WBGene00019808	R01B10.6	V:6051375-6053238	N2	rnp-6	OK	56.4322	39.583	-0.511637	-1.96022	0.00055	0.00597832	yes	GO:0016021; GO:0016020; GO:0019915	integral component of membrane; lipid storage; membrane	protein_coding
WBGene00001581	gfi-1	V:6392535-6399921	N2	rnp-6	OK	385.209	277.045	-0.475521	-1.99905	0.00075	0.00772691	yes	GO:0045121; GO:0006338	membrane raft; chromatin remodeling	protein_coding
WBGene00022848	ZK1055.7	V:6602736-6605375	N2	rnp-6	OK	16.3285	38.6439	1.24285	4.77076	5e-05	0.000725861	yes	GO:0045087; GO:0005515	innate immune response; protein binding	protein_coding
WBGene00004062	pmp-5	V:6662190-6665813	N2	rnp-6	OK	24.4204	52.0477	1.09174	4.35299	5e-05	0.000725861	yes	GO:0042626; GO:0006810; GO:0016021; GO:0016020; GO:0000166; GO:0016887; GO:0055085; GO:0005524	ATPase activity; integral component of membrane; ATP binding; ATPase activity, coupled to transmembrane movement of substances; membrane; nucleotide binding; transmembrane transport; transport	protein_coding
WBGene00003473	mtl-1	V:6691368-6691863	N2	rnp-6	OK	534.954	230.836	-1.21255	-4.9658	5e-05	0.000725861	yes	GO:0005737; GO:0046872; GO:0010288; GO:0008270; GO:0046689; GO:0046870; GO:0005507	response to mercury ion; cytoplasm; cadmium ion binding; zinc ion binding; copper ion binding; metal ion binding; response to lead ion	protein_coding
WBGene00020808	clik-1	V:6765559-6768788	N2	rnp-6	OK	199.498	275.628	0.46635	2.16857	0.00015	0.00195025	yes			protein_coding
WBGene00020527	T15B7.15	V:6836724-6838630	N2	rnp-6	OK	0.655275	0.186979	-1.80922	-1.93596	0.0075	0.0478343	yes			protein_coding
WBGene00005188	srg-31	V:6950834-6953897	N2	rnp-6	OK	0.0550451	1.61798	4.87743	4.25217	0.0059	0.0398386	yes	GO:0007606; GO:0004888; GO:0016021; GO:0016020; GO:0007165	sensory perception of chemical stimulus; transmembrane signaling receptor activity; signal transduction; integral component of membrane; membrane	protein_coding
WBGene00006666	twk-11	V:7028328-7036442	N2	rnp-6	OK	0.579172	0.219463	-1.40002	-2.57613	0.0002	0.00250605	yes	GO:0005267; GO:0006810; GO:0071805; GO:0016021; GO:0016020; GO:0030322; GO:0005887; GO:0022841; GO:0006811	integral component of plasma membrane; potassium ion transmembrane transport; ion transport; potassium channel activity; stabilization of membrane potential; membrane; potassium ion leak channel activity; integral component of membrane; transport	protein_coding
WBGene00017331	ugt-37,ugt-40	V:7139482-7145318	N2	rnp-6	OK	3.37237	10.7102	1.66714	1.32765	0.0078	0.0492264	yes	GO:0043231; GO:0016021; GO:0016020; GO:0016740; GO:0008152; GO:0016758; GO:0015020	transferase activity; membrane; integral component of membrane; metabolic process; glucuronosyltransferase activity; intracellular membrane-bounded organelle; transferase activity, transferring hexosyl groups	protein_coding
WBGene00017332	ugt-37,ugt-40	V:7139482-7145318	N2	rnp-6	OK	3.37237	10.7102	1.66714	1.32765	0.0078	0.0492264	yes	GO:0043231; GO:0016021; GO:0016020; GO:0016740; GO:0008152; GO:0016758; GO:0015020	transferase activity; membrane; integral component of membrane; metabolic process; glucuronosyltransferase activity; intracellular membrane-bounded organelle; transferase activity, transferring hexosyl groups	protein_coding
WBGene00001399	fat-7	V:7151355-7153146	N2	rnp-6	OK	39.7924	378.302	3.24897	12.4801	5e-05	0.000725861	yes	GO:0006633; GO:0006631; GO:0006629; GO:0016021; GO:0016020; GO:0016717; GO:0005789; GO:0004768; GO:0007275; GO:0055114; GO:0016491	endoplasmic reticulum membrane; fatty acid metabolic process; oxidoreductase activity, acting on paired donors, with oxidation of a pair of donors resulting in the reduction of molecular oxygen to two molecules of water; oxidoreductase activity; fatty acid biosynthetic process; stearoyl-CoA 9-desaturase activity; oxidation-reduction process; lipid metabolic process; membrane; multicellular organi…	protein_coding
WBGene00017335	F10D2.10	V:7154509-7156224	N2	rnp-6	OK	11.615	27.8307	1.26069	4.151	5e-05	0.000725861	yes	GO:0016787	hydrolase activity	protein_coding
WBGene00017336	ugt-41	V:7161067-7163595	N2	rnp-6	OK	10.7478	16.9629	0.658341	2.28575	0.0002	0.00250605	yes	GO:0043231; GO:0016021; GO:0016020; GO:0016740; GO:0008152; GO:0016758; GO:0015020	transferase activity; membrane; integral component of membrane; metabolic process; glucuronosyltransferase activity; intracellular membrane-bounded organelle; transferase activity, transferring hexosyl groups	protein_coding
WBGene00015362	fbxa-105	V:7390526-7392087	N2	rnp-6	OK	9.33242	5.63196	-0.728613	-1.9931	0.00095	0.00937283	yes	GO:0045087; GO:0005515	innate immune response; protein binding	protein_coding
WBGene00017565	ddo-2	V:7433400-7435032	N2	rnp-6	OK	19.3133	33.3393	0.78763	2.38136	5e-05	0.000725861	yes	GO:0005737; GO:0008445; GO:0003884; GO:0055114; GO:0047821; GO:0046416; GO:0071949; GO:0016491	cytoplasm; D-amino-acid oxidase activity; FAD binding; oxidoreductase activity; oxidation-reduction process; D-amino acid metabolic process; D-aspartate oxidase activity; D-glutamate oxidase activity	protein_coding
WBGene00003731	nhx-3	V:7539314-7544838	N2	rnp-6	OK	3.13742	2.04056	-0.620617	-1.58434	0.00705	0.0457217	yes	GO:0015386; GO:0015297; GO:0006810; GO:0098719; GO:0071805; GO:1902600; GO:0006812; GO:0016021; GO:0016020; GO:0015299; GO:0006814; GO:0051453; GO:0012505; GO:0005886; GO:0006811; GO:0006885; GO:0015385; GO:0055085	hydrogen ion transmembrane transport; cation transport; sodium ion import across plasma membrane; antiporter activity; solute:proton antiporter activity; potassium:proton antiporter activity; potassium ion transmembrane transport; integral component of membrane; ion transport; sodium:proton antiporter activity; sodium ion transport; plasma membrane; membrane; regulation of pH; endomembrane system…	protein_coding
WBGene00015709	cyp-33A1	V:7679320-7681537	N2	rnp-6	OK	22.1779	29.469	0.410078	1.56792	0.0062	0.0413837	yes	GO:0004497; GO:0008395; GO:0020037; GO:0016705; GO:0005506; GO:0046872; GO:0055114; GO:0016491	oxidoreductase activity; iron ion binding; oxidoreductase activity, acting on paired donors, with incorporation or reduction of molecular oxygen; steroid hydroxylase activity; metal ion binding; heme binding; monooxygenase activity; oxidation-reduction process	protein_coding
WBGene00017640	F20D6.11	V:8196769-8199094	N2	rnp-6	OK	13.0708	9.24909	-0.498967	-1.66923	0.00375	0.0280629	yes	GO:0050660; GO:0005783; GO:0097194; GO:0051537; GO:0005739; GO:0005743; GO:0045454; GO:0055114; GO:0016491	2 iron, 2 sulfur cluster binding; mitochondrial inner membrane; flavin adenine dinucleotide binding; endoplasmic reticulum; oxidoreductase activity; oxidation-reduction process; mitochondrion; execution phase of apoptosis; cell redox homeostasis	protein_coding
WBGene00044554	F41E6.15	V:8602083-8602825	N2	rnp-6	OK	23.8357	13.5675	-0.812967	-2.03201	0.00135	0.0124346	yes			protein_coding
WBGene00018293	F41E6.12	V:8626901-8629106	N2	rnp-6	OK	4.50222	7.116	0.660428	1.70378	0.00345	0.0262347	yes			protein_coding
WBGene00017881	asp-13	V:8641490-8643225	N2	rnp-6	OK	53.9872	90.7126	0.748685	3.20656	5e-05	0.000725861	yes	GO:0016787; GO:0008233; GO:0004190; GO:0030163; GO:0006508	hydrolase activity; peptidase activity; proteolysis; aspartic-type endopeptidase activity; protein catabolic process	protein_coding
WBGene00001924	his-50	V:8847392-8847704	N2	rnp-6	OK	903.838	479.493	-0.914555	-3.48101	5e-05	0.000725861	yes	GO:0042393; GO:0005634; GO:0003677; GO:0000786; GO:0000788; GO:0046982; GO:0005694; GO:0006334	nucleosome; histone binding; DNA binding; protein heterodimerization activity; nucleosome assembly; nuclear nucleosome; nucleus; chromosome	protein_coding
WBGene00001925	his-51	V:8849787-8850171	N2	rnp-6	OK	42.5356	0.462716	-6.5224	-6.64465	0.0015	0.0135324	yes	GO:0006281; GO:0006342; GO:0005634; GO:0000786; GO:0006355; GO:0000790; GO:0003677; GO:0046982; GO:0005694	nuclear chromatin; nucleosome; regulation of transcription, DNA-templated; DNA binding; chromatin silencing; protein heterodimerization activity; nucleus; DNA repair; chromosome	protein_coding
WBGene00001895	his-21	V:8891882-8892266	N2	rnp-6	OK	3.1975	7.99008	1.32127	2.19963	0.00045	0.00504819	yes	GO:0006281; GO:0006342; GO:0005634; GO:0000786; GO:0006355; GO:0000790; GO:0003677; GO:0046982; GO:0005694	nuclear chromatin; nucleosome; regulation of transcription, DNA-templated; DNA binding; chromatin silencing; protein heterodimerization activity; nucleus; DNA repair; chromosome	protein_coding
WBGene00016097	C25E10.8	V:9053316-9054017	N2	rnp-6	OK	18.2351	10.9081	-0.74131	-1.8913	0.0015	0.0135324	yes			protein_coding
WBGene00023417	swm-1	V:9054222-9054877	N2	rnp-6	OK	28.1838	14.853	-0.924112	-2.49186	5e-05	0.000725861	yes			protein_coding
WBGene00016099	C25E10.10	V:9055323-9056382	N2	rnp-6	OK	8.4597	4.58148	-0.884793	-2.06406	0.00075	0.00772691	yes			protein_coding
WBGene00017658	F21C10.9	V:9096006-9098696	N2	rnp-6	OK	13.2524	38.8976	1.55342	2.17396	0.0014	0.0128195	yes	GO:0008080	N-acetyltransferase activity	protein_coding
WBGene00019466	tos-1	V:9343276-9344218	N2	rnp-6	OK	111.533	222.91	0.998985	4.0332	5e-05	0.000725861	yes			protein_coding
WBGene00017092	E02C12.6	V:9369496-9371086	N2	rnp-6	OK	3.78579	2.35098	-0.687334	-1.59286	0.00755	0.0480515	yes			protein_coding
WBGene00017093	E02C12.8	V:9371639-9373590	N2	rnp-6	OK	12.705	26.3284	1.05122	1.59431	0.005	0.035079	yes			protein_coding
WBGene00000720	col-147	V:9632270-9633337	N2	rnp-6	OK	1.02207	2.78506	1.44622	2.44936	0.00015	0.00195025	yes	GO:0016021; GO:0016020; GO:0005581; GO:0042302	structural constituent of cuticle; collagen trimer; integral component of membrane; membrane	protein_coding
WBGene00008255	C51E3.10	V:10160436-10161115	N2	rnp-6	OK	24.3628	15.0019	-0.699529	-1.65126	0.00535	0.0369777	yes	; GO:0016021; GO:0016020	; integral component of membrane; membrane	protein_coding
WBGene00014106	ZK856.5	V:10186006-10190131	N2	rnp-6	OK	10.336	6.33395	-0.706497	-2.11828	0.0002	0.00250605	yes	GO:0016787	hydrolase activity	protein_coding
WBGene00000601	col-12	V:10423906-10425092	N2	rnp-6	OK	0.571979	1.34962	1.23853	1.75336	0.0024	0.0197654	yes	GO:0005581; GO:0042302	structural constituent of cuticle; collagen trimer	protein_coding
WBGene00008871	Y32F6A.4,tag-314	V:10426632-10433604	N2	rnp-6	OK	42.2407	31.1604	-0.438917	-1.7914	0.00145	0.013173	yes	GO:0005737; GO:0031624; GO:0032436; GO:0061630; GO:0016021; GO:0016020; GO:0000151; GO:0016567; GO:0016740; GO:0042787; GO:0008270; GO:0005515; GO:0046872; GO:0004842; GO:0000209	positive regulation of proteasomal ubiquitin-dependent protein catabolic process; ubiquitin protein ligase activity; transferase activity; membrane; zinc ion binding; ubiquitin conjugating enzyme binding; ubiquitin-protein transferase activity; metal ion binding; protein ubiquitination involved in ubiquitin-dependent protein catabolic process; cytoplasm; protein ubiquitination; protein binding; i…	protein_coding
WBGene00012529	Y32F6A.4,tag-314	V:10426632-10433604	N2	rnp-6	OK	42.2407	31.1604	-0.438917	-1.7914	0.00145	0.013173	yes	GO:0016021; GO:0016020; GO:0003333; GO:0015171	amino acid transmembrane transport; amino acid transmembrane transporter activity; integral component of membrane; membrane	protein_coding
WBGene00007947	C35A5.3	V:10497058-10501397	N2	rnp-6	OK	13.3756	7.80243	-0.777606	-2.4249	5e-05	0.000725861	yes	GO:0022857; GO:0016021; GO:0016020; GO:0006820; GO:0055085	anion transport; transmembrane transport; transmembrane transporter activity; integral component of membrane; membrane	protein_coding
WBGene00044024	C35A5.11	V:10502115-10503045	N2	rnp-6	OK	7.29048	2.10359	-1.79316	-3.01072	5e-05	0.000725861	yes			protein_coding
WBGene00008370	D1054.1	V:10764365-10770008	N2	rnp-6	OK	23.5294	12.1896	-0.948814	-2.92325	5e-05	0.000725861	yes	GO:0005737; GO:0016787; GO:0005811; GO:0004806; GO:0006629; GO:0016020; GO:0016042; GO:0055088; GO:0019433; GO:0008152; GO:0042572; GO:0050253	lipid homeostasis; triglyceride lipase activity; retinyl-palmitate esterase activity; hydrolase activity; cytoplasm; lipid droplet; retinol metabolic process; metabolic process; triglyceride catabolic process; lipid metabolic process; membrane; lipid catabolic process	protein_coding
WBGene00008376	D1054.9	V:10785795-10791234	N2	rnp-6	OK	0.649406	0.244046	-1.41197	-1.56321	0.00025	0.00303907	yes			protein_coding
WBGene00043302	F32D8.11,F32D8.12	V:10887872-10891030	N2	rnp-6	OK	31.7311	54.8682	0.790075	3.09544	5e-05	0.000725861	yes			protein_coding
WBGene00009334	F32D8.11,F32D8.12	V:10887872-10891030	N2	rnp-6	OK	31.7311	54.8682	0.790075	3.09544	5e-05	0.000725861	yes	GO:0003824; GO:0050660; GO:0016614; GO:0055114; GO:0016491	catalytic activity; flavin adenine dinucleotide binding; oxidation-reduction process; oxidoreductase activity, acting on CH-OH group of donors; oxidoreductase activity	protein_coding
WBGene00009968	fig-1	V:10970357-10980774	N2	rnp-6	OK	1.26878	2.25992	0.832829	1.30405	0.0024	0.0197654	yes	; GO:0016021; GO:0016020	; integral component of membrane; membrane	protein_coding
WBGene00000981	dhs-18	V:11044066-11046895	N2	rnp-6	OK	55.4185	32.7935	-0.756957	-2.67581	5e-05	0.000725861	yes			protein_coding
WBGene00011427	T04C12.1	V:11058648-11059264	N2	rnp-6	OK	3.63545	1.01932	-1.83453	-2.22198	0.00725	0.0466777	yes	GO:0016021; GO:0016020; GO:0007165	signal transduction; integral component of membrane; membrane	protein_coding
WBGene00000065	act-3	V:11071683-11074498	N2	rnp-6	OK	91.5186	127.438	0.477655	2.13751	5e-05	0.000725861	yes	GO:0005856; GO:0005737; GO:0030866; GO:0000166; GO:0009792; GO:0000281; GO:0005865; GO:0005524	embryo development ending in birth or egg hatching; cortical actin cytoskeleton organization; cytoplasm; striated muscle thin filament; mitotic cytokinesis; ATP binding; cytoskeleton; nucleotide binding	protein_coding
WBGene00000064	act-2	V:11076736-11078168	N2	rnp-6	OK	437.86	552.729	0.336104	1.56139	0.0057	0.0388114	yes	GO:0005856; GO:0005737; GO:0000281; GO:0030866; GO:0000166; GO:0040011; GO:0009792; GO:0005938; GO:0007111; GO:0005524; GO:0005884	actin filament; embryo development ending in birth or egg hatching; cortical actin cytoskeleton organization; meiosis II cytokinesis; cytoplasm; cell cortex; mitotic cytokinesis; ATP binding; locomotion; cytoskeleton; nucleotide binding	protein_coding
WBGene00012780	Y42A5A.5	V:11107532-11109753	N2	rnp-6	OK	15.5535	7.69299	-1.01563	-2.17619	0.0005	0.00551085	yes			protein_coding
WBGene00000539	cln-3.1	V:11263521-11265650	N2	rnp-6	OK	9.29572	13.3808	0.525529	1.64731	0.00375	0.0280629	yes	GO:0005737; GO:0007034; GO:0016021; GO:0016020; GO:0005764; GO:0005765; GO:0003674; GO:0007040; GO:0051453; GO:0008340; GO:0015809; GO:0046662	regulation of oviposition; cytoplasm; molecular_function; integral component of membrane; lysosome organization; lysosomal membrane; determination of adult lifespan; membrane; lysosome; vacuolar transport; arginine transport; regulation of intracellular pH	protein_coding
WBGene00001716	grl-7	V:11344816-11347012	N2	rnp-6	OK	2.29399	1.06345	-1.1091	-1.98032	0.00095	0.00937283	yes			protein_coding
WBGene00010525	K03B8.8	V:11407522-11411019	N2	rnp-6	OK	4.14212	1.64565	-1.33171	-1.79113	0.00665	0.0436819	yes			protein_coding
WBGene00000982	dhs-19	V:11489048-11490361	N2	rnp-6	OK	65.0806	39.7621	-0.710833	-2.81391	5e-05	0.000725861	yes	GO:0016021; GO:0016020	integral component of membrane; membrane	protein_coding
WBGene00004359	rhr-2	V:11727897-11730160	N2	rnp-6	OK	3.2622	1.98334	-0.717909	-1.6541	0.0055	0.0377698	yes	GO:0006810; GO:0008519; GO:0016021; GO:0016020; GO:0072488; GO:0015695; GO:0005887; GO:0015696	integral component of plasma membrane; ammonium transmembrane transport; ammonium transmembrane transporter activity; ammonium transport; membrane; organic cation transport; integral component of membrane; transport	protein_coding
WBGene00011439	T04F3.4	V:11760670-11763067	N2	rnp-6	OK	12.7289	6.81037	-0.902298	-2.09043	0.00035	0.00407043	yes	GO:0005509	calcium ion binding	protein_coding
WBGene00008258	mans-2	V:11982620-11986115	N2	rnp-6	OK	22.4931	14.5339	-0.630062	-2.33848	5e-05	0.000725861	yes	GO:0016787; GO:0005783; GO:0006486; GO:0016021; GO:0016020; GO:0016798; GO:0000139; GO:0004571; GO:0005509; GO:0008152; GO:0006491; GO:0046872	calcium ion binding; hydrolase activity, acting on glycosyl bonds; protein glycosylation; N-glycan processing; hydrolase activity; endoplasmic reticulum; Golgi membrane; metabolic process; metal ion binding; membrane; mannosyl-oligosaccharide 1,2-alpha-mannosidase activity; integral component of membrane	protein_coding
WBGene00011090	R07B7.6	V:12072876-12074986	N2	rnp-6	OK	5.46552	3.36958	-0.697792	-1.8402	0.0013	0.0120757	yes	GO:0008375; GO:0016021; GO:0016020	acetylglucosaminyltransferase activity; integral component of membrane; membrane	protein_coding
WBGene00007548	C13C4.4	V:12109167-12110978	N2	rnp-6	OK	2.60773	1.22193	-1.09363	-2.03766	0.0009	0.00897191	yes	GO:0016311; GO:0016791	phosphatase activity; dephosphorylation	protein_coding
WBGene00009096	fipr-1	V:12358646-12363691	N2	rnp-6	OK	29.5084	12.3189	-1.26025	-1.89807	0.00185	0.016033	yes			protein_coding
WBGene00008296	cdr-2	V:12414621-12415711	N2	rnp-6	OK	45.798	29.7674	-0.62155	-2.23942	0.00015	0.00195025	yes	GO:1990170; GO:0016021; GO:0016020; GO:0060625	stress response to cadmium ion; integral component of membrane; regulation of protein deneddylation; membrane	protein_coding
WBGene00138721	C54D10.14	V:12437498-12441266	N2	rnp-6	OK	0.101365	0.433446	2.0963	2.22427	0.0004	0.00457121	yes			protein_coding
WBGene00008301	dct-3	V:12441664-12443835	N2	rnp-6	OK	0.223131	0.81975	1.87729	2.39636	0.00085	0.00858204	yes			protein_coding
WBGene00007552	C13C12.2	V:12523646-12525656	N2	rnp-6	OK	1.28273	0.508898	-1.33377	-2.17029	0.00065	0.0068644	yes			protein_coding
WBGene00009724	F45D3.4	V:12552210-12553229	N2	rnp-6	OK	150.126	107.449	-0.482516	-2.04847	0.0004	0.00457121	yes			protein_coding
WBGene00001671	gpa-9	V:12646826-12649313	N2	rnp-6	OK	0.933533	0.397028	-1.23346	-1.62836	0.00725	0.0466777	yes	GO:0007186; GO:0031683; GO:0003924; GO:0004871; GO:0019001	signal transducer activity; G-protein beta/gamma-subunit complex binding; GTPase activity; guanyl nucleotide binding; G-protein coupled receptor signaling pathway	protein_coding
WBGene00008102	C44H9.7	V:12853014-12854839	N2	rnp-6	OK	2.20044	0.804349	-1.4519	-2.48892	0.00035	0.00407043	yes	; GO:0016021; GO:0016020	; integral component of membrane; membrane	protein_coding
WBGene00011800	T16G1.6	V:12935535-12937187	N2	rnp-6	OK	71.4012	46.866	-0.607405	-2.52983	5e-05	0.000725861	yes			protein_coding
WBGene00011798	T16G1.4	V:12940037-12941847	N2	rnp-6	OK	9.25896	6.37402	-0.538647	-1.57342	0.00655	0.043217	yes			protein_coding
WBGene00011802	T16G1.9	V:12944860-12950658	N2	rnp-6	OK	23.0034	16.7484	-0.45782	-1.86524	0.0012	0.0113201	yes	GO:0005515	protein binding	protein_coding
WBGene00001387	far-3	V:12995600-12997524	N2	rnp-6	OK	284.49	574.357	1.01357	4.59958	5e-05	0.000725861	yes	GO:0008289	lipid binding	protein_coding
WBGene00219208	B0365.9	V:13131925-13133535	N2	rnp-6	OK	3.30942	1.35799	-1.28511	-2.28754	0.0008	0.00816818	yes			protein_coding
WBGene00007153	clec-41	V:13134964-13138086	N2	rnp-6	OK	55.1496	86.208	0.644471	2.84615	5e-05	0.000725861	yes	GO:0045087; GO:0030246	innate immune response; carbohydrate binding	protein_coding
WBGene00000732	col-159	V:13198229-13199315	N2	rnp-6	OK	12.3912	32.6323	1.39699	4.50841	5e-05	0.000725861	yes	GO:0016021; GO:0016020; GO:0005581; GO:0042302	structural constituent of cuticle; collagen trimer; integral component of membrane; membrane	protein_coding
WBGene00000733	col-160	V:13200981-13202189	N2	rnp-6	OK	143.714	274.237	0.932217	3.99958	5e-05	0.000725861	yes	GO:0016021; GO:0016020; GO:0005581; GO:0042302	structural constituent of cuticle; collagen trimer; integral component of membrane; membrane	protein_coding
WBGene00000734	col-161	V:13317031-13318010	N2	rnp-6	OK	0.252745	0.92052	1.86477	1.93984	0.007	0.0454744	yes	GO:0016021; GO:0016020; GO:0005581; GO:0042302	structural constituent of cuticle; collagen trimer; integral component of membrane; membrane	protein_coding
WBGene00008341	ttr-44	V:13523529-13530744	N2	rnp-6	OK	4.8148	10.0508	1.06175	1.9424	0.0013	0.0120757	yes	GO:0005615	extracellular space	protein_coding
WBGene00010426	H37A05.2	V:13629838-13634220	N2	rnp-6	OK	1.04922	2.06754	0.978604	1.85896	0.00115	0.01096	yes			protein_coding
WBGene00006442	tag-65	V:13675987-13678599	N2	rnp-6	OK	33.0884	25.6022	-0.370062	-1.51354	0.00785	0.0494531	yes	GO:0003676	nucleic acid binding	protein_coding
WBGene00009431	dct-17	V:13727760-13730776	N2	rnp-6	OK	44.805	12.1213	-1.88612	-6.84295	5e-05	0.000725861	yes	GO:0050829; ; GO:0045087; GO:0045121	; innate immune response; membrane raft; defense response to Gram-negative bacterium	protein_coding
WBGene00009429	F35E12.5	V:13737006-13738471	N2	rnp-6	OK	91.3362	26.9285	-1.76205	-6.51985	5e-05	0.000725861	yes	GO:0050829; GO:0045087; GO:0045121; GO:0050830	innate immune response; defense response to Gram-positive bacterium; membrane raft; defense response to Gram-negative bacterium	protein_coding
WBGene00009432	cld-9	V:13749184-13751921	N2	rnp-6	OK	15.4531	7.56044	-1.03135	-2.6306	5e-05	0.000725861	yes	GO:0050829; ; GO:0045087; GO:0045121	; innate immune response; membrane raft; defense response to Gram-negative bacterium	protein_coding
WBGene00008985	F20G2.1	V:13752266-13753564	N2	rnp-6	OK	2.93553	9.18851	1.64621	3.80069	5e-05	0.000725861	yes			protein_coding
WBGene00077570	F55B12.11	V:13825612-13827051	N2	rnp-6	OK	1.62517	0.57695	-1.49407	-2.28319	0.00075	0.00772691	yes
WBGene00007365	C06B3.6	V:13908127-13909513	N2	rnp-6	OK	84.5876	60.7254	-0.478145	-1.80732	0.0012	0.0113201	yes			protein_coding
WBGene00003474	mtl-2	V:14018271-14018643	N2	rnp-6	OK	228.324	113.051	-1.01411	-3.45543	5e-05	0.000725861	yes	GO:0046872	metal ion binding	protein_coding
WBGene00008392	D1086.5	V:14088892-14090323	N2	rnp-6	OK	14.3885	7.62819	-0.915508	-2.44361	0.00015	0.00195025	yes			protein_coding
WBGene00009805	F47B8.4	V:14323531-14324631	N2	rnp-6	OK	2.22631	1.08842	-1.03241	-1.7798	0.00265	0.0213265	yes	GO:0045087; GO:0005623; GO:0045454; GO:0015035; GO:0055114; GO:0009055	innate immune response; electron transfer activity; cell; protein disulfide oxidoreductase activity; oxidation-reduction process; cell redox homeostasis	protein_coding
WBGene00044961	F56A12.5	V:14361927-14362035	N2	rnp-6	OK	24.6853	0	-inf		0.00685	0.0447412	yes
WBGene00008263	C53A5.2	V:14522727-14523177	N2	rnp-6	OK	4.96633	1.46094	-1.76529	-2.08997	0.00275	0.0219448	yes			protein_coding
WBGene00003982	pes-9	V:14595267-14597067	N2	rnp-6	OK	106.171	135.608	0.35306	1.6091	0.0046	0.032894	yes	GO:0016787; GO:0016805; GO:0008237; GO:0008152; GO:0006508	metabolic process; hydrolase activity; proteolysis; dipeptidase activity; metallopeptidase activity	protein_coding
WBGene00009651	F43D2.2	V:14635581-14637751	N2	rnp-6	OK	14.6725	8.52329	-0.78363	-2.49111	5e-05	0.000725861	yes
WBGene00008183	rin-1	V:14784151-14815600	N2	rnp-6	OK	20.7783	28.4766	0.454699	1.98843	0.0005	0.00551085	yes	GO:0005737; ; GO:0033563; GO:0030175; GO:0051020; GO:0071944; GO:0001764	dorsal/ventral axon guidance; GTPase binding; ; cytoplasm; cell periphery; filopodium; neuron migration	protein_coding
WBGene00001150	ech-1.1	V:15357695-15360738	N2	rnp-6	OK	8.83653	22.9094	1.37439	5.04769	5e-05	0.000725861	yes	GO:0006631; GO:0016507; GO:0006635; GO:0004300; GO:0005739; GO:0003824; GO:0008152; GO:0003857; GO:0055114; GO:0016491	3-hydroxyacyl-CoA dehydrogenase activity; catalytic activity; fatty acid metabolic process; oxidoreductase activity; mitochondrial fatty acid beta-oxidation multienzyme complex; metabolic process; fatty acid beta-oxidation; oxidation-reduction process; enoyl-CoA hydratase activity; mitochondrion	protein_coding
WBGene00007368	C06B8.2	V:15471334-15478566	N2	rnp-6	OK	3.83357	1.38171	-1.47223	-2.31803	0.0007	0.00728567	yes			protein_coding
WBGene00077444	F54B8.17	V:15811509-15812118	N2	rnp-6	OK	0.492008	0	-inf		5e-05	0.000725861	yes
WBGene00044660	fbxa-87	V:16128130-16129089	N2	rnp-6	OK	1.50701	2.79391	0.890601	1.66523	0.0037	0.027775	yes
WBGene00011753	T13F3.6	V:16270215-16271221	N2	rnp-6	OK	21.3967	13.2492	-0.691483	-1.93762	0.00085	0.00858204	yes			protein_coding
WBGene00000776	cpl-1	V:16592570-16595346	N2	rnp-6	OK	799.667	1129.99	0.498837	2.2843	0.00015	0.00195025	yes	GO:0016787; GO:0031983; GO:0005615; GO:0051603; GO:0042718; GO:0005764; GO:0004197; GO:0005515; GO:0006508; GO:0008233; GO:0008234	extracellular space; lysosome; hydrolase activity; protein binding; vesicle lumen; peptidase activity; cysteine-type endopeptidase activity; yolk granule; proteolysis involved in cellular protein catabolic process; proteolysis; cysteine-type peptidase activity	protein_coding
WBGene00045356	T03E6.8,T03E6.9	V:16598988-16603369	N2	rnp-6	OK	0.430812	0.980094	1.18586	1.95394	0.001	0.0097769	yes	GO:0016021; GO:0016020; GO:0050907	detection of chemical stimulus involved in sensory perception; integral component of membrane; membrane	protein_coding
WBGene00011397	T03E6.8,T03E6.9	V:16598988-16603369	N2	rnp-6	OK	0.430812	0.980094	1.18586	1.95394	0.001	0.0097769	yes	GO:0016021; GO:0016020; GO:0050907	detection of chemical stimulus involved in sensory perception; integral component of membrane; membrane	protein_coding
WBGene00194769	Y32B12C.5	V:16603528-16610952	N2	rnp-6	OK	0.476377	1.20477	1.33858	1.9295	0.00555	0.0380172	yes
WBGene00050904	Y70C5A.3	V:16618347-16620908	N2	rnp-6	OK	0.324994	1.05624	1.70045	2.92547	5e-05	0.000725861	yes	GO:0005515	protein binding	protein_coding
WBGene00003702	nhr-112	V:16722060-16723844	N2	rnp-6	OK	2.1707	3.66629	0.756159	1.66862	0.00375	0.0280629	yes	GO:0043565; GO:0003700; GO:0005634; GO:0006355; GO:0008270; GO:0043401; GO:0003677; GO:0050829; GO:0046872; GO:0045087; GO:0006351	innate immune response; steroid hormone mediated signaling pathway; regulation of transcription, DNA-templated; DNA binding; zinc ion binding; nucleus; metal ion binding; sequence-specific DNA binding; transcription, DNA-templated; defense response to Gram-negative bacterium; DNA binding transcription factor activity	protein_coding
WBGene00006585	tni-3	V:16833315-16839071	N2	rnp-6	OK	12.0997	17.4617	0.529221	1.59	0.00545	0.0375212	yes	GO:0030016; GO:0018991; GO:0006936; GO:0003779; GO:0030017; GO:0030172; GO:0040032; GO:0046872; GO:0005861	post-embryonic body morphogenesis; actin binding; troponin complex; muscle contraction; oviposition; metal ion binding; sarcomere; troponin C binding; myofibril	protein_coding
WBGene00011487	T05E12.6	V:17084998-17090023	N2	rnp-6	OK	25.662	66.6828	1.37768	5.65033	5e-05	0.000725861	yes			protein_coding
WBGene00009295	fbxa-180	V:17319595-17322444	N2	rnp-6	OK	0.772194	1.43147	0.890462	1.82629	0.00255	0.0206975	yes
WBGene00012404	Y6G8.2	V:17594348-17598930	N2	rnp-6	OK	0.533958	0.995275	0.898367	1.75372	0.0024	0.0197654	yes	GO:0005515	protein binding	protein_coding
WBGene00008127	ddo-1	V:17774244-17777229	N2	rnp-6	OK	9.26324	3.74292	-1.30735	-3.25136	5e-05	0.000725861	yes	GO:0008445; GO:0005777; GO:0003884; GO:0048037; GO:0055114; GO:0047821; GO:0046416; GO:0071949; GO:0016491	cofactor binding; D-amino acid metabolic process; D-amino-acid oxidase activity; FAD binding; oxidoreductase activity; oxidation-reduction process; peroxisome; D-aspartate oxidase activity; D-glutamate oxidase activity	protein_coding
WBGene00001080	dpy-21	V:17936331-17949028	N2	rnp-6	OK	12.6276	16.261	0.364838	1.53363	0.00605	0.0406593	yes	GO:0005634; GO:0000805; GO:0005694	X chromosome; nucleus; chromosome	protein_coding
WBGene00219210	Y37H2A.18	V:18131552-18133232	N2	rnp-6	OK	3.33811	6.05083	0.858101	1.97658	0.0006	0.00643061	yes	GO:0005515	protein binding	protein_coding
WBGene00011207	R10E8.1	V:18242322-18252416	N2	rnp-6	OK	3.79791	6.02218	0.665082	1.86847	0.00135	0.0124346	yes			protein_coding
WBGene00194695	B0462.5	V:18322214-18323327	N2	rnp-6	OK	0.559266	4.098	2.87331	4.03792	5e-05	0.000725861	yes			protein_coding
WBGene00013079	ttr-26	V:18558734-18560306	N2	rnp-6	OK	7.73493	18.1201	1.22813	3.13523	5e-05	0.000725861	yes	GO:0005615	extracellular space	protein_coding
WBGene00013481	Y69H2.3	V:18650342-18664116	N2	rnp-6	OK	42.8448	57.9318	0.435234	1.80101	0.002	0.017068	yes	; GO:0005515	; protein binding	protein_coding
WBGene00012452	Y17D7B.4	V:18776198-18780216	N2	rnp-6	OK	34.0101	23.9195	-0.507781	-1.56064	0.00725	0.0466777	yes			protein_coding
WBGene00014562	Y17D7B.7	V:18780489-18782605	N2	rnp-6	OK	7.30608	12.3569	0.758143	1.6168	0.0052	0.0361513	yes
WBGene00001258	emb-4	V:18860287-18894974	N2	rnp-6	OK	48.9974	68.5778	0.485035	2.1899	5e-05	0.000725861	yes	; GO:0005634; GO:0005681; GO:0000398	; mRNA splicing, via spliceosome; nucleus; spliceosomal complex	protein_coding
WBGene00013587	Y80D3A.9	V:18953136-18957306	N2	rnp-6	OK	14.7214	6.59735	-1.15796	-3.10174	5e-05	0.000725861	yes			protein_coding
WBGene00012683	asp-17	V:19035714-19037320	N2	rnp-6	OK	3.08288	6.18728	1.00503	2.49798	5e-05	0.000725861	yes	GO:0016787; GO:0008233; GO:0004190; GO:0030163; GO:0006508	hydrolase activity; peptidase activity; proteolysis; aspartic-type endopeptidase activity; protein catabolic process	protein_coding
WBGene00003669	nhr-79	V:19207683-19211888	N2	rnp-6	OK	7.09793	4.35138	-0.705923	-1.9494	0.00135	0.0124346	yes	GO:0043565; GO:0003700; GO:0005634; GO:0006355; GO:0008270; GO:0043401; GO:0003677; GO:0046872; GO:0006351	steroid hormone mediated signaling pathway; regulation of transcription, DNA-templated; DNA binding; zinc ion binding; nucleus; metal ion binding; sequence-specific DNA binding; transcription, DNA-templated; DNA binding transcription factor activity	protein_coding
WBGene00010105	fbxb-62	V:19301075-19302030	N2	rnp-6	OK	3.95837	2.24381	-0.818956	-1.6721	0.0066	0.0434415	yes	GO:0005515	protein binding	protein_coding
WBGene00012811	Y43F8A.5	V:19384886-19390120	N2	rnp-6	OK	0.441628	0.894366	1.01803	1.6309	0.00665	0.0436819	yes	GO:0016021; GO:0016020	integral component of membrane; membrane	protein_coding
WBGene00012812	Y43F8B.1	V:19534884-19546200	N2	rnp-6	OK	17.9067	24.5018	0.452392	1.55598	0.0072	0.0464409	yes			protein_coding
WBGene00012251	clec-49	V:19748986-19751212	N2	rnp-6	OK	42.7904	30.0229	-0.511224	-1.87866	0.00115	0.01096	yes	GO:0030246; GO:0004888; GO:0005576; GO:0048029; GO:0005887; GO:0007165	carbohydrate binding; transmembrane signaling receptor activity; extracellular region; signal transduction; integral component of plasma membrane; monosaccharide binding	protein_coding
WBGene00001629	gly-4	V:19881371-19895350	N2	rnp-6	OK	30.0313	22.992	-0.385333	-1.54291	0.0073	0.0469136	yes	; GO:0005794; GO:0006486; GO:0016021; GO:0016020; GO:0004653; GO:0030246; GO:0000139; GO:0016740; GO:0018243; GO:0016757; GO:0046872	transferase activity, transferring glycosyl groups; protein O-linked glycosylation via threonine; carbohydrate binding; Golgi apparatus; transferase activity; Golgi membrane; polypeptide N-acetylgalactosaminyltransferase activity; protein glycosylation; metal ion binding; membrane; integral component of membrane;	protein_coding
WBGene00008944	F19B2.5	V:20162647-20163732	N2	rnp-6	OK	107.785	56.4892	-0.932112	-3.55194	5e-05	0.000725861	yes	GO:0005524	ATP binding	protein_coding
WBGene00013762	Y113G7B.12	V:20208683-20212451	N2	rnp-6	OK	2.07959	1.32037	-0.65536	-1.65862	0.00545	0.0375212	yes			protein_coding
WBGene00004203	swsn-1	V:20239243-20249484	N2	rnp-6	OK	27.1049	38.6271	0.511058	2.16328	0.00035	0.00407043	yes	GO:0040010; GO:0040027; GO:0000003; GO:0006338; GO:0006357; GO:0040018; GO:0005634; GO:0002119; GO:0035262; GO:0009792; GO:0042802; GO:0005515; GO:0003677; GO:0090544; GO:0040035; GO:0046662; GO:0002009	positive regulation of multicellular organism growth; nematode larval development; embryo development ending in birth or egg hatching; positive regulation of growth rate; regulation of oviposition; protein binding; DNA binding; hermaphrodite genitalia development; identical protein binding; BAF-type complex; nucleus; gonad morphogenesis; reproduction; regulation of transcription from RNA polymera…	protein_coding
WBGene00012622	Y38H6C.9	V:20520253-20522284	N2	rnp-6	OK	0.754992	1.94772	1.36726	2.08967	0.00015	0.00195025	yes			protein_coding
WBGene00012631	Y38H6C.19	V:20552299-20553053	N2	rnp-6	OK	0.773285	3.05371	1.98149	2.8336	0.00015	0.00195025	yes			protein_coding
WBGene00012634	Y38H6C.23	V:20555628-20556238	N2	rnp-6	OK	3.15224	11.1898	1.82773	3.23316	5e-05	0.000725861	yes			protein_coding
WBGene00086569	F38A6.5	V:20772535-20773736	N2	rnp-6	OK	7.70138	4.3373	-0.82832	-1.82446	0.002	0.017068	yes			protein_coding
WBGene00000608	col-19	X:421706-422776	N2	rnp-6	OK	355.207	574.987	0.69487	3.12915	5e-05	0.000725861	yes	GO:0040002; GO:0060111; GO:0005581; GO:0042329; GO:0042338; GO:0005576; GO:0060102; GO:0042302; GO:0060107	alae of collagen and cuticulin-based cuticle extracellular matrix; collagen and cuticulin-based cuticle development; cuticle development involved in collagen and cuticulin-based cuticle molting cycle; annuli extracellular matrix; extracellular region; collagen and cuticulin-based cuticle extracellular matrix; structural constituent of collagen and cuticulin-based cuticle; structural constituent o…	protein_coding
WBGene00020571	lpr-7	X:656187-658514	N2	rnp-6	OK	1.07044	0.340469	-1.6526	-2.07523	0.00325	0.0250162	yes	GO:0016021; GO:0016020; GO:0044765; GO:0005576	extracellular region; single-organism transport; integral component of membrane; membrane	protein_coding
WBGene00020218	T04G9.7	X:770834-771969	N2	rnp-6	OK	208.583	161.1	-0.372661	-1.55564	0.0064	0.0424098	yes			protein_coding
WBGene00023069	rncs-1	X:1011500-1012347	N2	rnp-6	OK	13.2838	4.94555	-1.42546	-3.56432	5e-05	0.000725861	yes
WBGene00018853	sec-22	X:1035547-1038447	N2	rnp-6	OK	22.9662	15.4278	-0.573985	-1.74732	0.0029	0.0228734	yes	GO:0006810; GO:0006888; GO:0016192; GO:0016021; GO:0016020; GO:0048280; GO:0000149; GO:0005484; GO:0031201	ER to Golgi vesicle-mediated transport; SNARE complex; vesicle fusion with Golgi apparatus; SNAP receptor activity; vesicle-mediated transport; SNARE binding; membrane; integral component of membrane; transport	protein_coding
WBGene00015471	lmp-2	X:1125169-1128288	N2	rnp-6	OK	21.2135	12.7682	-0.732424	-2.2795	0.0002	0.00250605	yes	GO:0016021; GO:0016020	integral component of membrane; membrane	protein_coding
WBGene00019272	H42K12.3	X:1311604-1316636	N2	rnp-6	OK	4.90035	3.01936	-0.698641	-1.7124	0.00395	0.0292687	yes	GO:0042335; GO:0002064	epithelial cell development; cuticle development	protein_coding
WBGene00195185	F19G12.9	X:1419619-1420181	N2	rnp-6	OK	15.3692	8.48936	-0.856313	-1.61754	0.0071	0.0459858	yes			protein_coding
WBGene00016995	acly-1	X:1479541-1484398	N2	rnp-6	OK	20.4196	27.4232	0.425443	1.81243	0.0009	0.00897191	yes	GO:0005737; GO:0006633; GO:0046912; GO:0006629; GO:0006085; GO:0005829; GO:0003878; GO:0000166; GO:0003824; GO:0016740; GO:0048037; GO:0008152; GO:0006101; GO:0046872; GO:0009346; GO:0005524	cofactor binding; catalytic activity; ATP citrate synthase activity; cytosol; transferase activity; transferase activity, transferring acyl groups, acyl groups converted into alkyl on transfer; fatty acid biosynthetic process; metabolic process; acetyl-CoA biosynthetic process; citrate lyase complex; ATP binding; lipid metabolic process; cytoplasm; citrate metabolic process; nucleotide binding; m…	protein_coding
WBGene00019187	H11E01.2	X:1621480-1625288	N2	rnp-6	OK	3.6756	2.13574	-0.783247	-1.8455	0.00225	0.0187814	yes	GO:0022857; GO:0016021; GO:0016020; GO:0006820; GO:0055085	anion transport; transmembrane transport; transmembrane transporter activity; integral component of membrane; membrane	protein_coding
WBGene00022413	Y102A11A.3	X:2019169-2025737	N2	rnp-6	OK	21.7064	13.3881	-0.697169	-2.97955	5e-05	0.000725861	yes			protein_coding
WBGene00003087	lsy-2	X:2089665-2093246	N2	rnp-6	OK	18.8159	27.7656	0.561346	2.07482	0.0001	0.00135972	yes	GO:0003676	nucleic acid binding	protein_coding
WBGene00020509	hex-1	X:2223483-2226620	N2	rnp-6	OK	31.5275	20.2288	-0.640198	-2.47225	5e-05	0.000725861	yes	GO:0016787; GO:0005975; GO:0016798; GO:0015929; GO:0005575; GO:0004563; GO:0005764; GO:0008152; GO:0004553	hydrolase activity, acting on glycosyl bonds; hydrolase activity, hydrolyzing O-glycosyl compounds; hydrolase activity; beta-N-acetylhexosaminidase activity; hexosaminidase activity; carbohydrate metabolic process; cellular_component; metabolic process; lysosome	protein_coding
WBGene00020507	vha-15	X:2237910-2240254	N2	rnp-6	OK	80.3742	60.6165	-0.40702	-1.79073	0.00175	0.015327	yes	GO:0016820; GO:0015992; GO:0007035; GO:0006811; GO:0006810; GO:0005765; GO:0000221; GO:0005488; GO:0046961; GO:0015991	binding; vacuolar proton-transporting V-type ATPase, V1 domain; proton transport; ion transport; lysosomal membrane; proton-transporting ATPase activity, rotational mechanism; hydrolase activity, acting on acid anhydrides, catalyzing transmembrane movement of substances; ATP hydrolysis coupled proton transport; vacuolar acidification; transport	protein_coding
WBGene00016617	C43H6.4	X:2404023-2407360	N2	rnp-6	OK	9.39543	6.1047	-0.622038	-1.99945	0.0009	0.00897191	yes	GO:0005488	binding	protein_coding
WBGene00020194	T03G6.1	X:2608227-2609989	N2	rnp-6	OK	6.72031	3.20735	-1.06714	-2.54452	5e-05	0.000725861	yes			protein_coding
WBGene00015748	C14A11.2	X:2803111-2804830	N2	rnp-6	OK	1.8348	0.773164	-1.24677	-1.97631	0.0012	0.0113201	yes			protein_coding
WBGene00006632	tsp-6	X:2820447-2822027	N2	rnp-6	OK	1.34518	0.434622	-1.62997	-1.87084	0.00675	0.0441976	yes	GO:0016021; GO:0016020; GO:0005887; GO:0007166	integral component of plasma membrane; integral component of membrane; cell surface receptor signaling pathway; membrane	protein_coding
WBGene00018744	F53B3.6	X:2864290-2865683	N2	rnp-6	OK	0.895533	1.9811	1.14549	2.12321	0.00045	0.00504819	yes			protein_coding
WBGene00000175	aqp-7	X:3025061-3026971	N2	rnp-6	OK	40.4658	60.4738	0.579604	2.31429	5e-05	0.000725861	yes	GO:0006810; GO:0005215; GO:0016021; GO:0016020; GO:0015250; GO:0006833; GO:0015793; GO:0022838; GO:0055085	transporter activity; integral component of membrane; water transport; glycerol transport; water channel activity; membrane; substrate-specific channel activity; transmembrane transport; transport	protein_coding
WBGene00019738	clec-265	X:3031722-3033203	N2	rnp-6	OK	18.7726	31.2362	0.734592	2.58276	5e-05	0.000725861	yes	GO:0030246	carbohydrate binding	protein_coding
WBGene00018701	pccb-1	X:3089495-3094372	N2	rnp-6	OK	63.7533	84.9293	0.413762	1.82255	0.0016	0.014229	yes	GO:0009062; GO:0016874; GO:0016421	fatty acid catabolic process; CoA carboxylase activity; ligase activity	protein_coding
WBGene00001620	glt-1	X:3496025-3499165	N2	rnp-6	OK	18.8178	25.7492	0.452429	1.71904	0.00265	0.0213265	yes	GO:0089711; GO:0006810; GO:0005313; GO:0015293; GO:0016021; GO:0016020; GO:0005886; GO:0042995; GO:0055085	L-glutamate transmembrane transporter activity; symporter activity; integral component of membrane; L-glutamate transmembrane transport; plasma membrane; membrane; cell projection; transmembrane transport; transport	protein_coding
WBGene00006863	gyg-1	X:3537640-3540940	N2	rnp-6	OK	9.73418	14.0461	0.529043	1.62679	0.00485	0.0342461	yes	GO:0005737; GO:0005978; GO:0016740; GO:0055120; GO:0016757; GO:0046872; GO:0008466	transferase activity, transferring glycosyl groups; glycogenin glucosyltransferase activity; transferase activity; striated muscle dense body; metal ion binding; cytoplasm; glycogen biosynthetic process	protein_coding
WBGene00044725	R11G1.7	X:3656269-3657328	N2	rnp-6	OK	11.6436	6.84513	-0.766387	-1.64957	0.0041	0.0300971	yes			protein_coding
WBGene00018024	F35A5.1	X:3807465-3816434	N2	rnp-6	OK	1.40296	2.1969	0.646997	1.99886	0.00045	0.00504819	yes	GO:0005883; GO:0061564	neurofilament; axon development	protein_coding
WBGene00020567	T19D2.1	X:3931769-3937881	N2	rnp-6	OK	0.573734	0.967938	0.754533	1.56705	0.0072	0.0464409	yes	GO:0006508; GO:0046872; GO:0004222; GO:0008237	metallopeptidase activity; proteolysis; metalloendopeptidase activity; metal ion binding	protein_coding
WBGene00006921	vha-12	X:4191093-4193135	N2	rnp-6	OK	142.379	106.263	-0.422105	-1.9358	0.0006	0.00643061	yes	GO:0016787; GO:0016820; GO:0016337; GO:0015991; GO:0046034; GO:0006811; GO:0006810; GO:0015988; GO:0005623; GO:0033180; GO:0046961; GO:0060142; GO:0051453; GO:0015992; GO:0008219; GO:0001666; GO:0043068; GO:0005524	cell; response to hypoxia; hydrolase activity; energy coupled proton transmembrane transport, against electrochemical gradient; positive regulation of programmed cell death; proton transport; ion transport; ATP metabolic process; regulation of syncytium formation by plasma membrane fusion; single organismal cell-cell adhesion; cell death; ATP binding; proton-transporting ATPase activity, rotation…	protein_coding
WBGene00000738	col-165	X:4353617-4354811	N2	rnp-6	OK	7.6599	4.66985	-0.713948	-1.76277	0.0025	0.0203879	yes	GO:0016021; GO:0016020; GO:0005581; GO:0042302	structural constituent of cuticle; collagen trimer; integral component of membrane; membrane	protein_coding
WBGene00019344	dhhc-10	X:4707187-4709812	N2	rnp-6	OK	14.4299	8.30852	-0.796403	-2.40509	0.0001	0.00135972	yes	GO:0016021; GO:0016020; GO:0016740; GO:0016746; GO:0008270; GO:0019706	protein-cysteine S-palmitoyltransferase activity; transferase activity; zinc ion binding; transferase activity, transferring acyl groups; membrane; integral component of membrane	protein_coding
WBGene00019958	R08E3.2	X:4822658-4824680	N2	rnp-6	OK	51.4649	36.6966	-0.487944	-1.86766	0.00125	0.0117015	yes
WBGene00022500	lfi-1	X:4972559-4997598	N2	rnp-6	OK	28.9855	39.3244	0.440094	1.96807	0.00065	0.0068644	yes	GO:0005634; GO:0005828	nucleus; kinetochore microtubule	protein_coding
WBGene00022612	ZC449.2	X:5021214-5024256	N2	rnp-6	OK	1.74951	0.505356	-1.79158	-2.98432	5e-05	0.000725861	yes	GO:0042335; GO:0002064	epithelial cell development; cuticle development	protein_coding
WBGene00022611	ZC449.1	X:5024419-5028138	N2	rnp-6	OK	0.90473	0.136694	-2.72654	-3.12749	0.00055	0.00597832	yes	GO:0042335; GO:0002064	epithelial cell development; cuticle development	protein_coding
WBGene00021325	Y34B4A.9	X:5255193-5256858	N2	rnp-6	OK	207.896	122.488	-0.763218	-3.31279	5e-05	0.000725861	yes			protein_coding
WBGene00044569	C25F6.8	X:5448269-5449968	N2	rnp-6	OK	1.39509	3.04261	1.12496	1.74566	0.00315	0.0244316	yes			protein_coding
WBGene00044623	bus-8	X:5492975-5496000	N2	rnp-6	OK	1.22317	0.535808	-1.19084	-2.11203	0.00075	0.00772691	yes	GO:0006490; GO:0097502; GO:0005789; GO:0016740; GO:0033577; GO:0000033	endoplasmic reticulum membrane; oligosaccharide-lipid intermediate biosynthetic process; protein glycosylation in endoplasmic reticulum; mannosylation; transferase activity; alpha-1,3-mannosyltransferase activity	protein_coding
WBGene00017716	F22F4.1	X:6004482-6007043	N2	rnp-6	OK	1.82933	0.571786	-1.67777	-3.11518	5e-05	0.000725861	yes			protein_coding
WBGene00020330	T07H6.1	X:6300139-6305218	N2	rnp-6	OK	0.683127	0.202474	-1.75441	-1.97977	0.00085	0.00858204	yes	GO:0016787; GO:0016021; GO:0016020; GO:0052689; GO:0008152	metabolic process; hydrolase activity; carboxylic ester hydrolase activity; integral component of membrane; membrane	protein_coding
WBGene00020691	igdb-3	X:6385484-6387863	N2	rnp-6	OK	0.729353	0.31605	-1.20646	-1.73728	0.0061	0.040891	yes	GO:0005515	protein binding	protein_coding
WBGene00015788	C15B12.8	X:6474273-6476780	N2	rnp-6	OK	3.27183	1.6181	-1.0158	-2.23786	0.0005	0.00551085	yes	GO:0055114; GO:0016491	oxidation-reduction process; oxidoreductase activity	protein_coding
WBGene00017154	ugt-57	X:6991658-6994159	N2	rnp-6	OK	2.08201	1.16856	-0.833249	-1.70728	0.00445	0.0321073	yes	GO:0008152; GO:0016021; GO:0016020; GO:0016740; GO:0016757; GO:0016758; GO:0015020; GO:0043231	transferase activity, transferring glycosyl groups; transferase activity; membrane; transferase activity, transferring hexosyl groups; metabolic process; glucuronosyltransferase activity; intracellular membrane-bounded organelle; integral component of membrane	protein_coding
WBGene00001025	dnj-7	X:7194563-7198279	N2	rnp-6	OK	33.0233	23.2256	-0.50777	-2.02117	0.00025	0.00303907	yes	GO:0006469; GO:0030968; GO:0005788; GO:0004860; GO:0051787; GO:0005515	misfolded protein binding; protein binding; endoplasmic reticulum unfolded protein response; negative regulation of protein kinase activity; endoplasmic reticulum lumen; protein kinase inhibitor activity	protein_coding
WBGene00044283	spp-22	X:7211706-7213955	N2	rnp-6	OK	11.2465	3.95974	-1.506	-3.05699	5e-05	0.000725861	yes			protein_coding
WBGene00001914	his-40	X:7310109-7310580	N2	rnp-6	OK	393.797	305.385	-0.366823	-1.60371	0.00545	0.0375212	yes	GO:0005634; GO:0003677; GO:0031492; GO:0000786; GO:0046982; GO:0005694; GO:0006334	nucleosome; DNA binding; protein heterodimerization activity; nucleosome assembly; nucleus; nucleosomal DNA binding; chromosome	protein_coding
WBGene00050957	C10A4.10	X:7398967-7400858	N2	rnp-6	OK	9.82739	4.78656	-1.03782	-2.57474	0.0001	0.00135972	yes	GO:0016021; GO:0016020	integral component of membrane; membrane	protein_coding
WBGene00018485	F46C8.3	X:7525568-7527433	N2	rnp-6	OK	9.94597	6.49233	-0.615376	-1.5651	0.0079	0.0496976	yes	GO:0016021; GO:0016020	integral component of membrane; membrane	protein_coding
WBGene00006063	sto-1	X:7562836-7564812	N2	rnp-6	OK	23.048	16.8651	-0.450599	-1.56686	0.0059	0.0398386	yes	GO:0016021; GO:0016020	integral component of membrane; membrane	protein_coding
WBGene00016657	C44E12.1	X:7596926-7599826	N2	rnp-6	OK	8.63491	4.13303	-1.06298	-2.76866	5e-05	0.000725861	yes	GO:0016787; GO:0008152	metabolic process; hydrolase activity	protein_coding
WBGene00017861	F27D9.2	X:7672992-7676281	N2	rnp-6	OK	12.1258	8.68722	-0.481108	-1.54545	0.00745	0.0476127	yes	GO:0016021; GO:0016020; GO:0055085	transmembrane transport; integral component of membrane; membrane	protein_coding
WBGene00006925	vit-1	X:7727900-7733308	N2	rnp-6	OK	205.343	133.932	-0.616536	-2.76393	5e-05	0.000725861	yes	GO:0005319; GO:0005576; GO:0045735; GO:0006869	extracellular region; lipid transport; nutrient reservoir activity; lipid transporter activity	protein_coding
WBGene00019779	M60.2	X:8242055-8247882	N2	rnp-6	OK	297.642	187	-0.670538	-3.06911	5e-05	0.000725861	yes	GO:0050829; GO:0090305; GO:0045087; GO:0016788; GO:0004519	innate immune response; hydrolase activity, acting on ester bonds; endonuclease activity; defense response to Gram-negative bacterium; nucleic acid phosphodiester bond hydrolysis	protein_coding
WBGene00017258	F08F1.4	X:8411697-8416919	N2	rnp-6	OK	14.1885	7.88027	-0.848405	-1.60384	0.0066	0.0434415	yes			protein_coding
WBGene00019148	H03E18.1	X:8507875-8517830	N2	rnp-6	OK	1.48804	0.741718	-1.00447	-2.18957	0.00085	0.00858204	yes	GO:0042335; GO:0002064	epithelial cell development; cuticle development	protein_coding
WBGene00018725	kreg-1	X:8709704-8710157	N2	rnp-6	OK	4.10587	12.0807	1.55694	3.07371	5e-05	0.000725861	yes	GO:1990169	stress response to copper ion	protein_coding
WBGene00019727	M02D8.1	X:8763908-8766287	N2	rnp-6	OK	38.9676	54.2447	0.477205	1.75776	0.00185	0.016033	yes	GO:0030017; GO:0055120; GO:0005783; GO:0005515	sarcomere; protein binding; striated muscle dense body; endoplasmic reticulum	protein_coding
WBGene00006764	unc-27	X:8789453-8790621	N2	rnp-6	OK	271.933	389.977	0.520139	2.41031	5e-05	0.000725861	yes	GO:0040011; GO:0006936; GO:0003779; GO:0030017; GO:0045214; GO:0030172; GO:0046872; GO:0005861	actin binding; troponin complex; muscle contraction; metal ion binding; sarcomere; locomotion; troponin C binding; sarcomere organization	protein_coding
WBGene00006477	chup-1	X:8792159-8796094	N2	rnp-6	OK	6.11146	4.1212	-0.568453	-1.707	0.00265	0.0213265	yes	GO:0005794; GO:0033227; GO:0015485; GO:0031410; GO:0016021; GO:0016020; GO:0005764; GO:0051033; GO:0070508; GO:0005886; GO:0005768	dsRNA transport; endosome; RNA transmembrane transporter activity; cholesterol binding; Golgi apparatus; lysosome; cholesterol import; cytoplasmic vesicle; membrane; integral component of membrane; plasma membrane	protein_coding
WBGene00019869	R04E5.2	X:8812156-8816831	N2	rnp-6	OK	3.87046	2.24641	-0.784884	-2.12741	0.00035	0.00407043	yes	GO:0006810; GO:0016021; GO:0016020; GO:0005886; GO:0008340; GO:1905516; GO:0006811	plasma membrane; ion transport; determination of adult lifespan; membrane; positive regulation of fertilization; integral component of membrane; transport	protein_coding
WBGene00006718	ubc-23	X:8844287-8846275	N2	rnp-6	OK	2.79784	1.46782	-0.930633	-1.90789	0.00205	0.0174119	yes			protein_coding
WBGene00219376	C28G1.10	X:8847276-8848557	N2	rnp-6	OK	7.01631	3.89758	-0.848135	-1.94267	0.00125	0.0117015	yes	GO:0005737; GO:0031625; GO:0043161; GO:0005634; GO:0061630; GO:0000209	ubiquitin protein ligase activity; cytoplasm; ubiquitin protein ligase binding; nucleus; proteasome-mediated ubiquitin-dependent protein catabolic process; protein polyubiquitination	protein_coding
WBGene00018568	F47E1.4	X:9062833-9066657	N2	rnp-6	OK	5.16473	2.33043	-1.1481	-3.19044	5e-05	0.000725861	yes	GO:0006810; GO:0005887; GO:0005215; GO:0016021; GO:0016020; GO:0015347; GO:0005515; GO:0005886; GO:0043252; GO:0006811	transporter activity; integral component of plasma membrane; protein binding; sodium-independent organic anion transport; ion transport; plasma membrane; membrane; integral component of membrane; transport; sodium-independent organic anion transmembrane transporter activity	protein_coding
WBGene00015178	B0416.2	X:9299170-9300131	N2	rnp-6	OK	3.73213	0.772476	-2.27244	-3.16318	0.0001	0.00135972	yes			protein_coding
WBGene00016006	fln-2	X:9397700-9427251	N2	rnp-6	OK	7.50339	10.5173	0.487144	1.95815	0.0005	0.00551085	yes	; GO:0005515	; protein binding	protein_coding
WBGene00007130	B0272.4	X:9428430-9430323	N2	rnp-6	OK	42.2187	28.6882	-0.557426	-1.97016	0.00105	0.0101691	yes	GO:0003824; GO:0005777; GO:0016853; GO:0008152	metabolic process; catalytic activity; isomerase activity; peroxisome	protein_coding
WBGene00002271	lec-8	X:9850208-9851375	N2	rnp-6	OK	167.886	228.577	0.4452	2.0208	0.0003	0.00356315	yes	GO:0030968; GO:0031410; GO:0009636; GO:0030246; GO:0050830; GO:0051861	response to toxic substance; carbohydrate binding; glycolipid binding; endoplasmic reticulum unfolded protein response; cytoplasmic vesicle; defense response to Gram-positive bacterium	protein_coding
WBGene00023491	tsp-21	X:9933246-9937133	N2	rnp-6	OK	10.8984	4.86951	-1.16227	-3.14267	5e-05	0.000725861	yes	GO:0016021; GO:0016020; GO:0005887; GO:0007166	integral component of plasma membrane; integral component of membrane; cell surface receptor signaling pathway; membrane	protein_coding
WBGene00006839	unc-115	X:10146891-10153096	N2	rnp-6	OK	16.4442	12.0928	-0.443438	-1.69186	0.003	0.0235082	yes	GO:0005737; GO:0010591; GO:0007010; GO:0051489; GO:0005829; GO:0005886; GO:0051015; GO:0003779; GO:0048812; GO:0008270; GO:0005515; GO:0009925; GO:0046872	actin filament binding; basal plasma membrane; actin binding; cytosol; protein binding; neuron projection morphogenesis; zinc ion binding; metal ion binding; regulation of filopodium assembly; cytoplasm; cytoskeleton organization; plasma membrane; regulation of lamellipodium assembly	protein_coding
WBGene00011107	R07E3.6	X:10317721-10321854	N2	rnp-6	OK	1.18529	0.41926	-1.49933	-2.84845	5e-05	0.000725861	yes			protein_coding
WBGene00010345	F59F5.7	X:10559534-10566668	N2	rnp-6	OK	0.653751	0.301129	-1.11836	-1.86362	0.0024	0.0197654	yes			protein_coding
WBGene00008749	F13E6.5	X:10695307-10711858	N2	rnp-6	OK	25.0426	16.6034	-0.592909	-1.80698	0.00125	0.0117015	yes	GO:0006644; GO:0016021; GO:0016020; GO:0007165; GO:0005887; GO:0046839; GO:0008195; GO:0042577	phosphatidate phosphatase activity; lipid phosphatase activity; integral component of plasma membrane; signal transduction; membrane; phospholipid metabolic process; phospholipid dephosphorylation; integral component of membrane	protein_coding
WBGene00003943	pbo-4	X:10954133-10958388	N2	rnp-6	OK	12.6382	8.56558	-0.561166	-1.99651	0.0009	0.00897191	yes	GO:1904731; GO:0098719; GO:1902600; GO:0030421; GO:0045989; GO:0051453; GO:0030641; GO:0071805; GO:0006885; GO:0016021; GO:0016020; GO:0010877; GO:0015297; GO:0006812; GO:0006811; GO:0006810; GO:0015299; GO:0016323; GO:0005886; GO:0006814; GO:0055085; GO:0005516; GO:0015386; GO:0015385	cation transport; solute:proton antiporter activity; sodium:proton antiporter activity; regulation of intracellular pH; plasma membrane; ion transport; calmodulin binding; antiporter activity; transport; membrane; hydrogen ion transmembrane transport; regulation of cellular pH; lipid transport involved in lipid storage; potassium ion transmembrane transport; potassium:proton antiporter activity; …	protein_coding
WBGene00012261	lpr-3	X:11057371-11059794	N2	rnp-6	OK	9.45475	5.19107	-0.865008	-2.52516	0.00015	0.00195025	yes	GO:0044765; GO:0005576	extracellular region; single-organism transport	protein_coding
WBGene00012255	lpr-6	X:11059993-11061868	N2	rnp-6	OK	6.07291	3.31449	-0.873599	-2.05265	0.0005	0.00551085	yes	GO:0016021; GO:0016020; GO:0044765; GO:0005576	extracellular region; single-organism transport; integral component of membrane; membrane	protein_coding
WBGene00012256	lpr-5	X:11062131-11064540	N2	rnp-6	OK	5.14159	1.89534	-1.43975	-3.50976	5e-05	0.000725861	yes	GO:0044765; GO:0005576	extracellular region; single-organism transport	protein_coding
WBGene00012257	lpr-4	X:11065132-11066811	N2	rnp-6	OK	5.358	1.74719	-1.61666	-3.62115	5e-05	0.000725861	yes	GO:0044765; GO:0005576	extracellular region; single-organism transport	protein_coding
WBGene00012259	sulp-7	X:11080677-11087474	N2	rnp-6	OK	5.35194	2.93087	-0.868733	-2.33069	5e-05	0.000725861	yes	GO:0042391; GO:1902358; GO:0006810; GO:0019532; GO:0015301; GO:0019531; GO:1902476; GO:0016021; GO:0016020; GO:0015701; GO:0015116; GO:0015106; GO:0008271; GO:0005887; GO:0008272; GO:0051453; GO:0005254; GO:0055085	regulation of membrane potential; integral component of membrane; sulfate transport; anion:anion antiporter activity; chloride transmembrane transport; integral component of plasma membrane; oxalate transport; chloride channel activity; secondary active sulfate transmembrane transporter activity; regulation of intracellular pH; transport; oxalate transmembrane transporter activity; membrane; bica…	protein_coding
WBGene00007266	C03A3.1	X:11257360-11260225	N2	rnp-6	OK	2.36224	0.917058	-1.36507	-2.53429	5e-05	0.000725861	yes	GO:0016021; GO:0016020	integral component of membrane; membrane	protein_coding
WBGene00013976	nhr-33	X:11318277-11321076	N2	rnp-6	OK	2.62922	1.42039	-0.888349	-1.89182	0.0026	0.0210083	yes	GO:0005737; GO:0043565; GO:0040008; GO:0071294; GO:0003700; GO:0005634; GO:0001158; GO:0006355; GO:0010628; GO:0008270; GO:0043401; GO:0003677; GO:0046872; GO:0001199; GO:0006351	regulation of growth; enhancer sequence-specific DNA binding; steroid hormone mediated signaling pathway; regulation of transcription, DNA-templated; DNA binding; sequence-specific DNA binding; zinc ion binding; cellular response to zinc ion; nucleus; metal ion binding; transcription factor activity, metal ion regulated sequence-specific DNA binding; cytoplasm; transcription, DNA-templated; posit…	protein_coding
WBGene00007957	C35C5.8	X:11534053-11536564	N2	rnp-6	OK	10.4758	5.31457	-0.979039	-2.78067	5e-05	0.000725861	yes			protein_coding
WBGene00008205	sams-1	X:11965961-11969784	N2	rnp-6	OK	78.3679	136.938	0.805185	3.55884	5e-05	0.000725861	yes	GO:0004478; GO:0006556; GO:0005829; GO:0000166; GO:0016740; GO:0005515; GO:0046872; GO:0006730; GO:0005524; GO:0010888	methionine adenosyltransferase activity; S-adenosylmethionine biosynthetic process; one-carbon metabolic process; cytosol; transferase activity; negative regulation of lipid storage; ATP binding; protein binding; nucleotide binding; metal ion binding	protein_coding
WBGene00008211	C49F5.7	X:11994783-11995839	N2	rnp-6	OK	187.813	135.618	-0.469753	-1.76447	0.00195	0.0167396	yes			protein_coding
WBGene00000754	col-181	X:12104929-12106081	N2	rnp-6	OK	957.695	1213.33	0.341338	1.54171	0.0071	0.0459858	yes	GO:0016021; GO:0016020; GO:0005581; GO:0042302	structural constituent of cuticle; collagen trimer; integral component of membrane; membrane	protein_coding
WBGene00008451	E01G6.3	X:12241715-12244652	N2	rnp-6	OK	0.779251	0.266184	-1.54966	-2.32888	0.00085	0.00858204	yes	GO:0016787; GO:0016021; GO:0016020; GO:0052689	hydrolase activity; carboxylic ester hydrolase activity; integral component of membrane; membrane	protein_coding
WBGene00003514	myo-2	X:12468060-12475341	N2	rnp-6	OK	10.813	19.5605	0.855176	3.59235	5e-05	0.000725861	yes	GO:0005737; GO:0030016; GO:0032982; GO:0000166; GO:0003779; GO:0016459; GO:0016460; GO:0003774; GO:0005524	myosin complex; motor activity; cytoplasm; actin binding; myosin II complex; ATP binding; myosin filament; nucleotide binding; myofibril	protein_coding
WBGene00010998	R03G8.3	X:13091130-13094424	N2	rnp-6	OK	8.16813	5.39562	-0.598217	-1.87276	0.0014	0.0128195	yes	GO:0005615; GO:0032504; GO:0016021; GO:0016020; GO:0003824; GO:0008152	extracellular space; catalytic activity; metabolic process; membrane; multicellular organism reproduction; integral component of membrane	protein_coding
WBGene00008925	F17H10.1	X:13105191-13108543	N2	rnp-6	OK	16.5331	22.7936	0.463271	1.72282	0.00265	0.0213265	yes			protein_coding
WBGene00009798	F46G10.4	X:13334076-13336784	N2	rnp-6	OK	6.77804	4.48208	-0.5967	-1.67061	0.0041	0.0300971	yes	GO:0016787; GO:0016021; GO:0016020; GO:0006629	hydrolase activity; integral component of membrane; lipid metabolic process; membrane	protein_coding
WBGene00007810	C29F7.1	X:13412574-13414613	N2	rnp-6	OK	11.7626	5.91582	-0.991557	-2.89053	5e-05	0.000725861	yes			protein_coding
WBGene00007811	C29F7.2	X:13416077-13418220	N2	rnp-6	OK	169.426	116.899	-0.535384	-2.41695	0.0001	0.00135972	yes			protein_coding
WBGene00000757	col-184	X:13469387-13470471	N2	rnp-6	OK	442.456	581.831	0.395066	1.82629	0.00155	0.013881	yes	GO:0042302; GO:0016021; GO:0016020; GO:0005581; GO:0005198	structural constituent of cuticle; collagen trimer; integral component of membrane; structural molecule activity; membrane	protein_coding
WBGene00010034	F54B11.11	X:13578782-13581728	N2	rnp-6	OK	0.19667	0.808059	2.03869	2.8131	0.0001	0.00135972	yes	GO:0050829; GO:0045087; GO:0045121	innate immune response; membrane raft; defense response to Gram-negative bacterium	protein_coding
WBGene00000262	bra-1	X:13598470-13599675	N2	rnp-6	OK	11.7326	7.38889	-0.667098	-1.7911	0.0028	0.0222533	yes	GO:0042393; GO:0005634; GO:0003712; GO:0030425; GO:0030424; GO:0006355; GO:0000977; GO:0005515; GO:0008340; GO:0005102; GO:0003682; GO:0030512	negative regulation of transforming growth factor beta receptor signaling pathway; histone binding; chromatin binding; receptor binding; regulation of transcription, DNA-templated; axon; dendrite; nucleus; determination of adult lifespan; protein binding; transcription cofactor activity; RNA polymerase II regulatory region sequence-specific DNA binding	protein_coding
WBGene00010504	K02D3.1	X:13706927-13707955	N2	rnp-6	OK	1.28692	2.41715	0.90939	1.62645	0.00585	0.0395707	yes			protein_coding
WBGene00010116	F55F3.2	X:13760289-13763993	N2	rnp-6	OK	4.33354	6.43845	0.571168	1.63741	0.0049	0.0345471	yes	GO:0016787; GO:0052689	hydrolase activity; carboxylic ester hydrolase activity	protein_coding
WBGene00007904	C33G3.4	X:14071183-14076295	N2	rnp-6	OK	11.4281	8.02973	-0.509161	-1.80781	0.0019	0.0163938	yes	GO:0016787; GO:0005975; GO:0004567; GO:0016798; GO:0005764; GO:0008152; GO:0004553	hydrolase activity, acting on glycosyl bonds; hydrolase activity, hydrolyzing O-glycosyl compounds; hydrolase activity; carbohydrate metabolic process; beta-mannosidase activity; metabolic process; lysosome	protein_coding
WBGene00010572	wdr-5.2	X:14350139-14352148	N2	rnp-6	OK	5.61742	3.46885	-0.695451	-1.76533	0.0025	0.0203879	yes	GO:0005515	protein binding	protein_coding
WBGene00009629	sprr-2	X:14800119-14804357	N2	rnp-6	OK	0.742023	1.32876	0.840546	1.54188	0.007	0.0454744	yes	GO:0008528; GO:0016021; GO:0016020; GO:0007186; GO:0004930	G-protein coupled receptor signaling pathway; G-protein coupled peptide receptor activity; G-protein coupled receptor activity; integral component of membrane; membrane	protein_coding
WBGene00001055	dpf-2	X:14831823-14838187	N2	rnp-6	OK	12.3928	9.21111	-0.42805	-1.52649	0.0072	0.0464409	yes	GO:0016787; GO:0004177; GO:0016021; GO:0016020; GO:0005886; GO:0006508; GO:0008233; GO:0008236	serine-type peptidase activity; hydrolase activity; aminopeptidase activity; peptidase activity; membrane; proteolysis; integral component of membrane; plasma membrane	protein_coding
WBGene00011681	T10B10.4	X:15190122-15193066	N2	rnp-6	OK	5.80265	2.84809	-1.02672	-2.45847	0.0001	0.00135972	yes	GO:0005783; GO:0005739; GO:0047961	mitochondrion; glycine N-acyltransferase activity; endoplasmic reticulum	protein_coding
WBGene00010724	K09E9.1	X:15620488-15626620	N2	rnp-6	OK	15.0972	7.05374	-1.09782	-3.58191	5e-05	0.000725861	yes	GO:0008514; GO:0016021; GO:0016020; GO:0015711; GO:0005887; GO:0055085	integral component of plasma membrane; organic anion transport; organic anion transmembrane transporter activity; integral component of membrane; membrane; transmembrane transport	protein_coding
WBGene00007174	mboa-1	X:16030805-16034816	N2	rnp-6	OK	1.39867	0.529426	-1.40155	-2.36235	0.0006	0.00643061	yes	GO:0005783; GO:0034736; GO:0016021; GO:0016020; GO:0005789; GO:0016740; GO:0016746; GO:0034435; GO:0008374; GO:0042632; GO:0008203	endoplasmic reticulum membrane; cholesterol O-acyltransferase activity; cholesterol metabolic process; transferase activity; endoplasmic reticulum; O-acyltransferase activity; transferase activity, transferring acyl groups; cholesterol esterification; membrane; integral component of membrane; cholesterol homeostasis	protein_coding
WBGene00015545	C06G1.1	X:16633362-16637633	N2	rnp-6	OK	2.59117	1.41339	-0.87444	-2.02077	0.0007	0.00728567	yes	GO:0008289	lipid binding	protein_coding
WBGene00002207	sid-3	X:17186139-17193293	N2	rnp-6	OK	8.15418	11.2842	0.468688	1.77335	0.0026	0.0210083	yes	GO:0005737; GO:0042127; GO:0006468; GO:0030154; GO:0038083; GO:0016310; GO:0045087; GO:0016301; GO:0000166; GO:0016246; GO:0016740; GO:0004715; GO:0004713; GO:0005515; GO:0004672; GO:0007169; GO:0005102; GO:0016477; GO:0031234; GO:0005524; GO:0031047	innate immune response; peptidyl-tyrosine autophosphorylation; RNA interference; cell migration; protein phosphorylation; transferase activity; extrinsic component of cytoplasmic side of plasma membrane; non-membrane spanning protein tyrosine kinase activity; phosphorylation; cell differentiation; protein kinase activity; kinase activity; protein tyrosine kinase activity; receptor binding; regula…	protein_coding
WBGene00017376	F11C7.2	X:17396816-17397779	N2	rnp-6	OK	1.76286	6.58164	1.90053	3.10353	5e-05	0.000725861	yes			protein_coding
WBGene00003369	mlc-1	X:17459159-17460767	N2	rnp-6	OK	137.72	217.031	0.656158	2.98299	5e-05	0.000725861	yes	GO:0040011; GO:0007517; GO:0006937; GO:0002119; GO:0005859; GO:0016459; GO:0005509; GO:0046872	calcium ion binding; nematode larval development; myosin complex; regulation of muscle contraction; muscle organ development; muscle myosin complex; metal ion binding; locomotion	protein_coding
WBGene00006319	sup-10	X:17528409-17531981	N2	rnp-6	OK	1.33265	0.639244	-1.05986	-1.71657	0.00415	0.0303769	yes	GO:0006810; GO:0006937; GO:0006813; GO:0016021; GO:0016020; GO:0043266; GO:0055120; GO:0005887; GO:0065009; GO:0015459; GO:0006811	regulation of potassium ion transport; potassium channel regulator activity; integral component of plasma membrane; striated muscle dense body; regulation of muscle contraction; ion transport; membrane; potassium ion transport; regulation of molecular function; integral component of membrane; transport	protein_coding
WBGene00020732	T23E7.2	X:17671028-17680790	N2	rnp-6	OK	11.3269	23.7959	1.07096	3.39598	5e-05	0.000725861	yes			protein_coding
WBGene00017625	cgt-2	X:17695231-17701744	N2	rnp-6	OK	3.46112	5.31697	0.619367	1.7148	0.0033	0.025334	yes	GO:0006679; GO:0006629; GO:0016021; GO:0016020; GO:0008120; GO:0016740; GO:0016757; GO:0006665	transferase activity, transferring glycosyl groups; glucosylceramide biosynthetic process; ceramide glucosyltransferase activity; transferase activity; membrane; lipid metabolic process; sphingolipid metabolic process; integral component of membrane	protein_coding
WBGene00015430	C04E7.3	X:344126-346289	N2	rnp-6	OK	5.82392	3.29667	-0.820981	-2.18745	0.0003	0.00356315	yes			protein_coding
WBGene00019863	R04A9.3	X:377389-380568	N2	rnp-6	OK	2.77939	1.29415	-1.10277	-2.01049	0.0014	0.0128195	yes			protein_coding
WBGene00044281	R04A9.7	X:391359-394828	N2	rnp-6	OK	4.81699	2.16535	-1.15353	-2.82327	5e-05	0.000725861	yes	GO:0005737; GO:0006468; GO:0016310; GO:0005634; GO:0016301; GO:0000166; GO:0004674; GO:0016740; GO:0004672; GO:0035556; GO:0005524	intracellular signal transduction; protein phosphorylation; transferase activity; phosphorylation; protein kinase activity; kinase activity; nucleus; ATP binding; cytoplasm; protein serine/threonine kinase activity; nucleotide binding	protein_coding
WBGene00017781	F25E2.3	X:811172-813126	N2	rnp-6	OK	8.49925	5.00602	-0.763673	-2.03083	0.0006	0.00643061	yes	GO:0005782; GO:0006637; GO:0047617; GO:0009062	acyl-CoA metabolic process; acyl-CoA hydrolase activity; peroxisomal matrix; fatty acid catabolic process	protein_coding
WBGene00002058	ifd-2	X:813851-815929	N2	rnp-6	OK	11.7272	17.4349	0.572123	1.93891	0.0006	0.00643061	yes	GO:0005737; GO:0005882; GO:0005198	cytoplasm; intermediate filament; structural molecule activity	protein_coding
WBGene00003104	mab-7	X:892241-898070	N2	rnp-6	OK	1.77009	0.836705	-1.08103	-1.91695	0.00195	0.0167396	yes	GO:0016021; GO:0016020; GO:0007275; GO:0005515; GO:0005886	protein binding; multicellular organism development; integral component of membrane; plasma membrane; membrane	protein_coding
WBGene00003991	pfn-3	X:1079422-1080653	N2	rnp-6	OK	13.2147	21.4517	0.698943	1.88982	0.0011	0.0105816	yes	GO:0005856; GO:0005737; GO:0015629; GO:0071689; GO:0003779; GO:0055120; GO:0042989; GO:0005938; GO:0003785	actin monomer binding; muscle thin filament assembly; actin binding; cytoplasm; striated muscle dense body; sequestering of actin monomers; cell cortex; cytoskeleton; actin cytoskeleton	protein_coding
WBGene00020491	T13G4.4	X:1188455-1194507	N2	rnp-6	OK	5.60177	3.19336	-0.810805	-1.87495	0.00145	0.013173	yes	GO:0008168; GO:0016740; GO:0046872; GO:0032259	transferase activity; methyltransferase activity; metal ion binding; methylation	protein_coding
WBGene00006650	tts-1	X:1504130-1504841	N2	rnp-6	OK	808.193	572.092	-0.498453	-2.31598	5e-05	0.000725861	yes
WBGene00004351	rgs-8.1	X:1952478-1953560	N2	rnp-6	OK	0.807337	0	-inf		5e-05	0.000725861	yes	GO:0005737; GO:0008277; GO:0005096; GO:0043547; GO:0005886	cytoplasm; regulation of G-protein coupled receptor protein signaling pathway; GTPase activator activity; plasma membrane; positive regulation of GTPase activity	protein_coding
WBGene00020765	T24C12.3	X:2196523-2203894	N2	rnp-6	OK	8.72129	5.24739	-0.732941	-2.22112	0.00015	0.00195025	yes	GO:0016773; GO:0016798	hydrolase activity, acting on glycosyl bonds; phosphotransferase activity, alcohol group as acceptor	protein_coding
WBGene00019867	R04B3.2	X:2471539-2473674	N2	rnp-6	OK	6.79052	3.43096	-0.984908	-2.50742	5e-05	0.000725861	yes	GO:0005764; GO:0016787; GO:0008233; GO:0003948; GO:0006508	hydrolase activity; peptidase activity; proteolysis; N4-(beta-N-acetylglucosaminyl)-L-asparaginase activity; lysosome	protein_coding
WBGene00018716	F52H2.4	X:2543344-2548028	N2	rnp-6	OK	1.52435	0.845635	-0.850085	-1.60295	0.0073	0.0469136	yes	GO:0005215; GO:0016021; GO:0016020; GO:0055085; GO:0006810	transporter activity; transmembrane transport; integral component of membrane; transport; membrane	protein_coding
WBGene00006679	twk-26	X:3050364-3054413	N2	rnp-6	OK	0.863322	2.29293	1.40922	2.89823	5e-05	0.000725861	yes	GO:0005267; GO:0006810; GO:0071805; GO:0016021; GO:0016020; GO:0030322; GO:0005887; GO:0022841; GO:0006811	integral component of plasma membrane; potassium ion transmembrane transport; ion transport; potassium channel activity; stabilization of membrane potential; membrane; potassium ion leak channel activity; integral component of membrane; transport	protein_coding
WBGene00000503	cht-1	X:3397607-3400017	N2	rnp-6	OK	114.18	82.09	-0.476025	-2.09983	0.00025	0.00303907	yes	GO:0005737; GO:0016787; GO:0005975; GO:0004568; GO:0009620; GO:0016798; GO:0000272; GO:0005576; GO:0008061; GO:0008152; GO:0004553; GO:0006030; GO:0006032	hydrolase activity, acting on glycosyl bonds; chitin metabolic process; response to fungus; hydrolase activity, hydrolyzing O-glycosyl compounds; extracellular region; cytoplasm; carbohydrate metabolic process; metabolic process; hydrolase activity; polysaccharide catabolic process; chitinase activity; chitin binding; chitin catabolic process	protein_coding
WBGene00006927	vit-3	X:3567396-3572566	N2	rnp-6	OK	409.274	319.463	-0.357418	-1.53282	0.0072	0.0464409	yes	GO:0005319; GO:0005576; GO:0045735; GO:0006869	extracellular region; lipid transport; nutrient reservoir activity; lipid transporter activity	protein_coding
WBGene00020846	T27A10.6	X:3588856-3596460	N2	rnp-6	OK	2.02083	1.05638	-0.935821	-2.21451	0.00025	0.00303907	yes			protein_coding
WBGene00020294	T06F4.1	X:4056896-4071492	N2	rnp-6	OK	1.1543	2.35123	1.0264	1.88895	0.001	0.0097769	yes	GO:0016021; GO:0016020	integral component of membrane; membrane	protein_coding
WBGene00017307	F09F9.2	X:4110432-4111595	N2	rnp-6	OK	2.92575	1.09766	-1.41437	-2.2142	0.0012	0.0113201	yes			protein_coding
WBGene00044567	C46C11.4	X:4644403-4647192	N2	rnp-6	OK	2.36275	0.787173	-1.58571	-2.87777	5e-05	0.000725861	yes	GO:0016021; GO:0016020; GO:0005515	protein binding; integral component of membrane; membrane	protein_coding
WBGene00019404	K05B2.4	X:4919019-4920988	N2	rnp-6	OK	7.3639	2.04017	-1.85178	-4.44701	5e-05	0.000725861	yes	GO:0005737; GO:0006631; GO:0006637; GO:0047617; GO:0016790	acyl-CoA metabolic process; cytoplasm; fatty acid metabolic process; thiolester hydrolase activity; acyl-CoA hydrolase activity	protein_coding
WBGene00019760	calu-1	X:4969532-4970911	N2	rnp-6	OK	85.0439	111.411	0.389611	1.66236	0.00255	0.0206975	yes	GO:0042335; GO:0005509; GO:0005783	calcium ion binding; cuticle development; endoplasmic reticulum	protein_coding
WBGene00015389	scav-1	X:5397675-5400584	N2	rnp-6	OK	33.6007	25.3301	-0.407635	-1.61605	0.0057	0.0388114	yes	GO:0016021; GO:0016020	integral component of membrane; membrane	protein_coding
WBGene00016934	mboa-3	X:5519875-5522819	N2	rnp-6	OK	24.4599	17.0809	-0.518036	-1.92239	0.0011	0.0105816	yes	GO:0016021; GO:0016020; GO:0016746; GO:0016740	transferase activity; transferase activity, transferring acyl groups; integral component of membrane; membrane	protein_coding
WBGene00016568	C41G11.1	X:5714278-5720268	N2	rnp-6	OK	25.8157	14.3575	-0.846447	-2.44674	5e-05	0.000725861	yes	GO:0016787	hydrolase activity	protein_coding
WBGene00021060	dct-11	X:5838038-5839757	N2	rnp-6	OK	37.3513	26.8664	-0.475356	-1.66255	0.0039	0.0289822	yes	GO:0016021; GO:0016020	integral component of membrane; membrane	protein_coding
WBGene00017718	F22F4.5	X:5984974-5992835	N2	rnp-6	OK	2.77511	1.11153	-1.32001	-1.94684	0.00305	0.0238181	yes			protein_coding
WBGene00015623	C09B8.4	X:6018480-6019936	N2	rnp-6	OK	7.05337	4.07307	-0.792197	-1.88907	0.002	0.017068	yes			protein_coding
WBGene00004219	ptr-4	X:6060756-6065986	N2	rnp-6	OK	4.46535	2.50992	-0.831134	-2.28963	0.00015	0.00195025	yes	GO:0045138; GO:0016021; GO:0016020; GO:0006897; GO:0018996	endocytosis; molting cycle, collagen and cuticulin-based cuticle; integral component of membrane; nematode male tail tip morphogenesis; membrane	protein_coding
WBGene00004193	prx-3	X:6110794-6112916	N2	rnp-6	OK	14.1493	8.15627	-0.794753	-2.38932	5e-05	0.000725861	yes	; GO:0005779; GO:0007031	; peroxisome organization; integral component of peroxisomal membrane	protein_coding
WBGene00077690	mtp-18	X:6205205-6206475	N2	rnp-6	OK	10.5632	6.24227	-0.758911	-1.76176	0.00315	0.0244316	yes	GO:0016020; GO:0000266; GO:0016021; GO:0006915; GO:0005739; GO:0005575; GO:0005743; GO:0003674; GO:0008150	mitochondrial fission; mitochondrial inner membrane; biological_process; molecular_function; cellular_component; apoptotic process; membrane; mitochondrion; integral component of membrane	protein_coding
WBGene00003495	mup-2	X:6408463-6410359	N2	rnp-6	OK	100.009	151.689	0.600991	2.71696	5e-05	0.000725861	yes	GO:0048598; GO:0030728; GO:0006937; GO:0045214; GO:0007526; GO:0007413; GO:0005861	ovulation; regulation of muscle contraction; troponin complex; axonal fasciculation; embryonic morphogenesis; sarcomere organization; larval somatic muscle development	protein_coding
WBGene00019617	K10C2.1	X:6421035-6430610	N2	rnp-6	OK	70.3727	51.624	-0.446974	-2.06775	0.00045	0.00504819	yes	GO:0051603; GO:0004180; GO:0016787; GO:0045121; GO:0004185; GO:0006508; GO:0008233	carboxypeptidase activity; hydrolase activity; serine-type carboxypeptidase activity; peptidase activity; proteolysis involved in cellular protein catabolic process; proteolysis; membrane raft	protein_coding
WBGene00206388	K10C2.14	X:6439893-6440559	N2	rnp-6	OK	0.97481	2.87535	1.56054	1.81694	0.00795	0.0499487	yes			protein_coding
WBGene00016088	clec-266	X:6617440-6627975	N2	rnp-6	OK	127.261	96.8234	-0.394358	-1.58954	0.00525	0.0364418	yes	GO:0016021; GO:0016020; GO:0030246	carbohydrate binding; integral component of membrane; membrane	protein_coding
WBGene00018257	F41B4.1	X:6823889-6825837	N2	rnp-6	OK	2.20909	3.68225	0.737137	1.72974	0.00325	0.0250162	yes	GO:0005515	protein binding	protein_coding
WBGene00001617	glr-6	X:6836385-6840615	N2	rnp-6	OK	2.22398	1.18156	-0.912446	-2.13005	0.00045	0.00504819	yes	GO:0006810; GO:0004970; GO:0045211; GO:0035235; GO:0006811; GO:0016020; GO:0005216; GO:0005234; GO:0034220; GO:0045202; GO:0005886; GO:0060079; GO:0016021; GO:0030054; GO:0004872	excitatory postsynaptic potential; postsynaptic membrane; synapse; ion transmembrane transport; extracellularly glutamate-gated ion channel activity; ionotropic glutamate receptor signaling pathway; ion channel activity; cell junction; ion transport; ionotropic glutamate receptor activity; transport; membrane; receptor activity; integral component of membrane; plasma membrane	protein_coding
WBGene00000116	alh-10	X:7139900-7143641	N2	rnp-6	OK	27.2031	9.61066	-1.50106	-4.99863	5e-05	0.000725861	yes	GO:0055114; GO:0008152; GO:0016491	metabolic process; oxidation-reduction process; oxidoreductase activity	protein_coding
WBGene00006351	sur-5	X:7301356-7305570	N2	rnp-6	OK	11.2699	15.4998	0.459779	1.69407	0.00315	0.0244316	yes	GO:0005737; GO:0006631; GO:0006629; GO:0005634; GO:0000166; GO:0003824; GO:0008152; GO:0016874; GO:0005524; GO:0030729	acetoacetate-CoA ligase activity; cytoplasm; fatty acid metabolic process; metabolic process; ligase activity; nucleus; ATP binding; lipid metabolic process; catalytic activity; nucleotide binding	protein_coding
WBGene00001912	his-38	X:7309563-7309889	N2	rnp-6	OK	480.307	347.745	-0.465928	-1.92707	0.0009	0.00897191	yes	GO:0042393; GO:0005634; GO:0003677; GO:0000786; GO:0000788; GO:0046982; GO:0005694; GO:0006334	nucleosome; histone binding; DNA binding; protein heterodimerization activity; nucleosome assembly; nuclear nucleosome; nucleus; chromosome	protein_coding
WBGene00004987	spp-2	X:7315994-7316773	N2	rnp-6	OK	164.337	113.062	-0.539543	-2.05664	0.00025	0.00303907	yes	GO:0050830	defense response to Gram-positive bacterium	protein_coding
WBGene00004989	spp-4	X:7318274-7318776	N2	rnp-6	OK	65.0727	45.4407	-0.518067	-1.59409	0.00655	0.043217	yes			protein_coding
WBGene00015295	acl-12	X:7439398-7442577	N2	rnp-6	OK	26.892	17.5482	-0.615852	-2.22582	5e-05	0.000725861	yes	GO:0006629; GO:0008654; GO:0016021; GO:0016020; GO:0003841; GO:0016024; GO:0016740; GO:0016746; GO:0008152	phospholipid biosynthetic process; 1-acylglycerol-3-phosphate O-acyltransferase activity; CDP-diacylglycerol biosynthetic process; transferase activity; metabolic process; transferase activity, transferring acyl groups; lipid metabolic process; membrane; integral component of membrane	protein_coding
WBGene00018606	F48E3.6	X:7501235-7502632	N2	rnp-6	OK	13.6979	8.94756	-0.61439	-1.88181	0.0014	0.0128195	yes	GO:0016021; GO:0016020	integral component of membrane; membrane	protein_coding
WBGene00019803	PDB1.1	X:7556793-7559070	N2	rnp-6	OK	38.2367	22.6701	-0.75417	-2.15402	0.0002	0.00250605	yes	GO:0008324; GO:0006812; GO:0045087; GO:0016020; GO:0055085; GO:0098655; GO:0016021	cation transport; innate immune response; cation transmembrane transporter activity; cation transmembrane transport; integral component of membrane; membrane; transmembrane transport	protein_coding
WBGene00017244	apy-1	X:7565322-7569722	N2	rnp-6	OK	89.9982	66.439	-0.437867	-1.73013	0.00185	0.016033	yes	GO:0016787; GO:0060465; GO:0007369; GO:0000003; GO:0030968; GO:0016021; GO:0016020; GO:0017110; GO:0040009; GO:0004382; GO:0045134; GO:0030166; GO:0016462; GO:0005509; GO:0005515; GO:0009408; GO:0008340; GO:0046872; GO:0046712; GO:0006256; GO:0012505	calcium ion binding; guanosine-diphosphatase activity; GDP catabolic process; regulation of growth rate; uridine-diphosphatase activity; hydrolase activity; protein binding; nucleoside-diphosphatase activity; endoplasmic reticulum unfolded protein response; pyrophosphatase activity; gastrulation; proteoglycan biosynthetic process; response to heat; metal ion binding; reproduction; membrane; phary…	protein_coding
WBGene00016898	C53C9.2	X:7686645-7689219	N2	rnp-6	OK	12.0515	16.6484	0.466169	1.63587	0.00465	0.03317	yes			protein_coding
WBGene00016534	C39D10.7	X:7907954-7913932	N2	rnp-6	OK	156.131	206.412	0.402767	1.8777	0.00115	0.01096	yes	GO:0006030; GO:0005576; GO:0008061; GO:0005515	extracellular region; protein binding; chitin metabolic process; chitin binding	protein_coding
WBGene00001000	dim-1	X:8050469-8058220	N2	rnp-6	OK	21.9289	34.1061	0.637199	2.39509	5e-05	0.000725861	yes	GO:0005737; GO:0005515	cytoplasm; protein binding	protein_coding
WBGene00018885	drd-5	X:8344699-8346359	N2	rnp-6	OK	1.1365	2.11227	0.894198	1.71662	0.00325	0.0250162	yes	GO:0016021; GO:0016020; GO:0055114; GO:0016491	oxidation-reduction process; integral component of membrane; oxidoreductase activity; membrane	protein_coding
WBGene00017515	F16F9.4	X:8457637-8463330	N2	rnp-6	OK	5.18337	3.23434	-0.680421	-1.65819	0.00485	0.0342461	yes	GO:0016787; GO:0016021; GO:0016020; GO:0052689; GO:0008152; GO:0009056	carboxylic ester hydrolase activity; hydrolase activity; metabolic process; membrane; catabolic process; integral component of membrane	protein_coding
WBGene00017048	D2021.4	X:8546449-8549049	N2	rnp-6	OK	3.7092	1.98495	-0.902005	-1.93014	0.0013	0.0120757	yes	GO:0005782; GO:0006637; GO:0047617; GO:0009062	acyl-CoA metabolic process; acyl-CoA hydrolase activity; peroxisomal matrix; fatty acid catabolic process	protein_coding
WBGene00018730	F53A9.7	X:8716533-8716999	N2	rnp-6	OK	12.8992	25.6773	0.993217	2.62266	5e-05	0.000725861	yes			protein_coding
WBGene00018731	F53A9.8	X:8718557-8718974	N2	rnp-6	OK	350.043	262.453	-0.415474	-1.72681	0.00265	0.0213265	yes	GO:0050830	defense response to Gram-positive bacterium	protein_coding
WBGene00006587	tnt-2	X:8721556-8723552	N2	rnp-6	OK	61.7047	95.8539	0.635458	2.76848	5e-05	0.000725861	yes	GO:0005861; GO:0006937	regulation of muscle contraction; troponin complex	protein_coding
WBGene00019731	M02D8.5	X:8754575-8761580	N2	rnp-6	OK	1.01855	0.480344	-1.08438	-2.10991	0.0006	0.00643061	yes			protein_coding
WBGene00019871	R04E5.8	X:8801623-8806111	N2	rnp-6	OK	3.32858	4.95958	0.575314	1.61052	0.0057	0.0388114	yes			protein_coding
WBGene00002057	ifd-1	X:8820706-8824448	N2	rnp-6	OK	7.83732	4.86019	-0.689347	-2.07107	0.00035	0.00407043	yes	GO:0005737; GO:0005882; GO:0005198	cytoplasm; intermediate filament; structural molecule activity	protein_coding
WBGene00017582	F18G5.6	X:9262058-9264331	N2	rnp-6	OK	31.5354	22.5322	-0.484986	-1.63998	0.00415	0.0303769	yes	GO:0045087	innate immune response	protein_coding
WBGene00015182	B0416.7	X:9296944-9297950	N2	rnp-6	OK	10.0624	4.08024	-1.30225	-2.46157	0.0001	0.00135972	yes			protein_coding
WBGene00045261	H29C22.1	X:9310616-9311326	N2	rnp-6	OK	173.688	105.118	-0.724487	-2.87104	5e-05	0.000725861	yes			protein_coding
WBGene00007650	ugt-23	X:9922902-9925116	N2	rnp-6	OK	28.6994	19.4418	-0.561856	-2.0985	0.0003	0.00356315	yes	GO:0007369; GO:0008152; GO:0016021; GO:0016020; GO:0016740; GO:0016757; GO:0016758; GO:0015020; GO:0043231	transferase activity, transferring glycosyl groups; transferase activity; membrane; transferase activity, transferring hexosyl groups; metabolic process; gastrulation; glucuronosyltransferase activity; intracellular membrane-bounded organelle; integral component of membrane	protein_coding
WBGene00007653	cysl-1	X:9952561-9954533	N2	rnp-6	OK	18.2229	12.9871	-0.488681	-1.60361	0.00435	0.0315234	yes	GO:0005737; GO:0008652; GO:0006535; GO:0004124; GO:0019899; GO:0019344; GO:0016740; GO:0055120; GO:0030170; GO:0005515; GO:0001666	enzyme binding; pyridoxal phosphate binding; response to hypoxia; cysteine biosynthetic process; transferase activity; striated muscle dense body; cysteine biosynthetic process from serine; cytoplasm; protein binding; cysteine synthase activity; cellular amino acid biosynthetic process	protein_coding
WBGene00008953	F19C6.4	X:10015034-10017694	N2	rnp-6	OK	1.89533	0.994888	-0.929847	-1.81022	0.002	0.017068	yes	GO:0006508; GO:0008237	metallopeptidase activity; proteolysis	protein_coding
WBGene00013872	ZC374.2	X:10034835-10047417	N2	rnp-6	OK	1.26366	0.722956	-0.805634	-1.57301	0.0077	0.0487669	yes	GO:0005515	protein binding	protein_coding
WBGene00013867	ZC373.2	X:10057924-10058437	N2	rnp-6	OK	719.567	557.764	-0.367474	-1.64146	0.00365	0.0274633	yes			protein_coding
WBGene00001331	erd-2	X:10156857-10160438	N2	rnp-6	OK	35.3949	25.1199	-0.49471	-1.91979	0.00145	0.013173	yes	GO:0006810; GO:0016192; GO:0016021; GO:0016020; GO:0006621; GO:0005789; GO:0046923; GO:0015031; GO:0005783	endoplasmic reticulum membrane; protein retention in ER lumen; ER retention sequence binding; membrane; vesicle-mediated transport; endoplasmic reticulum; protein transport; integral component of membrane; transport	protein_coding
WBGene00009677	F44A6.5	X:10217305-10218760	N2	rnp-6	OK	7.7228	14.2308	0.881819	2.53786	5e-05	0.000725861	yes			protein_coding
WBGene00007593	C14H10.3	X:10220672-10228136	N2	rnp-6	OK	15.4866	10.5783	-0.549924	-2.07305	0.0005	0.00551085	yes	GO:0003824	catalytic activity	protein_coding
WBGene00007592	C14H10.2	X:10242326-10251355	N2	rnp-6	OK	8.9359	6.27941	-0.508985	-1.61277	0.0051	0.0356206	yes			protein_coding
WBGene00011104	cut-5	X:10333860-10338200	N2	rnp-6	OK	1.4899	0.24354	-2.61298	-2.77539	0.00045	0.00504819	yes	GO:0016021; GO:0016020	integral component of membrane; membrane	protein_coding
WBGene00044949	Y49A10A.2	X:10371075-10372354	N2	rnp-6	OK	10.5385	6.72959	-0.647073	-1.69357	0.0038	0.0283741	yes			protein_coding
WBGene00008806	mboa-7	X:10521799-10524565	N2	rnp-6	OK	11.4101	7.78526	-0.551491	-1.71081	0.00335	0.0256524	yes	GO:0006644; GO:0002119; GO:0018991; GO:0006629; GO:0008654; GO:0016021; GO:0016020; GO:0016740; GO:0016746; GO:0035264; GO:0008374; GO:0006661; GO:0043231	phospholipid metabolic process; multicellular organism growth; nematode larval development; phosphatidylinositol biosynthetic process; transferase activity; phospholipid biosynthetic process; O-acyltransferase activity; transferase activity, transferring acyl groups; oviposition; lipid metabolic process; membrane; intracellular membrane-bounded organelle; integral component of membrane	protein_coding
WBGene00003999	pgp-5	X:10854319-10859293	N2	rnp-6	OK	14.7458	10.2816	-0.520244	-2.00278	0.00045	0.00504819	yes	GO:0042626; GO:0006810; GO:0005887; GO:0093002; GO:0016021; GO:0016020; GO:0042493; GO:0000166; GO:1990170; GO:0050830; GO:0016887; GO:0050829; GO:1990169; GO:0055085; GO:0005524; GO:0015562	stress response to cadmium ion; ATPase activity; response to nematicide; integral component of plasma membrane; stress response to copper ion; defense response to Gram-negative bacterium; response to drug; integral component of membrane; efflux transmembrane transporter activity; ATP binding; ATPase activity, coupled to transmembrane movement of substances; membrane; defense response to Gram-posi…	protein_coding
WBGene00004002	pgp-8	X:10859350-10864422	N2	rnp-6	OK	0.15712	1.14022	2.85937	4.96153	5e-05	0.000725861	yes	GO:0042626; GO:0006810; GO:0016021; GO:0016020; GO:0000166; GO:0016887; GO:0055085; GO:0005524	ATPase activity; integral component of membrane; ATP binding; ATPase activity, coupled to transmembrane movement of substances; membrane; nucleotide binding; transmembrane transport; transport	protein_coding
WBGene00009813	haly-1	X:10892189-10896419	N2	rnp-6	OK	29.0655	39.2836	0.434618	1.82877	0.0011	0.0105816	yes	GO:0005737; GO:1990359; GO:0006548; GO:0016829; GO:0004397; GO:0003824; GO:0019556; GO:0019557; GO:0016841; GO:0055069; GO:0006547	histidine ammonia-lyase activity; histidine metabolic process; histidine catabolic process to glutamate and formate; lyase activity; ammonia-lyase activity; cytoplasm; histidine catabolic process; histidine catabolic process to glutamate and formamide; zinc ion homeostasis; catalytic activity; stress response to zinc ion	protein_coding
WBGene00011879	pho-7	X:10938196-10941354	N2	rnp-6	OK	1.5889	0.785051	-1.01717	-1.80387	0.00385	0.0286865	yes	GO:0016311; GO:0003993	acid phosphatase activity; dephosphorylation	protein_coding
WBGene00011880	T21B6.3	X:10945153-10948970	N2	rnp-6	OK	2.78948	5.59431	1.00397	3.01157	5e-05	0.000725861	yes			protein_coding
WBGene00002124	inx-2	X:11294961-11296731	N2	rnp-6	OK	46.1867	35.1333	-0.394635	-1.58845	0.00535	0.0369777	yes	GO:0006810; GO:0016021; GO:0016020; GO:0055085; GO:0055077; GO:0005886; GO:0005243; GO:0006811; GO:0030054; GO:0005921	gap junction hemi-channel activity; transmembrane transport; gap junction; integral component of membrane; ion transport; plasma membrane; membrane; cell junction; transport; gap junction channel activity	protein_coding
WBGene00000212	asm-2	X:11321076-11324251	N2	rnp-6	OK	13.0158	8.25585	-0.656779	-2.18539	5e-05	0.000725861	yes	GO:0016787; GO:0006629; GO:0016798; GO:0005622; GO:0005576; GO:0004767; GO:0008152; GO:0006685; GO:0046872; GO:0006665; GO:0046513	hydrolase activity, acting on glycosyl bonds; sphingomyelin phosphodiesterase activity; extracellular region; intracellular; sphingomyelin catabolic process; metabolic process; hydrolase activity; metal ion binding; lipid metabolic process; sphingolipid metabolic process; ceramide biosynthetic process	protein_coding
WBGene00001790	gst-42	X:11726269-11727897	N2	rnp-6	OK	29.0074	18.8224	-0.623971	-2.086	0.0005	0.00551085	yes	GO:0005737; GO:0006572; GO:0016853; GO:0006559; GO:0016034; GO:0003824; GO:0009072; GO:0005515; GO:0042802	catalytic activity; cytoplasm; identical protein binding; L-phenylalanine catabolic process; aromatic amino acid family metabolic process; maleylacetoacetate isomerase activity; isomerase activity; tyrosine catabolic process; protein binding	protein_coding
WBGene00219571	linc-15	X:11991483-11991933	N2	rnp-6	OK	13.9539	7.95522	-0.810691	-1.60059	0.0074	0.0473757	yes
WBGene00012225	W03G11.3	X:12100191-12103801	N2	rnp-6	OK	4.19626	1.46536	-1.51785	-3.51978	5e-05	0.000725861	yes	GO:0016787; GO:0005975; GO:0016798; GO:0004560; GO:0008152; GO:0006004	alpha-L-fucosidase activity; hydrolase activity, acting on glycosyl bonds; hydrolase activity; carbohydrate metabolic process; metabolic process; fucose metabolic process	protein_coding
WBGene00023493	nspc-12	X:12356193-12356681	N2	rnp-6	OK	9.46926	1.0982	-3.10811	-4.03913	5e-05	0.000725861	yes			protein_coding
[truncated: 26 more rows]
