# Supplementary material for: Evolutionarily conserved regulation of immunity by the splicing factor RNP-6/PUF60
Source: eLife. 2020 Jun 15;9:e57591. doi: 10.7554/eLife.57591 (PMC7332298; doi:10.7554/eLife.57591)
Supplement: Figure 2—source data 2. — Infected. [file elife-57591-fig2-data2.xlsx]

## Sheet: DEG infected
ensembl_gene_id	gene	locus	sample_1	sample_2	status	value_1	value_2	log2(fold_change)	test_stat	p_value	q_value	significant	GO_id	GO_term	gene_biotype
WBGene00000227	atm-1	I:183363-208467	N2	rnp-6	OK	18.4188	23.4681	0.349521	1.82792	0.00145	0.013173	yes	GO:0006468; GO:0010212; GO:0006281; GO:0016310; GO:0005634; GO:0016301; GO:0000166; GO:0006974; GO:0004674; GO:0016740; GO:0000785; GO:0007049; GO:0005515; GO:0005524	chromatin; protein phosphorylation; cellular response to DNA damage stimulus; transferase activity; response to ionizing radiation; phosphorylation; kinase activity; nucleus; ATP binding; protein binding; DNA repair; cell cycle; protein serine/threonine kinase activity; nucleotide binding	protein_coding
WBGene00021657	Y48G1A.1	I:348534-357133	N2	rnp-6	OK	9.96173	12.6436	0.343942	1.518	0.00755	0.0480515	yes			protein_coding
WBGene00001814	haf-4	I:489983-496154	N2	rnp-6	OK	16.6438	11.0825	-0.586697	-2.57164	5e-05	0.000725861	yes	GO:0042626; GO:0006810; GO:0006629; GO:0016021; GO:0016020; GO:0035264; GO:0000166; GO:0005765; GO:0007041; GO:0016887; GO:0015833; GO:0015197; GO:0055085; GO:0005524	multicellular organism growth; lipid metabolic process; ATPase activity; integral component of membrane; peptide transport; lysosomal membrane; ATP binding; ATPase activity, coupled to transmembrane movement of substances; membrane; peptide transporter activity; nucleotide binding; transmembrane transport; transport; lysosomal transport	protein_coding
WBGene00022040	Y65B4BR.1	I:562735-565181	N2	rnp-6	OK	4.75645	2.32102	-1.03513	-2.75003	5e-05	0.000725861	yes	GO:0016788	hydrolase activity, acting on ester bonds	protein_coding
WBGene00022153	Y71G12B.13	I:1702122-1707890	N2	rnp-6	OK	34.5457	43.5416	0.333885	1.58966	0.00495	0.0348181	yes			protein_coding
WBGene00022149	lin-65	I:1755328-1766467	N2	rnp-6	OK	48.762	60.2853	0.306049	1.546	0.0068	0.044487	yes	; GO:0005634; GO:0003674; GO:0005829; GO:0034514	cytosol; mitochondrial unfolded protein response; molecular_function; nucleus;	protein_coding
WBGene00022142	Y71G12B.2	I:1816149-1818509	N2	rnp-6	OK	1.31697	2.32583	0.820529	1.63853	0.00595	0.0401087	yes			protein_coding
WBGene00022139	tub-2	I:1874146-1884173	N2	rnp-6	OK	18.0843	25.0504	0.470097	1.94623	0.0008	0.00816818	yes	; GO:0020037; GO:0035091; GO:0061512; GO:0022900; GO:0005515; GO:0005929; GO:0005506; GO:0009055	; electron transport chain; electron transfer activity; protein binding; iron ion binding; protein localization to cilium; heme binding; phosphatidylinositol binding; cilium	protein_coding
WBGene00017398	slc-17.6	I:2250130-2254901	N2	rnp-6	OK	22.4054	15.3164	-0.548768	-2.08735	0.0002	0.00250605	yes	; GO:0016021; GO:0016020; GO:0006820; GO:0022857; GO:0055085	; anion transport; integral component of membrane; transmembrane transporter activity; membrane; transmembrane transport	protein_coding
WBGene00021468	epg-2	I:2293131-2304393	N2	rnp-6	OK	126.695	89.0841	-0.508117	-1.70519	0.0042	0.0306843	yes	GO:0005737; GO:0006914; GO:0016236	cytoplasm; macroautophagy; autophagy	protein_coding
WBGene00021464	ugt-31	I:2333325-2338688	N2	rnp-6	OK	3.72333	1.63916	-1.18364	-3.14452	5e-05	0.000725861	yes	GO:0043231; GO:0016021; GO:0016020; GO:0016740; GO:0008152; GO:0016758; GO:0015020	transferase activity; membrane; integral component of membrane; metabolic process; glucuronosyltransferase activity; intracellular membrane-bounded organelle; transferase activity, transferring hexosyl groups	protein_coding
WBGene00021463	zeel-1	I:2342215-2350468	N2	rnp-6	OK	4.868	3.30482	-0.558759	-1.9915	0.00085	0.00858204	yes	GO:0016021; GO:0016020; GO:0016567; GO:0051438; GO:0031462; GO:0004842	regulation of ubiquitin-protein transferase activity; ubiquitin-protein transferase activity; membrane; protein ubiquitination; Cul2-RING ubiquitin ligase complex; integral component of membrane	protein_coding
WBGene00017732	F23C8.3	I:2438800-2442948	N2	rnp-6	OK	1.58101	0.683867	-1.20906	-1.73592	0.00575	0.0390509	yes			protein_coding
WBGene00017979	F32B5.6	I:2668159-2672429	N2	rnp-6	OK	13.305	17.8567	0.424499	1.78073	0.0019	0.0163938	yes			protein_coding
WBGene00022127	yop-1	I:2730003-2731454	N2	rnp-6	OK	173.117	213.258	0.30085	1.54966	0.00785	0.0494531	yes	GO:0016021; GO:0016020; GO:0032541; GO:0005886	cortical endoplasmic reticulum; integral component of membrane; plasma membrane; membrane	protein_coding
WBGene00020989	W03D8.8	I:2791688-2794895	N2	rnp-6	OK	0.515106	1.17126	1.18512	1.98099	0.00115	0.01096	yes	GO:0005737; GO:0006631; GO:0006637; GO:0047617; GO:0016790	acyl-CoA metabolic process; cytoplasm; fatty acid metabolic process; thiolester hydrolase activity; acyl-CoA hydrolase activity	protein_coding
WBGene00001791	gst-43	I:2901334-2903005	N2	rnp-6	OK	11.8648	5.4933	-1.11094	-3.06932	5e-05	0.000725861	yes	GO:0005737; GO:0003824; GO:0016740; GO:0009072; GO:0005515	aromatic amino acid family metabolic process; transferase activity; protein binding; catalytic activity; cytoplasm	protein_coding
WBGene00021039	W05F2.7	I:3352462-3359433	N2	rnp-6	OK	0.776646	0.483323	-0.684269	-1.60074	0.00735	0.0471344	yes			protein_coding
WBGene00019361	K03E5.2	I:3419599-3424211	N2	rnp-6	OK	17.0506	23.8615	0.484858	1.58203	0.006	0.0403716	yes			protein_coding
WBGene00020900	T28F2.1	I:3639647-3641391	N2	rnp-6	OK	1.86808	0.420386	-2.15177	-3.24962	0.0001	0.00135972	yes	GO:0036065; GO:0008107; GO:0005975; GO:0016021; GO:0016020; GO:0043413; GO:0016757	transferase activity, transferring glycosyl groups; galactoside 2-alpha-L-fucosyltransferase activity; macromolecule glycosylation; carbohydrate metabolic process; membrane; fucosylation; integral component of membrane	protein_coding
WBGene00003797	npp-11	I:3817995-3821503	N2	rnp-6	OK	64.6147	79.5101	0.299275	1.59233	0.00605	0.0406593	yes	GO:0006997; GO:0005543; GO:0000132; GO:0071426; GO:0005643; GO:0044613; GO:0005635; GO:0006606; GO:0043657; GO:0009792; GO:0005515; GO:0005487; GO:0017056	nuclear pore activity; nuclear envelope; embryo development ending in birth or egg hatching; protein binding; structural constituent of nuclear pore; ribonucleoprotein complex export from nucleus; nucleus organization; nuclear pore central transport channel; protein import into nucleus; host cell; establishment of mitotic spindle orientation; phospholipid binding; nuclear pore	protein_coding
WBGene00016836	C50F2.2	I:3881827-3891518	N2	rnp-6	OK	26.051	34.2328	0.394045	1.89581	0.0013	0.0120757	yes			protein_coding
WBGene00000779	cpn-3	I:3987890-3988702	N2	rnp-6	OK	99.4919	132.217	0.410254	1.9662	0.00025	0.00303907	yes	GO:0030016; GO:0005515	protein binding; myofibril	protein_coding
WBGene00006820	unc-89	I:4035743-4090961	N2	rnp-6	OK	11.4558	20.0102	0.804663	3.34466	5e-05	0.000725861	yes	GO:0005089; GO:0031034; GO:0030241; GO:0017048; GO:0014722; GO:0010628; GO:0045989; GO:0035023; GO:0090736; GO:0005737; GO:0031430; GO:0043547; GO:0031672; GO:0071688; GO:0016740; GO:0004672; GO:0005524; GO:0006468; GO:0034613; GO:0019902; GO:0045214; GO:0060298; GO:0040017; GO:1905552; GO:0005622; GO:0005515; GO:1905905	cytoplasm; positive regulation of sarcomere organization; myosin filament assembly; protein binding; intracellular; positive regulation of GTPase activity; protein kinase activity; ATP binding; cellular protein localization; regulation of Rho protein signal transduction; positive regulation of protein localization to endoplasmic reticulum; M band; striated muscle myosin thick filament assembly; M…	protein_coding
WBGene00016064	acd-1	I:4103712-4108045	N2	rnp-6	OK	0.751383	1.53963	1.03496	2.33299	0.00015	0.00195025	yes	GO:0006810; GO:0005272; GO:0010447; GO:0016021; GO:0016020; GO:0006814; GO:0035725; GO:0006811; GO:0031224	response to acidic pH; sodium ion transmembrane transport; ion transport; sodium ion transport; membrane; sodium channel activity; intrinsic component of membrane; integral component of membrane; transport	protein_coding
WBGene00002138	inx-16	I:4162034-4165015	N2	rnp-6	OK	20.308	15.4511	-0.394343	-1.64177	0.0043	0.0312605	yes	GO:0006810; GO:0019722; GO:0016021; GO:0016020; GO:0055085; GO:2000746; GO:1900073; GO:0055077; GO:0005886; GO:0005622; GO:0005243; GO:0006811; GO:0030054; GO:0005921	regulation of defecation rhythm; gap junction hemi-channel activity; transmembrane transport; gap junction; regulation of neuromuscular synaptic transmission; intracellular; integral component of membrane; ion transport; plasma membrane; membrane; calcium-mediated signaling; cell junction; transport; gap junction channel activity	protein_coding
WBGene00002139	inx-17	I:4165134-4167059	N2	rnp-6	OK	10.4018	6.95507	-0.580701	-1.97847	0.0008	0.00816818	yes	GO:0006810; GO:0016021; GO:0016020; GO:0055085; GO:0008150; GO:0055077; GO:0005886; GO:0005243; GO:0006811; GO:0030054; GO:0005921	gap junction hemi-channel activity; transmembrane transport; gap junction; biological_process; integral component of membrane; ion transport; plasma membrane; membrane; cell junction; transport; gap junction channel activity	protein_coding
WBGene00003516	nab-1	I:4229576-4236039	N2	rnp-6	OK	8.1718	4.30845	-0.923484	-3.22469	5e-05	0.000725861	yes	GO:0001725; GO:0036062; GO:0048786; GO:0051015; GO:0030864; GO:0005515; GO:0005886; GO:0007416	actin filament binding; presynaptic periactive zone; cortical actin cytoskeleton; stress fiber; protein binding; presynaptic active zone; plasma membrane; synapse assembly	protein_coding
WBGene00016603	met-1	I:4254379-4264683	N2	rnp-6	OK	34.3234	44.9805	0.390106	2.05672	0.00055	0.00597832	yes	GO:0018024; GO:0040027; GO:0000122; GO:0005634; GO:0016740; GO:0005515; GO:0051567; GO:0008168; GO:0032259; GO:0010452	histone H3-K9 methylation; negative regulation of transcription from RNA polymerase II promoter; methylation; transferase activity; methyltransferase activity; nucleus; protein binding; histone H3-K36 methylation; histone-lysine N-methyltransferase activity; negative regulation of vulval development	protein_coding
WBGene00016601	acin-1	I:4270645-4273332	N2	rnp-6	OK	61.4224	75.8792	0.30494	1.58665	0.00625	0.0416482	yes	GO:0035262; GO:0030334; GO:0003723; GO:0003676	RNA binding; gonad morphogenesis; regulation of cell migration; nucleic acid binding	protein_coding
WBGene00000140	anc-1	I:4321094-4359105	N2	rnp-6	OK	15.8084	20.4378	0.370552	1.98493	0.00045	0.00504819	yes	GO:0005856; GO:0005737; GO:0005635; GO:0007010; GO:0006997; GO:0035046; GO:0005634; GO:0016020; GO:0051179; GO:0003779; GO:0005515; GO:0051647; GO:0005640; GO:0051087; GO:0048471; GO:0016021	nuclear envelope; cytoskeleton organization; actin binding; cytoplasm; localization; nuclear outer membrane; nucleus localization; nucleus organization; nucleus; pronuclear migration; membrane; protein binding; cytoskeleton; perinuclear region of cytoplasm; integral component of membrane; chaperone binding	protein_coding
WBGene00016653	C44E4.4	I:4634102-4635630	N2	rnp-6	OK	210.376	267.051	0.344146	1.83525	0.0017	0.0149637	yes	GO:0006396; GO:0005634; GO:0003723; GO:0003676; GO:0030529	RNA processing; RNA binding; nucleus; intracellular ribonucleoprotein complex; nucleic acid binding	protein_coding
WBGene00170884	C44E4.4	I:4634102-4635630	N2	rnp-6	OK	210.376	267.051	0.344146	1.83525	0.0017	0.0149637	yes
WBGene00020212	T04D1.2	I:4679670-4682755	N2	rnp-6	OK	2.04582	1.11638	-0.873846	-1.77202	0.0043	0.0312605	yes	GO:0005515	protein binding	protein_coding
WBGene00018797	F54D7.2	I:4805606-4809675	N2	rnp-6	OK	76.1239	57.0689	-0.415643	-2.0835	0.0003	0.00356315	yes	GO:0016021; GO:0016020; GO:0016780; GO:0008654	phospholipid biosynthetic process; phosphotransferase activity, for other substituted phosphate groups; integral component of membrane; membrane	protein_coding
WBGene00018862	wago-2	I:5368477-5372643	N2	rnp-6	OK	45.5715	62.6427	0.459014	2.40011	0.0001	0.00135972	yes
WBGene00015633	C09D4.2	I:5491473-5493531	N2	rnp-6	OK	28.4389	15.9595	-0.833444	-3.17296	5e-05	0.000725861	yes			protein_coding
WBGene00004224	ptr-10	I:5662142-5668837	N2	rnp-6	OK	0.709679	0.220017	-1.68955	-2.83405	5e-05	0.000725861	yes	GO:0016021; GO:0016020; GO:0018996	molting cycle, collagen and cuticulin-based cuticle; integral component of membrane; membrane	protein_coding
WBGene00000493	che-14	I:5746724-5754278	N2	rnp-6	OK	0.648245	0.234104	-1.46939	-2.58129	0.0004	0.00457121	yes	GO:0016324; GO:0016021; GO:0016020; GO:0007224	apical plasma membrane; integral component of membrane; smoothened signaling pathway; membrane	protein_coding
WBGene00020693	lron-8	I:5768962-5773626	N2	rnp-6	OK	2.98967	1.79317	-0.73747	-1.80559	0.00265	0.0213265	yes	; GO:0005615; GO:0016021; GO:0016020; GO:0007409; GO:0005578	; extracellular space; axonogenesis; membrane; proteinaceous extracellular matrix; integral component of membrane	protein_coding
WBGene00016419	tyr-4	I:5898302-5904689	N2	rnp-6	OK	14.8456	8.87932	-0.741514	-1.61612	0.0061	0.040891	yes	GO:0046872; GO:0055114; GO:0008152; GO:0016491	metabolic process; metal ion binding; oxidoreductase activity; oxidation-reduction process	protein_coding
WBGene00001819	haf-9	I:6081781-6085962	N2	rnp-6	OK	21.7826	14.0733	-0.630214	-2.88864	5e-05	0.000725861	yes	GO:0042626; GO:0006810; GO:0035264; GO:0016021; GO:0016020; GO:0015833; GO:0000166; GO:0005765; GO:0007041; GO:0016887; GO:0015197; GO:0016246; GO:0055085; GO:0005524	multicellular organism growth; RNA interference; lysosomal transport; ATPase activity; integral component of membrane; peptide transport; lysosomal membrane; ATP binding; ATPase activity, coupled to transmembrane movement of substances; membrane; peptide transporter activity; nucleotide binding; transmembrane transport; transport	protein_coding
WBGene00003878	pept-3	I:6133284-6137980	N2	rnp-6	OK	10.7118	7.13907	-0.585393	-2.3671	5e-05	0.000725861	yes	GO:0006857; GO:0042938; GO:0006810; GO:0015992; GO:0005215; GO:0016021; GO:0016020; GO:0042936; GO:0015833; GO:0015252; GO:0015198; GO:0015031	transporter activity; oligopeptide transporter activity; oligopeptide transport; membrane; dipeptide transporter activity; proton transport; dipeptide transport; peptide transport; protein transport; integral component of membrane; transport; proton channel activity	protein_coding
WBGene00020258	T05E7.1	I:6203896-6206929	N2	rnp-6	OK	4.45361	1.67591	-1.41003	-3.70345	5e-05	0.000725861	yes	GO:0005737; GO:0006631; GO:0006637; GO:0047617; GO:0016790	acyl-CoA metabolic process; cytoplasm; fatty acid metabolic process; thiolester hydrolase activity; acyl-CoA hydrolase activity	protein_coding
WBGene00016752	C48E7.7	I:6234718-6235343	N2	rnp-6	OK	3.52112	7.23744	1.03944	2.30665	0.0002	0.00250605	yes			protein_coding
WBGene00004068	pnk-1	I:6294895-6297636	N2	rnp-6	OK	55.4754	74.1782	0.419148	2.10858	0.0004	0.00457121	yes	GO:0016310; GO:0016301; GO:0004594; GO:0005524; GO:0015937	kinase activity; coenzyme A biosynthetic process; pantothenate kinase activity; ATP binding; phosphorylation	protein_coding
WBGene00017816	F26B1.2	I:6317700-6323993	N2	rnp-6	OK	121.67	98.0323	-0.311643	-1.49372	0.0077	0.0487669	yes	GO:0005515; GO:0006357; GO:0030529; GO:0006974; GO:0009792; GO:0019013; GO:0003723; GO:0003676; GO:0003677; GO:0006396	nucleic acid binding; embryo development ending in birth or egg hatching; cellular response to DNA damage stimulus; RNA binding; DNA binding; intracellular ribonucleoprotein complex; RNA processing; viral nucleocapsid; protein binding; regulation of transcription from RNA polymerase II promoter	protein_coding
WBGene00019395	K04F10.2	I:6360843-6364060	N2	rnp-6	OK	0.665789	0.310619	-1.09992	-1.66999	0.0075	0.0478343	yes	GO:0005856; GO:0005737; GO:0042995	cytoplasm; cytoskeleton; cell projection	protein_coding
WBGene00022591	cuti-1	I:6404586-6405706	N2	rnp-6	OK	4.20141	1.26273	-1.73433	-3.16456	5e-05	0.000725861	yes	GO:0005737; GO:0016021; GO:0016020	cytoplasm; integral component of membrane; membrane	protein_coding
WBGene00016943	acdh-1	I:6497437-6499559	N2	rnp-6	OK	109.456	146.426	0.419824	2.17429	0.00015	0.00195025	yes	GO:0050660; GO:0045087; GO:0050829; GO:0008152; GO:0003995; GO:0016627; GO:0055114; GO:0016491	oxidoreductase activity, acting on the CH-CH group of donors; innate immune response; oxidoreductase activity; flavin adenine dinucleotide binding; metabolic process; oxidation-reduction process; defense response to Gram-negative bacterium; acyl-CoA dehydrogenase activity	protein_coding
WBGene00016942	C55B7.3	I:6499840-6501413	N2	rnp-6	OK	1.56712	2.86297	0.869398	2.10483	0.00045	0.00504819	yes	GO:0016787; GO:0016791; GO:0016311; GO:0006470; GO:0004725; GO:0004721; GO:0035335	protein tyrosine phosphatase activity; peptidyl-tyrosine dephosphorylation; phosphatase activity; hydrolase activity; phosphoprotein phosphatase activity; dephosphorylation; protein dephosphorylation	protein_coding
WBGene00022633	ZC581.3	I:6651219-6655429	N2	rnp-6	OK	15.409	10.6097	-0.538387	-2.30502	5e-05	0.000725861	yes	GO:0016021; GO:0016020	integral component of membrane; membrane	protein_coding
WBGene00001075	dpy-14	I:6843594-6845136	N2	rnp-6	OK	78.2928	28.9887	-1.43339	-6.33193	5e-05	0.000725861	yes	GO:0016021; GO:0016020; GO:0005581; GO:0042302	structural constituent of cuticle; collagen trimer; integral component of membrane; membrane	protein_coding
WBGene00001595	gld-1	I:7695660-7698154	N2	rnp-6	OK	231.254	282.06	0.286523	1.55261	0.0074	0.0473757	yes	GO:0030154; GO:0010629; GO:0003676; GO:0048027; GO:0007275; GO:0005737; GO:0043186; GO:0060282; GO:1905936; GO:0003730; GO:0048477; GO:0010468; GO:2000196; GO:2000623; GO:0051321; GO:0005829; GO:0030716; GO:0003727; GO:0003723; GO:0005515; GO:0017148; GO:0006417	cytosol; RNA binding; oocyte fate determination; negative regulation of nuclear-transcribed mRNA catabolic process, nonsense-mediated decay; P granule; negative regulation of gene expression; regulation of germ cell proliferation; protein binding; positive regulation of oocyte development; single-stranded RNA binding; negative regulation of translation; cytoplasm; multicellular organism developme…	protein_coding
WBGene00006844	unc-120	I:8460224-8463014	N2	rnp-6	OK	11.5725	7.64751	-0.597641	-2.0838	0.00035	0.00407043	yes	GO:0005634; GO:0006355; GO:0045944; GO:0006351; GO:0003677; GO:0000987; GO:0046983; GO:0000982	regulation of transcription, DNA-templated; transcription factor activity, RNA polymerase II proximal promoter sequence-specific DNA binding; DNA binding; protein dimerization activity; nucleus; positive regulation of transcription from RNA polymerase II promoter; proximal promoter sequence-specific DNA binding; transcription, DNA-templated	protein_coding
WBGene00006618	trt-1	I:8768324-8771251	N2	rnp-6	OK	41.4234	32.7906	-0.337165	-1.62118	0.0052	0.0361513	yes	GO:0000333; GO:0042162; GO:0003677; GO:0070034; GO:0003721; GO:0003964; GO:0007004	telomeric DNA binding; RNA-directed DNA polymerase activity; telomerase catalytic core complex; DNA binding; telomere maintenance via telomerase; telomerase RNA reverse transcriptase activity; telomerase RNA binding	protein_coding
WBGene00009476	F36F2.2	I:9016796-9017994	N2	rnp-6	OK	38.4389	23.7019	-0.697564	-2.86003	5e-05	0.000725861	yes			protein_coding
WBGene00007533	cbl-1	I:9327856-9330930	N2	rnp-6	OK	12.2958	5.57381	-1.14143	-4.06342	5e-05	0.000725861	yes	GO:0005737; GO:0019346; GO:0004121; GO:0016829; GO:0071266; GO:0003824; GO:0019343; GO:0030170; GO:0004123; GO:0003962	cysteine biosynthetic process via cystathionine; pyridoxal phosphate binding; lyase activity; cytoplasm; 'de novo' L-methionine biosynthetic process; cystathionine beta-lyase activity; cystathionine gamma-lyase activity; cystathionine gamma-synthase activity; transsulfuration; catalytic activity	protein_coding
WBGene00219313	C17E4.20	I:9414455-9416702	N2	rnp-6	OK	34.1671	26.6408	-0.358971	-1.67071	0.00435	0.0315234	yes			protein_coding
WBGene00006681	twk-29	I:9463759-9468917	N2	rnp-6	OK	2.67143	0.982036	-1.44376	-3.26832	5e-05	0.000725861	yes	GO:0005267; GO:0006810; GO:0071805; GO:0016021; GO:0016020; GO:0030322; GO:0005887; GO:0022841; GO:0006811	integral component of plasma membrane; potassium ion transmembrane transport; ion transport; potassium channel activity; stabilization of membrane potential; membrane; potassium ion leak channel activity; integral component of membrane; transport	protein_coding
WBGene00045473	F30A10.14	I:9476604-9477089	N2	rnp-6	OK	20.8527	14.3577	-0.538406	-1.54893	0.0075	0.0478343	yes			protein_coding
WBGene00011495	T05F1.11	I:9653100-9657040	N2	rnp-6	OK	2.53964	1.78564	-0.508179	-1.59574	0.0067	0.0439419	yes	GO:0005737; GO:0098869; GO:0045454; GO:0004791	cytoplasm; thioredoxin-disulfide reductase activity; cellular oxidant detoxification; cell redox homeostasis	protein_coding
WBGene00003652	nhr-62	I:9839597-9844810	N2	rnp-6	OK	2.6759	5.64667	1.07738	3.34644	5e-05	0.000725861	yes	; GO:0043565; GO:0003700; GO:0005634; GO:0003707; GO:0006355; GO:0008270; GO:0043401; GO:0003677; GO:0046872; GO:0006351	; steroid hormone mediated signaling pathway; regulation of transcription, DNA-templated; DNA binding; zinc ion binding; nucleus; metal ion binding; sequence-specific DNA binding; transcription, DNA-templated; steroid hormone receptor activity; DNA binding transcription factor activity	protein_coding
WBGene00009743	sptf-1	I:10366620-10371694	N2	rnp-6	OK	8.83159	5.14572	-0.7793	-2.40079	0.0001	0.00135972	yes	GO:0005634; GO:0006357; GO:0000981; GO:0003676	regulation of transcription from RNA polymerase II promoter; nucleic acid binding; nucleus; RNA polymerase II transcription factor activity, sequence-specific DNA binding	protein_coding
WBGene00003847	blmp-1	I:10409358-10414707	N2	rnp-6	OK	1.46151	0.602303	-1.2789	-2.92745	5e-05	0.000725861	yes	GO:0005737; GO:1903355; GO:0005515; GO:0000122; GO:0005634; GO:0043053; GO:0001158; GO:0006355; GO:0045944; GO:0006351; GO:0003676; GO:0008340; GO:0046872; GO:0007275; GO:0040035; GO:0045684	nucleic acid binding; negative regulation of transcription from RNA polymerase II promoter; dauer entry; enhancer sequence-specific DNA binding; negative regulation of distal tip cell migration; cytoplasm; positive regulation of epidermis development; nucleus; metal ion binding; positive regulation of transcription from RNA polymerase II promoter; regulation of transcription, DNA-templated; prote…	protein_coding
WBGene00013716	Y106G6H.1	I:10429671-10432336	N2	rnp-6	OK	11.4304	6.41924	-0.832395	-2.98892	5e-05	0.000725861	yes			protein_coding
WBGene00077764	F59C6.16	I:10506999-10515506	N2	rnp-6	OK	57.7869	32.9463	-0.810626	-1.86565	0.0015	0.0135324	yes			protein_coding
WBGene00002248	lam-3	I:10608465-10621428	N2	rnp-6	OK	14.5166	7.85528	-0.885972	-4.43167	5e-05	0.000725861	yes	GO:0005604; GO:0005515	protein binding; basement membrane	protein_coding
WBGene00015230	tag-344	I:10644283-10645617	N2	rnp-6	OK	1.2355	0.533245	-1.21223	-1.96058	0.0018	0.0156835	yes	GO:0005737; GO:0006468; GO:0005634; GO:0000166; GO:0004674; GO:0004672; GO:0035556; GO:0005524	intracellular signal transduction; protein phosphorylation; cytoplasm; protein kinase activity; nucleus; ATP binding; protein serine/threonine kinase activity; nucleotide binding	protein_coding
WBGene00015229	fbxa-125	I:10646761-10647777	N2	rnp-6	OK	1.2649	0.390425	-1.6959	-2.20948	0.002	0.017068	yes			protein_coding
WBGene00001432	fkb-7	I:10667954-10671016	N2	rnp-6	OK	6.13361	2.4256	-1.33839	-3.41439	5e-05	0.000725861	yes	GO:0005737; GO:0000413; GO:0006457; GO:0016853; GO:0005528; GO:0003755; GO:0061077	peptidyl-prolyl cis-trans isomerase activity; protein peptidyl-prolyl isomerization; cytoplasm; protein folding; isomerase activity; chaperone-mediated protein folding; FK506 binding	protein_coding
WBGene00016458	C35E7.6	I:10817359-10819109	N2	rnp-6	OK	25.7251	17.5146	-0.554615	-2.2917	0.00015	0.00195025	yes	GO:0005737	cytoplasm	protein_coding
WBGene00007766	C27C7.1	I:11439286-11440710	N2	rnp-6	OK	42.6815	25.6263	-0.735985	-3.23079	5e-05	0.000725861	yes			protein_coding
WBGene00014992	ZK1025.1	I:11443451-11446644	N2	rnp-6	OK	1.36805	2.04818	0.582221	1.75494	0.00335	0.0256524	yes
WBGene00011936	pgrn-1	I:11701630-11703704	N2	rnp-6	OK	21.1921	13.3256	-0.669324	-2.63482	5e-05	0.000725861	yes	GO:0016021; GO:0016020	integral component of membrane; membrane	protein_coding
WBGene00013135	rga-2	I:11979439-11985655	N2	rnp-6	OK	2.07622	1.03228	-1.00813	-2.77851	5e-05	0.000725861	yes	GO:0005096; GO:0007165; GO:0005515; GO:0043547	protein binding; signal transduction; GTPase activator activity; positive regulation of GTPase activity	protein_coding
WBGene00008787	F14B6.6	I:12232688-12235104	N2	rnp-6	OK	2.78966	1.69383	-0.719801	-1.58146	0.0067	0.0439419	yes	GO:0005794; GO:0006486; GO:0016021; GO:0016020; GO:0000139; GO:0016740; GO:0008378; GO:0016757	transferase activity, transferring glycosyl groups; protein glycosylation; Golgi apparatus; transferase activity; Golgi membrane; galactosyltransferase activity; membrane; integral component of membrane	protein_coding
WBGene00010769	asah-1	I:12505097-12508064	N2	rnp-6	OK	27.0265	18.9285	-0.513816	-2.18813	0.00025	0.00303907	yes	GO:0005764; GO:0016787; GO:0006629; GO:0017040; GO:0006665	hydrolase activity; ceramidase activity; sphingolipid metabolic process; lipid metabolic process; lysosome	protein_coding
WBGene00010770	K11D2.4	I:12519193-12527553	N2	rnp-6	OK	5.23455	7.46624	0.512318	1.52327	0.00705	0.0457217	yes	GO:0003676	nucleic acid binding	protein_coding
WBGene00012195	bath-34	I:12749889-12752067	N2	rnp-6	OK	6.77805	9.4864	0.484989	1.69128	0.00385	0.0286865	yes	; GO:0005515	; protein binding	protein_coding
WBGene00008566	F08A8.4,acox-3	I:12946946-12955216	N2	rnp-6	OK	1.81416	3.14884	0.79552	2.11543	0.0005	0.00551085	yes	GO:0006631; GO:0050660; GO:0006635; GO:0033539; GO:0016627; GO:0005777; GO:1904070; GO:0071949; GO:0008152; GO:0003995; GO:0003997; GO:0055114	oxidoreductase activity, acting on the CH-CH group of donors; fatty acid beta-oxidation using acyl-CoA dehydrogenase; ascaroside biosynthetic process; fatty acid metabolic process; flavin adenine dinucleotide binding; FAD binding; metabolic process; oxidation-reduction process; peroxisome; fatty acid beta-oxidation; acyl-CoA oxidase activity; acyl-CoA dehydrogenase activity	protein_coding
WBGene00008567	F08A8.4,acox-3	I:12946946-12955216	N2	rnp-6	OK	1.81416	3.14884	0.79552	2.11543	0.0005	0.00551085	yes	GO:0006631; GO:0050660; GO:0006635; GO:0033539; GO:0016627; GO:0005777; GO:0071949; GO:0008152; GO:0003995; GO:0003997; GO:0055114	oxidoreductase activity, acting on the CH-CH group of donors; fatty acid beta-oxidation using acyl-CoA dehydrogenase; fatty acid metabolic process; flavin adenine dinucleotide binding; FAD binding; metabolic process; oxidation-reduction process; peroxisome; fatty acid beta-oxidation; acyl-CoA oxidase activity; acyl-CoA dehydrogenase activity	protein_coding
WBGene00009065	F22G12.5	I:13162498-13182808	N2	rnp-6	OK	16.5878	20.8575	0.330439	1.70338	0.00305	0.0238181	yes	GO:0007264; GO:0005085; GO:0043547; GO:0005622	small GTPase mediated signal transduction; intracellular; guanyl-nucleotide exchange factor activity; positive regulation of GTPase activity	protein_coding
WBGene00011432	sdz-30	I:13306204-13308786	N2	rnp-6	OK	19.8062	13.1636	-0.589393	-2.54522	5e-05	0.000725861	yes	GO:0005737	cytoplasm	protein_coding
WBGene00005010	spr-5	I:13438065-13450218	N2	rnp-6	OK	37.0577	45.6847	0.301938	1.53424	0.007	0.0454744	yes	GO:0005737; GO:0050660; GO:0034720; GO:0005634; GO:0040029; GO:0006355; GO:0034648; GO:0006351; GO:0005515; GO:0003677; GO:0016569; GO:0055114; GO:0016491	covalent chromatin modification; cytoplasm; DNA binding; regulation of gene expression, epigenetic; oxidoreductase activity; flavin adenine dinucleotide binding; histone demethylase activity (H3-dimethyl-K4 specific); nucleus; oxidation-reduction process; regulation of transcription, DNA-templated; protein binding; transcription, DNA-templated; histone H3-K4 demethylation	protein_coding
WBGene00003585	ndx-8	I:13503044-13507054	N2	rnp-6	OK	2.70396	1.26888	-1.09152	-1.97915	0.00225	0.0187814	yes	GO:0016787; GO:0016289; GO:0005778; GO:0015938; GO:0016021; GO:0016020; GO:0005777; GO:0047994; GO:0043229; GO:0004778; GO:0003986; GO:0046872	hydroxymethylglutaryl-CoA hydrolase activity; CoA hydrolase activity; hydrolase activity; membrane; coenzyme A catabolic process; succinyl-CoA hydrolase activity; intracellular organelle; metal ion binding; peroxisome; acetyl-CoA hydrolase activity; integral component of membrane; peroxisomal membrane	protein_coding
WBGene00012231	W04A4.2	I:13682421-13684340	N2	rnp-6	OK	16.1345	11.7211	-0.461045	-1.71364	0.0035	0.0265526	yes			protein_coding
WBGene00045077	Y71A12B.12	I:13997362-14008471	N2	rnp-6	OK	10.3834	6.66579	-0.639426	-2.38051	0.00015	0.00195025	yes
WBGene00013509	Y71A12B.12	I:13997362-14008471	N2	rnp-6	OK	10.3834	6.66579	-0.639426	-2.38051	0.00015	0.00195025	yes	; GO:0005488	; binding	protein_coding
WBGene00195916	Y71A12B.12	I:13997362-14008471	N2	rnp-6	OK	10.3834	6.66579	-0.639426	-2.38051	0.00015	0.00195025	yes
WBGene00009824	gpdh-1	I:14075835-14082536	N2	rnp-6	OK	13.8961	21.9299	0.658224	2.10687	0.0007	0.00728567	yes	GO:0004367; GO:0005975; GO:0009331; GO:0016616; GO:0046168; GO:0051287; GO:0004368; GO:0006072; GO:0042803; GO:0055114; GO:0016491	glycerol-3-phosphate dehydrogenase [NAD+] activity; protein homodimerization activity; glycerol-3-phosphate metabolic process; carbohydrate metabolic process; oxidoreductase activity; glycerol-3-phosphate catabolic process; oxidoreductase activity, acting on the CH-OH group of donors, NAD or NADP as acceptor; glycerol-3-phosphate dehydrogenase complex; oxidation-reduction process; glycerol-3-phos…	protein_coding
WBGene00013404	fbxb-101	I:14088093-14089858	N2	rnp-6	OK	2.92282	1.25836	-1.21582	-2.41831	0.00035	0.00407043	yes			protein_coding
WBGene00007992	fipr-24	I:14157627-14158078	N2	rnp-6	OK	10.0547	22.3293	1.15107	3.12768	5e-05	0.000725861	yes			protein_coding
WBGene00013198	Y54E5A.2	I:14694169-14700349	N2	rnp-6	OK	1.86119	1.15545	-0.687774	-1.65809	0.0047	0.0334361	yes	GO:0016021; GO:0016020	integral component of membrane; membrane	protein_coding
WBGene00004237	ptr-23	I:14909239-14913073	N2	rnp-6	OK	10.7625	7.57918	-0.505905	-2.19277	0.0003	0.00356315	yes	GO:0045138; GO:0016021; GO:0016020; GO:0006897; GO:0018996	endocytosis; molting cycle, collagen and cuticulin-based cuticle; integral component of membrane; nematode male tail tip morphogenesis; membrane	protein_coding
WBGene00013970	klu-1	I:14975418-14980586	N2	rnp-6	OK	0.765664	1.38719	0.857382	1.83621	0.0022	0.0184426	yes	GO:0003676	nucleic acid binding	protein_coding
WBGene00013969	tep-1	I:14993820-15001680	N2	rnp-6	OK	15.3191	21.7788	0.507593	2.34044	5e-05	0.000725861	yes	GO:0010951; GO:0005576; GO:0005615; GO:0004866	extracellular region; extracellular space; endopeptidase inhibitor activity; negative regulation of endopeptidase activity	protein_coding
WBGene00044997	tep-1	I:14993820-15001680	N2	rnp-6	OK	15.3191	21.7788	0.507593	2.34044	5e-05	0.000725861	yes
WBGene00004512	rrn-1.1	I:15062082-15063836	N2	rnp-6	OK	17.6516	2.02513	-3.12372	-8.16384	5e-05	0.000725861	yes
WBGene00004622	rrn-3.1	I:15064837-15068355	N2	rnp-6	OK	939.973	1353.42	0.525916	2.45162	0.0001	0.00135972	yes
WBGene00004513	rrn-1.2	I:15069279-15071033	N2	rnp-6	OK	1.70298	4.5142	1.40641	4.04956	5e-05	0.000725861	yes
WBGene00001725	grl-16	I:572176-575119	N2	rnp-6	OK	0.177684	1.16854	2.71732	3.19187	5e-05	0.000725861	yes			protein_coding
WBGene00022029	Y65B4A.6	I:631054-636350	N2	rnp-6	OK	106.405	145.732	0.453755	2.36269	5e-05	0.000725861	yes	GO:0005737; GO:0016787; GO:0010501; GO:0008380; GO:0005730; GO:0071013; GO:0004004; GO:0000166; GO:0003676; GO:0004386; GO:0010468; GO:0005524	nucleic acid binding; nucleolus; ATP-dependent RNA helicase activity; catalytic step 2 spliceosome; hydrolase activity; cytoplasm; RNA splicing; regulation of gene expression; ATP binding; helicase activity; nucleotide binding; RNA secondary structure unwinding	protein_coding
WBGene00021209	hgap-1	I:700273-715850	N2	rnp-6	OK	14.6848	20.1129	0.453801	2.15082	5e-05	0.000725861	yes	GO:0005737; GO:0051056; GO:0043547; GO:0005096; GO:0005488; GO:0008340	cytoplasm; binding; positive regulation of GTPase activity; GTPase activator activity; regulation of small GTPase mediated signal transduction; determination of adult lifespan	protein_coding
WBGene00022519	ZC123.4	I:837995-846763	N2	rnp-6	OK	4.12153	2.31305	-0.833384	-2.34598	5e-05	0.000725861	yes	GO:0006468; GO:0030332; GO:0051726; GO:0005829; GO:0004672; GO:0004693; GO:0005634; GO:0005524	protein phosphorylation; cytosol; cyclin binding; protein kinase activity; regulation of cell cycle; nucleus; ATP binding; cyclin-dependent protein serine/threonine kinase activity	protein_coding
WBGene00022391	Y95B8A.12	I:912414-926877	N2	rnp-6	OK	0.605426	1.21256	1.00203	1.9942	0.0003	0.00356315	yes	GO:0005089; GO:0043547; GO:0035023	Rho guanyl-nucleotide exchange factor activity; regulation of Rho protein signal transduction; positive regulation of GTPase activity	protein_coding
WBGene00001707	grh-1	I:1259488-1268155	N2	rnp-6	OK	2.86455	1.8261	-0.649541	-1.61826	0.0062	0.0413837	yes	GO:0003700; GO:0043565; GO:0005634; GO:0006357;	regulation of transcription from RNA polymerase II promoter; ; nucleus; DNA binding transcription factor activity; sequence-specific DNA binding	protein_coding
WBGene00044897	M01D7.9	I:1851680-1852280	N2	rnp-6	OK	1.0127	0	-inf		5e-05	0.000725861	yes	GO:0003727; GO:0005634; GO:0000381	regulation of alternative mRNA splicing, via spliceosome; single-stranded RNA binding; nucleus	protein_coding
WBGene00021279	Y23H5B.8	I:2546896-2548327	N2	rnp-6	OK	3.68883	1.10086	-1.74453	-2.82376	0.0001	0.00135972	yes			protein_coding
WBGene00000788	cpz-1	I:2686638-2689473	N2	rnp-6	OK	196.281	127.357	-0.624046	-2.96213	5e-05	0.000725861	yes	GO:0040025; GO:0005615; GO:0051603; GO:0004197; GO:0035262; GO:0009792; GO:0005764; GO:0040032; GO:0006508; GO:0060102; GO:0008234; GO:0042395	extracellular space; embryo development ending in birth or egg hatching; lysosome; post-embryonic body morphogenesis; collagen and cuticulin-based cuticle extracellular matrix; vulval development; cysteine-type endopeptidase activity; gonad morphogenesis; proteolysis involved in cellular protein catabolic process; ecdysis, collagen and cuticulin-based cuticle; proteolysis; cysteine-type peptidase…	protein_coding
WBGene00045387	K09H9.8	I:3138538-3140601	N2	rnp-6	OK	11.6452	7.60427	-0.614852	-1.80727	0.0025	0.0203879	yes	GO:0016021; GO:0016020	integral component of membrane; membrane	protein_coding
WBGene00019598	K09H9.7	I:3150408-3152003	N2	rnp-6	OK	3.8697	11.6068	1.58468	4.666	5e-05	0.000725861	yes	GO:0003676	nucleic acid binding	protein_coding
WBGene00021035	W05F2.3	I:3367638-3368552	N2	rnp-6	OK	272.459	333.454	0.291453	1.54011	0.00625	0.0416482	yes	GO:0016021; GO:0016020	integral component of membrane; membrane	protein_coding
WBGene00004389	rnp-6	I:3533993-3546904	N2	rnp-6	OK	82.078	113.594	0.468816	1.94153	0.00065	0.0068644	yes	GO:0003723; GO:0003676	RNA binding; nucleic acid binding	protein_coding
WBGene00003060	lpd-3	I:3564063-3600677	N2	rnp-6	OK	29.0515	37.7413	0.37753	1.97731	0.00085	0.00858204	yes	GO:0016021; GO:0016020	integral component of membrane; membrane	protein_coding
WBGene00000368	ccb-1	I:3641704-3647009	N2	rnp-6	OK	12.5949	5.36334	-1.23164	-4.6384	5e-05	0.000725861	yes	GO:0051924; GO:0040017; GO:0008331; GO:0048786; GO:0070588; GO:0007528; GO:0005891; GO:0061199; GO:0005515; GO:0007268; GO:1901385; GO:0005245	regulation of calcium ion transport; neuromuscular junction development; voltage-gated calcium channel activity; protein binding; presynaptic active zone; calcium ion transmembrane transport; positive regulation of locomotion; chemical synaptic transmission; regulation of voltage-gated calcium channel activity; striated muscle contraction involved in embryonic body morphogenesis; voltage-gated ca…	protein_coding
WBGene00020903	acd-5	I:3655552-3662159	N2	rnp-6	OK	3.36602	5.05085	0.585481	2.00993	0.0002	0.00250605	yes	GO:0006810; GO:0005272; GO:0016021; GO:0016020; GO:0006814; GO:0035725; GO:0006811	sodium ion transmembrane transport; ion transport; sodium ion transport; membrane; sodium channel activity; integral component of membrane; transport	protein_coding
WBGene00001501	ftn-2	I:3680177-3680944	N2	rnp-6	OK	256.197	406.953	0.667611	3.49401	5e-05	0.000725861	yes	GO:0005737; GO:0006879; GO:0004322; GO:0006880; GO:0008199; GO:0050830; GO:0006826; GO:0042802; GO:0005515; GO:0005506; GO:0046872; GO:0055114; GO:0016491	ferroxidase activity; cytoplasm; identical protein binding; oxidoreductase activity; cellular iron ion homeostasis; iron ion binding; intracellular sequestering of iron ion; metal ion binding; protein binding; iron ion transport; defense response to Gram-positive bacterium; ferric iron binding; oxidation-reduction process	protein_coding
WBGene00002135	inx-13	I:3748523-3753958	N2	rnp-6	OK	14.7272	10.3142	-0.513843	-1.9911	0.0005	0.00551085	yes	GO:0006810; GO:0016021; GO:0016020; GO:0005886; GO:0006811; GO:0030054; GO:0005921	gap junction; integral component of membrane; ion transport; plasma membrane; membrane; cell junction; transport	protein_coding
WBGene00020191	clec-53	I:3871470-3873416	N2	rnp-6	OK	2.58597	0.926571	-1.48073	-2.76688	5e-05	0.000725861	yes	GO:0004888; GO:0007165; GO:0005887; GO:0030246	integral component of plasma membrane; signal transduction; carbohydrate binding; transmembrane signaling receptor activity	protein_coding
WBGene00001430	fkb-5	I:3898045-3899906	N2	rnp-6	OK	13.7646	8.40308	-0.711977	-2.36438	5e-05	0.000725861	yes	GO:0005737; GO:0000413; GO:0006457; GO:0016853; GO:0005528; GO:0003755; GO:0061077	protein peptidyl-prolyl isomerization; peptidyl-prolyl cis-trans isomerase activity; cytoplasm; protein folding; isomerase activity; chaperone-mediated protein folding; FK506 binding	protein_coding
WBGene00020626	T20F5.4	I:3912636-3915458	N2	rnp-6	OK	2.36077	0.685013	-1.78505	-3.57744	5e-05	0.000725861	yes			protein_coding
WBGene00002696	let-504	I:4129563-4132292	N2	rnp-6	OK	53.6451	73.4043	0.452418	2.28336	0.0001	0.00135972	yes	GO:0007219; GO:0003682; GO:0045892	Notch signaling pathway; chromatin binding; negative regulation of transcription, DNA-templated	protein_coding
WBGene00077701	poml-3	I:4145311-4147136	N2	rnp-6	OK	11.7432	8.07753	-0.539839	-1.88618	0.0013	0.0120757	yes	GO:0016788	hydrolase activity, acting on ester bonds	protein_coding
WBGene00020038	R12E2.13	I:4177304-4178447	N2	rnp-6	OK	147.001	115.103	-0.352895	-1.75096	0.00175	0.015327	yes	GO:0045087; GO:0016020	innate immune response; membrane	protein_coding
WBGene00017004	nrd-1	I:4597889-4602666	N2	rnp-6	OK	38.0564	46.5558	0.290821	1.51296	0.00765	0.048545	yes	GO:0003723; GO:0003676	RNA binding; nucleic acid binding	protein_coding
WBGene00219727	linc-39	I:4683181-4683865	N2	rnp-6	OK	1.41223	0	-inf		5e-05	0.000725861	yes
WBGene00007053	chd-7	I:4685867-4698575	N2	rnp-6	OK	20.6273	26.5908	0.36637	1.88994	0.00145	0.013173	yes	GO:0005634; GO:0004386; GO:0005515; GO:0005524; GO:0016817	helicase activity; protein binding; hydrolase activity, acting on acid anhydrides; nucleus; ATP binding	protein_coding
WBGene00021113	gsp-3	I:4709316-4710708	N2	rnp-6	OK	0.350509	1.12285	1.67964	2.27352	0.00105	0.0101691	yes	GO:0005737; GO:0016787; GO:0042995; GO:0018991; GO:0000003; GO:0031143; GO:0006470; GO:0030317; GO:0030154; GO:0000790; GO:0004721; GO:0007283; GO:0000785; GO:0031272; GO:0046872; GO:0005694; GO:0007060	nuclear chromatin; chromatin; regulation of pseudopodium assembly; pseudopodium; hydrolase activity; cytoplasm; male meiosis chromosome segregation; flagellated sperm motility; cell differentiation; oviposition; phosphoprotein phosphatase activity; metal ion binding; reproduction; protein dephosphorylation; cell projection; spermatogenesis; chromosome	protein_coding
WBGene00019013	tofu-4	I:4821932-4826633	N2	rnp-6	OK	22.6338	29.7322	0.393547	1.7599	0.0024	0.0197654	yes			protein_coding
WBGene00001117	dyf-1	I:4989554-4994661	N2	rnp-6	OK	0.915039	0.47984	-0.93128	-1.80347	0.00245	0.0200889	yes	; GO:0030992; GO:0018095; GO:0060271; GO:0036064; GO:0030030; GO:0005215; GO:0042073; GO:0005879; GO:0005515; GO:0005929; GO:0042995	; transporter activity; cell projection; ciliary basal body; axonemal microtubule; intraciliary transport particle B; protein polyglutamylation; protein binding; cell projection organization; cilium assembly; intraciliary transport; cilium	protein_coding
WBGene00003934	pat-10	I:5018769-5020166	N2	rnp-6	OK	572.774	720.911	0.331853	1.73793	0.0023	0.0191136	yes	GO:0006936; GO:0030240; GO:0031013; GO:0008307; GO:0009792; GO:0005509; GO:0043292	calcium ion binding; structural constituent of muscle; embryo development ending in birth or egg hatching; contractile fiber; skeletal muscle thin filament assembly; muscle contraction; troponin I binding	protein_coding
WBGene00004959	spe-5	I:5100765-5103403	N2	rnp-6	OK	10.1469	7.46307	-0.443197	-1.63784	0.0044	0.0318201	yes	GO:0016820; GO:0015992; GO:0015991; GO:0046034; GO:0033180; GO:0043068; GO:0005524	positive regulation of programmed cell death; proton transport; ATP metabolic process; ATP binding; hydrolase activity, acting on acid anhydrides, catalyzing transmembrane movement of substances; proton-transporting V-type ATPase, V1 domain; ATP hydrolysis coupled proton transport	protein_coding
WBGene00015096	B0261.8	I:5271276-5272037	N2	rnp-6	OK	13.7803	8.12011	-0.763034	-2.23724	0.00015	0.00195025	yes			protein_coding
WBGene00002717	let-526	I:5300994-5317392	N2	rnp-6	OK	30.857	42.615	0.465766	2.41643	5e-05	0.000725861	yes	GO:0006338; GO:0005634; GO:0002119; GO:0045944; GO:0003677; GO:0090544	nematode larval development; chromatin remodeling; DNA binding; BAF-type complex; nucleus; positive regulation of transcription from RNA polymerase II promoter	protein_coding
WBGene00000150	apm-1	I:5342177-5344724	N2	rnp-6	OK	16.7085	10.2471	-0.705364	-2.81935	5e-05	0.000725861	yes	GO:0045176; GO:0016192; GO:0006886; GO:0006810; GO:0030131; GO:0015031; GO:0045087	innate immune response; apical protein localization; vesicle-mediated transport; clathrin adaptor complex; protein transport; intracellular protein transport; transport	protein_coding
WBGene00001067	dpy-5	I:5432157-5433054	N2	rnp-6	OK	0.173243	1.96635	3.50465	3.46237	0.00045	0.00504819	yes	GO:0040002; GO:0040014; GO:0042329; GO:0042338; GO:0040032; GO:0060102; GO:0042302; GO:0005581	collagen and cuticulin-based cuticle development; regulation of multicellular organism growth; cuticle development involved in collagen and cuticulin-based cuticle molting cycle; post-embryonic body morphogenesis; collagen and cuticulin-based cuticle extracellular matrix; structural constituent of collagen and cuticulin-based cuticle; structural constituent of cuticle; collagen trimer	protein_coding
WBGene00016422	noah-1	I:5874432-5878954	N2	rnp-6	OK	32.3108	16.3865	-0.979509	-4.71733	5e-05	0.000725861	yes	GO:0042335; GO:0016021; GO:0016020; GO:0018996; GO:0002064	epithelial cell development; molting cycle, collagen and cuticulin-based cuticle; integral component of membrane; cuticle development; membrane	protein_coding
WBGene00044414	C06A5.12	I:6004652-6007595	N2	rnp-6	OK	6.56417	2.95491	-1.1515	-1.84718	0.0039	0.0289822	yes	GO:0016021; GO:0016020	integral component of membrane; membrane	protein_coding
WBGene00022751	ZK484.5	I:6087368-6087764	N2	rnp-6	OK	4.16027	8.77456	1.07665	2.02393	0.00095	0.00937283	yes			protein_coding
WBGene00022752	ZK484.6	I:6090074-6090895	N2	rnp-6	OK	1.06547	2.17022	1.02636	1.65066	0.0058	0.0393398	yes	GO:0003824; GO:0008152	metabolic process; catalytic activity	protein_coding
WBGene00022754	nspd-1	I:6097495-6097837	N2	rnp-6	OK	2.83275	6.05706	1.09642	1.66934	0.00525	0.0364418	yes			protein_coding
WBGene00020382	T09B4.8	I:6164714-6166539	N2	rnp-6	OK	26.6563	15.8446	-0.750489	-3.20511	5e-05	0.000725861	yes	GO:0008453; GO:0008483; GO:0005739; GO:0003824; GO:0030170; GO:0042802	pyridoxal phosphate binding; catalytic activity; identical protein binding; transaminase activity; mitochondrion; alanine-glyoxylate transaminase activity	protein_coding
WBGene00017065	D2092.4	I:6612186-6615978	N2	rnp-6	OK	6.75818	10.4419	0.627684	2.2632	0.0001	0.00135972	yes	GO:0030016; GO:0016021; GO:0016020; GO:0045454	cell redox homeostasis; myofibril; integral component of membrane; membrane	protein_coding
WBGene00006819	unc-87	I:6760431-6767797	N2	rnp-6	OK	142.569	179.605	0.333166	1.73046	0.00225	0.0187814	yes	; GO:0001725; GO:0031034; GO:0031032; GO:0051017; GO:0031674; GO:0017022; GO:1904111; GO:0051015; GO:0005515; GO:0005865; GO:0042642; GO:0042643; GO:1904113	actin filament binding; ; actomyosin, actin portion; stress fiber; myosin filament assembly; protein binding; negative regulation of plus-end directed microfilament motor activity; myosin binding; striated muscle thin filament; I band; actomyosin, myosin complex part; negative regulation of muscle filament sliding; actomyosin structure organization; actin filament bundle assembly	protein_coding
WBGene00016492	C37A2.6	I:6788082-6788986	N2	rnp-6	OK	6.1708	3.76027	-0.714623	-1.76926	0.0033	0.025334	yes	GO:0008168; GO:0016740; GO:0032259	transferase activity; methyltransferase activity; methylation	protein_coding
WBGene00020401	T10B11.5	I:6940219-6941990	N2	rnp-6	OK	4.79189	2.41296	-0.989791	-2.39077	0.00025	0.00303907	yes			protein_coding
WBGene00016261	C30F12.2	I:6967667-6970190	N2	rnp-6	OK	21.2396	16.1434	-0.395817	-1.70463	0.00285	0.0225677	yes	GO:0005524	ATP binding	protein_coding
WBGene00044988	W01A8.2,W01A8.8	I:7053687-7056875	N2	rnp-6	OK	51.9339	37.7685	-0.459492	-1.88143	0.00075	0.00772691	yes	GO:0005179; GO:0005576	extracellular region; hormone activity	protein_coding
WBGene00012164	W01A8.2,W01A8.8	I:7053687-7056875	N2	rnp-6	OK	51.9339	37.7685	-0.459492	-1.88143	0.00075	0.00772691	yes			protein_coding
WBGene00043279	F22D6.8	I:7098976-7099705	N2	rnp-6	OK	40.6979	26.4525	-0.621554	-2.05494	0.00035	0.00407043	yes			protein_coding
WBGene00010738	K10D3.4	I:7134742-7139973	N2	rnp-6	OK	6.35589	3.67855	-0.788959	-2.80128	5e-05	0.000725861	yes	GO:0010951; GO:0004867	serine-type endopeptidase inhibitor activity; negative regulation of endopeptidase activity	protein_coding
WBGene00002348	myo-1	I:7258920-7267079	N2	rnp-6	OK	17.4651	32.7403	0.906591	4.70271	5e-05	0.000725861	yes	GO:0005737; GO:0030016; GO:0032982; GO:0006936; GO:0043050; GO:0000166; GO:0003779; GO:0008307; GO:0016459; GO:0048017; GO:0005863; GO:0003774; GO:0005524	actin binding; motor activity; cytoplasm; striated muscle myosin thick filament; structural constituent of muscle; muscle contraction; pharyngeal pumping; inositol lipid-mediated signaling; ATP binding; myosin complex; myosin filament; nucleotide binding; myofibril	protein_coding
WBGene00008763	F13G3.3	I:7295752-7299977	N2	rnp-6	OK	0.749826	0.214985	-1.80232	-1.69219	0.00675	0.0441976	yes	; GO:0016021; GO:0016020; GO:0016740; GO:0016757	transferase activity, transferring glycosyl groups; transferase activity; integral component of membrane; ; membrane	protein_coding
WBGene00006754	unc-15	I:7376603-7383197	N2	rnp-6	OK	93.4367	138.754	0.570469	3.0342	5e-05	0.000725861	yes	GO:0005737; GO:0040011; GO:0032982; ; GO:0008092; GO:0030241; GO:0031672; GO:0051493; GO:0017124; GO:0060279; GO:0019901; GO:0016459; GO:0003774; GO:0060298	; positive regulation of sarcomere organization; skeletal muscle myosin thick filament assembly; protein kinase binding; myosin complex; motor activity; cytoplasm; SH3 domain binding; positive regulation of ovulation; A band; cytoskeletal protein binding; locomotion; myosin filament; regulation of cytoskeleton organization	protein_coding
WBGene00012139	T28F4.4	I:7486576-7490174	N2	rnp-6	OK	18.5993	8.41333	-1.1445	-4.88546	5e-05	0.000725861	yes	; GO:0005488	; binding	protein_coding
WBGene00012151	VH15N14R.1	I:7779418-7785798	N2	rnp-6	OK	3.63466	6.27203	0.787113	1.79058	0.00205	0.0174119	yes			protein_coding
WBGene00009271	glna-3	I:7826440-7831629	N2	rnp-6	OK	2.13489	3.09665	0.536545	1.56387	0.00765	0.048545	yes	GO:0016787; GO:0004359; GO:0006541; GO:0006543; GO:0006537; GO:0005515; GO:0005759	glutaminase activity; hydrolase activity; protein binding; glutamate biosynthetic process; mitochondrial matrix; glutamine metabolic process; glutamine catabolic process	protein_coding
WBGene00000639	col-63	I:8243692-8244961	N2	rnp-6	OK	0.168364	0.740506	2.13693	2.37189	0.0023	0.0191136	yes	GO:0016021; GO:0016020; GO:0005581; GO:0042302	structural constituent of cuticle; collagen trimer; integral component of membrane; membrane	protein_coding
WBGene00011344	T01G9.2	I:8270394-8288124	N2	rnp-6	OK	49.135	39.2684	-0.323383	-1.54983	0.00775	0.0489842	yes	GO:0005737; ; GO:0055120; GO:0005515	; cytoplasm; striated muscle dense body; protein binding	protein_coding
WBGene00001960	hlh-16	I:8767018-8768028	N2	rnp-6	OK	3.71162	1.53423	-1.27453	-1.96539	0.00275	0.0219448	yes	GO:0046983	protein dimerization activity	protein_coding
WBGene00009460	ubr-5	I:8828043-8838719	N2	rnp-6	OK	83.6071	102.294	0.29102	1.5526	0.00695	0.0452297	yes	GO:0005737; GO:0061630; GO:0006974; GO:0016567; GO:0016740; GO:0043130; GO:0004842; GO:0008270; GO:0016874; GO:0005488	ubiquitin protein ligase activity; cellular response to DNA damage stimulus; transferase activity; binding; zinc ion binding; ubiquitin binding; ubiquitin-protein transferase activity; ligase activity; cytoplasm; protein ubiquitination	protein_coding
WBGene00010422	H32K16.2	I:9154188-9154730	N2	rnp-6	OK	12.468	6.90064	-0.853425	-1.98847	0.00095	0.00937283	yes			protein_coding
WBGene00008779	F14B4.1	I:9265950-9270919	N2	rnp-6	OK	4.4993	2.5559	-0.815868	-2.63497	5e-05	0.000725861	yes	GO:0016021; GO:0016020; GO:0005509; GO:0005515	calcium ion binding; protein binding; integral component of membrane; membrane	protein_coding
WBGene00002026	hsp-70	I:9317735-9327212	N2	rnp-6	OK	3.86722	1.94541	-0.991227	-2.7677	5e-05	0.000725861	yes	GO:0030968; GO:0005832; GO:0000166; GO:0009408; GO:0008340; GO:0005524	chaperonin-containing T-complex; endoplasmic reticulum unfolded protein response; response to heat; ATP binding; nucleotide binding; determination of adult lifespan	protein_coding
WBGene00044680	F30A10.13	I:9478466-9479091	N2	rnp-6	OK	14.5687	7.40325	-0.97664	-2.05969	0.0008	0.00816818	yes			protein_coding
WBGene00010488	K02A11.3	I:9744241-9747954	N2	rnp-6	OK	20.2443	14.8088	-0.451056	-1.72235	0.0024	0.0197654	yes	GO:0090502; GO:0016787; GO:0004518; GO:0004519; GO:0004521; GO:0016788; GO:0090305; GO:0005576; GO:0003723; GO:0046872	extracellular region; RNA binding; RNA phosphodiester bond hydrolysis, endonucleolytic; endonuclease activity; endoribonuclease activity; nucleic acid phosphodiester bond hydrolysis; hydrolase activity; metal ion binding; nuclease activity; hydrolase activity, acting on ester bonds	protein_coding
WBGene00009160	F26E4.4,F26E4.5	I:9768883-9772565	N2	rnp-6	OK	47.6375	65.9735	0.469788	2.28737	0.0002	0.00250605	yes	GO:0042127; GO:0006468; GO:0030154; GO:0038083; GO:0016310; GO:0045087; GO:0016301; GO:0000166; GO:0016740; GO:0004715; GO:0004713; GO:0004672; GO:0007169; GO:0005102; GO:0016477; GO:0031234; GO:0005524	innate immune response; peptidyl-tyrosine autophosphorylation; cell migration; protein phosphorylation; transferase activity; extrinsic component of cytoplasmic side of plasma membrane; non-membrane spanning protein tyrosine kinase activity; phosphorylation; cell differentiation; protein kinase activity; kinase activity; protein tyrosine kinase activity; receptor binding; ATP binding; regulation …	protein_coding
WBGene00009159	F26E4.4,F26E4.5	I:9768883-9772565	N2	rnp-6	OK	47.6375	65.9735	0.469788	2.28737	0.0002	0.00250605	yes	GO:0003899; GO:0005666; GO:0006383; GO:0003677	DNA-directed RNA polymerase III complex; DNA-directed 5'-3' RNA polymerase activity; DNA binding; transcription from RNA polymerase III promoter	protein_coding
WBGene00003842	oct-1	I:9888356-9892223	N2	rnp-6	OK	1.55279	0.886538	-0.808605	-1.81281	0.002	0.017068	yes	; GO:0006810; GO:0008514; GO:0016021; GO:0016020; GO:0015711; GO:0055085; GO:0022857; GO:0015695; GO:0005887; GO:0008340; GO:0015101; GO:0006811	; integral component of plasma membrane; organic anion transport; organic anion transmembrane transporter activity; integral component of membrane; ion transport; transmembrane transporter activity; determination of adult lifespan; organic cation transmembrane transporter activity; membrane; organic cation transport; transmembrane transport; transport	protein_coding
WBGene00013694	Y106G6A.1	I:9936124-9938300	N2	rnp-6	OK	34.8276	24.4003	-0.513331	-2.35692	5e-05	0.000725861	yes	GO:0006468; GO:0016529; GO:0005524; GO:0004672	protein kinase activity; sarcoplasmic reticulum; ATP binding; protein phosphorylation	protein_coding
WBGene00011906	hsp-12.1	I:10581587-10582611	N2	rnp-6	OK	5.43672	2.24681	-1.27485	-2.1589	0.0008	0.00816818	yes	GO:0005737; GO:0055120	cytoplasm; striated muscle dense body	protein_coding
WBGene00015236	B0511.11	I:10648600-10654179	N2	rnp-6	OK	12.1775	5.41933	-1.16803	-4.09418	5e-05	0.000725861	yes			protein_coding
WBGene00021387	Y37F4.6	I:10869944-10875046	N2	rnp-6	OK	2.33571	3.34991	0.520262	1.52332	0.0079	0.0496976	yes	GO:0003700; GO:0006355; GO:0005634; GO:0003676; GO:0003677	nucleic acid binding; DNA binding; nucleus; DNA binding transcription factor activity; regulation of transcription, DNA-templated	protein_coding
WBGene00000780	cpn-4	I:10924237-10925753	N2	rnp-6	OK	46.8136	76.4384	0.70737	2.99375	5e-05	0.000725861	yes	GO:0005515	protein binding	protein_coding
WBGene00013181	Y53H1B.2	I:11292660-11294182	N2	rnp-6	OK	87.2971	109.763	0.330392	1.5845	0.0057	0.0388114	yes			protein_coding
WBGene00013180	cutl-10	I:11294635-11297193	N2	rnp-6	OK	0.997493	0.384884	-1.37388	-2.053	0.00215	0.018108	yes	GO:0016021; GO:0016020	integral component of membrane; membrane	protein_coding
WBGene00173414	vab-10	I:11744171-11792118	N2	rnp-6	OK	37.3998	50.3371	0.428593	1.87048	0.0007	0.00728567	yes
WBGene00006876	vab-10	I:11744171-11792118	N2	rnp-6	OK	37.3998	50.3371	0.428593	1.87048	0.0007	0.00728567	yes	GO:0005856; GO:0016337; GO:0016324; GO:0008017; GO:0051015; GO:0003779; GO:0043229; GO:0005882; GO:0005515; GO:0009925; GO:0048730; GO:0030056	actin filament binding; epidermis morphogenesis; basal plasma membrane; actin binding; protein binding; apical plasma membrane; hemidesmosome; intracellular organelle; single organismal cell-cell adhesion; cytoskeleton; intermediate filament; microtubule binding	protein_coding
WBGene00011385	T02G6.2	I:11800432-11804991	N2	rnp-6	OK	0.73891	1.64428	1.15399	1.76663	0.0024	0.0197654	yes			protein_coding
WBGene00012947	Y47H9C.1	I:11830984-11833166	N2	rnp-6	OK	13.1322	18.232	0.473361	1.83386	0.0012	0.0113201	yes	GO:0045087; GO:0045121	innate immune response; membrane raft	protein_coding
WBGene00013134	hsf-2	I:11968021-11969847	N2	rnp-6	OK	1.14995	2.12637	0.886829	1.96389	0.0012	0.0113201	yes
WBGene00010242	F58D5.2	I:12065946-12068660	N2	rnp-6	OK	17.1481	10.3904	-0.722797	-1.6711	0.0045	0.0323767	yes	GO:0016021; GO:0016020	integral component of membrane; membrane	protein_coding
WBGene00012961	Y47H10A.5	I:12095734-12097939	N2	rnp-6	OK	42.5179	57.544	0.436596	2.0018	0.00095	0.00937283	yes			protein_coding
WBGene00004509	rrf-2	I:12098667-12105977	N2	rnp-6	OK	2.76166	3.76108	0.445614	1.72264	0.0028	0.0222533	yes	GO:0003968; GO:0001172	RNA-directed 5'-3' RNA polymerase activity; transcription, RNA-templated	protein_coding
WBGene00010822	M01G12.9	I:12109060-12112513	N2	rnp-6	OK	6.61367	4.48061	-0.561756	-1.95718	0.00085	0.00858204	yes			protein_coding
WBGene00014336	F15H9.6	I:12148079-12150741	N2	rnp-6	OK	664.315	132.534	-2.32551	-6.76378	5e-05	0.000725861	yes
WBGene00008476	E03H4.8	I:12424554-12426766	N2	rnp-6	OK	7.16627	5.17332	-0.470132	-1.56508	0.0063	0.0419085	yes	GO:0006886; GO:0030117; GO:0016192; GO:0005515; GO:0005198	membrane coat; intracellular protein transport; vesicle-mediated transport; structural molecule activity; protein binding	protein_coding
WBGene00008477	clec-17	I:12430028-12431474	N2	rnp-6	OK	0.196547	0.906851	2.20599	2.63664	0.0003	0.00356315	yes	GO:0030246	carbohydrate binding	protein_coding
WBGene00009361	F33E2.5	I:12591119-12598916	N2	rnp-6	OK	30.3568	16.8552	-0.848828	-3.2372	5e-05	0.000725861	yes			protein_coding
WBGene00045509	F33E2.5	I:12591119-12598916	N2	rnp-6	OK	30.3568	16.8552	-0.848828	-3.2372	5e-05	0.000725861	yes
WBGene00012474	attf-6	I:12787942-12806581	N2	rnp-6	OK	24.9666	35.7819	0.519229	2.70867	5e-05	0.000725861	yes	GO:0006355	regulation of transcription, DNA-templated	protein_coding
WBGene00012476	Y18D10A.3	I:12810168-12815641	N2	rnp-6	OK	4.95432	3.25578	-0.605681	-1.62776	0.0062	0.0413837	yes			protein_coding
WBGene00007660	C17H1.7	I:13136466-13138521	N2	rnp-6	OK	0.10662	0.847116	2.99008	2.89195	0.00125	0.0117015	yes			protein_coding
WBGene00009697	F44F1.5	I:13258380-13260217	N2	rnp-6	OK	3.76586	2.60675	-0.530729	-1.58146	0.0066	0.0434415	yes
WBGene00009698	F44F1.6	I:13260932-13262727	N2	rnp-6	OK	7.08082	4.37432	-0.694858	-1.66007	0.00715	0.0462067	yes	GO:0005737;	; cytoplasm	protein_coding
WBGene00011431	T04D3.1	I:13302755-13304304	N2	rnp-6	OK	14.7314	19.1794	0.380668	1.59145	0.0064	0.0424098	yes	GO:0005737	cytoplasm	protein_coding
WBGene00044066	fbxb-66	I:13423993-13425144	N2	rnp-6	OK	13.5293	8.34282	-0.697482	-2.4249	0.00015	0.00195025	yes	GO:0005515	protein binding	protein_coding
WBGene00012365	W09G3.1	I:13828102-13832146	N2	rnp-6	OK	24.4784	15.4194	-0.66676	-2.38319	5e-05	0.000725861	yes	; GO:0005515	; protein binding	protein_coding
WBGene00012239	W04A8.4	I:13841894-13843258	N2	rnp-6	OK	47.8609	24.2053	-0.983527	-4.01948	5e-05	0.000725861	yes	GO:0006139; GO:0008408; GO:0005783; GO:0003676; GO:0090305	nucleobase-containing compound metabolic process; nucleic acid binding; endoplasmic reticulum; 3'-5' exonuclease activity; nucleic acid phosphodiester bond hydrolysis	protein_coding
WBGene00077443	Y71A12B.19	I:13972616-13973412	N2	rnp-6	OK	7.40812	3.50294	-1.08054	-2.64263	5e-05	0.000725861	yes
WBGene00007988	best-8	I:14158509-14161718	N2	rnp-6	OK	0.977015	1.78081	0.866078	1.87824	0.00165	0.0145952	yes	GO:0006810; GO:1902476; GO:0016021; GO:0016020; GO:0034707; GO:0006821; GO:0005886; GO:0005254; GO:0006811	chloride channel complex; chloride transmembrane transport; chloride transport; chloride channel activity; ion transport; plasma membrane; membrane; integral component of membrane; transport	protein_coding
WBGene00008611	fbxb-68	I:14285936-14287077	N2	rnp-6	OK	1.45408	0.75721	-0.941341	-1.62402	0.00785	0.0494531	yes			protein_coding
WBGene00002978	lev-11	I:14620758-14631254	N2	rnp-6	OK	184.292	240.273	0.382679	1.95705	0.00075	0.00772691	yes	GO:0005737; GO:0040011; GO:0030833; GO:0030835; GO:0034609; GO:0007015; GO:0006936; GO:0051015; GO:0003779; GO:0009790; GO:0008307; GO:0043393; GO:0005884; GO:0005865; GO:0005862;	actin filament binding; regulation of protein binding; actin filament; actin filament organization; ; actin binding; cytoplasm; structural constituent of muscle; spicule insertion; striated muscle thin filament; embryo development; negative regulation of actin filament depolymerization; locomotion; muscle contraction; regulation of actin filament polymerization; muscle thin filament tropomyosin	protein_coding
WBGene00013693	Y105E8B.9	I:14675600-14682563	N2	rnp-6	OK	5.96717	4.3223	-0.465247	-1.605	0.0046	0.032894	yes	GO:0005764; GO:0005975; GO:0004553	lysosome; carbohydrate metabolic process; hydrolase activity, hydrolyzing O-glycosyl compounds	protein_coding
WBGene00010585	K05C4.9	I:14726877-14730719	N2	rnp-6	OK	6.36755	3.34529	-0.928607	-3.17245	5e-05	0.000725861	yes	GO:0016567; GO:0031462; GO:0004842; GO:0051438; GO:0005515	protein ubiquitination; protein binding; Cul2-RING ubiquitin ligase complex; ubiquitin-protein transferase activity; regulation of ubiquitin-protein transferase activity	protein_coding
WBGene00009304	eva-1	I:14829666-14834839	N2	rnp-6	OK	2.34289	1.117	-1.06866	-2.38195	0.0001	0.00135972	yes	; GO:0031430; GO:0016021; GO:0016020; GO:0030246; GO:0055120; GO:0005515; GO:0030054	; carbohydrate binding; M band; protein binding; striated muscle dense body; integral component of membrane; membrane; cell junction	protein_coding
WBGene00006789	unc-54	I:14855898-14863540	N2	rnp-6	OK	91.8404	145.017	0.659025	3.52198	5e-05	0.000725861	yes	GO:0005737; GO:0040011; GO:0018991; GO:0000146; GO:0006936; GO:0043050; GO:0030241; GO:0031672; GO:0051015; GO:0000166; GO:0003779; GO:0008307; GO:0016459; GO:0048017; GO:0005515; GO:0032982; GO:0030016; GO:0005859; GO:0005863; GO:0003774; GO:0005524	actin filament binding; myosin complex; muscle myosin complex; microfilament motor activity; skeletal muscle myosin thick filament assembly; actin binding; motor activity; cytoplasm; striated muscle myosin thick filament; structural constituent of muscle; muscle contraction; A band; oviposition; pharyngeal pumping; inositol lipid-mediated signaling; ATP binding; protein binding; locomotion; myosi…	protein_coding
WBGene00009369	F33H2.6	I:15014850-15016595	N2	rnp-6	OK	84.2484	52.0044	-0.696016	-3.31424	5e-05	0.000725861	yes	GO:0005515	protein binding	protein_coding
WBGene00009371	F33H2.8	I:15031144-15033039	N2	rnp-6	OK	2.69145	1.3422	-1.00378	-1.98116	0.0016	0.014229	yes	GO:0016021; GO:0016020	integral component of membrane; membrane	protein_coding
WBGene00016809	C50D2.6	II:84433-87799	N2	rnp-6	OK	2.21513	7.85577	1.82636	4.4918	5e-05	0.000725861	yes			protein_coding
WBGene00019278	K01A2.3	II:314124-315786	N2	rnp-6	OK	3.21914	1.76064	-0.870571	-1.92484	0.0013	0.0120757	yes
WBGene00001391	far-7	II:319792-321107	N2	rnp-6	OK	58.8788	37.0504	-0.668261	-2.50926	5e-05	0.000725861	yes	GO:0005737; GO:0070538; GO:0008289;	oleic acid binding; cytoplasm; lipid binding;	protein_coding
WBGene00016071	C24H12.1	II:441497-443674	N2	rnp-6	OK	5.51433	3.24032	-0.767052	-2.13491	0.00045	0.00504819	yes	GO:0016021; GO:0016020; GO:0005515	protein binding; integral component of membrane; membrane	protein_coding
WBGene00021076	W07E6.5	II:476256-478064	N2	rnp-6	OK	15.8459	10.0749	-0.653341	-2.17129	0.0002	0.00250605	yes	GO:0016021; GO:0016020	integral component of membrane; membrane	protein_coding
WBGene00004188	prp-21	II:484865-490404	N2	rnp-6	OK	48.5582	60.8832	0.326329	1.66687	0.00345	0.0262347	yes	GO:0000381; GO:0071013; GO:0000389; GO:0071004; GO:0003723; GO:0005515; GO:0005686; GO:0006396	catalytic step 2 spliceosome; RNA processing; RNA binding; U2 snRNP; regulation of alternative mRNA splicing, via spliceosome; U2-type prespliceosome; protein binding; mRNA 3'-splice site recognition	protein_coding
WBGene00020836	lgc-34	II:526591-530364	N2	rnp-6	OK	1.62797	2.59919	0.674987	1.65629	0.0047	0.0334361	yes	GO:0006810; GO:1902476; GO:0005230; GO:0016020; GO:0005216; GO:0034220; GO:0006821; GO:0005886; GO:0006811; GO:0005254; GO:0016021	ion transport; ion transmembrane transport; chloride transmembrane transport; chloride transport; chloride channel activity; ion channel activity; extracellular ligand-gated ion channel activity; transport; membrane; integral component of membrane; plasma membrane	protein_coding
WBGene00021093	W08F4.3	II:580601-582015	N2	rnp-6	OK	155.253	191.426	0.302164	1.56403	0.00575	0.0390509	yes	GO:0005783	endoplasmic reticulum	protein_coding
WBGene00000106	alg-2	II:873175-878954	N2	rnp-6	OK	23.5851	30.708	0.380739	1.8805	0.00115	0.01096	yes	GO:0005737; GO:0090502; GO:0035198; GO:0003676; GO:0035068; GO:0035196; GO:0002119; GO:0070551; GO:0016892; GO:0003727; GO:0009792; GO:0031047; GO:0005515; GO:0035279; GO:0003725; GO:0070922	nucleic acid binding; nematode larval development; embryo development ending in birth or egg hatching; cytoplasm; double-stranded RNA binding; RNA phosphodiester bond hydrolysis, endonucleolytic; micro-ribonucleoprotein complex; small RNA loading onto RISC; production of miRNAs involved in gene silencing by miRNA; miRNA binding; single-stranded RNA binding; gene silencing by RNA; protein binding;…	protein_coding
WBGene00019923	fbxc-29	II:916050-917470	N2	rnp-6	OK	4.95602	3.28302	-0.59416	-1.71746	0.00395	0.0292687	yes			protein_coding
WBGene00019921	fbxc-34	II:931183-932327	N2	rnp-6	OK	5.93969	2.73614	-1.11825	-2.84683	5e-05	0.000725861	yes			protein_coding
WBGene00004076	pod-2	II:1136800-1152705	N2	rnp-6	OK	49.8712	85.4195	0.776359	3.93776	5e-05	0.000725861	yes	GO:0006633; GO:0000166; GO:0002119; GO:0045197; GO:0005789; GO:0003824; GO:0003989; GO:0030104; GO:0009949; GO:0004075; GO:0046872; GO:0016874; GO:0005524	endoplasmic reticulum membrane; establishment or maintenance of epithelial cell apical/basal polarity; nematode larval development; water homeostasis; polarity specification of anterior/posterior axis; catalytic activity; fatty acid biosynthetic process; ligase activity; ATP binding; biotin carboxylase activity; acetyl-CoA carboxylase activity; nucleotide binding; metal ion binding	protein_coding
WBGene00021779	Y51H7C.1	II:1467726-1469674	N2	rnp-6	OK	0.969988	1.89224	0.964059	2.07795	0.0004	0.00457121	yes			protein_coding
WBGene00044697	poml-4	II:1540927-1542718	N2	rnp-6	OK	0.920995	1.65796	0.84814	1.63223	0.0056	0.0382788	yes	GO:0004064; GO:0016788	arylesterase activity; hydrolase activity, acting on ester bonds	protein_coding
WBGene00006464	bath-47	II:1601788-1604618	N2	rnp-6	OK	3.08862	4.64265	0.587986	1.96299	0.0008	0.00816818	yes	GO:0005515	protein binding	protein_coding
WBGene00018108	F36H5.10	II:1756819-1757761	N2	rnp-6	OK	1.11846	0.246403	-2.18242	-1.11259	0.00725	0.0466777	yes	GO:0016021; GO:0016020	integral component of membrane; membrane	protein_coding
WBGene00018103	F36H5.4	II:1761838-1762906	N2	rnp-6	OK	3.18927	1.42517	-1.1621	-2.49445	0.00015	0.00195025	yes	GO:0016021; GO:0016020	integral component of membrane; membrane	protein_coding
WBGene00018100	math-26	II:1771646-1774955	N2	rnp-6	OK	2.94119	2.01418	-0.546205	-1.68629	0.0034	0.0259387	yes	GO:0005515	protein binding	protein_coding
WBGene00219271	F36H5.14,math-3	II:1775546-1778526	N2	rnp-6	OK	9.63459	5.07241	-0.925552	-2.57894	5e-05	0.000725861	yes	GO:0005515	protein binding	protein_coding
WBGene00015608	F36H5.14,math-3	II:1775546-1778526	N2	rnp-6	OK	9.63459	5.07241	-0.925552	-2.57894	5e-05	0.000725861	yes	; GO:0005515	; protein binding	protein_coding
WBGene00020360	math-41	II:1824628-1830195	N2	rnp-6	OK	2.54374	4.74863	0.900558	2.96978	5e-05	0.000725861	yes	GO:0005515	protein binding	protein_coding
WBGene00020357	T08E11.1	II:1836503-1840292	N2	rnp-6	OK	0.107716	0.414065	1.94262	2.24569	0.00185	0.016033	yes	GO:0005515	protein binding	protein_coding
WBGene00016883	C52E2.4	II:1843188-1846234	N2	rnp-6	OK	2.47245	1.58881	-0.637997	-1.784	0.0022	0.0184426	yes			protein_coding
WBGene00017208	fbxb-35	II:2050022-2052745	N2	rnp-6	OK	3.98754	2.23765	-0.833514	-2.00559	0.00125	0.0117015	yes	GO:0005515	protein binding	protein_coding
WBGene00020075	math-35	II:2104523-2106866	N2	rnp-6	OK	3.93232	1.5108	-1.38006	-3.16766	5e-05	0.000725861	yes
WBGene00016547	C40A11.4	II:2137460-2138990	N2	rnp-6	OK	6.56442	3.38685	-0.954724	-2.31172	0.00015	0.00195025	yes	GO:0051260; GO:0005515	protein binding; protein homooligomerization	protein_coding
WBGene00016546	C40A11.3	II:2141117-2142957	N2	rnp-6	OK	3.2566	1.78193	-0.869924	-1.78308	0.00475	0.0337236	yes	GO:0051260; GO:0005515	protein binding; protein homooligomerization	protein_coding
WBGene00016545	C40A11.2	II:2146949-2148775	N2	rnp-6	OK	7.23319	3.15208	-1.19833	-2.88348	5e-05	0.000725861	yes	GO:0051260; GO:0005515	protein binding; protein homooligomerization	protein_coding
WBGene00016335	gba-1	II:2176891-2181975	N2	rnp-6	OK	44.555	22.9762	-0.955445	-4.50285	5e-05	0.000725861	yes	GO:0016787; GO:0004348; GO:0005764; GO:0006680; GO:0006665; GO:0006629	glucosylceramide catabolic process; lysosome; hydrolase activity; glucosylceramidase activity; lipid metabolic process; sphingolipid metabolic process	protein_coding
WBGene00018766	F53G2.1	II:2488753-2496641	N2	rnp-6	OK	1.41041	0.764143	-0.884204	-2.00747	0.00135	0.0124346	yes			protein_coding
WBGene00017056	D2062.4	II:2623922-2624530	N2	rnp-6	OK	0	0.518602	inf		0.0002	0.00250605	yes	GO:0016021; GO:0016020	integral component of membrane; membrane	protein_coding
WBGene00017712	F22E5.17	II:2678058-2679162	N2	rnp-6	OK	24.8061	34.446	0.473644	1.99518	0.0005	0.00551085	yes			protein_coding
WBGene00017249	fbxb-108	II:2764963-2767230	N2	rnp-6	OK	2.32423	1.32061	-0.815552	-1.93297	0.00145	0.013173	yes	GO:0005515	protein binding	protein_coding
WBGene00022441	Y110A2AL.4	II:2839303-2840386	N2	rnp-6	OK	11.4819	4.51964	-1.34508	-3.64485	5e-05	0.000725861	yes			protein_coding
WBGene00016573	C41H7.3	II:3005845-3007507	N2	rnp-6	OK	21.5838	27.7309	0.361546	1.55114	0.0076	0.0482968	yes	GO:0005634	nucleus	protein_coding
WBGene00021289	Y25C1A.2	II:3112612-3113337	N2	rnp-6	OK	0.518069	2.39177	2.20686	2.63597	0.00055	0.00597832	yes			protein_coding
WBGene00195073	F02E11.7	II:3267662-3271502	N2	rnp-6	OK	4.31759	1.13694	-1.92507	-2.0885	0.0007	0.00728567	yes	GO:0016021; GO:0016020	integral component of membrane; membrane	protein_coding
WBGene00021726	bath-10	II:3375142-3376714	N2	rnp-6	OK	9.08384	5.52979	-0.716078	-2.21221	0.00035	0.00407043	yes	GO:0005515	protein binding	protein_coding
WBGene00021725	Y49F6C.2,bath-9	II:3377110-3379551	N2	rnp-6	OK	12.324	7.0326	-0.809344	-2.61687	5e-05	0.000725861	yes	GO:0005515	protein binding	protein_coding
WBGene00021724	Y49F6C.2,bath-9	II:3377110-3379551	N2	rnp-6	OK	12.324	7.0326	-0.809344	-2.61687	5e-05	0.000725861	yes			protein_coding
WBGene00194713	F19B10.13	II:3662257-3662986	N2	rnp-6	OK	2.82692	9.93965	1.81397	4.58411	5e-05	0.000725861	yes			protein_coding
WBGene00017583	F19B10.1	II:3683176-3684996	N2	rnp-6	OK	8.91172	11.8618	0.412543	1.53812	0.0076	0.0482968	yes			protein_coding
WBGene00020774	T24E12.5	II:3753920-3757356	N2	rnp-6	OK	0.485925	1.16852	1.26588	2.55935	5e-05	0.000725861	yes	GO:0016021; GO:0016020	integral component of membrane; membrane	protein_coding
WBGene00018803	fbxa-24	II:3816960-3818238	N2	rnp-6	OK	13.4021	4.24535	-1.65851	-5.30697	5e-05	0.000725861	yes			protein_coding
WBGene00018748	F53C3.4	II:3901407-3902741	N2	rnp-6	OK	1.90852	0.569834	-1.74384	-2.65546	0.0002	0.00250605	yes	GO:0016021; GO:0016020	integral component of membrane; membrane	protein_coding
WBGene00020007	R11F4.1	II:4091836-4094348	N2	rnp-6	OK	34.8999	48.3321	0.469758	2.30244	0.00015	0.00195025	yes	GO:0004370; GO:0019563; GO:0005975; GO:0006641; GO:0016773; GO:0016310; GO:0016301; GO:0005739; GO:0000166; GO:0046167; GO:0016740; GO:0006071; GO:0006072; GO:0005524	triglyceride metabolic process; glycerol metabolic process; glycerol-3-phosphate metabolic process; transferase activity; carbohydrate metabolic process; phosphorylation; kinase activity; glycerol catabolic process; ATP binding; phosphotransferase activity, alcohol group as acceptor; mitochondrion; glycerol-3-phosphate biosynthetic process; nucleotide binding; glycerol kinase activity	protein_coding
WBGene00019855	R03H10.2	II:4155771-4167367	N2	rnp-6	OK	2.92796	1.52466	-0.941409	-2.26737	0.0003	0.00356315	yes	GO:0016021; GO:0016020	integral component of membrane; membrane	protein_coding
WBGene00006495	cpna-1	II:4186665-4208499	N2	rnp-6	OK	9.33137	13.516	0.534506	2.11918	0.0002	0.00250605	yes	; GO:0005737; GO:0030674; GO:0031430; GO:0060298; GO:0016021; GO:0016020; GO:0009925; GO:0055120; GO:0005515; GO:0005886; GO:0019902	; positive regulation of sarcomere organization; phosphatase binding; M band; basal plasma membrane; cytoplasm; membrane; striated muscle dense body; protein binding; protein binding, bridging; integral component of membrane; plasma membrane	protein_coding
WBGene00015298	C01F1.3	II:4295100-4299211	N2	rnp-6	OK	9.60493	5.28077	-0.863028	-2.72424	5e-05	0.000725861	yes	GO:0009225; GO:0008460;	; nucleotide-sugar metabolic process; dTDP-glucose 4,6-dehydratase activity	protein_coding
WBGene00015115	B0286.1	II:4378655-4386353	N2	rnp-6	OK	4.45549	2.53359	-0.814402	-1.83152	0.00245	0.0200889	yes			protein_coding
WBGene00019489	K07E1.1	II:4550893-4552175	N2	rnp-6	OK	4.85354	7.41755	0.611906	1.79187	0.0022	0.0184426	yes	GO:0005737; GO:0008652; GO:0019509; GO:0010309; GO:0051213; GO:0005634; GO:0006555; GO:0009086; GO:0055114; GO:0016491	L-methionine salvage from methylthioadenosine; acireductone dioxygenase [iron(II)-requiring] activity; cytoplasm; oxidoreductase activity; methionine biosynthetic process; methionine metabolic process; nucleus; dioxygenase activity; cellular amino acid biosynthetic process; oxidation-reduction process	protein_coding
WBGene00077490	M03A1.8	II:4560396-4562621	N2	rnp-6	OK	7.76989	4.09125	-0.925352	-2.87783	5e-05	0.000725861	yes	GO:0016021; GO:0016020; GO:0055114	oxidation-reduction process; integral component of membrane; membrane	protein_coding
WBGene00000928	dao-2	II:4562852-4563546	N2	rnp-6	OK	59.4353	26.7854	-1.14987	-4.25714	5e-05	0.000725861	yes			protein_coding
WBGene00018044	F35D11.3	II:4608371-4612053	N2	rnp-6	OK	18.607	11.482	-0.696469	-2.98165	5e-05	0.000725861	yes	GO:0016021; GO:0016020	integral component of membrane; membrane	protein_coding
WBGene00001976	hmg-11	II:4672797-4673747	N2	rnp-6	OK	139.907	99.522	-0.491379	-2.28712	5e-05	0.000725861	yes	GO:0003677	DNA binding	protein_coding
WBGene00018268	F41C3.2	II:4749967-4751823	N2	rnp-6	OK	5.96065	8.23313	0.465972	1.68178	0.0036	0.0271525	yes	GO:0022857; GO:0016021; GO:0016020; GO:0006820; GO:0055085	anion transport; transmembrane transport; transmembrane transporter activity; integral component of membrane; membrane	protein_coding
WBGene00003435	msp-40	II:4825379-4825845	N2	rnp-6	OK	3.03849	6.16747	1.02132	1.92102	0.0014	0.0128195	yes	GO:0005856; GO:0005737; GO:0042995; GO:0031143	cytoplasm; cytoskeleton; cell projection; pseudopodium	protein_coding
WBGene00016351	C33F10.1	II:4835028-4835717	N2	rnp-6	OK	0.959026	2.73708	1.513	2.23896	0.0008	0.00816818	yes			protein_coding
WBGene00020867	shc-2	II:4969201-4988938	N2	rnp-6	OK	6.03011	4.23582	-0.509545	-1.75549	0.00255	0.0206975	yes	; GO:0005515	; protein binding	protein_coding
WBGene00018018	F33G12.6	II:5049914-5053957	N2	rnp-6	OK	8.40331	6.07607	-0.46782	-1.86069	0.0008	0.00816818	yes	GO:0003824	catalytic activity	protein_coding
WBGene00019022	F58A6.1	II:5142342-5144021	N2	rnp-6	OK	27.5639	13.6077	-1.01835	-3.84549	5e-05	0.000725861	yes	GO:0003824; GO:0008152	metabolic process; catalytic activity	protein_coding
WBGene00003443	msp-50	II:5199762-5200222	N2	rnp-6	OK	2.52719	5.44716	1.10797	1.9629	0.0012	0.0113201	yes	GO:0005856; GO:0005737; GO:0042995; GO:0031143	cytoplasm; cytoskeleton; cell projection; pseudopodium	protein_coding
WBGene00017133	EEED8.2	II:5416713-5418447	N2	rnp-6	OK	14.8698	7.33631	-1.01926	-3.41529	5e-05	0.000725861	yes	GO:0005215; GO:0006810; GO:0008289	transporter activity; lipid binding; transport	protein_coding
WBGene00017143	EEED8.15	II:5419247-5421091	N2	rnp-6	OK	24.88	14.8788	-0.741724	-3.03741	5e-05	0.000725861	yes			protein_coding
WBGene00023407	cex-1	II:5447678-5448440	N2	rnp-6	OK	7.2771	4.4686	-0.703541	-1.7168	0.0039	0.0289822	yes	GO:0046872; GO:0005509	calcium ion binding; metal ion binding	protein_coding
WBGene00015887	C17C3.1,C17C3.15	II:5570636-5574943	N2	rnp-6	OK	35.4901	58.8536	0.729714	2.68239	5e-05	0.000725861	yes	; GO:0005782; GO:0016021; GO:0016020; GO:0009062; GO:0006637; GO:0047617	acyl-CoA metabolic process; fatty acid catabolic process; ; acyl-CoA hydrolase activity; peroxisomal matrix; membrane; integral component of membrane	protein_coding
WBGene00015896	C17C3.1,C17C3.15	II:5570636-5574943	N2	rnp-6	OK	35.4901	58.8536	0.729714	2.68239	5e-05	0.000725861	yes			protein_coding
WBGene00019407	K05F1.5	II:5789171-5794402	N2	rnp-6	OK	8.19141	4.34835	-0.913644	-3.0162	5e-05	0.000725861	yes			protein_coding
WBGene00018874	tag-234	II:5864194-5866969	N2	rnp-6	OK	46.0313	30.1696	-0.609519	-1.89031	0.0011	0.0105816	yes			protein_coding
WBGene00017436	F13H8.3	II:6264060-6265508	N2	rnp-6	OK	5.99073	3.23616	-0.888448	-2.55805	5e-05	0.000725861	yes	GO:0006152; GO:0008477; GO:0005829	cytosol; purine nucleoside catabolic process; purine nucleosidase activity	protein_coding
WBGene00020799	T25D10.1	II:6403480-6405034	N2	rnp-6	OK	6.97348	4.24201	-0.717129	-2.19327	0.00015	0.00195025	yes	GO:0043413; GO:0016021; GO:0016020; GO:0045087; GO:0016757	transferase activity, transferring glycosyl groups; innate immune response; integral component of membrane; macromolecule glycosylation; membrane	protein_coding
WBGene00019426	cutl-16	II:6441427-6443921	N2	rnp-6	OK	3.55167	1.91452	-0.891516	-2.49161	5e-05	0.000725861	yes	GO:0016021; GO:0016020	integral component of membrane; membrane	protein_coding
WBGene00019273	H43E16.1	II:6674267-6679363	N2	rnp-6	OK	3.32451	4.41813	0.410296	1.56115	0.00655	0.043217	yes	GO:0016021; GO:0016020	integral component of membrane; membrane	protein_coding
WBGene00001064	dpy-2	II:6714291-6715997	N2	rnp-6	OK	8.82913	2.27136	-1.95872	-5.50021	5e-05	0.000725861	yes	GO:0040014; GO:0042329; GO:0042338; GO:0040032; GO:0042302; GO:0005581	regulation of multicellular organism growth; cuticle development involved in collagen and cuticulin-based cuticle molting cycle; post-embryonic body morphogenesis; structural constituent of collagen and cuticulin-based cuticle; structural constituent of cuticle; collagen trimer	protein_coding
WBGene00006636	tsp-10	II:6718534-6729302	N2	rnp-6	OK	6.14244	3.50055	-0.811232	-1.75033	0.00275	0.0219448	yes	GO:0016021; GO:0016020; GO:0005887; GO:0007166	integral component of plasma membrane; integral component of membrane; cell surface receptor signaling pathway; membrane	protein_coding
WBGene00000211	asm-1	II:6910071-6913365	N2	rnp-6	OK	20.4339	14.0816	-0.537148	-1.67977	0.0043	0.0312605	yes	GO:0016787; GO:0006629; GO:0016798; GO:0046513; GO:0005764; GO:0005576; GO:0004767; GO:0008152; GO:0006685; GO:0046872; GO:0006665	hydrolase activity, acting on glycosyl bonds; sphingomyelin phosphodiesterase activity; lysosome; extracellular region; sphingomyelin catabolic process; metabolic process; hydrolase activity; metal ion binding; lipid metabolic process; sphingolipid metabolic process; ceramide biosynthetic process	protein_coding
WBGene00016890	lst-5	II:7022926-7024930	N2	rnp-6	OK	6.99839	4.55875	-0.618385	-1.84841	0.00185	0.016033	yes	GO:0003676	nucleic acid binding	protein_coding
WBGene00020164	T02G5.4	II:7082101-7084083	N2	rnp-6	OK	6.37705	8.65143	0.440048	1.54673	0.0078	0.0492264	yes
WBGene00206521	T02G5.15	II:7087360-7087875	N2	rnp-6	OK	4.0005	1.11691	-1.84066	-2.14864	0.00345	0.0262347	yes			protein_coding
WBGene00006893	spon-1	II:7116570-7120542	N2	rnp-6	OK	6.38655	4.37649	-0.545261	-2.01302	0.00035	0.00407043	yes	GO:0016203; GO:0005604; GO:0033563; GO:0008045; GO:0055120; GO:0004867; GO:0010951; GO:0007413; GO:0005578; GO:0031430; GO:0033627	dorsal/ventral axon guidance; M band; cell adhesion mediated by integrin; muscle attachment; striated muscle dense body; motor neuron axon guidance; axonal fasciculation; basement membrane; proteinaceous extracellular matrix; serine-type endopeptidase inhibitor activity; negative regulation of endopeptidase activity	protein_coding
WBGene00016172	C27H5.2	II:7155630-7160938	N2	rnp-6	OK	4.87407	6.87458	0.496144	1.69042	0.0034	0.0259387	yes			protein_coding
WBGene00017123	maoc-1	II:7196275-7199565	N2	rnp-6	OK	129.031	80.4752	-0.681097	-3.31367	5e-05	0.000725861	yes	GO:0005778; GO:0006635; GO:0045087; GO:0016508; GO:0050829; GO:0042802	innate immune response; long-chain-enoyl-CoA hydratase activity; identical protein binding; peroxisomal membrane; fatty acid beta-oxidation; defense response to Gram-negative bacterium	protein_coding
WBGene00017970	F32A5.4	II:7228783-7230615	N2	rnp-6	OK	34.6847	52.7754	0.605565	2.66411	5e-05	0.000725861	yes	; GO:0005576	extracellular region;	protein_coding
WBGene00017969	F32A5.3	II:7232852-7238349	N2	rnp-6	OK	2.44693	5.68919	1.21725	3.07644	5e-05	0.000725861	yes	GO:0051603; GO:0004180; GO:0016787; GO:0045121; GO:0004185; GO:0006508; GO:0008233	carboxypeptidase activity; hydrolase activity; serine-type carboxypeptidase activity; peptidase activity; proteolysis involved in cellular protein catabolic process; proteolysis; membrane raft	protein_coding
WBGene00018392	insc-1	II:7359960-7364107	N2	rnp-6	OK	2.54415	1.02284	-1.3146	-1.91225	0.0017	0.0149637	yes	GO:0005488; GO:0051301	cell division; binding	protein_coding
WBGene00015569	C07D10.5	II:7381437-7383490	N2	rnp-6	OK	31.6021	19.1466	-0.722935	-3.14918	5e-05	0.000725861	yes			protein_coding
WBGene00006947	wrt-1	II:7531154-7533247	N2	rnp-6	OK	0.655078	0.0830739	-2.9792	-2.74951	0.0016	0.014229	yes	GO:0016787; GO:0005615; GO:0016540; GO:0009986; GO:0016020; GO:0016539; GO:0005576; GO:0003674; GO:0005886; GO:0007267; GO:0006508; GO:0008233; GO:0007275; GO:0007367	protein autoprocessing; extracellular space; intein-mediated protein splicing; extracellular region; molecular_function; peptidase activity; hydrolase activity; segment polarity determination; cell-cell signaling; membrane; cell surface; proteolysis; multicellular organism development; plasma membrane	protein_coding
WBGene00022893	ZK1290.13	II:7535128-7536989	N2	rnp-6	OK	10.5711	6.54245	-0.69222	-2.19286	0.0003	0.00356315	yes	GO:0016021; GO:0016020	integral component of membrane; membrane	protein_coding
WBGene00018041	F35D2.3	II:7570604-7572440	N2	rnp-6	OK	7.21412	4.63968	-0.636797	-1.95405	0.0009	0.00897191	yes	GO:0016021; GO:0016020; GO:0005515	protein binding; integral component of membrane; membrane	protein_coding
WBGene00011633	T09A5.4	II:7845661-7849797	N2	rnp-6	OK	4.33951	2.60861	-0.734253	-1.6707	0.00455	0.0326223	yes			protein_coding
WBGene00008435	glna-2	II:8008618-8011630	N2	rnp-6	OK	4.00967	2.54546	-0.655558	-2.02361	0.00055	0.00597832	yes	GO:0016787; GO:0004359; GO:0006541; GO:0005739; GO:0006537; GO:0006543; GO:0005759	glutaminase activity; hydrolase activity; glutamate biosynthetic process; mitochondrial matrix; glutamine metabolic process; mitochondrion; glutamine catabolic process	protein_coding
WBGene00008436	DH11.2	II:8012815-8015254	N2	rnp-6	OK	6.22502	11.2525	0.854092	3.0612	5e-05	0.000725861	yes			protein_coding
WBGene00000652	col-76	II:8204340-8207573	N2	rnp-6	OK	6.52111	2.97957	-1.13001	-3.5387	5e-05	0.000725861	yes	GO:0016021; GO:0016020; GO:0005581; GO:0042302	structural constituent of cuticle; collagen trimer; integral component of membrane; membrane	protein_coding
WBGene00009403	F35C11.4	II:8249919-8251981	N2	rnp-6	OK	3.04477	4.75235	0.64231	1.89032	0.00145	0.013173	yes	GO:0016021; GO:0016020	integral component of membrane; membrane	protein_coding
WBGene00009899	efl-3	II:8412670-8416855	N2	rnp-6	OK	14.7945	8.49508	-0.80036	-3.28431	5e-05	0.000725861	yes	GO:0003700; GO:0005634; GO:0006355; GO:0006351; GO:0005667; GO:0003677	regulation of transcription, DNA-templated; DNA binding; nucleus; DNA binding transcription factor activity; transcription factor complex; transcription, DNA-templated	protein_coding
WBGene00008803	lips-10	II:8439149-8442152	N2	rnp-6	OK	16.8227	28.0126	0.73567	2.98048	5e-05	0.000725861	yes	GO:0016787	hydrolase activity	protein_coding
WBGene00001523	gbh-2	II:8485937-8508965	N2	rnp-6	OK	16.4318	8.69743	-0.917834	-2.55185	5e-05	0.000725861	yes	GO:0031418; GO:0050353; GO:0045329; GO:0005506; GO:0055114; GO:0016491	carnitine biosynthetic process; oxidoreductase activity; iron ion binding; oxidation-reduction process; L-ascorbic acid binding; trimethyllysine dioxygenase activity	protein_coding
WBGene00004155	pqn-73	II:8540719-8545452	N2	rnp-6	OK	1.51141	0.250986	-2.59022	-4.77803	5e-05	0.000725861	yes	GO:0016021; GO:0016020	integral component of membrane; membrane	protein_coding
WBGene00007919	C34C6.7	II:8707154-8708854	N2	rnp-6	OK	43.4266	26.3487	-0.720849	-3.09451	5e-05	0.000725861	yes	; GO:0005764; GO:0006897; GO:0005575; GO:0003674; GO:1905146	; lysosome; lysosomal protein catabolic process; molecular_function; cellular_component; endocytosis	protein_coding
WBGene00000220	atf-2	II:8751985-8753939	N2	rnp-6	OK	3.71032	1.04575	-1.82701	-4.038	5e-05	0.000725861	yes	GO:0043565; GO:0007623; GO:0000122; GO:0003700; GO:0005634; GO:0001012; GO:0006355; GO:0005515; GO:0001078	negative regulation of transcription from RNA polymerase II promoter; circadian rhythm; regulation of transcription, DNA-templated; nucleus; DNA binding transcription factor activity; protein binding; transcriptional repressor activity, RNA polymerase II proximal promoter sequence-specific DNA binding; RNA polymerase II regulatory region DNA binding; sequence-specific DNA binding	protein_coding
WBGene00014307	F07H5.3	II:8784534-8785513	N2	rnp-6	OK	86.3308	59.5625	-0.53547	-2.4654	5e-05	0.000725861	yes
WBGene00014309	F07H5.5	II:8787769-8789716	N2	rnp-6	OK	327.242	254.803	-0.360976	-1.9274	0.00125	0.0117015	yes
WBGene00008563	F07H5.13	II:8790557-8791376	N2	rnp-6	OK	23.1687	9.31145	-1.3151	-4.30631	5e-05	0.000725861	yes			protein_coding
WBGene00007180	B0457.6	II:8922451-8924373	N2	rnp-6	OK	8.90723	12.9069	0.535097	1.5569	0.00735	0.0471344	yes			protein_coding
WBGene00012322	W07A12.4	II:9148355-9152311	N2	rnp-6	OK	0.99109	0.354267	-1.48418	-2.29019	0.00105	0.0101691	yes	GO:0005515	protein binding	protein_coding
WBGene00014208	ZK1067.2	II:9213701-9222794	N2	rnp-6	OK	29.6697	38.171	0.363489	1.95842	0.00055	0.00597832	yes	GO:0003700; GO:0006355; GO:0005634; GO:0008270	regulation of transcription, DNA-templated; nucleus; DNA binding transcription factor activity; zinc ion binding	protein_coding
WBGene00001761	gst-13	II:9231496-9232341	N2	rnp-6	OK	56.0408	36.4403	-0.620943	-2.64261	5e-05	0.000725861	yes	GO:0016740; GO:0045087; GO:0005515	transferase activity; protein binding; innate immune response	protein_coding
WBGene00007228	acs-7	II:9292016-9295753	N2	rnp-6	OK	30.6783	11.7796	-1.38093	-5.81692	5e-05	0.000725861	yes	GO:0003824; GO:0008152	metabolic process; catalytic activity	protein_coding
WBGene00045404	C06C3.11	II:9378556-9379596	N2	rnp-6	OK	1.65655	0.75232	-1.13876	-1.86631	0.00335	0.0256524	yes
WBGene00009447	F35H8.2	II:9555502-9557492	N2	rnp-6	OK	4.42225	2.96894	-0.574832	-1.57691	0.00685	0.0447412	yes	GO:0008375; GO:0016021; GO:0016020	acetylglucosaminyltransferase activity; integral component of membrane; membrane	protein_coding
WBGene00000372	cyp-13A7	II:9803619-9805510	N2	rnp-6	OK	2.1015	0.756042	-1.47488	-3.12271	5e-05	0.000725861	yes	GO:0004497; GO:0020037; GO:0016705; GO:0005506; GO:0046872; GO:0055114; GO:0016491	oxidoreductase activity; iron ion binding; oxidoreductase activity, acting on paired donors, with incorporation or reduction of molecular oxygen; metal ion binding; heme binding; monooxygenase activity; oxidation-reduction process	protein_coding
WBGene00007331	pho-11	II:9931844-9936893	N2	rnp-6	OK	29.4299	9.24357	-1.67076	-2.64613	0.00015	0.00195025	yes	GO:0016311; GO:0016787; GO:0003993	hydrolase activity; acid phosphatase activity; dephosphorylation	protein_coding
WBGene00014173	ZK970.7	II:10310399-10316219	N2	rnp-6	OK	2.09217	0.923528	-1.17977	-2.04059	0.00175	0.015327	yes			protein_coding
WBGene00010893	cutl-9	II:10622280-10626434	N2	rnp-6	OK	1.47782	0.53416	-1.46812	-3.00757	5e-05	0.000725861	yes	GO:0016021; GO:0016020	integral component of membrane; membrane	protein_coding
WBGene00004704	rsp-7	II:10659207-10665090	N2	rnp-6	OK	94.2263	130.907	0.474341	2.42143	5e-05	0.000725861	yes	; GO:0005634; GO:0000398; GO:0003723; GO:0003676; GO:0008380; GO:0006397	; nucleic acid binding; RNA binding; RNA splicing; mRNA processing; nucleus; mRNA splicing, via spliceosome	protein_coding
WBGene00000656	col-80	II:10695053-10714299	N2	rnp-6	OK	53.6355	100.146	0.900844	2.58956	5e-05	0.000725861	yes	GO:0005581; GO:0042302	structural constituent of cuticle; collagen trimer	protein_coding
WBGene00001153	ech-4	II:10821030-10824079	N2	rnp-6	OK	92.7499	140.863	0.602871	2.68895	5e-05	0.000725861	yes	GO:0003824; GO:0006635; GO:0000062; GO:0008152; GO:0019915	metabolic process; catalytic activity; fatty-acyl-CoA binding; lipid storage; fatty acid beta-oxidation	protein_coding
WBGene00010988	metr-1	II:10926560-10931077	N2	rnp-6	OK	72.4945	90.4388	0.319072	1.70873	0.00295	0.0231897	yes	GO:0031419; GO:0008652; GO:0032259; GO:0008898; GO:0005829; GO:0009086; GO:0044237; GO:0005622; GO:0016740; GO:0008705; GO:0008270; GO:0008168; GO:0046872; GO:0042558	methionine synthase activity; cobalamin binding; S-adenosylmethionine-homocysteine S-methyltransferase activity; pteridine-containing compound metabolic process; methylation; cytosol; transferase activity; intracellular; methionine biosynthetic process; zinc ion binding; methyltransferase activity; metal ion binding; cellular amino acid biosynthetic process; cellular metabolic process	protein_coding
WBGene00002957	let-858	II:11022369-11027920	N2	rnp-6	OK	69.2317	85.6772	0.307479	1.62976	0.0043	0.0312605	yes	GO:0016607; GO:0007369; GO:0042078; GO:0005634; GO:0030154; GO:0071006; GO:0000398; GO:0005654; GO:0000790; GO:0003723; GO:0005515; GO:0043073; GO:0005488; GO:0071013; GO:0008380; GO:0005681; GO:0006397	nuclear chromatin; catalytic step 2 spliceosome; nucleoplasm; RNA binding; RNA splicing; germ-line stem cell division; mRNA processing; spliceosomal complex; U2-type catalytic step 1 spliceosome; cell differentiation; nucleus; protein binding; binding; germ cell nucleus; mRNA splicing, via spliceosome; gastrulation; nuclear speck	protein_coding
WBGene00011524	T06D8.3	II:11222302-11226548	N2	rnp-6	OK	0.668273	0.196491	-1.76597	-2.01616	0.00665	0.0436819	yes	GO:0006644; GO:0016021; GO:0016020; GO:0007165; GO:0005887; GO:0046839; GO:0008195; GO:0042577	phosphatidate phosphatase activity; lipid phosphatase activity; integral component of plasma membrane; signal transduction; membrane; phospholipid metabolic process; phospholipid dephosphorylation; integral component of membrane	protein_coding
WBGene00011995	rsf-1	II:11306398-11311940	N2	rnp-6	OK	13.7832	10.687	-0.36705	-1.51188	0.0074	0.0473757	yes	GO:0035556; GO:0046872; GO:0007165; GO:0005622	intracellular; signal transduction; intracellular signal transduction; metal ion binding	protein_coding
WBGene00007340	C05D12.2	II:11418313-11423381	N2	rnp-6	OK	5.95235	3.45181	-0.786104	-2.94267	5e-05	0.000725861	yes	GO:0005515	protein binding	protein_coding
WBGene00014666	C05D12.3	II:11424829-11430599	N2	rnp-6	OK	1.42005	4.43156	1.64187	5.32064	5e-05	0.000725861	yes			protein_coding
WBGene00043534	W02B12.13	II:11445288-11448899	N2	rnp-6	OK	1.45572	0.563218	-1.36996	-1.96234	0.00215	0.018108	yes			protein_coding
WBGene00010050	F54D5.4	II:11569817-11571002	N2	rnp-6	OK	107.003	68.5765	-0.641869	-2.91153	5e-05	0.000725861	yes	GO:0045087	innate immune response	protein_coding
WBGene00008548	F07A11.5	II:11612274-11614391	N2	rnp-6	OK	8.34463	5.51858	-0.596551	-1.85252	0.0017	0.0149637	yes	GO:0005737; GO:0019200; GO:0005975; GO:0016310; GO:0005634; GO:0016301; GO:0000166; GO:0046835; GO:0016740; GO:0004747; GO:0006014; GO:0019303; GO:0046872; GO:0005524	D-ribose catabolic process; ribokinase activity; carbohydrate phosphorylation; D-ribose metabolic process; transferase activity; carbohydrate metabolic process; phosphorylation; kinase activity; nucleus; ATP binding; cytoplasm; carbohydrate kinase activity; nucleotide binding; metal ion binding	protein_coding
WBGene00008741	F13D12.6	II:11739455-11748611	N2	rnp-6	OK	52.7846	77.802	0.55969	2.5004	0.0001	0.00135972	yes	GO:0016787; GO:0051603; GO:0004180; GO:0004185; GO:0006508; GO:0008233	carboxypeptidase activity; hydrolase activity; serine-type carboxypeptidase activity; peptidase activity; proteolysis involved in cellular protein catabolic process; proteolysis	protein_coding
WBGene00009692	F44E5.5	II:11759680-11761852	N2	rnp-6	OK	2.18602	0.797387	-1.45496	-3.34929	5e-05	0.000725861	yes	GO:0005524; GO:0000166	nucleotide binding; ATP binding	protein_coding
WBGene00194848	T27D12.6	II:11835585-11837621	N2	rnp-6	OK	3.15497	0.811815	-1.9584	-2.24715	0.0028	0.0222533	yes			protein_coding
WBGene00010787	K12D12.5	II:11861037-11865457	N2	rnp-6	OK	21.2393	27.0026	0.346363	1.62186	0.0047	0.0334361	yes	GO:0090502; GO:0004523; GO:0003676	nucleic acid binding; RNA phosphodiester bond hydrolysis, endonucleolytic; RNA-DNA hybrid ribonuclease activity	protein_coding
WBGene00004394	rol-1	II:12172572-12176071	N2	rnp-6	OK	0.127973	0.472279	1.8838	2.02317	0.0044	0.0318201	yes	GO:0016021; GO:0016020; GO:0042302	structural constituent of cuticle; integral component of membrane; membrane	protein_coding
WBGene00013260	rsr-2	II:12225357-12227291	N2	rnp-6	OK	87.1502	114.138	0.3892	2.00815	0.00055	0.00597832	yes	GO:0016607; GO:0000790	nuclear chromatin; nuclear speck	protein_coding
WBGene00013263	Y57A10A.23	II:12240387-12242090	N2	rnp-6	OK	30.5151	15.5178	-0.975603	-3.46105	5e-05	0.000725861	yes	GO:0060548; GO:0045454; GO:0030154; GO:0005783	cell redox homeostasis; negative regulation of cell death; endoplasmic reticulum; cell differentiation	protein_coding
WBGene00013270	Y57A10A.31	II:12289404-12300560	N2	rnp-6	OK	39.5939	49.0399	0.308679	1.62438	0.00535	0.0369777	yes	GO:0097039; GO:0005515; GO:0043161; GO:0043130; GO:0008270; GO:0008152; GO:0071797; GO:0046872; GO:0004842; GO:0055114; GO:0016491	LUBAC complex; protein binding; protein linear polyubiquitination; oxidoreductase activity; zinc ion binding; metabolic process; ubiquitin-protein transferase activity; metal ion binding; ubiquitin binding; proteasome-mediated ubiquitin-dependent protein catabolic process; oxidation-reduction process	protein_coding
WBGene00012585	lips-15	II:12605967-12607027	N2	rnp-6	OK	29.6059	44.028	0.572537	2.45679	5e-05	0.000725861	yes	GO:0016787	hydrolase activity	protein_coding
WBGene00012593	nspe-7	II:12627186-12627562	N2	rnp-6	OK	15.477	24.6303	0.670306	1.73593	0.00255	0.0206975	yes			protein_coding
WBGene00009396	clec-65	II:12901293-12903335	N2	rnp-6	OK	108.829	82.1906	-0.405011	-2.05584	0.0002	0.00250605	yes	GO:0030246	carbohydrate binding	protein_coding
WBGene00010266	dct-18	II:12930616-12933524	N2	rnp-6	OK	75.636	51.5378	-0.553441	-2.55263	5e-05	0.000725861	yes			protein_coding
WBGene00006999	zyx-1	II:13056813-13071530	N2	rnp-6	OK	13.9874	18.4381	0.39857	1.54273	0.0075	0.0478343	yes	GO:0005856; GO:0005737; GO:0042995; GO:0005925; GO:0015629; GO:0007399; GO:0005634; GO:0099558; GO:0030424; GO:0055120; GO:0008270; GO:0005515; GO:0007155; GO:0017151; GO:0046872; ; GO:0031430; GO:0030054; GO:0000003	; M band; cell projection; cytoplasm; DEAD/H-box RNA helicase binding; striated muscle dense body; maintenance of synapse structure; zinc ion binding; axon; focal adhesion; nucleus; metal ion binding; reproduction; protein binding; cell adhesion; cytoskeleton; actin cytoskeleton; nervous system development; cell junction	protein_coding
WBGene00012994	Y48C3A.12	II:13376411-13388762	N2	rnp-6	OK	27.4803	36.6499	0.41541	2.01494	0.00025	0.00303907	yes	GO:0005737; GO:0003700; GO:0005634; GO:0006355	cytoplasm; nucleus; DNA binding transcription factor activity; regulation of transcription, DNA-templated	protein_coding
WBGene00006404	tag-10	II:13632654-13636982	N2	rnp-6	OK	10.8952	15.4428	0.503241	1.99117	0.00075	0.00772691	yes	GO:0045121; GO:0005515	protein binding; membrane raft	protein_coding
WBGene00013209	bub-3	II:13726061-13729610	N2	rnp-6	OK	109.675	134.773	0.29729	1.53852	0.0072	0.0464409	yes	GO:0033597; GO:0007049; GO:0051321; GO:0051726; GO:0005634; GO:0043130; GO:0033316; GO:0005654; GO:0009792; GO:0000776; GO:0005515; GO:0007094; GO:1990298; GO:0005694; GO:0000775; GO:0051301; GO:0000777	kinetochore; chromosome, centromeric region; embryo development ending in birth or egg hatching; bub1-bub3 complex; meiotic spindle assembly checkpoint; mitotic checkpoint complex; cell division; protein binding; mitotic spindle assembly checkpoint; condensed chromosome kinetochore; nucleoplasm; regulation of cell cycle; nucleus; meiotic cell cycle; ubiquitin binding; cell cycle; chromosome	protein_coding
WBGene00011055	arrd-14	II:13752319-13756257	N2	rnp-6	OK	4.81162	2.87682	-0.742046	-2.01	0.0006	0.00643061	yes			protein_coding
WBGene00012198	W02B8.2	II:13908924-13915253	N2	rnp-6	OK	41.6172	23.0474	-0.852575	-4.35094	5e-05	0.000725861	yes	GO:0035556; GO:0046872; GO:0005622	intracellular; intracellular signal transduction; metal ion binding	protein_coding
WBGene00001971	hmg-1.1	II:14250694-14251448	N2	rnp-6	OK	415.289	507.547	0.289426	1.53717	0.0078	0.0492264	yes	GO:0005634; GO:0003677	DNA binding; nucleus	protein_coding
WBGene00007999	tag-297	II:14627629-14630122	N2	rnp-6	OK	1.04425	0.440959	-1.24375	-2.33573	0.00065	0.0068644	yes			protein_coding
WBGene00013852	hhat-1	II:14675262-14684296	N2	rnp-6	OK	0.979224	0.237858	-2.04154	-2.30703	0.0041	0.0300971	yes	GO:0016021; GO:0016020; GO:0016746; GO:0016740	transferase activity; transferase activity, transferring acyl groups; integral component of membrane; membrane	protein_coding
WBGene00001225	eif-3.B	II:14795403-14798234	N2	rnp-6	OK	119.726	147.925	0.305131	1.62539	0.00465	0.03317	yes	GO:0005737; GO:0005852; GO:0006446; GO:0003723; GO:0031369; GO:0006413; GO:0006412; GO:0003743	regulation of translational initiation; eukaryotic translation initiation factor 3 complex; RNA binding; cytoplasm; translation initiation factor binding; translation initiation factor activity; translational initiation; translation	protein_coding
WBGene00011042	R05H10.1	II:14852429-14853627	N2	rnp-6	OK	19.3088	35.1388	0.863809	3.43429	5e-05	0.000725861	yes	GO:0005737; GO:0006807; GO:0008080	cytoplasm; N-acetyltransferase activity; nitrogen compound metabolic process	protein_coding
WBGene00008443	pde-3	II:14919704-14953312	N2	rnp-6	OK	2.90669	4.18498	0.525845	1.7479	0.0021	0.0177668	yes	GO:0030827; GO:0016787; GO:0006935; GO:0008081; GO:0004114; GO:0010446; GO:0042542; GO:0007602; GO:0010628; GO:0007165; GO:0008340; GO:0046872; GO:0007635	hydrolase activity; signal transduction; response to hydrogen peroxide; response to alkaline pH; phototransduction; phosphoric diester hydrolase activity; chemotaxis; 3',5'-cyclic-nucleotide phosphodiesterase activity; metal ion binding; positive regulation of gene expression; chemosensory behavior; negative regulation of cGMP biosynthetic process; determination of adult lifespan	protein_coding
WBGene00044720	Y53F4B.42	II:14969647-14977000	N2	rnp-6	OK	12.9072	18.8087	0.543228	1.7808	0.00225	0.0187814	yes	GO:0008168; GO:0016740; GO:0032259	transferase activity; methyltransferase activity; methylation	protein_coding
WBGene00016080	C24H12.11	II:427602-429152	N2	rnp-6	OK	1.99718	0.85358	-1.22636	-2.32933	0.0003	0.00356315	yes
WBGene00020834	T27A1.2	II:530847-533184	N2	rnp-6	OK	5.58225	13.1856	1.24005	4.17489	5e-05	0.000725861	yes			protein_coding
WBGene00021095	mlt-8	II:569268-572110	N2	rnp-6	OK	11.4544	4.17212	-1.45705	-4.36111	5e-05	0.000725861	yes	GO:0006689; GO:0008047; GO:0043085	ganglioside catabolic process; positive regulation of catalytic activity; enzyme activator activity	protein_coding
WBGene00019927	fbxc-24	II:907534-908781	N2	rnp-6	OK	5.0097	2.86832	-0.804516	-2.20055	0.00025	0.00303907	yes			protein_coding
WBGene00019700	btb-11	II:1023700-1024786	N2	rnp-6	OK	9.11285	6.18112	-0.560032	-1.70394	0.0035	0.0265526	yes	GO:0005515	protein binding	protein_coding
WBGene00019705	fbxb-45	II:1042968-1044025	N2	rnp-6	OK	8.0556	5.33625	-0.594165	-1.79844	0.0026	0.0210083	yes	GO:0005515	protein binding	protein_coding
WBGene00020476	T13B5.9	II:1101370-1104505	N2	rnp-6	OK	1.41721	0.615505	-1.20321	-2.09087	0.00185	0.016033	yes	GO:0007155; GO:0006508; GO:0016020; GO:0004222	cell adhesion; proteolysis; metalloendopeptidase activity; membrane	protein_coding
WBGene00021791	Y51H7C.13	II:1463265-1467367	N2	rnp-6	OK	0.242013	0.710865	1.55449	1.9168	0.0051	0.0356206	yes			protein_coding
WBGene00015597	fbxa-162	II:1607868-1609014	N2	rnp-6	OK	2.75848	1.44694	-0.930866	-2.00868	0.0017	0.0149637	yes
WBGene00015598	fbxa-163	II:1609254-1610715	N2	rnp-6	OK	2.87614	22.4029	2.96148	9.61563	5e-05	0.000725861	yes	GO:0005515	protein binding	protein_coding
WBGene00044417	C08F1.11	II:1783450-1784442	N2	rnp-6	OK	3.60996	2.03672	-0.825736	-1.87322	0.0028	0.0222533	yes	GO:0016021; GO:0016020	integral component of membrane; membrane	protein_coding
WBGene00015613	C08F1.10	II:1785261-1786277	N2	rnp-6	OK	22.5043	12.5179	-0.846208	-3.11743	5e-05	0.000725861	yes	GO:0016021; GO:0016020	integral component of membrane; membrane	protein_coding
WBGene00219728	linc-16	II:1820241-1820946	N2	rnp-6	OK	7.10125	3.53579	-1.00604	-2.26392	0.0003	0.00356315	yes
WBGene00020364	T08E11.8	II:1833626-1835783	N2	rnp-6	OK	0.128633	0.420456	1.70869	1.82513	0.00695	0.0452297	yes			protein_coding
WBGene00015014	bath-24	II:2044623-2045585	N2	rnp-6	OK	4.1331	6.4194	0.635216	1.69796	0.0035	0.0265526	yes	GO:0005515	protein binding	protein_coding
WBGene00016553	C40A11.10	II:2136531-2137300	N2	rnp-6	OK	14.438	4.16259	-1.79431	-3.68564	5e-05	0.000725861	yes
WBGene00019587	K09F6.4	II:2262196-2265461	N2	rnp-6	OK	0.3594	0.893258	1.31348	2.56581	0.0001	0.00135972	yes	GO:0016021; GO:0016020	integral component of membrane; membrane	protein_coding
WBGene00019589	K09F6.6	II:2274875-2279146	N2	rnp-6	OK	0.64905	1.1454	0.81945	2.0033	0.0009	0.00897191	yes	GO:0005634	nucleus	protein_coding
WBGene00015112	B0281.5	II:2299847-2300882	N2	rnp-6	OK	40.8938	28.2585	-0.5332	-2.17318	0.0001	0.00135972	yes	GO:0051260; GO:0005515	protein binding; protein homooligomerization	protein_coding
WBGene00018353	fbxa-182	II:2409642-2412741	N2	rnp-6	OK	1.96648	3.75246	0.93222	2.82596	5e-05	0.000725861	yes			protein_coding
WBGene00006647	tsr-1	II:2460845-2472862	N2	rnp-6	OK	11.2276	14.5604	0.37501	1.71285	0.003	0.0235082	yes	GO:0005737; GO:0008565; GO:0008139; GO:0031965; GO:0005634; GO:0006606; GO:0005488	protein transporter activity; cytoplasm; binding; protein import into nucleus; nucleus; nuclear membrane; nuclear localization sequence binding	protein_coding
WBGene00017250	F08D12.7	II:2767247-2769130	N2	rnp-6	OK	2.30535	1.07002	-1.10734	-2.19117	0.0007	0.00728567	yes			protein_coding
WBGene00019687	K12H6.7	II:2834952-2836628	N2	rnp-6	OK	5.06074	3.18857	-0.666438	-1.72868	0.0038	0.0283741	yes			protein_coding
WBGene00021296	Y25C1A.13	II:3109370-3111227	N2	rnp-6	OK	61.4164	128.208	1.06179	5.24944	5e-05	0.000725861	yes	GO:0003824; GO:0008152	metabolic process; catalytic activity	protein_coding
WBGene00015913	C17F4.7	II:3245086-3246015	N2	rnp-6	OK	788.008	978.469	0.312316	1.67201	0.0041	0.0300971	yes			protein_coding
WBGene00015912	fbxc-50	II:3246314-3248118	N2	rnp-6	OK	41.1046	54.4486	0.405595	1.89089	0.001	0.0097769	yes			protein_coding
WBGene00023036	F39E9.10	II:3302760-3303750	N2	rnp-6	OK	12.7401	8.86441	-0.523279	-1.57268	0.0062	0.0413837	yes
WBGene00017557	nep-11	II:3416837-3425532	N2	rnp-6	OK	2.57931	3.58857	0.476421	1.63145	0.00545	0.0375212	yes	GO:0016787; GO:0004222; GO:0016021; GO:0016020; GO:0005886; GO:0006508; GO:0008233; GO:0046872; GO:0008237	hydrolase activity; metalloendopeptidase activity; peptidase activity; metal ion binding; membrane; metallopeptidase activity; proteolysis; integral component of membrane; plasma membrane	protein_coding
WBGene00000647	col-71	II:3500072-3502449	N2	rnp-6	OK	0.741267	1.45088	0.968861	1.76315	0.0025	0.0203879	yes	GO:0016021; GO:0016020; GO:0005581; GO:0042302	structural constituent of cuticle; collagen trimer; integral component of membrane; membrane	protein_coding
WBGene00019641	K10G6.4	II:3972819-3974968	N2	rnp-6	OK	0.689995	0.259914	-1.40855	-1.90107	0.0043	0.0312605	yes			protein_coding
WBGene00023318	K07D4.1	II:4048524-4049129	N2	rnp-6	OK	3.27921	5.77746	0.817088	1.59375	0.00735	0.0471344	yes
WBGene00019858	R03H10.6	II:4171293-4173875	N2	rnp-6	OK	0.468233	0.845525	0.85262	1.57642	0.00715	0.0462067	yes	GO:0003690	double-stranded DNA binding	protein_coding
WBGene00021797	plep-1	II:4309724-4312215	N2	rnp-6	OK	3.26433	2.14431	-0.606272	-1.5684	0.0067	0.0439419	yes	GO:0016021; GO:0016020	integral component of membrane; membrane	protein_coding
WBGene00015116	B0286.3	II:4368489-4372568	N2	rnp-6	OK	7.07587	4.91589	-0.525455	-1.70429	0.0039	0.0289822	yes	GO:0004638; GO:0016829; GO:0016831; GO:0000166; GO:0004639; GO:0003824; GO:0006189; GO:0042802; GO:0008152; GO:0006164; GO:0016874; GO:0005524	carboxy-lyase activity; phosphoribosylaminoimidazole carboxylase activity; purine nucleotide biosynthetic process; lyase activity; catalytic activity; identical protein binding; metabolic process; ligase activity; ATP binding; 'de novo' IMP biosynthetic process; nucleotide binding; phosphoribosylaminoimidazolesuccinocarboxamide synthase activity	protein_coding
WBGene00044383	T05A7.11	II:4659284-4665445	N2	rnp-6	OK	0.572735	0.136324	-2.07083	-3.36496	5e-05	0.000725861	yes	GO:0036065; GO:0006486; GO:0016020; GO:0008417; GO:0000139; GO:0046920	protein glycosylation; alpha-(1->3)-fucosyltransferase activity; Golgi membrane; membrane; fucosylation; fucosyltransferase activity	protein_coding
WBGene00016359	fbxb-88	II:4826506-4827872	N2	rnp-6	OK	5.38849	3.2112	-0.74677	-2.08881	0.00065	0.0068644	yes	GO:0005515	protein binding	protein_coding
WBGene00000609	col-20	II:4869606-4870791	N2	rnp-6	OK	944.795	1152.64	0.286868	1.53119	0.00765	0.048545	yes	GO:0016021; GO:0016020; GO:0005581; GO:0042302	structural constituent of cuticle; collagen trimer; integral component of membrane; membrane	protein_coding
WBGene00019895	aagr-2	II:4914493-4925248	N2	rnp-6	OK	118.073	85.9628	-0.457899	-2.44593	5e-05	0.000725861	yes	GO:0016787; GO:0005975; GO:0005980; GO:0030246; GO:0016798; GO:0005764; GO:0003824; GO:0008152; GO:0004553; GO:0004558	hydrolase activity, acting on glycosyl bonds; carbohydrate binding; hydrolase activity, hydrolyzing O-glycosyl compounds; hydrolase activity; catalytic activity; carbohydrate metabolic process; alpha-1,4-glucosidase activity; glycogen catabolic process; metabolic process; lysosome	protein_coding
WBGene00004221	ptr-6	II:5242464-5246837	N2	rnp-6	OK	1.50464	0.978647	-0.620554	-1.66812	0.0051	0.0356206	yes	GO:0016021; GO:0016020; GO:0018996	molting cycle, collagen and cuticulin-based cuticle; integral component of membrane; membrane	protein_coding
WBGene00022781	pmt-1	II:5278136-5282525	N2	rnp-6	OK	289.033	229.218	-0.334514	-1.7714	0.00215	0.018108	yes	GO:0005737; GO:0032504; GO:0005829; GO:0002119; GO:0070832; GO:0016740; GO:0000234; GO:0008152; GO:0008168; GO:0032259	phosphoethanolamine N-methyltransferase activity; phosphatidylcholine biosynthesis from phosphoryl-ethanolamine via N-dimethylethanolamine phosphate and CDP-choline; nematode larval development; methylation; cytosol; transferase activity; metabolic process; methyltransferase activity; cytoplasm; multicellular organism reproduction	protein_coding
WBGene00017291	F09E5.14	II:5342671-5344877	N2	rnp-6	OK	22.8497	33.4666	0.550544	1.85157	0.00125	0.0117015	yes			protein_coding
WBGene00017220	F07F6.8	II:5424141-5425733	N2	rnp-6	OK	84.8257	64.3334	-0.398935	-1.94662	0.0009	0.00897191	yes	GO:0042157; GO:0005576; GO:0008289; GO:0006869	extracellular region; lipid transport; lipoprotein metabolic process; lipid binding	protein_coding
WBGene00002096	acdh-2,ins-13	II:5544584-5547490	N2	rnp-6	OK	17.063	9.79554	-0.800674	-2.87408	5e-05	0.000725861	yes	GO:0005179; GO:0005576	extracellular region; hormone activity	protein_coding
WBGene00015894	acdh-2,ins-13	II:5544584-5547490	N2	rnp-6	OK	17.063	9.79554	-0.800674	-2.87408	5e-05	0.000725861	yes	GO:0050660; GO:0016627; GO:0008152; GO:0003995; GO:0055114; GO:0016491	oxidoreductase activity, acting on the CH-CH group of donors; flavin adenine dinucleotide binding; oxidoreductase activity; metabolic process; oxidation-reduction process; acyl-CoA dehydrogenase activity	protein_coding
WBGene00019124	F59E12.9	II:5640060-5647042	N2	rnp-6	OK	35.0379	43.3104	0.3058	1.61763	0.00455	0.0326223	yes	GO:0003779; GO:0051017; GO:0051015	actin filament binding; actin filament bundle assembly; actin binding	protein_coding
WBGene00016119	C25H3.10	II:5696624-5698958	N2	rnp-6	OK	32.8367	41.8856	0.351145	1.54532	0.0075	0.0478343	yes	GO:0005515	protein binding	protein_coding
WBGene00044296	F10C1.9	II:5743125-5745284	N2	rnp-6	OK	13.4346	8.85303	-0.60171	-1.85115	0.0015	0.0135324	yes			protein_coding
WBGene00019409	K05F1.8	II:5799317-5799658	N2	rnp-6	OK	0.674461	0	-inf		0.00135	0.0124346	yes	GO:0016021; GO:0016020	integral component of membrane; membrane	protein_coding
WBGene00002268	lec-5	II:5839637-5841134	N2	rnp-6	OK	62.3163	77.7	0.318305	1.54581	0.0075	0.0478343	yes	GO:0045121; GO:0030246	carbohydrate binding; membrane raft	protein_coding
WBGene00016215	glb-10	II:6308113-6309300	N2	rnp-6	OK	1.34184	2.33522	0.799346	1.59655	0.0065	0.0429476	yes	GO:0005344; GO:0019825; GO:0020037; GO:0006810; GO:0005886; GO:0015671	oxygen binding; oxygen transport; oxygen carrier activity; plasma membrane; heme binding; transport	protein_coding
WBGene00002980	lgg-1	II:6346956-6347719	N2	rnp-6	OK	1096.31	788.91	-0.474725	-2.53556	5e-05	0.000725861	yes	GO:0005737; GO:0040024; GO:0006914; GO:0006995; GO:0000421; GO:0000422; GO:0031410; GO:0005634; GO:0005776; GO:0005739; GO:0000045; GO:0012501; GO:0050830; GO:0005741; GO:0005515; GO:0008340; GO:0010940; GO:0005829; GO:0000407	dauer larval development; autophagosome membrane; positive regulation of necrotic cell death; cytosol; cytoplasm; cellular response to nitrogen starvation; autophagy; cytoplasmic vesicle; autophagosome assembly; nucleus; determination of adult lifespan; protein binding; mitochondrion; phagophore assembly site; defense response to Gram-positive bacterium; mitochondrial outer membrane; programmed c…	protein_coding
WBGene00016974	lron-15	II:6540216-6544892	N2	rnp-6	OK	0.863437	0.492571	-0.809758	-1.95591	0.00075	0.00772691	yes	GO:0005887; GO:0005515	integral component of plasma membrane; protein binding	protein_coding
WBGene00016004	C18H9.6	II:6700657-6701625	N2	rnp-6	OK	42.7921	27.3005	-0.648415	-2.64195	5e-05	0.000725861	yes			protein_coding
WBGene00001072	dpy-10	II:6710149-6712932	N2	rnp-6	OK	10.15	5.67516	-0.838749	-2.97698	5e-05	0.000725861	yes	GO:0040011; GO:0040002; GO:0005581; ; GO:0042329; GO:0042338; GO:0005576; GO:0040032; GO:0042302	; collagen and cuticulin-based cuticle development; cuticle development involved in collagen and cuticulin-based cuticle molting cycle; post-embryonic body morphogenesis; extracellular region; structural constituent of collagen and cuticulin-based cuticle; locomotion; structural constituent of cuticle; collagen trimer	protein_coding
WBGene00044316	F41G3.21	II:6752351-6752950	N2	rnp-6	OK	2.01387	5.00279	1.31277	2.35454	0.0002	0.00250605	yes			protein_coding
WBGene00018304	agr-1	II:6760682-6775176	N2	rnp-6	OK	1.9081	0.970062	-0.97599	-2.21103	0.00025	0.00303907	yes	GO:0005605; GO:0007213; GO:0043236; GO:0002162; GO:0005515; GO:0005886; GO:0043113	protein binding; receptor clustering; laminin binding; dystroglycan binding; G-protein coupled acetylcholine receptor signaling pathway; plasma membrane; basal lamina	protein_coding
WBGene00016625	aff-1	II:6860581-6863752	N2	rnp-6	OK	0.681147	0.314791	-1.11357	-1.82347	0.0035	0.0265526	yes	GO:0044291; GO:0016324; GO:0016021; GO:0016020; GO:0043229; GO:0005576; GO:0005886; GO:0000768; GO:0045026; GO:0007275; GO:0046662	syncytium formation by plasma membrane fusion; regulation of oviposition; extracellular region; apical plasma membrane; plasma membrane fusion; intracellular organelle; membrane; multicellular organism development; integral component of membrane; plasma membrane; cell-cell contact zone	protein_coding
WBGene00016631	C44B7.11	II:6894157-6897531	N2	rnp-6	OK	7.50666	5.49783	-0.449309	-1.77839	0.00215	0.018108	yes	GO:0016787; GO:0005783; GO:0016021; GO:0016020; GO:0005789; GO:0006508; GO:0008233; GO:0046872; GO:0008237	endoplasmic reticulum membrane; hydrolase activity; endoplasmic reticulum; peptidase activity; metal ion binding; membrane; metallopeptidase activity; proteolysis; integral component of membrane	protein_coding
WBGene00017702	F22D3.6	II:6947873-6951300	N2	rnp-6	OK	4.1392	2.55464	-0.69623	-2.15918	0.00025	0.00303907	yes	GO:0006508; GO:0004197; GO:0005515	protein binding; proteolysis; cysteine-type endopeptidase activity	protein_coding
WBGene00006344	sup-39	II:6967903-6970585	N2	rnp-6	OK	1713.76	2366.94	0.465853	1.7415	0.0042	0.0306843	yes
WBGene00020167	T02G5.11	II:7078764-7081718	N2	rnp-6	OK	1.24965	4.88099	1.96565	3.05256	5e-05	0.000725861	yes
WBGene00017131	E04F6.15	II:7208800-7210272	N2	rnp-6	OK	2.33233	1.1369	-1.03666	-2.05085	0.0009	0.00897191	yes	GO:0055114; GO:0016491	oxidation-reduction process; oxidoreductase activity	protein_coding
WBGene00017127	E04F6.8	II:7210746-7211466	N2	rnp-6	OK	87.4323	60.6981	-0.526514	-2.0998	0.00015	0.00195025	yes			protein_coding
WBGene00017022	D1022.3,D1022.4	II:7455075-7457330	N2	rnp-6	OK	12.5925	8.29685	-0.601933	-1.99	0.00085	0.00858204	yes	GO:0016787	hydrolase activity	protein_coding
WBGene00017023	D1022.3,D1022.4	II:7455075-7457330	N2	rnp-6	OK	12.5925	8.29685	-0.601933	-1.99	0.00085	0.00858204	yes	GO:0016787	hydrolase activity	protein_coding
WBGene00006956	wrt-10	II:7533299-7534514	N2	rnp-6	OK	20.8669	10.7408	-0.958109	-3.50508	5e-05	0.000725861	yes			protein_coding
WBGene00015063	B0228.6	II:7754146-7755156	N2	rnp-6	OK	13.4742	6.68403	-1.01141	-3.18396	5e-05	0.000725861	yes	GO:0016021; GO:0016020	integral component of membrane; membrane	protein_coding
WBGene00003813	nrf-6	II:8028953-8032708	N2	rnp-6	OK	35.2974	22.5461	-0.646686	-3.15011	5e-05	0.000725861	yes	GO:0006810; GO:0006869; GO:0016021; GO:0016020; GO:0008289; GO:0016747; GO:0007275	lipid binding; membrane; lipid transport; transferase activity, transferring acyl groups other than amino-acyl groups; multicellular organism development; integral component of membrane; transport	protein_coding
WBGene00003089	ltd-1	II:8088493-8092754	N2	rnp-6	OK	2.87907	1.49938	-0.94124	-2.73099	5e-05	0.000725861	yes	GO:0005737; ; GO:0055120; GO:0003674; GO:0008270; GO:0005911; GO:0061061; GO:0046872	; cell-cell junction; cytoplasm; molecular_function; striated muscle dense body; zinc ion binding; metal ion binding; muscle structure development	protein_coding
WBGene00008050	C41C4.1	II:8105613-8106967	N2	rnp-6	OK	0.565682	1.18015	1.06091	1.74138	0.00445	0.0321073	yes	GO:0005794; GO:0005975; GO:0030206; GO:0016021; GO:0016020; GO:0008146; GO:0000139; GO:0016740; GO:1902884; GO:0047756	sulfotransferase activity; positive regulation of response to oxidative stress; chondroitin sulfate biosynthetic process; Golgi apparatus; transferase activity; carbohydrate metabolic process; Golgi membrane; chondroitin 4-sulfotransferase activity; membrane; integral component of membrane	protein_coding
WBGene00000653	col-77	II:8358227-8359378	N2	rnp-6	OK	0.200268	2.12716	3.40892	3.98109	0.0001	0.00135972	yes	GO:0016021; GO:0016020; GO:0005581; GO:0042302	structural constituent of cuticle; collagen trimer; integral component of membrane; membrane	protein_coding
WBGene00009898	dod-23	II:8398159-8399160	N2	rnp-6	OK	172.482	114.656	-0.58914	-2.92455	5e-05	0.000725861	yes			protein_coding
WBGene00000240	pah-1	II:8762667-8766922	N2	rnp-6	OK	46.2343	36.3773	-0.345925	-1.64894	0.00325	0.0250162	yes	GO:0040002; GO:0004510; GO:0004497; GO:0005515; GO:0042438; GO:0006559; GO:0016714; GO:0006571; GO:0004505; GO:0006569; GO:0006979; GO:0009072; GO:0008152; GO:0008340; GO:0005506; GO:0046872; GO:0016597; GO:0000003; GO:0055114; GO:0016491	tryptophan 5-monooxygenase activity; collagen and cuticulin-based cuticle development; response to oxidative stress; tryptophan catabolic process; protein binding; oxidoreductase activity; melanin biosynthetic process; iron ion binding; metabolic process; oxidoreductase activity, acting on paired donors, with incorporation or reduction of molecular oxygen, reduced pteridine as one donor, and inco…	protein_coding
WBGene00009785	F46C5.10	II:8817593-8818386	N2	rnp-6	OK	26.5809	18.142	-0.551052	-1.86827	0.0014	0.0128195	yes			protein_coding
WBGene00007178	B0457.2	II:8924571-8926675	N2	rnp-6	OK	8.83571	6.18873	-0.513704	-1.66949	0.00515	0.0358984	yes			protein_coding
WBGene00007690	sftd-3	II:8955236-8964149	N2	rnp-6	OK	31.502	22.0053	-0.517588	-1.73961	0.00225	0.0187814	yes	GO:0015031; GO:0016021; GO:0016020; GO:0016192; GO:0006810	vesicle-mediated transport; protein transport; integral component of membrane; transport; membrane	protein_coding
WBGene00007687	C18E9.7	II:8978579-8982678	N2	rnp-6	OK	0.217843	0.432789	0.990371	1.6659	0.0054	0.0372683	yes	GO:0005515	protein binding	protein_coding
WBGene00011977	T24B8.3	II:9059383-9061138	N2	rnp-6	OK	178.727	125.494	-0.51014	-2.45601	5e-05	0.000725861	yes			protein_coding
WBGene00167037	T24B8.3	II:9059383-9061138	N2	rnp-6	OK	178.727	125.494	-0.51014	-2.45601	5e-05	0.000725861	yes
WBGene00011978	T24B8.4	II:9063686-9070840	N2	rnp-6	OK	3.93566	6.0853	0.628723	1.33955	0.0048	0.0339756	yes	GO:0003779;	; actin binding	protein_coding
WBGene00000170	aqp-2	II:9258912-9261994	N2	rnp-6	OK	56.8083	37.9987	-0.580154	-2.68862	5e-05	0.000725861	yes	GO:0006810; GO:0005215; GO:0016021; GO:0016020; GO:0015250; GO:0006833	transporter activity; water transport; water channel activity; membrane; integral component of membrane; transport	protein_coding
WBGene00044807	T19H5.6	II:9469025-9470082	N2	rnp-6	OK	2.50351	0.291384	-3.10296	-3.88971	5e-05	0.000725861	yes	GO:0005737; GO:0005975; GO:0016021; GO:0016020; GO:0005576; GO:0008061; GO:0004553; GO:0004568; GO:0006032	hydrolase activity, hydrolyzing O-glycosyl compounds; extracellular region; cytoplasm; carbohydrate metabolic process; chitin catabolic process; membrane; chitinase activity; chitin binding; integral component of membrane	protein_coding
WBGene00006938	wee-1.1	II:9581964-9583548	N2	rnp-6	OK	0.778475	1.45555	0.902846	1.78931	0.0028	0.0222533	yes	GO:0006468; GO:0030154; GO:0009790; GO:0016310; GO:0005634; GO:0016301; GO:0007049; GO:0018108; GO:0000166; GO:0004674; GO:0016740; GO:0004713; GO:0051301; GO:0004672; GO:0046872; GO:0007275; GO:0005524	protein phosphorylation; cell division; transferase activity; peptidyl-tyrosine phosphorylation; phosphorylation; cell differentiation; protein kinase activity; kinase activity; protein tyrosine kinase activity; nucleus; ATP binding; embryo development; cell cycle; protein serine/threonine kinase activity; nucleotide binding; multicellular organism development; metal ion binding	protein_coding
WBGene00009450	ugt-58	II:9584378-9586784	N2	rnp-6	OK	35.5802	27.4104	-0.37635	-1.77233	0.00155	0.013881	yes	GO:0016757; GO:0016021; GO:0016020; GO:0043231; GO:0016740; GO:0008152; GO:0016758; GO:0015020; GO:0055114; GO:0016491	transferase activity, transferring glycosyl groups; transferase activity; glucuronosyltransferase activity; oxidoreductase activity; transferase activity, transferring hexosyl groups; metabolic process; oxidation-reduction process; membrane; intracellular membrane-bounded organelle; integral component of membrane	protein_coding
WBGene00014254	cyp-13A10	II:9660838-9662946	N2	rnp-6	OK	1.87351	3.33663	0.832648	2.3483	0.00015	0.00195025	yes	GO:0004497; GO:0016705; GO:0020037; GO:0016021; GO:0016020; GO:0005575; GO:0005506; GO:0046872; GO:0055114; GO:0016491	cellular_component; oxidoreductase activity; monooxygenase activity; oxidoreductase activity, acting on paired donors, with incorporation or reduction of molecular oxygen; metal ion binding; membrane; heme binding; iron ion binding; integral component of membrane; oxidation-reduction process	protein_coding
WBGene00013145	cutl-2	II:9721763-9724526	N2	rnp-6	OK	3.64008	1.94363	-0.905218	-2.25065	0.0005	0.00551085	yes			protein_coding
WBGene00014159	arrd-4	II:9837088-9838302	N2	rnp-6	OK	5.02129	3.21121	-0.64494	-1.76478	0.00255	0.0206975	yes			protein_coding
WBGene00003773	nlt-1	II:9991159-10001142	N2	rnp-6	OK	190.449	132.508	-0.52332	-2.30583	5e-05	0.000725861	yes	GO:0006810; GO:0005777; GO:0008289	lipid binding; transport; peroxisome	protein_coding
WBGene00002497	let-268	II:10033306-10039940	N2	rnp-6	OK	5.68805	4.09961	-0.47245	-1.68637	0.0035	0.0265526	yes	GO:0031418; GO:0016705; GO:0005783; GO:0006486; GO:0016020; GO:0030867; GO:0051213; GO:0032964; GO:0003980; GO:0097359; GO:0005506; GO:0046872; GO:0008475; GO:0055114; GO:0016491	protein glycosylation; procollagen-lysine 5-dioxygenase activity; collagen biosynthetic process; UDP-glucose:glycoprotein glucosyltransferase activity; oxidoreductase activity; endoplasmic reticulum; iron ion binding; oxidoreductase activity, acting on paired donors, with incorporation or reduction of molecular oxygen; UDP-glucosylation; rough endoplasmic reticulum membrane; oxidation-reduction p…	protein_coding
WBGene00006651	tts-2	II:10201124-10202230	N2	rnp-6	OK	1.25058	0.509124	-1.29651	-1.77673	0.0072	0.0464409	yes
WBGene00014047	clec-61	II:10488727-10490514	N2	rnp-6	OK	0.0799991	0.553283	2.78996	2.07426	0.00535	0.0369777	yes	GO:0050830; GO:0030246	defense response to Gram-positive bacterium; carbohydrate binding	protein_coding
WBGene00014667	C06A1.4	II:10574841-10578193	N2	rnp-6	OK	71.6706	90.2883	0.333159	1.76608	0.00255	0.0206975	yes
WBGene00010898	nphp-1	II:10648937-10652256	N2	rnp-6	OK	0.63384	0.304806	-1.05622	-1.72452	0.0061	0.040891	yes	GO:0035869; GO:0008104; GO:0036064; GO:0030030; GO:0023041; GO:0007610; GO:0097730; GO:0034607; GO:0003674; GO:0097546; GO:0005515; GO:0034606; GO:1905515; GO:0008340	non-motile cilium; turning behavior involved in mating; ciliary transition zone; protein localization; behavior; ciliary base; protein binding; ciliary basal body; molecular_function; non-motile cilium assembly; determination of adult lifespan; neuronal signal transduction; response to hermaphrodite contact; cell projection organization	protein_coding
WBGene00002297	ect-2	II:10778394-10783289	N2	rnp-6	OK	50.8621	62.1697	0.289621	1.52806	0.0078	0.0492264	yes	GO:0005737; GO:0005089; GO:0000902; GO:0043547; GO:0045167; GO:0005085; GO:0005634; GO:0032970; GO:0005096; GO:0000281; GO:0045666; GO:0005938; GO:0005515; GO:0035023; GO:0000910; GO:0032880	regulation of actin filament-based process; asymmetric protein localization involved in cell fate determination; positive regulation of neuron differentiation; cytoplasm; cell cortex; guanyl-nucleotide exchange factor activity; positive regulation of GTPase activity; mitotic cytokinesis; nucleus; GTPase activator activity; protein binding; regulation of protein localization; cytokinesis; Rho guan…	protein_coding
WBGene00000657	col-81	II:11012394-11013779	N2	rnp-6	OK	21.5005	32.2942	0.586904	2.38968	5e-05	0.000725861	yes	GO:0016021; GO:0016020; GO:0005581; GO:0042302	structural constituent of cuticle; collagen trimer; integral component of membrane; membrane	protein_coding
WBGene00004227	ptr-13	II:11157290-11162331	N2	rnp-6	OK	6.60288	9.21905	0.481523	1.95279	0.0008	0.00816818	yes	GO:0016021; GO:0016020; GO:0018996	molting cycle, collagen and cuticulin-based cuticle; integral component of membrane; membrane	protein_coding
WBGene00007041	tag-180	II:11323048-11329429	N2	rnp-6	OK	0.909416	1.54165	0.761467	2.11339	0.00045	0.00504819	yes			protein_coding
WBGene00007143	B0334.3	II:11488286-11493021	N2	rnp-6	OK	101.345	66.845	-0.600378	-3.1211	5e-05	0.000725861	yes	GO:0003824; GO:0000287; GO:0030976	thiamine pyrophosphate binding; catalytic activity; magnesium ion binding	protein_coding
WBGene00007028	trr-1	II:11661579-11675927	N2	rnp-6	OK	57.4991	70.3368	0.290742	1.53478	0.00775	0.0489842	yes	GO:0040010; GO:0016301; GO:0016573; GO:0000123; GO:0006281; GO:0016310; GO:0005634; GO:0030154; GO:0000793; GO:0007283; GO:0040027; GO:0005488; GO:0005515; GO:0005694; GO:0007275; GO:0000003	positive regulation of growth rate; protein binding; histone acetyltransferase complex; binding; phosphorylation; cell differentiation; histone acetylation; kinase activity; nucleus; negative regulation of vulval development; reproduction; DNA repair; multicellular organism development; spermatogenesis; chromosome; condensed chromosome	protein_coding
WBGene00009691	F44E5.4	II:11757105-11759311	N2	rnp-6	OK	1.38558	0.435275	-1.67049	-3.25433	5e-05	0.000725861	yes	GO:0005524; GO:0000166	nucleotide binding; ATP binding	protein_coding
WBGene00012221	W03C9.5	II:11967047-11967533	N2	rnp-6	OK	112.533	78.6874	-0.516147	-2.10977	0.0002	0.00250605	yes			protein_coding
WBGene00003154	mcm-2	II:12001509-12006625	N2	rnp-6	OK	89.0139	110.227	0.308372	1.63945	0.0038	0.0283741	yes	GO:0016787; GO:0042555; GO:0045120; GO:0005634; GO:0006270; GO:0000166; GO:0000793; GO:0006260; GO:0003677; GO:0003678; GO:0004386; GO:0032508; GO:0005524	pronucleus; DNA replication initiation; hydrolase activity; DNA replication; DNA binding; DNA helicase activity; MCM complex; nucleus; ATP binding; helicase activity; nucleotide binding; DNA duplex unwinding; condensed chromosome	protein_coding
WBGene00012462	Y17G7B.8	II:12009076-12027746	N2	rnp-6	OK	17.7194	11.1361	-0.670096	-1.61484	0.00495	0.0348181	yes	GO:0045087; GO:0005515	innate immune response; protein binding	protein_coding
WBGene00012464	arrd-7	II:12060227-12062619	N2	rnp-6	OK	4.08001	2.50948	-0.701183	-1.90499	0.00105	0.0101691	yes	GO:0005515	protein binding	protein_coding
WBGene00004167	pqn-87	II:12203308-12221788	N2	rnp-6	OK	85.0851	109.032	0.357767	1.91444	0.00115	0.01096	yes	; GO:0005515	; protein binding	protein_coding
WBGene00013284	daf-22	II:12423511-12425694	N2	rnp-6	OK	79.6698	61.3926	-0.375969	-1.86913	0.0007	0.00728567	yes	GO:0048639; GO:0043053; GO:0006637; GO:0042811; GO:0006869; GO:0033814; GO:0043054; GO:0006810; GO:0005777; GO:0008289; GO:1904070; GO:0003824; GO:0016740; GO:0050920; GO:0016747; GO:0008152; GO:0000038; GO:0061063; GO:0010888; GO:0019236; GO:0008355	acyl-CoA metabolic process; positive regulation of nematode larval development; dauer entry; lipid binding; ascaroside biosynthetic process; transferase activity; very long-chain fatty acid metabolic process; peroxisome; pheromone biosynthetic process; metabolic process; negative regulation of lipid storage; olfactory learning; response to pheromone; catalytic activity; lipid transport; transfera…	protein_coding
WBGene00012583	clec-4	II:12578417-12581068	N2	rnp-6	OK	0.905146	1.91855	1.08379	2.22949	0.00025	0.00303907	yes	GO:0030246	carbohydrate binding	protein_coding
WBGene00012604	nspe-2	II:12619172-12619388	N2	rnp-6	OK	14.7198	44.5005	1.59607	3.12734	5e-05	0.000725861	yes			protein_coding
WBGene00012591	nspe-1	II:12620547-12620885	N2	rnp-6	OK	19.9469	50.5309	1.341	4.04518	5e-05	0.000725861	yes			protein_coding
WBGene00012592	Y38E10A.14	II:12623188-12624506	N2	rnp-6	OK	11.7566	29.1189	1.30849	5.21604	5e-05	0.000725861	yes			protein_coding
WBGene00012896	snrp-200	II:12726958-12736875	N2	rnp-6	OK	27.6479	36.7529	0.410691	2.15342	0.0001	0.00135972	yes	GO:0016787; GO:0003676; GO:0005634; GO:0000398; GO:0000166; GO:0005681; GO:0005515; GO:0004386; GO:0008380; GO:0005524; GO:0006397	nucleic acid binding; hydrolase activity; protein binding; RNA splicing; mRNA processing; spliceosomal complex; nucleus; ATP binding; helicase activity; nucleotide binding; mRNA splicing, via spliceosome	protein_coding
WBGene00012897	pisy-1	II:12737030-12738334	N2	rnp-6	OK	86.1547	107.607	0.320768	1.58263	0.0065	0.0429476	yes	GO:0005794; GO:0006629; GO:0016780; GO:0008654; GO:0016021; GO:0016020; GO:0016740; GO:0003881; GO:0006661	phospholipid biosynthetic process; Golgi apparatus; phosphotransferase activity, for other substituted phosphate groups; transferase activity; phosphatidylinositol biosynthetic process; CDP-diacylglycerol-inositol 3-phosphatidyltransferase activity; lipid metabolic process; membrane; integral component of membrane	protein_coding
WBGene00012899	Y46G5A.7	II:12755157-12756195	N2	rnp-6	OK	9.91328	6.90718	-0.521266	-1.6366	0.0045	0.0323767	yes	GO:0005515	protein binding	protein_coding
WBGene00006315	sup-6	II:12938868-12948143	N2	rnp-6	OK	2811.84	3623.52	0.365881	1.58821	0.00565	0.0385456	yes
WBGene00012608	Y38F1A.6	II:12994357-12996571	N2	rnp-6	OK	56.2464	43.8308	-0.359817	-1.75959	0.00215	0.018108	yes	GO:0015993; GO:0005829; GO:0004022; GO:0047988; GO:0005739; GO:0046872; GO:0055114; GO:0016491	cytosol; molecular hydrogen transport; alcohol dehydrogenase (NAD) activity; oxidoreductase activity; metal ion binding; mitochondrion; hydroxyacid-oxoacid transhydrogenase activity; oxidation-reduction process	protein_coding
WBGene00000661	col-86,rict-1	II:13096008-13116801	N2	rnp-6	OK	23.3361	30.3326	0.378306	1.79391	0.0008	0.00816818	yes	GO:0016021; GO:0016020; GO:0005581; GO:0042302	structural constituent of cuticle; collagen trimer; integral component of membrane; membrane	protein_coding
WBGene00009245	col-86,rict-1	II:13096008-13116801	N2	rnp-6	OK	23.3361	30.3326	0.378306	1.79391	0.0008	0.00816818	yes	GO:0042325; GO:0031932; GO:0030950; GO:0031532; GO:0031929; GO:0005488; GO:0030010; GO:0032956; GO:0048382; GO:0051897; GO:0043085; GO:0008047	actin cytoskeleton reorganization; mesendoderm development; establishment or maintenance of actin cytoskeleton polarity; TOR signaling; binding; positive regulation of protein kinase B signaling; establishment of cell polarity; regulation of actin cytoskeleton organization; TORC2 complex; regulation of phosphorylation; positive regulation of catalytic activity; enzyme activator activity	protein_coding
WBGene00009741	drr-1	II:13495048-13495896	N2	rnp-6	OK	18.6398	13.4941	-0.466055	-1.56701	0.00545	0.0375212	yes	GO:0016021; GO:0016020	integral component of membrane; membrane	protein_coding
WBGene00013008	clec-146	II:13590558-13593797	N2	rnp-6	OK	25.6795	13.1838	-0.961847	-3.23851	5e-05	0.000725861	yes	GO:0030246	carbohydrate binding	protein_coding
WBGene00001772	gst-24	II:13610442-13611342	N2	rnp-6	OK	2.6724	40.0226	3.90461	10.5891	5e-05	0.000725861	yes	GO:0016740; GO:0045087; GO:0005515	transferase activity; protein binding; innate immune response	protein_coding
WBGene00001763	gst-15	II:13611770-13613152	N2	rnp-6	OK	1.9637	4.27507	1.12237	2.34511	0.00035	0.00407043	yes	GO:0016740; GO:0005515	transferase activity; protein binding	protein_coding
WBGene00001764	gst-16	II:13622964-13624433	N2	rnp-6	OK	4.4107	2.67593	-0.720967	-1.58296	0.0074	0.0473757	yes	GO:0016740; GO:0005515	transferase activity; protein binding	protein_coding
WBGene00008577	F08G2.5	II:13832852-13833631	N2	rnp-6	OK	8.70771	16.8028	0.948337	3.07947	5e-05	0.000725861	yes	GO:0045087; GO:0005515	innate immune response; protein binding	protein_coding
WBGene00012726	Y39G8B.5	II:13987615-13991838	N2	rnp-6	OK	0.247141	0.637742	1.36764	2.21243	0.00045	0.00504819	yes	GO:0018107; GO:0006468; GO:0018105; GO:0004674; GO:0004672; GO:0005524	protein phosphorylation; peptidyl-serine phosphorylation; protein kinase activity; ATP binding; protein serine/threonine kinase activity; peptidyl-threonine phosphorylation	protein_coding
WBGene00008495	F01D5.5	II:14001685-14002300	N2	rnp-6	OK	7.94024	13.5112	0.766895	2.16246	0.00015	0.00195025	yes	GO:0045087	innate immune response	protein_coding
WBGene00010722	K09E4.4	II:14114211-14122165	N2	rnp-6	OK	0.788271	1.32005	0.743831	1.74088	0.0031	0.0241392	yes			protein_coding
WBGene00235256	Y54G11A.19	II:14256577-14256997	N2	rnp-6	OK	9.2921	13.9661	0.587849	1.5106	0.00775	0.0489842	yes	GO:0016021; GO:0016020	integral component of membrane; membrane	protein_coding
WBGene00000830	ctl-1	II:14303611-14306293	N2	rnp-6	OK	8.10223	11.7237	0.533033	2.0145	0.0007	0.00728567	yes	GO:0005737; GO:0020037; GO:0042542; GO:0005777; GO:0005739; GO:0006979; GO:0098869; GO:0042744; GO:0004096; GO:0046872; GO:0004601; GO:0055114; GO:0016491	catalase activity; hydrogen peroxide catabolic process; cytoplasm; cellular oxidant detoxification; oxidoreductase activity; response to hydrogen peroxide; mitochondrion; metal ion binding; peroxisome; heme binding; response to oxidative stress; peroxidase activity; oxidation-reduction process	protein_coding
WBGene00004048	plx-2	II:14417887-14424891	N2	rnp-6	OK	1.38082	0.818061	-0.755245	-2.28712	0.0001	0.00135972	yes	GO:0045138; GO:0008360; GO:0016020; GO:0043087; GO:0002119; GO:0017154; GO:0016021; GO:0030154; GO:0050772; GO:0031252; GO:0007162; GO:0009792; GO:0071526; GO:0007165; GO:0005515; GO:0005886; GO:0007413; GO:0009986; GO:0007275	nematode larval development; embryo development ending in birth or egg hatching; positive regulation of axonogenesis; protein binding; regulation of cell shape; signal transduction; cell differentiation; cell leading edge; regulation of GTPase activity; axonal fasciculation; nematode male tail tip morphogenesis; semaphorin-plexin signaling pathway; membrane; cell surface; multicellular organism d…	protein_coding
WBGene00010550	K04B12.2	II:14434451-14438977	N2	rnp-6	OK	15.0514	11.1392	-0.434257	-1.78889	0.00185	0.016033	yes			protein_coding
WBGene00007313	clec-147	II:14535446-14537579	N2	rnp-6	OK	3.27483	1.50566	-1.12103	-2.26289	0.00045	0.00504819	yes	GO:0030246	carbohydrate binding	protein_coding
WBGene00007244	C01G12.3	II:14581464-14582360	N2	rnp-6	OK	4.27762	2.13115	-1.00517	-2.09195	0.0009	0.00897191	yes			protein_coding
WBGene00006787	unc-52	II:14647326-14666943	N2	rnp-6	OK	5.20981	7.45037	0.516082	1.58179	0.00595	0.0401087	yes	GO:0040011; GO:0007517; GO:0005604; GO:0040017; GO:1905905; GO:0048644; GO:0031581; GO:0002119; GO:0060279; GO:0005198; GO:0009792; GO:0003674; GO:0005509; GO:0005515; GO:0060465; GO:0055120; GO:0030239; GO:0016477; GO:0008543; GO:0005578; GO:0005576	calcium ion binding; muscle organ morphogenesis; fibroblast growth factor receptor signaling pathway; embryo development ending in birth or egg hatching; cell migration; extracellular region; protein binding; molecular_function; striated muscle dense body; muscle organ development; structural molecule activity; hemidesmosome assembly; pharyngeal gland morphogenesis; myofibril assembly; basement m…	protein_coding
WBGene00044728	Y53F4B.45	II:15037988-15048907	N2	rnp-6	OK	127.709	81.9025	-0.640886	-2.43829	5e-05	0.000725861	yes
WBGene00001776	gst-28	II:15166194-15167406	N2	rnp-6	OK	13.4483	7.22818	-0.895716	-2.66624	5e-05	0.000725861	yes	GO:0016740; GO:0005515	transferase activity; protein binding	protein_coding
WBGene00016219	C29F9.4	III:120491-124686	N2	rnp-6	OK	22.2006	10.6063	-1.06568	-3.84779	5e-05	0.000725861	yes			protein_coding
WBGene00016218	C29F9.3	III:124777-126419	N2	rnp-6	OK	20.8124	10.4611	-0.992403	-3.26771	5e-05	0.000725861	yes	; GO:0045087	; innate immune response	protein_coding
WBGene00016217	C29F9.2	III:130946-131754	N2	rnp-6	OK	4.95434	2.65618	-0.899339	-1.74193	0.0052	0.0361513	yes			protein_coding
WBGene00006894	ver-1	III:156823-163542	N2	rnp-6	OK	0.272634	0.522476	0.938399	1.77895	0.00295	0.0231897	yes	GO:0045138; GO:0006468; GO:0005515; GO:0016021; GO:0016020; GO:0000166; GO:0005886; GO:0004672; GO:0005524	protein phosphorylation; protein binding; protein kinase activity; nematode male tail tip morphogenesis; ATP binding; membrane; nucleotide binding; integral component of membrane; plasma membrane	protein_coding
WBGene00021909	Y55B1BL.1	III:402423-405614	N2	rnp-6	OK	14.109	22.2142	0.654862	2.03116	0.00025	0.00303907	yes			protein_coding
WBGene00000882	cyn-6	III:773402-774160	N2	rnp-6	OK	57.2256	42.7882	-0.41945	-1.80286	0.002	0.017068	yes	GO:0000413; GO:0006457; GO:0016853; GO:0003755	protein peptidyl-prolyl isomerization; isomerase activity; protein folding; peptidyl-prolyl cis-trans isomerase activity	protein_coding
WBGene00000895	dac-1	III:816245-821729	N2	rnp-6	OK	0.380563	0.840779	1.14359	1.59053	0.0036	0.0271525	yes	; GO:0051123; GO:0001075; GO:0005634; GO:0006355; GO:0005667; GO:0007275	; RNA polymerase II transcriptional preinitiation complex assembly; regulation of transcription, DNA-templated; transcription factor activity, RNA polymerase II core promoter sequence-specific binding involved in preinitiation complex assembly; nucleus; transcription factor complex; multicellular organism development	protein_coding
WBGene00019328	clec-149	III:823221-826412	N2	rnp-6	OK	4.17246	2.33297	-0.838731	-2.02473	0.0011	0.0105816	yes	GO:0030246	carbohydrate binding	protein_coding
WBGene00006615	trp-2	III:991880-1001907	N2	rnp-6	OK	0.790617	1.59332	1.01098	2.55339	5e-05	0.000725861	yes	GO:0015279; GO:0006810; GO:0005887; GO:0005262; GO:0051480; GO:0070588; GO:0006811; GO:0016020; GO:0005216; GO:0055085; GO:0005515; GO:0006828; GO:0016021	regulation of cytosolic calcium ion concentration; manganese ion transport; calcium channel activity; integral component of plasma membrane; protein binding; store-operated calcium channel activity; ion channel activity; integral component of membrane; ion transport; calcium ion transmembrane transport; membrane; transmembrane transport; transport	protein_coding
WBGene00019914	clec-150	III:1002706-1006247	N2	rnp-6	OK	193.391	48.0635	-2.00851	-9.89174	5e-05	0.000725861	yes	GO:0030246	carbohydrate binding	protein_coding
WBGene00019030	exc-6	III:1103223-1116374	N2	rnp-6	OK	0.764371	1.29402	0.759519	1.72055	0.00315	0.0244316	yes	GO:0005856; GO:0005737; GO:0031941; GO:0031113; GO:0035150; GO:1904531; GO:0003779; GO:0005515; GO:0060562; GO:0005874; GO:0002064	epithelial cell development; regulation of microtubule polymerization; actin binding; microtubule; cytoplasm; regulation of tube size; filamentous actin; protein binding; cytoskeleton; epithelial tube morphogenesis; positive regulation of actin filament binding	protein_coding
WBGene00022104	Y71D11A.3	III:1116462-1142921	N2	rnp-6	OK	4.39413	1.75585	-1.32341	-3.12952	5e-05	0.000725861	yes	GO:0016787; GO:0016829; GO:0016831; GO:0006568; GO:0001760; GO:1904985; GO:1904984; GO:0046872; GO:0005829	carboxy-lyase activity; lyase activity; hydrolase activity; tryptophan metabolic process; cytosol; metal ion binding; regulation of quinolinate biosynthetic process; negative regulation of quinolinate biosynthetic process; aminocarboxymuconate-semialdehyde decarboxylase activity	protein_coding
WBGene00004891	smr-1	III:1143061-1145220	N2	rnp-6	OK	89.3931	111.232	0.315339	1.5339	0.0073	0.0469136	yes			protein_coding
WBGene00022497	Y119D3B.21	III:1214951-1215287	N2	rnp-6	OK	792.562	1071.24	0.434692	2.27957	0.0001	0.00135972	yes			protein_coding
WBGene00219771	linc-24	III:1370494-1371568	N2	rnp-6	OK	1.93713	0.535724	-1.85436	-2.06797	0.00415	0.0303769	yes
WBGene00022334	Y82E9BR.1	III:1458535-1466732	N2	rnp-6	OK	3.63331	2.35589	-0.625015	-1.83186	0.0029	0.0228734	yes	GO:0003676	nucleic acid binding	protein_coding
WBGene00019715	M01G5.1	III:1496398-1508554	N2	rnp-6	OK	37.537	49.8544	0.409407	2.10005	0.00035	0.00407043	yes			protein_coding
WBGene00021256	Y22D7AR.2	III:1705945-1713729	N2	rnp-6	OK	0.525692	1.48888	1.50194	4.05562	5e-05	0.000725861	yes	GO:0016021; GO:0016020; GO:0005515	protein binding; integral component of membrane; membrane	protein_coding
WBGene00021443	Y39A3CL.7	III:1824918-1833952	N2	rnp-6	OK	37.7182	48.0291	0.348648	1.64907	0.0041	0.0300971	yes			protein_coding
WBGene00004128	pqn-41	III:1905966-1943628	N2	rnp-6	OK	19.9544	25.2438	0.33922	1.53892	0.0076	0.0482968	yes	; GO:0005737	; cytoplasm	protein_coding
WBGene00023289	pqn-41	III:1905966-1943628	N2	rnp-6	OK	19.9544	25.2438	0.33922	1.53892	0.0076	0.0482968	yes
WBGene00021703	cpt-3	III:2082818-2088272	N2	rnp-6	OK	30.922	44.5402	0.526473	2.60581	5e-05	0.000725861	yes	GO:0016021; GO:0016020; GO:0016746; GO:0016740	transferase activity; transferase activity, transferring acyl groups; integral component of membrane; membrane	protein_coding
WBGene00016520	C39B5.2	III:2233887-2236986	N2	rnp-6	OK	33.914	22.7221	-0.577788	-2.51434	5e-05	0.000725861	yes	GO:0005515	protein binding	protein_coding
WBGene00021019	W04B5.2	III:2424354-2427738	N2	rnp-6	OK	3.48096	1.6838	-1.04777	-2.61049	0.0001	0.00135972	yes	GO:0016021; GO:0016020	integral component of membrane; membrane	protein_coding
WBGene00022191	Y71H2B.1	III:2629010-2631359	N2	rnp-6	OK	10.352	6.42878	-0.687291	-1.7418	0.0032	0.0247374	yes	GO:0000062	fatty-acyl-CoA binding	protein_coding
WBGene00019212	H19M22.3	III:2636404-2642848	N2	rnp-6	OK	0.725952	0.277221	-1.38884	-1.73057	0.00325	0.0250162	yes	; GO:0042395; GO:2000243; GO:0031012; GO:0002164; GO:0010628; GO:0008270; GO:0050829; GO:0008233; GO:0008237; GO:0006508; GO:0046872; GO:1903427; GO:0016787; GO:0004222; GO:1902479; GO:0010286; GO:0042308; GO:0008340; GO:1904807; GO:1904109; GO:0040017; GO:1900036; GO:0005576; GO:1904000; GO:0005578	; metalloendopeptidase activity; hydrolase activity; zinc ion binding; proteolysis; positive regulation of cholesterol import; extracellular matrix; heat acclimation; larval development; negative regulation of protein oxidation; metal ion binding; extracellular region; negative regulation of protein import into nucleus; positive regulation of defense response to bacterium, incompatible interactio…	protein_coding
WBGene00021817	Y53G8B.1	III:3129318-3131254	N2	rnp-6	OK	4.45714	2.63924	-0.755998	-1.70592	0.00405	0.0298522	yes	GO:0005737; GO:0003824; GO:0009072; GO:0005515	aromatic amino acid family metabolic process; cytoplasm; protein binding; catalytic activity	protein_coding
WBGene00007964	cyp-25A2	III:3835220-3837150	N2	rnp-6	OK	8.97405	13.6393	0.603942	2.3291	5e-05	0.000725861	yes	GO:0004497; GO:0020037; GO:0016705; GO:0005506; GO:0046872; GO:0055114; GO:0016491	oxidoreductase activity; iron ion binding; oxidoreductase activity, acting on paired donors, with incorporation or reduction of molecular oxygen; metal ion binding; heme binding; monooxygenase activity; oxidation-reduction process	protein_coding
WBGene00007966	maph-1.3	III:3844892-3848262	N2	rnp-6	OK	30.3868	39.3131	0.371564	1.86888	0.001	0.0097769	yes			protein_coding
WBGene00014203	ZK1058.3	III:3918870-3921706	N2	rnp-6	OK	18.4111	11.6718	-0.657547	-1.78909	0.0025	0.0203879	yes	GO:0016779; GO:0005975; GO:0006012; GO:0033499; GO:0008108; GO:0003824; GO:0016740; GO:0008270; GO:0046872	galactose catabolic process via UDP-galactose; galactose metabolic process; transferase activity; carbohydrate metabolic process; zinc ion binding; nucleotidyltransferase activity; metal ion binding; catalytic activity; UDP-glucose:hexose-1-phosphate uridylyltransferase activity	protein_coding
WBGene00011198	R10E4.1	III:4269761-4272506	N2	rnp-6	OK	33.9026	26.4798	-0.356503	-1.61243	0.00485	0.0342461	yes	; GO:0005515	; protein binding	protein_coding
WBGene00009442	F35G12.5	III:4584582-4587315	N2	rnp-6	OK	26.2665	19.3484	-0.441007	-1.64415	0.00495	0.0348181	yes			protein_coding
WBGene00007170	B0393.5	III:4765832-4778065	N2	rnp-6	OK	1.75136	0.502831	-1.80033	-4.43744	5e-05	0.000725861	yes	GO:0007160; GO:0016021; GO:0016020; GO:0005509; GO:0005515	calcium ion binding; protein binding; cell-matrix adhesion; integral component of membrane; membrane	protein_coding
WBGene00016440	gipc-1	III:4870777-4872049	N2	rnp-6	OK	1.34269	2.23794	0.73704	1.56264	0.0066	0.0434415	yes	GO:0031982; GO:0005515	protein binding; vesicle	protein_coding
WBGene00020094	wip-1	III:5018647-5021108	N2	rnp-6	OK	26.1951	33.4453	0.352505	1.59519	0.00635	0.042158	yes	GO:0003779; GO:0010172; GO:0005519; GO:0030334; GO:0031647	cytoskeletal regulatory protein binding; regulation of protein stability; embryonic body morphogenesis; regulation of cell migration; actin binding	protein_coding
WBGene00001076	dpy-17	III:5107329-5108589	N2	rnp-6	OK	94.5964	37.8334	-1.32213	-6.14977	5e-05	0.000725861	yes	GO:0042302; GO:0042338	structural constituent of cuticle; cuticle development involved in collagen and cuticulin-based cuticle molting cycle	protein_coding
WBGene00004095	pqe-1	III:5311245-5321732	N2	rnp-6	OK	78.8779	103.084	0.38613	1.86015	0.00115	0.01096	yes	; GO:0016787; GO:0004518; GO:0005634; GO:0090305; GO:0010629; GO:0003676; GO:0004527	; nucleic acid binding; hydrolase activity; nucleic acid phosphodiester bond hydrolysis; nucleus; nuclease activity; negative regulation of gene expression; exonuclease activity	protein_coding
WBGene00003055	lon-1	III:5474477-5478382	N2	rnp-6	OK	17.5969	27.4982	0.644014	2.6937	5e-05	0.000725861	yes	GO:0040010; GO:0040015; GO:0005515; GO:0005576; GO:0005913; GO:0005887; GO:0032876; GO:0000003	positive regulation of growth rate; cell-cell adherens junction; negative regulation of DNA endoreduplication; extracellular region; protein binding; negative regulation of multicellular organism growth; integral component of plasma membrane; reproduction	protein_coding
WBGene00019832	osg-1	III:5487641-5498952	N2	rnp-6	OK	2.15571	1.11478	-0.951404	-2.19023	0.00015	0.00195025	yes	GO:0005089; GO:0043547; GO:0005085; GO:0005622; GO:0005515; GO:0035023; GO:0035556; GO:0006979	intracellular signal transduction; protein binding; intracellular; guanyl-nucleotide exchange factor activity; positive regulation of GTPase activity; response to oxidative stress; Rho guanyl-nucleotide exchange factor activity; regulation of Rho protein signal transduction	protein_coding
WBGene00017028	dex-1	III:5526070-5535481	N2	rnp-6	OK	2.98981	2.05553	-0.540543	-1.80166	0.0021	0.0177668	yes	GO:0007160; GO:0005509; GO:0005515	calcium ion binding; protein binding; cell-matrix adhesion	protein_coding
WBGene00003371	mlc-3	III:5565024-5567384	N2	rnp-6	OK	228.593	317.14	0.472334	2.35196	5e-05	0.000725861	yes	GO:0016459; GO:0005863; GO:0005509	calcium ion binding; striated muscle myosin thick filament; myosin complex	protein_coding
WBGene00018965	F56D2.3	III:5584686-5587049	N2	rnp-6	OK	1.22042	0.529607	-1.20438	-2.15414	0.00085	0.00858204	yes			protein_coding
WBGene00000900	daf-4	III:5625013-5632319	N2	rnp-6	OK	11.2269	14.7067	0.389514	1.54801	0.00655	0.043217	yes	GO:0022604; GO:0043053; GO:0016310; GO:0030509; GO:0004872; GO:0061065; GO:0007275; GO:0023014; GO:0040024; GO:0016021; GO:0016020; GO:0036122; GO:0000166; GO:0004675; GO:0004674; GO:0016740; GO:0061067; GO:0004672; GO:0046872; GO:0005524; GO:0006468; GO:0045087; GO:0016301; GO:0050832; GO:0005886; GO:0008340; GO:0030514; GO:0030513; GO:0007179; GO:0007178; GO:0043235; GO:0030536; GO:0018991; GO:…	positive regulation of multicellular organism growth; dauer entry; negative regulation of BMP signaling pathway; regulation of cell morphogenesis; regulation of eating behavior; receptor activity; nucleotide binding; transforming growth factor beta receptor signaling pathway; plasma membrane; innate immune response; defense response to fungus; protein binding; protein kinase activity; kinase acti…	protein_coding
WBGene00015081	B0244.6	III:5738007-5741554	N2	rnp-6	OK	1.05926	2.00602	0.921282	2.08935	0.0008	0.00816818	yes	GO:0004930; GO:0016021; GO:0016020; GO:0007165; GO:0004871; GO:0005886; GO:0007186	signal transduction; signal transducer activity; G-protein coupled receptor activity; membrane; G-protein coupled receptor signaling pathway; integral component of membrane; plasma membrane	protein_coding
WBGene00017158	hpo-10	III:5879488-5882923	N2	rnp-6	OK	36.0786	48.1198	0.415485	1.64697	0.0043	0.0312605	yes			protein_coding
WBGene00044455	F23F12.13	III:6495676-6498177	N2	rnp-6	OK	1.90492	1.072	-0.829421	-1.87266	0.0031	0.0241392	yes	GO:0022891; GO:0016021; GO:0016020; GO:0022857; GO:0005887; GO:0055085	integral component of plasma membrane; substrate-specific transmembrane transporter activity; integral component of membrane; transmembrane transporter activity; membrane; transmembrane transport	protein_coding
WBGene00017756	F23F12.12	III:6508131-6509502	N2	rnp-6	OK	13.4312	9.52502	-0.495793	-1.6966	0.00355	0.0268498	yes			protein_coding
WBGene00000998	dig-1	III:6746307-6794764	N2	rnp-6	OK	3.30791	4.68502	0.502134	2.6039	5e-05	0.000725861	yes	GO:0007399; GO:0008406; GO:0005578; GO:0003824; GO:0005576; GO:0005509; GO:0005515; GO:0007155; GO:0007275	calcium ion binding; extracellular region; catalytic activity; gonad development; protein binding; cell adhesion; proteinaceous extracellular matrix; nervous system development; multicellular organism development	protein_coding
WBGene00020315	T07E3.4	III:6898015-6903106	N2	rnp-6	OK	16.3394	24.8591	0.605417	1.92047	0.001	0.0097769	yes	GO:0005515	protein binding	protein_coding
WBGene00000762	coq-2	III:6935966-6939444	N2	rnp-6	OK	32.6086	25.3941	-0.360759	-1.58184	0.006	0.0403716	yes	GO:0004659; GO:0016765; GO:0016021; GO:0016020; GO:0008299; GO:0005739; GO:0005743; GO:0016740; GO:0002083; GO:0047293; GO:0006744	4-hydroxybenzoate decaprenyltransferase activity; mitochondrial inner membrane; transferase activity; isoprenoid biosynthetic process; ubiquinone biosynthetic process; membrane; mitochondrion; 4-hydroxybenzoate nonaprenyltransferase activity; transferase activity, transferring alkyl or aryl (other than methyl) groups; integral component of membrane; prenyltransferase activity	protein_coding
WBGene00000443	ceh-20	III:6979883-6981788	N2	rnp-6	OK	21.3263	14.3039	-0.576227	-2.32634	5e-05	0.000725861	yes	GO:0001225; GO:0043565; GO:0048337; GO:0009952; GO:0007501; GO:0003700; GO:0045893; GO:0005634; GO:0001158; GO:0006355; GO:0090575; GO:0045944; GO:0006351; GO:0005515; GO:0003677; GO:0009786; GO:0042692; GO:0007498; GO:0000977	muscle cell differentiation; enhancer sequence-specific DNA binding; regulation of transcription, DNA-templated; anterior/posterior pattern specification; DNA binding; regulation of asymmetric cell division; RNA polymerase II transcription coactivator binding; mesodermal cell fate specification; mesoderm development; positive regulation of mesodermal cell fate specification; nucleus; DNA binding …	protein_coding
WBGene00017389	lgc-38	III:7009145-7019574	N2	rnp-6	OK	0.45925	0.903227	0.97581	1.70819	0.00385	0.0286865	yes	GO:0006810; GO:1902476; GO:0005230; GO:0016020; GO:0005216; GO:0034220; GO:0006821; GO:0045202; GO:0005886; GO:0006811; GO:0004890; GO:0005254; GO:0016021; GO:0030054; GO:0007165	ion transport; synapse; ion transmembrane transport; chloride transmembrane transport; chloride transport; GABA-A receptor activity; signal transduction; chloride channel activity; ion channel activity; cell junction; extracellular ligand-gated ion channel activity; transport; membrane; integral component of membrane; plasma membrane	protein_coding
WBGene00002182	kap-1	III:7339000-7343626	N2	rnp-6	OK	1.84981	0.769126	-1.26608	-2.94514	5e-05	0.000725861	yes	GO:0030993; GO:0035869; GO:0019894; GO:0005488; GO:0007018; GO:0097730; GO:1902857; GO:0005515; GO:0035720; GO:0005871; GO:0003777; GO:1902856	non-motile cilium; kinesin complex; microtubule-based movement; ciliary transition zone; protein binding; kinesin binding; binding; negative regulation of non-motile cilium assembly; positive regulation of non-motile cilium assembly; microtubule motor activity; axonemal heterotrimeric kinesin-II complex; intraciliary anterograde transport	protein_coding
WBGene00020200	T04A6.1	III:7616527-7617594	N2	rnp-6	OK	29.7207	8.3365	-1.83396	-5.5963	5e-05	0.000725861	yes	; GO:0016021; GO:0016020	; integral component of membrane; membrane	protein_coding
WBGene00022799	ZK688.4	III:7895023-7895270	N2	rnp-6	OK	2.25895	0	-inf		0.0004	0.00457121	yes			protein_coding
WBGene00022797	best-24	III:7901032-7904473	N2	rnp-6	OK	8.09692	11.0392	0.447193	1.8086	0.00165	0.0145952	yes	GO:0006810; GO:1902476; GO:0016021; GO:0016020; GO:0034707; GO:0006821; GO:0005886; GO:0005254; GO:0006811	chloride channel complex; chloride transmembrane transport; chloride transport; chloride channel activity; ion transport; plasma membrane; membrane; integral component of membrane; transport	protein_coding
WBGene00016207	C29E4.10	III:7937856-7940931	N2	rnp-6	OK	1.01556	0.474106	-1.099	-2.09486	0.00115	0.01096	yes	GO:0016787; GO:0006629; GO:0016798; GO:0016042; GO:0006683; GO:0004336; GO:0008152; GO:0006665	hydrolase activity, acting on glycosyl bonds; galactosylceramidase activity; hydrolase activity; metabolic process; galactosylceramide catabolic process; lipid metabolic process; sphingolipid metabolic process; lipid catabolic process	protein_coding
WBGene00000448	pros-1	III:8067288-8071422	N2	rnp-6	OK	2.76036	1.63084	-0.759236	-2.14092	0.0004	0.00457121	yes	GO:0030182; GO:0000122; GO:0005634; GO:0006355; GO:0006357; GO:0045944; GO:0006351; GO:0003677; GO:0001078; GO:0007275; GO:0000981	negative regulation of transcription from RNA polymerase II promoter; RNA polymerase II transcription factor activity, sequence-specific DNA binding; neuron differentiation; regulation of transcription, DNA-templated; DNA binding; nucleus; positive regulation of transcription from RNA polymerase II promoter; regulation of transcription from RNA polymerase II promoter; transcription, DNA-templated…	protein_coding
WBGene00019456	K06H7.2	III:8093584-8096307	N2	rnp-6	OK	5.87284	3.58773	-0.710987	-2.13621	0.0006	0.00643061	yes	GO:0005515	protein binding	protein_coding
WBGene00015752	C14B9.2	III:8133664-8136649	N2	rnp-6	OK	36.0721	28.6584	-0.331925	-1.61142	0.0047	0.0334361	yes	GO:0006457; GO:0016853; GO:0030968; GO:0005788; GO:0003756; GO:0045454; GO:0005783	protein disulfide isomerase activity; endoplasmic reticulum unfolded protein response; protein folding; endoplasmic reticulum; isomerase activity; endoplasmic reticulum lumen; cell redox homeostasis	protein_coding
WBGene00017041	D2007.1	III:8155457-8155942	N2	rnp-6	OK	31.2911	7.80258	-2.00373	-4.72439	5e-05	0.000725861	yes	GO:0045087	innate immune response	protein_coding
WBGene00015350	fbxl-1	III:8229724-8232561	N2	rnp-6	OK	48.0941	38.8303	-0.308675	-1.52884	0.00725	0.0466777	yes	; GO:0035882; GO:0043053; GO:0005515	; protein binding; dauer entry; defecation rhythm	protein_coding
WBGene00003562	ncr-2	III:8258344-8265796	N2	rnp-6	OK	1.14713	1.73552	0.597331	1.70928	0.0023	0.0191136	yes	GO:0040024; GO:0040025; GO:0016021; GO:0016020; GO:0030301; GO:0005319; GO:0042632; GO:0007275	dauer larval development; vulval development; cholesterol transport; membrane; multicellular organism development; lipid transporter activity; integral component of membrane; cholesterol homeostasis	protein_coding
WBGene00007056	crn-7	III:8268614-8270735	N2	rnp-6	OK	5.72631	3.95035	-0.535626	-1.62455	0.00615	0.0411542	yes	GO:0006259; GO:0016787; GO:0004531; GO:0006309; GO:0005622	hydrolase activity; intracellular; DNA metabolic process; apoptotic DNA fragmentation; deoxyribonuclease II activity	protein_coding
WBGene00017361	F10E9.12	III:8324684-8325609	N2	rnp-6	OK	33.4399	24.6706	-0.438778	-1.62797	0.00455	0.0326223	yes			protein_coding
WBGene00044443	ZC21.10	III:8529224-8531135	N2	rnp-6	OK	5.75249	3.28572	-0.807979	-1.67387	0.0054	0.0372683	yes			protein_coding
WBGene00015518	C06E1.1	III:8605831-8606504	N2	rnp-6	OK	38.0677	26.9813	-0.496605	-1.84792	0.0012	0.0113201	yes	GO:0005515	protein binding	protein_coding
WBGene00006975	zfp-1	III:8792846-8807346	N2	rnp-6	OK	26.1697	34.5451	0.400583	1.64473	0.00505	0.0353622	yes	GO:0046872; GO:0035064; GO:0005634; GO:0000793; GO:0000785; GO:0008270; GO:0005515; GO:0003677; GO:0016246; GO:0003682	chromatin; RNA interference; chromatin binding; methylated histone binding; protein binding; DNA binding; zinc ion binding; nucleus; metal ion binding; condensed chromosome	protein_coding
WBGene00013982	ZK512.1	III:9115081-9117270	N2	rnp-6	OK	4.42553	1.81746	-1.28393	-2.80684	5e-05	0.000725861	yes	GO:0016021; GO:0016020	integral component of membrane; membrane	protein_coding
WBGene00000425	ced-11	III:9119464-9125150	N2	rnp-6	OK	5.24141	3.98408	-0.39571	-1.58206	0.0065	0.0429476	yes	GO:0016021; GO:0016020; GO:0006915	apoptotic process; integral component of membrane; membrane	protein_coding
WBGene00003067	lrg-1	III:9504763-9507081	N2	rnp-6	OK	8.17924	11.4578	0.486293	1.91236	0.00115	0.01096	yes
WBGene00006910	vha-1	III:9781242-9782057	N2	rnp-6	OK	202.431	164.05	-0.303291	-1.56151	0.00645	0.0426741	yes	GO:0033177; GO:0006810; GO:0030728; GO:0015991; GO:0005773; GO:0016021; GO:0016020; GO:0015078; GO:0033179; GO:0000220; GO:0009792; GO:0007042; GO:0046961; GO:0060142; GO:0015992; GO:0005774; GO:0006811; GO:0045121	vacuolar membrane; vacuole; vacuolar proton-transporting V-type ATPase, V0 domain; embryo development ending in birth or egg hatching; ovulation; proton-transporting V-type ATPase, V0 domain; membrane raft; proton transport; ion transport; regulation of syncytium formation by plasma membrane fusion; lysosomal lumen acidification; proton-transporting ATPase activity, rotational mechanism; membrane…	protein_coding
WBGene00009595	F40F12.7	III:9914260-9915817	N2	rnp-6	OK	41.9136	19.9692	-1.06964	-4.27682	5e-05	0.000725861	yes	GO:0005634; GO:0004402; GO:0003712; GO:0006355; GO:0008270; GO:0016573; GO:0046872	regulation of transcription, DNA-templated; zinc ion binding; histone acetylation; histone acetyltransferase activity; nucleus; metal ion binding; transcription cofactor activity	protein_coding
WBGene00010545	cbp-2	III:9923173-9924793	N2	rnp-6	OK	22.9498	15.0773	-0.606106	-2.40955	5e-05	0.000725861	yes	GO:0005634; GO:0004402; GO:0003712; GO:0006355; GO:0008270; GO:0016573; GO:0046872	regulation of transcription, DNA-templated; zinc ion binding; histone acetylation; histone acetyltransferase activity; nucleus; metal ion binding; transcription cofactor activity	protein_coding
WBGene00010865	M04D8.7	III:10037447-10038247	N2	rnp-6	OK	3.34496	1.02544	-1.70575	-2.49557	0.00055	0.00597832	yes	GO:0016021; GO:0016020	integral component of membrane; membrane	protein_coding
WBGene00000768	cor-1	III:10249129-10254710	N2	rnp-6	OK	2.00123	3.56192	0.831766	2.33847	5e-05	0.000725861	yes	GO:0005856; GO:0005737; GO:0015629; GO:0051015; GO:0003779; GO:0030036; GO:0005515	actin filament binding; actin binding; protein binding; cytoplasm; cytoskeleton; actin cytoskeleton; actin cytoskeleton organization	protein_coding
WBGene00010757	pad-2	III:10279128-10281476	N2	rnp-6	OK	8.26345	5.18283	-0.673005	-2.17709	0.00045	0.00504819	yes	; GO:0005794; GO:0036066; GO:0005975; GO:0005783; GO:0006486; GO:0005575; GO:0016740; GO:0003674; GO:0016757; GO:0006004; GO:0046922	transferase activity, transferring glycosyl groups; ; protein glycosylation; Golgi apparatus; fucose metabolic process; transferase activity; carbohydrate metabolic process; cellular_component; endoplasmic reticulum; protein O-linked fucosylation; peptide-O-fucosyltransferase activity; molecular_function	protein_coding
WBGene00010756	K10G9.2	III:10285922-10288611	N2	rnp-6	OK	4.52247	1.81969	-1.31342	-3.19601	5e-05	0.000725861	yes			protein_coding
WBGene00008426	D2045.9	III:10475969-10479753	N2	rnp-6	OK	9.50361	4.90812	-0.953306	-3.46065	5e-05	0.000725861	yes			protein_coding
WBGene00008424	D2045.7	III:10479883-10482144	N2	rnp-6	OK	7.15708	4.89067	-0.54934	-1.6033	0.0068	0.044487	yes	GO:0005737; GO:0004674; GO:0006468; GO:0005524; GO:0004672	protein kinase activity; cytoplasm; protein serine/threonine kinase activity; ATP binding; protein phosphorylation	protein_coding
WBGene00008425	D2045.8	III:10482326-10483927	N2	rnp-6	OK	15.0324	10.6975	-0.4908	-1.64498	0.00465	0.03317	yes	GO:0051260; GO:0005515	protein binding; protein homooligomerization	protein_coding
WBGene00009653	F43D9.1	III:10488127-10500267	N2	rnp-6	OK	2.64382	1.01767	-1.37736	-4.15446	5e-05	0.000725861	yes	GO:0005813; GO:0016021; GO:0016020	integral component of membrane; centrosome; membrane	protein_coding
WBGene00012860	acdh-11	III:10566198-10571606	N2	rnp-6	OK	55.4467	72.8573	0.393971	2.04583	0.0005	0.00551085	yes	GO:0006631; GO:0006629; GO:0016627; GO:0000166; GO:0008152; GO:0003995; GO:0055114; GO:0016491	oxidoreductase activity, acting on the CH-CH group of donors; fatty acid metabolic process; oxidoreductase activity; metabolic process; oxidation-reduction process; lipid metabolic process; nucleotide binding; acyl-CoA dehydrogenase activity	protein_coding
WBGene00012966	exos-1	III:11009042-11010595	N2	rnp-6	OK	57.6309	43.8417	-0.394537	-1.73684	0.00225	0.0187814	yes	GO:0005737; GO:0090305; GO:0005634; GO:0000176; GO:0004527	cytoplasm; nuclear exosome (RNase complex); nucleus; exonuclease activity; nucleic acid phosphodiester bond hydrolysis	protein_coding
WBGene00012972	rsa-2	III:11063528-11068758	N2	rnp-6	OK	42.5166	52.4834	0.303836	1.57227	0.00755	0.0480515	yes	; GO:0005856; GO:0030674; GO:0048566; GO:0005813; GO:0008013; GO:0005737; GO:0007052; GO:0005515; GO:0033365; GO:0005815; GO:0007049	; mitotic spindle organization; cytoplasm; beta-catenin binding; protein localization to organelle; microtubule organizing center; cell cycle; protein binding; cytoskeleton; protein binding, bridging; centrosome; embryonic digestive tract development	protein_coding
WBGene00012938	Y47D3A.32	III:11252415-11256642	N2	rnp-6	OK	18.7488	8.20698	-1.19188	-2.49763	0.0001	0.00135972	yes	GO:0016021; GO:0016020	integral component of membrane; membrane	protein_coding
WBGene00012939	Y47D3B.1	III:11382280-11388626	N2	rnp-6	OK	1.05279	0.528287	-0.994828	-1.81282	0.00325	0.0250162	yes	GO:0016021; GO:0016020	integral component of membrane; membrane	protein_coding
WBGene00012750	faah-6	III:11650470-11656185	N2	rnp-6	OK	4.19059	2.40601	-0.800512	-2.33048	0.0002	0.00250605	yes	GO:0016787; GO:0016884; GO:0004040	hydrolase activity; amidase activity; carbon-nitrogen ligase activity, with glutamine as amido-N-donor	protein_coding
WBGene00000670	col-95	III:11703978-11705085	N2	rnp-6	OK	178.18	228.684	0.360023	1.89643	0.00145	0.013173	yes	GO:0016021; GO:0016020; GO:0005581; GO:0042302	structural constituent of cuticle; collagen trimer; integral component of membrane; membrane	protein_coding
WBGene00012757	Y41C4A.11	III:11719899-11723602	N2	rnp-6	OK	0.664443	3.20334	2.26936	4.26634	5e-05	0.000725861	yes	GO:0006891; GO:0006890; GO:0006888; GO:0030968; GO:0016021; GO:0016020; GO:0030126; GO:0006886	ER to Golgi vesicle-mediated transport; COPI vesicle coat; retrograde vesicle-mediated transport, Golgi to ER; endoplasmic reticulum unfolded protein response; intra-Golgi vesicle-mediated transport; membrane; intracellular protein transport; integral component of membrane	protein_coding
WBGene00003417	mrt-2	III:11747041-11750172	N2	rnp-6	OK	23.2339	17.6672	-0.39516	-1.56036	0.00595	0.0401087	yes	GO:0000723; GO:0030896; GO:0008408; GO:0000077; GO:0008630; GO:0005634; GO:0006289; GO:0090305; GO:0005515; GO:0003684; GO:0007004	DNA damage checkpoint; damaged DNA binding; nucleotide-excision repair; 3'-5' exonuclease activity; protein binding; checkpoint clamp complex; nucleic acid phosphodiester bond hydrolysis; telomere maintenance via telomerase; nucleus; telomere maintenance; intrinsic apoptotic signaling pathway in response to DNA damage	protein_coding
WBGene00007682	C18D11.6	III:11810555-11811048	N2	rnp-6	OK	34.252	19.4889	-0.813536	-2.37634	0.0001	0.00135972	yes			protein_coding
WBGene00007679	C18D11.1	III:11816568-11819798	N2	rnp-6	OK	4.51045	2.53893	-0.829053	-2.07111	0.0009	0.00897191	yes	GO:0016021; GO:0016020	integral component of membrane; membrane	protein_coding
WBGene00003234	mif-1	III:11847901-11850034	N2	rnp-6	OK	10.2465	5.4454	-0.912024	-2.92209	5e-05	0.000725861	yes			protein_coding
WBGene00013233	sdz-33	III:11907528-11908474	N2	rnp-6	OK	9.42281	6.37952	-0.56271	-1.72181	0.0027	0.0216483	yes			protein_coding
WBGene00013541	Y75B8A.4	III:12107773-12113471	N2	rnp-6	OK	19.3901	13.2412	-0.550283	-2.45781	5e-05	0.000725861	yes	GO:0004176; GO:0016787; GO:0005782; GO:0004252; GO:0006625; GO:0005777; GO:0000166; GO:0030163; GO:0006515; GO:0016485; GO:0006508; GO:0008233; GO:0005524; GO:0008236	serine-type endopeptidase activity; protein quality control for misfolded or incompletely synthesized proteins; ATP-dependent peptidase activity; serine-type peptidase activity; hydrolase activity; protein catabolic process; protein processing; peptidase activity; protein targeting to peroxisome; peroxisomal matrix; ATP binding; peroxisome; proteolysis; nucleotide binding	protein_coding
WBGene00004172	pqn-92	III:12307780-12311911	N2	rnp-6	OK	11.0304	16.5816	0.588093	2.35663	5e-05	0.000725861	yes			protein_coding
WBGene00013036	fbxa-218	III:12436551-12441104	N2	rnp-6	OK	0.933144	3.17552	1.76682	4.12482	5e-05	0.000725861	yes			protein_coding
WBGene00000673	col-98	III:13018934-13020231	N2	rnp-6	OK	10.3705	14.378	0.471379	1.67184	0.00405	0.0298522	yes	GO:0016021; GO:0016020; GO:0005581; GO:0042302	structural constituent of cuticle; collagen trimer; integral component of membrane; membrane	protein_coding
WBGene00012717	Y39E4B.6	III:13070759-13075032	N2	rnp-6	OK	8.83235	5.28168	-0.741801	-2.28689	0.00015	0.00195025	yes	GO:0005737; GO:0017069; GO:0005634; GO:0000122; GO:0004861; GO:0071901	negative regulation of transcription from RNA polymerase II promoter; snRNA binding; cytoplasm; nucleus; negative regulation of protein serine/threonine kinase activity; cyclin-dependent protein serine/threonine kinase inhibitor activity	protein_coding
WBGene00003249	mig-18	III:13403246-13404306	N2	rnp-6	OK	12.1418	3.86913	-1.6499	-4.38452	5e-05	0.000725861	yes			protein_coding
WBGene00013574	lron-13	III:13527437-13539952	N2	rnp-6	OK	0.555854	0.274649	-1.01711	-1.71357	0.00665	0.0436819	yes			protein_coding
WBGene00011729	set-16	III:13643917-13656785	N2	rnp-6	OK	26.5244	34.74	0.389274	2.05298	5e-05	0.000725861	yes	GO:0018024; GO:0032259; GO:0042800; GO:0005634; GO:0040028; GO:0016740; GO:0008270; GO:0005515; GO:0051568; GO:0008168; GO:0046872; GO:0044666	methylation; histone H3-K4 methylation; transferase activity; zinc ion binding; methyltransferase activity; MLL3/4 complex; nucleus; metal ion binding; protein binding; regulation of vulval development; histone methyltransferase activity (H3-K4 specific); histone-lysine N-methyltransferase activity	protein_coding
WBGene00000179	aqp-11	III:13673277-13674745	N2	rnp-6	OK	34.0845	23.2734	-0.550432	-2.25369	5e-05	0.000725861	yes	GO:0016021; GO:0016020	integral component of membrane; membrane	protein_coding
WBGene00023451	mlc-7	III:13752468-13755861	N2	rnp-6	OK	31.7735	42.8173	0.430368	1.71544	0.00245	0.0200889	yes	GO:0005509	calcium ion binding	protein_coding
WBGene00021043	pck-1	III:62886-66261	N2	rnp-6	OK	43.0288	69.4287	0.690231	3.52235	5e-05	0.000725861	yes	GO:0005737; GO:0016310; GO:0005829; GO:0016301; GO:0004613; GO:0004611; GO:0055120; GO:0017076; GO:0005525; GO:0006094	phosphoenolpyruvate carboxykinase activity; phosphoenolpyruvate carboxykinase (GTP) activity; cytosol; cytoplasm; gluconeogenesis; striated muscle dense body; phosphorylation; kinase activity; GTP binding; purine nucleotide binding	protein_coding
WBGene00018794	attf-3	III:70441-86384	N2	rnp-6	OK	24.7929	33.639	0.440211	2.24599	0.0002	0.00250605	yes	GO:0003676	nucleic acid binding	protein_coding
WBGene00019639	K10F12.7	III:381899-382570	N2	rnp-6	OK	0.280798	1.07585	1.93787	1.95597	0.0075	0.0478343	yes			protein_coding
WBGene00017937	F30H5.3	III:505236-512175	N2	rnp-6	OK	0.746755	0.14106	-2.40433	-4.57499	5e-05	0.000725861	yes	GO:0010951; GO:0004867	serine-type endopeptidase inhibitor activity; negative regulation of endopeptidase activity	protein_coding
WBGene00002269	lec-6	III:599508-600609	N2	rnp-6	OK	311.174	238.207	-0.385505	-1.90466	0.0013	0.0120757	yes	GO:0005737; GO:0030246	cytoplasm; carbohydrate binding	protein_coding
WBGene00020559	best-17	III:607044-609973	N2	rnp-6	OK	0.726611	0.33084	-1.13505	-1.72466	0.00775	0.0489842	yes	GO:0006810; GO:1902476; GO:0016021; GO:0016020; GO:0034707; GO:0006821; GO:0005886; GO:0005254; GO:0006811	chloride channel complex; chloride transmembrane transport; chloride transport; chloride channel activity; ion transport; plasma membrane; membrane; integral component of membrane; transport	protein_coding
WBGene00020760	T24C4.4	III:872621-873531	N2	rnp-6	OK	34.1971	15.3011	-1.16024	-3.88183	5e-05	0.000725861	yes	GO:0016021; GO:0016020; GO:0045087	innate immune response; integral component of membrane; membrane	protein_coding
WBGene00003969	pef-1	III:919527-926314	N2	rnp-6	OK	2.68257	1.80716	-0.569889	-1.6192	0.00575	0.0390509	yes	GO:0016787; GO:0030425; GO:0042995; GO:0043204; GO:0006470; GO:0016020; GO:0005929; GO:0030145; GO:0004721; GO:0030424; GO:0050906; GO:0005509; GO:0005886; GO:0005506; GO:0046872; GO:0043025	calcium ion binding; axon; perikaryon; hydrolase activity; membrane; iron ion binding; neuronal cell body; dendrite; detection of stimulus involved in sensory perception; phosphoprotein phosphatase activity; metal ion binding; manganese ion binding; protein dephosphorylation; cell projection; cilium; plasma membrane	protein_coding
WBGene00020455	fbxa-59	III:940878-943458	N2	rnp-6	OK	6.32003	11.2522	0.832208	2.60522	5e-05	0.000725861	yes	GO:0045087; GO:0005515	innate immune response; protein binding	protein_coding
WBGene00020456	fbxa-60	III:944779-946292	N2	rnp-6	OK	43.4937	28.1777	-0.626251	-2.80301	5e-05	0.000725861	yes	GO:0045087; GO:0005515	innate immune response; protein binding	protein_coding
WBGene00022326	fbxa-14	III:1322131-1324633	N2	rnp-6	OK	5.37179	3.02063	-0.830552	-2.4591	5e-05	0.000725861	yes	GO:0005515	protein binding	protein_coding
WBGene00022349	Y82E9BR.17	III:1447528-1455770	N2	rnp-6	OK	30.8544	13.3892	-1.2044	-4.52219	5e-05	0.000725861	yes			protein_coding
WBGene00021253	Y22D7AL.15	III:1658247-1659863	N2	rnp-6	OK	104.482	81.218	-0.363377	-1.56713	0.00655	0.043217	yes	GO:0016021; GO:0016020	integral component of membrane; membrane	protein_coding
WBGene00021263	Y22D7AR.10	III:1701709-1702436	N2	rnp-6	OK	131.276	76.8172	-0.773104	-2.83082	5e-05	0.000725861	yes			protein_coding
WBGene00004779	ser-4	III:1723193-1733101	N2	rnp-6	OK	2.744	1.73567	-0.660783	-1.67561	0.0035	0.0265526	yes	GO:0004930; GO:0030594; GO:0005887; GO:0016021; GO:0016020; GO:0098664; GO:0007165; GO:0004871; GO:0007186; GO:0007210; GO:0004993	neurotransmitter receptor activity; G-protein coupled serotonin receptor signaling pathway; serotonin receptor signaling pathway; integral component of plasma membrane; signal transduction; G-protein coupled serotonin receptor activity; signal transducer activity; G-protein coupled receptor activity; membrane; G-protein coupled receptor signaling pathway; integral component of membrane	protein_coding
WBGene00004249	pvf-1	III:1821149-1824114	N2	rnp-6	OK	12.8832	17.6206	0.451777	1.69335	0.00315	0.0244316	yes	GO:0008284; GO:0045138; GO:0005615; GO:0070851; GO:0031954; GO:0016020; GO:1902842; GO:0008083	extracellular space; growth factor receptor binding; membrane; positive regulation of protein autophosphorylation; positive regulation of cell proliferation; growth factor activity; negative regulation of netrin-activated signaling pathway; nematode male tail tip morphogenesis	protein_coding
WBGene00021852	Y54F10AM.8	III:2503447-2507972	N2	rnp-6	OK	26.6268	18.1291	-0.554571	-2.51586	5e-05	0.000725861	yes	GO:0016787; GO:0005576; GO:0006629; GO:0016042	extracellular region; hydrolase activity; lipid catabolic process; lipid metabolic process	protein_coding
WBGene00021853	Y54F10AM.11	III:2561709-2566589	N2	rnp-6	OK	20.285	26.6853	0.395631	1.59188	0.00525	0.0364418	yes	GO:0005515	protein binding	protein_coding
WBGene00003941	pbo-1	III:2681444-2686463	N2	rnp-6	OK	40.8408	23.5629	-0.793492	-3.08067	5e-05	0.000725861	yes	GO:0005509	calcium ion binding	protein_coding
WBGene00022181	pho-9	III:2757167-2760816	N2	rnp-6	OK	25.7877	19.3111	-0.417254	-1.74428	0.0019	0.0163938	yes	GO:0016311; GO:0003993	acid phosphatase activity; dephosphorylation	protein_coding
WBGene00019997	R10F2.6	III:2937046-2944044	N2	rnp-6	OK	5.29285	3.56596	-0.569756	-2.183	5e-05	0.000725861	yes	GO:0006470; GO:0004725; GO:0035335	protein tyrosine phosphatase activity; peptidyl-tyrosine dephosphorylation; protein dephosphorylation	protein_coding
WBGene00021919	cutl-25	III:3042588-3047125	N2	rnp-6	OK	4.48371	2.58687	-0.793486	-2.14417	0.0003	0.00356315	yes	GO:0016021; GO:0016020	integral component of membrane; membrane	protein_coding
WBGene00003175	mec-12	III:3131573-3139221	N2	rnp-6	OK	5.49979	7.77886	0.500183	1.7533	0.0015	0.0135324	yes	GO:0050976; GO:0007017; GO:0007010; GO:0007638; GO:0005874; GO:0003924; GO:0009612; GO:0000166; GO:0001966; GO:0005200; GO:1905792; GO:0030424; GO:0043025; GO:1905789; GO:0005525	axon; structural constituent of cytoskeleton; detection of mechanical stimulus involved in sensory perception of touch; microtubule-based process; microtubule; GTPase activity; positive regulation of mechanosensory behavior; neuronal cell body; positive regulation of detection of mechanical stimulus involved in sensory perception of touch; thigmotaxis; GTP binding; response to mechanical stimulus…	protein_coding
WBGene00014207	ZK1058.9	III:3922206-3926118	N2	rnp-6	OK	14.5848	20.6193	0.499528	1.94765	0.0009	0.00897191	yes			protein_coding
WBGene00011214	R10E9.2	III:3962727-3964098	N2	rnp-6	OK	0.792548	1.66296	1.06918	1.74239	0.00485	0.0342461	yes			protein_coding
WBGene00007624	hrde-1	III:4172336-4176159	N2	rnp-6	OK	212.949	271.796	0.352014	1.88288	0.0018	0.0156835	yes	GO:0003676; GO:0005634; GO:0007281; GO:0005515; GO:0016246; GO:0031332	nucleic acid binding; RNA interference; protein binding; germ cell development; nucleus; RNAi effector complex	protein_coding
WBGene00007133	B0284.3	III:4379367-4381041	N2	rnp-6	OK	5.17026	3.05058	-0.761151	-1.65332	0.00745	0.0476127	yes	GO:0016021; GO:0016020	integral component of membrane; membrane	protein_coding
WBGene00003577	ndg-4	III:4462829-4467377	N2	rnp-6	OK	13.6412	6.04779	-1.17349	-4.62577	5e-05	0.000725861	yes	GO:0016021; GO:0016020	integral component of membrane; membrane	protein_coding
WBGene00010904	ugt-62	III:4537276-4540637	N2	rnp-6	OK	12.419	6.6744	-0.895841	-3.35853	5e-05	0.000725861	yes	GO:0008152; GO:0016021; GO:0016020; GO:0016740; GO:0016757; GO:0016758; GO:0015020; GO:0043231	transferase activity, transferring glycosyl groups; transferase activity; membrane; transferase activity, transferring hexosyl groups; metabolic process; glucuronosyltransferase activity; intracellular membrane-bounded organelle; integral component of membrane	protein_coding
WBGene00044078	tag-243	III:4686097-4687202	N2	rnp-6	OK	8.92951	5.5948	-0.674494	-1.91779	0.00155	0.013881	yes			protein_coding
WBGene00007173	B0393.8	III:4751877-4752370	N2	rnp-6	OK	110.146	84.4079	-0.383969	-1.5893	0.00535	0.0369777	yes	GO:0016021; GO:0016020	integral component of membrane; membrane	protein_coding
WBGene00044636	B0393.9	III:4778389-4780157	N2	rnp-6	OK	8.08406	4.16103	-0.958139	-2.40124	0.00015	0.00195025	yes			protein_coding
WBGene00016447	msd-4	III:4868333-4868769	N2	rnp-6	OK	2.85744	5.44508	0.930227	1.65538	0.0048	0.0339756	yes	GO:0031143; GO:0044297	cell body; pseudopodium	protein_coding
WBGene00004782	set-2	III:4922445-4930204	N2	rnp-6	OK	22.466	28.5807	0.347298	1.74489	0.00285	0.0225677	yes	GO:0016569; GO:0018024; GO:0005515; GO:0060290; GO:0005634; GO:0051568; GO:0006355; GO:0016740; GO:0003723; GO:0003676; GO:0008340; GO:0008168; GO:0032259; GO:0042800; GO:0007275; GO:0006351	nucleic acid binding; methylation; covalent chromatin modification; regulation of transcription, DNA-templated; transferase activity; transdifferentiation; histone-lysine N-methyltransferase activity; histone H3-K4 methylation; methyltransferase activity; nucleus; determination of adult lifespan; RNA binding; protein binding; transcription, DNA-templated; histone methyltransferase activity (H3-K4…	protein_coding
WBGene00021316	Y32H12A.8	III:5385616-5404985	N2	rnp-6	OK	10.7784	13.192	0.291523	1.51356	0.0078	0.0492264	yes	GO:0005634; GO:0005515	protein binding; nucleus	protein_coding
WBGene00044410	F48E8.8	III:5448800-5449868	N2	rnp-6	OK	3.07181	1.07917	-1.50916	-2.48341	0.00015	0.00195025	yes			protein_coding
WBGene00017031	D1044.6	III:5535657-5543168	N2	rnp-6	OK	41.8324	52.7384	0.334233	1.75685	0.00265	0.0213265	yes			protein_coding
WBGene00017304	F09F7.7	III:5553488-5554934	N2	rnp-6	OK	72.4383	53.1027	-0.447968	-2.11609	0.00015	0.00195025	yes	GO:0070988; GO:0051213; GO:0035511; GO:0035516; GO:0046872; GO:0055114; GO:0016491	oxidoreductase activity; oxidative DNA demethylase activity; dioxygenase activity; demethylation; oxidation-reduction process; oxidative DNA demethylation; metal ion binding	protein_coding
WBGene00017146	EGAP1.1	III:5935691-5937220	N2	rnp-6	OK	0.80719	0.227815	-1.82504	-2.01222	0.00515	0.0358984	yes			protein_coding
WBGene00003796	npp-10	III:6013494-6019552	N2	rnp-6	OK	127.104	161.547	0.34594	1.78236	0.00195	0.0167396	yes	GO:0005635; GO:0034501; GO:0009792; GO:0005487; GO:0008233; GO:0051028; GO:0007049; GO:0008236; GO:0005737; GO:0034398; GO:0043186; GO:0090435; GO:0005634; GO:0016020; GO:0043657; GO:0051301; GO:0006508; GO:0005694; GO:0006405; GO:0016787; GO:0017056; GO:0008139; GO:0006606; GO:0006810; GO:0031965; GO:1990893; GO:0044614; GO:0000776; GO:0030719; GO:0006997; GO:0031081; GO:0005643; GO:0000973; GO:…	RNA export from nucleus; telomere tethering at nuclear periphery; hydrolase activity; RNA binding; nucleus organization; protein import into nucleus; P granule; P granule organization; proteolysis; chromosome; kinetochore; cell division; mRNA transport; transport; cytoplasm; nuclear pore activity; posttranscriptional tethering of RNA polymerase II gene DNA at nuclear periphery; structural constit…	protein_coding
WBGene00220242	npp-10	III:6013494-6019552	N2	rnp-6	OK	127.104	161.547	0.34594	1.78236	0.00195	0.0167396	yes
WBGene00018343	F42A10.7	III:6177914-6178702	N2	rnp-6	OK	13.7309	5.38371	-1.35076	-3.76173	5e-05	0.000725861	yes			protein_coding
WBGene00018562	F47D12.6	III:6286632-6287315	N2	rnp-6	OK	11.5385	7.34031	-0.652542	-1.55981	0.0079	0.0496976	yes			protein_coding
WBGene00015483	C05D11.5	III:6410035-6411559	N2	rnp-6	OK	18.3216	12.6618	-0.533064	-1.92286	0.0009	0.00897191	yes	GO:0008903; GO:0016853	isomerase activity; hydroxypyruvate isomerase activity	protein_coding
WBGene00015640	C09E7.6	III:6541549-6546425	N2	rnp-6	OK	6.90281	9.9846	0.532522	2.2995	5e-05	0.000725861	yes
WBGene00002889	let-765	III:6592566-6601171	N2	rnp-6	OK	53.7657	65.8243	0.291934	1.56443	0.00725	0.0466777	yes	GO:0045138; GO:0005634; GO:0046579; GO:0042660; GO:0006355; GO:0072327	vulval cell fate specification; regulation of transcription, DNA-templated; positive regulation of Ras protein signal transduction; nucleus; positive regulation of cell fate specification; nematode male tail tip morphogenesis	protein_coding
WBGene00000395	cdh-3	III:7741272-7754448	N2	rnp-6	OK	2.23075	1.37916	-0.693738	-2.73282	5e-05	0.000725861	yes	GO:0005737; GO:0045138; GO:0016331; GO:0007156; GO:0016021; GO:0016020; GO:0005198; GO:0016323; GO:0005604; GO:0005509; GO:0005886; GO:0007155; GO:0046872; GO:0030054; GO:0034769	calcium ion binding; basement membrane disassembly; cytoplasm; homophilic cell adhesion via plasma membrane adhesion molecules; structural molecule activity; integral component of membrane; basolateral plasma membrane; nematode male tail tip morphogenesis; basement membrane; metal ion binding; membrane; cell adhesion; morphogenesis of embryonic epithelium; cell junction; plasma membrane	protein_coding
WBGene00022516	mtx-2	III:7761976-7763605	N2	rnp-6	OK	81.5941	61.2598	-0.413523	-1.95421	0.00055	0.00597832	yes	; GO:0006626; GO:0005741	; mitochondrial outer membrane; protein targeting to mitochondrion	protein_coding
WBGene00017322	clec-160	III:8272955-8275971	N2	rnp-6	OK	10.8694	8.1074	-0.422957	-1.67129	0.00355	0.0268498	yes	GO:0005575; GO:0008150; GO:0005576; GO:0003674; GO:0030246	extracellular region; carbohydrate binding; cellular_component; molecular_function; biological_process	protein_coding
WBGene00017698	F22B7.9	III:8652577-8653907	N2	rnp-6	OK	24.8044	18.4268	-0.428795	-1.6838	0.00395	0.0292687	yes			protein_coding
WBGene00018418	F44E2.4	III:8832466-8838424	N2	rnp-6	OK	2.56625	0.71434	-1.84498	-5.24157	5e-05	0.000725861	yes	GO:0016021; GO:0016020; GO:0005515	protein binding; integral component of membrane; membrane	protein_coding
WBGene00011142	R08D7.1	III:8966043-8967727	N2	rnp-6	OK	50.0611	64.1639	0.358073	1.77565	0.00165	0.0145952	yes			protein_coding
WBGene00010310	F59B2.8	III:9007973-9010121	N2	rnp-6	OK	1.24398	0.394838	-1.65563	-2.59039	0.00045	0.00504819	yes	GO:0005515	protein binding	protein_coding
WBGene00001385	far-1	III:9080366-9081179	N2	rnp-6	OK	475.585	683.34	0.522899	2.79221	5e-05	0.000725861	yes	; GO:0005576; GO:0008289	extracellular region; ; lipid binding	protein_coding
WBGene00003597	nhl-1	III:9146046-9153890	N2	rnp-6	OK	4.83085	7.0502	0.545387	2.1527	0.00015	0.00195025	yes	GO:0016567; GO:0046872; GO:0004842; GO:0008270; GO:0005515	protein ubiquitination; protein binding; ubiquitin-protein transferase activity; metal ion binding; zinc ion binding	protein_coding
WBGene00002081	ina-1	III:9168039-9172802	N2	rnp-6	OK	21.4646	15.9802	-0.425673	-2.08983	0.00025	0.00303907	yes	GO:0001764; GO:0007413; GO:0045138; GO:0031410; GO:0016021; GO:0016020; GO:0009887; GO:0008078; GO:0008305; GO:0005886; GO:0007155; GO:0010171; GO:0042995; GO:0001891; GO:0007399; GO:0030670; GO:0007229; GO:0002119; GO:0032228; GO:0004888; GO:0005515; GO:0033631	transmembrane signaling receptor activity; mesodermal cell migration; integrin complex; cell projection; nematode male tail tip morphogenesis; regulation of synaptic transmission, GABAergic; protein binding; body morphogenesis; cytoplasmic vesicle; integrin-mediated signaling pathway; plasma membrane; membrane; cell adhesion; cell-cell adhesion mediated by integrin; phagocytic vesicle membrane; a…	protein_coding
WBGene00013847	cls-3	III:9186076-9199507	N2	rnp-6	OK	12.6209	20.0539	0.66807	3.11217	5e-05	0.000725861	yes	GO:0005856; GO:0005737; GO:0040001; GO:0030953; GO:0005488; GO:0005874	microtubule; cytoplasm; establishment of mitotic spindle localization; astral microtubule organization; binding; cytoskeleton	protein_coding
WBGene00010796	clip-1	III:9257258-9269062	N2	rnp-6	OK	4.61027	6.54015	0.504472	1.79391	0.0021	0.0177668	yes	; GO:0006997; GO:0008017; GO:0005635; GO:0005515; GO:0051647	; nuclear envelope; protein binding; nucleus localization; nucleus organization; microtubule binding	protein_coding
WBGene00001263	emb-9	III:9336876-9344447	N2	rnp-6	OK	81.2329	108.289	0.414745	2.22666	0.00025	0.00303907	yes	GO:0005201; GO:0005604; GO:0005581; GO:0050714; GO:0002119; GO:0007517; GO:0009792; GO:0030198; GO:0005578; GO:0005576	nematode larval development; embryo development ending in birth or egg hatching; extracellular matrix organization; extracellular region; muscle organ development; positive regulation of protein secretion; basement membrane; extracellular matrix structural constituent; proteinaceous extracellular matrix; collagen trimer	protein_coding
WBGene00010573	K04H4.2	III:9347713-9355480	N2	rnp-6	OK	0.757937	0.180311	-2.07159	-2.88958	5e-05	0.000725861	yes	; GO:0006030; GO:0005576; GO:0008061	extracellular region; ; chitin metabolic process; chitin binding	protein_coding
WBGene00014220	ZK1098.3	III:9532434-9538698	N2	rnp-6	OK	5.0863	2.7579	-0.883049	-2.93268	5e-05	0.000725861	yes	GO:0005737; GO:0016787; GO:0008408; GO:0006139; GO:0004518; GO:0005634; GO:0090305; GO:0003676; GO:0004527	nucleobase-containing compound metabolic process; nucleic acid binding; nuclease activity; hydrolase activity; cytoplasm; nucleic acid phosphodiester bond hydrolysis; nucleus; 3'-5' exonuclease activity; exonuclease activity	protein_coding
WBGene00043992	bbs-4	III:9609567-9612191	N2	rnp-6	OK	0.775986	0.241891	-1.68168	-1.86804	0.0027	0.0216483	yes	GO:0005856; GO:0005737; GO:0000242; GO:0006810; GO:0036064; GO:0030030; GO:0060170; GO:0016020; GO:0005929; GO:0005815; GO:1905515; GO:0007098; GO:0005515; GO:0005886; GO:0015031; GO:0042995; GO:0003777; GO:0034464	centrosome cycle; cytoplasm; ciliary basal body; membrane; ciliary membrane; microtubule organizing center; non-motile cilium assembly; BBSome; pericentriolar material; plasma membrane; protein transport; cell projection organization; protein binding; cytoskeleton; cell projection; cilium; transport; microtubule motor activity	protein_coding
WBGene00001570	gei-13	III:9632187-9637116	N2	rnp-6	OK	2.38969	1.17604	-1.02289	-2.84213	5e-05	0.000725861	yes	GO:0005575; GO:0046872; GO:0005515; GO:0003676; GO:0003677	nucleic acid binding; DNA binding; cellular_component; metal ion binding; protein binding	protein_coding
WBGene00007402	ugt-60	III:9676328-9679040	N2	rnp-6	OK	2.99724	1.71211	-0.807854	-2.13263	0.00025	0.00303907	yes	GO:0008152; GO:0016021; GO:0016020; GO:0016740; GO:0016757; GO:0016758; GO:0015020; GO:0043231	transferase activity, transferring glycosyl groups; transferase activity; membrane; transferase activity, transferring hexosyl groups; metabolic process; glucuronosyltransferase activity; intracellular membrane-bounded organelle; integral component of membrane	protein_coding
WBGene00010778	gpdh-2	III:9854074-9859183	N2	rnp-6	OK	183.805	233.594	0.345824	1.8331	0.00135	0.0124346	yes	GO:0004367; GO:0005737; GO:0005975; GO:0009331; GO:0016616; GO:0046168; GO:0051287; GO:0006973; GO:0004368; GO:0006972; GO:0006072; GO:0042803; GO:0055114; GO:0016491	glycerol-3-phosphate dehydrogenase [NAD+] activity; protein homodimerization activity; glycerol-3-phosphate metabolic process; cytoplasm; carbohydrate metabolic process; oxidoreductase activity; glycerol-3-phosphate catabolic process; oxidoreductase activity, acting on the CH-OH group of donors, NAD or NADP as acceptor; glycerol-3-phosphate dehydrogenase complex; oxidation-reduction process; hype…	protein_coding
WBGene00001603	gln-2	III:9943239-9944761	N2	rnp-6	OK	0.225853	0.69165	1.61466	1.9902	0.00355	0.0268498	yes	GO:0005737; GO:0004356; GO:0000166; GO:0003824; GO:0006807; GO:0006542; GO:0016874; GO:0005524	cytoplasm; nitrogen compound metabolic process; glutamate-ammonia ligase activity; glutamine biosynthetic process; ligase activity; ATP binding; catalytic activity; nucleotide binding	protein_coding
WBGene00011803	T16G12.1	III:10040180-10049781	N2	rnp-6	OK	2.25503	1.30228	-0.792109	-2.74897	5e-05	0.000725861	yes	GO:0005737; GO:0042277; GO:0043171; GO:0046662; GO:0008270; GO:0070006; GO:0006508; GO:1903538; GO:0008237	peptide binding; metalloaminopeptidase activity; regulation of oviposition; cytoplasm; regulation of meiotic cell cycle process involved in oocyte maturation; zinc ion binding; peptide catabolic process; metallopeptidase activity; proteolysis	protein_coding
WBGene00194683	T20G5.15	III:10195906-10197080	N2	rnp-6	OK	0.885053	0.231022	-1.93773	-2.07884	0.00615	0.0411542	yes
WBGene00000667	col-92	III:10982165-10983253	N2	rnp-6	OK	1.81815	3.18145	0.807212	1.80893	0.0022	0.0184426	yes	GO:0016021; GO:0016020; GO:0005581; GO:0042302	structural constituent of cuticle; collagen trimer; integral component of membrane; membrane	protein_coding
WBGene00012969	Y48A6B.8	III:11027249-11029437	N2	rnp-6	OK	1.55672	4.61605	1.56815	4.44412	5e-05	0.000725861	yes	GO:0005634	nucleus	protein_coding
WBGene00006604	tra-1	III:11172091-11195207	N2	rnp-6	OK	13.4752	18.7939	0.479955	1.90625	0.00075	0.00772691	yes	GO:0005737; GO:0043565; GO:0008022; GO:0005515; GO:0019099; GO:0000122; GO:0019101; GO:0001162; GO:0005634; GO:0030154; GO:0008406; GO:0007548; GO:0000980; GO:0007283; GO:0000977; GO:0003676; GO:0003677; GO:0046872; GO:0007275; GO:0043525	sex differentiation; nucleic acid binding; negative regulation of transcription from RNA polymerase II promoter; spermatogenesis; female somatic sex determination; cytoplasm; DNA binding; cell differentiation; RNA polymerase II distal enhancer sequence-specific DNA binding; protein C-terminus binding; female germ-line sex determination; nucleus; metal ion binding; gonad development; protein bindi…	protein_coding
WBGene00006556	tbx-37	III:11224799-11227125	N2	rnp-6	OK	0.670068	1.44893	1.11261	1.87727	0.00225	0.0187814	yes	GO:0003700; GO:0005634; GO:0006355; GO:0006351; GO:0003677; GO:0060465	regulation of transcription, DNA-templated; DNA binding; nucleus; DNA binding transcription factor activity; pharynx development; transcription, DNA-templated	protein_coding
WBGene00003759	nlp-21	III:11388629-11393260	N2	rnp-6	OK	12.4194	17.3992	0.486425	1.62467	0.00475	0.0337236	yes	GO:0007218	neuropeptide signaling pathway	protein_coding
WBGene00000671	col-96	III:11705712-11706644	N2	rnp-6	OK	3.80509	7.61639	1.00118	2.73491	5e-05	0.000725861	yes	GO:0016021; GO:0016020; GO:0005581; GO:0042302	structural constituent of cuticle; collagen trimer; integral component of membrane; membrane	protein_coding
WBGene00007703	gbf-1	III:11751256-11773683	N2	rnp-6	OK	19.6584	24.4803	0.316471	1.63934	0.00455	0.0326223	yes	GO:0016197; GO:0000137; GO:0046903; GO:0016192; ; GO:0070971; GO:0007029; GO:0005802; GO:0005086; GO:0005488; GO:0032012; GO:0007005; GO:0043547	; Golgi cis cisterna; binding; endosomal transport; vesicle-mediated transport; positive regulation of GTPase activity; regulation of ARF protein signal transduction; endoplasmic reticulum organization; trans-Golgi network; secretion; endoplasmic reticulum exit site; mitochondrion organization; ARF guanyl-nucleotide exchange factor activity	protein_coding
WBGene00013227	Y56A3A.6	III:11871254-11878849	N2	rnp-6	OK	3.80614	5.21121	0.453288	1.63508	0.0045	0.0323767	yes			protein_coding
WBGene00013230	fbxb-22	III:11882583-11883539	N2	rnp-6	OK	5.17804	3.22688	-0.682266	-1.75342	0.00365	0.0274633	yes			protein_coding
WBGene00013579	Y79H2A.2	III:12028966-12030754	N2	rnp-6	OK	14.2641	9.20404	-0.632046	-1.84312	0.00165	0.0145952	yes	GO:0016021; GO:0016020	integral component of membrane; membrane	protein_coding
WBGene00013540	Y75B8A.3	III:12101744-12106535	N2	rnp-6	OK	2.75531	3.93031	0.51243	1.74284	0.0025	0.0203879	yes	GO:0042043; GO:0009986; GO:0052689; GO:0005622; GO:0004872; GO:0005887; GO:0097105; GO:0097104; GO:0007158; GO:0050804; GO:0048488; GO:0045202	carboxylic ester hydrolase activity; synapse; neuron cell-cell adhesion; integral component of plasma membrane; intracellular; postsynaptic membrane assembly; neurexin family protein binding; modulation of chemical synaptic transmission; cell surface; receptor activity; synaptic vesicle endocytosis; presynaptic membrane assembly	protein_coding
WBGene00013549	Y75B8A.13	III:12203763-12215686	N2	rnp-6	OK	14.9884	19.5699	0.384789	1.90301	0.00085	0.00858204	yes			protein_coding
WBGene00013031	Y49E10.7	III:12377730-12378829	N2	rnp-6	OK	1.9822	1.00875	-0.974539	-1.81692	0.00435	0.0315234	yes
WBGene00013037	Y49E10.18	III:12442635-12446119	N2	rnp-6	OK	12.7814	9.35739	-0.449863	-1.56973	0.0069	0.0450085	yes	GO:0016787; GO:0006629	hydrolase activity; lipid metabolic process	protein_coding
WBGene00013039	scav-3	III:12453587-12456850	N2	rnp-6	OK	68.8132	52.8835	-0.379869	-1.92809	0.00065	0.0068644	yes	GO:0016021; GO:0016020	integral component of membrane; membrane	protein_coding
WBGene00004700	rsp-3	III:12686460-12687916	N2	rnp-6	OK	291.243	375.612	0.367019	1.8944	0.00105	0.0101691	yes	GO:0003676; GO:0005634; GO:0008380; GO:0009792; GO:0006376; GO:0003723; GO:0005515; GO:0007275; GO:0006397	nucleic acid binding; mRNA splice site selection; embryo development ending in birth or egg hatching; RNA binding; RNA splicing; mRNA processing; nucleus; protein binding; multicellular organism development	protein_coding
WBGene00012548	Y37D8A.6	III:12856826-12857913	N2	rnp-6	OK	15.1456	23.9277	0.659785	2.147	0.00015	0.00195025	yes	GO:0016021; GO:0016020	integral component of membrane; membrane	protein_coding
WBGene00000672	col-97	III:12987671-12993704	N2	rnp-6	OK	0.248018	1.14824	2.21091	2.35938	0.0003	0.00356315	yes	GO:0016021; GO:0016020; GO:0005581; GO:0042302	structural constituent of cuticle; collagen trimer; integral component of membrane; membrane	protein_coding
WBGene00010072	F54F12.1	III:13049616-13054085	N2	rnp-6	OK	0.130201	0.529113	2.02284	3.3467	5e-05	0.000725861	yes	GO:0016787; GO:0016791; GO:0016311; GO:0006470; GO:0016021; GO:0016020; GO:0004721; GO:0035335; GO:0004725	protein tyrosine phosphatase activity; peptidyl-tyrosine dephosphorylation; phosphatase activity; hydrolase activity; membrane; phosphoprotein phosphatase activity; dephosphorylation; protein dephosphorylation; integral component of membrane	protein_coding
WBGene00009951	F53A2.3	III:13336900-13339760	N2	rnp-6	OK	9.26721	6.60876	-0.487755	-1.59662	0.00605	0.0406593	yes			protein_coding
WBGene00011474	aldo-1	III:13563340-13564990	N2	rnp-6	OK	30.6095	55.2207	0.85123	3.98426	5e-05	0.000725861	yes	GO:0005737; GO:0005720; GO:0005783; GO:0030017; GO:0016829; GO:0003824; GO:0055120; GO:0004332; GO:0006096; GO:0042802	lyase activity; cytoplasm; fructose-bisphosphate aldolase activity; striated muscle dense body; endoplasmic reticulum; glycolytic process; identical protein binding; catalytic activity; sarcomere; nuclear heterochromatin	protein_coding
WBGene00011733	T12D8.5	III:13625969-13626750	N2	rnp-6	OK	297.327	208.217	-0.513965	-2.53209	5e-05	0.000725861	yes			protein_coding
WBGene00019300	swt-1	IV:307504-311235	N2	rnp-6	OK	17.8934	28.8539	0.689339	2.91981	5e-05	0.000725861	yes	GO:0005794; GO:0006810; GO:0051119; GO:0016021; GO:0016020; GO:0000139; GO:0005886; GO:0008643; GO:0034219	Golgi apparatus; carbohydrate transmembrane transport; Golgi membrane; plasma membrane; membrane; sugar transmembrane transporter activity; integral component of membrane; transport; carbohydrate transport	protein_coding
WBGene00018256	cutl-28	IV:684496-688339	N2	rnp-6	OK	0.903515	0.194594	-2.21508	-3.49668	5e-05	0.000725861	yes	GO:0006508; GO:0016021; GO:0016020; GO:0005515; GO:0005576	extracellular region; protein binding; proteolysis; integral component of membrane; membrane	protein_coding
WBGene00021938	Y55F3BR.1	IV:874600-881909	N2	rnp-6	OK	12.9214	18.5013	0.517864	2.31615	5e-05	0.000725861	yes	GO:0005737; GO:0005515; GO:0005730; GO:0004004; GO:0003676; GO:0010501; GO:0005524	nucleic acid binding; nucleolus; ATP-dependent RNA helicase activity; cytoplasm; ATP binding; protein binding; RNA secondary structure unwinding	protein_coding
WBGene00007007	mak-2	IV:885345-890187	N2	rnp-6	OK	27.8744	35.2725	0.339605	1.5708	0.00555	0.0380172	yes	GO:0018105; GO:0004871; GO:0016310; GO:0051019; GO:1905606; GO:0045202; GO:0007166; GO:0048841; GO:0046777; GO:0030054; GO:0005737; GO:0043204; GO:0005634; GO:0000165; GO:1905870; GO:0000166; GO:0004674; GO:0016740; GO:0004672; GO:0046872; GO:0005524; GO:0006468; GO:0016301; GO:1905868; GO:0004683; GO:0048691; GO:0035095; GO:0009931; GO:0005516	cytoplasm; nucleotide binding; cell junction; cell surface receptor signaling pathway; regulation of 3'-UTR-mediated mRNA stabilization; perikaryon; MAPK cascade; positive regulation of 3'-UTR-mediated mRNA stabilization; protein kinase activity; kinase activity; regulation of presynapse assembly; calmodulin binding; signal transducer activity; ATP binding; protein autophosphorylation; metal ion …	protein_coding
WBGene00021921	Y55F3AM.3	IV:1012651-1019558	N2	rnp-6	OK	50.9904	67.0055	0.394053	1.92402	0.0008	0.00816818	yes	GO:0005634; GO:0003723; GO:0003676; GO:0006397	RNA binding; mRNA processing; nucleus; nucleic acid binding	protein_coding
WBGene00003893	ost-1	IV:1107395-1110856	N2	rnp-6	OK	117.255	167.861	0.517618	2.68059	5e-05	0.000725861	yes	GO:0005604; GO:0005615; GO:0050840; GO:0048856; GO:0005578; GO:0005576; GO:0005518; GO:0005509; GO:0005515; GO:0046872; GO:0007275; GO:0007165	calcium ion binding; extracellular space; extracellular matrix binding; extracellular region; protein binding; signal transduction; basement membrane; metal ion binding; anatomical structure development; proteinaceous extracellular matrix; collagen binding; multicellular organism development	protein_coding
WBGene00022307	Y77E11A.2	IV:1457074-1459525	N2	rnp-6	OK	31.4298	41.9312	0.415893	1.91432	0.0005	0.00551085	yes	GO:0003951; GO:0016310; GO:0006741; GO:0008152; GO:0019674	metabolic process; NAD metabolic process; NADP biosynthetic process; NAD+ kinase activity; phosphorylation	protein_coding
WBGene00019368	K03H6.2	IV:1510563-1515302	N2	rnp-6	OK	3.80287	1.02834	-1.88678	-2.7124	5e-05	0.000725861	yes	; GO:0016787; GO:0006629	hydrolase activity; ; lipid metabolic process	protein_coding
WBGene00001105	dsl-3	IV:1610418-1612915	N2	rnp-6	OK	11.6959	5.8778	-0.992657	-2.98622	5e-05	0.000725861	yes	GO:0005515; GO:0016021; GO:0016020; GO:0005887; GO:0007154; GO:0001708; GO:0007275; GO:0000003	integral component of plasma membrane; protein binding; cell communication; cell fate specification; reproduction; membrane; multicellular organism development; integral component of membrane	protein_coding
WBGene00021525	Y41D4B.26	IV:1631950-1633257	N2	rnp-6	OK	8.57729	3.93425	-1.12443	-2.80853	5e-05	0.000725861	yes	GO:0001708; GO:0000003; GO:0005887	integral component of plasma membrane; cell fate specification; reproduction	protein_coding
WBGene00021513	Y41D4B.6	IV:1633771-1637367	N2	rnp-6	OK	2.28277	0.430471	-2.4068	-3.93537	5e-05	0.000725861	yes	GO:0001708; GO:0000003; GO:0005887	integral component of plasma membrane; cell fate specification; reproduction	protein_coding
WBGene00019537	K08D12.3	IV:1710264-1711141	N2	rnp-6	OK	249.663	320.975	0.362483	1.83511	0.0018	0.0156835	yes	GO:0008270; GO:0003676	nucleic acid binding; zinc ion binding	protein_coding
WBGene00019540	K08D12.6	IV:1720789-1723069	N2	rnp-6	OK	0.631876	1.57793	1.32032	2.99763	5e-05	0.000725861	yes			protein_coding
WBGene00021505	Y41D4A.3	IV:1752456-1761568	N2	rnp-6	OK	4.82437	2.19724	-1.13465	-2.18321	0.0015	0.0135324	yes			protein_coding
WBGene00019462	K07A9.3	IV:1834625-1846978	N2	rnp-6	OK	3.86653	2.15382	-0.844139	-1.82444	0.00355	0.0268498	yes			protein_coding
WBGene00022297	Y76B12C.3	IV:1973705-1975676	N2	rnp-6	OK	77.6807	55.8324	-0.476454	-2.06238	0.0003	0.00356315	yes			protein_coding
WBGene00016670	ilys-3	IV:2464470-2465440	N2	rnp-6	OK	16.4699	7.99796	-1.04213	-2.58475	5e-05	0.000725861	yes	GO:0019835; GO:0016787; GO:0043202; GO:0005615; GO:0003796; GO:0007586; GO:0016798; GO:0005764; GO:0003824; GO:0050830; GO:0005576; GO:0034777; GO:0042742; GO:0008152; GO:0031906; GO:0008340; GO:0005768	hydrolase activity, acting on glycosyl bonds; endosome; defense response to bacterium; late endosome lumen; extracellular space; extracellular region; catalytic activity; lysosome; metabolic process; hydrolase activity; recycling endosome lumen; digestion; lysozyme activity; determination of adult lifespan; lysosomal lumen; cytolysis; defense response to Gram-positive bacterium	protein_coding
WBGene00016669	ilys-2	IV:2467680-2468879	N2	rnp-6	OK	63.196	39.2368	-0.687624	-2.65026	5e-05	0.000725861	yes	GO:0019835; GO:0016787; GO:0003824; GO:0016798; GO:0003796; GO:0050830; GO:0042742; GO:0008152	hydrolase activity, acting on glycosyl bonds; hydrolase activity; catalytic activity; defense response to bacterium; metabolic process; lysozyme activity; cytolysis; defense response to Gram-positive bacterium	protein_coding
WBGene00004878	smf-3	IV:2619874-2625505	N2	rnp-6	OK	7.07978	4.78973	-0.563759	-1.96379	0.0008	0.00816818	yes	GO:0000041; GO:0006810; GO:0046915; GO:0016324; GO:0031410; GO:0016021; GO:0016020; GO:0005215; GO:0005622; GO:0055071; GO:0030659; GO:0055072; GO:0006979; GO:0010038; GO:0005886; GO:0010042; GO:0006811	cytoplasmic vesicle; apical plasma membrane; response to manganese ion; cytoplasmic vesicle membrane; transporter activity; intracellular; transition metal ion transport; ion transport; transition metal ion transmembrane transporter activity; plasma membrane; membrane; manganese ion homeostasis; response to metal ion; response to oxidative stress; integral component of membrane; transport; iron i…	protein_coding
WBGene00021895	clec-84	IV:2842473-2845595	N2	rnp-6	OK	26.9375	36.8437	0.451802	1.8548	0.00085	0.00858204	yes	GO:0030246	carbohydrate binding	protein_coding
WBGene00021898	Y54G2A.36	IV:2896967-2901648	N2	rnp-6	OK	62.3467	30.5378	-1.02972	-4.31627	5e-05	0.000725861	yes	GO:0016021; GO:0016020	integral component of membrane; membrane	protein_coding
WBGene00001692	grd-3	IV:3439654-3440456	N2	rnp-6	OK	40.1651	28.3596	-0.502106	-1.99847	0.00095	0.00937283	yes	GO:0050829; GO:0007267; GO:0005102; GO:0005576	extracellular region; cell-cell signaling; defense response to Gram-negative bacterium; receptor binding	protein_coding
WBGene00015035	otpl-1	IV:3568978-3577630	N2	rnp-6	OK	0.474722	0.895512	0.915629	1.83182	0.0017	0.0149637	yes	GO:0016021; GO:0016020	integral component of membrane; membrane	protein_coding
WBGene00018971	clec-67	IV:3922164-3925045	N2	rnp-6	OK	4.36953	1.72429	-1.34148	-3.86056	5e-05	0.000725861	yes	GO:0045087; GO:0030246	innate immune response; carbohydrate binding	protein_coding
WBGene00018547	clec-78	IV:3989101-4014221	N2	rnp-6	OK	1.59987	0.705712	-1.18081	-3.71774	5e-05	0.000725861	yes	GO:0016021; GO:0016020; GO:0030246; GO:0050830; GO:0005509; GO:0005515	calcium ion binding; carbohydrate binding; protein binding; membrane; defense response to Gram-positive bacterium; integral component of membrane	protein_coding
WBGene00004157	pqn-75	IV:4072326-4077636	N2	rnp-6	OK	4.3472	7.64572	0.814565	2.28135	5e-05	0.000725861	yes			protein_coding
WBGene00018643	drd-50	IV:4117787-4119179	N2	rnp-6	OK	2.7193	0.218973	-3.63441	-4.1424	5e-05	0.000725861	yes	GO:0045087; GO:0050830	innate immune response; defense response to Gram-positive bacterium	protein_coding
WBGene00019932	R07C12.2	IV:4148140-4150055	N2	rnp-6	OK	5.97484	9.39584	0.653123	2.13726	0.00035	0.00407043	yes
WBGene00019931	R07C12.1	IV:4152546-4154029	N2	rnp-6	OK	0.950221	2.06252	1.11808	2.04908	0.0009	0.00897191	yes	GO:0045087	innate immune response	protein_coding
WBGene00219216	K08D10.14	IV:4155272-4157132	N2	rnp-6	OK	1.88578	3.81143	1.01517	2.16779	0.00035	0.00407043	yes	GO:0045087	innate immune response	protein_coding
WBGene00017934	F30B5.4	IV:4205974-4218248	N2	rnp-6	OK	32.7277	20.0141	-0.709493	-3.21175	5e-05	0.000725861	yes	GO:0005575; GO:0003674; GO:0055114; GO:0016491	molecular_function; cellular_component; oxidation-reduction process; oxidoreductase activity	protein_coding
WBGene00001074	dpy-13	IV:4235613-4236706	N2	rnp-6	OK	0.135086	1.32674	3.29593	3.03634	0.0015	0.0135324	yes	GO:0060102; GO:0005581; GO:0042338; GO:0042302	cuticle development involved in collagen and cuticulin-based cuticle molting cycle; structural constituent of cuticle; collagen and cuticulin-based cuticle extracellular matrix; collagen trimer	protein_coding
WBGene00017482	set-9	IV:4307895-4317260	N2	rnp-6	OK	6.83138	10.7026	0.647717	2.98166	5e-05	0.000725861	yes	GO:0018024; GO:0032259; GO:0005634; GO:0003682; GO:0034968; GO:0016740; GO:0008270; GO:0005515; GO:0008340; GO:0007076; GO:0008168; GO:0046872	chromatin binding; methylation; transferase activity; mitotic chromosome condensation; zinc ion binding; histone lysine methylation; methyltransferase activity; nucleus; metal ion binding; protein binding; histone-lysine N-methyltransferase activity; determination of adult lifespan	protein_coding
WBGene00020976	oac-51	IV:4336793-4341304	N2	rnp-6	OK	1.01813	0.256146	-1.99088	-2.82307	0.00015	0.00195025	yes	GO:0016021; GO:0016020; GO:0033692; GO:0016740; GO:0016746; GO:0016747	cellular polysaccharide biosynthetic process; transferase activity; transferase activity, transferring acyl groups; membrane; transferase activity, transferring acyl groups other than amino-acyl groups; integral component of membrane	protein_coding
WBGene00018898	F55F10.1	IV:4360834-4386540	N2	rnp-6	OK	31.2864	41.3374	0.401915	2.12504	0.0004	0.00457121	yes	; GO:0005634; GO:0030687; GO:0006364; GO:0016887; GO:0005524; GO:0000027	; rRNA processing; preribosome, large subunit precursor; nucleus; ATP binding; ribosomal large subunit assembly; ATPase activity	protein_coding
WBGene00020677	T22B11.3	IV:4682952-4685109	N2	rnp-6	OK	1.01276	2.47399	1.28855	2.62677	5e-05	0.000725861	yes
WBGene00017116	fbxb-78	IV:4737557-4738734	N2	rnp-6	OK	2.59841	1.34371	-0.951403	-1.98513	0.00205	0.0174119	yes			protein_coding
WBGene00021199	Y17G9B.2	IV:4764200-4764550	N2	rnp-6	OK	40.0444	17.9714	-1.15589	-1.84601	0.00395	0.0292687	yes			protein_coding
WBGene00020004	R11E3.2	IV:4772091-4775189	N2	rnp-6	OK	0.584495	0.251635	-1.21586	-1.7653	0.00565	0.0385456	yes	GO:0005215; GO:0016021; GO:0016020; GO:0055085; GO:0006810	transporter activity; transmembrane transport; integral component of membrane; transport; membrane	protein_coding
WBGene00021178	Y9C9A.8	IV:4930364-4932217	N2	rnp-6	OK	1.32925	0.714002	-0.896613	-1.64433	0.00725	0.0466777	yes	GO:0005515	protein binding	protein_coding
WBGene00006051	ssq-2	IV:4996141-4997553	N2	rnp-6	OK	0.540896	1.13869	1.07396	1.80877	0.00245	0.0200889	yes			protein_coding
WBGene00006053	ssq-4	IV:5016480-5017762	N2	rnp-6	OK	1.02131	2.20051	1.10742	2.20798	0.0002	0.00250605	yes			protein_coding
WBGene00003450	msp-57	IV:5062542-5062997	N2	rnp-6	OK	2.76042	5.71167	1.04903	1.8909	0.00185	0.016033	yes	GO:0005856; GO:0005737; GO:0042995; GO:0031143	cytoplasm; cytoskeleton; cell projection; pseudopodium	protein_coding
WBGene00021993	Y59E9AL.3	IV:5218831-5220165	N2	rnp-6	OK	0.277956	1.05603	1.92572	2.47168	0.0003	0.00356315	yes			protein_coding
WBGene00016953	C55C3.3	IV:5685292-5688304	N2	rnp-6	OK	3.54976	8.29264	1.22411	4.07968	5e-05	0.000725861	yes	GO:0016021; GO:0016020	integral component of membrane; membrane	protein_coding
WBGene00019154	glf-1	IV:5885834-5889805	N2	rnp-6	OK	1.34369	0.172889	-2.95828	-3.90064	5e-05	0.000725861	yes	GO:0005737; GO:0008767; GO:0016853; GO:0033692; GO:0055114; GO:0016491	cellular polysaccharide biosynthetic process; UDP-galactopyranose mutase activity; cytoplasm; oxidoreductase activity; isomerase activity; oxidation-reduction process	protein_coding
WBGene00016759	C49A9.5	IV:6213821-6216365	N2	rnp-6	OK	3.55197	5.42719	0.611587	1.94547	0.00085	0.00858204	yes			protein_coding
WBGene00000256	bli-6	IV:6377093-6378195	N2	rnp-6	OK	0.37354	1.16701	1.64348	2.22726	0.00175	0.015327	yes	GO:0016021; GO:0016020; GO:0042302	structural constituent of cuticle; integral component of membrane; membrane	protein_coding
WBGene00001858	hil-7	IV:6646033-6646939	N2	rnp-6	OK	25.7334	8.32824	-1.62756	-4.39055	5e-05	0.000725861	yes	; GO:0006334; GO:0000786; GO:0003677	; nucleosome; DNA binding; nucleosome assembly	protein_coding
WBGene00219822	C17H12.36	IV:6792973-6793200	N2	rnp-6	OK	10.4073	20.5265	0.979889	1.72297	0.0029	0.0228734	yes
WBGene00015934	ceh-48	IV:6812107-6815581	N2	rnp-6	OK	1.30594	0.634742	-1.04085	-2.12846	0.0008	0.00816818	yes	GO:0005634; GO:0030154; GO:0006355; GO:0001077; GO:0045944; GO:0006351; GO:0006366; GO:0048731; GO:0003677	regulation of transcription, DNA-templated; DNA binding; cell differentiation; transcriptional activator activity, RNA polymerase II proximal promoter sequence-specific DNA binding; nucleus; transcription from RNA polymerase II promoter; positive regulation of transcription from RNA polymerase II promoter; transcription, DNA-templated; system development	protein_coding
WBGene00019215	H20E11.3	IV:6824893-6826761	N2	rnp-6	OK	3.55527	2.21581	-0.682126	-1.68118	0.00385	0.0286865	yes	GO:0050829; GO:0045087; GO:0045121	innate immune response; membrane raft; defense response to Gram-negative bacterium	protein_coding
WBGene00195050	T22D1.17	IV:6905659-6906390	N2	rnp-6	OK	0.626784	7.9199	3.65944	3.62102	0.00075	0.00772691	yes			protein_coding
WBGene00016084	cht-3	IV:7003624-7009269	N2	rnp-6	OK	101.143	60.4046	-0.743668	-3.95301	5e-05	0.000725861	yes	GO:0005737; GO:0016787; GO:0005975; GO:0016798; GO:0000272; GO:0005576; GO:0008061; GO:0008152; GO:0004553; GO:0004568; GO:0006032	hydrolase activity, acting on glycosyl bonds; hydrolase activity, hydrolyzing O-glycosyl compounds; extracellular region; cytoplasm; carbohydrate metabolic process; metabolic process; hydrolase activity; polysaccharide catabolic process; chitinase activity; chitin binding; chitin catabolic process	protein_coding
WBGene00015552	C06G3.6	IV:7017625-7020202	N2	rnp-6	OK	27.122	21.4683	-0.33726	-1.54809	0.0069	0.0450085	yes	GO:0005776; GO:0016235; GO:0043130; GO:0008270; GO:0005515; GO:0006511; GO:0046872; GO:0042802	aggresome; protein binding; identical protein binding; zinc ion binding; metal ion binding; ubiquitin binding; ubiquitin-dependent protein catabolic process; autophagosome	protein_coding
WBGene00006504	kcc-1	IV:7206268-7217980	N2	rnp-6	OK	28.6231	36.0719	0.333695	1.73066	0.003	0.0235082	yes	GO:0006810; GO:0071805; GO:0006813; GO:0005215; GO:0016021; GO:0016020; GO:0055085; GO:0006821; GO:0007268; GO:1902476; GO:0015379; GO:0022820; GO:0006811	transporter activity; chloride transmembrane transport; chloride transport; chemical synaptic transmission; potassium ion transmembrane transport; integral component of membrane; ion transport; potassium ion symporter activity; potassium:chloride symporter activity; membrane; potassium ion transport; transmembrane transport; transport	protein_coding
WBGene00017051	afmd-1	IV:7244223-7245503	N2	rnp-6	OK	1.9099	0.959961	-0.992446	-1.80712	0.00425	0.0309824	yes	GO:0005737; GO:0016787; GO:0016272; GO:0019441; GO:0008152; GO:0004061	arylformamidase activity; hydrolase activity; cytoplasm; prefoldin complex; tryptophan catabolic process to kynurenine; metabolic process	protein_coding
WBGene00020446	T12B3.3	IV:7375171-7376638	N2	rnp-6	OK	56.8428	43.973	-0.37036	-1.75071	0.00225	0.0187814	yes	GO:0016021; GO:0016020; GO:0008889; GO:0006629; GO:0008081	phosphoric diester hydrolase activity; glycerophosphodiester phosphodiesterase activity; integral component of membrane; lipid metabolic process; membrane	protein_coding
WBGene00016845	C50F7.5	IV:7726717-7727951	N2	rnp-6	OK	100.869	220.569	1.12875	5.74012	5e-05	0.000725861	yes			protein_coding
WBGene00016698	C46A5.1	IV:7763930-7767115	N2	rnp-6	OK	1.98746	1.14161	-0.79986	-1.8699	0.00225	0.0187814	yes	GO:0016311; GO:0006470; GO:0004725; GO:0016791; GO:0035335	protein tyrosine phosphatase activity; peptidyl-tyrosine dephosphorylation; protein dephosphorylation; phosphatase activity; dephosphorylation	protein_coding
WBGene00015048	faah-2	IV:8152444-8154859	N2	rnp-6	OK	64.7617	34.4738	-0.909643	-4.49579	5e-05	0.000725861	yes	GO:0016787; GO:0016884; GO:0004040	hydrolase activity; amidase activity; carbon-nitrogen ligase activity, with glutamine as amido-N-donor	protein_coding
WBGene00018068	F35H10.2	IV:8329224-8329866	N2	rnp-6	OK	2.81251	1.12937	-1.31633	-1.93579	0.00295	0.0231897	yes			protein_coding
WBGene00001906	his-32	IV:8334297-8334765	N2	rnp-6	OK	636.078	510.862	-0.316272	-1.63956	0.0045	0.0323767	yes	GO:0005634; GO:0003677; GO:0031492; GO:0000786; GO:0046982; GO:0005694; GO:0006334	nucleosome; DNA binding; protein heterodimerization activity; nucleosome assembly; nucleus; nucleosomal DNA binding; chromosome	protein_coding
WBGene00001908	his-34	IV:8335971-8336340	N2	rnp-6	OK	33.1103	5.6284	-2.55648	-5.38916	5e-05	0.000725861	yes	GO:0000786; GO:0005634; GO:0005811; GO:0000785; GO:0035267; GO:0003677; GO:0046982; GO:0005694; GO:0006334	nucleosome; chromatin; DNA binding; lipid droplet; NuA4 histone acetyltransferase complex; protein heterodimerization activity; nucleosome assembly; nucleus; chromosome	protein_coding
WBGene00017541	F17E9.4	IV:8348372-8349170	N2	rnp-6	OK	169.909	73.7431	-1.20418	-5.418	5e-05	0.000725861	yes			protein_coding
WBGene00017071	aagr-1	IV:8366538-8375372	N2	rnp-6	OK	26.1724	15.6309	-0.743651	-3.50098	5e-05	0.000725861	yes	GO:0016787; GO:0005975; GO:0005980; GO:0030246; GO:0016798; GO:0005764; GO:0003824; GO:0008152; GO:0004553; GO:0004558	hydrolase activity, acting on glycosyl bonds; carbohydrate binding; hydrolase activity, hydrolyzing O-glycosyl compounds; hydrolase activity; catalytic activity; carbohydrate metabolic process; alpha-1,4-glucosidase activity; glycogen catabolic process; metabolic process; lysosome	protein_coding
WBGene00019788	M116.1	IV:8410577-8412167	N2	rnp-6	OK	1.0235	0.0597768	-4.09778	-2.37667	0.0075	0.0478343	yes	GO:0005515	protein binding	protein_coding
WBGene00004993	spp-8	IV:8481663-8483710	N2	rnp-6	OK	75.959	56.5938	-0.424576	-2.11161	0.0001	0.00135972	yes	GO:0005737; GO:0001664; GO:0008047; GO:0043085	cytoplasm; positive regulation of catalytic activity; enzyme activator activity; G-protein coupled receptor binding	protein_coding
WBGene00016180	C28C12.4	IV:8487496-8488423	N2	rnp-6	OK	3.64736	7.01072	0.94271	2.5073	5e-05	0.000725861	yes			protein_coding
WBGene00018335	F42A9.6	IV:8609238-8611490	N2	rnp-6	OK	13.5206	35.0893	1.37588	4.75609	5e-05	0.000725861	yes	GO:0016021; GO:0016020	integral component of membrane; membrane	protein_coding
WBGene00000397	cdh-5	IV:8669141-8676542	N2	rnp-6	OK	1.36811	2.55773	0.902673	3.02359	5e-05	0.000725861	yes	GO:0016021; GO:0016020; GO:0005509; GO:0005886; GO:0007155; GO:0007156	calcium ion binding; homophilic cell adhesion via plasma membrane adhesion molecules; membrane; cell adhesion; integral component of membrane; plasma membrane	protein_coding
WBGene00255375	F08B4.8	IV:8677602-8678019	N2	rnp-6	OK	1.35184	4.12595	1.6098	2.1698	0.0006	0.00643061	yes			protein_coding
WBGene00009008	F21D5.3	IV:8730720-8735685	N2	rnp-6	OK	22.8634	15.8887	-0.525035	-2.07678	0.00025	0.00303907	yes	; GO:0033215; GO:0004322; GO:0005381; GO:0006826; GO:0033573; GO:0005507; GO:0034755; GO:0055114; GO:0016491	; iron ion transmembrane transporter activity; ferroxidase activity; high-affinity iron permease complex; oxidoreductase activity; iron assimilation by reduction and transport; copper ion binding; oxidation-reduction process; iron ion transmembrane transport; iron ion transport	protein_coding
WBGene00045183	T28C6.10	IV:8818647-8819130	N2	rnp-6	OK	4.13928	1.64306	-1.33299	-2.00289	0.00215	0.018108	yes			protein_coding
WBGene00012119	T28C6.3	IV:8820355-8821239	N2	rnp-6	OK	4.90247	2.59102	-0.919987	-1.99815	0.0019	0.0163938	yes	GO:0016021; GO:0016020	integral component of membrane; membrane	protein_coding
WBGene00011706	T11B7.1	IV:8840724-8842805	N2	rnp-6	OK	14.0204	9.40311	-0.576318	-2.23512	5e-05	0.000725861	yes	GO:0005515	protein binding	protein_coding
WBGene00006941	wnk-1	IV:9200115-9212232	N2	rnp-6	OK	51.0746	64.5467	0.337735	1.77459	0.00245	0.0200889	yes	; GO:0006468; GO:0006972; GO:0000122; GO:0016310; GO:0005829; GO:0016301; GO:0050891; GO:0000166; GO:0004674; GO:0016740; GO:0005515; GO:0004672; GO:0035556; GO:0061404; GO:0007275; GO:0005524	; negative regulation of transcription from RNA polymerase II promoter; intracellular signal transduction; protein phosphorylation; cytosol; transferase activity; phosphorylation; protein kinase activity; kinase activity; multicellular organismal water homeostasis; positive regulation of transcription from RNA polymerase II promoter in response to increased salt; ATP binding; protein binding; hyp…	protein_coding
WBGene00008110	C46C2.2	IV:9216951-9220397	N2	rnp-6	OK	33.3471	23.4951	-0.5052	-2.35788	5e-05	0.000725861	yes	GO:0008514; GO:0005215; GO:0016021; GO:0016020; GO:0015711; GO:0022857; GO:0005887; GO:0055085	transporter activity; integral component of plasma membrane; organic anion transport; organic anion transmembrane transporter activity; integral component of membrane; transmembrane transporter activity; membrane; transmembrane transport	protein_coding
WBGene00008111	C46C2.3	IV:9225124-9227934	N2	rnp-6	OK	0.16333	0.61601	1.91516	2.07473	0.00325	0.0250162	yes			protein_coding
WBGene00007507	C10C5.3	IV:9374764-9376492	N2	rnp-6	OK	11.0936	20.9162	0.914891	3.65906	5e-05	0.000725861	yes	GO:0005737; GO:0016787; GO:0006520; GO:0004046; GO:0008152; GO:0006508; GO:0008237	cellular amino acid metabolic process; aminoacylase activity; hydrolase activity; cytoplasm; metabolic process; metallopeptidase activity; proteolysis	protein_coding
WBGene00007508	C10C5.4	IV:9378602-9380450	N2	rnp-6	OK	24.6032	31.4238	0.353012	1.57357	0.00605	0.0406593	yes	GO:0005737; GO:0016787; GO:0006520; GO:0004046; GO:0008152; GO:0006508; GO:0008237	cellular amino acid metabolic process; aminoacylase activity; hydrolase activity; cytoplasm; metabolic process; metallopeptidase activity; proteolysis	protein_coding
WBGene00000775	cpin-1	IV:9449588-9457501	N2	rnp-6	OK	6.37293	4.07304	-0.645851	-1.97701	0.0006	0.00643061	yes	GO:0016787; GO:0016810	hydrolase activity; hydrolase activity, acting on carbon-nitrogen (but not peptide) bonds	protein_coding
WBGene00005003	spp-18	IV:9593692-9594425	N2	rnp-6	OK	73.5018	44.5314	-0.722956	-2.85598	5e-05	0.000725861	yes	; GO:0045087	; innate immune response	protein_coding
WBGene00001396	fat-4	IV:9799428-9802231	N2	rnp-6	OK	207.753	166.261	-0.321422	-1.70027	0.00365	0.0274633	yes	GO:0006633; ; GO:0006631; GO:0006629; GO:0016021; GO:0016020; GO:0006636; GO:0004768; GO:0055114; GO:0016491	; unsaturated fatty acid biosynthetic process; fatty acid metabolic process; oxidoreductase activity; fatty acid biosynthetic process; stearoyl-CoA 9-desaturase activity; oxidation-reduction process; lipid metabolic process; membrane; integral component of membrane	protein_coding
WBGene00001395	fat-3	IV:9803025-9806121	N2	rnp-6	OK	149.739	114.912	-0.381925	-1.67609	0.00325	0.0250162	yes	GO:0006633; ; GO:0006631; GO:0008104; GO:0006636; GO:0030421; GO:0014055; GO:0035264; GO:0016491; GO:0040002; GO:0016021; GO:0016020; GO:0001820; GO:0006629; GO:0006936; GO:0055114; GO:0040011; GO:0018991; GO:0043050; GO:0045088; GO:0005622; GO:0098793; GO:0032456; GO:0004768	; multicellular organism growth; protein localization; acetylcholine secretion, neurotransmission; serotonin secretion; stearoyl-CoA 9-desaturase activity; collagen and cuticulin-based cuticle development; fatty acid metabolic process; intracellular; fatty acid biosynthetic process; pharyngeal pumping; oxidation-reduction process; membrane; endocytic recycling; lipid metabolic process; oxidoreduc…	protein_coding
WBGene00010633	nspd-2	IV:9844028-9844337	N2	rnp-6	OK	4.02593	9.00182	1.16089	1.84477	0.00275	0.0219448	yes			protein_coding
WBGene00003464	msp-77	IV:9894595-9895033	N2	rnp-6	OK	2.0337	5.81901	1.51667	2.49118	0.0002	0.00250605	yes	GO:0005856; GO:0005737; GO:0042995; GO:0031143; GO:0043410; GO:0045987; GO:0001556	positive regulation of smooth muscle contraction; pseudopodium; cytoplasm; positive regulation of MAPK cascade; cytoskeleton; cell projection; oocyte maturation	protein_coding
WBGene00000858	cwn-2	IV:10067823-10070181	N2	rnp-6	OK	5.67986	3.33574	-0.76785	-2.27599	0.00025	0.00303907	yes	GO:0040025; GO:0010084; GO:0033564; GO:0005615; GO:0007399; GO:0060573; GO:0009948; GO:1905485; GO:0016055; GO:1904936; GO:0007275; GO:0005109; GO:0005576; GO:0001764; GO:0097475; GO:0009792; GO:0097402; GO:0005102; GO:1904937; GO:0005578	neuroblast migration; Wnt signaling pathway; positive regulation of motor neuron migration; embryo development ending in birth or egg hatching; anterior/posterior axon guidance; motor neuron migration; receptor binding; extracellular region; neuron migration; specification of animal organ axis polarity; vulval development; extracellular space; interneuron migration; anterior/posterior axis specif…	protein_coding
WBGene00003432	msp-36	IV:10095399-10095851	N2	rnp-6	OK	3.4819	6.43857	0.886865	1.68492	0.0038	0.0283741	yes	GO:0005856; GO:0005737; GO:0042995; GO:0031143	cytoplasm; cytoskeleton; cell projection; pseudopodium	protein_coding
WBGene00007308	C04G2.9	IV:10112890-10114231	N2	rnp-6	OK	1.38363	2.58902	0.90395	1.99077	0.00095	0.00937283	yes			protein_coding
WBGene00011774	ttr-54	IV:10156122-10156771	N2	rnp-6	OK	22.746	14.1514	-0.68467	-2.16018	0.0005	0.00551085	yes	GO:0005615	extracellular space	protein_coding
WBGene00001794	gta-1	IV:10180659-10194424	N2	rnp-6	OK	113.2	88.5906	-0.353654	-1.80801	0.00165	0.0145952	yes	GO:0042135; GO:0008483; GO:0047298; GO:0005739; GO:0003824; GO:0016740; GO:0030170; GO:0005759; GO:0003867; GO:0009448	pyridoxal phosphate binding; (S)-3-amino-2-methylpropionate transaminase activity; 4-aminobutyrate transaminase activity; transferase activity; mitochondrial matrix; transaminase activity; catalytic activity; mitochondrion; neurotransmitter catabolic process; gamma-aminobutyric acid metabolic process	protein_coding
WBGene00000698	col-124	IV:10214983-10219308	N2	rnp-6	OK	639.851	863.227	0.432003	2.04169	0.00085	0.00858204	yes	GO:0016021; GO:0016020; GO:0005581; GO:0042302	structural constituent of cuticle; collagen trimer; integral component of membrane; membrane	protein_coding
WBGene00012782	Y43C5A.2	IV:10269882-10272698	N2	rnp-6	OK	59.6166	31.1356	-0.937146	-4.44245	5e-05	0.000725861	yes			protein_coding
WBGene00012783	Y43C5A.3	IV:10274035-10275411	N2	rnp-6	OK	67.1354	44.7409	-0.585481	-2.54076	5e-05	0.000725861	yes	GO:0050829; GO:0003690; GO:0031640	double-stranded DNA binding; killing of cells of other organism; defense response to Gram-negative bacterium	protein_coding
WBGene00011222	R10H10.3	IV:10388492-10393294	N2	rnp-6	OK	56.9819	29.2814	-0.960521	-4.32831	5e-05	0.000725861	yes			protein_coding
WBGene00008485	ugt-43	IV:10464658-10467240	N2	rnp-6	OK	2.10489	1.1957	-0.815887	-1.92619	0.0015	0.0135324	yes	GO:0043231; GO:0016021; GO:0016020; GO:0016740; GO:0008152; GO:0016758; GO:0015020	transferase activity; membrane; integral component of membrane; metabolic process; glucuronosyltransferase activity; intracellular membrane-bounded organelle; transferase activity, transferring hexosyl groups	protein_coding
WBGene00011599	T07G12.8	IV:10547087-10555442	N2	rnp-6	OK	22.9705	44.5192	0.954642	1.64997	0.0073	0.0469136	yes
WBGene00011181	R09H10.3	IV:10606953-10609855	N2	rnp-6	OK	26.7245	17.5373	-0.607735	-1.91359	0.0009	0.00897191	yes	; GO:0016787; GO:0033971; GO:0005515; GO:0006144; GO:0042802	; hydrolase activity; protein binding; identical protein binding; purine nucleobase metabolic process; hydroxyisourate hydrolase activity	protein_coding
WBGene00010646	K08C7.1	IV:10656873-10660783	N2	rnp-6	OK	2.98897	5.46331	0.870128	2.70797	5e-05	0.000725861	yes	GO:0022857; GO:0016021; GO:0016020; GO:0006820; GO:0055085	anion transport; transmembrane transport; transmembrane transporter activity; integral component of membrane; membrane	protein_coding
WBGene00001476	fmo-1	IV:10661856-10664404	N2	rnp-6	OK	13.0769	23.5937	0.851388	3.7392	5e-05	0.000725861	yes	GO:0004497; GO:0050660; GO:0016021; GO:0016020; GO:0004499; GO:0050661; GO:0055114; GO:0016491	N,N-dimethylaniline monooxygenase activity; flavin adenine dinucleotide binding; monooxygenase activity; NADP binding; oxidation-reduction process; membrane; integral component of membrane; oxidoreductase activity	protein_coding
WBGene00001477	fmo-2	IV:10682523-10684385	N2	rnp-6	OK	703.708	930.198	0.40256	2.11089	0.0003	0.00356315	yes	GO:0005737; GO:0004497; GO:0050660; GO:0016021; GO:0016020; GO:0004499; GO:0050661; GO:0055114; GO:0016491	N,N-dimethylaniline monooxygenase activity; cytoplasm; oxidoreductase activity; monooxygenase activity; flavin adenine dinucleotide binding; NADP binding; oxidation-reduction process; membrane; integral component of membrane	protein_coding
WBGene00003568	ncx-3	IV:10716655-10721755	N2	rnp-6	OK	9.66707	6.74433	-0.519403	-2.12419	0.00015	0.00195025	yes	GO:0006810; GO:0016021; GO:0016020; GO:0006816; GO:0035725; GO:0007154; GO:0005432; GO:0055085	calcium:sodium antiporter activity; integral component of membrane; calcium ion transport; sodium ion transmembrane transport; membrane; cell communication; transmembrane transport; transport	protein_coding
WBGene00014006	ZK596.1	IV:10900371-10901383	N2	rnp-6	OK	30.8458	52.6944	0.772574	3.3013	5e-05	0.000725861	yes			protein_coding
WBGene00014002	ZK593.2	IV:10913360-10914562	N2	rnp-6	OK	9.91628	3.73421	-1.40899	-3.23934	5e-05	0.000725861	yes			protein_coding
WBGene00014003	ZK593.3	IV:10916614-10917692	N2	rnp-6	OK	2.76179	8.78429	1.66932	3.60476	5e-05	0.000725861	yes	GO:0016021; GO:0016020	integral component of membrane; membrane	protein_coding
WBGene00013474	Y69E1A.2	IV:10949816-10951133	N2	rnp-6	OK	0.826411	1.56234	0.918778	1.69557	0.00445	0.0321073	yes			protein_coding
WBGene00014505	T05E11.9	IV:11106417-11107579	N2	rnp-6	OK	91.5532	51.0952	-0.841424	-4.10613	5e-05	0.000725861	yes
WBGene00000699	col-125	IV:11225504-11226519	N2	rnp-6	OK	0.315491	2.29252	2.86126	3.72566	5e-05	0.000725861	yes	GO:0016021; GO:0016020; GO:0005581; GO:0042302	structural constituent of cuticle; collagen trimer; integral component of membrane; membrane	protein_coding
WBGene00044290	B0035.18	IV:11320319-11320643	N2	rnp-6	OK	71.286	35.8617	-0.991174	-2.93319	5e-05	0.000725861	yes	GO:0004129; GO:1902600; GO:0016021; GO:0016020	hydrogen ion transmembrane transport; cytochrome-c oxidase activity; integral component of membrane; membrane	protein_coding
WBGene00001939	his-65	IV:11401091-11401475	N2	rnp-6	OK	51.9112	27.044	-0.940739	-2.90747	5e-05	0.000725861	yes	GO:0006281; GO:0006342; GO:0005634; GO:0000786; GO:0006355; GO:0000790; GO:0003677; GO:0046982; GO:0005694	nuclear chromatin; nucleosome; regulation of transcription, DNA-templated; DNA binding; chromatin silencing; protein heterodimerization activity; nucleus; DNA repair; chromosome	protein_coding
WBGene00045175	C10C6.9	IV:11468394-11468900	N2	rnp-6	OK	17.0685	7.76365	-1.13653	-2.70266	5e-05	0.000725861	yes
WBGene00195005	ZK809.10	IV:11659572-11659673	N2	rnp-6	OK	57.7579	0	-inf		0.00135	0.0124346	yes
WBGene00014076	ZK792.1	IV:11659799-11665203	N2	rnp-6	OK	10.8622	8.11665	-0.420364	-1.59729	0.0061	0.040891	yes	GO:0016311; GO:0016021; GO:0016020; GO:0003993	acid phosphatase activity; dephosphorylation; integral component of membrane; membrane	protein_coding
WBGene00001577	gem-4	IV:11745639-11748685	N2	rnp-6	OK	17.1313	11.6166	-0.560446	-2.38773	5e-05	0.000725861	yes	; GO:0005515	; protein binding	protein_coding
WBGene00011727	T12A7.6	IV:11749219-11751008	N2	rnp-6	OK	10.0944	5.95993	-0.760187	-2.56324	5e-05	0.000725861	yes			protein_coding
WBGene00011726	lpr-2	IV:11779272-11792593	N2	rnp-6	OK	1.79423	0.813327	-1.14146	-2.52922	0.0001	0.00135972	yes	GO:0005215; GO:0044765; GO:0005576; GO:0005501; GO:0006810	extracellular region; transporter activity; single-organism transport; transport; retinoid binding	protein_coding
WBGene00002827	let-653	IV:11885529-11891080	N2	rnp-6	OK	2.71583	1.46736	-0.888174	-2.51422	5e-05	0.000725861	yes	GO:0035150; GO:0098591; GO:0040026; GO:0098592; GO:0099512; GO:0005615; ; GO:0016324; GO:0040018; GO:1903133; GO:0016020; GO:0042302; GO:0048613; GO:0005576; GO:0035017; GO:0005886; GO:1905278; GO:0061063; GO:0009653; GO:0007275; GO:0002064	positive regulation of nematode larval development; extracellular space; positive regulation of multicellular organism growth; cuticle pattern formation; ; epithelial cell development; extracellular region; apical plasma membrane; supramolecular fiber; external side of apical plasma membrane; regulation of tube size; positive regulation of vulval development; cytoplasmic side of apical plasma mem…	protein_coding
WBGene00012163	VZK822L.2	IV:11912026-11913245	N2	rnp-6	OK	1.16054	3.21024	1.46788	1.85759	0.0053	0.0367133	yes	GO:0016021; GO:0016020	integral component of membrane; membrane	protein_coding
WBGene00014095	gdh-1	IV:11953248-11955541	N2	rnp-6	OK	235.718	305.466	0.373954	1.98534	0.00065	0.0068644	yes	GO:0004352; GO:0006520; GO:0016639; GO:0055114; GO:0016491	oxidoreductase activity, acting on the CH-NH2 group of donors, NAD or NADP as acceptor; cellular amino acid metabolic process; glutamate dehydrogenase (NAD+) activity; oxidation-reduction process; oxidoreductase activity	protein_coding
WBGene00000122	aly-3	IV:12123154-12124810	N2	rnp-6	OK	236.423	188.03	-0.330401	-1.72265	0.0028	0.0222533	yes	GO:0003676	nucleic acid binding	protein_coding
WBGene00008584	F08G5.6	IV:12435826-12438274	N2	rnp-6	OK	3.16718	1.46819	-1.10916	-2.48101	5e-05	0.000725861	yes	GO:0050829; GO:0045087; GO:0045121	innate immune response; membrane raft; defense response to Gram-negative bacterium	protein_coding
WBGene00007778	C27D8.2	IV:12712769-12714755	N2	rnp-6	OK	2.63319	0.642814	-2.03434	-4.12717	5e-05	0.000725861	yes			protein_coding
WBGene00007867	C32H11.4	IV:12921287-12923292	N2	rnp-6	OK	1.7343	0.646897	-1.42275	-2.50105	0.0001	0.00135972	yes	GO:0045087	innate immune response	protein_coding
WBGene00010128	F55G11.8	IV:12962807-12964624	N2	rnp-6	OK	4.27879	2.17019	-0.979382	-2.46736	5e-05	0.000725861	yes	GO:0045087	innate immune response	protein_coding
WBGene00010125	dod-22	IV:12965386-12967376	N2	rnp-6	OK	24.5198	8.66844	-1.5001	-5.55339	5e-05	0.000725861	yes	GO:0050829; ; GO:0045087	; innate immune response; defense response to Gram-negative bacterium	protein_coding
WBGene00009895	scl-2	IV:13057677-13059092	N2	rnp-6	OK	135.059	183.558	0.442649	2.03066	0.00055	0.00597832	yes			protein_coding
WBGene00009896	scl-3	IV:13059617-13060695	N2	rnp-6	OK	5.61461	10.2591	0.869652	2.50909	5e-05	0.000725861	yes	GO:0005576	extracellular region	protein_coding
WBGene00008032	C39E9.8	IV:13079479-13082782	N2	rnp-6	OK	41.5391	64.192	0.627921	2.89294	5e-05	0.000725861	yes			protein_coding
WBGene00014941	Y67H2A.9	IV:13320157-13321831	N2	rnp-6	OK	3.73851	17.515	2.22806	7.21972	5e-05	0.000725861	yes
WBGene00001390	far-6	IV:13328358-13329319	N2	rnp-6	OK	86.4674	27.3832	-1.65887	-7.30288	5e-05	0.000725861	yes	GO:0008289	lipid binding	protein_coding
WBGene00003230	mex-5	IV:13353722-13356089	N2	rnp-6	OK	201.719	246.39	0.288598	1.55191	0.00715	0.0462067	yes	GO:0005737; GO:0032880; GO:0043186; GO:0005813; GO:0005829; GO:0019901; GO:0061158; GO:0003730; GO:0003677; GO:0008187; GO:0046872; GO:0007275; GO:0019904	3'-UTR-mediated mRNA destabilization; protein kinase binding; cytosol; cytoplasm; DNA binding; regulation of protein localization; P granule; metal ion binding; protein domain specific binding; mRNA 3'-UTR binding; poly-pyrimidine tract binding; multicellular organism development; centrosome	protein_coding
WBGene00008123	ent-4	IV:13726929-13732723	N2	rnp-6	OK	4.9714	3.45215	-0.526157	-1.60347	0.0057	0.0388114	yes	GO:0016021; GO:0016020; GO:0005337; GO:0006810; GO:1901642	nucleoside transmembrane transporter activity; nucleoside transmembrane transport; integral component of membrane; transport; membrane	protein_coding
WBGene00012538	Y37A1B.5	IV:14051199-14056668	N2	rnp-6	OK	48.2952	61.679	0.352899	1.47003	0.00465	0.03317	yes	GO:0008430; GO:0005515	protein binding; selenium binding	protein_coding
WBGene00171449	Y37A1B.5	IV:14051199-14056668	N2	rnp-6	OK	48.2952	61.679	0.352899	1.47003	0.00465	0.03317	yes
WBGene00047764	Y37A1B.5	IV:14051199-14056668	N2	rnp-6	OK	48.2952	61.679	0.352899	1.47003	0.00465	0.03317	yes
WBGene00049765	Y37A1B.5	IV:14051199-14056668	N2	rnp-6	OK	48.2952	61.679	0.352899	1.47003	0.00465	0.03317	yes
WBGene00009926	noah-2	IV:14091253-14096624	N2	rnp-6	OK	22.4502	14.0055	-0.680731	-2.07635	5e-05	0.000725861	yes	GO:0042335; GO:0016021; GO:0016020; GO:0018996; GO:0002064	epithelial cell development; molting cycle, collagen and cuticulin-based cuticle; integral component of membrane; cuticle development; membrane	protein_coding
WBGene00171562	noah-2	IV:14091253-14096624	N2	rnp-6	OK	22.4502	14.0055	-0.680731	-2.07635	5e-05	0.000725861	yes
WBGene00010085	F55B11.3	IV:14424692-14425859	N2	rnp-6	OK	42.8544	66.4179	0.632128	2.94444	5e-05	0.000725861	yes			protein_coding
WBGene00013292	Y57G11A.4	IV:14482333-14486461	N2	rnp-6	OK	3.23769	1.72797	-0.905886	-1.92791	0.0016	0.014229	yes			protein_coding
WBGene00013306	Y57G11C.1130,Y57G11C.8	IV:14781836-14783395	N2	rnp-6	OK	11.9986	19.427	0.695203	2.42934	5e-05	0.000725861	yes			protein_coding
WBGene00194649	Y57G11C.1130,Y57G11C.8	IV:14781836-14783395	N2	rnp-6	OK	11.9986	19.427	0.695203	2.42934	5e-05	0.000725861	yes			protein_coding
WBGene00013654	Y105C5B.15	IV:15951908-15954841	N2	rnp-6	OK	12.7325	21.072	0.726816	2.95121	5e-05	0.000725861	yes	GO:0016311; GO:0016787; GO:0046872; GO:0003993	hydrolase activity; acid phosphatase activity; metal ion binding; dephosphorylation	protein_coding
WBGene00013119	Y51H4A.25	IV:16736263-16743088	N2	rnp-6	OK	11.8726	18.564	0.644869	2.13844	0.0003	0.00356315	yes	GO:0008375; GO:0016021; GO:0016020; GO:0005515	acetylglucosaminyltransferase activity; protein binding; integral component of membrane; membrane	protein_coding
WBGene00013996	ZK550.2	IV:17245597-17249749	N2	rnp-6	OK	4.44206	6.37192	0.520498	1.75992	0.00195	0.0167396	yes	GO:0016021; GO:0016020; GO:0055085	transmembrane transport; integral component of membrane; membrane	protein_coding
WBGene00000224	atgp-1	IV:17269341-17272184	N2	rnp-6	OK	14.3209	9.87972	-0.535577	-2.20478	0.00015	0.00195025	yes	; GO:0005975; GO:0016021; GO:0016020; GO:0003824; GO:0005886	; catalytic activity; carbohydrate metabolic process; membrane; integral component of membrane; plasma membrane	protein_coding
WBGene00009156	clec-196	IV:17276965-17277747	N2	rnp-6	OK	87.5609	47.4453	-0.88402	-2.32661	0.0001	0.00135972	yes	GO:0030246	carbohydrate binding	protein_coding
WBGene00012131	T28F3.5	IV:17294792-17300488	N2	rnp-6	OK	2.10214	3.66908	0.803556	3.01056	5e-05	0.000725861	yes	GO:0006633; GO:0000166; GO:0003824; GO:0003989; GO:0004075; GO:0046872; GO:0016874; GO:0005524	catalytic activity; fatty acid biosynthetic process; ligase activity; ATP binding; biotin carboxylase activity; acetyl-CoA carboxylase activity; nucleotide binding; metal ion binding	protein_coding
WBGene00023501	F11E6.11	IV:17442874-17443736	N2	rnp-6	OK	15.6235	10.5418	-0.567598	-1.76161	0.00275	0.0219448	yes	GO:0016021; GO:0016020	integral component of membrane; membrane	protein_coding
WBGene00008706	gba-3	IV:17473287-17479386	N2	rnp-6	OK	6.42138	3.94858	-0.701551	-2.24118	0.0001	0.00135972	yes	GO:0016787; GO:0004348; GO:0005764; GO:0006680; GO:0006665; GO:0006629	glucosylceramide catabolic process; lysosome; hydrolase activity; glucosylceramidase activity; lipid metabolic process; sphingolipid metabolic process	protein_coding
WBGene00001099	dsc-4	IV:315052-320576	N2	rnp-6	OK	11.7655	8.50661	-0.467907	-2.00802	0.00055	0.00597832	yes	GO:0030968	endoplasmic reticulum unfolded protein response	protein_coding
WBGene00000675	col-101	IV:325075-330648	N2	rnp-6	OK	68.9577	95.7439	0.47347	2.22379	0.00015	0.00195025	yes	GO:0016021; GO:0016020; GO:0005581; GO:0042302	structural constituent of cuticle; collagen trimer; integral component of membrane; membrane	protein_coding
WBGene00017574	F18F11.1	IV:334802-337178	N2	rnp-6	OK	17.0399	11.224	-0.602333	-1.98308	0.00055	0.00597832	yes	GO:0016021; GO:0016020	integral component of membrane; membrane	protein_coding
WBGene00022048	fln-1	IV:359238-376062	N2	rnp-6	OK	143.757	178.828	0.314939	1.56058	0.00665	0.0436819	yes	GO:0007015; GO:0071526; GO:0005884; GO:0005515; GO:0007411; GO:0007413; GO:0061038	actin filament; actin filament organization; protein binding; axon guidance; axonal fasciculation; uterus morphogenesis; semaphorin-plexin signaling pathway	protein_coding
WBGene00022047	Y66H1A.5	IV:428231-429084	N2	rnp-6	OK	20.1622	12.0828	-0.738693	-2.50876	5e-05	0.000725861	yes			protein_coding
WBGene00021011	W03G1.5	IV:504981-506600	N2	rnp-6	OK	0.921921	2.56076	1.47386	3.43984	5e-05	0.000725861	yes			protein_coding
WBGene00019660	K11H12.4	IV:674037-675883	N2	rnp-6	OK	1.20633	2.33868	0.955071	2.12968	0.00055	0.00597832	yes	GO:0045087; GO:0045121	innate immune response; membrane raft	protein_coding
WBGene00044459	Y55F3C.9	IV:719815-727481	N2	rnp-6	OK	2.04645	0.774329	-1.40211	-3.02593	5e-05	0.000725861	yes	GO:0016021; GO:0016020; GO:0005515	protein binding; integral component of membrane; membrane	protein_coding
WBGene00000677	col-103	IV:762411-763678	N2	rnp-6	OK	14.2501	19.6222	0.46152	1.79418	0.0016	0.014229	yes	GO:0005581; GO:0042302	structural constituent of cuticle; collagen trimer	protein_coding
WBGene00019068	faah-3	IV:940014-945651	N2	rnp-6	OK	30.4049	20.6017	-0.561542	-2.58096	5e-05	0.000725861	yes	GO:0016787; GO:0016884; GO:0004040	hydrolase activity; amidase activity; carbon-nitrogen ligase activity, with glutamine as amido-N-donor	protein_coding
WBGene00016638	perm-4	IV:1121456-1125107	N2	rnp-6	OK	315.372	388.649	0.301413	1.60271	0.0052	0.0361513	yes			protein_coding
WBGene00009522	F38A1.9	IV:1244246-1245344	N2	rnp-6	OK	0.274221	1.17535	2.09968	1.95569	0.00755	0.0480515	yes	GO:0045087	innate immune response	protein_coding
WBGene00009523	clec-165	IV:1245398-1246872	N2	rnp-6	OK	0.776866	2.04173	1.39406	2.30991	0.00065	0.0068644	yes	GO:0030246	carbohydrate binding	protein_coding
WBGene00009518	clec-166	IV:1247385-1251517	N2	rnp-6	OK	2.29666	4.53143	0.980432	2.93815	5e-05	0.000725861	yes	GO:0045087; GO:0030246	innate immune response; carbohydrate binding	protein_coding
WBGene00018776	F53H1.1	IV:1297223-1309644	N2	rnp-6	OK	39.3807	52.7674	0.422157	2.12447	0.0001	0.00135972	yes	GO:0005737; GO:0016787; ; GO:0005730; GO:0000398; GO:0000166; GO:0004004; GO:0003676; GO:0004386; GO:0010501; GO:0010468; GO:0005524	; nucleic acid binding; nucleolus; ATP-dependent RNA helicase activity; hydrolase activity; cytoplasm; RNA secondary structure unwinding; regulation of gene expression; ATP binding; helicase activity; nucleotide binding; mRNA splicing, via spliceosome	protein_coding
WBGene00235266	Y77E11A.23	IV:1427568-1430349	N2	rnp-6	OK	5.29485	3.51244	-0.592114	-1.59663	0.0061	0.040891	yes
WBGene00235267	Y77E11A.23	IV:1427568-1430349	N2	rnp-6	OK	5.29485	3.51244	-0.592114	-1.59663	0.0061	0.040891	yes			protein_coding
WBGene00000683	col-109	IV:1817044-1820253	N2	rnp-6	OK	0.358943	0.797635	1.15198	1.5619	0.0062	0.0413837	yes	GO:0016021; GO:0016020; GO:0005581; GO:0030968; GO:0042302	endoplasmic reticulum unfolded protein response; structural constituent of cuticle; collagen trimer; integral component of membrane; membrane	protein_coding
WBGene00016027	C23H5.8	IV:2111889-2113422	N2	rnp-6	OK	18.8741	26.7301	0.502057	1.849	0.00145	0.013173	yes			protein_coding
WBGene00022377	gpx-4	IV:2673097-2674734	N2	rnp-6	OK	2.03396	3.66244	0.848514	1.71481	0.00345	0.0262347	yes	GO:0005615; GO:0006979; GO:0098869; GO:0055114; GO:0004601; GO:0004602; GO:0016491	extracellular space; glutathione peroxidase activity; cellular oxidant detoxification; oxidoreductase activity; oxidation-reduction process; response to oxidative stress; peroxidase activity	protein_coding
WBGene00022382	Y94H6A.10	IV:2709899-2710670	N2	rnp-6	OK	134.064	77.3744	-0.792991	-3.81693	5e-05	0.000725861	yes			protein_coding
WBGene00021879	clec-83	IV:2838620-2841434	N2	rnp-6	OK	19.5699	26.8776	0.457765	1.84315	0.00145	0.013173	yes	GO:0045087; GO:0030246	innate immune response; carbohydrate binding	protein_coding
WBGene00021887	fbxc-45	IV:2919827-2922229	N2	rnp-6	OK	18.9358	25.5905	0.43449	1.77306	0.00215	0.018108	yes			protein_coding
WBGene00022069	eel-1	IV:3032765-3050102	N2	rnp-6	OK	74.8965	101.043	0.431996	2.26559	5e-05	0.000725861	yes	GO:0005737; GO:0045167; GO:0030178; GO:0061630; GO:0031581; GO:0005622; GO:0043065; GO:0016567; GO:0016740; GO:0042787; GO:0005488; GO:0005515; GO:0005634; GO:0004842; GO:0010468; GO:0042770	asymmetric protein localization involved in cell fate determination; ubiquitin protein ligase activity; transferase activity; positive regulation of apoptotic process; intracellular; binding; regulation of gene expression; hemidesmosome assembly; cytoplasm; ubiquitin-protein transferase activity; signal transduction in response to DNA damage; negative regulation of Wnt signaling pathway; protein …	protein_coding
WBGene00003153	mca-3	IV:3103166-3133143	N2	rnp-6	OK	64.2619	83.7803	0.382649	2.02201	0.00055	0.00597832	yes	GO:0009792; GO:0016021; GO:0016020; GO:0000166; GO:0046872; GO:0005524; GO:0016787; GO:0099132; GO:0006811; GO:0006810; GO:0006816; GO:0005887; GO:0005886; GO:0045807; GO:0040010; GO:0006897; GO:0043231; GO:0040017; GO:0051481; GO:0002119; GO:0070588; GO:0005388	negative regulation of cytosolic calcium ion concentration; positive regulation of growth rate; hydrolase activity; intracellular membrane-bounded organelle; ATP hydrolysis coupled cation transmembrane transport; nucleotide binding; plasma membrane; ion transport; metal ion binding; membrane; ATP binding; positive regulation of endocytosis; calcium-transporting ATPase activity; integral component…	protein_coding
WBGene00022060	dmd-9	IV:3253265-3254543	N2	rnp-6	OK	7.80369	10.6805	0.452749	1.55111	0.0067	0.0439419	yes	GO:0043565; GO:0003700; GO:0005634; GO:0006355; GO:0003677; GO:0046872	DNA binding transcription factor activity; regulation of transcription, DNA-templated; DNA binding; nucleus; sequence-specific DNA binding; metal ion binding	protein_coding
WBGene00044469	clec-173	IV:3266202-3267675	N2	rnp-6	OK	25.3217	17.2375	-0.554826	-2.04452	0.00055	0.00597832	yes	GO:0030246	carbohydrate binding	protein_coding
WBGene00015251	B0546.4	IV:3382949-3384147	N2	rnp-6	OK	42.067	32.3051	-0.380925	-1.56284	0.0057	0.0388114	yes	; GO:0046872	; metal ion binding	protein_coding
WBGene00001119	dyf-3	IV:3396580-3399123	N2	rnp-6	OK	15.9208	9.7355	-0.709591	-2.6503	5e-05	0.000725861	yes	; GO:0030992; GO:0006935; GO:0060271; GO:0030030; GO:0005813; GO:0030425; GO:0030424; GO:0003674; GO:0010446; GO:0005929; GO:0042995; GO:0043025; GO:0007635	; axon; cilium; response to alkaline pH; chemosensory behavior; molecular_function; intraciliary transport particle B; neuronal cell body; dendrite; chemotaxis; cell projection organization; cilium assembly; cell projection; centrosome	protein_coding
WBGene00022610	ZC416.6	IV:3606795-3613072	N2	rnp-6	OK	26.9699	36.2227	0.425543	1.97517	0.0007	0.00728567	yes	GO:0005737; GO:0090087; GO:0042277; GO:0043171; GO:0004301; GO:0010883; GO:0008270; GO:0070006; GO:2000192; GO:0006508; GO:0044255; GO:0008237; GO:0005488	peptide binding; metalloaminopeptidase activity; cytoplasm; regulation of lipid storage; binding; zinc ion binding; regulation of peptide transport; peptide catabolic process; negative regulation of fatty acid transport; metallopeptidase activity; proteolysis; cellular lipid metabolic process; epoxide hydrolase activity	protein_coding
WBGene00016987	CC8.2	IV:3645162-3648684	N2	rnp-6	OK	16.5398	22.9515	0.47265	1.99482	0.00065	0.0068644	yes	GO:0005975; GO:0005977; GO:0005515	protein binding; carbohydrate metabolic process; glycogen metabolic process	protein_coding
WBGene00003884	osm-3	IV:3794766-3800461	N2	rnp-6	OK	2.08999	1.25786	-0.732526	-1.94695	0.0013	0.0120757	yes	GO:0042073; GO:0097730; GO:0005929; GO:0005871; GO:0005874; GO:0061066; GO:0005856; GO:0036064; GO:0000166; GO:0043005; GO:0035720; GO:0048471; GO:0043025; GO:0003774; GO:0005524; GO:1902856; GO:0005737; GO:0060271; GO:0008017; GO:0046626; GO:1902857; GO:0022008; GO:0042995; GO:0008574; GO:0043053; GO:0007018; GO:0003777; GO:1905515	non-motile cilium; neuron projection; dauer entry; motor activity; cytoplasm; negative regulation of non-motile cilium assembly; cytoskeleton; nucleotide binding; cell projection; positive regulation of dauer larval development; ATP-dependent microtubule motor activity, plus-end-directed; neurogenesis; microtubule; intraciliary transport; ciliary basal body; ATP binding; intraciliary anterograde …	protein_coding
WBGene00018647	F49F1.7	IV:4123524-4125757	N2	rnp-6	OK	11.7505	3.58805	-1.71145	-4.46186	5e-05	0.000725861	yes			protein_coding
WBGene00044478	K06B9.6	IV:4196172-4196695	N2	rnp-6	OK	4.1628	1.46543	-1.50623	-2.31479	0.001	0.0097769	yes			protein_coding
WBGene00017489	F15E6.9	IV:4293619-4299083	N2	rnp-6	OK	1.12775	0.436905	-1.36805	-2.08574	0.00275	0.0219448	yes			protein_coding
WBGene00019956	fbxb-75	IV:4439819-4441163	N2	rnp-6	OK	10.6897	6.51421	-0.714565	-2.38664	5e-05	0.000725861	yes	GO:0005515	protein binding	protein_coding
WBGene00003694	nhr-104	IV:4784232-4788514	N2	rnp-6	OK	6.95544	4.92869	-0.496939	-1.55365	0.00605	0.0406593	yes	GO:0043565; GO:0003700; GO:0005634; GO:0006355; GO:0008270; GO:0043401; GO:0003677; GO:0046872; GO:0006351	steroid hormone mediated signaling pathway; regulation of transcription, DNA-templated; DNA binding; zinc ion binding; nucleus; metal ion binding; sequence-specific DNA binding; transcription, DNA-templated; DNA binding transcription factor activity	protein_coding
WBGene00021197	Y17G9A.4	IV:4860394-4861494	N2	rnp-6	OK	14.0246	8.21913	-0.770901	-2.4157	5e-05	0.000725861	yes	GO:0016021; GO:0016020	integral component of membrane; membrane	protein_coding
WBGene00020906	T28H11.8	IV:5017998-5020651	N2	rnp-6	OK	2.27294	1.43542	-0.663082	-1.59177	0.0076	0.0482968	yes	GO:0022857; GO:0016021; GO:0016020; GO:0006820; GO:0055085	anion transport; transmembrane transport; transmembrane transporter activity; integral component of membrane; membrane	protein_coding
WBGene00021996	Y59E9AL.6	IV:5224895-5225769	N2	rnp-6	OK	0.348137	1.08911	1.64543	1.82923	0.00515	0.0358984	yes			protein_coding
WBGene00021160	gba-4	IV:5344590-5350929	N2	rnp-6	OK	18.528	10.5483	-0.812695	-1.36705	0.0016	0.014229	yes	GO:0016787; GO:0004348; GO:0005764; GO:0006680; GO:0006665; GO:0006629	glucosylceramide catabolic process; lysosome; hydrolase activity; glucosylceramidase activity; lipid metabolic process; sphingolipid metabolic process	protein_coding
WBGene00047837	gba-4	IV:5344590-5350929	N2	rnp-6	OK	18.528	10.5483	-0.812695	-1.36705	0.0016	0.014229	yes
WBGene00047854	gba-4	IV:5344590-5350929	N2	rnp-6	OK	18.528	10.5483	-0.812695	-1.36705	0.0016	0.014229	yes
WBGene00166444	gba-4	IV:5344590-5350929	N2	rnp-6	OK	18.528	10.5483	-0.812695	-1.36705	0.0016	0.014229	yes
WBGene00021161	Y4C6B.7	IV:5351426-5353418	N2	rnp-6	OK	12.6309	6.89546	-0.873237	-2.08046	0.00105	0.0101691	yes			protein_coding
WBGene00001244	elo-6	IV:5386626-5388559	N2	rnp-6	OK	34.4927	53.1439	0.623613	2.76537	5e-05	0.000725861	yes	GO:0006633; GO:0030148; GO:0006631; GO:0006629; GO:0034625; GO:0042761; GO:0016021; GO:0016020; GO:0009922; GO:0016740; GO:0030176; GO:0102337; GO:0102336; GO:0102338; GO:0019367; GO:0034626	fatty acid elongase activity; fatty acid elongation, polyunsaturated fatty acid; 3-oxo-lignoceronyl-CoA synthase activity; sphingolipid biosynthetic process; 3-oxo-cerotoyl-CoA synthase activity; fatty acid elongation, monounsaturated fatty acid; integral component of endoplasmic reticulum membrane; 3-oxo-arachidoyl-CoA synthase activity; transferase activity; fatty acid metabolic process; fatty …	protein_coding
WBGene00016542	C39H7.4	IV:5611089-5614608	N2	rnp-6	OK	21.0782	15.9833	-0.399187	-1.62659	0.00435	0.0315234	yes	GO:0016021; GO:0016020; GO:0045087	innate immune response; integral component of membrane; membrane	protein_coding
WBGene00004112	pqn-22	IV:6015192-6033639	N2	rnp-6	OK	9.408	21.6322	1.20122	2.32397	5e-05	0.000725861	yes			protein_coding
WBGene00168969	pqn-22	IV:6015192-6033639	N2	rnp-6	OK	9.408	21.6322	1.20122	2.32397	5e-05	0.000725861	yes
WBGene00000535	cpi-1	IV:6092598-6093648	N2	rnp-6	OK	82.4502	54.223	-0.604619	-2.53365	5e-05	0.000725861	yes	GO:0005615; GO:2000117; GO:0010466; GO:0030414; GO:0002020; GO:0004869	peptidase inhibitor activity; extracellular space; cysteine-type endopeptidase inhibitor activity; protease binding; negative regulation of cysteine-type endopeptidase activity; negative regulation of peptidase activity	protein_coding
WBGene00019060	F58F9.7	IV:6245340-6248524	N2	rnp-6	OK	48.1647	16.2234	-1.56989	-7.31171	5e-05	0.000725861	yes	GO:0006631; GO:0050660; GO:0006635; GO:0033539; GO:0016627; GO:0005777; GO:0071949; GO:0008152; GO:0003995; GO:0003997; GO:0055114	oxidoreductase activity, acting on the CH-CH group of donors; fatty acid beta-oxidation using acyl-CoA dehydrogenase; fatty acid metabolic process; flavin adenine dinucleotide binding; FAD binding; metabolic process; oxidation-reduction process; peroxisome; fatty acid beta-oxidation; acyl-CoA oxidase activity; acyl-CoA dehydrogenase activity	protein_coding
WBGene00022236	Y73B6BL.12	IV:6317046-6317457	N2	rnp-6	OK	9.94717	4.26733	-1.22095	-2.45468	0.0002	0.00250605	yes	GO:0045454; GO:0006662; GO:0015035; GO:0005623; GO:0055114	cell; glycerol ether metabolic process; protein disulfide oxidoreductase activity; oxidation-reduction process; cell redox homeostasis	protein_coding
WBGene00004179	prg-2	IV:6526723-6529802	N2	rnp-6	OK	45.9219	31.6367	-0.537582	-2.6784	5e-05	0.000725861	yes	GO:0005515; GO:0003676	nucleic acid binding; protein binding	protein_coding
WBGene00001091	drh-2	IV:6613917-6618498	N2	rnp-6	OK	9.23492	6.8059	-0.440313	-1.84136	0.00195	0.0167396	yes
WBGene00044504	R13A1.10	IV:7225379-7227172	N2	rnp-6	OK	1.49906	0.629813	-1.25106	-2.02321	0.0019	0.0163938	yes	GO:0005515	protein binding	protein_coding
WBGene00015537	C06E4.8	IV:7284218-7285873	N2	rnp-6	OK	3.39544	5.30543	0.643873	1.64261	0.00465	0.03317	yes			protein_coding
WBGene00018345	F42C5.3	IV:7286181-7287569	N2	rnp-6	OK	0.346638	1.10015	1.6662	1.83438	0.0028	0.0222533	yes			protein_coding
WBGene00018350	ifo-1	IV:7320731-7326663	N2	rnp-6	OK	18.0654	22.9206	0.343414	1.70408	0.00305	0.0238181	yes			protein_coding
WBGene00021497	Y40C5A.4	IV:7349288-7365086	N2	rnp-6	OK	9.13271	5.0117	-0.865741	-1.22051	0.00605	0.0406593	yes	GO:0016021; GO:0016020; GO:0008889; GO:0006629; GO:0008081	phosphoric diester hydrolase activity; glycerophosphodiester phosphodiesterase activity; integral component of membrane; lipid metabolic process; membrane	protein_coding
WBGene00173345	Y40C5A.4	IV:7349288-7365086	N2	rnp-6	OK	9.13271	5.0117	-0.865741	-1.22051	0.00605	0.0406593	yes
WBGene00017418	F13B6.3	IV:7461963-7465957	N2	rnp-6	OK	2.43286	1.29527	-0.909397	-2.06847	0.0009	0.00897191	yes			protein_coding
WBGene00019902	R05G6.10	IV:7517445-7542535	N2	rnp-6	OK	11.0872	7.93193	-0.48315	-1.79237	0.0025	0.0203879	yes	GO:0007264; GO:0005085; GO:0043547; GO:0005622	small GTPase mediated signal transduction; intracellular; guanyl-nucleotide exchange factor activity; positive regulation of GTPase activity	protein_coding
WBGene00003758	nlp-20	IV:7642056-7643125	N2	rnp-6	OK	22.1532	15.354	-0.528898	-1.61964	0.0063	0.0419085	yes	GO:0007218	neuropeptide signaling pathway	protein_coding
WBGene00016378	imp-3	IV:7785973-7789508	N2	rnp-6	OK	43.9348	29.4203	-0.578551	-2.79198	5e-05	0.000725861	yes	GO:0030660; GO:0016021; GO:0016020; GO:0005765; GO:0071556; GO:0004190; GO:0071458; GO:0006508; GO:0008233	aspartic-type endopeptidase activity; peptidase activity; integral component of cytoplasmic side of endoplasmic reticulum membrane; lysosomal membrane; Golgi-associated vesicle membrane; integral component of lumenal side of endoplasmic reticulum membrane; membrane; proteolysis; integral component of membrane	protein_coding
WBGene00016795	C49H3.12	IV:7926600-7927291	N2	rnp-6	OK	5.67797	2.05351	-1.46728	-2.30101	0.0001	0.00135972	yes			protein_coding
WBGene00017644	exc-9	IV:7939811-7940850	N2	rnp-6	OK	15.5564	7.57774	-1.03767	-2.77763	5e-05	0.000725861	yes	GO:0005737; GO:0045138; GO:0035150; GO:0001738; GO:0008270; GO:0005515; GO:0010171; GO:0046872; GO:0002064	morphogenesis of a polarized epithelium; epithelial cell development; cytoplasm; body morphogenesis; regulation of tube size; metal ion binding; protein binding; zinc ion binding; nematode male tail tip morphogenesis	protein_coding
WBGene00001905	his-31	IV:8333671-8334005	N2	rnp-6	OK	416.752	298.631	-0.480824	-2.30197	5e-05	0.000725861	yes	GO:0042393; GO:0005634; GO:0003677; GO:0000786; GO:0000788; GO:0046982; GO:0005694; GO:0006334	nucleosome; histone binding; DNA binding; protein heterodimerization activity; nucleosome assembly; nuclear nucleosome; nucleus; chromosome	protein_coding
WBGene00020139	T01B11.2	IV:8449348-8451771	N2	rnp-6	OK	10.6288	4.34958	-1.28904	-4.33344	5e-05	0.000725861	yes	GO:0008453; GO:0008483; GO:0005739; GO:0003824; GO:0016740; GO:0030170; GO:0042802	pyridoxal phosphate binding; transferase activity; identical protein binding; transaminase activity; catalytic activity; mitochondrion; alanine-glyoxylate transaminase activity	protein_coding
WBGene00008971	F20C5.6	IV:8771710-8773195	N2	rnp-6	OK	13.5998	7.65903	-0.828354	-2.9866	5e-05	0.000725861	yes	GO:0005515	protein binding	protein_coding
WBGene00007902	C33D9.6	IV:8773951-8778145	N2	rnp-6	OK	10.3673	6.87934	-0.591704	-1.86995	0.0007	0.00728567	yes
WBGene00007900	C33D9.6	IV:8773951-8778145	N2	rnp-6	OK	10.3673	6.87934	-0.591704	-1.86995	0.0007	0.00728567	yes			protein_coding
WBGene00194651	C33D9.13	IV:8783321-8785239	N2	rnp-6	OK	6.69458	3.70557	-0.853297	-2.61547	5e-05	0.000725861	yes			protein_coding
WBGene00007496	npax-4	IV:8877528-8879893	N2	rnp-6	OK	3.5987	2.0375	-0.820674	-1.59132	0.00475	0.0337236	yes	; GO:0005634; GO:0006355; GO:0006351; GO:0003677; GO:0007275	; regulation of transcription, DNA-templated; DNA binding; nucleus; transcription, DNA-templated; multicellular organism development	protein_coding
WBGene00006852	unc-129	IV:9002836-9005410	N2	rnp-6	OK	4.97395	3.50189	-0.506259	-1.55084	0.00755	0.0480515	yes	GO:0040011; GO:0045138; GO:0005125; GO:0005615; GO:0033563; GO:0060395; GO:0005160; GO:0043408; GO:0043057; GO:0030509; GO:0040039; GO:0005576; GO:0008045; GO:0005102; GO:0010862; GO:0042981; GO:0008083	dorsal/ventral axon guidance; extracellular space; growth factor activity; SMAD protein signal transduction; motor neuron axon guidance; receptor binding; extracellular region; cytokine activity; inductive cell migration; regulation of MAPK cascade; regulation of apoptotic process; BMP signaling pathway; positive regulation of pathway-restricted SMAD protein phosphorylation; locomotion; transform…	protein_coding
WBGene00003958	pcp-3	IV:9155078-9159019	N2	rnp-6	OK	8.57165	13.5136	0.656766	2.92207	5e-05	0.000725861	yes	GO:0008239; GO:0006508; GO:0045121; GO:0008236	proteolysis; dipeptidyl-peptidase activity; membrane raft; serine-type peptidase activity	protein_coding
WBGene00003957	pcp-2	IV:9160639-9165127	N2	rnp-6	OK	0.739799	0.445484	-0.73176	-1.62629	0.0069	0.0450085	yes	GO:0008239; GO:0006508; GO:0045121; GO:0008236	proteolysis; dipeptidyl-peptidase activity; membrane raft; serine-type peptidase activity	protein_coding
WBGene00077756	Y11D7A.19	IV:9265809-9266561	N2	rnp-6	OK	1.42296	0.451993	-1.65453	-2.01387	0.003	0.0235082	yes			protein_coding
WBGene00009877	F49C12.7	IV:9309107-9312927	N2	rnp-6	OK	6.7362	3.96914	-0.763107	-2.42921	5e-05	0.000725861	yes			protein_coding
WBGene00007505	pezo-1	IV:9343357-9366506	N2	rnp-6	OK	26.3009	33.7957	0.36173	1.91386	0.0009	0.00897191	yes	GO:0042391; GO:0005261; GO:0050982; GO:0016021; GO:0016020; GO:0009612; GO:0034220; GO:0005886; GO:0098655; GO:0008381; GO:0071260	regulation of membrane potential; ion transmembrane transport; cation channel activity; cation transmembrane transport; mechanosensitive ion channel activity; membrane; response to mechanical stimulus; cellular response to mechanical stimulus; integral component of membrane; plasma membrane; detection of mechanical stimulus	protein_coding
WBGene00000695	col-121	IV:9394933-9396218	N2	rnp-6	OK	6.9417	1.87962	-1.88485	-4.77251	5e-05	0.000725861	yes	GO:0016021; GO:0016020; GO:0005581; GO:0042302	structural constituent of cuticle; collagen trimer; integral component of membrane; membrane	protein_coding
WBGene00003151	mca-1	IV:9625909-9634948	N2	rnp-6	OK	25.3921	32.3185	0.347979	1.79346	0.0026	0.0210083	yes	GO:0016787; GO:0006810; GO:0043231; GO:0099132; GO:0006874; GO:0016021; GO:0016020; GO:0070588; GO:0006816; GO:0005623; GO:0000166; GO:0005516; GO:0005887; GO:0005388; GO:0046872; GO:0006811; GO:0005524	cell; calcium-transporting ATPase activity; hydrolase activity; calcium ion transport; calmodulin binding; ion transport; calcium ion transmembrane transport; cellular calcium ion homeostasis; ATP binding; membrane; intracellular membrane-bounded organelle; ATP hydrolysis coupled cation transmembrane transport; nucleotide binding; integral component of plasma membrane; integral component of membr…	protein_coding
WBGene00010272	amph-1	IV:9643421-9647873	N2	rnp-6	OK	21.4197	16.6827	-0.360584	-1.60207	0.00435	0.0315234	yes	GO:0005737; GO:0006997; GO:0055037; GO:0005635; GO:0005515; GO:0051647; GO:0048471; GO:0060990	nuclear envelope; cytoplasm; nucleus localization; nucleus organization; perinuclear region of cytoplasm; protein binding; lipid tube assembly involved in organelle fission; recycling endosome	protein_coding
WBGene00006056	sss-1	IV:9892738-9893749	N2	rnp-6	OK	1.4367	2.74325	0.933134	1.86559	0.0022	0.0184426	yes			protein_coding
WBGene00001650	gon-1	IV:9935066-9953429	N2	rnp-6	OK	2.14993	3.52447	0.713114	2.86801	5e-05	0.000725861	yes	GO:1905607; GO:0005783; GO:0005794; GO:0031012; GO:0046872; GO:0008270; GO:0008233; GO:0007275; GO:0008237; GO:0005737; GO:0006888; GO:0008406; GO:0006508; GO:0016477; GO:0048644; GO:0016787; GO:0004222; GO:0006810; GO:0005604; GO:0016192; GO:0005576; GO:0015031; GO:0005578	Golgi apparatus; hydrolase activity; cytoplasm; vesicle-mediated transport; zinc ion binding; basement membrane; proteolysis; transport; cell migration; extracellular matrix; peptidase activity; metalloendopeptidase activity; endoplasmic reticulum; metal ion binding; multicellular organism development; negative regulation of presynapse assembly; gonad development; ER to Golgi vesicle-mediated tra…	protein_coding
WBGene00009681	gipc-2	IV:10026410-10027665	N2	rnp-6	OK	1.68947	2.76998	0.713307	1.62303	0.00595	0.0401087	yes	GO:0031982; GO:0005515	protein binding; vesicle	protein_coding
WBGene00011423	ipla-7	IV:10056602-10062849	N2	rnp-6	OK	26.6592	12.7343	-1.06592	-4.68316	5e-05	0.000725861	yes	GO:0016787; GO:0006629; GO:0008152; GO:0016042	metabolic process; hydrolase activity; lipid catabolic process; lipid metabolic process	protein_coding
WBGene00011175	R09E10.5	IV:10296086-10302310	N2	rnp-6	OK	4.15568	1.36462	-1.60658	-5.38732	5e-05	0.000725861	yes	GO:0007160; GO:0016021; GO:0016020	cell-matrix adhesion; integral component of membrane; membrane	protein_coding
WBGene00219215	F13B12.15	IV:10420862-10421187	N2	rnp-6	OK	0	1.13189	inf		0.0066	0.0434415	yes
WBGene00008488	F01D4.5	IV:10482624-10483648	N2	rnp-6	OK	42.9139	30.8706	-0.475215	-1.96576	0.00065	0.0068644	yes	GO:0003700; GO:0044212; GO:0005634; GO:0045944;	; transcription regulatory region DNA binding; nucleus; DNA binding transcription factor activity; positive regulation of transcription from RNA polymerase II promoter	protein_coding
WBGene00011596	T07G12.5	IV:10541429-10545091	N2	rnp-6	OK	15.7019	8.292	-0.921146	-3.14931	5e-05	0.000725861	yes	GO:0005215; GO:0016021; GO:0016020; GO:0055085; GO:0006810	transporter activity; transmembrane transport; integral component of membrane; transport; membrane	protein_coding
WBGene00010146	glb-19	IV:10642718-10654147	N2	rnp-6	OK	0.884488	1.82713	1.04666	1.55274	0.0046	0.032894	yes	GO:0005344; GO:0006810; GO:0019825; GO:0015671; GO:0020037	heme binding; oxygen carrier activity; oxygen binding; transport; oxygen transport	protein_coding
WBGene00010647	K08C7.4	IV:10679588-10680475	N2	rnp-6	OK	4.70361	11.1004	1.23877	3.4448	5e-05	0.000725861	yes			protein_coding
WBGene00011258	best-15	IV:10829550-10832248	N2	rnp-6	OK	1.32391	0.482398	-1.45651	-2.7835	5e-05	0.000725861	yes	GO:0006810; GO:1902476; GO:0016021; GO:0016020; GO:0034707; GO:0006821; GO:0005886; GO:0005254; GO:0006811	chloride channel complex; chloride transmembrane transport; chloride transport; chloride channel activity; ion transport; plasma membrane; membrane; integral component of membrane; transport	protein_coding
WBGene00012382	ttr-16	IV:11054309-11064141	N2	rnp-6	OK	322.786	419.193	0.377036	1.6518	0.00455	0.0326223	yes	GO:0005576; GO:0005615	extracellular region; extracellular space	protein_coding
WBGene00012383	ttr-17	IV:11066005-11067072	N2	rnp-6	OK	111.189	81.438	-0.449241	-1.97683	0.0006	0.00643061	yes	GO:0005615	extracellular space	protein_coding
WBGene00007808	best-7	IV:11226588-11230249	N2	rnp-6	OK	4.09193	2.4133	-0.761776	-2.27298	0.0002	0.00250605	yes	GO:0006810; GO:1902476; GO:0016021; GO:0016020; GO:0034707; GO:0006821; GO:0005886; GO:0005254; GO:0006811	chloride channel complex; chloride transmembrane transport; chloride transport; chloride channel activity; ion transport; plasma membrane; membrane; integral component of membrane; transport	protein_coding
WBGene00003606	nhr-7	IV:11266291-11268855	N2	rnp-6	OK	1.16119	1.93655	0.737878	1.77075	0.00275	0.0219448	yes	GO:0043565; GO:0003700; GO:0005634; GO:0006355; GO:0008270; GO:0043401; GO:0003677; GO:0046872; GO:0006351	steroid hormone mediated signaling pathway; regulation of transcription, DNA-templated; DNA binding; zinc ion binding; nucleus; metal ion binding; sequence-specific DNA binding; transcription, DNA-templated; DNA binding transcription factor activity	protein_coding
WBGene00007112	B0035.13	IV:11299007-11306720	N2	rnp-6	OK	47.5523	23.0038	-1.04764	-2.77143	5e-05	0.000725861	yes	GO:0016787; GO:0006629	hydrolase activity; lipid metabolic process	protein_coding
WBGene00001108	dsl-6	IV:11396787-11398317	N2	rnp-6	OK	4.92061	1.03461	-2.24975	-4.55076	5e-05	0.000725861	yes	GO:0005515; GO:0016021; GO:0016020; GO:0005887; GO:0007154; GO:0001708; GO:0007275; GO:0000003	integral component of plasma membrane; protein binding; cell communication; cell fate specification; reproduction; membrane; multicellular organism development; integral component of membrane	protein_coding
WBGene00010234	ttr-50	IV:11640144-11641015	N2	rnp-6	OK	155.219	110.579	-0.48923	-2.44585	5e-05	0.000725861	yes	GO:0005615	extracellular space	protein_coding
WBGene00001398	fat-6	IV:11913689-11915796	N2	rnp-6	OK	192.258	307.701	0.678483	3.50103	5e-05	0.000725861	yes	GO:0006633; ; GO:0006631; GO:0006629; GO:0016021; GO:0016020; GO:0016717; GO:0007275; GO:0030176; GO:0042759; GO:0004768; GO:0045087; GO:0055114; GO:0016491	; innate immune response; integral component of endoplasmic reticulum membrane; fatty acid metabolic process; oxidoreductase activity, acting on paired donors, with oxidation of a pair of donors resulting in the reduction of molecular oxygen to two molecules of water; oxidoreductase activity; fatty acid biosynthetic process; long-chain fatty acid biosynthetic process; oxidation-reduction process;…	protein_coding
WBGene00014089	ZK822.1	IV:11918109-11922128	N2	rnp-6	OK	0.993178	0.241865	-2.03785	-3.60103	5e-05	0.000725861	yes			protein_coding
WBGene00006759	unc-22	IV:11970533-12011007	N2	rnp-6	OK	19.4928	35.2664	0.855352	2.15022	5e-05	0.000725861	yes	; GO:0018107; GO:0018105; GO:0016310; GO:0030017; GO:0045989; GO:0005737; GO:0031672; GO:0000166; GO:0004674; GO:0016740; GO:0004672; GO:0046872; GO:0005524; GO:0006468; GO:0016301; GO:0019901; GO:0008344; GO:0060298; GO:0040017; GO:0035095; GO:0051782; GO:0005516; GO:0005515	; cytoplasm; adult locomotory behavior; nucleotide binding; positive regulation of sarcomere organization; protein binding; protein kinase activity; kinase activity; calmodulin binding; ATP binding; metal ion binding; negative regulation of cell division; positive regulation of striated muscle contraction; sarcomere; protein kinase binding; protein phosphorylation; A band; transferase activity; b…	protein_coding
WBGene00195274	unc-22	IV:11970533-12011007	N2	rnp-6	OK	19.4928	35.2664	0.855352	2.15022	5e-05	0.000725861	yes
WBGene00000703	col-129	IV:12108670-12110258	N2	rnp-6	OK	30.1301	50.9219	0.757082	3.3324	5e-05	0.000725861	yes	GO:0005581; GO:0005515; GO:0042302	protein binding; structural constituent of cuticle; collagen trimer	protein_coding
WBGene00003772	nlr-1	IV:12170833-12178335	N2	rnp-6	OK	4.14924	2.14957	-0.948797	-3.33503	5e-05	0.000725861	yes	GO:0016021; GO:0016020; GO:0005509; GO:0005515	calcium ion binding; protein binding; integral component of membrane; membrane	protein_coding
WBGene00004025	phy-2	IV:12211094-12215987	N2	rnp-6	OK	6.86542	4.30942	-0.671856	-2.26135	5e-05	0.000725861	yes	GO:0031418; GO:0005783; GO:0051213; GO:0004656; GO:0016705; GO:0016702; GO:0005788; GO:0019511; GO:0043412; GO:0005515; GO:0005506; GO:0046872; GO:0031545; GO:0055114; GO:0016491	oxidoreductase activity, acting on single donors with incorporation of molecular oxygen, incorporation of two atoms of oxygen; macromolecule modification; protein binding; procollagen-proline 4-dioxygenase activity; oxidoreductase activity; endoplasmic reticulum; iron ion binding; oxidoreductase activity, acting on paired donors, with incorporation or reduction of molecular oxygen; peptidyl-proli…	protein_coding
WBGene00011416	T04A11.1	IV:12475309-12477042	N2	rnp-6	OK	1.619	0.729806	-1.14951	-1.88631	0.00265	0.0213265	yes	GO:0003824; GO:0009058	catalytic activity; biosynthetic process	protein_coding
WBGene00009957	F53B2.8	IV:12526246-12527339	N2	rnp-6	OK	93.6969	49.4734	-0.921348	-4.25324	5e-05	0.000725861	yes			protein_coding
WBGene00007779	C27D8.3	IV:12704108-12711744	N2	rnp-6	OK	20.435	7.73889	-1.40084	-4.23988	5e-05	0.000725861	yes			protein_coding
WBGene00011951	T23F6.3	IV:12723102-12724602	N2	rnp-6	OK	36.437	1.53409	-4.56995	-7.58315	5e-05	0.000725861	yes	; GO:0008270; GO:0005515	; protein binding; zinc ion binding	protein_coding
WBGene00014135	ZK896.4	IV:12880666-12883146	N2	rnp-6	OK	2.64792	1.33598	-0.986964	-2.33176	0.00025	0.00303907	yes			protein_coding
WBGene00008177	C48D1.1	IV:13193666-13197382	N2	rnp-6	OK	4.66463	2.75473	-0.759849	-2.40412	5e-05	0.000725861	yes	; GO:0016567; GO:0051438; GO:0005515; GO:0031462; GO:0004842; GO:0005488	; protein binding; binding; regulation of ubiquitin-protein transferase activity; ubiquitin-protein transferase activity; protein ubiquitination; Cul2-RING ubiquitin ligase complex	protein_coding
WBGene00194643	C48D1.9	IV:13207389-13209688	N2	rnp-6	OK	2.24861	1.0539	-1.0933	-1.63675	0.00525	0.0364418	yes	; GO:0016021; GO:0016020	; integral component of membrane; membrane	protein_coding
WBGene00009943	F52G2.3	IV:13543398-13548230	N2	rnp-6	OK	3.25161	4.6799	0.525323	1.73055	0.0029	0.0228734	yes			protein_coding
WBGene00007460	C08F11.13	IV:13607439-13609884	N2	rnp-6	OK	31.9574	22.6201	-0.498545	-1.72703	0.00105	0.0101691	yes	GO:0016021; GO:0016020; GO:0033692	cellular polysaccharide biosynthetic process; integral component of membrane; membrane	protein_coding
WBGene00046275	C08F11.13	IV:13607439-13609884	N2	rnp-6	OK	31.9574	22.6201	-0.498545	-1.72703	0.00105	0.0101691	yes
WBGene00007458	C08F11.11	IV:13646734-13647658	N2	rnp-6	OK	697.348	557.555	-0.322766	-1.6937	0.0034	0.0259387	yes	GO:0005576	extracellular region	protein_coding
WBGene00007459	C08F11.12	IV:13650659-13651511	N2	rnp-6	OK	100.364	58.5056	-0.778598	-3.07643	5e-05	0.000725861	yes	GO:0005576	extracellular region	protein_coding
WBGene00000707	col-133	IV:14098334-14099352	N2	rnp-6	OK	1.34371	3.22016	1.26091	2.53435	0.00015	0.00195025	yes	GO:0016021; GO:0016020; GO:0005581; GO:0042302	structural constituent of cuticle; collagen trimer; integral component of membrane; membrane	protein_coding
WBGene00013293	Y57G11A.5	IV:14511883-14512505	N2	rnp-6	OK	0	0.507553	inf		0.0018	0.0156835	yes	GO:0003723; GO:0003676	RNA binding; nucleic acid binding	protein_coding
WBGene00013334	Y57G11C.45	IV:14783416-14784231	N2	rnp-6	OK	8.20853	2.89253	-1.50479	-2.68601	5e-05	0.000725861	yes	GO:0007218	neuropeptide signaling pathway	protein_coding
WBGene00000708	col-135	IV:15129661-15131786	N2	rnp-6	OK	3.70625	5.38958	0.540213	1.8093	0.0016	0.014229	yes	GO:0005581	collagen trimer	protein_coding
WBGene00001604	gln-3	IV:16167782-16170826	N2	rnp-6	OK	17.5273	24.7094	0.495454	1.93435	0.001	0.0097769	yes	GO:0004356; GO:0000166; GO:0003824; GO:0006807; GO:0006542; GO:0016874; GO:0005524	catalytic activity; nitrogen compound metabolic process; glutamate-ammonia ligase activity; glutamine biosynthetic process; ligase activity; ATP binding; nucleotide binding	protein_coding
WBGene00012420	Y7A9D.1	IV:16381375-16382211	N2	rnp-6	OK	23.9828	14.5742	-0.718581	-2.30075	5e-05	0.000725861	yes			protein_coding
WBGene00013794	dct-13	IV:17024317-17025129	N2	rnp-6	OK	5.08066	3.24599	-0.64636	-1.58746	0.0072	0.0464409	yes	GO:0061158; GO:0005829; GO:0046872; GO:0003730	mRNA 3'-UTR binding; cytosol; 3'-UTR-mediated mRNA destabilization; metal ion binding	protein_coding
WBGene00013808	sfa-1	IV:17104215-17110982	N2	rnp-6	OK	66.6825	82.0733	0.299604	1.57585	0.0068	0.044487	yes	GO:0000380; GO:0045131; GO:0000398; GO:0003723; GO:0003676; GO:0008270	nucleic acid binding; RNA binding; zinc ion binding; pre-mRNA branch point binding; mRNA splicing, via spliceosome; alternative mRNA splicing, via spliceosome	protein_coding
WBGene00006698	uaf-2	IV:17116762-17118760	N2	rnp-6	OK	59.1061	76.0708	0.364036	1.75072	0.0025	0.0203879	yes	; GO:0030628; GO:0089701; GO:0000398; GO:0003723; GO:0003676; GO:0046872; GO:0005681	; nucleic acid binding; RNA binding; spliceosomal complex; U2AF; pre-mRNA 3'-splice site binding; metal ion binding; mRNA splicing, via spliceosome	protein_coding
WBGene00014000	ZK550.6	IV:17260303-17262485	N2	rnp-6	OK	108.15	68.1074	-0.667145	-3.25654	5e-05	0.000725861	yes	GO:0031418; GO:0006631; GO:0001561; GO:0051213; GO:0048244; GO:0046872; GO:0055114; GO:0016491	fatty acid metabolic process; oxidoreductase activity; fatty acid alpha-oxidation; metal ion binding; L-ascorbic acid binding; dioxygenase activity; phytanoyl-CoA dioxygenase activity; oxidation-reduction process	protein_coding
WBGene00012130	slc-17.4	IV:17288170-17291733	N2	rnp-6	OK	4.96704	6.81211	0.455714	1.64054	0.00385	0.0286865	yes	GO:0022857; GO:0016021; GO:0016020; GO:0006820; GO:0055085	anion transport; transmembrane transport; transmembrane transporter activity; integral component of membrane; membrane	protein_coding
WBGene00008199	C49C3.9	IV:17339655-17342314	N2	rnp-6	OK	14.8908	10.8383	-0.458291	-1.80052	0.00165	0.0145952	yes	GO:0050829; GO:0045087	innate immune response; defense response to Gram-negative bacterium	protein_coding
WBGene00011374	T02D1.8	IV:17386791-17387499	N2	rnp-6	OK	22.3539	13.6819	-0.708258	-2.18352	0.00045	0.00504819	yes			protein_coding
WBGene00001240	elo-2	IV:17466059-17467408	N2	rnp-6	OK	21.8262	30.4876	0.482163	2.00599	0.0008	0.00816818	yes	GO:0006633; GO:0030148; GO:0006631; GO:0006629; GO:0034625; GO:0102338; GO:0042761; GO:0016021; GO:0016020; GO:0102337; GO:0009922; GO:0016740; GO:0030176; GO:0035264; GO:0102336; GO:0008340; GO:0019367; GO:0034626; GO:0010468; GO:0000003	fatty acid elongase activity; multicellular organism growth; 3-oxo-lignoceronyl-CoA synthase activity; sphingolipid biosynthetic process; 3-oxo-cerotoyl-CoA synthase activity; reproduction; integral component of endoplasmic reticulum membrane; fatty acid elongation, polyunsaturated fatty acid; 3-oxo-arachidoyl-CoA synthase activity; transferase activity; fatty acid metabolic process; regulation o…	protein_coding
WBGene00010959	atp-6,nduo-1	MtDNA:1762-3235	N2	rnp-6	OK	1467.62	1839.61	0.325923	1.6808	0.00365	0.0274633	yes	GO:0008137; GO:0016021; GO:0016020; GO:0005739; GO:0006120; GO:0005743; GO:0045333; GO:0005747; GO:0070469; GO:0055114; GO:0016491	mitochondrial electron transport, NADH to ubiquinone; mitochondrial respiratory chain complex I; mitochondrial inner membrane; NADH dehydrogenase (ubiquinone) activity; oxidoreductase activity; oxidation-reduction process; membrane; mitochondrion; cellular respiration; integral component of membrane; respiratory chain	protein_coding
WBGene00010960	atp-6,nduo-1	MtDNA:1762-3235	N2	rnp-6	OK	1467.62	1839.61	0.325923	1.6808	0.00365	0.0274633	yes	GO:0045263; GO:0006810; GO:0015992; GO:0016021; GO:0016020; GO:0005739; GO:0015078; GO:0005743; GO:0015986; GO:0006754; GO:0006811	ATP biosynthetic process; mitochondrial inner membrane; ATP synthesis coupled proton transport; proton transport; ion transport; proton-transporting ATP synthase complex, coupling factor F(o); membrane; mitochondrion; integral component of membrane; transport; hydrogen ion transmembrane transporter activity	protein_coding
WBGene00014460	nduo-2	MtDNA:3361-4328	N2	rnp-6	OK	3.43039	6.03907	0.815955	1.32353	0.0042	0.0306843	yes
WBGene00010961	nduo-2	MtDNA:3361-4328	N2	rnp-6	OK	3.43039	6.03907	0.815955	1.32353	0.0042	0.0306843	yes	GO:0008137; GO:0016021; GO:0016020; GO:0005739; GO:0006120; GO:0005743; GO:0005747; GO:0070469; GO:0055114; GO:0016491	mitochondrial electron transport, NADH to ubiquinone; mitochondrial respiratory chain complex I; mitochondrial inner membrane; NADH dehydrogenase (ubiquinone) activity; oxidoreductase activity; oxidation-reduction process; membrane; mitochondrion; integral component of membrane; respiratory chain	protein_coding
WBGene00014461	nduo-2	MtDNA:3361-4328	N2	rnp-6	OK	3.43039	6.03907	0.815955	1.32353	0.0042	0.0306843	yes
WBGene00044689	arid-1	V:186304-200686	N2	rnp-6	OK	36.9927	47.4542	0.359293	1.90929	0.001	0.0097769	yes	; GO:0044212; GO:0017053; GO:0005634; GO:0006355; GO:0006357; GO:0003677	; transcription regulatory region DNA binding; regulation of transcription, DNA-templated; DNA binding; transcriptional repressor complex; nucleus; regulation of transcription from RNA polymerase II promoter	protein_coding
WBGene00022643	ZK6.8	V:381900-384688	N2	rnp-6	OK	15.5708	21.1299	0.440446	1.90058	0.001	0.0097769	yes	GO:0016021; GO:0016020	integral component of membrane; membrane	protein_coding
WBGene00021448	Y39D8A.1	V:419686-421841	N2	rnp-6	OK	0.604321	1.19985	0.989468	1.70716	0.00215	0.018108	yes	GO:0016021; GO:0016020	integral component of membrane; membrane	protein_coding
WBGene00019743	nhr-203	V:459768-462075	N2	rnp-6	OK	2.43282	4.18741	0.783427	2.2827	0.00035	0.00407043	yes	GO:0043565; GO:0003700; GO:0005634; GO:0006355; GO:0008270; GO:0043401; GO:0003677; GO:0046872; GO:0006351	steroid hormone mediated signaling pathway; regulation of transcription, DNA-templated; DNA binding; zinc ion binding; nucleus; metal ion binding; sequence-specific DNA binding; transcription, DNA-templated; DNA binding transcription factor activity	protein_coding
WBGene00019742	nhr-202	V:462599-464892	N2	rnp-6	OK	3.41588	2.00739	-0.766934	-1.74084	0.00435	0.0315234	yes	GO:0043565; GO:0003700; GO:0005634; GO:0006355; GO:0008270; GO:0043401; GO:0003677; GO:0046872; GO:0006351	steroid hormone mediated signaling pathway; regulation of transcription, DNA-templated; DNA binding; zinc ion binding; nucleus; metal ion binding; sequence-specific DNA binding; transcription, DNA-templated; DNA binding transcription factor activity	protein_coding
WBGene00004144	pqn-60	V:504038-504616	N2	rnp-6	OK	11.1153	18.9604	0.770445	2.26146	0.0002	0.00250605	yes	GO:0005515	protein binding	protein_coding
WBGene00017957	F31F4.1	V:684088-686134	N2	rnp-6	OK	3.45129	2.15198	-0.68147	-1.63288	0.0066	0.0434415	yes	GO:0016021; GO:0016020	integral component of membrane; membrane	protein_coding
WBGene00219801	srh-2	V:728230-734279	N2	rnp-6	OK	23.7362	0.47059	-5.65647	-3.38718	5e-05	0.000725861	yes
WBGene00005228	srh-2	V:728230-734279	N2	rnp-6	OK	23.7362	0.47059	-5.65647	-3.38718	5e-05	0.000725861	yes	GO:0016021; GO:0016020; GO:0050907	detection of chemical stimulus involved in sensory perception; integral component of membrane; membrane	protein_coding
WBGene00044514	R09E12.9	V:777570-778235	N2	rnp-6	OK	6.79787	3.49806	-0.958527	-1.92997	0.00285	0.0225677	yes			protein_coding
WBGene00019971	ergo-1	V:1008802-1023094	N2	rnp-6	OK	73.0738	93.2243	0.351351	1.8135	0.0018	0.0156835	yes	GO:0005737; GO:0003676; GO:0030422; GO:0031047; GO:0005515; GO:0017151; GO:0006417; GO:0016246	nucleic acid binding; RNA interference; production of siRNA involved in RNA interference; cytoplasm; DEAD/H-box RNA helicase binding; regulation of translation; gene silencing by RNA; protein binding	protein_coding
WBGene00019624	K10C9.3	V:1061594-1067908	N2	rnp-6	OK	38.4525	26.597	-0.531811	-2.21201	0.0001	0.00135972	yes	GO:0090502; GO:0033897; GO:0003723	RNA binding; RNA phosphodiester bond hydrolysis, endonucleolytic; ribonuclease T2 activity	protein_coding
WBGene00021743	Y50D4B.4	V:1092678-1098951	N2	rnp-6	OK	6.92003	4.46116	-0.633361	-2.32147	0.0001	0.00135972	yes	GO:0005737; GO:0016021; GO:0016020; GO:0006516	glycoprotein catabolic process; cytoplasm; integral component of membrane; membrane	protein_coding
WBGene00016540	C39F7.5	V:1264772-1270104	N2	rnp-6	OK	7.77605	4.3339	-0.843371	-3.03245	5e-05	0.000725861	yes			protein_coding
WBGene00000558	cnc-4	V:1447221-1447707	N2	rnp-6	OK	68.5067	46.2845	-0.565715	-2.10553	0.00025	0.00303907	yes	GO:0050832; GO:0016021; GO:0016020; GO:0045087	innate immune response; defense response to fungus; integral component of membrane; membrane	protein_coding
WBGene00019978	hacd-1	V:1460368-1461614	N2	rnp-6	OK	12.8522	52.6074	2.03325	8.31606	5e-05	0.000725861	yes	GO:0006631; GO:0016021; GO:0016020; GO:0070403; GO:0003857; GO:0055114; GO:0016491	3-hydroxyacyl-CoA dehydrogenase activity; fatty acid metabolic process; oxidoreductase activity; NAD+ binding; oxidation-reduction process; membrane; integral component of membrane	protein_coding
WBGene00017507	F16B4.5	V:1589080-1591727	N2	rnp-6	OK	1.06252	4.91258	2.20899	2.28808	0.0023	0.0191136	yes			protein_coding
WBGene00002018	hsp-16.41	V:1805232-1805875	N2	rnp-6	OK	14.3367	3.05178	-2.23199	-5.13715	5e-05	0.000725861	yes	GO:0050829; GO:0009408; GO:0051082; GO:0030968	response to heat; endoplasmic reticulum unfolded protein response; unfolded protein binding; defense response to Gram-negative bacterium	protein_coding
WBGene00020393	T10B5.7	V:1846200-1848015	N2	rnp-6	OK	44.3254	22.844	-0.956319	-4.07187	5e-05	0.000725861	yes	GO:0016787; GO:0006629	hydrolase activity; lipid metabolic process	protein_coding
WBGene00005644	srp-3	V:1908895-1910692	N2	rnp-6	OK	0.368627	1.08386	1.55595	2.2693	0.00045	0.00504819	yes	GO:0010951; GO:0006508; GO:0008233; GO:0005615; GO:0004867	peptidase activity; extracellular space; proteolysis; serine-type endopeptidase inhibitor activity; negative regulation of endopeptidase activity	protein_coding
WBGene00020343	acs-3	V:1969540-1974515	N2	rnp-6	OK	6.47507	9.7294	0.587454	2.2871	0.00015	0.00195025	yes	GO:0003824; GO:0008152	metabolic process; catalytic activity	protein_coding
WBGene00018099	ztf-28	V:2090139-2095282	N2	rnp-6	OK	13.6997	18.2814	0.416238	1.59519	0.0066	0.0434415	yes	GO:0003676	nucleic acid binding	protein_coding
WBGene00017720	F22F7.2	V:2122826-2127360	N2	rnp-6	OK	1.24253	0.601836	-1.04583	-1.95301	0.0016	0.014229	yes	GO:0055114; GO:0016491	oxidation-reduction process; oxidoreductase activity	protein_coding
WBGene00018262	cyp-33C3	V:2242777-2244873	N2	rnp-6	OK	0.977194	1.68163	0.783142	1.82282	0.00175	0.015327	yes	GO:0004497; GO:0008395; GO:0020037; GO:0016705; GO:0005506; GO:0046872; GO:0055114; GO:0016491	oxidoreductase activity; iron ion binding; oxidoreductase activity, acting on paired donors, with incorporation or reduction of molecular oxygen; steroid hydroxylase activity; metal ion binding; heme binding; monooxygenase activity; oxidation-reduction process	protein_coding
WBGene00018910	F56A4.2	V:2459636-2460893	N2	rnp-6	OK	0.803941	6.53384	3.02277	5.3578	5e-05	0.000725861	yes	GO:0045087; GO:0030246	innate immune response; carbohydrate binding	protein_coding
WBGene00020182	ugt-53	V:2849351-2852031	N2	rnp-6	OK	2.99981	1.59314	-0.912992	-2.33084	0.0002	0.00250605	yes	GO:0043231; GO:0016021; GO:0016020; GO:0016740; GO:0008152; GO:0016758; GO:0015020	transferase activity; membrane; integral component of membrane; metabolic process; glucuronosyltransferase activity; intracellular membrane-bounded organelle; transferase activity, transferring hexosyl groups	protein_coding
WBGene00019105	asp-8	V:3024218-3027933	N2	rnp-6	OK	0.832825	2.50628	1.58946	3.44833	5e-05	0.000725861	yes	GO:0016787; GO:0008233; GO:0004190; GO:0030163; GO:0006508	hydrolase activity; peptidase activity; proteolysis; aspartic-type endopeptidase activity; protein catabolic process	protein_coding
WBGene00044526	T28A11.22	V:3257584-3258240	N2	rnp-6	OK	5.86392	3.02451	-0.955162	-1.92652	0.00235	0.0194563	yes	GO:0005515	protein binding	protein_coding
WBGene00015434	C04E12.4	V:3362783-3368321	N2	rnp-6	OK	1.61895	0.218097	-2.89202	-4.5838	5e-05	0.000725861	yes	GO:0005737; GO:0005829; GO:0005634; GO:0016020; GO:0006516; GO:0006517; GO:0000224; GO:0006515; GO:0016021	glycoprotein catabolic process; cytosol; cytoplasm; protein deglycosylation; protein quality control for misfolded or incompletely synthesized proteins; peptide-N4-(N-acetyl-beta-glucosaminyl)asparagine amidase activity; nucleus; membrane; integral component of membrane	protein_coding
WBGene00017867	slc-28.1	V:3463813-3466150	N2	rnp-6	OK	1.35599	0.716737	-0.919827	-1.90932	0.0023	0.0191136	yes	GO:0006810; GO:0005337; GO:0016021; GO:0016020; GO:0005415; GO:0005887; GO:1901642	nucleoside transmembrane transport; nucleoside:sodium symporter activity; integral component of plasma membrane; nucleoside transmembrane transporter activity; membrane; integral component of membrane; transport	protein_coding
WBGene00015574	irg-1	V:3523586-3524575	N2	rnp-6	OK	2.15979	0.719266	-1.5863	-2.23415	0.00105	0.0101691	yes	GO:0005575; GO:0045087; GO:0003674; GO:0019239; GO:0009451	innate immune response; RNA modification; cellular_component; deaminase activity; molecular_function	protein_coding
WBGene00021081	W08A12.4	V:3673379-3676632	N2	rnp-6	OK	0.303069	0.909143	1.58486	2.25422	0.0011	0.0105816	yes			protein_coding
WBGene00003025	lin-40	V:3704994-3715969	N2	rnp-6	OK	48.1547	60.235	0.322925	1.58603	0.00605	0.0406593	yes	GO:0043565; GO:0003700; GO:0005634; GO:0006355; GO:0008270; GO:0003677; GO:0003682	chromatin binding; regulation of transcription, DNA-templated; DNA binding; zinc ion binding; nucleus; sequence-specific DNA binding; DNA binding transcription factor activity	protein_coding
WBGene00019970	R08F11.7	V:3790132-3793766	N2	rnp-6	OK	0.228544	1.11435	2.28566	3.99515	5e-05	0.000725861	yes	GO:0005615; GO:0020037; GO:0006979; GO:0098869; GO:0050830; GO:0004601; GO:0055114	extracellular space; cellular oxidant detoxification; oxidation-reduction process; heme binding; defense response to Gram-positive bacterium; response to oxidative stress; peroxidase activity	protein_coding
WBGene00015897	nhr-156	V:3906140-3906947	N2	rnp-6	OK	0.476718	1.30251	1.45009	1.71621	0.0072	0.0464409	yes	GO:0043565; GO:0003700; GO:0005634; GO:0006355; GO:0008270; GO:0043401; GO:0003677; GO:0046872; GO:0006351	steroid hormone mediated signaling pathway; regulation of transcription, DNA-templated; DNA binding; zinc ion binding; nucleus; metal ion binding; sequence-specific DNA binding; transcription, DNA-templated; DNA binding transcription factor activity	protein_coding
WBGene00020606	nhr-284	V:3907792-3908381	N2	rnp-6	OK	0.488747	1.7903	1.87304	2.09758	0.00645	0.0426741	yes
WBGene00020386	cyp-34A4	V:3950026-3952068	N2	rnp-6	OK	7.621	14.1365	0.891371	3.46159	5e-05	0.000725861	yes	GO:0004497; GO:0008395; GO:0020037; GO:0016705; GO:0005506; GO:0046872; GO:0055114; GO:0016491	oxidoreductase activity; iron ion binding; oxidoreductase activity, acting on paired donors, with incorporation or reduction of molecular oxygen; steroid hydroxylase activity; metal ion binding; heme binding; monooxygenase activity; oxidation-reduction process	protein_coding
WBGene00003768	nlp-30	V:3981979-3982745	N2	rnp-6	OK	9.42762	5.03166	-0.905859	-2.44719	5e-05	0.000725861	yes	GO:0007218; GO:0005576	extracellular region; neuropeptide signaling pathway	protein_coding
WBGene00003766	nlp-28	V:3987899-3988314	N2	rnp-6	OK	194.45	110.272	-0.818332	-3.39032	5e-05	0.000725861	yes	GO:0007218; GO:0005576	extracellular region; neuropeptide signaling pathway	protein_coding
WBGene00019564	K09D9.1	V:4025090-4026212	N2	rnp-6	OK	4.0095	2.506	-0.678039	-1.61196	0.0064	0.0424098	yes	GO:0045087	innate immune response	protein_coding
WBGene00016786	cyp-35A4	V:4031626-4033387	N2	rnp-6	OK	0.476926	1.0022	1.07134	1.85702	0.003	0.0235082	yes	GO:0004497; GO:0008395; GO:0020037; GO:0016705; GO:0009410; GO:0005506; GO:0046872; GO:0055114; GO:0016491	response to xenobiotic stimulus; oxidoreductase activity; iron ion binding; oxidoreductase activity, acting on paired donors, with incorporation or reduction of molecular oxygen; steroid hydroxylase activity; metal ion binding; heme binding; monooxygenase activity; oxidation-reduction process	protein_coding
WBGene00016785	C49G7.7	V:4034475-4038054	N2	rnp-6	OK	0.952323	0.525758	-0.857051	-1.62899	0.00715	0.0462067	yes			protein_coding
WBGene00077593	C49G7.12	V:4038820-4039934	N2	rnp-6	OK	3.34143	1.29103	-1.37195	-2.81055	5e-05	0.000725861	yes			protein_coding
WBGene00016781	C49G7.3	V:4046404-4047436	N2	rnp-6	OK	42.8426	65.8704	0.620586	2.85065	5e-05	0.000725861	yes			protein_coding
WBGene00020237	phat-4	V:4129905-4130908	N2	rnp-6	OK	0.696435	3.55685	2.35254	4.10136	5e-05	0.000725861	yes			protein_coding
WBGene00017060	D2063.1	V:4327129-4328826	N2	rnp-6	OK	12.6511	35.8206	1.50153	6.06539	5e-05	0.000725861	yes	GO:0005737; GO:0004022; GO:0006116; GO:0006067; GO:0055120; GO:0008270; GO:0005515; GO:0046872; GO:0055114; GO:0016491	ethanol metabolic process; NADH oxidation; cytoplasm; striated muscle dense body; oxidoreductase activity; zinc ion binding; metal ion binding; protein binding; alcohol dehydrogenase (NAD) activity; oxidation-reduction process	protein_coding
WBGene00015984	C18G1.6	V:4750579-4753819	N2	rnp-6	OK	0.239677	0.695217	1.53637	1.91415	0.0007	0.00728567	yes	GO:0016021; GO:0016020	integral component of membrane; membrane	protein_coding
WBGene00022013	Y60C6A.1	V:4783612-4786140	N2	rnp-6	OK	0.119136	0.830705	2.80173	2.65016	0.00325	0.0250162	yes	GO:0016021; GO:0016020	integral component of membrane; membrane	protein_coding
WBGene00020587	ugt-9	V:4896047-4897962	N2	rnp-6	OK	1.89941	0.921045	-1.04421	-2.2785	0.0001	0.00135972	yes	GO:0043231; GO:0016021; GO:0016020; GO:0016740; GO:0008152; GO:0016758; GO:0015020	transferase activity; membrane; integral component of membrane; metabolic process; glucuronosyltransferase activity; intracellular membrane-bounded organelle; transferase activity, transferring hexosyl groups	protein_coding
WBGene00019234	ugt-8	V:4903973-4905917	N2	rnp-6	OK	1.00707	0.426025	-1.24116	-2.15171	0.0013	0.0120757	yes	GO:0043231; GO:0016021; GO:0016020; GO:0016740; GO:0008152; GO:0016758; GO:0015020	transferase activity; membrane; integral component of membrane; metabolic process; glucuronosyltransferase activity; intracellular membrane-bounded organelle; transferase activity, transferring hexosyl groups	protein_coding
WBGene00005655	srr-4	V:5019223-5022369	N2	rnp-6	OK	3.96732	6.07386	0.614448	1.89302	0.00095	0.00937283	yes	GO:0008340; GO:0016021; GO:0016020	integral component of membrane; determination of adult lifespan; membrane	protein_coding
WBGene00017467	F14F9.4	V:5132740-5137100	N2	rnp-6	OK	5.42045	3.09723	-0.807433	-2.87596	5e-05	0.000725861	yes			protein_coding
WBGene00044537	B0238.15	V:5240188-5240451	N2	rnp-6	OK	8.25603	18.4136	1.15725	2.19867	0.00025	0.00303907	yes	GO:0016021; GO:0016020	integral component of membrane; membrane	protein_coding
WBGene00020256	T05C3.6	V:5490369-5493646	N2	rnp-6	OK	9.22508	5.28872	-0.802643	-2.7336	5e-05	0.000725861	yes	GO:0003824; GO:0016021; GO:0016020	catalytic activity; integral component of membrane; membrane	protein_coding
WBGene00015767	hex-2	V:5654448-5658687	N2	rnp-6	OK	17.8742	13.1105	-0.447158	-1.92464	0.00055	0.00597832	yes	GO:0005975; GO:0015929; GO:0004553	hexosaminidase activity; carbohydrate metabolic process; hydrolase activity, hydrolyzing O-glycosyl compounds	protein_coding
WBGene00017772	clec-1	V:5699946-5701082	N2	rnp-6	OK	40.8044	51.9653	0.348825	1.56838	0.00615	0.0411542	yes	GO:0030246	carbohydrate binding	protein_coding
WBGene00015423	C04E6.7	V:5893316-5895209	N2	rnp-6	OK	2.98717	4.57427	0.614761	1.65544	0.0038	0.0283741	yes	GO:0016787; GO:0008152	metabolic process; hydrolase activity	protein_coding
WBGene00017964	F31F7.1	V:6276439-6278154	N2	rnp-6	OK	121.003	98.0583	-0.303329	-1.57707	0.0061	0.040891	yes	GO:0045087; GO:0008080	innate immune response; N-acetyltransferase activity	protein_coding
WBGene00020891	T28C12.4	V:6316931-6326390	N2	rnp-6	OK	7.21118	9.47517	0.393916	1.54711	0.00725	0.0466777	yes	GO:0005575; GO:0016787; GO:0008150; GO:0052689	hydrolase activity; carboxylic ester hydrolase activity; cellular_component; biological_process	protein_coding
WBGene00019376	lipl-4	V:6550072-6551817	N2	rnp-6	OK	1.31826	0.698923	-0.915429	-1.57649	0.007	0.0454744	yes	GO:0005737; GO:0016787; GO:0016239; GO:0004806; GO:0006629; ; GO:0019433; GO:0016788; GO:0016042; GO:0010508; GO:0008340	; triglyceride lipase activity; hydrolase activity; cytoplasm; positive regulation of autophagy; hydrolase activity, acting on ester bonds; triglyceride catabolic process; determination of adult lifespan; lipid metabolic process; lipid catabolic process; positive regulation of macroautophagy	protein_coding
WBGene00000784	cpr-4	V:6614673-6615845	N2	rnp-6	OK	700.816	546.13	-0.359792	-1.91976	0.001	0.0097769	yes	GO:0016787; GO:0005615; GO:0051603; GO:0005764; GO:0004197; GO:0006508; GO:0008233; GO:0008234	extracellular space; lysosome; hydrolase activity; peptidase activity; cysteine-type endopeptidase activity; proteolysis involved in cellular protein catabolic process; proteolysis; cysteine-type peptidase activity	protein_coding
WBGene00000715	col-142	V:6831162-6832254	N2	rnp-6	OK	26.1005	46.2556	0.825551	3.5625	5e-05	0.000725861	yes	GO:0016021; GO:0016020; GO:0005581; GO:0042302	structural constituent of cuticle; collagen trimer; integral component of membrane; membrane	protein_coding
WBGene00000716	col-143	V:6835634-6836700	N2	rnp-6	OK	93.7517	121.392	0.372757	1.87956	0.0012	0.0113201	yes	GO:0016021; GO:0016020; GO:0005581; GO:0042302	structural constituent of cuticle; collagen trimer; integral component of membrane; membrane	protein_coding
WBGene00017329	ugt-39	V:7157141-7159188	N2	rnp-6	OK	4.10673	8.68324	1.08024	3.80105	5e-05	0.000725861	yes	GO:0043231; GO:0016021; GO:0016020; GO:0016740; GO:0008152; GO:0016758; GO:0015020	transferase activity; membrane; integral component of membrane; metabolic process; glucuronosyltransferase activity; intracellular membrane-bounded organelle; transferase activity, transferring hexosyl groups	protein_coding
WBGene00006237	str-204	V:7159690-7161016	N2	rnp-6	OK	0	0.526542	inf		5e-05	0.000725861	yes	GO:0038022; GO:0042048; GO:0016021; GO:0016020; GO:0050911; GO:0005887; GO:0007186	integral component of plasma membrane; G-protein coupled olfactory receptor activity; membrane; olfactory behavior; G-protein coupled receptor signaling pathway; integral component of membrane; detection of chemical stimulus involved in sensory perception of smell	protein_coding
WBGene00001428	fkb-3	V:7225368-7226314	N2	rnp-6	OK	18.8851	6.29876	-1.58411	-5.02398	5e-05	0.000725861	yes	GO:0005737; GO:0000413; GO:0006457; GO:0016853; GO:0005528; GO:0003755; GO:0061077	peptidyl-prolyl cis-trans isomerase activity; protein peptidyl-prolyl isomerization; cytoplasm; protein folding; isomerase activity; chaperone-mediated protein folding; FK506 binding	protein_coding
WBGene00017362	F10G2.1	V:7332561-7333428	N2	rnp-6	OK	33.0974	23.0025	-0.524929	-2.02624	0.00045	0.00504819	yes	GO:0016021; GO:0016020	integral component of membrane; membrane	protein_coding
WBGene00017785	F25E5.4	V:7449352-7451149	N2	rnp-6	OK	1.09068	0.555683	-0.972898	-1.83891	0.00395	0.0292687	yes	GO:0006508; GO:0004252	serine-type endopeptidase activity; proteolysis	protein_coding
WBGene00015705	nhr-152	V:7686381-7688159	N2	rnp-6	OK	1.92139	0.663896	-1.53312	-2.83169	5e-05	0.000725861	yes	GO:0043565; GO:0003700; GO:0005634; GO:0006355; GO:0008270; GO:0043401; GO:0003677; GO:0046872; GO:0006351	steroid hormone mediated signaling pathway; regulation of transcription, DNA-templated; DNA binding; zinc ion binding; nucleus; metal ion binding; sequence-specific DNA binding; transcription, DNA-templated; DNA binding transcription factor activity	protein_coding
WBGene00022653	ZK105.1	V:7713989-7714700	N2	rnp-6	OK	46.2938	32.0056	-0.532496	-2.08088	0.00035	0.00407043	yes			protein_coding
WBGene00022410	Y97E10C.1	V:7728812-7730028	N2	rnp-6	OK	3.7738	6.08958	0.690323	1.85037	0.00135	0.0124346	yes			protein_coding
WBGene00001152	ech-3	V:8022293-8024923	N2	rnp-6	OK	17.5543	9.76882	-0.845568	-1.80281	0.00305	0.0238181	yes	GO:0003824; GO:0008152	metabolic process; catalytic activity	protein_coding
WBGene00015660	catp-3	V:8076084-8079914	N2	rnp-6	OK	13.621	25.5702	0.90863	4.38013	5e-05	0.000725861	yes	GO:0016787; GO:0016021; GO:0016020; GO:0000166; GO:0046872; GO:0005524	hydrolase activity; ATP binding; membrane; nucleotide binding; integral component of membrane; metal ion binding	protein_coding
WBGene00019064	myo-5	V:8109050-8118130	N2	rnp-6	OK	9.2225	11.8637	0.363325	1.7714	0.00195	0.0167396	yes	GO:0048193; GO:0016020; GO:0000166; GO:0003779; GO:0016459; GO:0003774; GO:0005524	myosin complex; motor activity; actin binding; ATP binding; membrane; nucleotide binding; Golgi vesicle transport	protein_coding
WBGene00019477	K07C11.4	V:8203440-8205985	N2	rnp-6	OK	12.3531	9.07741	-0.444524	-1.79723	0.00105	0.0101691	yes	GO:0016787; GO:0052689	hydrolase activity; carboxylic ester hydrolase activity	protein_coding
WBGene00017678	asp-12	V:8269253-8272058	N2	rnp-6	OK	50.8594	30.5405	-0.735792	-3.3833	5e-05	0.000725861	yes	GO:0016787; GO:0045087; GO:0004190; GO:0030163; GO:0006508; GO:0008233	innate immune response; aspartic-type endopeptidase activity; hydrolase activity; peptidase activity; protein catabolic process; proteolysis	protein_coding
WBGene00000218	asp-5	V:8272374-8274047	N2	rnp-6	OK	956.715	570.576	-0.745671	-3.9888	5e-05	0.000725861	yes	GO:0016787; GO:0008233; GO:0004190; GO:0030163; GO:0006508	hydrolase activity; peptidase activity; proteolysis; aspartic-type endopeptidase activity; protein catabolic process	protein_coding
WBGene00015592	C08D8.1	V:8345758-8349909	N2	rnp-6	OK	2.54834	1.1854	-1.10418	-2.45563	0.0002	0.00250605	yes	GO:0016021; GO:0016020	integral component of membrane; membrane	protein_coding
WBGene00001881	his-7	V:8533378-8533762	N2	rnp-6	OK	258.049	173.592	-0.571945	-2.64194	5e-05	0.000725861	yes	GO:0006281; GO:0006342; GO:0005634; GO:0000786; GO:0006355; GO:0000790; GO:0003677; GO:0046982; GO:0005694	nuclear chromatin; nucleosome; regulation of transcription, DNA-templated; DNA binding; chromatin silencing; protein heterodimerization activity; nucleus; DNA repair; chromosome	protein_coding
WBGene00007055	tag-196	V:8594913-8597563	N2	rnp-6	OK	79.5961	59.2718	-0.425352	-2.15577	0.0002	0.00250605	yes	GO:0016787; GO:0005615; GO:0051603; GO:0005764; GO:0004197; GO:0004869; GO:0010951; GO:0006508; GO:0008233; GO:0008234	extracellular space; cysteine-type endopeptidase inhibitor activity; lysosome; hydrolase activity; peptidase activity; cysteine-type endopeptidase activity; proteolysis involved in cellular protein catabolic process; proteolysis; cysteine-type peptidase activity; negative regulation of endopeptidase activity	protein_coding
WBGene00001694	grd-5	V:8619031-8619869	N2	rnp-6	OK	34.1112	22.6092	-0.593338	-2.06006	0.0006	0.00643061	yes	GO:0009792; GO:0007154; GO:0005102; GO:0005576	extracellular region; cell communication; embryo development ending in birth or egg hatching; receptor binding	protein_coding
WBGene00000541	cln-3.3	V:8682964-8686162	N2	rnp-6	OK	1.75212	0.74914	-1.2258	-2.36733	0.0001	0.00135972	yes	GO:0007034; GO:0016021; GO:0016020; GO:0005764; GO:0005765; GO:0003674; GO:0007040; GO:0051453; GO:0008340; GO:0015809; GO:0046662	regulation of oviposition; molecular_function; integral component of membrane; lysosome organization; lysosomal membrane; determination of adult lifespan; membrane; lysosome; vacuolar transport; arginine transport; regulation of intracellular pH	protein_coding
WBGene00001923	his-49	V:8847942-8848353	N2	rnp-6	OK	94.3155	7.97055	-3.56474	-8.30968	5e-05	0.000725861	yes	GO:0005634; GO:0003677; GO:0031492; GO:0000786; GO:0046982; GO:0005694; GO:0006334	nucleosome; DNA binding; protein heterodimerization activity; nucleosome assembly; nucleus; nucleosomal DNA binding; chromosome	protein_coding
WBGene00001926	his-52	V:8850463-8850835	N2	rnp-6	OK	75.2672	20.6289	-1.86735	-6.13267	5e-05	0.000725861	yes	GO:0000786; GO:0005634; GO:0005811; GO:0035267; GO:0003677; GO:0046982; GO:0005694; GO:0006334	nucleosome; DNA binding; lipid droplet; NuA4 histone acetyltransferase complex; protein heterodimerization activity; nucleosome assembly; nucleus; chromosome	protein_coding
WBGene00001927	his-53	V:8853669-8854053	N2	rnp-6	OK	83.959	21.4027	-1.97189	-5.6549	5e-05	0.000725861	yes	GO:0006281; GO:0006342; GO:0005634; GO:0000786; GO:0006355; GO:0000790; GO:0003677; GO:0046982; GO:0005694	nuclear chromatin; nucleosome; regulation of transcription, DNA-templated; DNA binding; chromatin silencing; protein heterodimerization activity; nucleus; DNA repair; chromosome	protein_coding
WBGene00001893	his-19	V:8895764-8896148	N2	rnp-6	OK	20.4906	32.8565	0.681217	1.99194	0.00015	0.00195025	yes	GO:0006281; GO:0006342; GO:0005634; GO:0000786; GO:0006355; GO:0000790; GO:0003677; GO:0046982; GO:0005694	nuclear chromatin; nucleosome; regulation of transcription, DNA-templated; DNA binding; chromatin silencing; protein heterodimerization activity; nucleus; DNA repair; chromosome	protein_coding
WBGene00019203	ttr-47	V:8923087-8928938	N2	rnp-6	OK	85.2582	57.4187	-0.570318	-2.16683	0.0001	0.00135972	yes	GO:0005615	extracellular space	protein_coding
WBGene00016095	C25E10.5	V:9030547-9032598	N2	rnp-6	OK	2.54186	4.67133	0.877952	2.63656	5e-05	0.000725861	yes	GO:0016021; GO:0016020	integral component of membrane; membrane	protein_coding
WBGene00017659	F21C10.10	V:9096006-9098696	N2	rnp-6	OK	47.9359	73.2348	0.611425	2.66571	5e-05	0.000725861	yes	GO:0005739	mitochondrion	protein_coding
WBGene00004119	pqn-31	V:9109602-9111019	N2	rnp-6	OK	8.12614	13.7279	0.756468	2.71579	5e-05	0.000725861	yes			protein_coding
WBGene00017657	F21C10.7	V:9112789-9122180	N2	rnp-6	OK	4.91201	6.24891	0.34729	1.60557	0.00555	0.0380172	yes	GO:0005515	protein binding	protein_coding
WBGene00010593	gsnl-1	V:9497050-9499378	N2	rnp-6	OK	9.4807	14.9906	0.660993	2.62418	5e-05	0.000725861	yes	GO:0005856; GO:0005737; GO:0030042; GO:0015629; GO:1905808; GO:0045010; GO:0051016; GO:0051015; GO:0051014; GO:0003779; GO:0055120; GO:0005509; GO:0051693; GO:0005546; GO:0003785	calcium ion binding; actin filament binding; actin filament capping; barbed-end actin filament capping; actin nucleation; actin binding; cytoplasm; striated muscle dense body; actin filament severing; actin monomer binding; phosphatidylinositol-4,5-bisphosphate binding; positive regulation of synapse disassembly; cytoskeleton; actin cytoskeleton; actin filament depolymerization	protein_coding
WBGene00008669	acs-14	V:9508096-9510719	N2	rnp-6	OK	67.6392	53.6652	-0.333871	-1.67792	0.0033	0.025334	yes	GO:0003824; GO:0008152	metabolic process; catalytic activity	protein_coding
WBGene00008229	C50F4.1	V:9526732-9529250	N2	rnp-6	OK	69.0647	55.4223	-0.317481	-1.55038	0.00685	0.0447412	yes			protein_coding
WBGene00001915	C50F4.6,his-41	V:9545521-9546838	N2	rnp-6	OK	114.128	90.2244	-0.339065	-1.5324	0.00785	0.0494531	yes	GO:0000786; GO:0005634; GO:0005811; GO:0035267; GO:0003677; GO:0046982; GO:0005694; GO:0006334	nucleosome; DNA binding; lipid droplet; NuA4 histone acetyltransferase complex; protein heterodimerization activity; nucleosome assembly; nucleus; chromosome	protein_coding
WBGene00001910	C50F4.6,his-41	V:9545521-9546838	N2	rnp-6	OK	114.128	90.2244	-0.339065	-1.5324	0.00785	0.0494531	yes			protein_coding
WBGene00010727	K09G1.1	V:9583595-9590523	N2	rnp-6	OK	31.373	23.7392	-0.402255	-1.64842	0.0051	0.0356206	yes	GO:0016021; GO:0016020	integral component of membrane; membrane	protein_coding
WBGene00000719	col-146	V:9629942-9631011	N2	rnp-6	OK	0.458836	1.06819	1.21912	1.65978	0.00745	0.0476127	yes	GO:0016021; GO:0016020; GO:0005581; GO:0042302	structural constituent of cuticle; collagen trimer; integral component of membrane; membrane	protein_coding
WBGene00010256	hrg-3	V:9756466-9757986	N2	rnp-6	OK	2.94232	11.6268	1.98243	3.80179	5e-05	0.000725861	yes	GO:0050829; GO:0015886; GO:0005615; GO:0020037; GO:0015232	heme binding; extracellular space; heme transporter activity; defense response to Gram-negative bacterium; heme transport	protein_coding
WBGene00009773	lipl-2	V:9791570-9793391	N2	rnp-6	OK	11.2088	4.74751	-1.23939	-4.18426	5e-05	0.000725861	yes	GO:0016787; GO:0006629; GO:0016788; GO:0016042	hydrolase activity; lipid catabolic process; lipid metabolic process; hydrolase activity, acting on ester bonds	protein_coding
WBGene00010177	F57A8.1	V:10037339-10048674	N2	rnp-6	OK	9.00073	4.53654	-0.988451	-3.48636	5e-05	0.000725861	yes			protein_coding
WBGene00011003	R04B5.5	V:10087488-10089000	N2	rnp-6	OK	18.6438	14.1489	-0.398008	-1.54449	0.0073	0.0469136	yes	GO:0046872; GO:0008270; GO:0055114; GO:0016491	zinc ion binding; metal ion binding; oxidoreductase activity; oxidation-reduction process	protein_coding
WBGene00003090	lys-1	V:10277826-10279127	N2	rnp-6	OK	113.32	161.437	0.510573	2.60891	5e-05	0.000725861	yes	GO:0045177; GO:0031410; GO:0045087; GO:0002376; GO:0050830; GO:0060205; GO:0050829	innate immune response; apical part of cell; cytoplasmic vesicle lumen; cytoplasmic vesicle; immune system process; defense response to Gram-positive bacterium; defense response to Gram-negative bacterium	protein_coding
WBGene00007071	AC3.5	V:10388469-10393503	N2	rnp-6	OK	13.6454	10.3562	-0.397926	-1.82646	0.00115	0.01096	yes	GO:0005737; GO:0042277; GO:0016021; GO:0016020; GO:0043171; GO:0008270; GO:0070006; GO:0006508; GO:0008237	peptide binding; metalloaminopeptidase activity; cytoplasm; zinc ion binding; peptide catabolic process; membrane; metallopeptidase activity; proteolysis; integral component of membrane	protein_coding
WBGene00007072	ugt-1	V:10395676-10397817	N2	rnp-6	OK	4.17601	2.91873	-0.516782	-1.56101	0.00775	0.0489842	yes	GO:0043231; GO:0016021; GO:0016020; GO:0016740; GO:0008152; GO:0016758; GO:0015020	transferase activity; membrane; integral component of membrane; metabolic process; glucuronosyltransferase activity; intracellular membrane-bounded organelle; transferase activity, transferring hexosyl groups	protein_coding
WBGene00007073	ugt-2	V:10398809-10401313	N2	rnp-6	OK	4.14131	2.53446	-0.708411	-2.06379	0.0006	0.00643061	yes	GO:0043231; GO:0016021; GO:0016020; GO:0016740; GO:0008152; GO:0016758; GO:0015020	transferase activity; membrane; integral component of membrane; metabolic process; glucuronosyltransferase activity; intracellular membrane-bounded organelle; transferase activity, transferring hexosyl groups	protein_coding
WBGene00007950	C35A5.6	V:10509055-10510480	N2	rnp-6	OK	17.3537	8.40999	-1.04507	-3.2952	5e-05	0.000725861	yes	; GO:0005576	extracellular region;	protein_coding
WBGene00011893	T21C9.6	V:10581886-10587118	N2	rnp-6	OK	9.19093	3.7025	-1.31171	-5.32386	5e-05	0.000725861	yes	GO:0016310; GO:0016772; GO:0016301; GO:0005524; GO:0003824	kinase activity; transferase activity, transferring phosphorus-containing groups; ATP binding; phosphorylation; catalytic activity	protein_coding
WBGene00220253	C05A2.4	V:10695480-10695612	N2	rnp-6	OK	0	6.88411	inf		0.00145	0.013173	yes			protein_coding
WBGene00008378	D1054.11	V:10793794-10794924	N2	rnp-6	OK	522.626	667.956	0.353976	1.88628	0.00125	0.0117015	yes			protein_coding
WBGene00000063	act-1	V:11079166-11082497	N2	rnp-6	OK	74.9056	112.263	0.583741	2.98911	5e-05	0.000725861	yes	GO:0005856; GO:0005737; GO:0030866; GO:0000166; GO:0009792; GO:0000281; GO:0005865; GO:0005524	embryo development ending in birth or egg hatching; cortical actin cytoskeleton organization; cytoplasm; striated muscle thin filament; mitotic cytokinesis; ATP binding; cytoskeleton; nucleotide binding	protein_coding
WBGene00011838	T19C4.1	V:11149706-11151319	N2	rnp-6	OK	3.76193	1.11616	-1.75293	-4.01974	5e-05	0.000725861	yes	GO:0016021; GO:0016020	integral component of membrane; membrane	protein_coding
WBGene00011831	T19B10.2	V:11221301-11226011	N2	rnp-6	OK	40.5867	55.8748	0.46119	1.93319	0.0007	0.00728567	yes			protein_coding
WBGene00007283	clec-222	V:11271350-11272469	N2	rnp-6	OK	12.9138	8.92908	-0.532326	-1.71831	0.00325	0.0250162	yes	GO:0030246	carbohydrate binding	protein_coding
WBGene00011383	T02E9.5	V:11342230-11344735	N2	rnp-6	OK	29.3054	18.2591	-0.682548	-2.19809	0.00025	0.00303907	yes			protein_coding
WBGene00003248	mig-17	V:11446651-11450357	N2	rnp-6	OK	3.81521	2.04775	-0.897719	-2.37493	0.00025	0.00303907	yes	GO:0016787; GO:0005604; GO:0004222; GO:0005615; GO:0016540; GO:0031638; GO:0030334; GO:0007275; GO:0035262; GO:0005576; GO:0006508; GO:0008233; GO:0046872; GO:0005578; GO:0008237; GO:1903354	regulation of distal tip cell migration; extracellular space; regulation of cell migration; extracellular region; zymogen activation; metalloendopeptidase activity; peptidase activity; basement membrane; hydrolase activity; multicellular organism development; metal ion binding; protein autoprocessing; metallopeptidase activity; proteolysis; proteinaceous extracellular matrix; gonad morphogenesis	protein_coding
WBGene00009532	ccch-1	V:11527830-11541211	N2	rnp-6	OK	9.50506	12.7558	0.424386	1.82292	0.00155	0.013881	yes	GO:0061158; GO:0005829; GO:0046872; GO:0003730; GO:0016529	mRNA 3'-UTR binding; cytosol; sarcoplasmic reticulum; 3'-UTR-mediated mRNA destabilization; metal ion binding	protein_coding
WBGene00003658	nhr-68	V:11573439-11575869	N2	rnp-6	OK	13.7141	25.7921	0.911268	3.43704	5e-05	0.000725861	yes	GO:0043565; GO:0003700; GO:0005634; GO:0006355; GO:0008270; GO:0043401; GO:0003677; GO:0046872; GO:0006351	steroid hormone mediated signaling pathway; regulation of transcription, DNA-templated; DNA binding; zinc ion binding; nucleus; metal ion binding; sequence-specific DNA binding; transcription, DNA-templated; DNA binding transcription factor activity	protein_coding
WBGene00044631	bus-18	V:11773719-11776631	N2	rnp-6	OK	0.845835	0.240745	-1.81287	-2.42693	0.00085	0.00858204	yes	GO:0002009; GO:0005783; GO:0016021; GO:0016020; GO:0046488; GO:0008152; GO:0016746	endoplasmic reticulum; metabolic process; transferase activity, transferring acyl groups; membrane; morphogenesis of an epithelium; integral component of membrane; phosphatidylinositol metabolic process	protein_coding
WBGene00010286	F58H1.3	V:11933880-11935055	N2	rnp-6	OK	63.4811	48.9158	-0.376027	-1.7017	0.00305	0.0238181	yes	GO:0005737; GO:0016787; GO:0009086; GO:0019509; GO:0008652; GO:0016311; GO:0005634; GO:0000287; GO:0008152; GO:0046872; GO:0043874	L-methionine salvage from methylthioadenosine; cellular amino acid biosynthetic process; magnesium ion binding; hydrolase activity; cytoplasm; acireductone synthase activity; methionine biosynthetic process; metabolic process; nucleus; metal ion binding; dephosphorylation	protein_coding
WBGene00003726	nhr-136	V:12107141-12109137	N2	rnp-6	OK	2.89135	4.48264	0.632605	1.83285	0.0022	0.0184426	yes	GO:0043565; GO:0042594; GO:0003700; GO:0005634; GO:0006355; GO:0008270; GO:0043401; GO:0003677; GO:0046872; GO:0006351	steroid hormone mediated signaling pathway; regulation of transcription, DNA-templated; DNA binding; zinc ion binding; response to starvation; nucleus; metal ion binding; sequence-specific DNA binding; transcription, DNA-templated; DNA binding transcription factor activity	protein_coding
WBGene00007758	C27A7.8	V:12153075-12154654	N2	rnp-6	OK	11.6247	7.43595	-0.64461	-1.6834	0.0047	0.0334361	yes			protein_coding
WBGene00011452	ugt-55	V:12255621-12258793	N2	rnp-6	OK	0.742811	0.295397	-1.33034	-2.12626	0.0012	0.0113201	yes	GO:0008152; GO:0016021; GO:0016020; GO:0016740; GO:0016757; GO:0016758; GO:0015020; GO:0043231	transferase activity, transferring glycosyl groups; transferase activity; membrane; transferase activity, transferring hexosyl groups; metabolic process; glucuronosyltransferase activity; intracellular membrane-bounded organelle; integral component of membrane	protein_coding
WBGene00006539	tbb-6	V:12261803-12263845	N2	rnp-6	OK	1.47095	2.38223	0.69556	1.63671	0.0054	0.0372683	yes	GO:0007017; GO:0007010; GO:0003924; GO:0000166; GO:0005200; GO:0005874; GO:0005525	structural constituent of cytoskeleton; microtubule-based process; microtubule; GTPase activity; GTP binding; cytoskeleton organization; nucleotide binding	protein_coding
WBGene00001493	frm-7	V:12302483-12306972	N2	rnp-6	OK	91.9947	24.9692	-1.8814	-12.7121	5e-05	0.000725861	yes	GO:0005856	cytoskeleton	protein_coding
WBGene00219860	frm-7	V:12302483-12306972	N2	rnp-6	OK	91.9947	24.9692	-1.8814	-12.7121	5e-05	0.000725861	yes
WBGene00005018	sqt-3	V:12352993-12354314	N2	rnp-6	OK	55.2696	20.4919	-1.43143	-6.0631	5e-05	0.000725861	yes	GO:0040002; GO:0005581; GO:0042338; GO:0005576; GO:0060102; GO:0042302	collagen and cuticulin-based cuticle development; cuticle development involved in collagen and cuticulin-based cuticle molting cycle; extracellular region; collagen and cuticulin-based cuticle extracellular matrix; structural constituent of cuticle; collagen trimer	protein_coding
WBGene00000228	atn-1	V:12478412-12484452	N2	rnp-6	OK	28.211	38.2195	0.438053	2.22217	5e-05	0.000725861	yes	GO:0003779; GO:0005865; GO:0055120; GO:0005509; GO:0005515	calcium ion binding; protein binding; striated muscle thin filament; striated muscle dense body; actin binding	protein_coding
WBGene00012142	T28H10.1	V:12503798-12506260	N2	rnp-6	OK	7.75293	5.00636	-0.630979	-1.89822	0.00135	0.0124346	yes	GO:0019878; GO:0008897; GO:0000287	holo-[acyl-carrier-protein] synthase activity; lysine biosynthetic process via aminoadipic acid; magnesium ion binding	protein_coding
WBGene00010174	F56H9.2	V:12637660-12638238	N2	rnp-6	OK	750.366	594.713	-0.335402	-1.71294	0.0034	0.0259387	yes			protein_coding
WBGene00013900	ugt-18	V:12820264-12822758	N2	rnp-6	OK	4.1153	1.93101	-1.09164	-3.02127	5e-05	0.000725861	yes	GO:0008152; GO:0016021; GO:0016020; GO:0016740; GO:0016757; GO:0016758; GO:0015020; GO:0043231	transferase activity, transferring glycosyl groups; transferase activity; membrane; transferase activity, transferring hexosyl groups; metabolic process; glucuronosyltransferase activity; intracellular membrane-bounded organelle; integral component of membrane	protein_coding
WBGene00011587	T07F10.1	V:12859380-12867917	N2	rnp-6	OK	16.014	12.1661	-0.396473	-1.81671	0.00145	0.013173	yes	GO:0005737; GO:0016787; GO:0042277; GO:0004177; GO:0016021; GO:0016020; GO:0043171; GO:0008270; GO:0070006; GO:0006508; GO:0008233; GO:0046872; GO:0008237	peptide binding; metalloaminopeptidase activity; aminopeptidase activity; hydrolase activity; cytoplasm; peptide catabolic process; zinc ion binding; peptidase activity; metal ion binding; membrane; metallopeptidase activity; proteolysis; integral component of membrane	protein_coding
WBGene00003738	nid-1	V:12910112-12917221	N2	rnp-6	OK	11.7904	8.14412	-0.53378	-2.4231	5e-05	0.000725861	yes	GO:0005201; GO:0005604; GO:0016021; GO:0016020; GO:0045178; GO:0097376; GO:0007160; GO:0050808; GO:0001764; GO:0005509; GO:0005515; GO:0007271; GO:0035418	calcium ion binding; synapse organization; basal part of cell; protein localization to synapse; protein binding; membrane; synaptic transmission, cholinergic; cell-matrix adhesion; basement membrane; neuron migration; interneuron axon guidance; extracellular matrix structural constituent; integral component of membrane	protein_coding
WBGene00003031	lin-46	V:12968852-12970732	N2	rnp-6	OK	0.882338	0.195115	-2.17701	-2.6905	0.0007	0.00728567	yes	GO:0005737; GO:0006777; GO:0061599; GO:0061598; GO:0005634; GO:0018315; GO:0032947; GO:0032324; GO:0040034	regulation of development, heterochronic; molybdenum incorporation into molybdenum-molybdopterin complex; cytoplasm; molybdopterin cofactor biosynthetic process; protein complex scaffold activity; Mo-molybdopterin cofactor biosynthetic process; nucleus; molybdopterin molybdotransferase activity; molybdopterin adenylyltransferase activity	protein_coding
WBGene00008851	F15B9.8	V:12988531-12992186	N2	rnp-6	OK	6.70484	1.589	-2.07708	-3.94353	5e-05	0.000725861	yes			protein_coding
WBGene00001475	fmi-1	V:13019067-13033399	N2	rnp-6	OK	3.67546	1.67711	-1.13194	-4.241	5e-05	0.000725861	yes	GO:0033564; GO:0004930; GO:0016021; GO:0016020; GO:0097376; GO:0030424; GO:0005509; GO:0005515; GO:0005886; GO:0007155; GO:0007156; GO:0007186	calcium ion binding; protein binding; homophilic cell adhesion via plasma membrane adhesion molecules; axon; interneuron axon guidance; G-protein coupled receptor activity; membrane; cell adhesion; G-protein coupled receptor signaling pathway; anterior/posterior axon guidance; integral component of membrane; plasma membrane	protein_coding
WBGene00010189	F57B1.6	V:13209644-13213462	N2	rnp-6	OK	1.72112	0.749838	-1.19869	-1.72779	0.00435	0.0315234	yes	GO:0016021; GO:0016020	integral component of membrane; membrane	protein_coding
WBGene00000789	cpz-2	V:13381188-13385898	N2	rnp-6	OK	67.2704	48.2411	-0.479707	-2.37829	5e-05	0.000725861	yes	GO:0051603; GO:0005615; GO:0005764; GO:0004197; GO:0006508; GO:0008234	extracellular space; lysosome; cysteine-type endopeptidase activity; proteolysis involved in cellular protein catabolic process; proteolysis; cysteine-type peptidase activity	protein_coding
WBGene00009981	F53F1.3	V:13408241-13409832	N2	rnp-6	OK	23.8437	12.0419	-0.985546	-3.60393	5e-05	0.000725861	yes	GO:0055114; GO:0016491	oxidation-reduction process; oxidoreductase activity	protein_coding
WBGene00009982	F53F1.4	V:13411076-13411714	N2	rnp-6	OK	1.03846	2.66209	1.35811	1.92262	0.0024	0.0197654	yes			protein_coding
WBGene00012381	Y2H9A.4	V:13445744-13448815	N2	rnp-6	OK	0.811658	1.78046	1.13331	2.49421	5e-05	0.000725861	yes	GO:0016021; GO:0016020	integral component of membrane; membrane	protein_coding
WBGene00011328	T01D3.3	V:13704928-13711090	N2	rnp-6	OK	0.882583	0.444902	-0.988245	-2.03106	0.001	0.0097769	yes	GO:0010466; GO:0006801; GO:0030414; GO:0046872; GO:0055114; GO:0005576	peptidase inhibitor activity; superoxide metabolic process; extracellular region; negative regulation of peptidase activity; oxidation-reduction process; metal ion binding	protein_coding
WBGene00044921	F53C11.9	V:13778014-13778592	N2	rnp-6	OK	12.8628	7.31846	-0.813589	-1.96897	0.0015	0.0135324	yes			protein_coding
WBGene00014732	F09F3.8	V:13869887-13872529	N2	rnp-6	OK	1.03356	2.09826	1.02158	2.63476	5e-05	0.000725861	yes
WBGene00008629	cpt-5	V:13873171-13875878	N2	rnp-6	OK	9.53551	31.0208	1.70185	7.54918	5e-05	0.000725861	yes	GO:0016740; GO:0016746	transferase activity; transferase activity, transferring acyl groups	protein_coding
WBGene00002259	lbp-7	V:13879549-13880214	N2	rnp-6	OK	41.342	27.8893	-0.567899	-2.0178	0.0006	0.00643061	yes	GO:0005215; GO:0006810; GO:0008289	transporter activity; lipid binding; transport	protein_coding
WBGene00004997	spp-12	V:13889868-13890319	N2	rnp-6	OK	2.21291	14.6498	2.72686	4.85621	5e-05	0.000725861	yes	GO:0046930; GO:0015267; GO:0009405; GO:0055085; GO:0035915	pore complex; channel activity; pore formation in membrane of other organism; transmembrane transport; pathogenesis	protein_coding
WBGene00007366	C06B3.7	V:13909747-13911524	N2	rnp-6	OK	3.35375	1.55079	-1.11277	-2.35705	0.00035	0.00407043	yes			protein_coding
WBGene00011194	R10D12.13,sao-1	V:13962416-13965705	N2	rnp-6	OK	98.8974	124.597	0.333261	1.66633	0.0036	0.0271525	yes	; GO:0005686	; U2 snRNP	protein_coding
WBGene00011195	R10D12.13,sao-1	V:13962416-13965705	N2	rnp-6	OK	98.8974	124.597	0.333261	1.66633	0.0036	0.0271525	yes	GO:0005737; GO:0007219; GO:0032154; GO:0060625; GO:0045746; GO:0071987; GO:0005938; GO:0005515; GO:0007275	WD40-repeat domain binding; regulation of protein deneddylation; cleavage furrow; negative regulation of Notch signaling pathway; protein binding; cell cortex; cytoplasm; multicellular organism development; Notch signaling pathway	protein_coding
WBGene00008393	D1086.6	V:14079800-14081766	N2	rnp-6	OK	32.4177	55.0655	0.764369	3.49404	5e-05	0.000725861	yes			protein_coding
WBGene00008394	D1086.7	V:14084269-14085498	N2	rnp-6	OK	51.0853	29.3605	-0.799031	-3.3124	5e-05	0.000725861	yes	GO:0016021; GO:0016020	integral component of membrane; membrane	protein_coding
WBGene00044082	D1086.12	V:14101253-14102834	N2	rnp-6	OK	12.8868	7.59954	-0.761905	-2.30424	5e-05	0.000725861	yes			protein_coding
WBGene00011793	T16A9.3	V:14206242-14209012	N2	rnp-6	OK	0.600576	1.17185	0.964369	1.63661	0.0056	0.0382788	yes	; GO:0005515	; protein binding	protein_coding
WBGene00009809	F47B8.8	V:14331708-14332669	N2	rnp-6	OK	14.6141	8.3321	-0.810612	-2.51259	5e-05	0.000725861	yes	GO:0008270; GO:0008237	metallopeptidase activity; zinc ion binding	protein_coding
WBGene00008596	clec-54	V:14476910-14478997	N2	rnp-6	OK	14.8293	6.95215	-1.09292	-3.86446	5e-05	0.000725861	yes	GO:0030246	carbohydrate binding	protein_coding
WBGene00008270	C53A5.13	V:14546920-14554540	N2	rnp-6	OK	2.95988	1.17411	-1.33397	-3.51471	5e-05	0.000725861	yes	GO:0016021; GO:0016020; GO:0005515	protein binding; integral component of membrane; membrane	protein_coding
WBGene00010386	H12D21.10	V:14899795-14911867	N2	rnp-6	OK	3.03095	1.93972	-0.643921	-1.66809	0.00395	0.0292687	yes	GO:0016757	transferase activity, transferring glycosyl groups	protein_coding
WBGene00011321	fil-1	V:14993908-14995201	N2	rnp-6	OK	2.43175	4.17703	0.780482	2.06831	0.0005	0.00551085	yes	GO:0016787; GO:0016298; GO:0016042	hydrolase activity; lipase activity; lipid catabolic process	protein_coding
WBGene00007231	C01G10.4	V:15089754-15090021	N2	rnp-6	OK	0	2.12093	inf		0.0001	0.00135972	yes			protein_coding
WBGene00011668	clec-47	V:15175695-15176326	N2	rnp-6	OK	51.1348	21.344	-1.26047	-4.46088	5e-05	0.000725861	yes	GO:0016021; GO:0016020; GO:0030246	carbohydrate binding; integral component of membrane; membrane	protein_coding
WBGene00010799	chil-12	V:15241583-15243943	N2	rnp-6	OK	0.930315	0.434872	-1.09713	-1.72833	0.0056	0.0382788	yes	GO:0005737; GO:0005975; GO:0016021; GO:0016020; GO:0005576; GO:0008061; GO:0004553; GO:0004568; GO:0006032	hydrolase activity, hydrolyzing O-glycosyl compounds; extracellular region; cytoplasm; carbohydrate metabolic process; chitin catabolic process; membrane; chitinase activity; chitin binding; integral component of membrane	protein_coding
WBGene00007807	C29F3.7	V:15354832-15357572	N2	rnp-6	OK	82.1333	43.2352	-0.925761	-4.66275	5e-05	0.000725861	yes	; GO:0045087; GO:0045121	; innate immune response; membrane raft	protein_coding
WBGene00000868	cyb-3	V:15395695-15397348	N2	rnp-6	OK	405.176	506.917	0.323201	1.72493	0.00255	0.0206975	yes	GO:0005737; GO:0000079; GO:0000070; GO:0051321; GO:0000278; GO:0051445; GO:0035046; GO:0005634; GO:0001556; GO:0019901; GO:0016538; GO:0045842; GO:0007098; GO:0007049; GO:0051383; GO:0010389; GO:0045144; GO:0001934; GO:0051301	mitotic cell cycle; kinetochore organization; cyclin-dependent protein serine/threonine kinase regulator activity; protein kinase binding; cell division; cytoplasm; positive regulation of protein phosphorylation; meiotic sister chromatid segregation; centrosome cycle; nucleus; pronuclear migration; meiotic cell cycle; regulation of meiotic cell cycle; cell cycle; mitotic sister chromatid segregat…	protein_coding
WBGene00044206	T26H5.9	V:15444909-15445372	N2	rnp-6	OK	90.6541	164.1	0.856135	3.15451	5e-05	0.000725861	yes			protein_coding
WBGene00235133	T26H5.14	V:15449164-15449601	N2	rnp-6	OK	2.28785	6.11817	1.4191	2.24304	0.00035	0.00407043	yes			protein_coding
WBGene00009221	acs-2	V:15567393-15569889	N2	rnp-6	OK	19.2986	50.6125	1.391	6.59281	5e-05	0.000725861	yes	GO:0003824; GO:0006631; GO:0005739; GO:0008152	metabolic process; catalytic activity; fatty acid metabolic process; mitochondrion	protein_coding
WBGene00010019	F54B8.4	V:15816463-15817143	N2	rnp-6	OK	14.5039	9.40477	-0.624973	-1.53511	0.00785	0.0494531	yes	GO:0070513; GO:0045087; GO:0097190; GO:0010507; GO:0034198	negative regulation of autophagy; innate immune response; cellular response to amino acid starvation; death domain binding; apoptotic signaling pathway	protein_coding
WBGene00009485	F36G9.3	V:15957421-15959530	N2	rnp-6	OK	1.96864	0.685387	-1.52221	-2.81793	5e-05	0.000725861	yes	GO:0016021; GO:0016020	integral component of membrane; membrane	protein_coding
WBGene00001875	his-1	V:16042519-16042831	N2	rnp-6	OK	1130.91	895.068	-0.337412	-1.75703	0.0025	0.0203879	yes	GO:0042393; GO:0005634; GO:0003677; GO:0000786; GO:0000788; GO:0046982; GO:0005694; GO:0006334	nucleosome; histone binding; DNA binding; protein heterodimerization activity; nucleosome assembly; nuclear nucleosome; nucleus; chromosome	protein_coding
WBGene00009048	cth-1	V:16100654-16102744	N2	rnp-6	OK	5.89657	8.49272	0.52635	1.78987	0.0018	0.0156835	yes	GO:0005737; GO:0019346; GO:0016829; GO:0071266; GO:0003824; GO:0019343; GO:0030170; GO:0004123; GO:0003962	cysteine biosynthetic process via cystathionine; pyridoxal phosphate binding; lyase activity; cytoplasm; 'de novo' L-methionine biosynthetic process; cystathionine gamma-synthase activity; cystathionine gamma-lyase activity; transsulfuration; catalytic activity	protein_coding
WBGene00001591	glc-1	V:16219608-16221916	N2	rnp-6	OK	33.9003	20.4798	-0.727099	-3.26636	5e-05	0.000725861	yes	GO:0031987; GO:0051259; GO:0006810; GO:1902476; GO:0005230; GO:0016020; GO:0005216; GO:0060079; GO:0045211; GO:0045202; GO:0005887; GO:0005886; GO:0006811; GO:0016595; GO:0008068; GO:0016021; GO:0030054	excitatory postsynaptic potential; ion transport; synapse; protein oligomerization; chloride transmembrane transport; postsynaptic membrane; integral component of plasma membrane; ion channel activity; cell junction; extracellular ligand-gated ion channel activity; extracellularly glutamate-gated chloride channel activity; transport; locomotion involved in locomotory behavior; membrane; integral …	protein_coding
WBGene00003717	nhr-127	V:16261646-16263891	N2	rnp-6	OK	0.89743	0.222752	-2.01036	-2.92508	0.0002	0.00250605	yes	GO:0043565; GO:0003700; GO:0005634; GO:0006355; GO:0008270; GO:0043401; GO:0003677; GO:0046872; GO:0006351	steroid hormone mediated signaling pathway; regulation of transcription, DNA-templated; DNA binding; zinc ion binding; nucleus; metal ion binding; sequence-specific DNA binding; transcription, DNA-templated; DNA binding transcription factor activity	protein_coding
WBGene00009226	cyp-37B1	V:16278190-16280614	N2	rnp-6	OK	23.2935	15.7324	-0.566187	-2.44569	5e-05	0.000725861	yes	GO:0004497; GO:0016705; GO:0020037; GO:0016021; GO:0016020; GO:0050830; GO:0005506; GO:0046872; GO:0055114; GO:0016491	oxidoreductase activity; monooxygenase activity; oxidoreductase activity, acting on paired donors, with incorporation or reduction of molecular oxygen; metal ion binding; membrane; heme binding; defense response to Gram-positive bacterium; iron ion binding; integral component of membrane; oxidation-reduction process	protein_coding
WBGene00009230	oac-18	V:16288787-16292154	N2	rnp-6	OK	1.71975	3.03507	0.819531	2.35817	5e-05	0.000725861	yes
WBGene00009469	F36D3.1	V:16499351-16502877	N2	rnp-6	OK	22.6102	15.8892	-0.508926	-2.16132	0.00015	0.00195025	yes			protein_coding
WBGene00009908	F49H6.5	V:17023472-17025529	N2	rnp-6	OK	1.30369	2.25427	0.790058	1.74423	0.0028	0.0222533	yes	GO:0006777; GO:0051539; GO:0051536; GO:0003824; GO:0019008; GO:0046872	molybdopterin synthase complex; catalytic activity; Mo-molybdopterin cofactor biosynthetic process; metal ion binding; iron-sulfur cluster binding; 4 iron, 4 sulfur cluster binding	protein_coding
WBGene00008575	scl-24	V:17486430-17487327	N2	rnp-6	OK	0.40383	1.50399	1.89697	2.27114	0.0016	0.014229	yes			protein_coding
WBGene00012405	ztf-25	V:17601822-17602952	N2	rnp-6	OK	11.4427	16.9621	0.567892	2.08787	0.0004	0.00457121	yes	GO:0003676	nucleic acid binding	protein_coding
WBGene00001397	fat-5	V:17725001-17730381	N2	rnp-6	OK	8.59766	41.4099	2.26796	7.8998	5e-05	0.000725861	yes	GO:0006633; GO:0006631; GO:0006629; GO:0016021; GO:0016020; GO:0016717; GO:0042759; GO:0004768; GO:0007275; GO:0055114; GO:0016491	fatty acid metabolic process; oxidoreductase activity, acting on paired donors, with oxidation of a pair of donors resulting in the reduction of molecular oxygen to two molecules of water; oxidoreductase activity; fatty acid biosynthetic process; long-chain fatty acid biosynthetic process; oxidation-reduction process; lipid metabolic process; membrane; multicellular organism development; stearoyl…	protein_coding
WBGene00013343	prp-6	V:18022478-18042355	N2	rnp-6	OK	47.8024	61.2086	0.35665	1.86285	0.00145	0.013173	yes	GO:0046540; GO:0000244; GO:0005634; GO:0000398; GO:0005515; GO:0071013; GO:0006396	catalytic step 2 spliceosome; RNA processing; protein binding; U4/U6 x U5 tri-snRNP complex; spliceosomal tri-snRNP complex assembly; nucleus; mRNA splicing, via spliceosome	protein_coding
WBGene00045416	Y37H2A.14	V:18143737-18144721	N2	rnp-6	OK	12.9049	19.7594	0.614613	2.03246	0.00025	0.00303907	yes	GO:0016021; GO:0016020	integral component of membrane; membrane	protein_coding
WBGene00008891	clec-42	V:18191442-18194262	N2	rnp-6	OK	0.241213	1.92849	2.99909	4.80491	5e-05	0.000725861	yes	GO:0030246	carbohydrate binding	protein_coding
WBGene00013947	ZK228.4	V:18462803-18465320	N2	rnp-6	OK	2.0935	0.735218	-1.50967	-2.4329	5e-05	0.000725861	yes	; GO:0045087; GO:0008080	; innate immune response; N-acetyltransferase activity	protein_coding
WBGene00013073	hmit-1.1	V:18516788-18524221	N2	rnp-6	OK	40.0574	60.7043	0.599729	3.04977	5e-05	0.000725861	yes	GO:0022891; GO:0005355; GO:0006810; GO:0005351; GO:0016324; GO:0005215; GO:0016021; GO:0016020; GO:0046323; GO:0022857; GO:1904659; GO:0015992; GO:0035428; GO:0055085	transporter activity; glucose transmembrane transporter activity; substrate-specific transmembrane transporter activity; apical plasma membrane; integral component of membrane; glucose transmembrane transport; transmembrane transporter activity; hexose transmembrane transport; membrane; glucose import; proton transport; transmembrane transport; transport; sugar:proton symporter activity	protein_coding
WBGene00013074	hmit-1.2	V:18524759-18529156	N2	rnp-6	OK	6.72484	10.1919	0.599854	2.39042	5e-05	0.000725861	yes	GO:0022891; GO:0005355; GO:0006810; GO:0005351; GO:0016324; GO:0005215; GO:0016021; GO:0016020; GO:0046323; GO:0022857; GO:1904659; GO:0009925; GO:0015992; GO:0035428; GO:0055085	transporter activity; glucose transmembrane transporter activity; basal plasma membrane; substrate-specific transmembrane transporter activity; apical plasma membrane; integral component of membrane; glucose transmembrane transport; transmembrane transporter activity; hexose transmembrane transport; membrane; glucose import; proton transport; transmembrane transport; transport; sugar:proton sympo…	protein_coding
WBGene00013489	col-42	V:18638483-18639588	N2	rnp-6	OK	18.303	27.045	0.563283	2.26548	0.00015	0.00195025	yes	GO:0016021; GO:0016020; GO:0005581; GO:0042302	structural constituent of cuticle; collagen trimer; integral component of membrane; membrane	protein_coding
WBGene00003655	nhr-65	V:18839309-18845401	N2	rnp-6	OK	3.89812	2.42861	-0.682647	-1.83584	0.0023	0.0191136	yes	GO:0043565; GO:0003700; GO:0005634; GO:0006355; GO:0008270; GO:0043401; GO:0003677; GO:0046872; GO:0006351	steroid hormone mediated signaling pathway; regulation of transcription, DNA-templated; DNA binding; zinc ion binding; nucleus; metal ion binding; sequence-specific DNA binding; transcription, DNA-templated; DNA binding transcription factor activity	protein_coding
WBGene00012686	Y39B6A.27	V:19026462-19035251	N2	rnp-6	OK	2.05129	1.23906	-0.727287	-1.64869	0.00595	0.0401087	yes	GO:0016021; GO:0016020	integral component of membrane; membrane	protein_coding
WBGene00012680	Y39B6A.21	V:19047046-19048669	N2	rnp-6	OK	1.10513	0.483187	-1.19356	-1.86205	0.0034	0.0259387	yes
WBGene00045461	C25F9.14	V:19436598-19437217	N2	rnp-6	OK	7.3972	3.27464	-1.17564	-2.46326	5e-05	0.000725861	yes			protein_coding
WBGene00012819	Y43F8B.9	V:19479202-19480465	N2	rnp-6	OK	17.5702	6.87382	-1.35395	-4.00522	5e-05	0.000725861	yes			protein_coding
WBGene00010931	M162.5	V:19761050-19766769	N2	rnp-6	OK	5.00841	2.8599	-0.808389	-2.36446	0.0001	0.00135972	yes	GO:0022857; GO:0016021; GO:0016020; GO:0006820; GO:0055085	anion transport; transmembrane transport; transmembrane transporter activity; integral component of membrane; membrane	protein_coding
WBGene00013826	Y116F11B.10	V:19870505-19873931	N2	rnp-6	OK	0.716533	0.373906	-0.938358	-1.60742	0.00705	0.0457217	yes
WBGene00013763	Y113G7B.14	V:20226834-20228829	N2	rnp-6	OK	3.46403	6.85024	0.983702	3.32885	5e-05	0.000725861	yes
WBGene00010005	cnc-7	V:20394072-20394732	N2	rnp-6	OK	21.586	9.667	-1.15896	-2.36898	0.00035	0.00407043	yes	GO:0016021; GO:0016020	integral component of membrane; membrane	protein_coding
WBGene00012624	fbxa-150	V:20522620-20524513	N2	rnp-6	OK	4.80666	3.09233	-0.636344	-1.72866	0.00335	0.0256524	yes	GO:0045087; GO:0005515	innate immune response; protein binding	protein_coding
WBGene00009172	F26F2.7	V:20580995-20590340	N2	rnp-6	OK	18.8003	24.2579	0.367702	1.72507	0.0029	0.0228734	yes	GO:0016021; GO:0016020	integral component of membrane; membrane	protein_coding
WBGene00012186	mlt-11	V:20667210-20678540	N2	rnp-6	OK	4.65952	2.31939	-1.00644	-2.08178	5e-05	0.000725861	yes	GO:0010951; GO:0004867	serine-type endopeptidase inhibitor activity; negative regulation of endopeptidase activity	protein_coding
WBGene00220109	mlt-11	V:20667210-20678540	N2	rnp-6	OK	4.65952	2.31939	-1.00644	-2.08178	5e-05	0.000725861	yes
WBGene00220110	mlt-11	V:20667210-20678540	N2	rnp-6	OK	4.65952	2.31939	-1.00644	-2.08178	5e-05	0.000725861	yes
WBGene00011394	T03D8.7	V:20816154-20816546	N2	rnp-6	OK	4.54647	1.60183	-1.50503	-1.70603	0.0077	0.0487669	yes			protein_coding
WBGene00009292	F31D4.5	V:20854142-20858576	N2	rnp-6	OK	1.90855	0.828226	-1.20438	-2.5792	5e-05	0.000725861	yes			protein_coding
WBGene00000022	abt-4	V:323776-330727	N2	rnp-6	OK	4.40364	3.338	-0.399712	-1.62717	0.00565	0.0385456	yes	GO:0042626; GO:0006810; GO:0043231; GO:0006869; GO:0005215; GO:0016021; GO:0016020; GO:0000166; GO:0016887; GO:0055085; GO:0005524	transporter activity; ATPase activity; transmembrane transport; lipid transport; ATP binding; ATPase activity, coupled to transmembrane movement of substances; membrane; intracellular membrane-bounded organelle; nucleotide binding; integral component of membrane; transport	protein_coding
WBGene00021451	mltn-8	V:374407-379672	N2	rnp-6	OK	0.571226	0.234011	-1.28748	-2.0149	0.0018	0.0156835	yes	GO:0016021; GO:0016020	integral component of membrane; membrane	protein_coding
WBGene00022645	ZK6.11	V:415712-417706	N2	rnp-6	OK	41.1258	81.6826	0.989983	4.68795	5e-05	0.000725861	yes	; GO:0045087; GO:0045121	; innate immune response; membrane raft	protein_coding
WBGene00020016	lipl-3	V:521675-524218	N2	rnp-6	OK	0.780401	1.58081	1.01838	1.98925	0.00125	0.0117015	yes	GO:0005764; GO:0016787; GO:0006629; GO:0016788; GO:0016042	hydrolase activity; lysosome; lipid catabolic process; lipid metabolic process; hydrolase activity, acting on ester bonds	protein_coding
WBGene00001564	icl-1	V:724206-728103	N2	rnp-6	OK	518.621	862.301	0.733513	3.71936	5e-05	0.000725861	yes	GO:0016829; GO:0006099; GO:0005739; GO:0004474; GO:0004451; GO:0003824; GO:0016740; GO:0019752; GO:0008152; GO:0008340; GO:0006097	malate synthase activity; carboxylic acid metabolic process; lyase activity; transferase activity; glyoxylate cycle; metabolic process; determination of adult lifespan; catalytic activity; mitochondrion; tricarboxylic acid cycle; isocitrate lyase activity	protein_coding
WBGene00001480	fmo-5	V:899311-903579	N2	rnp-6	OK	22.8164	39.1382	0.778505	3.48881	5e-05	0.000725861	yes	GO:0004497; GO:0050660; GO:0004499; GO:0050661; GO:0055114; GO:0016491	N,N-dimethylaniline monooxygenase activity; flavin adenine dinucleotide binding; monooxygenase activity; NADP binding; oxidation-reduction process; oxidoreductase activity	protein_coding
WBGene00021072	W07B8.4	V:1130087-1131930	N2	rnp-6	OK	1.85507	4.25497	1.19768	2.56809	5e-05	0.000725861	yes	GO:0016787; GO:0005615; GO:0051603; GO:0005764; GO:0004197; GO:0006508; GO:0008233; GO:0008234	extracellular space; lysosome; hydrolase activity; peptidase activity; cysteine-type endopeptidase activity; proteolysis involved in cellular protein catabolic process; proteolysis; cysteine-type peptidase activity	protein_coding
WBGene00001578	ges-1	V:1427649-1432137	N2	rnp-6	OK	21.0495	13.0459	-0.690195	-2.94289	5e-05	0.000725861	yes	GO:0016787; GO:0005788; GO:0005777; GO:0005783; GO:0052689	hydrolase activity; carboxylic ester hydrolase activity; endoplasmic reticulum lumen; endoplasmic reticulum; peroxisome	protein_coding
WBGene00019977	fpn-1.2	V:1462012-1464699	N2	rnp-6	OK	0.258458	0.823642	1.67209	2.51166	0.00035	0.00407043	yes	GO:0016021; GO:0016020; GO:0034755; GO:0005381	iron ion transmembrane transporter activity; integral component of membrane; iron ion transmembrane transport; membrane	protein_coding
WBGene00018707	oac-31	V:1538352-1541824	N2	rnp-6	OK	4.768	6.44565	0.43494	1.59246	0.00585	0.0395707	yes	GO:0016021; GO:0016020; GO:0016746; GO:0016740; GO:0016747	transferase activity; transferase activity, transferring acyl groups other than amino-acyl groups; transferase activity, transferring acyl groups; integral component of membrane; membrane	protein_coding
WBGene00021611	nhr-238	V:1628105-1629442	N2	rnp-6	OK	1.7361	2.82411	0.701946	1.55486	0.0063	0.0419085	yes	GO:0043565; GO:0003700; GO:0005634; GO:0006355; GO:0008270; GO:0043401; GO:0003677; GO:0046872; GO:0006351	steroid hormone mediated signaling pathway; regulation of transcription, DNA-templated; DNA binding; zinc ion binding; nucleus; metal ion binding; sequence-specific DNA binding; transcription, DNA-templated; DNA binding transcription factor activity	protein_coding
WBGene00018112	F36H9.4	V:1778324-1779202	N2	rnp-6	OK	16.7693	8.8833	-0.916657	-2.16877	0.00025	0.00303907	yes			protein_coding
WBGene00002016	hsp-16.2	V:1804333-1804971	N2	rnp-6	OK	14.5009	3.12995	-2.21192	-5.13671	5e-05	0.000725861	yes	GO:0005737; GO:0009408; GO:0051082;	; cytoplasm; response to heat; unfolded protein binding	protein_coding
WBGene00021601	Y46H3A.5	V:1811345-1814116	N2	rnp-6	OK	0.968441	0.459972	-1.07412	-1.56569	0.00735	0.0471344	yes	GO:0016787; GO:0006629	hydrolase activity; lipid metabolic process	protein_coding
WBGene00000111	alh-5	V:1996108-1999581	N2	rnp-6	OK	11.7933	6.65387	-0.825707	-2.91356	5e-05	0.000725861	yes	GO:0006081; GO:0004030; GO:0055114; GO:0008152; GO:0016491	metabolic process; aldehyde dehydrogenase [NAD(P)+] activity; cellular aldehyde metabolic process; oxidation-reduction process; oxidoreductase activity	protein_coding
WBGene00021491	comt-4	V:2049222-2050172	N2	rnp-6	OK	58.1001	5.30604	-3.45283	-10.5704	5e-05	0.000725861	yes	GO:0008168; GO:0016740; GO:0032259; GO:0008171	transferase activity; methyltransferase activity; O-methyltransferase activity; methylation	protein_coding
WBGene00268197	Y40B10A.11	V:2050914-2051607	N2	rnp-6	OK	1.05936	0	-inf		0.00105	0.0101691	yes			protein_coding
WBGene00017723	F22F7.6	V:2115489-2118644	N2	rnp-6	OK	0.0423715	0.679801	4.00395	2.26525	0.0034	0.0259387	yes	GO:0016740	transferase activity	protein_coding
WBGene00194908	F22F7.8	V:2120946-2121703	N2	rnp-6	OK	27.9361	49.2278	0.817341	2.69497	5e-05	0.000725861	yes			protein_coding
WBGene00021167	cyp-32B1	V:2198054-2201415	N2	rnp-6	OK	12.9163	4.24726	-1.60459	-5.50087	5e-05	0.000725861	yes	GO:0004497; GO:0020037; GO:0016705; GO:0005506; GO:0046872; GO:0055114; GO:0016491	oxidoreductase activity; iron ion binding; oxidoreductase activity, acting on paired donors, with incorporation or reduction of molecular oxygen; metal ion binding; heme binding; monooxygenase activity; oxidation-reduction process	protein_coding
WBGene00021235	Y19D10B.6	V:2318524-2321052	N2	rnp-6	OK	0.841932	1.54972	0.880236	1.89408	0.00165	0.0145952	yes	GO:0006508; GO:0008237	metallopeptidase activity; proteolysis	protein_coding
WBGene00021236	pud-1.2	V:2322037-2322566	N2	rnp-6	OK	8.48623	0	-inf		5e-05	0.000725861	yes			protein_coding
WBGene00016052	dod-3	V:2730509-2731097	N2	rnp-6	OK	2.45508	1.05052	-1.22466	-1.72017	0.00695	0.0452297	yes	GO:0016021; GO:0016020; GO:0007165	signal transduction; integral component of membrane; membrane	protein_coding
WBGene00000977	dhs-14	V:2763963-2765225	N2	rnp-6	OK	10.9339	15.1877	0.474096	1.65907	0.00375	0.0280629	yes	GO:0055114; GO:0016491	oxidation-reduction process; oxidoreductase activity	protein_coding
WBGene00004130	ketn-1	V:2781482-2807860	N2	rnp-6	OK	5.80379	16.9032	1.54223	7.8817	5e-05	0.000725861	yes	GO:0051015; GO:0005515; GO:0031674	actin filament binding; protein binding; I band	protein_coding
WBGene00018138	folt-2	V:2872464-2875600	N2	rnp-6	OK	2.97519	5.52186	0.892174	2.74864	5e-05	0.000725861	yes	GO:0006810; GO:0016021; GO:0016020; GO:0022857; GO:0055085; GO:0005542	integral component of membrane; transmembrane transporter activity; membrane; folic acid binding; transmembrane transport; transport	protein_coding
WBGene00016860	cyp-33C9	V:3091814-3094501	N2	rnp-6	OK	5.14493	3.41396	-0.591706	-1.80696	0.00235	0.0194563	yes	GO:0004497; GO:0008395; GO:0020037; GO:0016705; GO:0005506; GO:0046872; GO:0055114; GO:0016491	oxidoreductase activity; iron ion binding; oxidoreductase activity, acting on paired donors, with incorporation or reduction of molecular oxygen; steroid hydroxylase activity; metal ion binding; heme binding; monooxygenase activity; oxidation-reduction process	protein_coding
WBGene00022265	Y73C8C.8	V:3110182-3113886	N2	rnp-6	OK	3.77073	5.06131	0.424667	1.5651	0.00675	0.0441976	yes	GO:0043161; GO:0005829; GO:0042787; GO:0008270; GO:0005515; GO:0061630; GO:0000209	ubiquitin protein ligase activity; cytosol; protein binding; zinc ion binding; protein ubiquitination involved in ubiquitin-dependent protein catabolic process; proteasome-mediated ubiquitin-dependent protein catabolic process; protein polyubiquitination	protein_coding
WBGene00022260	Y73C8B.3	V:3191301-3193233	N2	rnp-6	OK	16.1384	9.60488	-0.748661	-2.77473	5e-05	0.000725861	yes	GO:0016787	hydrolase activity	protein_coding
WBGene00019101	F59B1.10	V:3644744-3647954	N2	rnp-6	OK	0.376119	0.917843	1.28706	1.98037	0.0012	0.0113201	yes			protein_coding
WBGene00015044	cyp-34A9	V:3968132-3970514	N2	rnp-6	OK	59.2914	43.4416	-0.448745	-1.93469	0.0009	0.00897191	yes	GO:0004497; GO:0008395; GO:0020037; GO:0016705; GO:0005506; GO:0046872; GO:0055114; GO:0016491	oxidoreductase activity; iron ion binding; oxidoreductase activity, acting on paired donors, with incorporation or reduction of molecular oxygen; steroid hydroxylase activity; metal ion binding; heme binding; monooxygenase activity; oxidation-reduction process	protein_coding
WBGene00015045	cyp-34A10	V:3970711-3973001	N2	rnp-6	OK	1.27327	0.681255	-0.902277	-1.76698	0.0036	0.0271525	yes	GO:0004497; GO:0008395; GO:0020037; GO:0016705; GO:0005506; GO:0046872; GO:0055114; GO:0016491	oxidoreductase activity; iron ion binding; oxidoreductase activity, acting on paired donors, with incorporation or reduction of molecular oxygen; steroid hydroxylase activity; metal ion binding; heme binding; monooxygenase activity; oxidation-reduction process	protein_coding
WBGene00015046	nlp-34	V:3978828-3979134	N2	rnp-6	OK	29.7644	11.7407	-1.34207	-2.79651	5e-05	0.000725861	yes	GO:0007218	neuropeptide signaling pathway	protein_coding
WBGene00022523	ZC132.4	V:4301292-4304394	N2	rnp-6	OK	1.09825	0.670211	-0.712522	-1.61997	0.00705	0.0457217	yes
WBGene00235310	R02D1.2	V:4320459-4322076	N2	rnp-6	OK	0.694885	1.78763	1.3632	2.31391	0.00055	0.00597832	yes	GO:0003824; GO:0009058	catalytic activity; biosynthetic process	protein_coding
WBGene00021627	Y47D7A.15	V:4431685-4433187	N2	rnp-6	OK	0.139392	0.838772	2.58914	2.95454	0.0009	0.00897191	yes			protein_coding
WBGene00021625	Y47D7A.13	V:4434881-4435927	N2	rnp-6	OK	0.335285	1.35196	2.01159	2.76222	0.00025	0.00303907	yes			protein_coding
WBGene00000712	col-139	V:4652381-4653986	N2	rnp-6	OK	61.8956	104.73	0.75877	3.63798	5e-05	0.000725861	yes	GO:0016021; GO:0016020; GO:0005581; GO:0042302	structural constituent of cuticle; collagen trimer; integral component of membrane; membrane	protein_coding
WBGene00003528	nas-9	V:4836027-4840010	N2	rnp-6	OK	11.2549	5.71708	-0.977206	-3.55063	5e-05	0.000725861	yes	; GO:0016787; GO:0004222; GO:0005576; GO:0008270; GO:0006508; GO:0008233; GO:0046872; GO:0008237	; peptidase activity; extracellular region; metalloendopeptidase activity; zinc ion binding; hydrolase activity; metal ion binding; metallopeptidase activity; proteolysis	protein_coding
WBGene00016511	C37H5.13	V:4855324-4862965	N2	rnp-6	OK	19.3528	30.794	0.67011	2.98772	5e-05	0.000725861	yes	GO:0005782; GO:0006637; GO:0047617; GO:0009062	acyl-CoA metabolic process; acyl-CoA hydrolase activity; peroxisomal matrix; fatty acid catabolic process	protein_coding
WBGene00003573	ncx-8	V:4983748-4987197	N2	rnp-6	OK	0.515272	0.913117	0.825466	1.7014	0.00395	0.0292687	yes	GO:0016021; GO:0016020; GO:0055085	transmembrane transport; integral component of membrane; membrane	protein_coding
WBGene00003574	ncx-9	V:4991504-4995064	N2	rnp-6	OK	0.251928	1.02806	2.02884	3.33469	5e-05	0.000725861	yes	GO:0086036; GO:0086038; GO:0016021; GO:0016020; GO:0005739; GO:1905815; GO:0099093; GO:0055085	regulation of dorsal/ventral axon guidance; regulation of cardiac muscle cell membrane potential; mitochondrial calcium release; integral component of membrane; membrane; mitochondrion; calcium:sodium antiporter activity involved in regulation of cardiac muscle cell membrane potential; transmembrane transport	protein_coding
WBGene00021977	Y58A7A.3	V:5077848-5080896	N2	rnp-6	OK	18.5934	13.7761	-0.432629	-1.99112	0.0007	0.00728567	yes			protein_coding
WBGene00016862	C52A10.1	V:5230476-5233888	N2	rnp-6	OK	12.1687	16.3996	0.430484	1.78712	0.00225	0.0187814	yes	GO:0016787; GO:0052689	hydrolase activity; carboxylic ester hydrolase activity	protein_coding
WBGene00000373	cyp-14A5	V:5421011-5423305	N2	rnp-6	OK	5.5997	8.05072	0.523768	1.84427	0.00155	0.013881	yes	GO:0004497; GO:0020037; GO:0016705; GO:0005506; GO:0046872; GO:0055114; GO:0016491	oxidoreductase activity; iron ion binding; oxidoreductase activity, acting on paired donors, with incorporation or reduction of molecular oxygen; metal ion binding; heme binding; monooxygenase activity; oxidation-reduction process	protein_coding
WBGene00016061	hpo-15	V:5505295-5513830	N2	rnp-6	OK	120.639	75.4985	-0.676182	-3.30157	5e-05	0.000725861	yes	GO:0055114; GO:0016491	oxidation-reduction process; oxidoreductase activity	protein_coding
WBGene00019757	memb-2	V:5617653-5620140	N2	rnp-6	OK	63.4399	49.2593	-0.364993	-1.66397	0.0033	0.025334	yes	GO:0006888; GO:0005794; GO:0006891; GO:0006810; GO:0000149; GO:0006896; GO:0016021; GO:0016020; GO:0031902; GO:0031201; GO:0005789; GO:0048280; GO:0042147; GO:0012507; GO:0015031; GO:0005484; GO:0006623; GO:0005829	endoplasmic reticulum membrane; ER to Golgi vesicle-mediated transport; SNARE complex; vesicle fusion with Golgi apparatus; Golgi apparatus; cytosol; SNAP receptor activity; membrane; intra-Golgi vesicle-mediated transport; retrograde transport, endosome to Golgi; late endosome membrane; SNARE binding; Golgi to vacuole transport; protein transport; protein targeting to vacuole; integral component…	protein_coding
WBGene00016892	C53A3.2	V:5762333-5763846	N2	rnp-6	OK	24.8282	35.2141	0.504171	2.28217	5e-05	0.000725861	yes	GO:0016311; GO:0005829; GO:0016791; GO:0008152	metabolic process; cytosol; phosphatase activity; dephosphorylation	protein_coding
WBGene00018427	F44E7.5	V:5778817-5781015	N2	rnp-6	OK	20.5573	30.9641	0.59094	2.60451	5e-05	0.000725861	yes			protein_coding
WBGene00000713	col-140	V:5835852-5836841	N2	rnp-6	OK	1236.55	1558.63	0.333962	1.77056	0.00205	0.0174119	yes	GO:0005581; GO:0042302	structural constituent of cuticle; collagen trimer	protein_coding
WBGene00019808	R01B10.6	V:6051375-6053238	N2	rnp-6	OK	57.3272	43.9607	-0.383006	-1.76193	0.00205	0.0174119	yes	GO:0016021; GO:0016020; GO:0019915	integral component of membrane; lipid storage; membrane	protein_coding
WBGene00023432	K12B6.9	V:6291450-6292555	N2	rnp-6	OK	11.6352	5.69879	-1.02977	-2.74305	5e-05	0.000725861	yes			protein_coding
WBGene00001581	gfi-1	V:6392535-6399921	N2	rnp-6	OK	59.7189	119.111	0.996048	5.27277	5e-05	0.000725861	yes	GO:0045121; GO:0006338	membrane raft; chromatin remodeling	protein_coding
WBGene00001089	dre-1	V:6533614-6546491	N2	rnp-6	OK	10.4987	8.21559	-0.353771	-1.54766	0.0067	0.0439419	yes	GO:0005737; GO:0008078; GO:0018996; GO:0005634; GO:0002119; GO:0008406; GO:0000151; GO:0043065; GO:0016567; GO:0009792; GO:0008270; GO:0005515; GO:0046872; GO:0007275; GO:0006915; GO:0040034	regulation of development, heterochronic; nematode larval development; embryo development ending in birth or egg hatching; cytoplasm; mesodermal cell migration; apoptotic process; zinc ion binding; nucleus; metal ion binding; gonad development; protein binding; protein ubiquitination; multicellular organism development; molting cycle, collagen and cuticulin-based cuticle; positive regulation of a…	protein_coding
WBGene00001506	fut-2	V:6573982-6575797	N2	rnp-6	OK	0.837723	0.288311	-1.53885	-1.83112	0.0074	0.0473757	yes	GO:0036065; GO:0005794; GO:0005975; GO:0006486; GO:0016021; GO:0016020; GO:0008107; GO:0016740; GO:0043413; GO:0016757; GO:0032580	transferase activity, transferring glycosyl groups; galactoside 2-alpha-L-fucosyltransferase activity; protein glycosylation; Golgi apparatus; Golgi cisterna membrane; macromolecule glycosylation; transferase activity; carbohydrate metabolic process; membrane; fucosylation; integral component of membrane	protein_coding
WBGene00017151	EGAP9.3	V:6578184-6580119	N2	rnp-6	OK	1.09816	0.517254	-1.08614	-1.72324	0.00545	0.0375212	yes	GO:0036065; GO:0008107; GO:0005975; GO:0016021; GO:0016020; GO:0043413; GO:0016757	transferase activity, transferring glycosyl groups; galactoside 2-alpha-L-fucosyltransferase activity; macromolecule glycosylation; carbohydrate metabolic process; membrane; fucosylation; integral component of membrane	protein_coding
WBGene00004062	pmp-5	V:6662190-6665813	N2	rnp-6	OK	3.49409	5.44108	0.638976	2.00084	0.0004	0.00457121	yes	GO:0042626; GO:0006810; GO:0016021; GO:0016020; GO:0000166; GO:0016887; GO:0055085; GO:0005524	ATPase activity; integral component of membrane; ATP binding; ATPase activity, coupled to transmembrane movement of substances; membrane; nucleotide binding; transmembrane transport; transport	protein_coding
WBGene00001210	egl-46	V:6679328-6681573	N2	rnp-6	OK	4.54669	1.96548	-1.20993	-3.05308	5e-05	0.000725861	yes	GO:0001085; GO:0045165; GO:0030182; GO:0055057; GO:0005634; GO:0031536; GO:0006357; GO:0001764; GO:0003676; GO:0007411; GO:0000981	nucleic acid binding; RNA polymerase II transcription factor activity, sequence-specific DNA binding; neuron differentiation; neuron migration; positive regulation of exit from mitosis; axon guidance; neuroblast division; RNA polymerase II transcription factor binding; nucleus; regulation of transcription from RNA polymerase II promoter; cell fate commitment	protein_coding
WBGene00003473	mtl-1	V:6691368-6691863	N2	rnp-6	OK	347.13	219.046	-0.664242	-3.17138	5e-05	0.000725861	yes	GO:0005737; GO:0046872; GO:0010288; GO:0008270; GO:0046689; GO:0046870; GO:0005507	response to mercury ion; cytoplasm; cadmium ion binding; zinc ion binding; copper ion binding; metal ion binding; response to lead ion	protein_coding
WBGene00020808	clik-1	V:6765559-6768788	N2	rnp-6	OK	169.995	241.306	0.505374	2.6994	5e-05	0.000725861	yes			protein_coding
WBGene00006801	unc-68	V:6901686-6929038	N2	rnp-6	OK	3.85419	5.05332	0.390804	1.92406	0.0007	0.00728567	yes	GO:0040011; GO:0005219; GO:0005262; GO:0070588; GO:0006811; GO:0016020; GO:0005216; GO:0006816; GO:0055085; GO:0031674; GO:0016529; GO:0005509; GO:0005515; GO:0006874; GO:0033365; GO:0043068; GO:0005886; GO:0051209; GO:0016021	calcium ion binding; I band; calcium channel activity; protein binding; calcium ion transport; protein localization to organelle; ion channel activity; integral component of membrane; ion transport; calcium ion transmembrane transport; sarcoplasmic reticulum; positive regulation of programmed cell death; membrane; ryanodine-sensitive calcium-release channel activity; locomotion; release of seques…	protein_coding
WBGene00005188	srg-31	V:6950834-6953897	N2	rnp-6	OK	0.17419	0.728805	2.06487	2.56434	0.0006	0.00643061	yes	GO:0007606; GO:0004888; GO:0016021; GO:0016020; GO:0007165	sensory perception of chemical stimulus; transmembrane signaling receptor activity; signal transduction; integral component of membrane; membrane	protein_coding
WBGene00001399	fat-7	V:7151355-7153146	N2	rnp-6	OK	21.9049	129.366	2.56214	11.2202	5e-05	0.000725861	yes	GO:0006633; GO:0006631; GO:0006629; GO:0016021; GO:0016020; GO:0016717; GO:0005789; GO:0004768; GO:0007275; GO:0055114; GO:0016491	endoplasmic reticulum membrane; fatty acid metabolic process; oxidoreductase activity, acting on paired donors, with oxidation of a pair of donors resulting in the reduction of molecular oxygen to two molecules of water; oxidoreductase activity; fatty acid biosynthetic process; stearoyl-CoA 9-desaturase activity; oxidation-reduction process; lipid metabolic process; membrane; multicellular organi…	protein_coding
WBGene00017335	F10D2.10	V:7154509-7156224	N2	rnp-6	OK	9.95509	38.4942	1.95113	7.73017	5e-05	0.000725861	yes	GO:0016787	hydrolase activity	protein_coding
WBGene00015400	cyp-35A2	V:7362315-7364204	N2	rnp-6	OK	42.0189	31.0437	-0.436737	-2.06414	0.00035	0.00407043	yes	GO:0004497; GO:0008395; GO:0020037; GO:0016705; GO:0009410; GO:0005506; GO:0046872; GO:0055114; GO:0016491	response to xenobiotic stimulus; oxidoreductase activity; iron ion binding; oxidoreductase activity, acting on paired donors, with incorporation or reduction of molecular oxygen; steroid hydroxylase activity; metal ion binding; heme binding; monooxygenase activity; oxidation-reduction process	protein_coding
WBGene00003731	nhx-3	V:7539314-7544838	N2	rnp-6	OK	2.11768	1.2576	-0.751808	-1.94176	0.00065	0.0068644	yes	GO:0015386; GO:0015297; GO:0006810; GO:0098719; GO:0071805; GO:1902600; GO:0006812; GO:0016021; GO:0016020; GO:0015299; GO:0006814; GO:0051453; GO:0012505; GO:0005886; GO:0006811; GO:0006885; GO:0015385; GO:0055085	hydrogen ion transmembrane transport; cation transport; sodium ion import across plasma membrane; antiporter activity; solute:proton antiporter activity; potassium:proton antiporter activity; potassium ion transmembrane transport; integral component of membrane; ion transport; sodium:proton antiporter activity; sodium ion transport; plasma membrane; membrane; regulation of pH; endomembrane system…	protein_coding
WBGene00001500	ftn-1	V:7545973-7548012	N2	rnp-6	OK	1.34725	10.7435	2.99537	5.9017	5e-05	0.000725861	yes	GO:0005737; GO:0006879; GO:0004322; GO:0006880; GO:0008199; GO:0006826; GO:0042802; GO:0005515; GO:0005506; GO:0046872; GO:0055114; GO:0016491	ferroxidase activity; cytoplasm; identical protein binding; oxidoreductase activity; cellular iron ion homeostasis; iron ion binding; intracellular sequestering of iron ion; metal ion binding; protein binding; iron ion transport; ferric iron binding; oxidation-reduction process	protein_coding
WBGene00016824	C50E3.13	V:7622334-7624214	N2	rnp-6	OK	13.5256	18.1849	0.427046	1.7414	0.00315	0.0244316	yes			protein_coding
WBGene00015709	cyp-33A1	V:7679320-7681537	N2	rnp-6	OK	13.3652	17.5874	0.396061	1.66118	0.00465	0.03317	yes	GO:0004497; GO:0008395; GO:0020037; GO:0016705; GO:0005506; GO:0046872; GO:0055114; GO:0016491	oxidoreductase activity; iron ion binding; oxidoreductase activity, acting on paired donors, with incorporation or reduction of molecular oxygen; steroid hydroxylase activity; metal ion binding; heme binding; monooxygenase activity; oxidation-reduction process	protein_coding
WBGene00004395	rol-3	V:8228276-8238351	N2	rnp-6	OK	1.44057	0.848671	-0.763359	-2.55292	5e-05	0.000725861	yes	GO:0042127; GO:0040011; GO:0006468; GO:0030154; GO:0045087; GO:0038083; GO:0016021; GO:0016020; GO:0071944; GO:0031252; GO:0000166; GO:0004715; GO:0005515; GO:0004672; GO:0009792; GO:0007169; GO:0005102; GO:0016477; GO:0031234; GO:0005524	innate immune response; peptidyl-tyrosine autophosphorylation; cell periphery; embryo development ending in birth or egg hatching; cell migration; protein phosphorylation; protein binding; extrinsic component of cytoplasmic side of plasma membrane; non-membrane spanning protein tyrosine kinase activity; cell leading edge; transmembrane receptor protein tyrosine kinase signaling pathway; cell diff…	protein_coding
WBGene00017681	slc-17.5	V:8282374-8284885	N2	rnp-6	OK	2.10196	3.14398	0.58086	1.66015	0.00345	0.0262347	yes	GO:0022857; GO:0016021; GO:0016020; GO:0006820; GO:0055085	anion transport; transmembrane transport; transmembrane transporter activity; integral component of membrane; membrane	protein_coding
WBGene00001882	his-8	V:8532714-8533170	N2	rnp-6	OK	73.9244	55.3279	-0.418044	-1.55097	0.00715	0.0462067	yes	GO:0000786; GO:0005634; GO:0005811; GO:0035267; GO:0003677; GO:0046982; GO:0005694; GO:0006334	nucleosome; DNA binding; lipid droplet; NuA4 histone acetyltransferase complex; protein heterodimerization activity; nucleosome assembly; nucleus; chromosome	protein_coding
WBGene00044554	F41E6.15	V:8602083-8602825	N2	rnp-6	OK	16.5303	8.98234	-0.879945	-2.25207	0.0001	0.00135972	yes			protein_coding
WBGene00018293	F41E6.12	V:8626901-8629106	N2	rnp-6	OK	1.45654	2.89988	0.993443	2.17253	0.00055	0.00597832	yes			protein_coding
WBGene00017881	asp-13	V:8641490-8643225	N2	rnp-6	OK	67.7353	53.2433	-0.347308	-1.70128	0.00405	0.0298522	yes	GO:0016787; GO:0008233; GO:0004190; GO:0030163; GO:0006508	hydrolase activity; peptidase activity; proteolysis; aspartic-type endopeptidase activity; protein catabolic process	protein_coding
WBGene00015225	B0507.8	V:8760686-8763194	N2	rnp-6	OK	0.201242	0.683588	1.7642	2.09972	0.0031	0.0241392	yes			protein_coding
WBGene00001924	his-50	V:8847392-8847704	N2	rnp-6	OK	528.896	309.551	-0.772809	-3.36189	5e-05	0.000725861	yes	GO:0042393; GO:0005634; GO:0003677; GO:0000786; GO:0000788; GO:0046982; GO:0005694; GO:0006334	nucleosome; histone binding; DNA binding; protein heterodimerization activity; nucleosome assembly; nuclear nucleosome; nucleus; chromosome	protein_coding
WBGene00001925	his-51	V:8849787-8850171	N2	rnp-6	OK	167.649	36.1957	-2.21155	-8.96382	5e-05	0.000725861	yes	GO:0006281; GO:0006342; GO:0005634; GO:0000786; GO:0006355; GO:0000790; GO:0003677; GO:0046982; GO:0005694	nuclear chromatin; nucleosome; regulation of transcription, DNA-templated; DNA binding; chromatin silencing; protein heterodimerization activity; nucleus; DNA repair; chromosome	protein_coding
WBGene00001895	his-21	V:8891882-8892266	N2	rnp-6	OK	4.46859	9.60703	1.10427	2.17822	0.00035	0.00407043	yes	GO:0006281; GO:0006342; GO:0005634; GO:0000786; GO:0006355; GO:0000790; GO:0003677; GO:0046982; GO:0005694	nuclear chromatin; nucleosome; regulation of transcription, DNA-templated; DNA binding; chromatin silencing; protein heterodimerization activity; nucleus; DNA repair; chromosome	protein_coding
WBGene00001891	his-17	V:8897524-8897992	N2	rnp-6	OK	315.819	450.906	0.51373	2.5942	5e-05	0.000725861	yes	GO:0005634; GO:0003677; GO:0031492; GO:0000786; GO:0046982; GO:0005694; GO:0006334	nucleosome; DNA binding; protein heterodimerization activity; nucleosome assembly; nucleus; nucleosomal DNA binding; chromosome	protein_coding
WBGene00016097	C25E10.8	V:9053316-9054017	N2	rnp-6	OK	13.0512	8.73188	-0.579822	-1.59614	0.0061	0.040891	yes			protein_coding
WBGene00023417	swm-1	V:9054222-9054877	N2	rnp-6	OK	15.4436	8.90215	-0.794784	-2.14622	0.0003	0.00356315	yes			protein_coding
WBGene00006418	tag-38	V:9144614-9146899	N2	rnp-6	OK	5.42948	9.40148	0.792073	2.89139	5e-05	0.000725861	yes	GO:0016829; GO:0016831; GO:0019752; GO:0003824; GO:0050830; GO:0030170	carboxy-lyase activity; pyridoxal phosphate binding; carboxylic acid metabolic process; lyase activity; catalytic activity; defense response to Gram-positive bacterium	protein_coding
WBGene00019466	tos-1	V:9343276-9344218	N2	rnp-6	OK	142.125	270.35	0.927665	4.45212	5e-05	0.000725861	yes			protein_coding
WBGene00017091	ttr-40	V:9354520-9355471	N2	rnp-6	OK	3.35324	1.14685	-1.54787	-2.21104	0.00175	0.015327	yes	GO:0005615	extracellular space	protein_coding
WBGene00010597	K06A4.7	V:9489933-9491492	N2	rnp-6	OK	810.985	603.271	-0.426869	-2.08611	0.0002	0.00250605	yes			protein_coding
WBGene00000720	col-147	V:9632270-9633337	N2	rnp-6	OK	0.869364	2.41236	1.47241	2.63652	5e-05	0.000725861	yes	GO:0016021; GO:0016020; GO:0005581; GO:0042302	structural constituent of cuticle; collagen trimer; integral component of membrane; membrane	protein_coding
WBGene00007141	pitr-4	V:9658930-9661614	N2	rnp-6	OK	0.252604	0.584111	1.20937	1.73028	0.00545	0.0375212	yes	GO:0006810; GO:0006817; GO:0016021; GO:0016020; GO:0005315; GO:0035725; GO:0005887; GO:0015319; GO:0035435; GO:0055085	inorganic phosphate transmembrane transporter activity; integral component of membrane; integral component of plasma membrane; phosphate ion transmembrane transport; sodium ion transmembrane transport; phosphate ion transport; sodium:inorganic phosphate symporter activity; membrane; transmembrane transport; transport	protein_coding
WBGene00011573	anmt-3	V:9952698-9958331	N2	rnp-6	OK	30.3938	19.3721	-0.649797	-2.71454	5e-05	0.000725861	yes	GO:0008168; GO:0016740; GO:0032259	transferase activity; methyltransferase activity; methylation	protein_coding
WBGene00011006	ugt-47	V:10094719-10098594	N2	rnp-6	OK	11.3505	15.0682	0.40876	1.65898	0.004	0.0295586	yes	GO:0008152; GO:0016021; GO:0016020; GO:0016740; GO:0016757; GO:0016758; GO:0015020; GO:0043231	transferase activity, transferring glycosyl groups; transferase activity; membrane; transferase activity, transferring hexosyl groups; metabolic process; glucuronosyltransferase activity; intracellular membrane-bounded organelle; integral component of membrane	protein_coding
WBGene00014106	ZK856.5	V:10186006-10190131	N2	rnp-6	OK	4.26155	1.93623	-1.13813	-3.08828	5e-05	0.000725861	yes	GO:0016787	hydrolase activity	protein_coding
WBGene00044174	fipr-5	V:10221036-10221417	N2	rnp-6	OK	14.8156	8.65431	-0.775629	-1.7148	0.0048	0.0339756	yes			protein_coding
WBGene00007537	fipr-8	V:10239645-10240185	N2	rnp-6	OK	0	0.548598	inf		0.00275	0.0219448	yes			protein_coding
WBGene00003091	lys-2	V:10280309-10281470	N2	rnp-6	OK	29.8413	13.843	-1.10816	-4.20615	5e-05	0.000725861	yes	GO:0045087; GO:0002376; GO:0003796; GO:0050830; GO:0009253; GO:0050829	innate immune response; peptidoglycan catabolic process; lysozyme activity; immune system process; defense response to Gram-positive bacterium; defense response to Gram-negative bacterium	protein_coding
WBGene00000601	col-12	V:10423906-10425092	N2	rnp-6	OK	0.57786	1.29865	1.16822	1.8028	0.0025	0.0203879	yes	GO:0005581; GO:0042302	structural constituent of cuticle; collagen trimer	protein_coding
WBGene00012531	Y32F6B.1	V:10478589-10484740	N2	rnp-6	OK	11.5715	15.4403	0.416127	1.7739	0.0021	0.0177668	yes	GO:0006810; GO:0005215; GO:0016021; GO:0016020; GO:0015347; GO:0005887; GO:0005886; GO:0043252; GO:0006811	transporter activity; integral component of plasma membrane; sodium-independent organic anion transport; ion transport; plasma membrane; membrane; integral component of membrane; transport; sodium-independent organic anion transmembrane transporter activity	protein_coding
WBGene00007947	C35A5.3	V:10497058-10501397	N2	rnp-6	OK	8.63949	5.62253	-0.619726	-2.12736	0.00035	0.00407043	yes	GO:0022857; GO:0016021; GO:0016020; GO:0006820; GO:0055085	anion transport; transmembrane transport; transmembrane transporter activity; integral component of membrane; membrane	protein_coding
WBGene00011895	T21C9.9	V:10590550-10592579	N2	rnp-6	OK	0.171729	0.513489	1.5802	1.84743	0.0066	0.0434415	yes			protein_coding
WBGene00009237	F28H7.3	V:10749369-10750786	N2	rnp-6	OK	9.75799	13.5909	0.477988	1.79021	0.0017	0.0149637	yes	GO:0016787; GO:0006629	hydrolase activity; lipid metabolic process	protein_coding
WBGene00008370	D1054.1	V:10764365-10770008	N2	rnp-6	OK	22.6837	11.969	-0.92235	-3.36899	5e-05	0.000725861	yes	GO:0005737; GO:0016787; GO:0005811; GO:0004806; GO:0006629; GO:0016020; GO:0016042; GO:0055088; GO:0019433; GO:0008152; GO:0042572; GO:0050253	lipid homeostasis; triglyceride lipase activity; retinyl-palmitate esterase activity; hydrolase activity; cytoplasm; lipid droplet; retinol metabolic process; metabolic process; triglyceride catabolic process; lipid metabolic process; membrane; lipid catabolic process	protein_coding
WBGene00077783	D1054.18	V:10800773-10801291	N2	rnp-6	OK	14.2556	6.69684	-1.08997	-1.6051	0.0015	0.0135324	yes			protein_coding
WBGene00219866	D1054.18	V:10800773-10801291	N2	rnp-6	OK	14.2556	6.69684	-1.08997	-1.6051	0.0015	0.0135324	yes
WBGene00043302	F32D8.11,F32D8.12	V:10887872-10891030	N2	rnp-6	OK	30.2133	44.2105	0.549205	2.48217	5e-05	0.000725861	yes			protein_coding
WBGene00009334	F32D8.11,F32D8.12	V:10887872-10891030	N2	rnp-6	OK	30.2133	44.2105	0.549205	2.48217	5e-05	0.000725861	yes	GO:0003824; GO:0050660; GO:0016614; GO:0055114; GO:0016491	catalytic activity; flavin adenine dinucleotide binding; oxidation-reduction process; oxidoreductase activity, acting on CH-OH group of donors; oxidoreductase activity	protein_coding
WBGene00005001	spp-16	V:10898465-10901288	N2	rnp-6	OK	8.33013	5.25616	-0.664329	-1.87173	0.00125	0.0117015	yes			protein_coding
WBGene00001991	hot-6	V:11021061-11022874	N2	rnp-6	OK	4.0488	1.82893	-1.1465	-2.29235	0.00035	0.00407043	yes	GO:0016021; GO:0016020	integral component of membrane; membrane	protein_coding
WBGene00000981	dhs-18	V:11044066-11046895	N2	rnp-6	OK	84.2372	46.4101	-0.860019	-3.96878	5e-05	0.000725861	yes			protein_coding
WBGene00011427	T04C12.1	V:11058648-11059264	N2	rnp-6	OK	1.30851	0	-inf		5e-05	0.000725861	yes	GO:0016021; GO:0016020; GO:0007165	signal transduction; integral component of membrane; membrane	protein_coding
WBGene00000065	act-3	V:11071683-11074498	N2	rnp-6	OK	84.1361	120.025	0.512534	2.67059	5e-05	0.000725861	yes	GO:0005856; GO:0005737; GO:0030866; GO:0000166; GO:0009792; GO:0000281; GO:0005865; GO:0005524	embryo development ending in birth or egg hatching; cortical actin cytoskeleton organization; cytoplasm; striated muscle thin filament; mitotic cytokinesis; ATP binding; cytoskeleton; nucleotide binding	protein_coding
WBGene00000064	act-2	V:11076736-11078168	N2	rnp-6	OK	517.941	636.046	0.296343	1.59451	0.0051	0.0356206	yes	GO:0005856; GO:0005737; GO:0000281; GO:0030866; GO:0000166; GO:0040011; GO:0009792; GO:0005938; GO:0007111; GO:0005524; GO:0005884	actin filament; embryo development ending in birth or egg hatching; cortical actin cytoskeleton organization; meiosis II cytokinesis; cytoplasm; cell cortex; mitotic cytokinesis; ATP binding; locomotion; cytoskeleton; nucleotide binding	protein_coding
WBGene00012778	Y42A5A.3	V:11088153-11097978	N2	rnp-6	OK	6.74465	2.36401	-1.51251	-1.91215	0.0053	0.0367133	yes			protein_coding
WBGene00010525	K03B8.8	V:11407522-11411019	N2	rnp-6	OK	1.93073	0.539151	-1.84039	-2.39157	0.0013	0.0120757	yes			protein_coding
WBGene00000982	dhs-19	V:11489048-11490361	N2	rnp-6	OK	34.6739	26.2329	-0.402472	-1.73324	0.00255	0.0206975	yes	GO:0016021; GO:0016020	integral component of membrane; membrane	protein_coding
WBGene00011713	T11F9.12	V:11493555-11496373	N2	rnp-6	OK	4.81623	6.95845	0.530861	2.01157	0.00055	0.00597832	yes			protein_coding
WBGene00008333	C55A6.4	V:11516443-11517885	N2	rnp-6	OK	1.027	0.483866	-1.08576	-1.63564	0.00735	0.0471344	yes			protein_coding
WBGene00004359	rhr-2	V:11727897-11730160	N2	rnp-6	OK	1.91719	1.06014	-0.854746	-1.88441	0.0026	0.0210083	yes	GO:0006810; GO:0008519; GO:0016021; GO:0016020; GO:0072488; GO:0015695; GO:0005887; GO:0015696	integral component of plasma membrane; ammonium transmembrane transport; ammonium transmembrane transporter activity; ammonium transport; membrane; organic cation transport; integral component of membrane; transport	protein_coding
WBGene00003235	mif-2	V:11976773-11978404	N2	rnp-6	OK	46.8225	34.0126	-0.461132	-1.66281	0.00425	0.0309824	yes			protein_coding
WBGene00011090	R07B7.6	V:12072876-12074986	N2	rnp-6	OK	4.42877	2.92182	-0.600037	-1.76189	0.00265	0.0213265	yes	GO:0008375; GO:0016021; GO:0016020	acetylglucosaminyltransferase activity; integral component of membrane; membrane	protein_coding
WBGene00007548	C13C4.4	V:12109167-12110978	N2	rnp-6	OK	2.17211	1.17242	-0.889604	-1.75791	0.00515	0.0358984	yes	GO:0016311; GO:0016791	phosphatase activity; dephosphorylation	protein_coding
WBGene00007551	C13C4.7	V:12118991-12120814	N2	rnp-6	OK	2.91739	1.18187	-1.3036	-2.46664	0.00015	0.00195025	yes	; GO:0046872; GO:0016702; GO:0005515; GO:0055114	oxidoreductase activity, acting on single donors with incorporation of molecular oxygen, incorporation of two atoms of oxygen; protein binding; metal ion binding; ; oxidation-reduction process	protein_coding
WBGene00003515	myo-3	V:12226815-12234343	N2	rnp-6	OK	19.1342	27.5249	0.524583	2.72511	5e-05	0.000725861	yes	GO:0005737; GO:0007626; GO:0032982; GO:0031672; GO:0030016; GO:0000166; GO:0003779; GO:0016459; GO:0060279; GO:0005515; GO:0005863; GO:0003774; GO:0005524	actin binding; motor activity; cytoplasm; striated muscle myosin thick filament; myosin complex; positive regulation of ovulation; A band; ATP binding; protein binding; myosin filament; nucleotide binding; myofibril; locomotory behavior	protein_coding
WBGene00009096	fipr-1	V:12358646-12363691	N2	rnp-6	OK	33.84	22.005	-0.620898	-1.83058	0.0012	0.0113201	yes			protein_coding
WBGene00010470	cdr-4	V:12407363-12408592	N2	rnp-6	OK	10.3179	6.02104	-0.77706	-2.39496	5e-05	0.000725861	yes	GO:0005764; GO:1990170; GO:0045087; GO:0030968	stress response to cadmium ion; innate immune response; endoplasmic reticulum unfolded protein response; lysosome	protein_coding
WBGene00008296	cdr-2	V:12414621-12415711	N2	rnp-6	OK	11.3495	4.75127	-1.25624	-3.68044	5e-05	0.000725861	yes	GO:1990170; GO:0016021; GO:0016020; GO:0060625	stress response to cadmium ion; integral component of membrane; regulation of protein deneddylation; membrane	protein_coding
WBGene00008304	C54D10.10	V:12448680-12450004	N2	rnp-6	OK	1.9027	0.883634	-1.10653	-1.66038	0.0074	0.0473757	yes	GO:0010951; GO:0004867	serine-type endopeptidase inhibitor activity; negative regulation of endopeptidase activity	protein_coding
WBGene00001429	fkb-4	V:12785152-12787104	N2	rnp-6	OK	1.76311	0.605043	-1.54302	-2.52804	0.00045	0.00504819	yes	GO:0005737; GO:0000413; GO:0006457; GO:0016853; GO:0005528; GO:0003755; GO:0061077	peptidyl-prolyl cis-trans isomerase activity; protein peptidyl-prolyl isomerization; cytoplasm; protein folding; isomerase activity; chaperone-mediated protein folding; FK506 binding	protein_coding
WBGene00013906	ugt-5	V:12790699-12792965	N2	rnp-6	OK	6.5708	4.34335	-0.597261	-1.9299	0.00065	0.0068644	yes	GO:0008152; GO:0016021; GO:0016020; GO:0016740; GO:0016757; GO:0016758; GO:0015020	transferase activity, transferring glycosyl groups; transferase activity; membrane; transferase activity, transferring hexosyl groups; metabolic process; glucuronosyltransferase activity; integral component of membrane	protein_coding
WBGene00008102	C44H9.7	V:12853014-12854839	N2	rnp-6	OK	2.09321	0.171732	-3.60749	-3.6225	5e-05	0.000725861	yes	; GO:0016021; GO:0016020	; integral component of membrane; membrane	protein_coding
WBGene00011283	R90.1	V:12891526-12895872	N2	rnp-6	OK	5.70552	4.12549	-0.467795	-1.70524	0.00335	0.0256524	yes	GO:0005737; GO:0006468; GO:0018105; GO:0005634; GO:0004674; GO:0008360; GO:0004672; GO:0005524	protein phosphorylation; cytoplasm; regulation of cell shape; peptidyl-serine phosphorylation; protein kinase activity; nucleus; ATP binding; protein serine/threonine kinase activity	protein_coding
WBGene00011798	T16G1.4	V:12940037-12941847	N2	rnp-6	OK	6.88618	4.75546	-0.534117	-1.70516	0.00355	0.0268498	yes			protein_coding
WBGene00001387	far-3	V:12995600-12997524	N2	rnp-6	OK	47.747	134.802	1.49736	6.61022	5e-05	0.000725861	yes	GO:0008289	lipid binding	protein_coding
WBGene00007153	clec-41	V:13134964-13138086	N2	rnp-6	OK	53.4828	95.2358	0.83243	4.20357	5e-05	0.000725861	yes	GO:0045087; GO:0030246	innate immune response; carbohydrate binding	protein_coding
WBGene00000732	col-159	V:13198229-13199315	N2	rnp-6	OK	9.57766	21.7113	1.1807	4.33004	5e-05	0.000725861	yes	GO:0016021; GO:0016020; GO:0005581; GO:0042302	structural constituent of cuticle; collagen trimer; integral component of membrane; membrane	protein_coding
WBGene00000733	col-160	V:13200981-13202189	N2	rnp-6	OK	100.685	185.337	0.880296	4.50473	5e-05	0.000725861	yes	GO:0016021; GO:0016020; GO:0005581; GO:0042302	structural constituent of cuticle; collagen trimer; integral component of membrane; membrane	protein_coding
WBGene00000734	col-161	V:13317031-13318010	N2	rnp-6	OK	0.498324	1.28819	1.37019	1.85186	0.0041	0.0300971	yes	GO:0016021; GO:0016020; GO:0005581; GO:0042302	structural constituent of cuticle; collagen trimer; integral component of membrane; membrane	protein_coding
WBGene00003719	nhr-129	V:13329192-13331019	N2	rnp-6	OK	0.876052	0.353097	-1.31095	-1.89076	0.0023	0.0191136	yes	GO:0043565; GO:0003700; GO:0005634; GO:0003707; GO:0006355; GO:0008270; GO:0043401; GO:0003677; GO:0046872; GO:0006351	steroid hormone mediated signaling pathway; regulation of transcription, DNA-templated; DNA binding; zinc ion binding; nucleus; metal ion binding; sequence-specific DNA binding; transcription, DNA-templated; steroid hormone receptor activity; DNA binding transcription factor activity	protein_coding
WBGene00009347	F32H5.1	V:13346277-13358037	N2	rnp-6	OK	18.0258	11.9254	-0.596022	-2.17454	0.00015	0.00195025	yes	GO:0051603; GO:0005615; GO:0005764; GO:0004197; GO:0006508; GO:0008234	extracellular space; lysosome; cysteine-type endopeptidase activity; proteolysis involved in cellular protein catabolic process; proteolysis; cysteine-type peptidase activity	protein_coding
WBGene00010868	somi-1	V:13386062-13391393	N2	rnp-6	OK	9.66519	6.08513	-0.66751	-2.61572	5e-05	0.000725861	yes	GO:0005634; GO:0000228	nuclear chromosome; nucleus	protein_coding
WBGene00001479	fmo-4	V:13603294-13606701	N2	rnp-6	OK	16.0511	21.2856	0.407205	1.80338	0.0019	0.0163938	yes	GO:0004497; GO:0050660; GO:0016021; GO:0016020; GO:0004499; GO:0050661; GO:0055114; GO:0016491	N,N-dimethylaniline monooxygenase activity; flavin adenine dinucleotide binding; monooxygenase activity; NADP binding; oxidation-reduction process; membrane; integral component of membrane; oxidoreductase activity	protein_coding
WBGene00010426	H37A05.2	V:13629838-13634220	N2	rnp-6	OK	0.293367	0.699019	1.25262	1.6912	0.00665	0.0436819	yes			protein_coding
WBGene00009431	dct-17	V:13727760-13730776	N2	rnp-6	OK	2.08217	0.998053	-1.0609	-2.405	0.00015	0.00195025	yes	GO:0050829; ; GO:0045087; GO:0045121	; innate immune response; membrane raft; defense response to Gram-negative bacterium	protein_coding
WBGene00009428	F35E12.4	V:13731505-13733387	N2	rnp-6	OK	5.0316	2.59844	-0.953372	-2.58172	5e-05	0.000725861	yes
WBGene00009429	F35E12.5	V:13737006-13738471	N2	rnp-6	OK	4.89527	3.11652	-0.651455	-1.76054	0.00285	0.0225677	yes	GO:0050829; GO:0045087; GO:0045121; GO:0050830	innate immune response; defense response to Gram-positive bacterium; membrane raft; defense response to Gram-negative bacterium	protein_coding
WBGene00008986	F20G2.2	V:13755010-13756409	N2	rnp-6	OK	16.5815	11.5807	-0.517849	-1.75901	0.0028	0.0222533	yes			protein_coding
WBGene00007365	C06B3.6	V:13908127-13909513	N2	rnp-6	OK	133.342	103.418	-0.366648	-1.76365	0.00175	0.015327	yes			protein_coding
WBGene00011185	R10D12.1	V:13932580-13934645	N2	rnp-6	OK	6.84767	4.92298	-0.47608	-1.61259	0.005	0.035079	yes	GO:0022857; GO:0016021; GO:0016020; GO:0006820; GO:0055085	anion transport; transmembrane transport; transmembrane transporter activity; integral component of membrane; membrane	protein_coding
WBGene00003474	mtl-2	V:14018271-14018643	N2	rnp-6	OK	108.128	56.492	-0.936619	-3.35057	5e-05	0.000725861	yes	GO:0046872	metal ion binding	protein_coding
WBGene00008392	D1086.5	V:14088892-14090323	N2	rnp-6	OK	12.8394	4.10779	-1.64414	-4.50981	5e-05	0.000725861	yes			protein_coding
WBGene00009805	F47B8.4	V:14323531-14324631	N2	rnp-6	OK	7.73112	1.71843	-2.16958	-5.02361	5e-05	0.000725861	yes	GO:0045087; GO:0005623; GO:0045454; GO:0015035; GO:0055114; GO:0009055	innate immune response; electron transfer activity; cell; protein disulfide oxidoreductase activity; oxidation-reduction process; cell redox homeostasis	protein_coding
WBGene00219979	F56A12.11	V:14359108-14359253	N2	rnp-6	OK	154.722	275.59	0.83285	1.99829	0.0007	0.00728567	yes
WBGene00012364	W09D12.1	V:14917743-14921609	N2	rnp-6	OK	16.7958	8.77621	-0.936434	-3.61104	5e-05	0.000725861	yes	GO:0016787; GO:0004222; GO:0031012; GO:0008270; GO:0006508; GO:0008233; GO:0046872; GO:0008237	extracellular matrix; hydrolase activity; metalloendopeptidase activity; zinc ion binding; peptidase activity; metal ion binding; metallopeptidase activity; proteolysis	protein_coding
WBGene00004747	sdc-3	V:15039356-15048209	N2	rnp-6	OK	12.3211	15.9869	0.375763	1.87025	0.0011	0.0105816	yes	GO:0043565; GO:0000070; GO:0042715; GO:0000122; GO:0005634; GO:0000805; GO:0003677; GO:0046872; GO:0005694; GO:0007275; GO:0007530	negative regulation of transcription from RNA polymerase II promoter; DNA binding; sex determination; X chromosome; nucleus; metal ion binding; dosage compensation complex assembly involved in dosage compensation by hypoactivation of X chromosome; multicellular organism development; mitotic sister chromatid segregation; chromosome; sequence-specific DNA binding	protein_coding
WBGene00007232	C01G10.5	V:15089101-15089499	N2	rnp-6	OK	0	1.22342	inf		0.002	0.017068	yes			protein_coding
WBGene00011340	ugt-30	V:15121728-15125214	N2	rnp-6	OK	0.131641	0.626646	2.25104	2.78849	0.0005	0.00551085	yes	GO:0008152; GO:0016021; GO:0016020; GO:0016740; GO:0016757; GO:0016758; GO:0015020; GO:0043231	transferase activity, transferring glycosyl groups; transferase activity; membrane; transferase activity, transferring hexosyl groups; metabolic process; glucuronosyltransferase activity; intracellular membrane-bounded organelle; integral component of membrane	protein_coding
WBGene00001150	ech-1.1	V:15357695-15360738	N2	rnp-6	OK	7.4668	27.0115	1.85501	8.04598	5e-05	0.000725861	yes	GO:0006631; GO:0016507; GO:0006635; GO:0004300; GO:0005739; GO:0003824; GO:0008152; GO:0003857; GO:0055114; GO:0016491	3-hydroxyacyl-CoA dehydrogenase activity; catalytic activity; fatty acid metabolic process; oxidoreductase activity; mitochondrial fatty acid beta-oxidation multienzyme complex; metabolic process; fatty acid beta-oxidation; oxidation-reduction process; enoyl-CoA hydratase activity; mitochondrion	protein_coding
WBGene00007368	C06B8.2	V:15471334-15478566	N2	rnp-6	OK	3.96077	0.940013	-2.07503	-3.36721	5e-05	0.000725861	yes			protein_coding
WBGene00007162	fbxa-153	V:15605723-15610380	N2	rnp-6	OK	4.35597	2.85665	-0.608672	-1.61382	0.00695	0.0452297	yes	GO:0005515	protein binding	protein_coding
WBGene00008824	F14H3.5	V:16055814-16057037	N2	rnp-6	OK	6.94282	10.634	0.615094	1.99054	0.0006	0.00643061	yes			protein_coding
WBGene00008831	F14H3.12	V:16074112-16075321	N2	rnp-6	OK	15.6218	10.5335	-0.56858	-1.59278	0.00695	0.0452297	yes	GO:0004674; GO:0006468; GO:0000226; GO:0030010	protein serine/threonine kinase activity; microtubule cytoskeleton organization; establishment of cell polarity; protein phosphorylation	protein_coding
WBGene00045507	F10A3.17	V:16158670-16159781	N2	rnp-6	OK	13.7308	10.0211	-0.454367	-1.60962	0.00555	0.0380172	yes			protein_coding
WBGene00011753	T13F3.6	V:16270215-16271221	N2	rnp-6	OK	5.13434	1.61984	-1.66433	-3.15739	5e-05	0.000725861	yes			protein_coding
WBGene00000782	cpr-2	V:16532988-16534110	N2	rnp-6	OK	0.887383	0.15069	-2.55797	-2.64713	0.0047	0.0334361	yes	GO:0051603; GO:0005615; GO:0005764; GO:0004197; GO:0006508; GO:0008233; GO:0008234	extracellular space; lysosome; peptidase activity; cysteine-type endopeptidase activity; proteolysis involved in cellular protein catabolic process; proteolysis; cysteine-type peptidase activity	protein_coding
WBGene00006585	tni-3	V:16833315-16839071	N2	rnp-6	OK	11.0712	16.6343	0.587349	2.04786	0.0007	0.00728567	yes	GO:0030016; GO:0018991; GO:0006936; GO:0003779; GO:0030017; GO:0030172; GO:0040032; GO:0046872; GO:0005861	post-embryonic body morphogenesis; actin binding; troponin complex; muscle contraction; oviposition; metal ion binding; sarcomere; troponin C binding; myofibril	protein_coding
WBGene00011487	T05E12.6	V:17084998-17090023	N2	rnp-6	OK	1.23487	9.24877	2.9049	8.17016	5e-05	0.000725861	yes			protein_coding
WBGene00195233	F31E9.11	V:17315590-17315954	N2	rnp-6	OK	26.8085	15.3733	-0.802261	-2.02633	0.0009	0.00897191	yes
WBGene00009295	fbxa-180	V:17319595-17322444	N2	rnp-6	OK	2.70288	3.96867	0.554161	1.77281	0.00195	0.0167396	yes
WBGene00008127	ddo-1	V:17774244-17777229	N2	rnp-6	OK	9.84567	3.23765	-1.60454	-4.45768	5e-05	0.000725861	yes	GO:0008445; GO:0005777; GO:0003884; GO:0048037; GO:0055114; GO:0047821; GO:0046416; GO:0071949; GO:0016491	cofactor binding; D-amino acid metabolic process; D-amino-acid oxidase activity; FAD binding; oxidoreductase activity; oxidation-reduction process; peroxisome; D-aspartate oxidase activity; D-glutamate oxidase activity	protein_coding
WBGene00001080	dpy-21	V:17936331-17949028	N2	rnp-6	OK	14.4819	18.6473	0.364716	1.7643	0.00195	0.0167396	yes	GO:0005634; GO:0000805; GO:0005694	X chromosome; nucleus; chromosome	protein_coding
WBGene00012567	Y37H2A.7	V:18133299-18134478	N2	rnp-6	OK	4.34283	6.5865	0.600877	1.68395	0.00375	0.0280629	yes	GO:0005515	protein binding	protein_coding
WBGene00011213	R10E8.8	V:18238117-18240729	N2	rnp-6	OK	14.3329	9.16048	-0.645836	-2.28901	5e-05	0.000725861	yes	; GO:0005515	; protein binding	protein_coding
WBGene00011207	R10E8.1	V:18242322-18252416	N2	rnp-6	OK	5.11114	7.75655	0.60177	2.07012	0.0003	0.00356315	yes			protein_coding
WBGene00194695	B0462.5	V:18322214-18323327	N2	rnp-6	OK	1.15186	4.78213	2.05368	3.99632	5e-05	0.000725861	yes			protein_coding
WBGene00013946	ZK228.3	V:18458235-18461231	N2	rnp-6	OK	4.1826	2.67811	-0.643183	-1.61596	0.00655	0.043217	yes			protein_coding
WBGene00013079	ttr-26	V:18558734-18560306	N2	rnp-6	OK	19.2429	31.8402	0.726523	2.52644	5e-05	0.000725861	yes	GO:0005615	extracellular space	protein_coding
WBGene00005191	srg-34	V:18562177-18564881	N2	rnp-6	OK	1.65139	0.885687	-0.898812	-1.61602	0.00725	0.0466777	yes	GO:0007606; GO:0004888; GO:0016021; GO:0016020; GO:0007165	sensory perception of chemical stimulus; transmembrane signaling receptor activity; signal transduction; integral component of membrane; membrane	protein_coding
WBGene00050884	Y69H2.15	V:18623208-18626852	N2	rnp-6	OK	0.389401	0.914727	1.23209	1.94397	0.00255	0.0206975	yes	GO:0005515	protein binding	protein_coding
WBGene00013481	Y69H2.3	V:18650342-18664116	N2	rnp-6	OK	44.8884	59.5436	0.407604	2.00458	0.00045	0.00504819	yes	; GO:0005515	; protein binding	protein_coding
WBGene00006714	ubc-19	V:18685059-18689843	N2	rnp-6	OK	7.74429	5.28595	-0.550969	-1.66067	0.00455	0.0326223	yes	GO:0005737; GO:0031625; GO:0043161; GO:0005634; GO:0061630; GO:0000209	ubiquitin protein ligase activity; cytoplasm; ubiquitin protein ligase binding; nucleus; proteasome-mediated ubiquitin-dependent protein catabolic process; protein polyubiquitination	protein_coding
WBGene00012452	Y17D7B.4	V:18776198-18780216	N2	rnp-6	OK	34.0383	20.8083	-0.709997	-2.57095	5e-05	0.000725861	yes			protein_coding
WBGene00008310	C54E10.6	V:18808079-18808661	N2	rnp-6	OK	7.50935	3.475	-1.11167	-1.94257	0.00175	0.015327	yes			protein_coding
WBGene00001258	emb-4	V:18860287-18894974	N2	rnp-6	OK	56.3155	72.6204	0.366842	1.90105	0.00105	0.0101691	yes	; GO:0005634; GO:0005681; GO:0000398	; mRNA splicing, via spliceosome; nucleus; spliceosomal complex	protein_coding
WBGene00013587	Y80D3A.9	V:18953136-18957306	N2	rnp-6	OK	13.5441	6.19853	-1.12767	-3.46955	5e-05	0.000725861	yes			protein_coding
WBGene00012683	asp-17	V:19035714-19037320	N2	rnp-6	OK	2.81528	4.6987	0.738983	2.0552	0.00065	0.0068644	yes	GO:0016787; GO:0008233; GO:0004190; GO:0030163; GO:0006508	hydrolase activity; peptidase activity; proteolysis; aspartic-type endopeptidase activity; protein catabolic process	protein_coding
WBGene00010105	fbxb-62	V:19301075-19302030	N2	rnp-6	OK	3.02109	1.54992	-0.962871	-1.93809	0.0015	0.0135324	yes	GO:0005515	protein binding	protein_coding
WBGene00044197	fbxb-63	V:19302729-19303728	N2	rnp-6	OK	4.1433	2.46935	-0.74665	-1.76288	0.0034	0.0259387	yes	GO:0005515	protein binding	protein_coding
WBGene00007725	C25F9.5	V:19407719-19410848	N2	rnp-6	OK	2.4008	1.16247	-1.04632	-2.73663	5e-05	0.000725861	yes	GO:0005524	ATP binding	protein_coding
WBGene00045411	C25F9.11	V:19432440-19433072	N2	rnp-6	OK	19.8668	33.4887	0.753313	2.72451	5e-05	0.000725861	yes			protein_coding
WBGene00010850	M04C3.1	V:19437941-19445577	N2	rnp-6	OK	8.68338	6.38247	-0.444143	-1.86968	0.0012	0.0113201	yes	GO:0005524	ATP binding	protein_coding
WBGene00012813	Y43F8B.2	V:19503111-19533110	N2	rnp-6	OK	76.1531	107.009	0.490754	2.43316	5e-05	0.000725861	yes	GO:0005737; GO:0045087; GO:0055120; GO:0005515	cytoplasm; protein binding; striated muscle dense body; innate immune response	protein_coding
WBGene00012812	Y43F8B.1	V:19534884-19546200	N2	rnp-6	OK	15.1943	21.8463	0.52386	2.01571	0.0008	0.00816818	yes			protein_coding
WBGene00012834	Y43F8C.13	V:19693895-19697398	N2	rnp-6	OK	9.97535	7.20455	-0.469459	-1.57048	0.0065	0.0429476	yes	GO:0006152; GO:0008477; GO:0005829	cytosol; purine nucleoside catabolic process; purine nucleosidase activity	protein_coding
WBGene00012247	W04E12.2	V:19739689-19741098	N2	rnp-6	OK	2.30011	3.75583	0.707429	1.5692	0.0077	0.0487669	yes	GO:0016021; GO:0016020	integral component of membrane; membrane	protein_coding
WBGene00012253	clec-50	V:19752400-19755363	N2	rnp-6	OK	120.507	154.714	0.360489	1.84676	0.00105	0.0101691	yes	GO:0004888; GO:0007165; GO:0005887; GO:0030246	integral component of plasma membrane; signal transduction; carbohydrate binding; transmembrane signaling receptor activity	protein_coding
WBGene00003959	pcp-4	V:19822617-19830099	N2	rnp-6	OK	0.755521	1.504	0.993265	2.65737	5e-05	0.000725861	yes	GO:0008239; GO:0006508; GO:0045121; GO:0008236	proteolysis; dipeptidyl-peptidase activity; membrane raft; serine-type peptidase activity	protein_coding
WBGene00008944	F19B2.5	V:20162647-20163732	N2	rnp-6	OK	47.4764	24.2035	-0.971994	-3.82408	5e-05	0.000725861	yes	GO:0005524	ATP binding	protein_coding
WBGene00004203	swsn-1	V:20239243-20249484	N2	rnp-6	OK	35.6776	45.3474	0.346	1.72271	0.0026	0.0210083	yes	GO:0040010; GO:0040027; GO:0000003; GO:0006338; GO:0006357; GO:0040018; GO:0005634; GO:0002119; GO:0035262; GO:0009792; GO:0042802; GO:0005515; GO:0003677; GO:0090544; GO:0040035; GO:0046662; GO:0002009	positive regulation of multicellular organism growth; nematode larval development; embryo development ending in birth or egg hatching; positive regulation of growth rate; regulation of oviposition; protein binding; DNA binding; hermaphrodite genitalia development; identical protein binding; BAF-type complex; nucleus; gonad morphogenesis; reproduction; regulation of transcription from RNA polymera…	protein_coding
WBGene00012615	dct-16	V:20497914-20499073	N2	rnp-6	OK	773.627	487.114	-0.667379	-3.42864	5e-05	0.000725861	yes			protein_coding
WBGene00012629	slc-36.3	V:20540394-20544192	N2	rnp-6	OK	1.02385	0.156796	-2.70704	-3.14671	0.00035	0.00407043	yes	GO:0005774; GO:0016021; GO:0016020; GO:0003333; GO:0015171	amino acid transmembrane transport; amino acid transmembrane transporter activity; vacuolar membrane; integral component of membrane; membrane	protein_coding
WBGene00086569	F38A6.5	V:20772535-20773736	N2	rnp-6	OK	5.13101	2.7058	-0.923187	-1.97233	0.0016	0.014229	yes			protein_coding
WBGene00011393	T03D8.6	V:20816575-20820161	N2	rnp-6	OK	5.94403	4.23385	-0.489471	-1.65095	0.00465	0.03317	yes	GO:0016021; GO:0016020; GO:0036374; GO:0003840; GO:0006749; GO:0006751; GO:0006508	glutathione metabolic process; obsolete gamma-glutamyltransferase activity; glutathione catabolic process; membrane; proteolysis; glutathione hydrolase activity; integral component of membrane	protein_coding
WBGene00000139	amx-3	V:20898936-20903441	N2	rnp-6	OK	1.74139	0.930375	-0.904355	-1.78822	0.00375	0.0280629	yes	GO:0055114; GO:0016491	oxidation-reduction process; oxidoreductase activity	protein_coding
WBGene00020082	gcp-2.1	X:301831-308296	N2	rnp-6	OK	19.7514	14.2459	-0.471404	-1.4297	0.0053	0.0367133	yes	; GO:0016787; GO:0004180; GO:0016021; GO:0016020; GO:0006508; GO:0008233; GO:0046872; GO:0004181; GO:0008237	; carboxypeptidase activity; hydrolase activity; metallocarboxypeptidase activity; peptidase activity; metal ion binding; membrane; metallopeptidase activity; proteolysis; integral component of membrane	protein_coding
WBGene00173568	gcp-2.1	X:301831-308296	N2	rnp-6	OK	19.7514	14.2459	-0.471404	-1.4297	0.0053	0.0367133	yes
WBGene00023458	M02E1.3	X:322522-323214	N2	rnp-6	OK	4.12771	2.08496	-0.985322	-1.75013	0.0047	0.0334361	yes			protein_coding
WBGene00000608	col-19	X:421706-422776	N2	rnp-6	OK	356.011	461.466	0.374304	1.97793	0.00085	0.00858204	yes	GO:0040002; GO:0060111; GO:0005581; GO:0042329; GO:0042338; GO:0005576; GO:0060102; GO:0042302; GO:0060107	alae of collagen and cuticulin-based cuticle extracellular matrix; collagen and cuticulin-based cuticle development; cuticle development involved in collagen and cuticulin-based cuticle molting cycle; annuli extracellular matrix; extracellular region; collagen and cuticulin-based cuticle extracellular matrix; structural constituent of collagen and cuticulin-based cuticle; structural constituent o…	protein_coding
WBGene00018682	aagr-4	X:460650-466972	N2	rnp-6	OK	9.64128	5.64385	-0.772545	-3.13151	5e-05	0.000725861	yes	GO:0016787; GO:0005975; GO:0030246; GO:0016798; GO:0003824; GO:0008152; GO:0004553	hydrolase activity, acting on glycosyl bonds; carbohydrate binding; hydrolase activity, hydrolyzing O-glycosyl compounds; hydrolase activity; catalytic activity; carbohydrate metabolic process; metabolic process	protein_coding
WBGene00017423	F13C5.2	X:593959-596299	N2	rnp-6	OK	32.6309	25.7322	-0.342666	-1.56473	0.00685	0.0447412	yes	GO:0005515	protein binding	protein_coding
WBGene00020215	T04G9.4	X:772404-775373	N2	rnp-6	OK	7.5355	4.56721	-0.722388	-2.21297	5e-05	0.000725861	yes	GO:0019878; GO:0008897; GO:0000287	holo-[acyl-carrier-protein] synthase activity; lysine biosynthetic process via aminoadipic acid; magnesium ion binding	protein_coding
WBGene00016641	C44C1.1	X:980775-983029	N2	rnp-6	OK	11.7779	6.05029	-0.960999	-2.98599	5e-05	0.000725861	yes	GO:0016021; GO:0016020	integral component of membrane; membrane	protein_coding
WBGene00023069	rncs-1	X:1011500-1012347	N2	rnp-6	OK	13.1081	6.38316	-1.03812	-3.10962	5e-05	0.000725861	yes
WBGene00002062	ife-4	X:1104211-1106247	N2	rnp-6	OK	12.3105	8.3716	-0.556315	-1.78491	0.00205	0.0174119	yes	GO:0005737; GO:0000340; GO:0003723; GO:0006417; GO:0006413; GO:0006412; GO:0003743	RNA 7-methylguanosine cap binding; RNA binding; translation initiation factor activity; cytoplasm; regulation of translation; translational initiation; translation	protein_coding
WBGene00015471	lmp-2	X:1125169-1128288	N2	rnp-6	OK	6.36019	3.85792	-0.721248	-2.00209	0.0011	0.0105816	yes	GO:0016021; GO:0016020	integral component of membrane; membrane	protein_coding
WBGene00016874	C52B11.5	X:1272821-1275410	N2	rnp-6	OK	9.6094	6.6312	-0.535177	-1.72786	0.00315	0.0244316	yes	GO:0005829; GO:0007264; GO:0003924; GO:0042147; GO:0005525	cytosol; retrograde transport, endosome to Golgi; small GTPase mediated signal transduction; GTPase activity; GTP binding	protein_coding
WBGene00019272	H42K12.3	X:1311604-1316636	N2	rnp-6	OK	2.66556	0.947479	-1.49227	-3.43446	5e-05	0.000725861	yes	GO:0042335; GO:0002064	epithelial cell development; cuticle development	protein_coding
WBGene00195185	F19G12.9	X:1419619-1420181	N2	rnp-6	OK	19.5341	9.88836	-0.982192	-2.12936	0.0009	0.00897191	yes			protein_coding
WBGene00016995	acly-1	X:1479541-1484398	N2	rnp-6	OK	20.7345	26.7011	0.364865	1.82958	0.0021	0.0177668	yes	GO:0005737; GO:0006633; GO:0046912; GO:0006629; GO:0006085; GO:0005829; GO:0003878; GO:0000166; GO:0003824; GO:0016740; GO:0048037; GO:0008152; GO:0006101; GO:0046872; GO:0009346; GO:0005524	cofactor binding; catalytic activity; ATP citrate synthase activity; cytosol; transferase activity; transferase activity, transferring acyl groups, acyl groups converted into alkyl on transfer; fatty acid biosynthetic process; metabolic process; acetyl-CoA biosynthetic process; citrate lyase complex; ATP binding; lipid metabolic process; cytoplasm; citrate metabolic process; nucleotide binding; m…	protein_coding
WBGene00019146	H02F09.3	X:1568677-1572854	N2	rnp-6	OK	4.6324	2.76927	-0.742256	-2.73653	5e-05	0.000725861	yes	GO:0016021; GO:0016020	integral component of membrane; membrane	protein_coding
WBGene00019187	H11E01.2	X:1621480-1625288	N2	rnp-6	OK	5.8939	3.33847	-0.820036	-2.48901	5e-05	0.000725861	yes	GO:0022857; GO:0016021; GO:0016020; GO:0006820; GO:0055085	anion transport; transmembrane transport; transmembrane transporter activity; integral component of membrane; membrane	protein_coding
WBGene00016485	meg-4	X:1682951-1686383	N2	rnp-6	OK	11.651	15.2662	0.38988	1.74595	0.0023	0.0191136	yes	GO:1903863; GO:0043186; GO:0051640; GO:0005515; GO:0036093	germ cell proliferation; protein binding; organelle localization; P granule; P granule assembly	protein_coding
WBGene00219451	F52D2.12	X:1978070-1980896	N2	rnp-6	OK	8.285	11.5045	0.473626	1.96119	0.0011	0.0105816	yes			protein_coding
WBGene00022413	Y102A11A.3	X:2019169-2025737	N2	rnp-6	OK	11.0739	8.69503	-0.348896	-1.64279	0.00415	0.0303769	yes			protein_coding
WBGene00018656	F49H12.5	X:2074447-2075944	N2	rnp-6	OK	5.05752	2.35276	-1.10408	-2.7327	5e-05	0.000725861	yes	GO:0060548; GO:0030154; GO:0005783	negative regulation of cell death; endoplasmic reticulum; cell differentiation	protein_coding
WBGene00003087	lsy-2	X:2089665-2093246	N2	rnp-6	OK	20.2841	30.47	0.587039	2.64824	5e-05	0.000725861	yes	GO:0003676	nucleic acid binding	protein_coding
WBGene00018589	F48B9.3	X:2165108-2173837	N2	rnp-6	OK	0.629997	0.187659	-1.74723	-2.08452	0.00335	0.0256524	yes	GO:0016021; GO:0016020	integral component of membrane; membrane	protein_coding
WBGene00020509	hex-1	X:2223483-2226620	N2	rnp-6	OK	32.5518	23.1968	-0.48881	-2.27293	5e-05	0.000725861	yes	GO:0016787; GO:0005975; GO:0016798; GO:0015929; GO:0005575; GO:0004563; GO:0005764; GO:0008152; GO:0004553	hydrolase activity, acting on glycosyl bonds; hydrolase activity, hydrolyzing O-glycosyl compounds; hydrolase activity; beta-N-acetylhexosaminidase activity; hexosaminidase activity; carbohydrate metabolic process; cellular_component; metabolic process; lysosome	protein_coding
WBGene00016617	C43H6.4	X:2404023-2407360	N2	rnp-6	OK	8.68771	6.03869	-0.524741	-2.00285	0.0007	0.00728567	yes	GO:0005488	binding	protein_coding
WBGene00016614	trpp-12	X:2409689-2412966	N2	rnp-6	OK	5.42729	3.75324	-0.532096	-1.62091	0.005	0.035079	yes	GO:0006508; GO:0004175	proteolysis; endopeptidase activity	protein_coding
WBGene00019318	K02E10.4	X:2483262-2488296	N2	rnp-6	OK	2.19637	0.522455	-2.07174	-3.91135	5e-05	0.000725861	yes	GO:0016021; GO:0016020	integral component of membrane; membrane	protein_coding
WBGene00019317	K02E10.1	X:2496270-2501001	N2	rnp-6	OK	4.08337	2.58496	-0.659615	-1.7198	0.0048	0.0339756	yes	GO:0005794; GO:0009306; GO:0006904; GO:0003924; GO:0017157; GO:0032869; GO:0032593; GO:0007264; GO:0005525	vesicle docking involved in exocytosis; Golgi apparatus; GTPase activity; cellular response to insulin stimulus; regulation of exocytosis; GTP binding; protein secretion; small GTPase mediated signal transduction; insulin-responsive compartment	protein_coding
WBGene00020194	T03G6.1	X:2608227-2609989	N2	rnp-6	OK	2.80195	0.575444	-2.28368	-3.85488	5e-05	0.000725861	yes			protein_coding
WBGene00015748	C14A11.2	X:2803111-2804830	N2	rnp-6	OK	0.989638	0.354215	-1.48227	-1.90726	0.00495	0.0348181	yes			protein_coding
WBGene00022200	fard-1	X:2933360-2937742	N2	rnp-6	OK	75.5654	43.7057	-0.789905	-3.9808	5e-05	0.000725861	yes	GO:0080019; GO:0006629; GO:0005777; GO:0010025; GO:0035336; GO:0055114; GO:0016491	long-chain fatty-acyl-CoA metabolic process; fatty-acyl-CoA reductase (alcohol-forming) activity; wax biosynthetic process; oxidoreductase activity; oxidation-reduction process; lipid metabolic process; peroxisome	protein_coding
WBGene00022199	pfk-1.1	X:2940871-2945489	N2	rnp-6	OK	25.3386	34.2504	0.434786	2.1592	0.0002	0.00250605	yes	GO:0005737; GO:0016310; GO:0016301; GO:0000166; GO:0003824; GO:0016740; GO:0006002; GO:0008152; GO:0003872; GO:0046872; GO:0006096; GO:0005524; GO:0061615	6-phosphofructokinase activity; catalytic activity; transferase activity; fructose 6-phosphate metabolic process; phosphorylation; metabolic process; kinase activity; glycolytic process; ATP binding; cytoplasm; nucleotide binding; glycolytic process through fructose-6-phosphate; metal ion binding	protein_coding
WBGene00000175	aqp-7	X:3025061-3026971	N2	rnp-6	OK	30.5399	39.0322	0.353971	1.58583	0.0059	0.0398386	yes	GO:0006810; GO:0005215; GO:0016021; GO:0016020; GO:0015250; GO:0006833; GO:0015793; GO:0022838; GO:0055085	transporter activity; integral component of membrane; water transport; glycerol transport; water channel activity; membrane; substrate-specific channel activity; transmembrane transport; transport	protein_coding
WBGene00019738	clec-265	X:3031722-3033203	N2	rnp-6	OK	4.618	6.64198	0.524344	1.62	0.0047	0.0334361	yes	GO:0030246	carbohydrate binding	protein_coding
WBGene00000451	ceh-30	X:3063494-3065551	N2	rnp-6	OK	1.40445	0.680473	-1.0454	-1.70607	0.00685	0.0447412	yes	GO:0043565; GO:0009888; GO:0007548; GO:0007399; GO:0048513; GO:0005634; GO:0030154; GO:0006366; GO:0001228; GO:0006355; GO:0006357; GO:0045944; GO:0006351; GO:0003677; GO:0043066; GO:0003674; GO:0007275; GO:0000977	sex differentiation; molecular_function; negative regulation of apoptotic process; transcriptional activator activity, RNA polymerase II transcription regulatory region sequence-specific DNA binding; animal organ development; regulation of transcription, DNA-templated; DNA binding; cell differentiation; multicellular organism development; nucleus; sequence-specific DNA binding; positive regulatio…	protein_coding
WBGene00018701	pccb-1	X:3089495-3094372	N2	rnp-6	OK	50.316	63.9364	0.345621	1.77517	0.0023	0.0191136	yes	GO:0009062; GO:0016874; GO:0016421	fatty acid catabolic process; CoA carboxylase activity; ligase activity	protein_coding
WBGene00019609	K10B3.1	X:3135492-3136650	N2	rnp-6	OK	13.0586	7.07678	-0.883838	-1.77176	0.0029	0.0228734	yes			protein_coding
WBGene00017381	ddr-2	X:3315320-3324229	N2	rnp-6	OK	3.75585	2.12322	-0.822888	-2.63258	5e-05	0.000725861	yes	GO:0097376; ; GO:0006468; GO:0016301; GO:0043204; GO:0007399; GO:0016310; GO:0016021; GO:0016020; GO:0004714; GO:0018108; GO:0000166; GO:0016740; GO:0008045; GO:0004713; GO:0005886; GO:0004672; GO:0030424; GO:0042995; GO:0005524	transmembrane receptor protein tyrosine kinase activity; axon; perikaryon; cell projection; protein phosphorylation; transferase activity; peptidyl-tyrosine phosphorylation; phosphorylation; motor neuron axon guidance; protein kinase activity; kinase activity; protein tyrosine kinase activity; ATP binding; membrane; interneuron axon guidance; nucleotide binding; nervous system development; integr…	protein_coding
WBGene00018024	F35A5.1	X:3807465-3816434	N2	rnp-6	OK	1.12461	1.73549	0.62592	2.20151	0.0002	0.00250605	yes	GO:0005883; GO:0061564	neurofilament; axon development	protein_coding
WBGene00003007	lin-18	X:3958496-3961906	N2	rnp-6	OK	3.57359	2.19605	-0.702466	-2.05264	0.0004	0.00457121	yes	GO:0048560; GO:0016021; GO:1905491; GO:1904937; GO:0005737; GO:0002009; GO:0009949; GO:0010085; GO:0016020; GO:0040028; GO:0000166; GO:0004672; GO:0005524; GO:0006468; GO:1905488; GO:1905485; GO:0009786; GO:0005886; GO:0040035; GO:0045167; GO:0007399; GO:0016055; GO:0005634	plasma membrane; positive regulation of motor neuron migration; sensory neuron migration; cytoplasm; asymmetric protein localization involved in cell fate determination; nucleotide binding; positive regulation of anterior/posterior axon guidance; hermaphrodite genitalia development; establishment of anatomical structure orientation; positive regulation of sensory neuron axon guidance; regulation …	protein_coding
WBGene00201370	C07A12.14	X:4554288-4554582	N2	rnp-6	OK	1.06141	0	-inf		0.0001	0.00135972	yes
WBGene00001821	ham-2	X:4554690-4559386	N2	rnp-6	OK	3.925	2.51084	-0.644521	-1.72632	0.00305	0.0238181	yes	GO:0045664; GO:0003700; GO:0005634; GO:0001709; GO:0006355; GO:0003676; GO:0016477	nucleic acid binding; cell migration; regulation of neuron differentiation; cell fate determination; regulation of transcription, DNA-templated; nucleus; DNA binding transcription factor activity	protein_coding
WBGene00016705	C46C11.2	X:4632359-4635784	N2	rnp-6	OK	5.54261	3.29648	-0.749639	-2.29853	5e-05	0.000725861	yes	GO:0016021; GO:0016020; GO:0055085	transmembrane transport; integral component of membrane; membrane	protein_coding
WBGene00016704	hosl-1	X:4637334-4643625	N2	rnp-6	OK	5.76311	7.76819	0.43073	1.75791	0.00245	0.0200889	yes	GO:0016787; GO:0008203; GO:0016298; GO:0008152; GO:0016042	metabolic process; hydrolase activity; lipid catabolic process; cholesterol metabolic process; lipase activity	protein_coding
[truncated: 279 more rows]
