# Supplementary material for: Evolutionarily conserved regulation of immunity by the splicing factor RNP-6/PUF60
Source: eLife. 2020 Jun 15;9:e57591. doi: 10.7554/eLife.57591 (PMC7332298; doi:10.7554/eLife.57591)
Supplement: Figure 2—source data 3. [file elife-57591-fig2-data3.xlsx]

## Sheet: infection induced 
Gene stable ID	Gene name
WBGene00000211	asm-1
WBGene00000372	cyp-13A7
WBGene00000558	cnc-4
WBGene00000789	cpz-2
WBGene00000981	dhs-18
WBGene00001105	dsl-3
WBGene00001391	far-7
WBGene00001493	frm-7
WBGene00001577	gem-4
WBGene00001591	glc-1
WBGene00001819	haf-9
WBGene00001906	his-32
WBGene00001908	his-34
WBGene00001923	his-49
WBGene00001925	his-51
WBGene00001926	his-52
WBGene00001927	his-53
WBGene00001939	his-65
WBGene00002016	hsp-16.2
WBGene00002018	hsp-16.41
WBGene00002026	hsp-70
WBGene00003766	nlp-28
WBGene00003768	nlp-30
WBGene00003828	nuc-1
WBGene00003878	pept-3
WBGene00004727	sax-1
WBGene00004779	ser-4
WBGene00004993	spp-8
WBGene00005228	srh-2
WBGene00006681	twk-29
WBGene00007365	C06B3.6
WBGene00007409	C07B5.4
WBGene00007682	C18D11.6
WBGene00007725	C25F9.5
WBGene00007766	C27C7.1
WBGene00007919	cup-16
WBGene00008425	D2045.8
WBGene00008485	ugt-43
WBGene00009008	F21D5.3
WBGene00009226	cyp-37B1
WBGene00009692	F44E5.5
WBGene00009773	lipl-2
WBGene00009785	F46C5.10
WBGene00009805	F47B8.4
WBGene00009899	efl-3
WBGene00009957	F53B2.8
WBGene00010174	F56H9.2
WBGene00010422	H32K16.2
WBGene00010545	cbp-2
WBGene00010717	K09C8.7
WBGene00010822	M01G12.9
WBGene00010837	M03B6.5
WBGene00011213	R10E8.8
WBGene00011423	ipla-7
WBGene00011596	T07G12.5
WBGene00011727	T12A7.6
WBGene00011951	T23F6.3
WBGene00012420	Y7A9D.1
WBGene00012443	Y15E3A.4
WBGene00012750	faah-6
WBGene00012778	Y42A5A.3
WBGene00012819	Y43F8B.9
WBGene00013008	clec-146
WBGene00013145	cutl-2
WBGene00013694	Y106G6A.1
WBGene00015048	faah-2
WBGene00015350	fbxl-1
WBGene00015388	C03F11.2
WBGene00015392	nspc-7
WBGene00015597	fbxa-162
WBGene00016061	hpo-15
WBGene00016669	ilys-2
WBGene00016670	ilys-3
WBGene00016883	C52E2.4
WBGene00017340	F10D7.3
WBGene00017361	F10E9.12
WBGene00017582	F18G5.6
WBGene00017816	hrpk-1
WBGene00017964	F31F7.1
WBGene00018044	F35D11.3
WBGene00018731	F53A9.8
WBGene00018803	fbxa-24
WBGene00019068	faah-3
WBGene00019187	H11E01.2
WBGene00019376	lipl-4
WBGene00019409	K05F1.8
WBGene00019788	M116.1
WBGene00019902	R05G6.10
WBGene00020256	T05C3.6
WBGene00020446	T12B3.3
WBGene00020672	T22B7.3
WBGene00021167	cyp-32B1
WBGene00021852	Y54F10AM.8
WBGene00021977	Y58A7A.3
WBGene00022181	pho-9
WBGene00022200	fard-1
WBGene00022326	fbxa-14
WBGene00022781	pmt-1
WBGene00022893	ZK1290.13
WBGene00023501	F11E6.11
WBGene00043279	F22D6.8
WBGene00044078	tag-243
WBGene00044455	F23F12.13
WBGene00044478	K06B9.6
WBGene00044728	Y53F4B.45
WBGene00044807	T19H5.6
WBGene00045175	C10C6.9
WBGene00077490	M03A1.8
WBGene00077757	E02H4.7
WBGene00195005	ZK809.10
WBGene00201370	C07A12.14
WBGene00206419	R106.5
WBGene00219801	C05E4.16
WBGene00219860	C51F7.4
WBGene00220048	R106.6
WBGene00220051	R160.11
