# Supplementary material for: Evolutionarily conserved regulation of immunity by the splicing factor RNP-6/PUF60
Source: eLife. 2020 Jun 15;9:e57591. doi: 10.7554/eLife.57591 (PMC7332298; doi:10.7554/eLife.57591)
Supplement: Figure 2—source data 4. [file elife-57591-fig2-data4.xlsx]

## Sheet: infection repressed
Gene stable ID	Gene name
WBGene00000083	adt-2
WBGene00000175	aqp-7
WBGene00000373	cyp-14A5
WBGene00000656	col-80
WBGene00000671	col-96
WBGene00000673	col-98
WBGene00000675	col-101
WBGene00000677	col-103
WBGene00000699	col-125
WBGene00000708	col-135
WBGene00000716	col-143
WBGene00000733	col-160
WBGene00000768	cor-1
WBGene00000779	cpn-3
WBGene00000977	dhs-14
WBGene00001000	dim-1
WBGene00001116	dyc-1
WBGene00001244	elo-6
WBGene00001385	far-1
WBGene00001387	far-3
WBGene00001397	fat-5
WBGene00001398	fat-6
WBGene00001399	fat-7
WBGene00001468	flr-4
WBGene00001581	gfi-1
WBGene00001650	gon-1
WBGene00001725	grl-16
WBGene00002268	lec-5
WBGene00003055	lon-1
WBGene00003090	lys-1
WBGene00003169	mec-5
WBGene00003175	mec-12
WBGene00003369	mlc-1
WBGene00003511	mxl-3
WBGene00003573	ncx-8
WBGene00003602	nhr-3
WBGene00003652	nhr-62
WBGene00003658	nhr-68
WBGene00003891	osm-11
WBGene00003893	ost-1
WBGene00003934	pat-10
WBGene00003959	pcp-4
WBGene00004062	pmp-5
WBGene00004172	pqn-92
WBGene00004513	rrn-1.2
WBGene00004997	spp-12
WBGene00005644	srp-3
WBGene00005655	srr-4
WBGene00006404	tag-10
WBGene00006408	tag-18
WBGene00006418	spl-2
WBGene00006764	unc-27
WBGene00006801	unc-68
WBGene00006876	vab-10
WBGene00006928	vit-4
WBGene00006938	wee-1.1
WBGene00007660	pals-6
WBGene00007687	C18E9.7
WBGene00007964	cyp-25A2
WBGene00008032	C39E9.8
WBGene00008205	sams-1
WBGene00008393	D1086.6
WBGene00008436	DH11.2
WBGene00008566	acox-1.3
WBGene00008567	acox-1.4
WBGene00008575	scl-24
WBGene00008602	oac-14
WBGene00008629	cpt-5
WBGene00008741	F13D12.6
WBGene00008803	lips-10
WBGene00008824	F14H3.5
WBGene00009048	cth-1
WBGene00009237	F28H7.3
WBGene00009628	tatn-1
WBGene00009645	F42G10.1
WBGene00009812	suca-1
WBGene00009982	F53F1.4
WBGene00010066	F54F7.6
WBGene00010085	F55B11.3
WBGene00010256	hrg-3
WBGene00010426	H37A05.2
WBGene00010593	gsnl-1
WBGene00010646	K08C7.1
WBGene00010959	nduo-1
WBGene00010960	atp-6
WBGene00010988	metr-1
WBGene00011006	ugt-47
WBGene00011474	aldo-1
WBGene00011487	T05E12.6
WBGene00011713	T11F9.12
WBGene00011831	T19B10.2
WBGene00012163	VZK822L.2
WBGene00012247	W04E12.2
WBGene00012253	clec-50
WBGene00012382	ttr-16
WBGene00012538	Y37A1B.5
WBGene00012583	clec-4
WBGene00012757	Y41C4A.11
WBGene00013227	Y56A3A.6
WBGene00013293	Y57G11A.5
WBGene00013489	col-42
WBGene00014003	ZK593.3
WBGene00014254	cyp-13A10
WBGene00014666	C05D12.3
WBGene00014732	F09F3.8
WBGene00014941	Y67H2A.9
WBGene00015709	cyp-33A1
WBGene00015780	C14F11.4
WBGene00015791	C15C7.5
WBGene00015897	nhr-156
WBGene00015913	C17F4.7
WBGene00015956	C18B2.5
WBGene00016027	C23H5.8
WBGene00016095	C25E10.5
WBGene00016172	C27H5.2
WBGene00016759	C49A9.5
WBGene00016786	cyp-35A4
WBGene00016845	C50F7.5
WBGene00016892	pgph-3
WBGene00016943	acdh-1
WBGene00017060	D2063.1
WBGene00017065	D2092.4
WBGene00017681	slc-17.5
WBGene00017691	ilys-5
WBGene00017772	clec-1
WBGene00017892	F28B4.3
WBGene00017969	F32A5.3
WBGene00018138	folt-2
WBGene00018293	F41E6.12
WBGene00018353	fbxa-182
WBGene00018701	pccb-1
WBGene00018707	oac-31
WBGene00018885	drd-5
WBGene00018910	F56A4.2
WBGene00019105	asp-8
WBGene00019489	K07E1.1
WBGene00019540	K08D12.6
WBGene00019727	zig-12
WBGene00019738	clec-265
WBGene00020128	R193.2
WBGene00020237	phat-4
WBGene00020836	lgc-34
WBGene00020886	ttr-6
WBGene00020891	T28C12.4
WBGene00021448	Y39D8A.1
WBGene00021625	Y47D7A.13
WBGene00021779	Y51H7C.1
WBGene00021895	clec-84
WBGene00022610	ltah-1.2
WBGene00022645	ZK6.11
WBGene00044316	F41G3.21
WBGene00045416	Y37H2A.14
WBGene00047764	21ur-975
WBGene00049765	21ur-4346
WBGene00171449	21ur-10648
WBGene00173414	21ur-13288
WBGene00195050	T22D1.17
WBGene00219215	F13B12.15
WBGene00235310	R02D1.2
