# Supplementary material for: Evolutionarily conserved regulation of immunity by the splicing factor RNP-6/PUF60
Source: eLife. 2020 Jun 15;9:e57591. doi: 10.7554/eLife.57591 (PMC7332298; doi:10.7554/eLife.57591)
Supplement: Figure 3—source data 2. [file elife-57591-fig3-data2.xlsx]

## Sheet: Sheet1
Gene stable ID	Gene name
WBGene00000201	arx-3
WBGene00000228	atn-1
WBGene00000383	cdc-14
WBGene00000408	cdk-7
WBGene00000410	cdk-9
WBGene00000415	ced-1
WBGene00000459	ceh-38
WBGene00000506	cic-1
WBGene00000528	clh-1
WBGene00000762	coq-2
WBGene00000793	crh-1
WBGene00000816	csn-4
WBGene00000876	cyl-1
WBGene00000898	daf-2
WBGene00000900	daf-4
WBGene00000928	dao-2
WBGene00000955	des-2
WBGene00000987	dhs-24
WBGene00001017	dnc-1
WBGene00001050	dom-3
WBGene00001101	dsh-1
WBGene00001132	alp-1
WBGene00001160	efk-1
WBGene00001177	egl-8
WBGene00001178	egl-9
WBGene00001330	eps-8
WBGene00001332	eri-1
WBGene00001340	etr-1
WBGene00001403	fbl-1
WBGene00001406	fce-2
WBGene00001485	fre-1
WBGene00001491	frm-4
WBGene00001496	frm-10
WBGene00001497	fars-1
WBGene00001559	gei-1
WBGene00001560	gei-3
WBGene00001561	gei-4
WBGene00001597	gld-3
WBGene00001660	gop-1
WBGene00001679	gpb-1
WBGene00001864	him-5
WBGene00001955	hlh-11
WBGene00002000	hrp-2
WBGene00002066	ifg-1
WBGene00002138	inx-16
WBGene00002143	inx-21
WBGene00002173	itr-1
WBGene00002174	itx-1
WBGene00002203	kin-20
WBGene00002217	klp-4
WBGene00002223	klp-12
WBGene00002251	lat-1
WBGene00002265	lec-2
WBGene00002272	lec-9
WBGene00002299	let-23
WBGene00003130	map-2
WBGene00003150	mbk-2
WBGene00003221	mes-3
WBGene00003404	mpz-1
WBGene00003476	mtm-3
WBGene00003478	mtm-6
WBGene00003516	nab-1
WBGene00003561	ncr-1
WBGene00003567	ncx-2
WBGene00003612	nhr-13
WBGene00003655	nhr-65
WBGene00003669	nhr-79
WBGene00003678	nhr-88
WBGene00003685	nhr-95
WBGene00003733	nhx-5
WBGene00003825	ntl-2
WBGene00003916	par-1
WBGene00003920	par-5
WBGene00003936	pat-12
WBGene00003954	pcm-1
WBGene00003986	mct-4
WBGene00004051	parg-1
WBGene00004053	tank-1
WBGene00004095	pqe-1
WBGene00004128	pqn-41
WBGene00004147	larp-5
WBGene00004152	pqn-70
WBGene00004179	prg-2
WBGene00004182	prk-1
WBGene00004206	pst-1
WBGene00004213	ptp-1
WBGene00004336	ret-1
WBGene00004343	rgr-1
WBGene00004367	ric-8
WBGene00004370	rig-3
WBGene00004373	rme-1
WBGene00004378	rme-8
WBGene00004390	rnp-7
WBGene00004403	rom-4
WBGene00004698	rsp-1
WBGene00004702	rsp-5
WBGene00004703	rsp-6
WBGene00004704	rsp-7
WBGene00004719	sad-1
WBGene00004739	scd-1
WBGene00004754	sec-23
WBGene00004760	sel-2
WBGene00004765	sel-8
WBGene00004782	set-2
WBGene00004783	seu-1
WBGene00004787	sft-1
WBGene00004855	sma-1
WBGene00004884	smg-6
WBGene00004890	smp-2
WBGene00004892	sms-1
WBGene00004905	snf-6
WBGene00004951	spc-1
WBGene00006063	sto-1
WBGene00006342	sup-37
WBGene00006359	swp-1
WBGene00006444	shn-1
WBGene00006579	tlk-1
WBGene00006594	tom-1
WBGene00006604	tra-1
WBGene00006650	tts-1
WBGene00006697	uaf-1
WBGene00006739	ulp-4
WBGene00006752	unc-13
WBGene00006755	unc-16
WBGene00006759	unc-22
WBGene00006767	unc-31
WBGene00006768	unc-32
WBGene00006776	unc-40
WBGene00006779	unc-43
WBGene00006780	unc-44
WBGene00006787	unc-52
WBGene00006801	unc-68
WBGene00006803	unc-70
WBGene00006814	unc-82
WBGene00006820	unc-89
WBGene00006863	gyg-1
WBGene00006868	vab-1
WBGene00006876	vab-10
WBGene00006937	wah-1
WBGene00006942	wrk-1
WBGene00006945	wars-1
WBGene00006958	wve-1
WBGene00006970	zag-1
WBGene00006974	zen-4
WBGene00006975	zfp-1
WBGene00006988	zyg-1
WBGene00006997	zyg-12
WBGene00007010	alx-1
WBGene00007024	plin-1
WBGene00007092	B0001.7
WBGene00007094	B0019.2
WBGene00007257	C01H6.8
WBGene00007284	C03H12.1
WBGene00007329	C05C10.2
WBGene00007433	swsn-7
WBGene00007505	pezo-1
WBGene00007533	cbl-1
WBGene00007534	fubl-1
WBGene00007585	C14C10.2
WBGene00007588	C14C10.5
WBGene00007690	sftd-3
WBGene00007703	gbf-1
WBGene00007860	rilp-1
WBGene00007914	mys-4
WBGene00007944	C34F6.10
WBGene00007975	gls-1
WBGene00007991	C37A5.7
WBGene00008120	C46F11.5
WBGene00008127	ddo-1
WBGene00008132	gale-1
WBGene00008133	efsc-1
WBGene00008145	set-5
WBGene00008311	rskn-2
WBGene00008320	slc-25A29
WBGene00008345	C56A3.6
WBGene00008362	cfim-2
WBGene00008368	D1053.3
WBGene00008430	hgap-2
WBGene00008441	usp-50
WBGene00008442	E01B7.2
WBGene00008534	F02H6.1
WBGene00008555	F07C6.4
WBGene00008629	cpt-5
WBGene00008765	ttx-7
WBGene00008767	F13G3.7
WBGene00008852	ubql-1
WBGene00008878	ppfr-1
WBGene00008925	F17H10.1
WBGene00009098	ehbp-1
WBGene00009120	F25H2.6
WBGene00009162	F26E4.7
WBGene00009220	F28D9.4
WBGene00009276	F30F8.9
WBGene00009354	ilkp-1
WBGene00009433	F35E12.9
WBGene00009532	ccch-1
WBGene00009580	xbx-6
WBGene00009724	F45D3.4
WBGene00009743	sptf-1
WBGene00009831	F47G9.4
WBGene00009887	glb-17
WBGene00009888	F49E2.5
WBGene00009920	abts-1
WBGene00009975	F53C11.5
WBGene00010150	F56D5.6
WBGene00010160	png-1
WBGene00010199	bet-2
WBGene00010260	ddx-17
WBGene00010288	F58H1.5
WBGene00010408	mboa-2
WBGene00010427	hpo-11
WBGene00010428	dcn-1
WBGene00010615	ate-1
WBGene00010681	mak-1
WBGene00010732	K10C3.5
WBGene00010736	istr-1
WBGene00010742	K10D6.2
WBGene00011044	R05H10.3
WBGene00011059	R06C1.4
WBGene00011143	rpap-2
WBGene00011209	R10E8.3
WBGene00011240	mask-1
WBGene00011299	ikke-1
WBGene00011522	srap-1
WBGene00011580	ddx-19
WBGene00011629	T08G11.1
WBGene00011688	T10C6.6
WBGene00011689	T10C6.7
WBGene00011691	T10C6.10
WBGene00011827	T19A6.1
WBGene00011857	coa-4
WBGene00011860	T20D3.8
WBGene00011904	hlb-1
WBGene00011935	scrm-1
WBGene00011972	T23G11.7
WBGene00012005	jun-1
WBGene00012128	nra-1
WBGene00012131	T28F3.5
WBGene00012306	W06F12.2
WBGene00012326	W07E11.1
WBGene00012347	W08G11.3
WBGene00012358	W09D6.5
WBGene00012365	W09G3.1
WBGene00012369	W09G3.6
WBGene00012381	Y2H9A.4
WBGene00012462	Y17G7B.8
WBGene00012471	Y17G7B.20
WBGene00012543	nkcc-1
WBGene00012562	Y37H2A.1
WBGene00012576	Y37H9A.1
WBGene00012578	Y37H9A.3
WBGene00012641	epg-6
WBGene00012658	Y39A1A.21
WBGene00012659	Y39A1A.22
WBGene00012678	zhp-4
WBGene00012756	Y41C4A.9
WBGene00012804	Y43F4B.7
WBGene00012906	Y46G5A.15
WBGene00012997	Y48C3A.18
WBGene00012998	Y48C3A.20
WBGene00013014	Y48E1C.1
WBGene00013038	ani-1
WBGene00013123	Y52B11A.3
WBGene00013232	faah-4
WBGene00013261	sinh-1
WBGene00013273	marc-5
WBGene00013273	marc-5
WBGene00013308	nuo-3
WBGene00013353	Y59A8B.21
WBGene00013365	Y60A3A.19
WBGene00013481	Y69H2.3
WBGene00013506	usp-3
WBGene00013529	Y73F8A.24
WBGene00013530	ntl-11
WBGene00013561	Y75B8A.31
WBGene00013587	Y80D3A.9
WBGene00013692	Y105E8B.7
WBGene00013695	epg-8
WBGene00013730	sql-1
WBGene00013789	Y116A8C.9
WBGene00013790	Y116A8C.10
WBGene00013878	atfs-1
WBGene00014017	ZK632.10
WBGene00014075	dhhc-4
WBGene00014080	atg-4.2
WBGene00014098	ogdh-2
WBGene00014118	ZK858.5
WBGene00014261	shk-1
WBGene00014294	C53C7.5
WBGene00014516	hpo-42
WBGene00014821	R10E8.7
WBGene00014826	R13H4.2
WBGene00015061	cpna-2
WBGene00015131	B0303.11
WBGene00015138	B0310.2
WBGene00015173	trpp-11
WBGene00015207	B0495.8
WBGene00015354	snet-1
WBGene00015407	C03H5.5
WBGene00015418	pac-1
WBGene00015430	C04E7.3
WBGene00015476	C05D9.9
WBGene00015555	ufl-1
WBGene00015561	C07A12.7
WBGene00015577	ugt-64
WBGene00015635	C09D4.4
WBGene00015735	pdfr-1
WBGene00015801	C15H9.5
WBGene00015817	C16A11.4
WBGene00015926	C17H11.6
WBGene00016002	C18H9.3
WBGene00016006	fln-2
WBGene00016027	C23H5.8
WBGene00016033	C24A3.2
WBGene00016045	spas-1
WBGene00016054	C24D10.2
WBGene00016159	C27A12.9
WBGene00016264	C30F12.5
WBGene00016269	C30G4.4
WBGene00016341	mtq-2
WBGene00016415	ampd-1
WBGene00016432	C35B1.2
WBGene00016500	memo-1
WBGene00016539	madd-2
WBGene00016588	hpo-12
WBGene00016603	met-1
WBGene00016792	C49H3.6
WBGene00016811	C50D2.8
WBGene00016905	ztf-3
WBGene00017001	D1007.3
WBGene00017012	acs-22
WBGene00017025	D1037.1
WBGene00017037	D1069.3
WBGene00017080	lec-12
WBGene00017093	E02C12.8
WBGene00017258	F08F1.4
WBGene00017275	F08F8.10
WBGene00017301	hach-1
WBGene00017369	F10G7.5
WBGene00017625	cgt-2
WBGene00017780	F25E2.2
WBGene00017816	hrpk-1
WBGene00017849	F27B3.7
WBGene00017934	F30B5.4
WBGene00018037	chtl-1
WBGene00018184	F38E9.1
WBGene00018226	F40B5.2
WBGene00018328	F42A6.6
WBGene00018364	dagl-2
WBGene00018374	tag-343
WBGene00018508	F46F11.1
WBGene00018509	xrep-4
WBGene00018585	F48A11.4
WBGene00018635	nprl-2
WBGene00018680	tsen-54
WBGene00018700	lmd-3
WBGene00018756	plpp-1.1
WBGene00018874	tag-234
WBGene00019077	zipt-11
WBGene00019127	cgt-3
WBGene00019130	gbas-1
WBGene00019170	H06I04.6
WBGene00019237	H24G06.1
WBGene00019278	K01A2.3
WBGene00019361	clik-3
WBGene00019457	vms-1
WBGene00019466	tos-1
WBGene00019606	clec-88
WBGene00019674	K12C11.3
WBGene00019697	M01B12.4
WBGene00019726	bris-1
WBGene00020094	wip-1
WBGene00020131	gcy-28
WBGene00020158	T02C5.1
WBGene00020172	thoc-1
WBGene00020284	mel-46
WBGene00020294	T06F4.1
WBGene00020296	rrp-8
WBGene00020346	rbm-5
WBGene00020399	ztf-4
WBGene00020403	hrde-4
WBGene00020496	spat-3
WBGene00020581	T19D12.6
WBGene00020682	T22D1.3
WBGene00020732	T23E7.2
WBGene00020786	T25B2.2
WBGene00020821	jhdm-1
WBGene00020824	T26A8.1
WBGene00020867	shc-2
WBGene00020952	kel-8
WBGene00020955	angl-1
WBGene00021009	afd-1
WBGene00021047	zfp-3
WBGene00021078	unc-132
WBGene00021294	Y25C1A.7
WBGene00021342	Y35H6.3
WBGene00021352	pcyt-2.1
WBGene00021365	smgl-2
WBGene00021425	ppgn-1
WBGene00021440	Y39A3CL.1
WBGene00021443	Y39A3CL.7
WBGene00021482	Y39H10A.6
WBGene00021515	set-23
WBGene00021531	Y42G9A.1
WBGene00021534	mvk-1
WBGene00021595	Y46E12BL.2
WBGene00021626	rft-2
WBGene00021755	hpo-38
WBGene00021765	Y51F10.4
WBGene00021820	nipa-1
WBGene00021868	atln-1
WBGene00021887	fbxc-45
WBGene00021899	Y54H5A.1
WBGene00021906	Y55B1AR.2
WBGene00021910	stim-1
WBGene00021932	cox-18
WBGene00021983	npr-5
WBGene00022010	catp-7
WBGene00022022	Y61A9LA.11
WBGene00022054	Y67D2.4
WBGene00022087	Y69A2AR.16
WBGene00022115	Y71F9AL.10
WBGene00022124	supr-1
WBGene00022134	hrpu-2
WBGene00022158	Y71G12B.23
WBGene00022174	Y71H2AM.9
WBGene00022301	cpsf-1
WBGene00022335	Y82E9BR.2
WBGene00022366	Y92H12BL.5
WBGene00022379	Y94H6A.7
WBGene00022453	ncap-1
WBGene00022489	Y119D3B.12
WBGene00022500	lfi-1
WBGene00022579	ZC262.2
WBGene00022592	klu-2
WBGene00022717	hipr-1
WBGene00022803	ZK688.9
WBGene00022823	ZK813.4
WBGene00022855	tcer-1
WBGene00023408	cex-2
WBGene00023414	R01H2.7
WBGene00023417	swm-1
WBGene00044065	tag-229
WBGene00044068	syd-9
WBGene00044073	tag-244
WBGene00044080	D1086.10
WBGene00044081	D1086.11
WBGene00044650	Y71G10AR.4
WBGene00044988	W01A8.8
WBGene00045366	Y17D7C.3
WBGene00045434	Y95D11A.3
WBGene00050885	Y94H6A.12
WBGene00194861	H04D03.6
WBGene00195183	R04A9.9
WBGene00219700	linc-6
WBGene00219959	F52D2.14
