# Supplementary material for: Evolutionarily conserved regulation of immunity by the splicing factor RNP-6/PUF60
Source: eLife. 2020 Jun 15;9:e57591. doi: 10.7554/eLife.57591 (PMC7332298; doi:10.7554/eLife.57591)
Supplement: Figure 3—source data 3. [file elife-57591-fig3-data3.xlsx]

## Sheet: Sheet1
Gene stable ID	Gene name
WBGene00000201	arx-3
WBGene00000383	cdc-14
WBGene00000876	cyl-1
WBGene00000955	des-2
WBGene00001160	efk-1
WBGene00001177	egl-8
WBGene00001330	eps-8
WBGene00001561	gei-4
WBGene00002223	klp-12
WBGene00002272	lec-9
WBGene00003130	map-2
WBGene00003476	mtm-3
WBGene00003567	ncx-2
WBGene00004053	tank-1
WBGene00004179	prg-2
WBGene00004373	rme-1
WBGene00004378	rme-8
WBGene00004703	rsp-6
WBGene00004951	spc-1
WBGene00006801	unc-68
WBGene00006863	gyg-1
WBGene00006974	zen-4
WBGene00008132	gale-1
WBGene00008430	hgap-2
WBGene00010150	F56D5.6
WBGene00011629	T08G11.1
WBGene00012326	W07E11.1
WBGene00012365	W09G3.1
WBGene00015801	C15H9.5
WBGene00016033	C24A3.2
WBGene00016415	ampd-1
WBGene00017025	D1037.1
WBGene00019361	clik-3
WBGene00019697	M01B12.4
WBGene00020131	gcy-28
WBGene00020284	mel-46
WBGene00021352	pcyt-2.1
WBGene00021887	fbxc-45
WBGene00022579	ZC262.2
WBGene00022855	tcer-1
WBGene00044073	tag-244
WBGene00219700	linc-6
WBGene00219959	F52D2.14
