# Supplementary material for: Evolutionarily conserved regulation of immunity by the splicing factor RNP-6/PUF60
Source: eLife. 2020 Jun 15;9:e57591. doi: 10.7554/eLife.57591 (PMC7332298; doi:10.7554/eLife.57591)
Supplement: Figure 5—source data 1. [file elife-57591-fig5-data1.xlsx]

## Sheet: Sheet1
Gene stable ID	Gene name
WBGene00000558	cnc-4
WBGene00001925	his-51
WBGene00001926	his-52
WBGene00001927	his-53
WBGene00001939	his-65
WBGene00003768	nlp-30
WBGene00008425	D2045.8
WBGene00008485	ugt-43
WBGene00009226	cyp-37B1
WBGene00009805	F47B8.4
WBGene00009899	efl-3
WBGene00009957	F53B2.8
WBGene00015048	faah-2
WBGene00019376	lipl-4
WBGene00020672	T22B7.3
WBGene00021977	Y58A7A.3
WBGene00077490	M03A1.8
