# Supplementary material for: Evolutionarily conserved regulation of immunity by the splicing factor RNP-6/PUF60
Source: eLife. 2020 Jun 15;9:e57591. doi: 10.7554/eLife.57591 (PMC7332298; doi:10.7554/eLife.57591)
Supplement: Figure 5—source data 2. [file elife-57591-fig5-data2.xlsx]

## Sheet: Sheet1
Gene stable ID	Gene name
WBGene00000083	adt-2
WBGene00000175	aqp-7
WBGene00000673	col-98
WBGene00000677	col-103
WBGene00000716	col-143
WBGene00000733	col-160
WBGene00000779	cpn-3
WBGene00000977	dhs-14
WBGene00001244	elo-6
WBGene00001385	far-1
WBGene00002268	lec-5
WBGene00003175	mec-12
WBGene00003369	mlc-1
WBGene00003511	mxl-3
WBGene00003652	nhr-62
WBGene00003891	osm-11
WBGene00003893	ost-1
WBGene00003934	pat-10
WBGene00004062	pmp-5
WBGene00005644	srp-3
WBGene00006408	tag-18
WBGene00006764	unc-27
WBGene00006876	vab-10
WBGene00008393	D1086.6
WBGene00008741	F13D12.6
WBGene00009237	F28H7.3
WBGene00009628	tatn-1
WBGene00009982	F53F1.4
WBGene00010085	F55B11.3
WBGene00010593	gsnl-1
WBGene00010959	nduo-1
WBGene00010960	atp-6
WBGene00011474	aldo-1
WBGene00011831	T19B10.2
WBGene00012253	clec-50
WBGene00012382	ttr-16
WBGene00012538	Y37A1B.5
WBGene00013489	col-42
WBGene00015791	C15C7.5
WBGene00016027	C23H5.8
WBGene00016759	C49A9.5
WBGene00017060	D2063.1
WBGene00017065	D2092.4
WBGene00017691	ilys-5
WBGene00017772	clec-1
WBGene00018701	pccb-1
WBGene00018885	drd-5
WBGene00019489	K07E1.1
WBGene00019540	K08D12.6
WBGene00020237	phat-4
WBGene00020836	lgc-34
WBGene00020891	T28C12.4
WBGene00021779	Y51H7C.1
WBGene00021895	clec-84
WBGene00045416	Y37H2A.14
