# Supplementary material for: Evolutionarily conserved regulation of immunity by the splicing factor RNP-6/PUF60
Source: eLife journal article supplement (doi:10.7554/elife.57591), 2020-06-15

A

# Alternative splicing events N2 *E. coli* vs N2 *S. aureus*

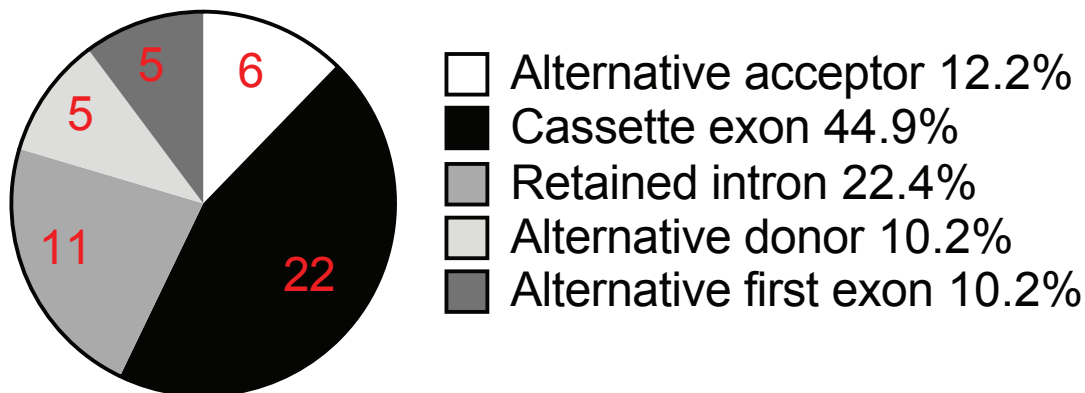

B

# Alternative splicing events *rnp-6(dh1127)* *S. aureus* vs N2 *S. aureus*

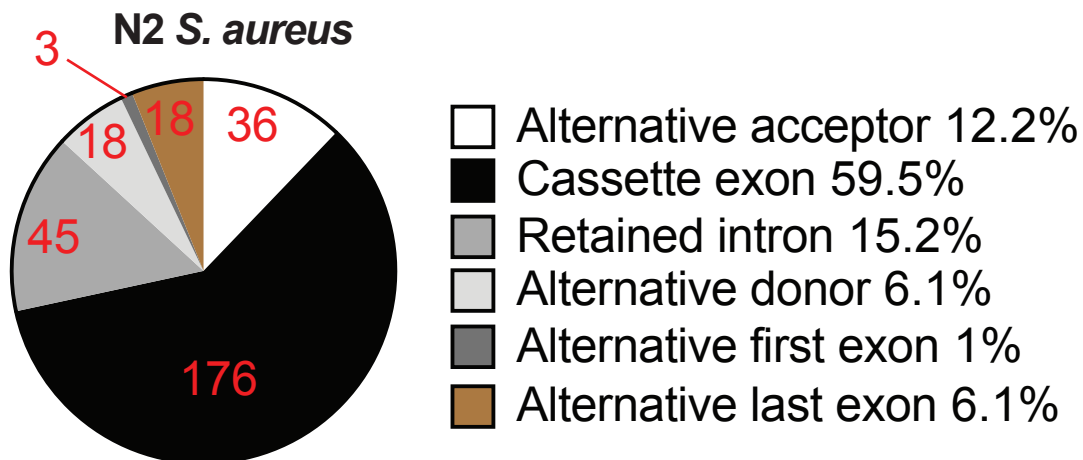

Supplement: supp [file elife_poa_e57591_Figure_3_figure_supplement_1.pdf › elife_poa_e57591_Figure_3_figure_supplement_1.pdf]
