# Supplementary figures and images for: Evolutionarily conserved regulation of immunity by the splicing factor RNP-6/PUF60
Source: eLife journal article supplement (doi:10.7554/elife.57591), 2020-06-15

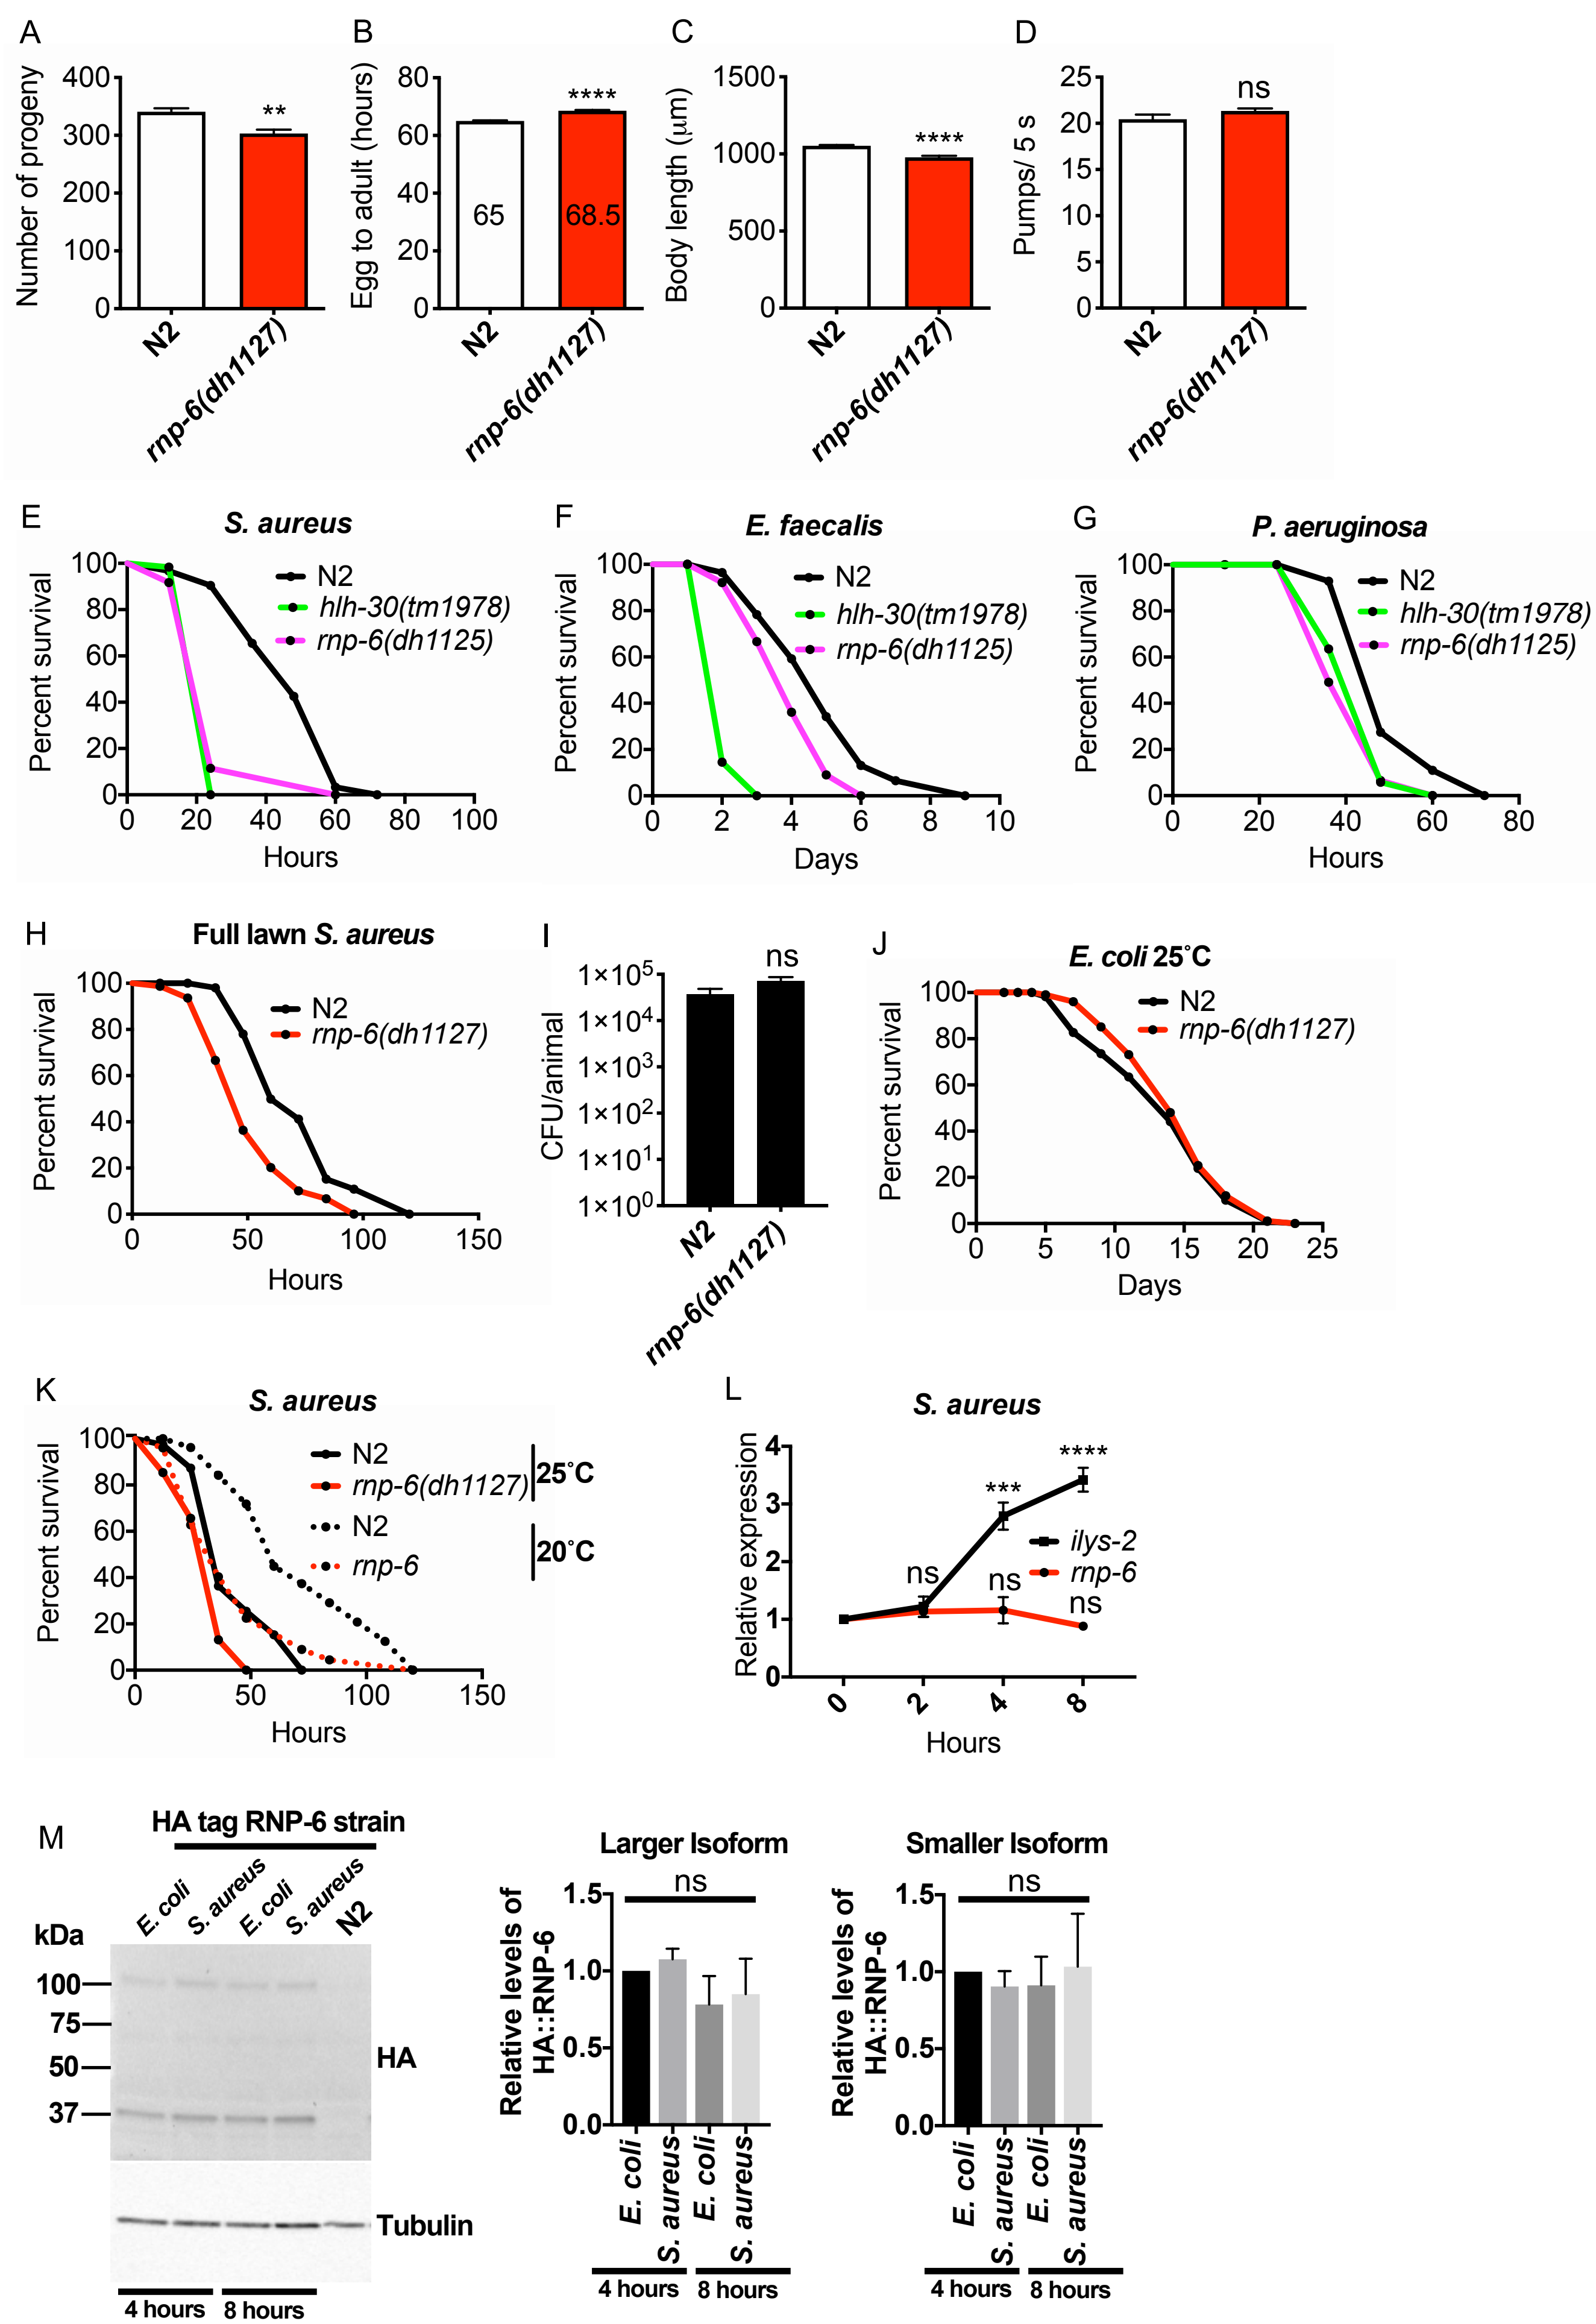

Supplement: supp [file elife_poa_e57591_Figure_1_figure_supplement_1.pdf › elife_poa_e57591_Figure_1_figure_supplement_1.pdf]

A

***rnp-6* dependent  
infection induced genes**

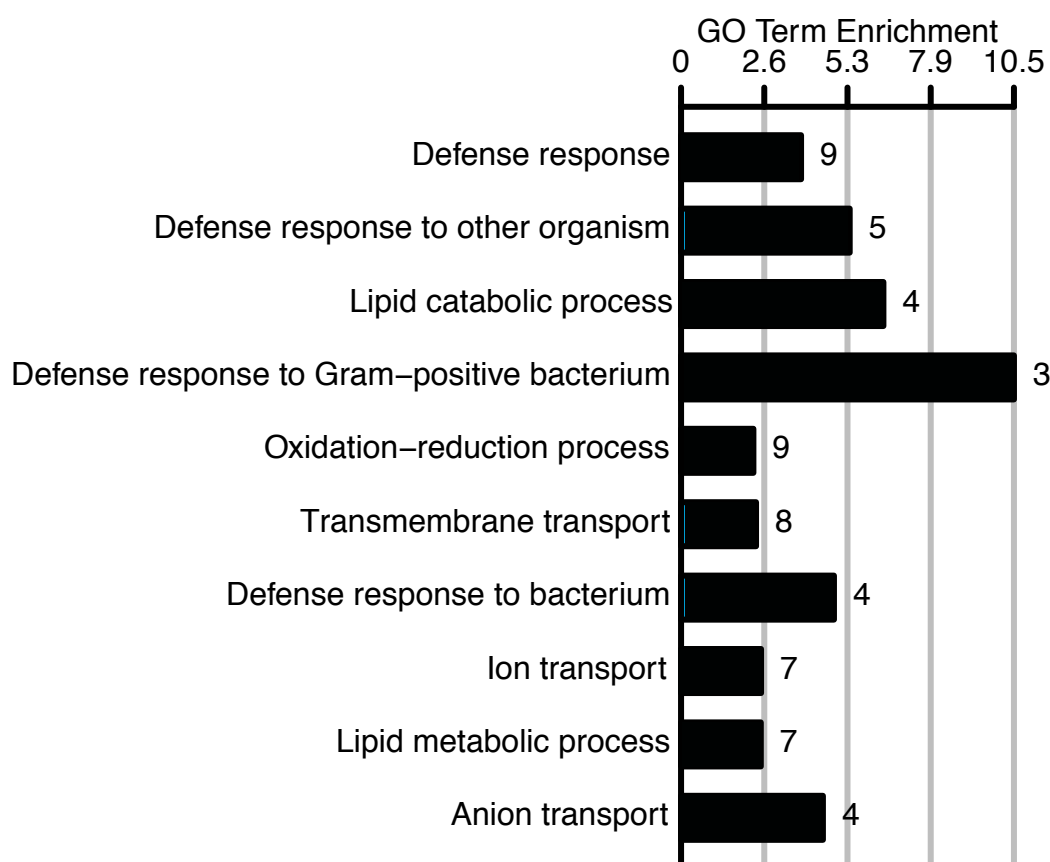

B

***rnp-6* dependent  
infection repressed genes**

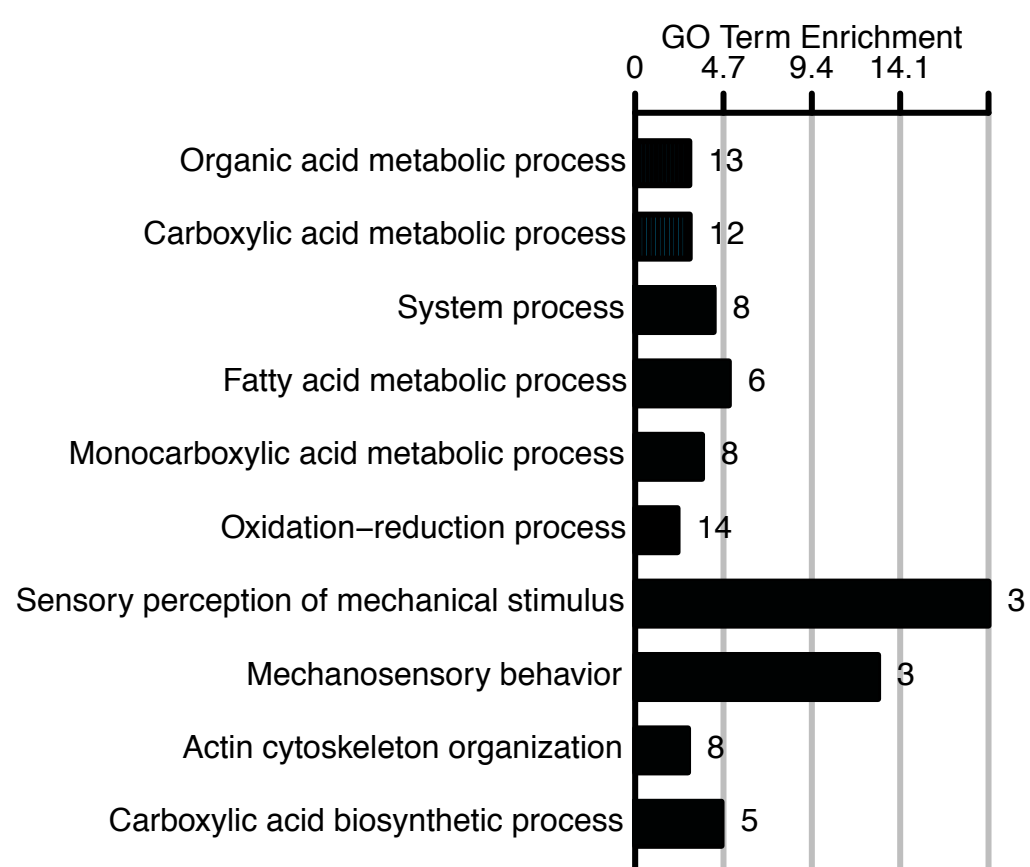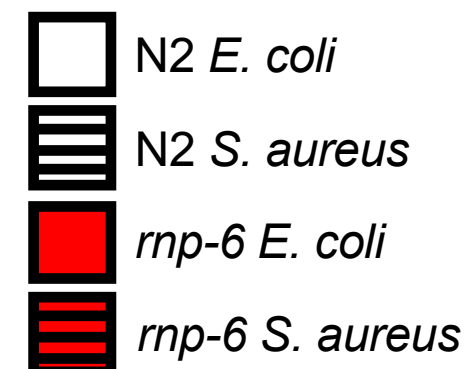

C

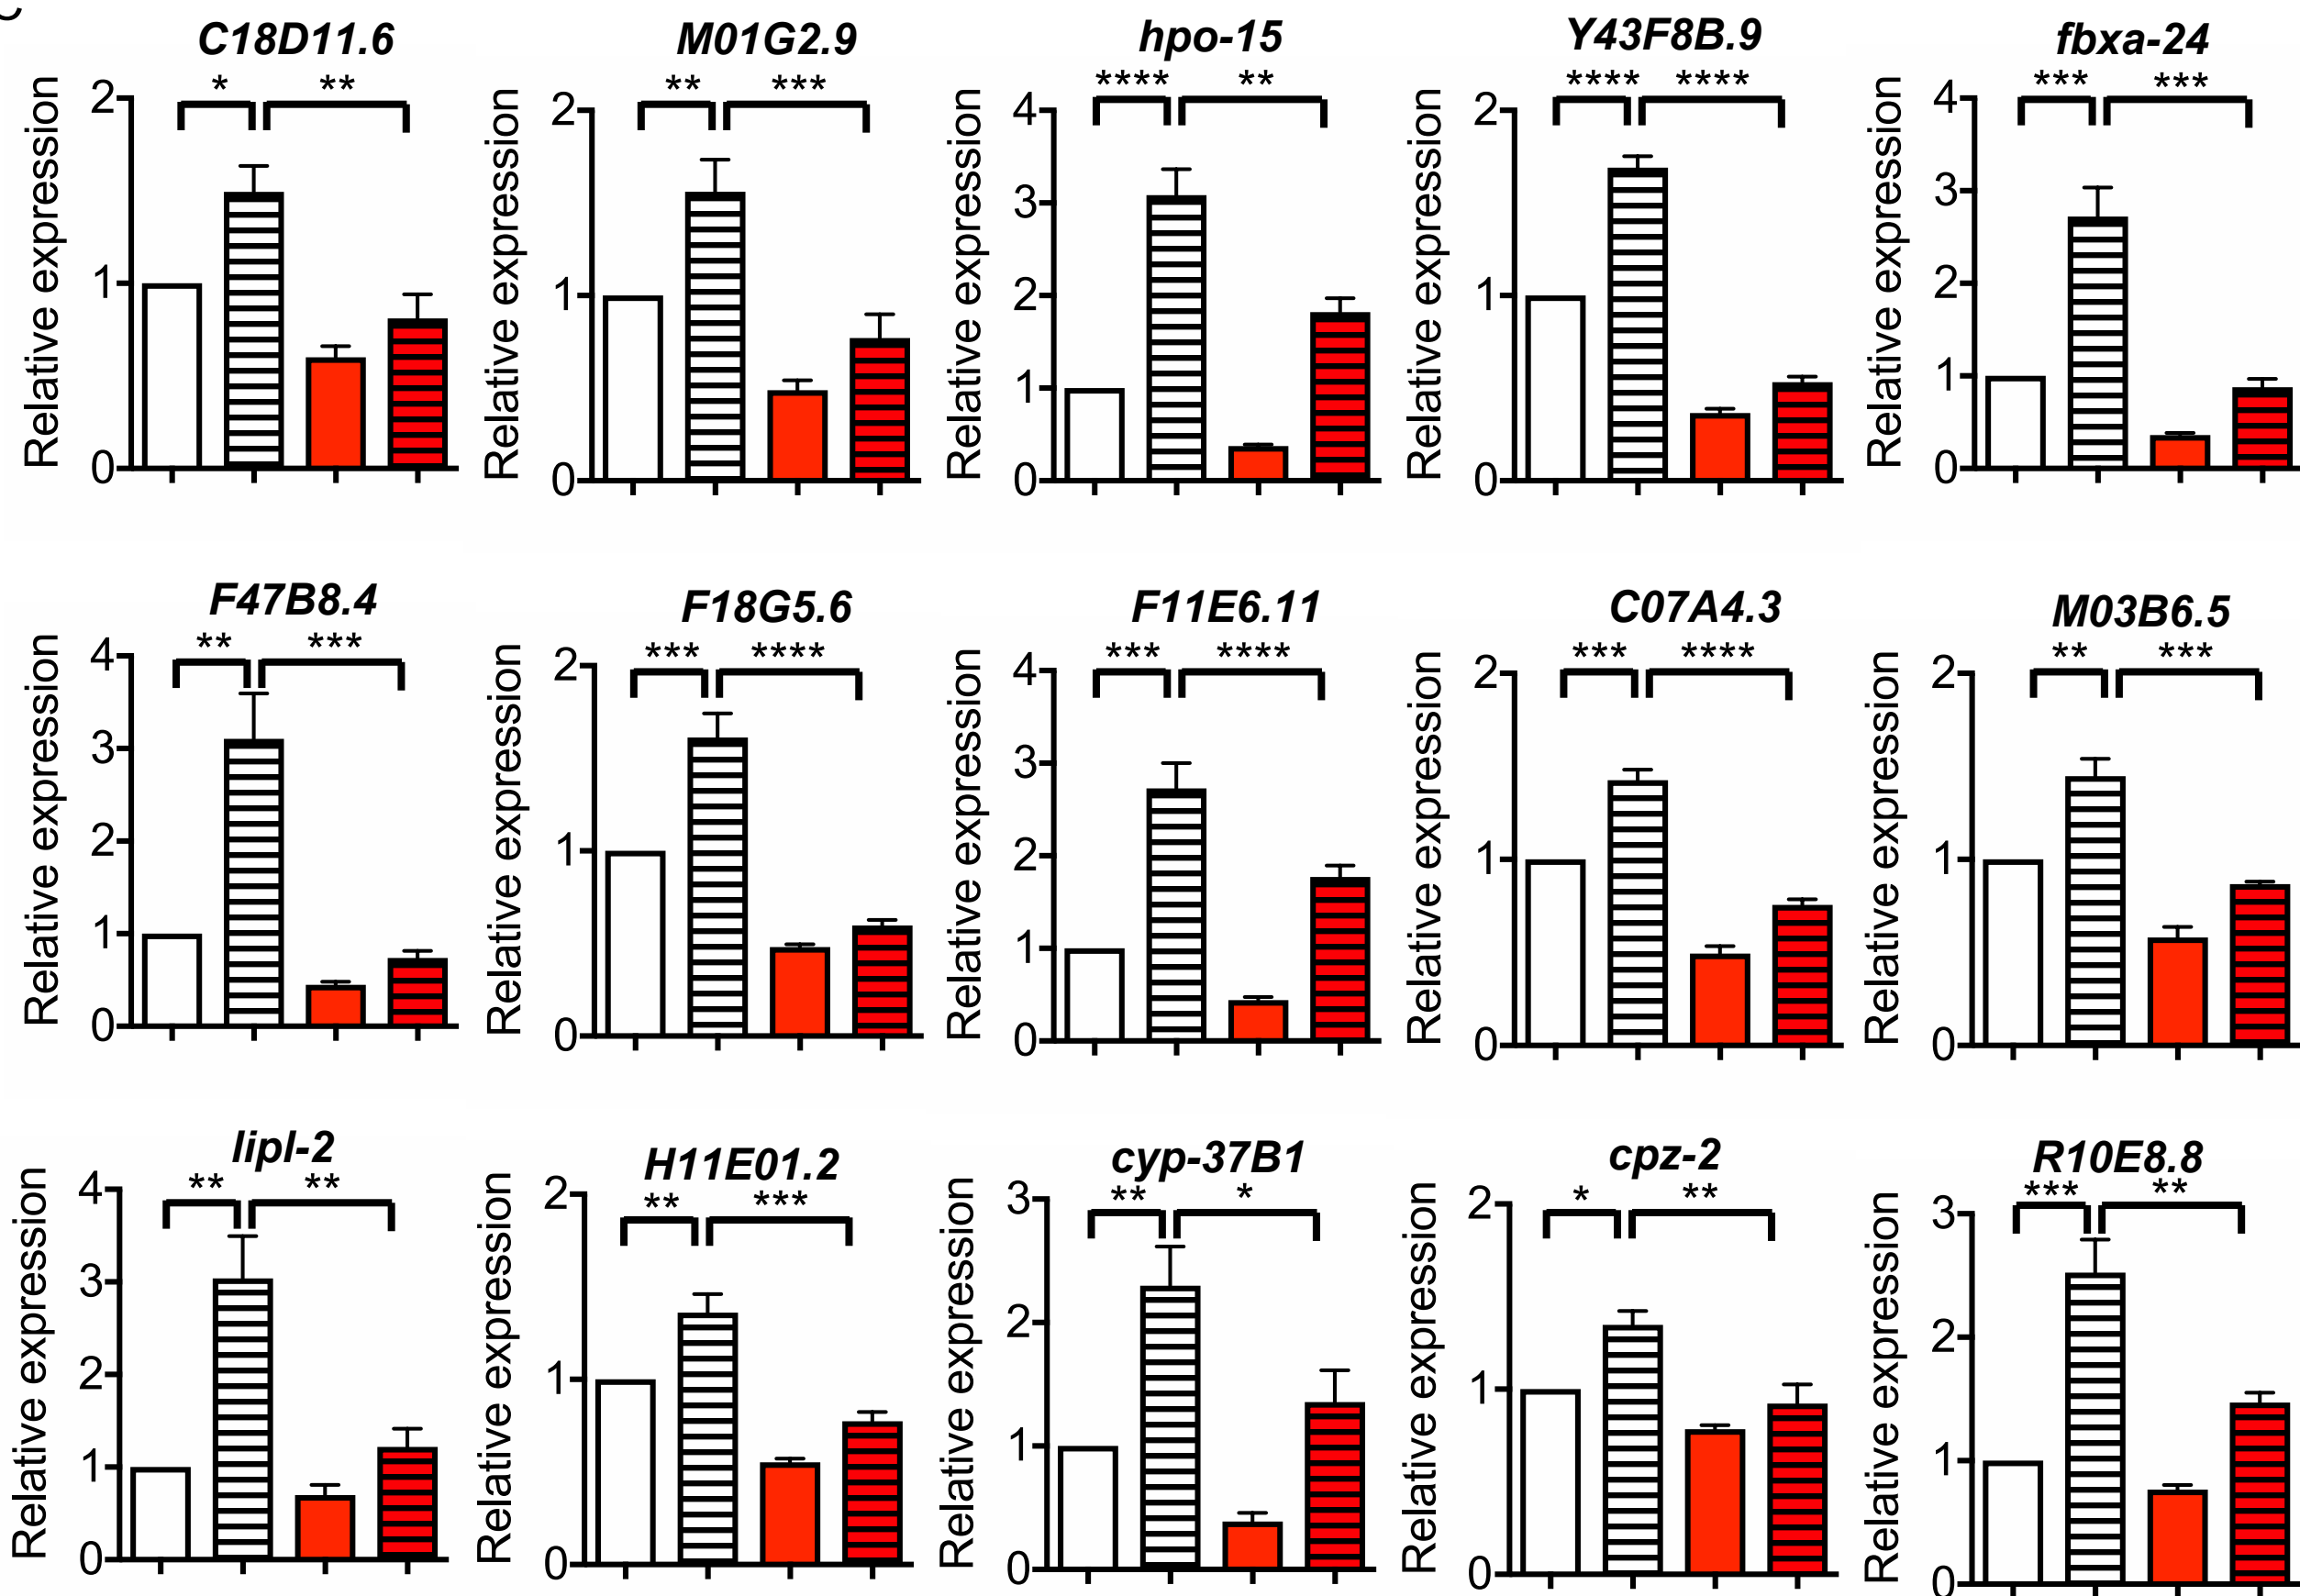

Supplement: supp [file elife_poa_e57591_Figure_2_figure_supplement_1.pdf › elife_poa_e57591_Figure_2_figure_supplement_1.pdf]

A

Full lawn *S. aureus*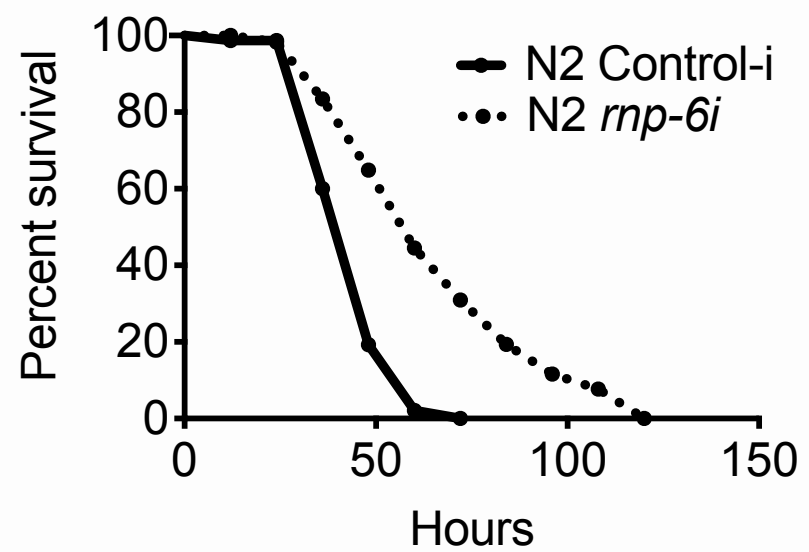

B

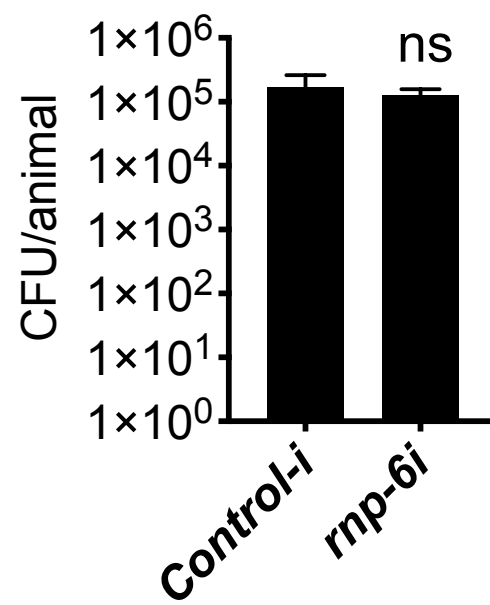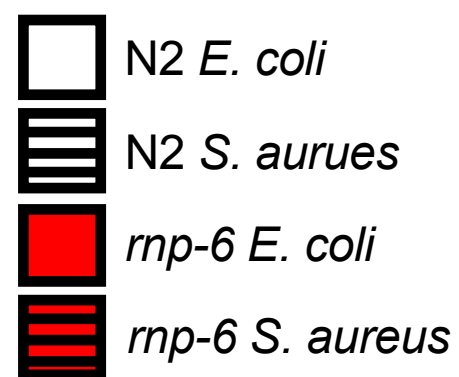

C

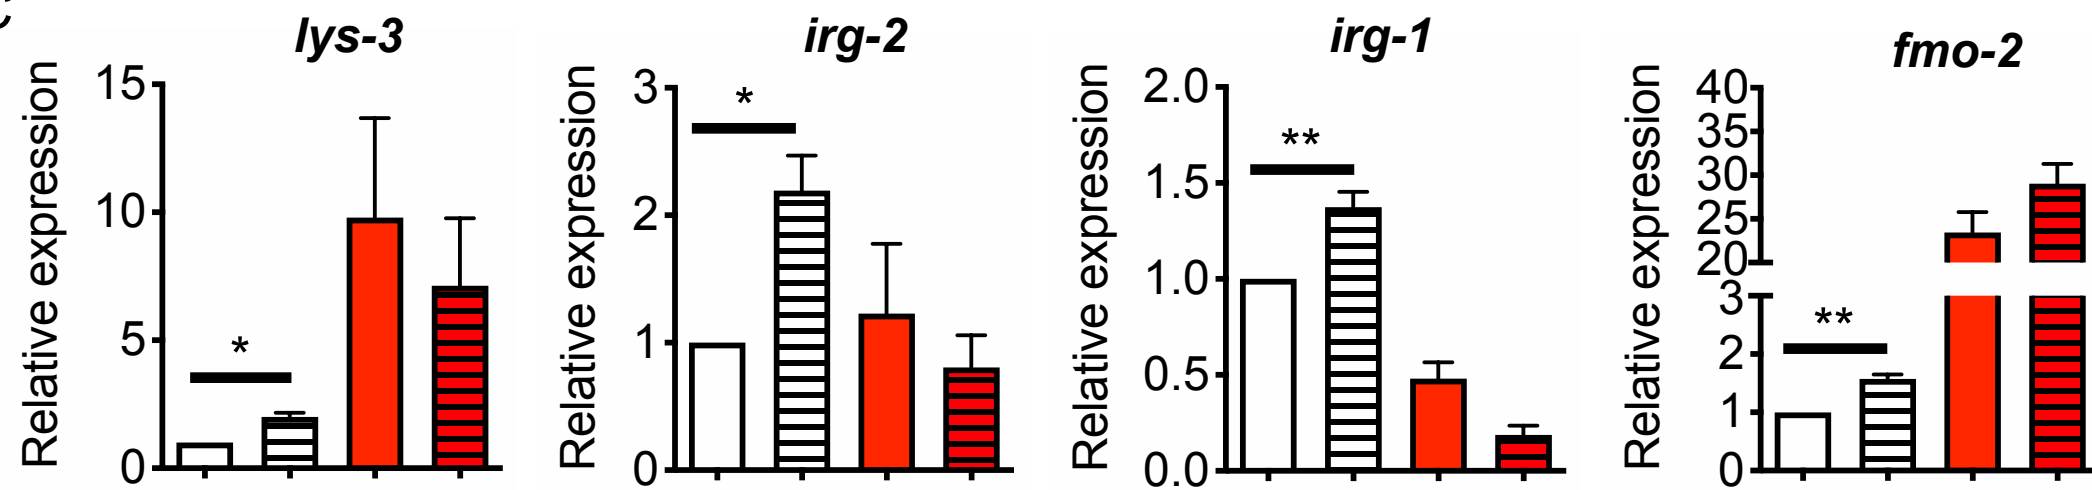

D

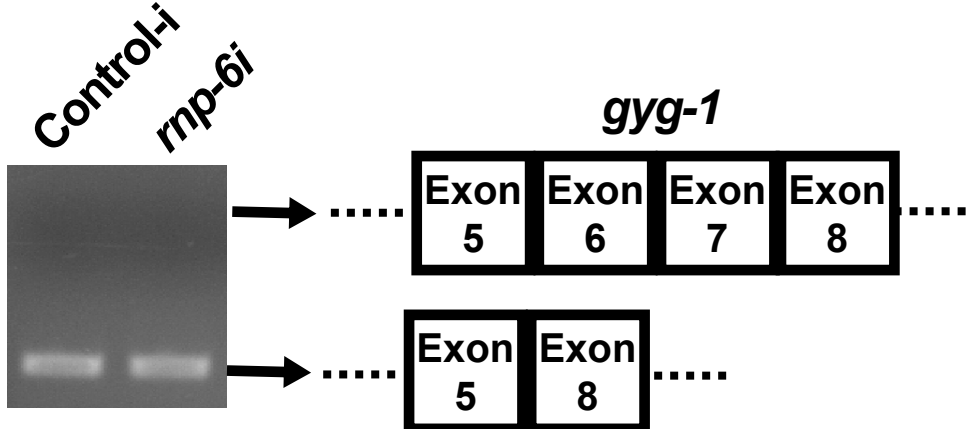

E

*E. faecalis*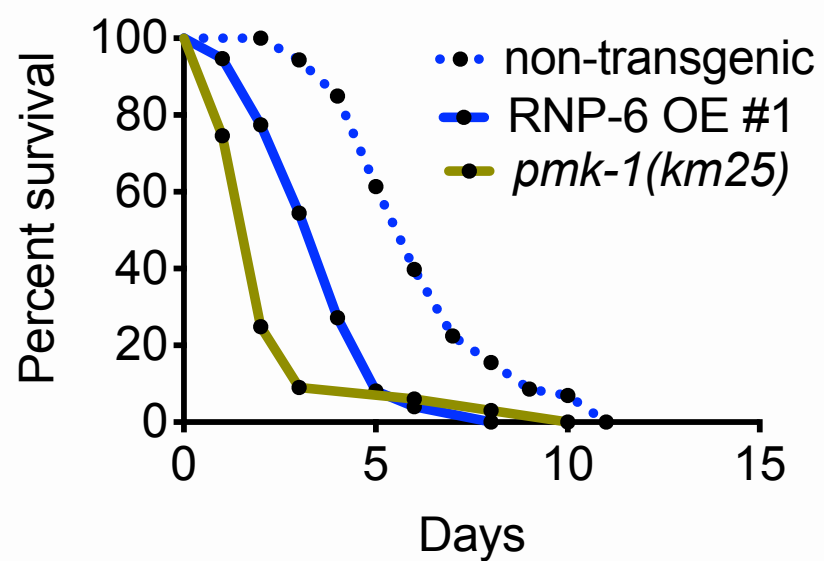

F

*E. faecalis*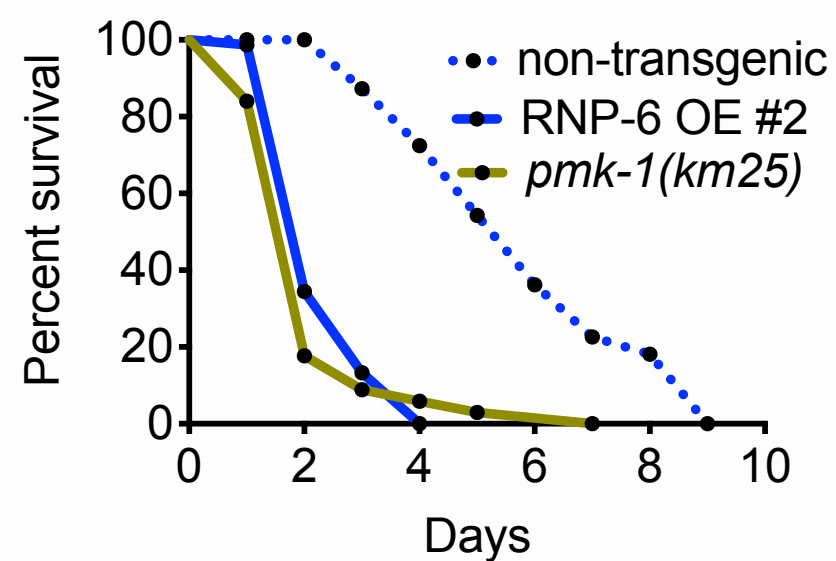

G

Full lawn *S. aureus*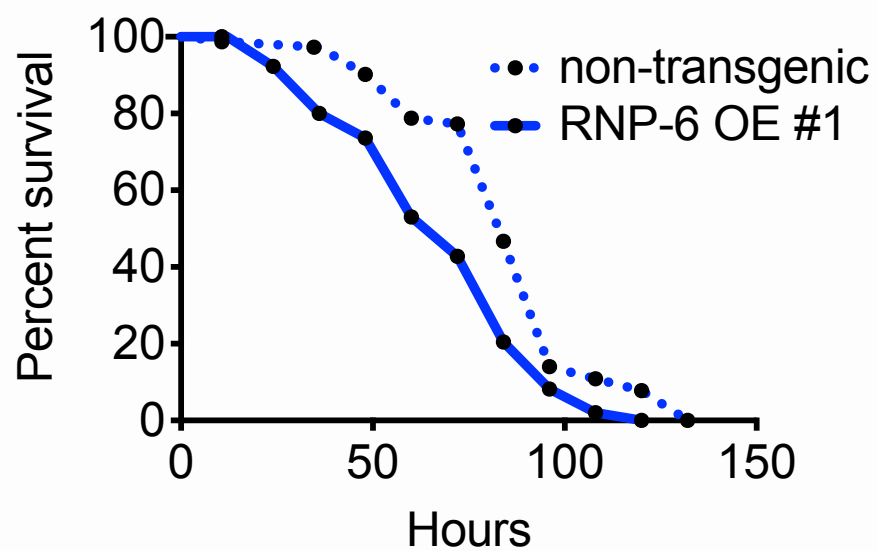

H

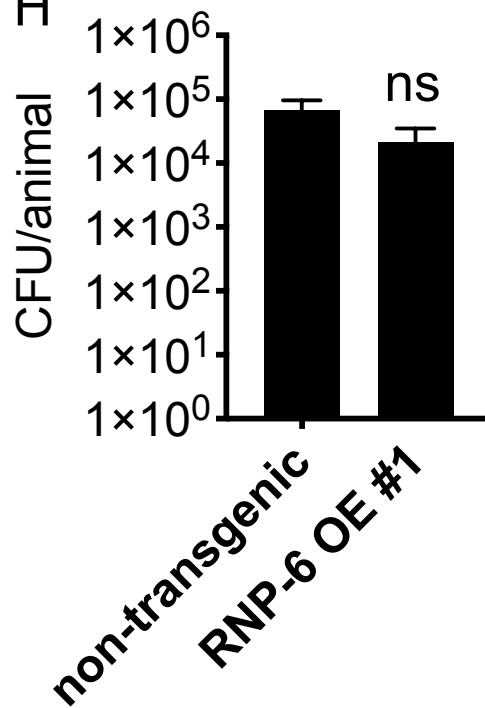

Supplement: supp [file elife_poa_e57591_Figure_4_figure_supplement_1.pdf › elife_poa_e57591_Figure_4_figure_supplement_1.pdf]

A

*S. aureus*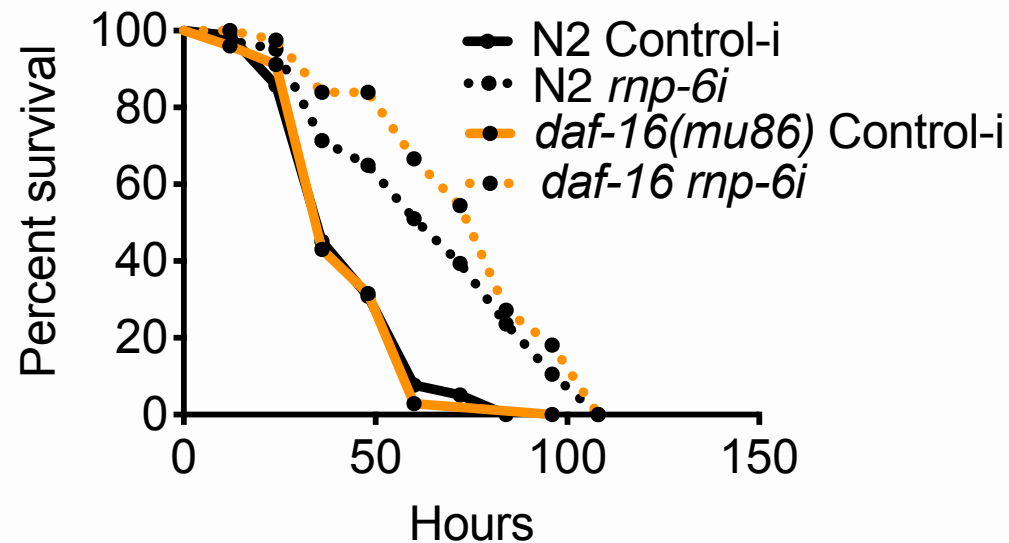

B

*S. aureus*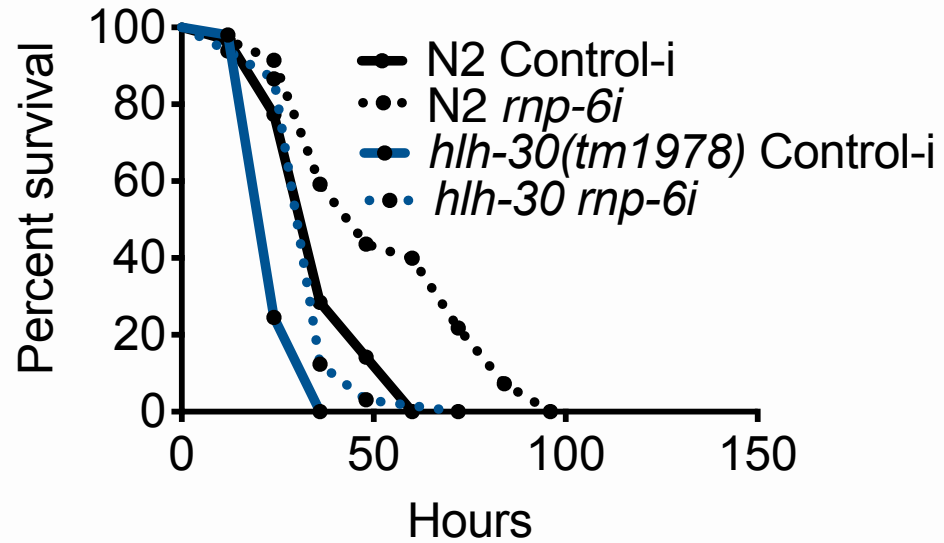

Supplement: supp [file elife_poa_e57591_Figure_5_figure_supplement_1.pdf › elife_poa_e57591_Figure_5_figure_supplement_1.pdf]

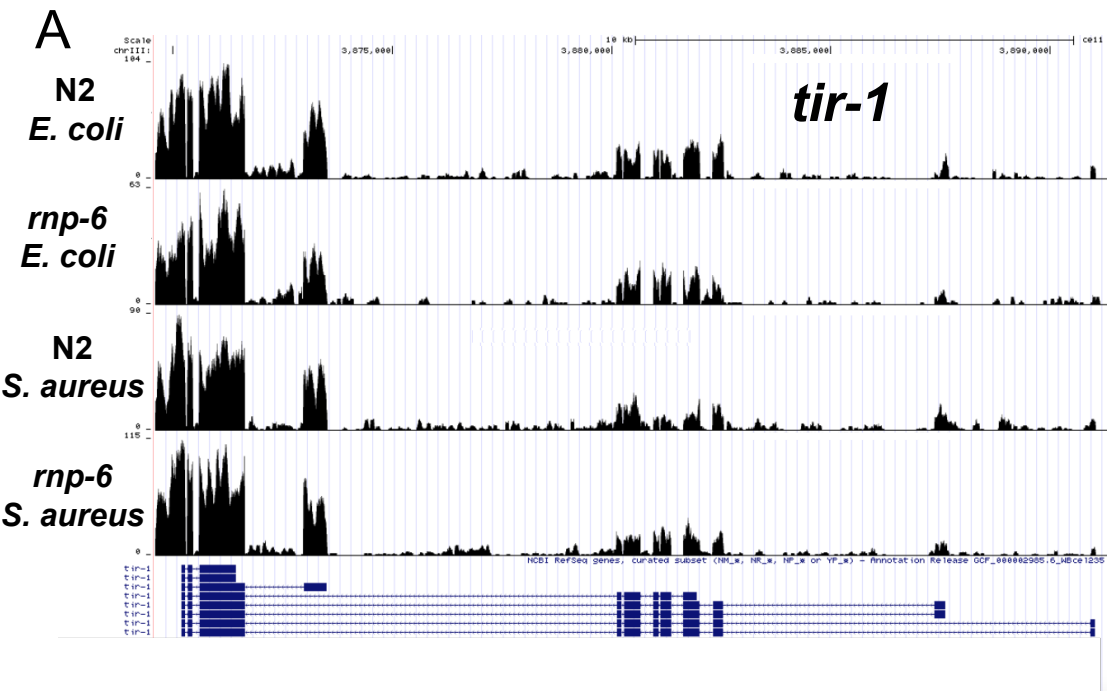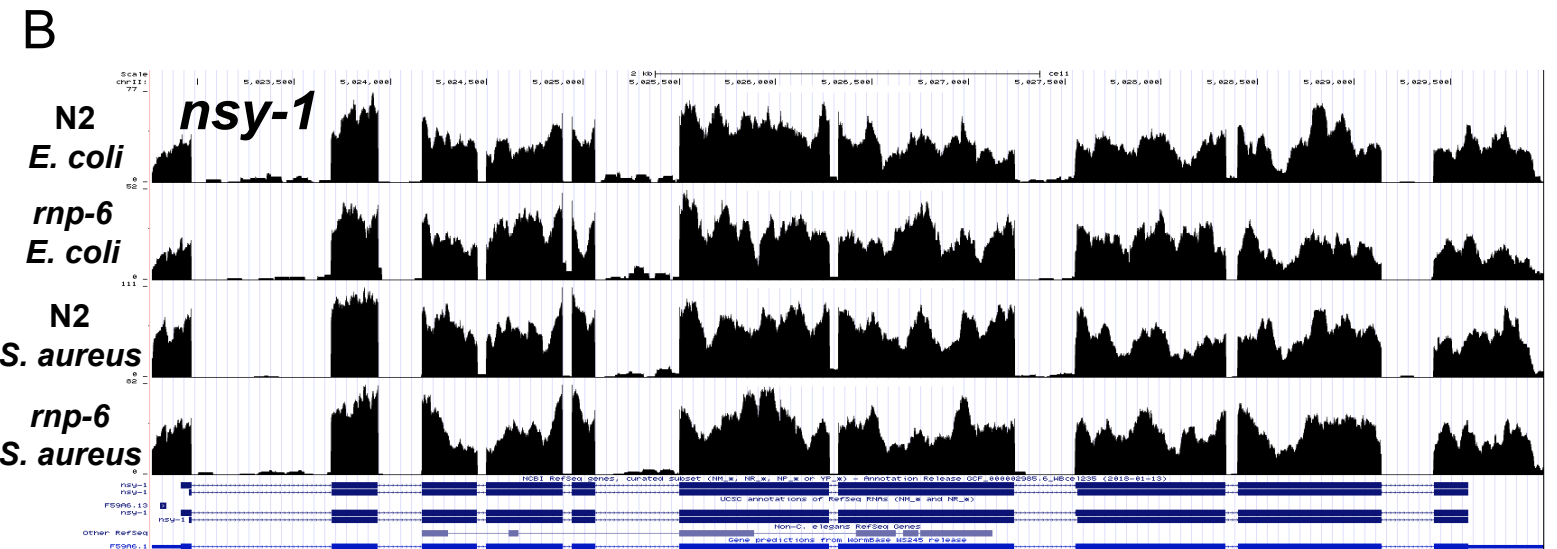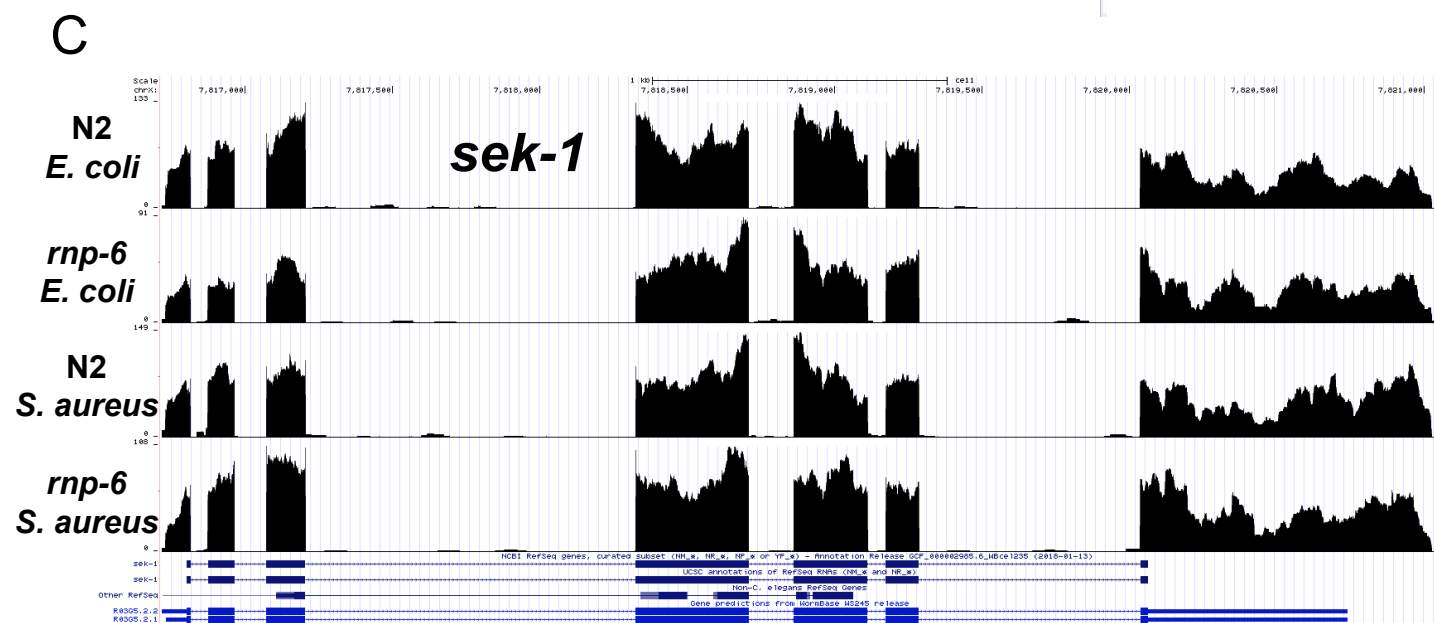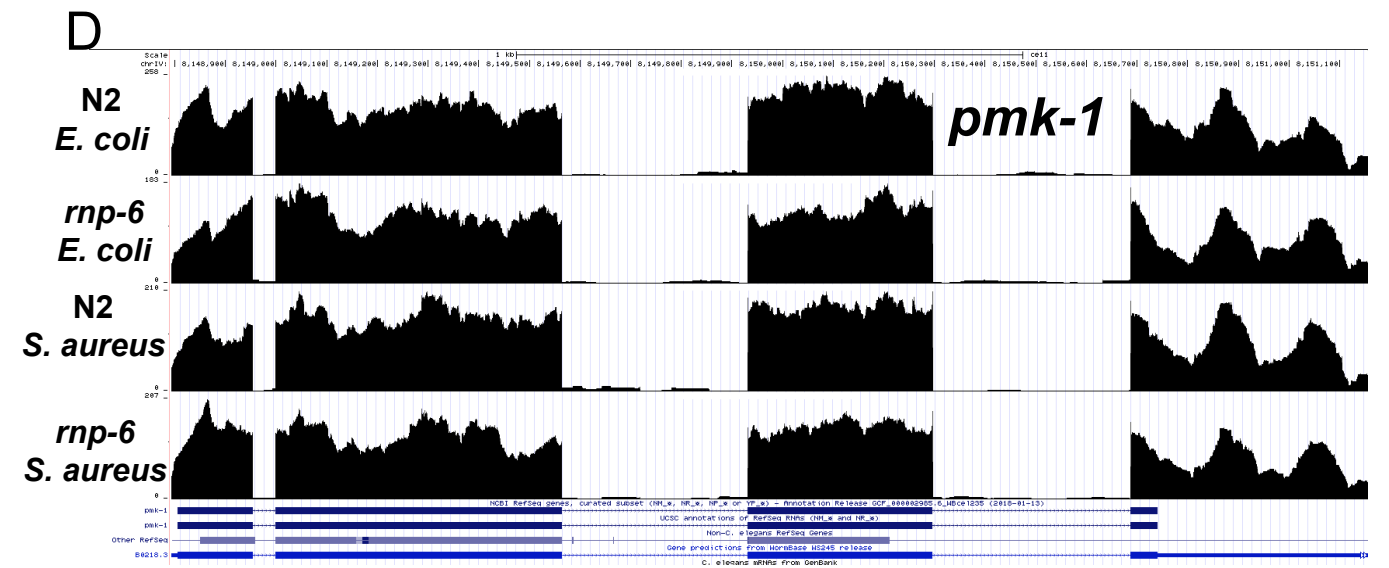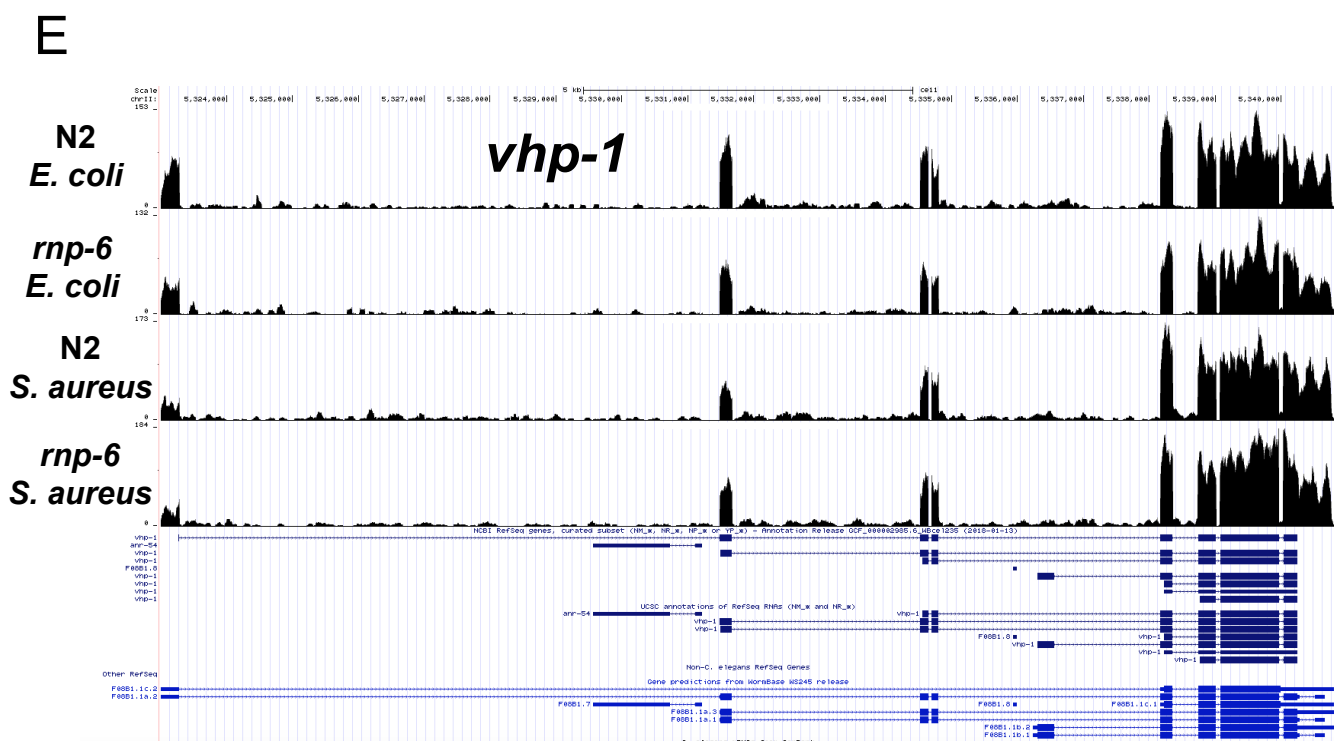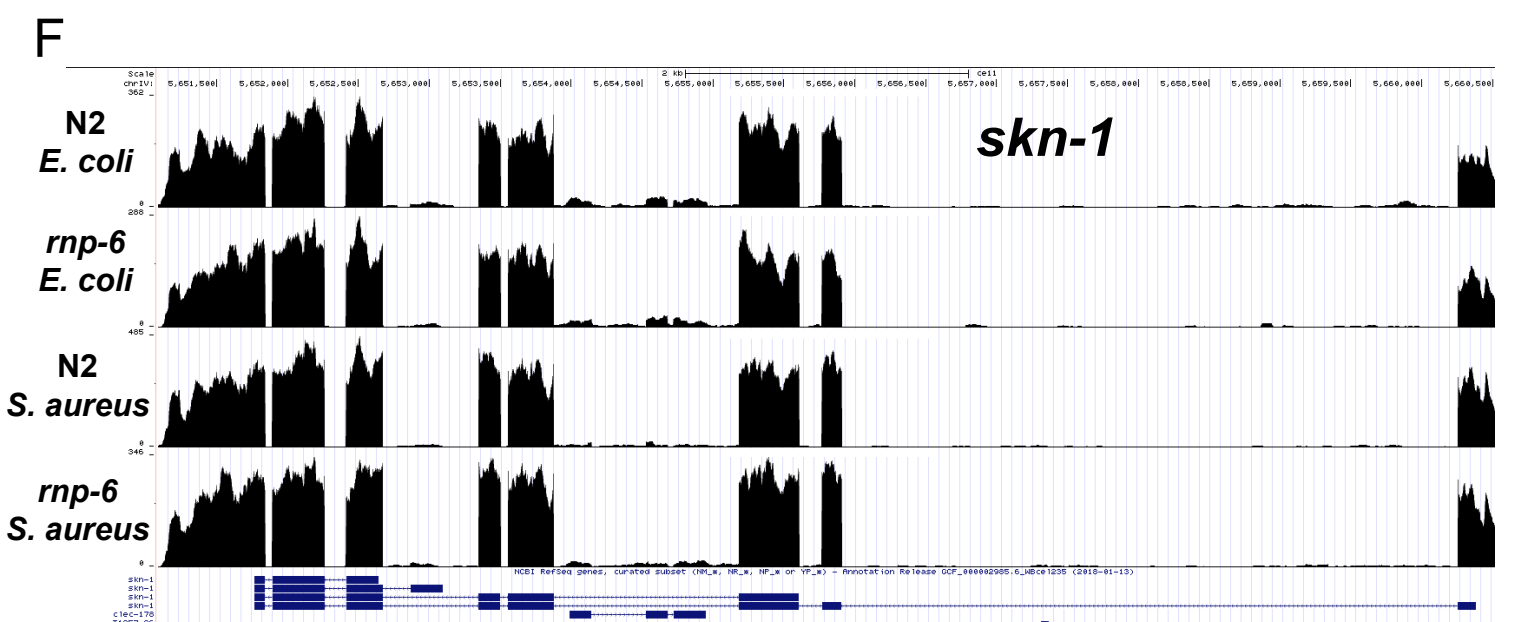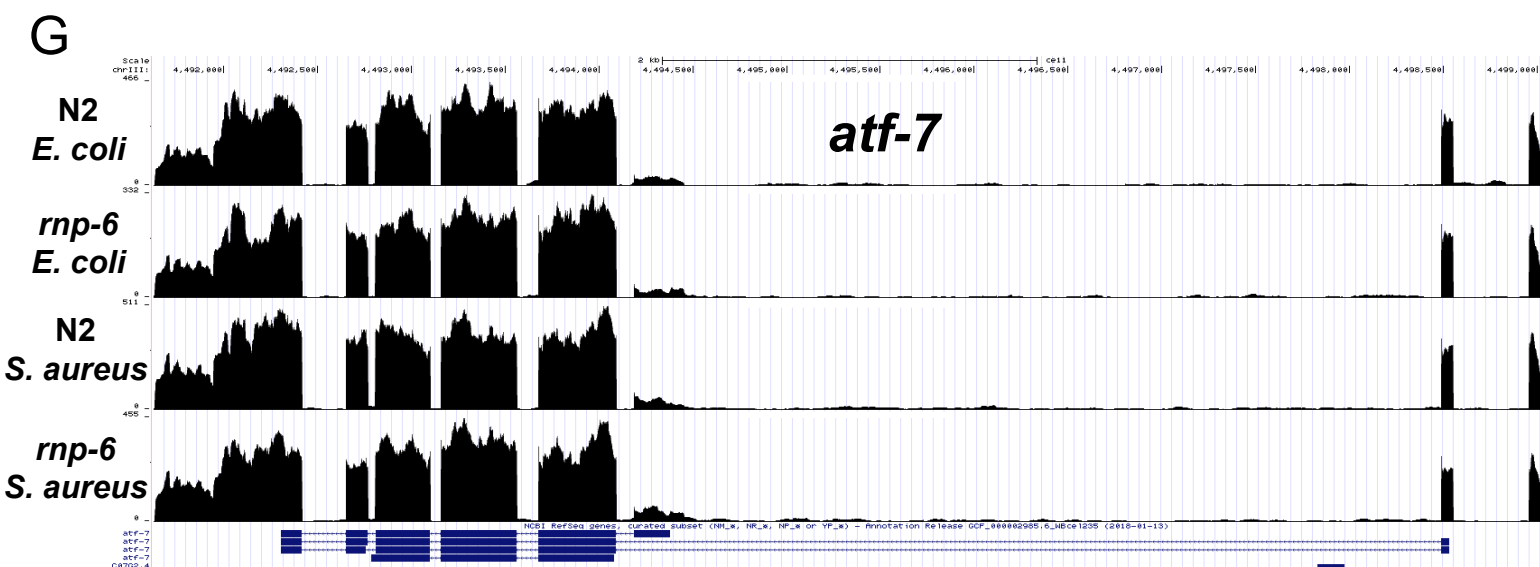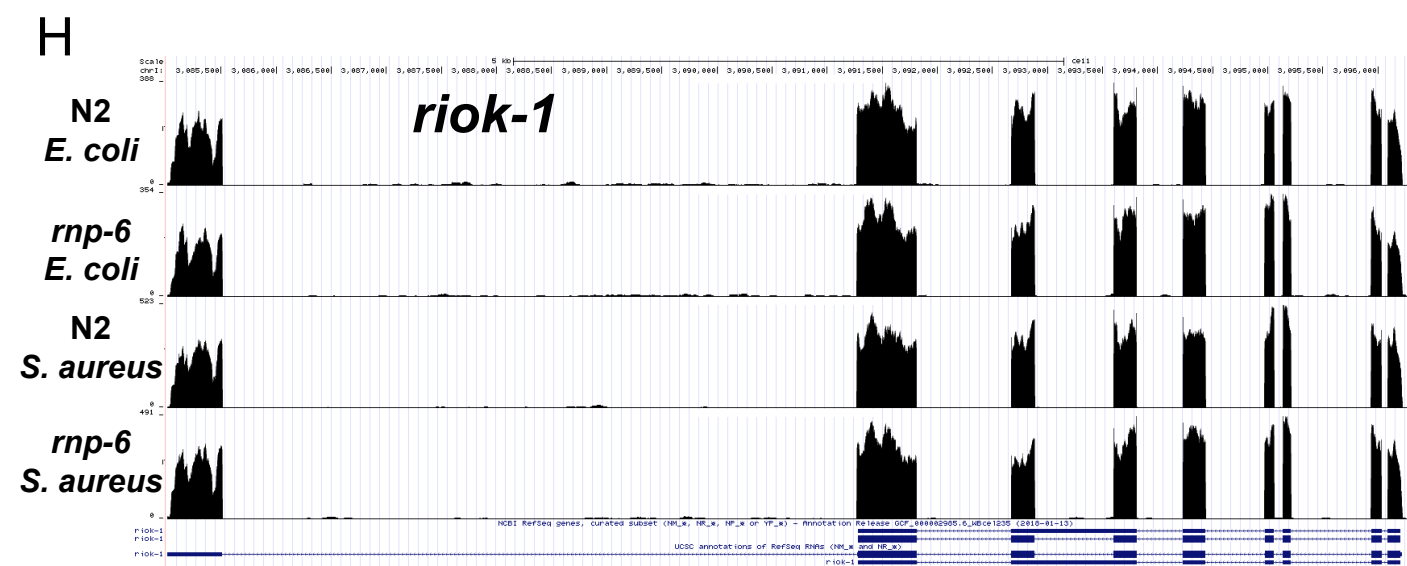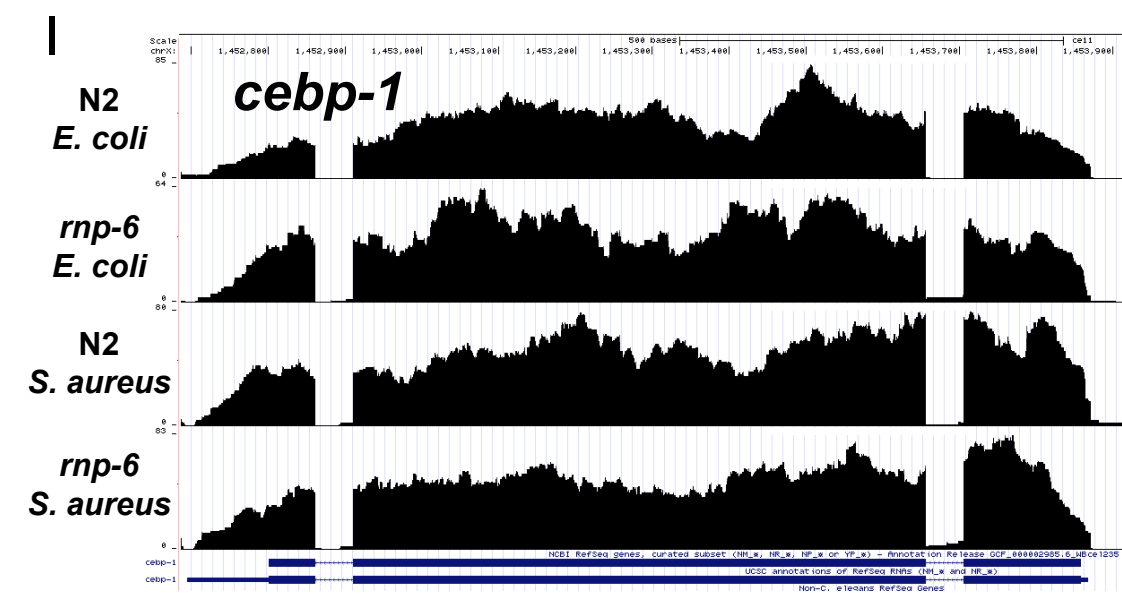

Supplement: supp [file elife_poa_e57591_Figure_5_figure_supplement_2.pdf › elife_poa_e57591_Figure_5_figure_supplement_2.pdf]

A

*E. faecalis*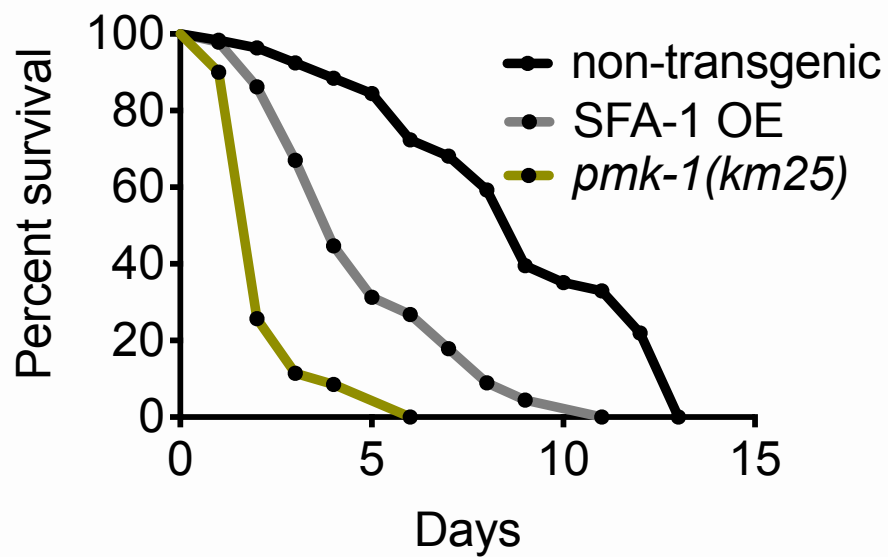

B

*S. aureus*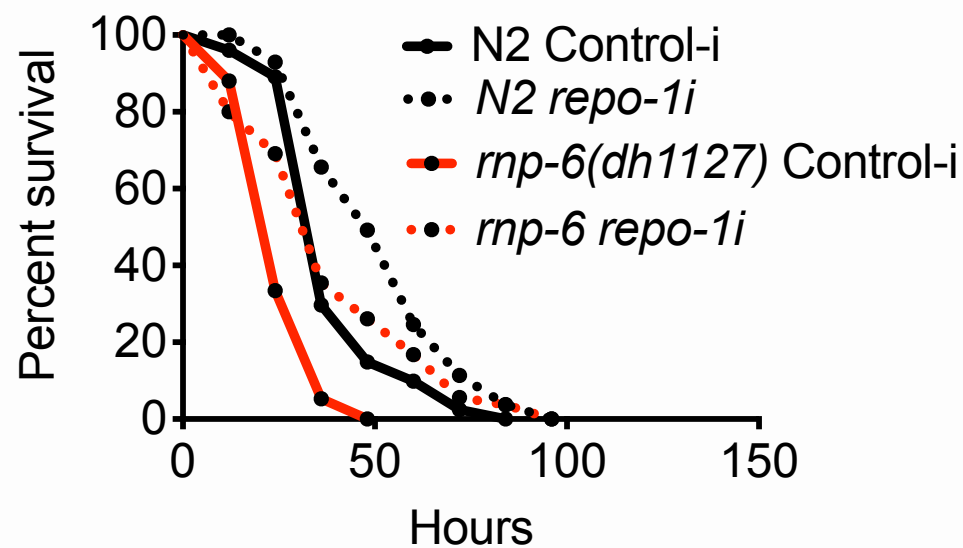

C

*S. aureus*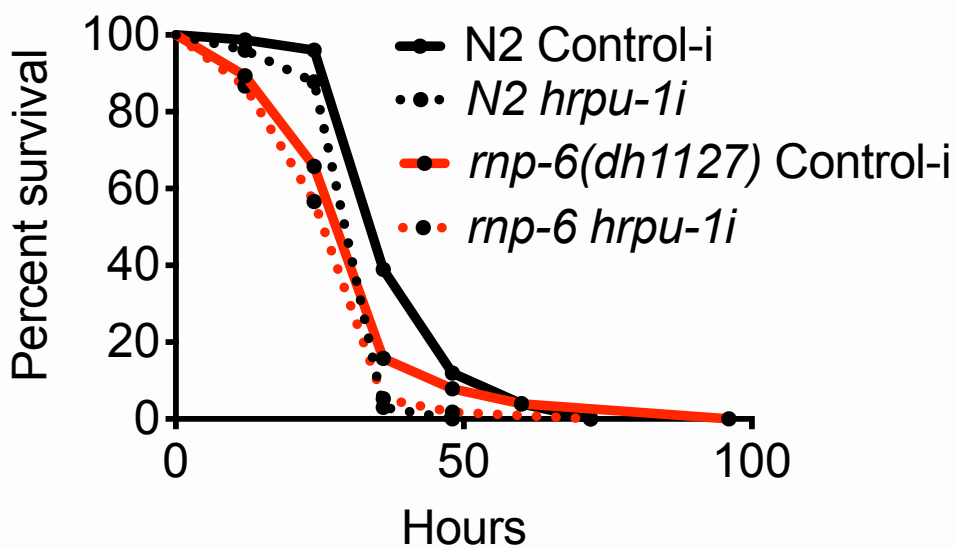

D

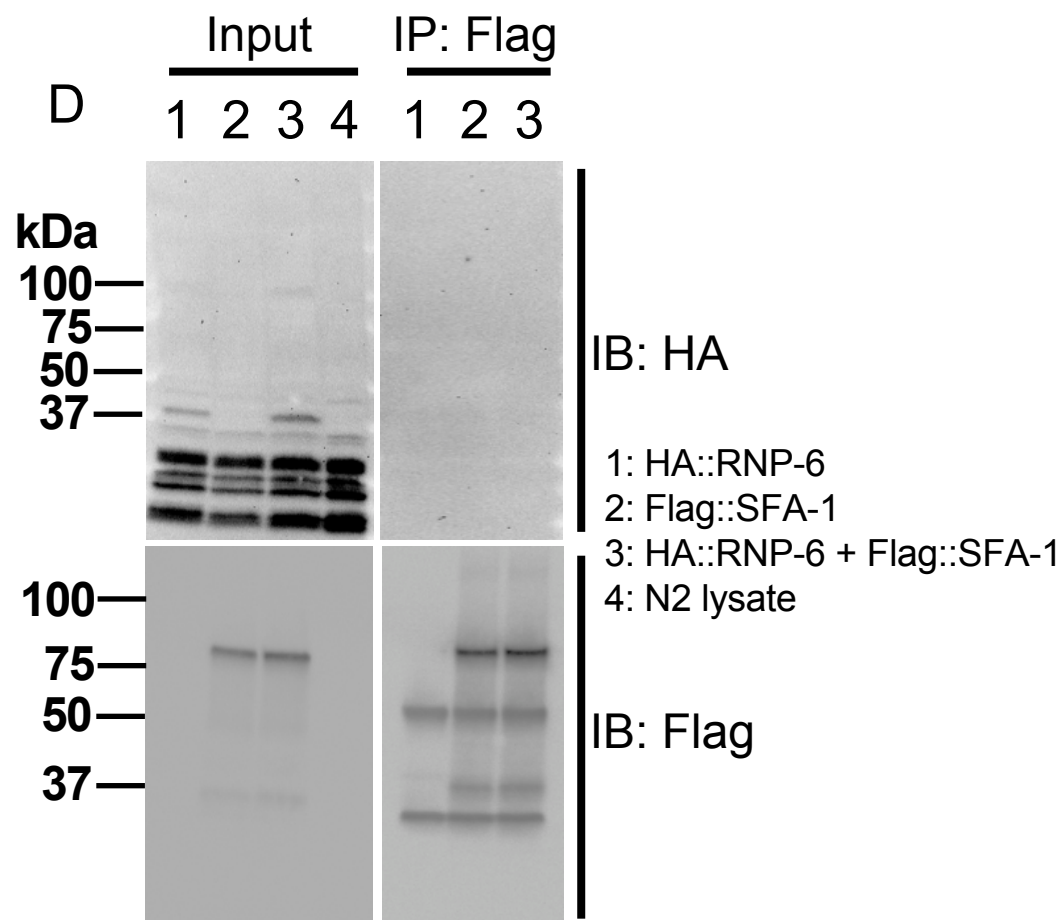

Supplement: supp [file elife_poa_e57591_Figure_6_figure_Supplement_1.pdf › elife_poa_e57591_Figure_6_figure_Supplement_1.pdf]

A

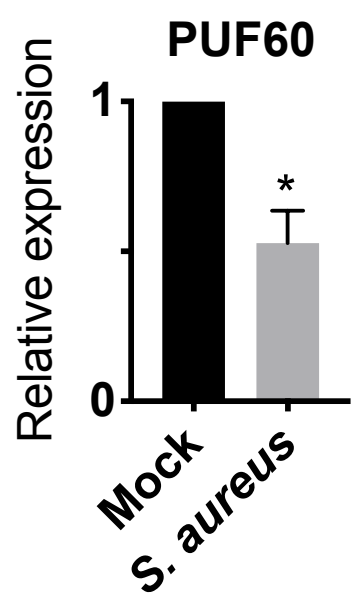

B

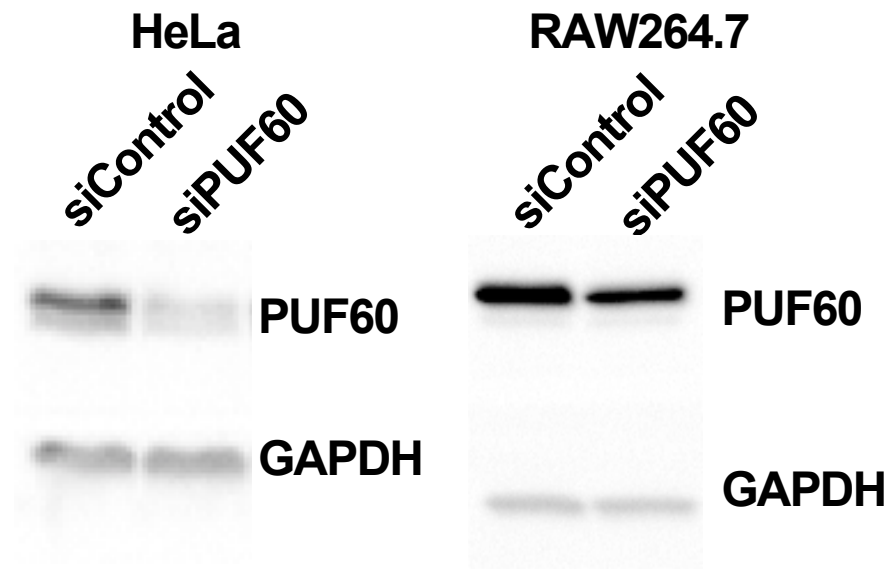

C

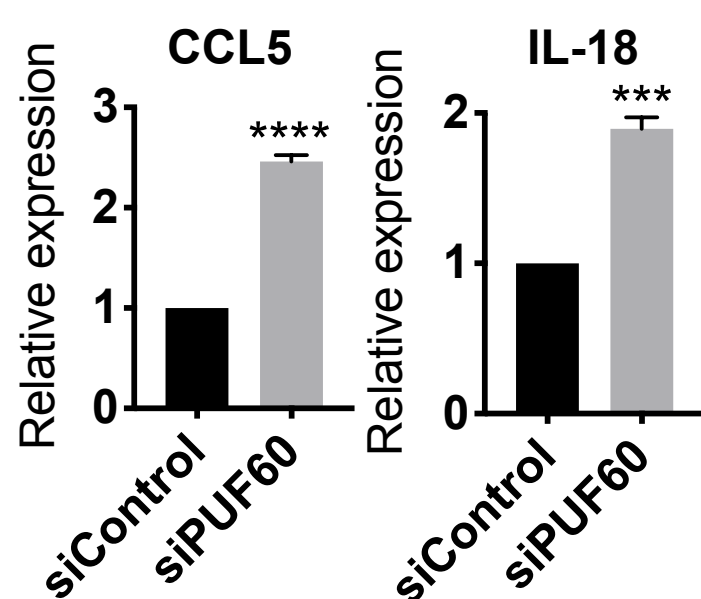

D

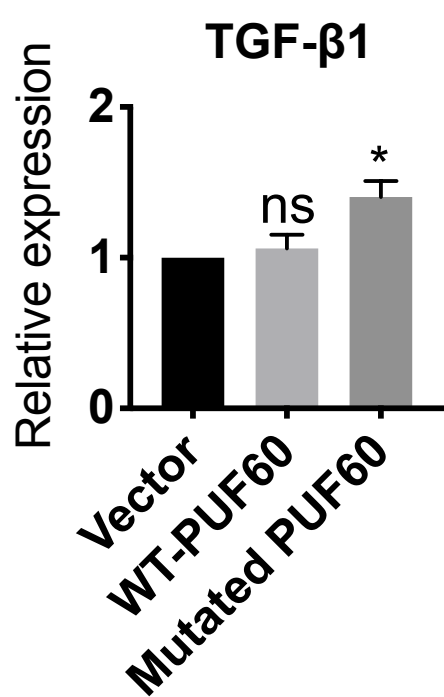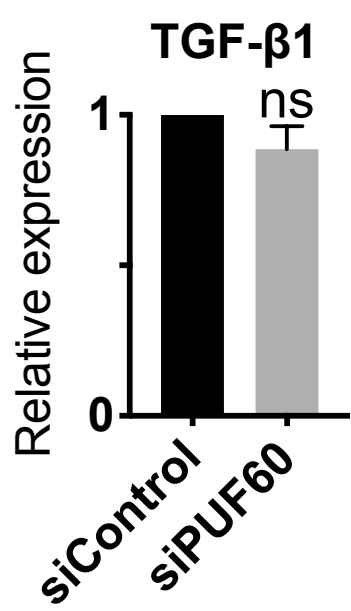

E

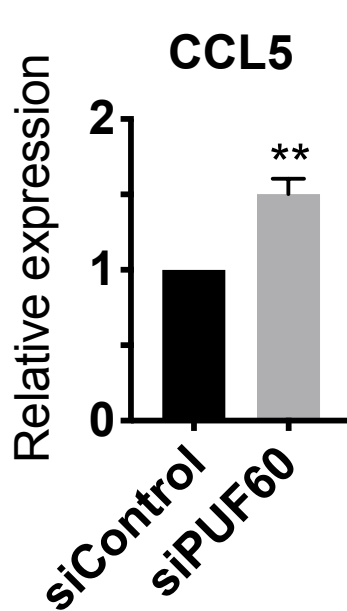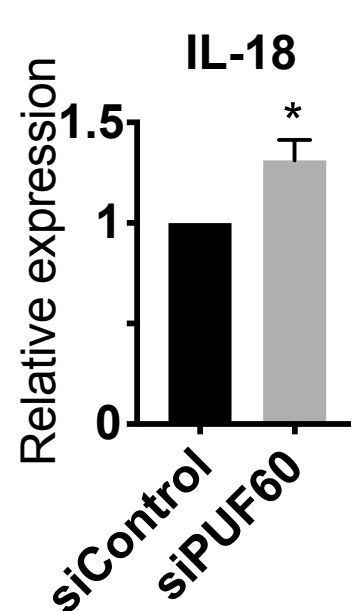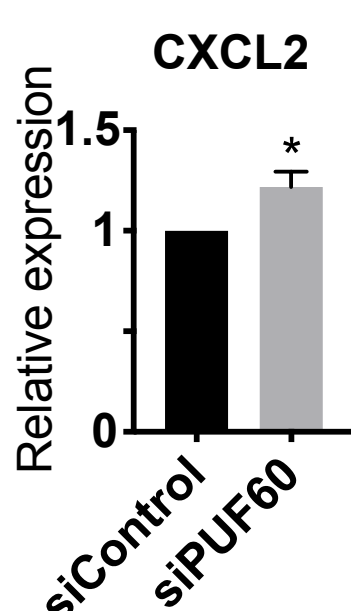

F

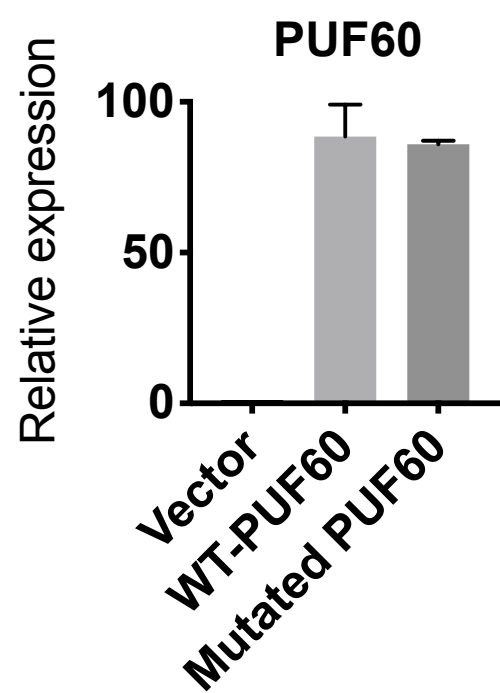

G

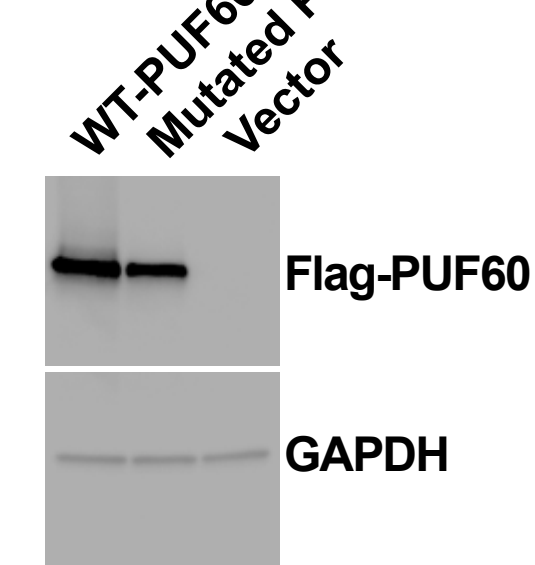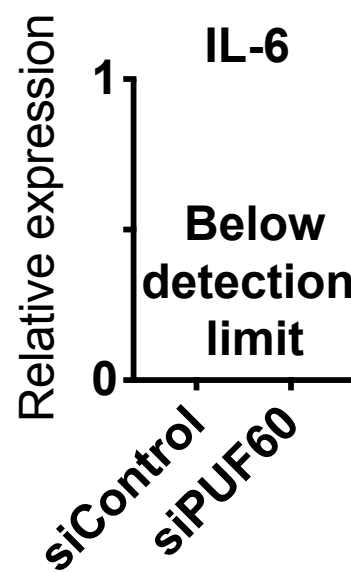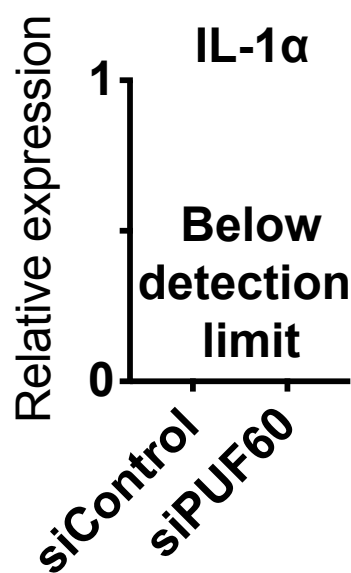

H

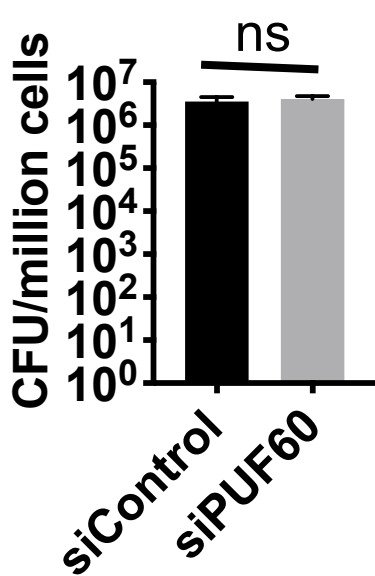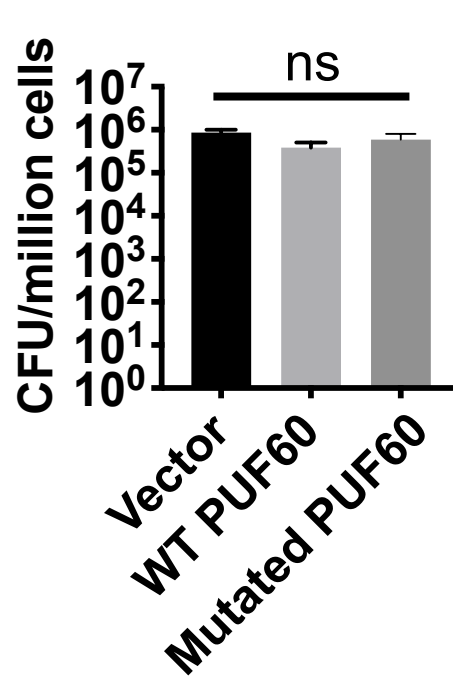

Supplement: supp [file elife_poa_e57591_Figure_7_figure_Supplement_1.pdf › elife_poa_e57591_Figure_7_figure_Supplement_1.pdf]
